# Supplementary material for: (3 + 2)-Annulation of 1,3-N,Si-tetraorganosilane reagents TsHNCH2SiBnR1R2 with arynes for efficient synthesis of 3-silaindolines
Source: Royal Society of Chemistry journal article supplement (doi:10.1039/d2qo01075e), 2022-01-01
Supplement: d2qo01075e1.pdf [file d2qo01075e1.pdf]

# (3+2)-Annulation of 1,3-N,Si-tetraorganosilane Reagents TsHNCH<sub>2</sub>SiBnR<sup>1</sup>R<sup>2</sup> with Benzyne for Efficient Synthesis of 3- Silaindolines

Deyun Cui,<sup>a</sup> Ying Feng,<sup>a</sup> Yu Gan,<sup>b</sup> Jiaqi Yin,<sup>b</sup> Wanshu Wang,<sup>a</sup> Yu Fan,<sup>a</sup> Lu Gao,<sup>a</sup> Bowen Ke<sup>b\*</sup> and Zhenlei Song<sup>a\*</sup>

<sup>a</sup>Key Laboratory of Drug-Targeting and Drug Delivery System of the Education Ministry and Sichuan Province, Sichuan Engineering Laboratory for Plant-Sourced Drug and Sichuan Research Center for Drug Precision Industrial Technology, West China School of Pharmacy, Sichuan University, Chengdu, 610041, China

<sup>b</sup>Department of Anesthesiology, Laboratory of Anesthesia and Critical Care Medicine, National-Local Joint Engineering Research Centre of Translational Medicine of Anesthesiology, West China Hospital, Sichuan University, Chengdu, 610041, China

E-mail: [bowenke@scu.edu.cn](mailto:bowenke@scu.edu.cn); [zhenleisong@scu.edu.cn](mailto:zhenleisong@scu.edu.cn)

## Table of Contents

|                                                                                  |          |
|----------------------------------------------------------------------------------|----------|
| 1. General Information.....                                                      | S2       |
| 2. Synthesis of 1,3-N, Si-Reagent <b>1</b> .....                                 | S3-S20   |
| 3. Synthesis of aryne precursors <b>2</b> .....                                  | S21-S33  |
| 4. Synthesis of 3-silaindoline <b>3</b> .....                                    | S34-S48  |
| 5. Enantioselective Synthesis of 1,3-N, Si-Reagent ( <i>S</i> )- <b>1p</b> ..... | S49      |
| 6. Mechanistic Studies.....                                                      | S50      |
| 7. Functionalization of 3-silaindoline <b>3</b> .....                            | S51-S56  |
| 8. X-Ray Crystallographic Data of <b>3a</b> and ( <i>S</i> )- <b>1p</b> .....    | S57-S70  |
| 9. Bioactivity Evaluation.....                                                   | S71-S74  |
| 10. <sup>1</sup> H and <sup>13</sup> C NMR Spectral Copies.....                  | S75-S284 |

## 1. General Information

Commercial reagents were used without any purification. Chloro(chloromethyl)dimethylsilane, Benzylmagnesium chloride, Cs<sub>2</sub>CO<sub>3</sub> and 18-crown-6 were purchased from Adamas-*beta*, *tert*-butyl tosylcarbamate was purchased from Energy Chemicals. Other reagents were used as purchased from J&K, Aldrich, Adamas-*beta*, Alfa Aesar or Energy Chemicals reagent suppliers. Aryne precursors were purchased for those are commercially available, or were prepared according to literatures for those are known compounds, or were synthesized as new compounds. DMF and CH<sub>2</sub>Cl<sub>2</sub> were distilled from CaH<sub>2</sub>. Toluene, DME and THF were distilled from sodium. Inert atmosphere techniques were carried out through Schlenk system and Standard Glovebox (purchased from Vigor Gas Purification Technologies (Suzhou) Co. Ltd.). Reactions were monitored by TLC which was performed on glass-backed silica plates and visualized using UV, KMnO<sub>4</sub> stains. Column chromatography was performed using silica gel (200-300 mesh or 300-400 mesh, purchased from Yantai Jiangyou Silica Gel Development Co. Ltd.) eluting with EtOAc/petroleum ether. Melting point were recorded at WRX-4 Melting-point Apparatus (purchased from Shanghai Yice Apparatus & Equipments Co. Lit.). <sup>1</sup>H NMR spectra were recorded at 400 MHz (Varian and Bruker) or 600 MHz (Agilent), <sup>13</sup>C NMR spectra were recorded at 100 MHz (Bruker) and 150 MHz (Agilent), and <sup>29</sup>Si NMR spectra were recorded at 400 MHz (Bruker) using CDCl<sub>3</sub> (except where noted) with TMS or residual solvent as standard. Infrared spectra were obtained using PerkinElmer Spectrum Two FTIR Spectrometer. High-resolution mass spectral analyses performed on Sciex Q-TOF or ThermoFisherScienti Orbitrap in positive or negative mode. X-ray diffraction experiment was carried out on Xcalibur E and the data obtained was deposited at the Cambridge Crystallographic Data Centre. Enantiomeric excess was determined by HPLC (Agilent Technologies: 1260 Infinity II) analysis on chiral column. Specific optical rotation was measured on Chiralpak® AS-H column. All spectral data obtained for new compounds are reported here.

## 2. Synthesis of 1,3-N, Si-Reagent 1

### *N*-((benzyltrimethylsilyl)methyl)-4-methylbenzenesulfonamide (1a)

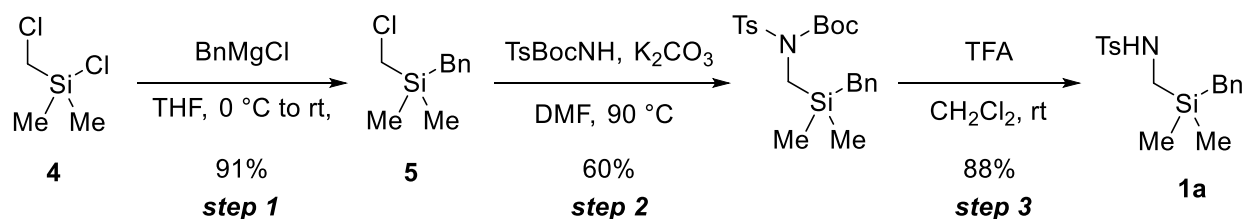

**Step 1:** To a solution of chloro(chloromethyl)dimethylsilane **4** (5.00 g, 34.94 mmol) in anhydrous THF (50 mL) at 0 °C under argon atmosphere was added benzylmagnesium chloride (40.89 mL of 1 M solution in THF, 40.89 mmol) dropwise over 1 h. Care was taken to maintain the temperature below 10 °C until all the reagents were added. After addition was completed, the reaction mixture was warmed up to room temperature and stirred overnight before quenching with sat. aq.  $\text{NH}_4\text{Cl}$  and extracting with  $\text{Et}_2\text{O}$  ( $3 \times 50$  mL). The combined organic layers were washed with sat. aq.  $\text{NaCl}$ , dried over  $\text{Na}_2\text{SO}_4$  and concentrated under reduced pressure. The crude residue was purified by silica gel flash column chromatography (eluent: petroleum ether) to give the product benzyl(chloromethyl)dimethylsilane **5** as a colorless oil (6.32 g, 91%).

**Step 2:** To a suspension of  $\text{TsBocNH}$  (12.94 g, 47.69 mmol, 1.5 equiv.) and  $\text{K}_2\text{CO}_3$  (6.59 g, 47.69 mmol, 1.5 equiv.) in DMF (60 mL) was added benzyl(chloromethyl)dimethylsilane **5** (6.32 g, 31.80 mmol) at room temperature. The resulting mixture was stirred at 90 °C for 6 h. The reaction was cooled to room temperature and quenched by sat. aq.  $\text{NH}_4\text{Cl}$ . The mixture was extracted with  $\text{EtOAc}$  ( $3 \times 50$  mL). The combined organic phases were washed with sat. aq.  $\text{NaCl}$ , dried over  $\text{Na}_2\text{SO}_4$  and concentrated under reduced pressure. The crude residue was purified by silica gel flash column chromatography (eluent:  $\text{EtOAc}/$  petroleum ether = 1/10) to give the product *tert*-butyl ((benzyltrimethylsilyl)methyl)(tosyl)carbamate as a white solid (8.27 g, 60%).

**Step 3:** To a solution of *tert*-butyl ((benzyltrimethylsilyl)methyl)(tosyl)carbamate (8.27 g, 19.07 mmol) in  $\text{CH}_2\text{Cl}_2$  (80 mL) was added TFA (21.75 g, 190.71 mmol, 10.0 equiv.) dropwise at room temperature. The reaction was stirred at room temperature for 1 h before quenching with sat. aq.  $\text{NaHCO}_3$  and stirring at room temperature for additional 10 min. The resulting mixture was extracted with  $\text{CH}_2\text{Cl}_2$  ( $3 \times 50$  mL). The combined organic phases were washed with sat. aq.  $\text{NaCl}$ , dried over  $\text{Na}_2\text{SO}_4$  and concentrated under reduced pressure. The crude residue was purified by silica gel flash column chromatography ( $\text{EtOAc}/$  petroleum ether = 1/10) to give the product **1a** as a white solid (5.6 g, 88%).

- $R_f = 0.5$  ( $\text{EtOAc}/$ Petroleum Ether = 1/4).
- mp: 113.5 – 115.6 °C.
- $^1\text{H}$  NMR (400 MHz,  $\text{CDCl}_3$ )  $\delta$  7.71 (d,  $J = 8.4$  Hz, 2H), 7.32 (d,  $J = 8.0$  Hz, 2H), 7.17 (t,  $J = 7.2$  Hz, 2H), 7.09 (t,  $J = 7.2$  Hz, 1H), 6.91 (d,  $J = 7.2$  Hz, 2H), 4.12 (t,  $J = 6.0$  Hz, 1H), 2.44 (s, 3H), 2.28 (d,  $J = 6.0$  Hz, 2H), 2.12 (s, 2H), 0.04 (s, 6H).
- $^{13}\text{C}$  NMR (100 MHz,  $\text{CDCl}_3$ )  $\delta$  143.4, 138.6, 135.3, 129.6, 128.6, 127.9, 127.5, 124.6, 30.8, 24.0, 21.5, -4.7.
- $^{29}\text{Si}$  NMR (400 MHz,  $\text{CDCl}_3$ )  $\delta$  -1.94.

- IR (neat)  $\text{cm}^{-1}$  3272, 3006, 1321, 1275, 1260, 1160, 849, 750.
- HRMS calcd for  $\text{C}_{17}\text{H}_{24}\text{NO}_2\text{SSi}$  ( $\text{M}+\text{H}$ )<sup>+</sup>: 334.1292, found 334.1292.

**N-((benzyldimethylsilyl)methyl)-2-methylpropane-2-sulfonamide (1c)**

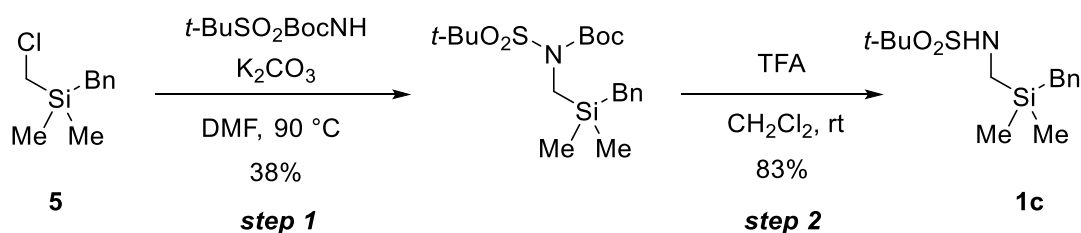

**1c** was prepared according to the last two steps used for preparation of **1a**.

**Step 1:** Benzyl(chloromethyl)dimethylsilane **5** (1.90 g, 9.56 mmol), *t*-BuSO<sub>2</sub>BocNH (3.40 g, 14.34 mmol, 1.5 equiv.) and K<sub>2</sub>CO<sub>3</sub> (1.98 g, 14.34 mmol, 1.5 equiv.) in DMF (20 mL) at 90 °C for 3 h gave *tert*-butyl ((benzyldimethylsilyl)methyl)(*tert*-butylsulfonyl)carbamate as a pale yellow oil (1.45 g, 38%).

**Step 2:** *Tert*-butyl ((benzyldimethylsilyl)methyl)(*tert*-butylsulfonyl)carbamate (1.45 g, 3.63 mmol), TFA (4.14 g, 36.28 mmol, 10.0 equiv.) in CH<sub>2</sub>Cl<sub>2</sub> (15 mL) at room temperature for 1 h afforded **1c** as a white solid (905 mg, 83%).

- mp: 60.4 – 62.0 °C.
- R<sub>f</sub> = 0.6 (EtOAc/Petroleum Ether = 1/5).
- <sup>1</sup>H NMR (400 MHz, CDCl<sub>3</sub>) δ 7.14 (t, *J* = 7.6 Hz, 2H), 7.00 (t, *J* = 7.2 Hz, 1H), 6.93 (d, *J* = 7.2 Hz, 2H), 3.37 (d, *J* = 6.0 Hz, 1H), 2.57 (d, *J* = 6.0 Hz, 2H), 2.08 (s, 2H), 1.25 (s, 9H), 0.00 (s, 6H).
- <sup>13</sup>C NMR (100 MHz, CDCl<sub>3</sub>) δ 138.7, 128.6, 127.9, 124.6, 60.3, 33.2, 24.5, 24.2, -4.7.
- IR (neat)  $\text{cm}^{-1}$  3291, 3024, 2956, 1738, 1599, 1493, 1298, 1248, 1056, 825.
- HRMS calcd for  $\text{C}_{14}\text{H}_{26}\text{NO}_2\text{SSi}$  ( $\text{M}+\text{Na}$ )<sup>+</sup>: 322.1267, found 322.1257.

**N-((benzyl(ethyl)(methyl)silyl)methyl)-4-methylbenzenesulfonamide (1e)**

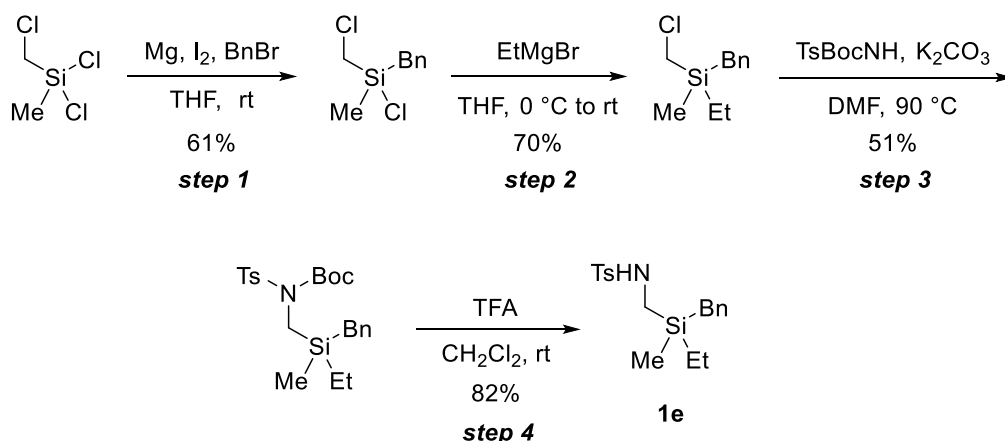

**Step 1:** To a suspension of magnesium (1.10 g, 45.08 mmol, 3.0 equiv.) and a grain of I<sub>2</sub> in anhydrous THF (5 mL) was added a small amount (about 20 drops) solution of the benzyl bromide in THF by syringe at room temperature under argon atmosphere. The reaction was initiated and heated to reflux with addition the rest of the benzyl bromide solution (2.57 g, 15.03 mmol, 1.0 equiv. in 20 mL THF)

dropwise over 30 min. The resulting mixture was stirred at room temperature for additional 1 h. The resulting Grignard reagent solution, which was separated from residual magnesium turnings by decantation, was added dropwise within 90 min to a solution of dichloro(chloromethyl)(methyl)silane (2.46 g, 5.01 mmol, 1.0 equiv.) in anhydrous THF (20 mL) at 0 °C under argon atmosphere. After addition was completed, the reaction mixture was warmed up to room temperature and stirred for 24 h. The reaction mixture was concentrated under reduced pressure, causing a precipitation. The precipitate was separated by decantation and washed with *n*-hexane (3 × 30 ml), and all organic solutions were combined. The solvent was removed as described above, and the crude product was isolated by distillation *in vacuo* (b.p.: 70 °C/0.8mmHg) to afford the benzylchloro(chloromethyl)-(methyl)silane as a colorless oil (2.01 g, 61%).

**1e** was then prepared from benzylchloro(chloromethyl)(methyl)silane according to the procedure as that used for **1a**.

**Step 2:** Benzylchloro(chloromethyl)(methyl)silane (2.01 g, 9.12 mmol), ethylmagnesium bromide (10.04 mL, 1 M in THF, 1.1equiv.) in anhydrous THF (20 mL) at room temperature under argon overnight afforded benzyl(chloromethyl)(ethyl)(methyl)silane as a colorless oil (1.36 g, 70%).

**Step 3:** Benzyl(chloromethyl)(ethyl)(methyl)silane (1.36 g, 6.39 mmol), TsBocNH (2.60 g, 9.59 mmol, 1.5 equiv.), K<sub>2</sub>CO<sub>3</sub> (1.32 g, 9.59 mmol, 1.5 equiv.) in DMF (10 mL) at 90 °C for 6 h gave *tert*-butyl ((benzyl(ethyl)(methyl)silyl)methyl)(tosyl)carbamate as a colorless oil (1.46 g, 51%).

**Step 4:** *Tert*-butyl ((benzyl(ethyl)(methyl)silyl)methyl)(tosyl)carbamate (1.46 g, 3.26 mmol), TFA (3.72 g, 32.61 mmol, 10.0 equiv.) in CH<sub>2</sub>Cl<sub>2</sub> (15 mL) at room temperature for 1 h afforded **1e** as white solid (927 mg, 82%).

- R<sub>f</sub> = 0.5 (EtOAc/Petroleum Ether = 1/4).
- mp : 92.0 – 94.0 °C.
- <sup>1</sup>H NMR (400 MHz, CDCl<sub>3</sub>) δ 7.68 (d, *J* = 8.0 Hz, 2H), 7.32 (d, *J* = 8.0 Hz, 2H), 7.17 (t, *J* = 7.6 Hz, 2H), 7.09 (t, *J* = 7.2 Hz, 1H), 6.90 (d, *J* = 7.2 Hz, 2H), 3.84 (t, *J* = 6.4 Hz, 1H), 2.45 (s, 3H), 2.28 (d, *J* = 6.0 Hz, 2H), 2.11 (s, 2H), 0.90 (t, *J* = 8.0 Hz, 3H), 0.56 (q, *J* = 8.0 Hz, 2H), 0.01 (s, 3H).
- <sup>13</sup>C NMR (100 MHz, CDCl<sub>3</sub>) δ 143.3, 138.7, 135.2, 129.6, 128.6, 127.8, 127.5, 124.5, 29.3, 22.4, 21.5, 6.9, 3.9, -6.9.
- IR (neat) cm<sup>-1</sup> 3273, 2955, 1958, 1492, 1451, 1320, 1275, 1260, 1158, 1055, 750.
- HRMS calcd for C<sub>18</sub>H<sub>25</sub>NNaO<sub>2</sub>SSi (M+Na)<sup>+</sup>: 370.1267, found 370.1263.

**N-((benzyl(methyl)(pentyl)silyl)methyl)-4-methylbenzenesulfonamide (1f)**

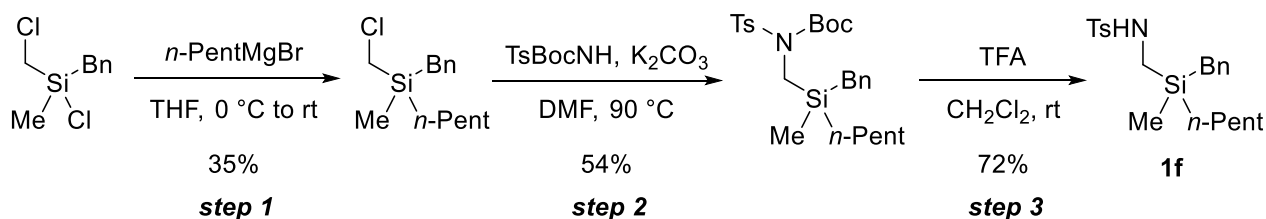

**1f** was prepared according to the procedure as that used for **1a**.

**Step 1:** Benzylchloro(chloromethyl)(methyl)silane (2.00 g, 9.12 mmol), pentylmagnesium bromide (10.04 mL, 1.0 M in THF, 1.1 equiv.) in anhydrous THF (20 mL) at room temperature under argon atmosphere overnight gave benzyl(chloromethyl)(methyl)(pentyl)silane as colorless oil (816 mg, 35%).

**Step 2:** Benzyl(chloromethyl)(methyl)(pentyl)silane (816 mg, 3.20 mmol), TsBocNH (1.30 g, 4.8 mmol, 1.5 equiv.), K<sub>2</sub>CO<sub>3</sub> (663 mg, 4.80 mmol, 1.5equiv.) in DMF (10 mL) at 90 °C for 6 h gave the *tert*-butyl ((benzyl(methyl)(pentyl)silyl)methyl)(tosyl)carbamate as a colorless oil (848 mg, 54%).

**Step 3:** *Tert*-butyl ((benzyl(methyl)(pentyl)silyl)methyl)(tosyl)carbamate (848 mg, 1.78 mmol), TFA (2.03 g, 17.83 mmol, 10.0 equiv.) in CH<sub>2</sub>Cl<sub>2</sub> (10 mL) at room temperature for 1 h afforded **1f** as white solid (500 mg, 72%).

- R<sub>f</sub> = 0.6 (EtOAc/Petroleum Ether = 1/4).
- mp: 90.2 – 95.6 °C.
- <sup>1</sup>H NMR (400 MHz, CDCl<sub>3</sub>) δ 7.68 (d, *J* = 8.0 Hz, 2H), 7.31 (d, *J* = 8.0 Hz, 2H), 7.17 (t, *J* = 7.6 Hz, 2H), 7.09 (t, *J* = 7.6 Hz, 1H), 6.90 (d, *J* = 7.2 Hz, 2H), 3.89 (t, *J* = 6.0 Hz, 1H), 2.44 (s, 3H), 2.28 (d, *J* = 6.0 Hz, 2H), 2.11 (s, 2H), 1.40 – 1.10 (m, 6H), 0.86 (t, *J* = 6.4 Hz, 3H), 0.54 (t, *J* = 4.8 Hz, 2H), 0.01 (s, 3H).
- <sup>13</sup>C NMR (100 MHz, CDCl<sub>3</sub>) δ 143.3, 138.7, 135.2, 129.6, 128.6, 127.8, 127.5, 124.6, 35.6, 29.7, 22.9, 22.8, 22.2, 21.5, 13.9, 12.0, -6.4.
- IR (neat) cm<sup>-1</sup> 3277, 2922, 1452, 1323, 1275, 1260, 1159, 750.
- HRMS calcd for C<sub>21</sub>H<sub>32</sub>NO<sub>2</sub>SSi (M+H)<sup>+</sup>: 390.1918, found 390.1915.

***N*-((benzyl(3-methoxypropyl)(methyl)silyl)methyl)-4-methylbenzenesulfonamide (1g)**

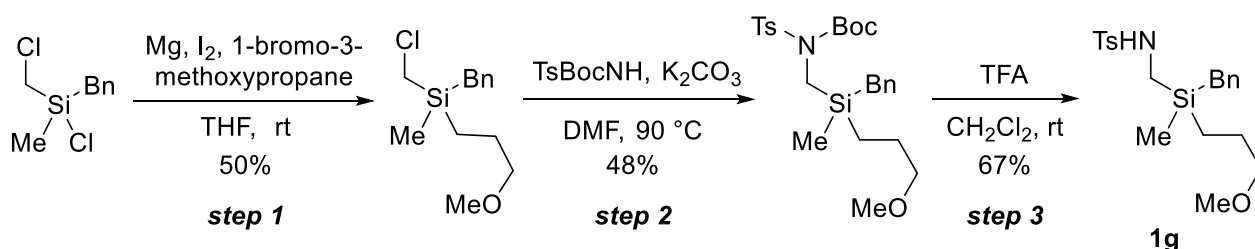

**Step 1:** To a suspension of magnesium (665 mg, 27.37 mmol, 3.0 equiv.) and a grain of I<sub>2</sub> in anhydrous THF (7 mL) was added a small amount (about 20 drops) solution of the 1-bromo-3-methoxypropane in THF by syringe at room temperature under argon atmosphere. The reaction was initiated and heated to reflux with addition the rest of the 1-bromo-3-methoxypropane solution (1.54 g, 10.04 mmol, 1.1 equiv. in 14 mL THF) dropwise over 30 min. The resulting mixture was stirred at room temperature for additional 1 h. The resulting Grignard reagent solution, which was separated from residual magnesium turnings by decantation, was added dropwise within 90 min to a solution of dichloro(chloromethyl)(methyl)silane (2.00 g, 9.12 mmol, 1.0 equiv.) in anhydrous THF (20 mL) at 0 °C under argon atmosphere. After addition was completed, the reaction mixture was warmed up to room temperature and stirred for 24 h before quenching with sat. aq. NH<sub>4</sub>Cl and extracting with Et<sub>2</sub>O (3 × 30 mL). The combined organic layers were washed with sat. aq. NaCl, dried over Na<sub>2</sub>SO<sub>4</sub> and concentrated under reduced pressure. The crude residue was purified by silica gel flash column

chromatography (eluent: EtOAc/petroleum ether = 1/20) to give the product benzyl(chloromethyl)(3-methoxypropyl)(methyl)silane as colorless oil (1.17 g, 50%).

**1g** was prepared from benzyl(chloromethyl)(3-methoxypropyl)(methyl)silane according to the procedure as that used for **1a**.

**Step 2:** Benzyl(chloromethyl)(3-methoxypropyl)(methyl)silane (1.17 g, 4.55 mmol), TsBocNH (1.85 g, 6.83 mmol, 1.5 equiv.), K<sub>2</sub>CO<sub>3</sub> (944 mg, 6.83 mmol, 1.5 equiv.) in DMF (10 mL) at 90 °C for 6 h gave the *tert*-butyl ((benzyl(3-methoxypropyl)(methyl)silyl)methyl)(tosyl)carbamate as colorless oil (1.07 g, 48%).

**Step 3:** *Tert*-butyl ((benzyl(3-methoxypropyl)(methyl)silyl)methyl)(tosyl)carbamate (1.07 g, 2.24 mmol), TFA (2.55 g, 22.40 mmol, 10.0 equiv.) in CH<sub>2</sub>Cl<sub>2</sub> (10 mL) at room temperature for 1 h afforded **1g** as white solid (588 mg, 67%).

- R<sub>f</sub> = 0.2 (EtOAc/Petroleum Ether = 1/4).
- mp: 94.5 – 99.2 °C.
- <sup>1</sup>H NMR (400 MHz, CDCl<sub>3</sub>) δ 7.68 (d, *J* = 8.4 Hz, 2H), 7.31 (d, *J* = 8.0 Hz, 2H), 7.18 (t, *J* = 7.6 Hz, 2H), 7.09 (t, *J* = 7.2 Hz, 1H), 6.91 (d, *J* = 7.2 Hz, 2H), 4.37 (t, *J* = 6.0 Hz, 1H), 3.33 (s, 3H), 3.30 (t, *J* = 6.4 Hz, 2H), 2.44 (s, 3H), 2.34 – 2.21 (m, 2H), 2.12 (dd, *J* = 17.2, 14.0 Hz, 2H), 1.64 – 1.38 (m, 2H), 0.80 – 0.46 (m, 2H), 0.00 (s, 3H).
- <sup>13</sup>C NMR (100 MHz, CDCl<sub>3</sub>) δ 143.2, 138.6, 135.3, 129.5, 128.6, 127.9, 127.5, 124.6, 74.8, 58.5, 29.6, 23.3, 22.8, 21.5, 8.4, -6.3.
- IR (neat) cm<sup>-1</sup> 3278, 2925, 1598, 1493, 1451, 1322, 1260, 1275, 1159, 1094, 750.
- HRMS calcd for C<sub>20</sub>H<sub>30</sub>NO<sub>3</sub>SSi (M+H)<sup>+</sup>: 392.1710, found 392.1715.

#### *N*-(((2-(1,3-dioxolan-2-yl)ethyl)(benzyl)(methyl)silyl)methyl)-4-methylbenzenesulfonamide (1h)

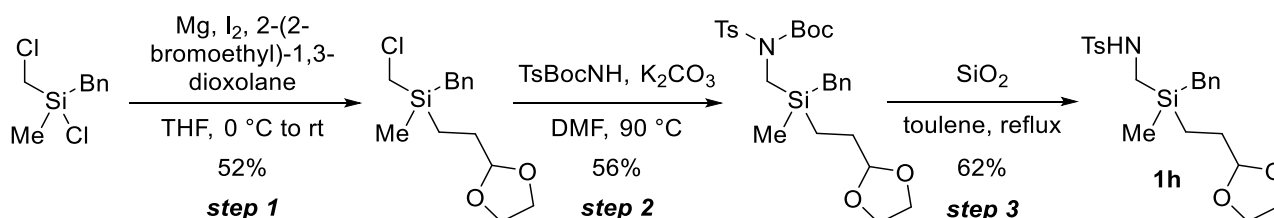

**1h** was prepared according to the procedure as that used for **1g**.

**Step 1:** Magnesium (665 mg, 27.37 mmol, 3.0 equiv.), a grain of I<sub>2</sub>, 2-(2-Bromoethyl)-1,3-dioxolane (1.82 g, 10.04 mmol, 1.1 equiv.), benzylchloro(chloromethyl)(methyl)silane (2.00 g, 9.12 mmol, 1.0 equiv.) in anhydrous THF at room temperature for 24 h gave (2-(1,3-dioxolan-2-yl)ethyl)benzyl(chloromethyl)(methyl)silane as a colorless oil (1.35 g, 52%).

**Step 2:** (2-(1,3-Dioxolan-2-yl)ethyl)benzyl(chloromethyl)(methyl)silane (1.35 g, 4.74 mmol), TsBocNH (1.93 g, 7.11 mmol, 1.5 equiv.), K<sub>2</sub>CO<sub>3</sub> (983 mg, 7.11 mmol, 1.5 equiv.) in DMF (10 mL) at 90 °C for 6 h gave *tert*-butyl (((2-(1,3-dioxolan-2-yl)ethyl)(benzyl)(methyl)silyl)methyl)(tosyl)carbamate as a colorless oil (1.38 g, 56%).

**Step 3:** To a solution of *tert*-butyl (((2-(1,3-dioxolan-2-yl)ethyl)(benzyl)(methyl)silyl)methyl)(tosyl)carbamate (1.38 g, 2.66 mmol) in toluene (10 mL) was added SiO<sub>2</sub> (1.60 g, 26.55 mmol, 10.0 equiv.).

The reaction mixture was refluxed at 130 °C for 2 h. After the reaction was completed, the mixture was concentrated under reduced pressure. The crude residue was purified by silica gel flash column chromatography (eluent: EtOAc/petroleum ether = 1/4) to give the product **1h** as a white solid (688 mg, 62%).

- $R_f$  = 0.2 (EtOAc/Petroleum Ether = 1/4).
- mp: 79.4 – 83.7 °C.
- $^1\text{H}$  NMR (400 MHz,  $\text{CDCl}_3$ )  $\delta$  7.68 (d,  $J$  = 8.3 Hz, 2H), 7.31 (d,  $J$  = 8.0 Hz, 2H), 7.18 (t,  $J$  = 7.4 Hz, 2H), 7.09 (t,  $J$  = 7.4 Hz, 1H), 6.91 (d,  $J$  = 7.1 Hz, 2H), 4.78 (t,  $J$  = 4.4 Hz, 1H), 4.30 (t,  $J$  = 6.2 Hz, 1H), 4.14 – 3.91 (m, 2H), 3.90 – 3.75 (m, 2H), 2.44 (s, 3H), 2.35 – 2.22 (m, 2H), 2.13 (dd,  $J$  = 17.2, 14.0 Hz, 2H), 1.68 – 1.53 (m, 2H), 0.78 – 0.60 (m, 2H), 0.01 (s, 3H).
- $^{13}\text{C}$  NMR (100 MHz,  $\text{CDCl}_3$ )  $\delta$  143.3, 138.4, 135.3, 129.5, 128.6, 127.9, 127.5, 124.6, 105.2, 64.9, 29.5, 27.3, 22.7, 21.5, 5.4, -6.3.
- IR (neat)  $\text{cm}^{-1}$  1275, 750.
- HRMS calcd for  $\text{C}_{21}\text{H}_{29}\text{NNaO}_4\text{SSi}$  ( $\text{M}+\text{Na}$ ) $^+$ : 442.1478, found 442.1477.

***N-((benzyl(cyclopropyl)(methyl)silyl)methyl)-4-methylbenzenesulfonamide (1i)***

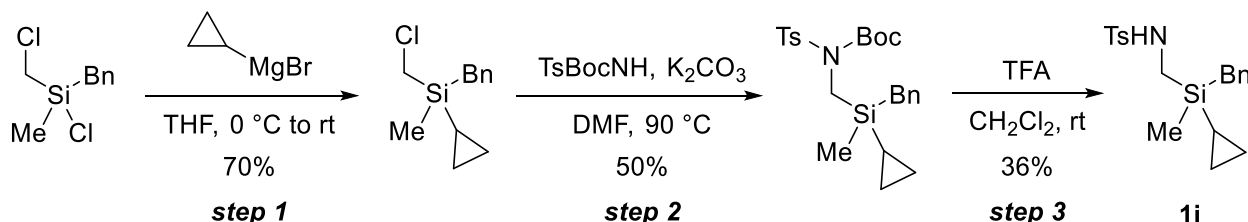

**1i** was prepared according to the procedure as that used for **1e**.

**Step 1:** Benzylchloro(chloromethyl)(methyl)silane (2.00 g, 9.12 mmol), cyclopropylmagnesium bromide (10.04 mL, 1.0 M in THF, 1.1 equiv.) in anhydrous THF (20 mL) at room temperature under argon atmosphere overnight gave benzyl(chloromethyl)(cyclopropyl)(methyl)silane as colorless oil (1.43 g, 70%).

**Step 2:** Benzyl(chloromethyl)(cyclopropyl)(methyl)silane (1.43 g, 6.36 mmol),  $\text{K}_2\text{CO}_3$  (1.32 g, 9.54 mmol, 1.5 equiv.), TsBocNH (2.59 g, 9.54 mmol, 1.5 equiv.) in DMF (14 mL) at 90 °C for 6 h gave *tert*-butyl ((benzyl(cyclopropyl)(methyl)silyl)methyl)(tosyl)carbamate as a colorless oil (1.46 g, 50%).

**Step 3:** *Tert*-butyl ((benzyl(cyclopropyl)(methyl)silyl)methyl)(tosyl)carbamate (1.46 g, 3.18 mmol), TFA (3.62 g, 31.76 mmol, 10.0 equiv.) in  $\text{CH}_2\text{Cl}_2$  (15 mL) at room temperature for 1 h afforded **1i** as white solid (410 mg, 36%).

- $R_f$  = 0.7 (EtOAc/Petroleum Ether = 1/4).
- mp: 105.9 – 111.9 °C.
- $^1\text{H}$  NMR (400 MHz,  $\text{CDCl}_3$ )  $\delta$  7.69 (d,  $J$  = 8.0 Hz, 2H), 7.32 (d,  $J$  = 8.0 Hz, 2H), 7.17 (t,  $J$  = 7.2 Hz, 2H), 7.09 (t,  $J$  = 7.2 Hz, 1H), 6.94 (d,  $J$  = 7.2 Hz, 2H), 3.92 (t,  $J$  = 6.4 Hz, 1H), 2.45 (s, 3H), 2.36 – 2.19 (m, 2H), 2.12 (dd,  $J$  = 16.8, 14.0 Hz, 2H), 0.84 – 0.44 (m, 2H), 0.29 – 0.13 (m, 2H), -0.15 (s, 3H), -0.46 (tt,  $J$  = 9.6, 6.8 Hz, 1H).
- $^{13}\text{C}$  NMR (100 MHz,  $\text{CDCl}_3$ )  $\delta$  143.3, 138.5, 135.3, 129.6, 128.5, 128.0, 127.5, 124.6, 29.8, 22.5,



21.5, 1.2, 1.2, -8.2, -8.4.

- IR (neat)  $\text{cm}^{-1}$  3275, 3063, 2999, 1598, 1492, 1410, 1320, 1252, 1158, 1093.
- HRMS calcd for  $\text{C}_{19}\text{H}_{26}\text{NO}_2\text{SSi}$  ( $\text{M}+\text{H}$ )<sup>+</sup>: 360.1448, found 360.1449.

**N-((benzyl(cyclobutyl)(methyl)silyl)methyl)-4-methylbenzenesulfonamide (1j)**

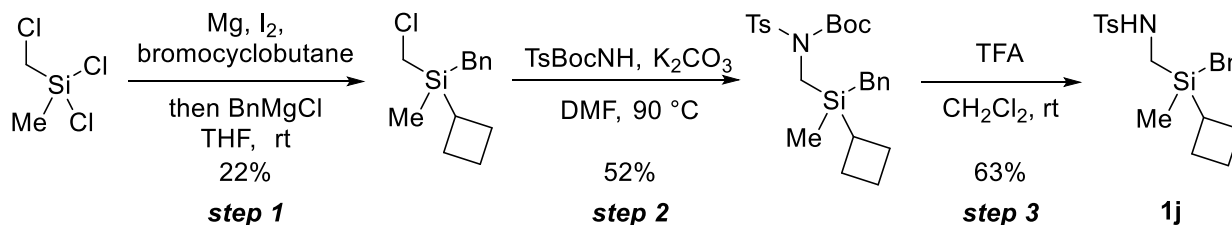

**Step 1:** To a suspension of magnesium (540 mg, 22.22 mmol, 1.5 equiv.) and a grain of I<sub>2</sub> in anhydrous THF (7 mL) was added a small amount (about 20 drops) solution of the bromocyclobutane in THF by syringe at ambient temperature under argon atmosphere. The reaction was initiated and heated to reflux with addition the rest of the bromocyclobutane solution (2.00 g, 14.81 mmol, 1.0 equiv. in 14 mL THF) dropwise over 30 min. The resulting mixture was stirred at room temperature for additional 1 h. The resulting Grignard reagent solution, which was separated from residual magnesium turnings by decantation, was added dropwise within 90 min to a solution of dichloro(chloromethyl)(methyl)silane (2.42 g, 14.81 mmol, 1.0 equiv.) at 0 °C under argon. After addition was completed, the reaction mixture was warmed up to room temperature and stirred for 24 h. Then the reaction system was cooled to 0 °C. To the mixture was added benzylmagnesium chloride (17.33 mL, 1.0 M in THF, 1.17 equiv.) dropwise over 1 h. After addition was completed, the reaction mixture was warmed up to room temperature and stirred for 24 h before quenching with sat. aq. NH<sub>4</sub>Cl and extracting with Et<sub>2</sub>O (3 × 30 mL). The combined organic layers were washed with sat. aq. NaCl, dried over Na<sub>2</sub>SO<sub>4</sub> and concentrated under reduced pressure. The crude residue was purified by silica gel flash column chromatography (eluent: petroleum ether) to give the product benzyl(chloromethyl)(cyclobutyl)(methyl)silane as a colorless oil (780 mg, 22%).

**1j** was prepared from benzyl(chloromethyl)(cyclobutyl)(methyl)silane according to the procedure as that used for **1a**.

**Step 2:** Benzyl(chloromethyl)(cyclobutyl)(methyl)silane (780 mg, 3.27 mmol), TsBocNH (1.33 g, 4.90 mmol, 1.5 equiv.), K<sub>2</sub>CO<sub>3</sub> (677 mg, 4.90 mmol, 1.5 equiv.) in DMF (10 mL) at 90 °C for 6 h gave *tert*-butyl ((benzyl(cyclobutyl)(methyl)silyl)methyl)(tosyl)carbamate as a colorless oil (805 mg, 52%).

**Step 3:** *Tert*-butyl ((benzyl(cyclobutyl)(methyl)silyl)methyl)(tosyl)carbamate (805 mg, 1.70 mmol), TFA (1.94 g, 17.01 mmol, 10.0 equiv.) in CH<sub>2</sub>Cl<sub>2</sub> (10 mL) at room temperature for 1 h afforded **1j** as a white solid (400 mg, 63%).

- R<sub>f</sub> = 0.5 (EtOAc/Petroleum Ether = 1/4).
- mp: 91.3 – 95.3 °C.
- <sup>1</sup>H NMR (400 MHz, CDCl<sub>3</sub>) δ 7.68 (d, *J* = 8.0 Hz, 2H), 7.32 (d, *J* = 8.0 Hz, 2H), 7.16 (t, *J* = 7.6 Hz, 2H), 7.08 (t, *J* = 7.2 Hz, 1H), 6.88 (d, *J* = 7.2 Hz, 2H), 3.86 (t, *J* = 6.0 Hz, 1H), 2.45 (s, 3H), 2.35 – 2.21 (m, 2H), 2.19 – 2.12 (m, 1H), 2.10 (s, 2H), 2.06 – 1.98 (m, 2H), 1.95 – 1.74 (m, 4H), 0.05 (s, 3H).

- $^{13}\text{C}$  NMR (100 MHz,  $\text{CDCl}_3$ )  $\delta$  143.3, 138.7, 135.2, 129.6, 128.6, 127.8, 127.5, 124.5, 28.7, 23.1, 23.0, 21.5, 19.0, -8.3.
- IR (neat)  $\text{cm}^{-1}$  3278, 3024, 2931, 2861, 1598, 1492, 1320, 1159, 1093, 1055.
- HRMS calcd for  $\text{C}_{20}\text{H}_{28}\text{NO}_2\text{SSi}$  ( $\text{M}+\text{H}$ ) $^+$ : 374.1605, found 374.1605.

***N*-((benzyl(cyclopentyl)(methyl)silyl)methyl)-4-methylbenzenesulfonamide (1k)**

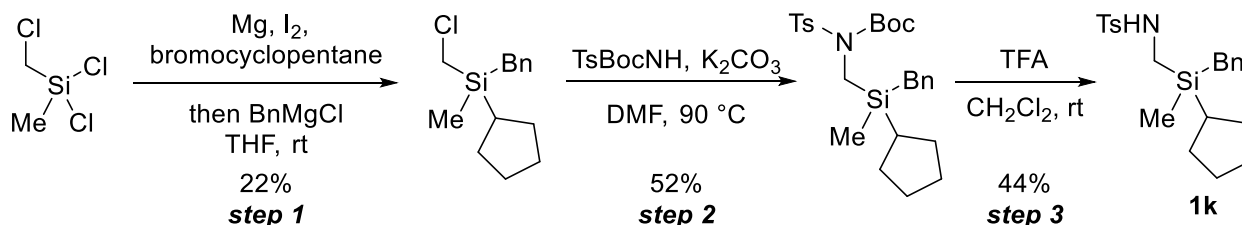

**1k** was prepared according to the procedure as that used for **1j**.

**Step 1:** Magnesium (538 mg, 22.14 mmol, 1.5 equiv.), a grain of  $\text{I}_2$ , bromocyclopentane (2.20 g, 14.76 mmol, 1.0 equiv.), dichloro(chloromethyl)(methyl)silane (2.41 g, 14.76 mmol, 1.0 equiv.), benzyl-magnesium chloride (17.27 mL, 1 M in THF, 1.17 equiv.) in anhydrous THF (40 mL) at room temperature under argon atmosphere overnight gave benzyl(chloromethyl)(cyclopentyl)(methyl)silane as a colorless oil (820 mg, 22%).

**Step 2:** Benzyl(chloromethyl)(cyclopentyl)(methyl)silane (820 mg, 3.24 mmol), TsBocNH (1.32 g, 4.86 mmol, 1.5 equiv.),  $\text{K}_2\text{CO}_3$  (672 mg, 4.86 mmol, 1.5 equiv.) in DMF (10 mL) at 90 °C for 6 h gave *tert*-butyl ((benzyl(cyclopentyl)(methyl)silyl)methyl)(tosyl)carbamate as a colorless oil (821 mg, 52%).

**Step 3:** *Tert*-butyl ((benzyl(cyclopentyl)(methyl)silyl)methyl)(tosyl)carbamate (821 mg, 1.68 mmol), TFA (1.92 g, 16.83 mmol, 10.0 equiv.) in  $\text{CH}_2\text{Cl}_2$  (10 mL) at room temperature for 1 h afforded **1k** as a white solid (287 mg, 44%).

- $R_f$  = 0.5 (EtOAc/Petroleum Ether = 1/4).
- mp: 125.9 – 128.3 °C.
- $^1\text{H}$  NMR (400 MHz,  $\text{CDCl}_3$ )  $\delta$  7.66 (d,  $J$  = 8.0 Hz, 2H), 7.31 (d,  $J$  = 8.0 Hz, 2H), 7.17 (t,  $J$  = 7.2 Hz, 2H), 7.09 (t,  $J$  = 7.2 Hz, 1H), 6.91 (d,  $J$  = 7.2 Hz, 2H), 3.72 (t,  $J$  = 6.4 Hz, 1H), 2.45 (s, 3H), 2.35 – 2.26 (m, 2H), 2.18 – 2.06 (m, 2H), 1.79 – 1.61 (m, 2H), 1.58 – 1.45 (m, 4H), 1.37 – 1.13 (m, 2H), 1.02 – 0.91 (m, 1H), -0.02 (s, 3H).
- $^{13}\text{C}$  NMR (100 MHz,  $\text{CDCl}_3$ )  $\delta$  143.3, 138.8, 135.2, 129.5, 128.6, 127.9, 127.5, 124.6, 29.3, 27.8, 27.7, 26.9, 26.9, 22.5, 22.1, 21.5, -8.0.
- IR (neat)  $\text{cm}^{-1}$  3279, 3024, 2948, 2861, 1598, 1493, 1321, 1157, 1093.
- HRMS calcd for  $\text{C}_{21}\text{H}_{30}\text{NO}_2\text{SSi}$  ( $\text{M}+\text{H}$ ) $^+$ : 388.1761, found 388.1762.

***N*-((benzyl(cyclohexyl)(methyl)silyl)methyl)-4-methylbenzenesulfonamide (1l)**

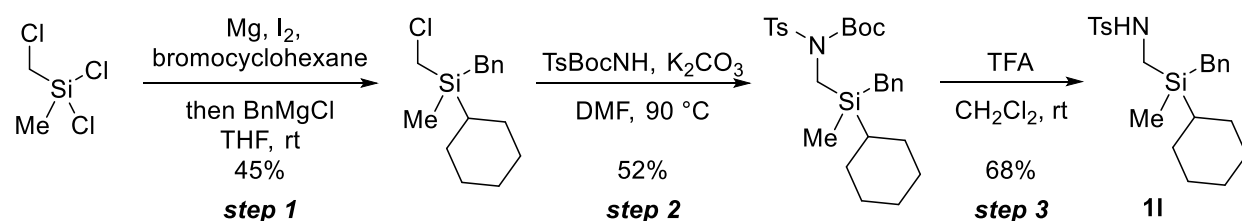

**11** was prepared according to the procedure as that used for **1j**.

**Step 1:** Magnesium (548 mg, 22.54 mmol, 1.5 equiv.), a grain of I<sub>2</sub>, bromocyclohexane (2.45 g, 15.03 mmol, 1.0 equiv.), dichloro(chloromethyl)(methyl)silane (2.46 g, 15.03 mmol, 1.0 equiv.), benzylmagnesium chloride (17.58 mL, 1.0 M in THF, 1.17 equiv.) in anhydrous THF (40 mL) at room temperature under argon atmosphere overnight gave benzyl(chloromethyl)(cyclohexyl)(methyl)silane as a colorless oil (1.79 g, 45%).

**Step 2:** Benzyl(chloromethyl)(cyclohexyl)(methyl)silane (1.79 g, 6.71 mmol), K<sub>2</sub>CO<sub>3</sub> (1.39 g, 10.06 mmol, 1.5 equiv.), TsBocNH (2.73 g, 10.06 mmol, 1.5 equiv.) in DMF (20 mL) at 90 °C for 6 h gave *tert*-butyl ((benzyl(cyclohexyl)(methyl)silyl)methyl)(tosyl)carbamate as a colorless oil (1.75 g, 52%).

**Step 3:** *Tert*-butyl ((benzyl(cyclohexyl)(methyl)silyl)methyl)(tosyl)carbamate (1.75 g, 3.49 mmol), TFA (3.98 g, 34.88 mmol, 10.0 equiv.) in CH<sub>2</sub>Cl<sub>2</sub> (20 mL) at room temperature for 1 h afforded **11** as a white solid (959 mg, 68%).

- R<sub>f</sub> = 0.6 (EtOAc/Petroleum Ether = 1/4).
- mp: 97.7 – 102.0 °C.
- <sup>1</sup>H NMR (400 MHz, CDCl<sub>3</sub>) δ 7.64 (d, *J* = 8.4 Hz, 2H), 7.31 (d, *J* = 7.6 Hz, 2H), 7.17 (t, *J* = 7.2 Hz, 2H), 7.10 (t, *J* = 7.2 Hz, 1H), 6.89 (d, *J* = 7.2 Hz, 2H), 3.58 (t, *J* = 6.4 Hz, 1H), 2.45 (s, 3H), 2.33 – 2.16 (m, 2H), 2.10 (dd, *J* = 20.4, 14.0 Hz, 2H), 1.75 – 1.66 (m, 3H), 1.65 – 1.57 (m, 2H), 1.26 – 1.14 (m, 3H), 1.12 – 1.01 (m, 2H), 0.86 – 0.67 (m, 1H), -0.04 (s, 3H).
- <sup>13</sup>C NMR (100 MHz, CDCl<sub>3</sub>) δ 143.3, 138.8, 135.2, 129.5, 128.6, 127.9, 127.5, 124.6, 28.4, 27.7, 27.7, 27.1, 26.6, 23.0, 21.5, 21.0, -8.2.
- IR (neat) cm<sup>-1</sup> 3278, 2918, 2846, 1598, 1493, 1446, 1321, 1157, 1091.
- HRMS calcd for C<sub>22</sub>H<sub>31</sub>NNaO<sub>2</sub>SSi (M+Na)<sup>+</sup>: 424.1737, found 424.1737.

***N*-((benzyl(methyl)(vinyl)silyl)methyl)-4-methylbenzenesulfonamide (1m)**

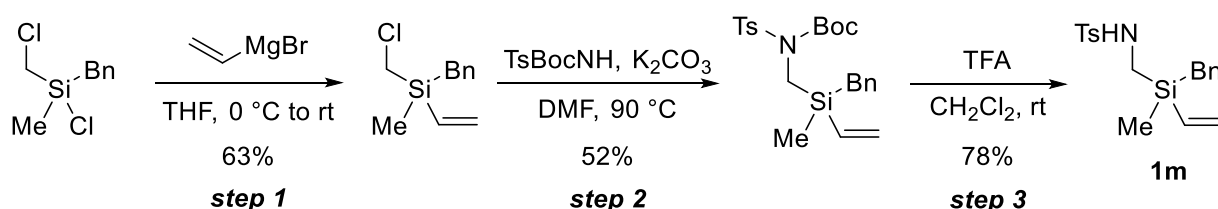

**1m** was prepared according to the procedure as that used for **1e**.

**Step 1:** Benzylchloro(chloromethyl)(methyl)silane (2.00 g, 9.12 mmol), vinylmagnesium bromide (10.04 mL, 1.0 M in THF, 1.0 equiv.) in anhydrous THF (20 mL) at room temperature under argon atmosphere overnight gave benzyl(chloromethyl)(methyl)(vinyl)silane as colorless oil (1.21 g, 63%).

**Step 2:** Benzyl(chloromethyl)(methyl)(vinyl)silane (1.21 g, 5.74 mmol), K<sub>2</sub>CO<sub>3</sub> (1.19 g, 8.61 mmol, 1.5 equiv.), TsBocNH (2.34 g, 8.61 mmol, 1.5 equiv.) in DMF (12 mL) at 90 °C for 6 h gave *tert*-butyl ((benzyl(methyl)(vinyl)silyl)methyl)(tosyl)carbamate as a colorless oil (1.32 g, 52%).

**Step 3:** *Tert*-butyl ((benzyl(methyl)(vinyl)silyl)methyl)(tosyl)carbamate (1.32 g, 3.96 mmol), TFA (3.38 g, 39.62 mmol, 10.0 equiv.) in CH<sub>2</sub>Cl<sub>2</sub> (15 mL) at room temperature for 1 h afforded **1m** as white solid (800 mg, 78%).

- $R_f = 0.7$  (EtOAc/Petroleum Ether = 1/4).
- mp: 107.6 – 110.1 °C.
- $^1\text{H}$  NMR (400 MHz,  $\text{CDCl}_3$ )  $\delta$  7.69 (d,  $J = 8.4$  Hz, 2H), 7.31 (d,  $J = 8.0$  Hz, 2H), 7.18 (t,  $J = 7.2$  Hz, 2H), 7.09 (t,  $J = 7.2$  Hz, 1H), 6.93 (d,  $J = 7.6$  Hz, 2H), 6.14 – 5.94 (m, 2H), 5.73 (dd,  $J = 19.6, 4.0$  Hz, 1H), 4.02 (t,  $J = 6.0$  Hz, 1H), 2.44 (s, 3H), 2.40 – 2.27 (m, 2H), 2.20 (dd,  $J = 18.4, 14.0$  Hz, 2H), 0.09 (s, 3H).
- $^{13}\text{C}$  NMR (100 MHz,  $\text{CDCl}_3$ )  $\delta$  143.4, 138.0, 135.6, 135.2, 133.5, 129.6, 128.5, 128.1, 127.5, 124.7, 29.5, 22.4, 21.5, -6.7.
- IR (neat)  $\text{cm}^{-1}$  3271, 3025, 2956, 2891, 1597, 1406, 1351, 1153, 812.
- HRMS calcd for  $\text{C}_{18}\text{H}_{24}\text{NO}_2\text{SSi}$  ( $\text{M}+\text{H}$ ) $^+$ : 346.1292, found 346.1292.

***N*-((allyl(benzyl)(methyl)silyl)methyl)-4-methylbenzenesulfonamide (1n)**

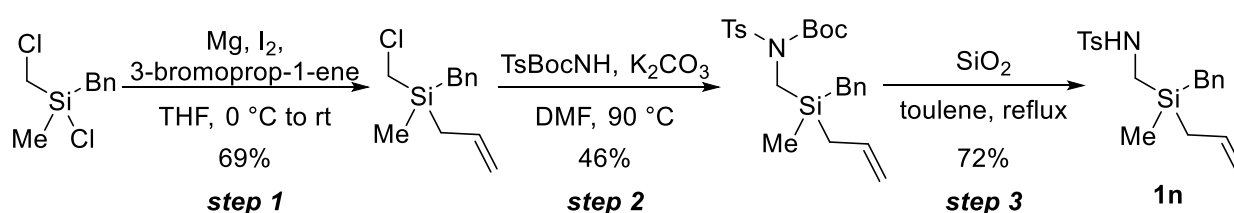

**1n** was prepared according to the procedure as that used for **1h**.

**Step 1:** Magnesium (547 mg, 22.50 mmol, 1.5 equiv.), a grain of  $\text{I}_2$ , 3-bromoprop-1-ene (1.81 g, 15.00 mmol, 1.0 equiv.), benzylchloro(chloromethyl)(methyl)silane (3.29 g, 15.00 mmol, 1.0 equiv.) in anhydrous THF at room temperature for 24 h gave allyl(benzyl)(chloromethyl)(methyl)silane as colorless oil (2.33 g, 69%).

**Step 2:** Allyl(benzyl)(chloromethyl)(methyl)silane (2.33 g, 10.36 mmol), TsBocNH (4.22 g, 15.55 mmol, 1.5 equiv.),  $\text{K}_2\text{CO}_3$  (2.15 g, 15.55 mmol, 1.5 equiv.) in DMF (20 mL) at 90 °C for 6 h gave *tert*-butyl ((allyl(benzyl)(methyl)silyl)methyl)(tosyl)carbamate as a colorless oil (2.19 g, 46%).

**Step 3:** *Tert*-butyl ((allyl(benzyl)(methyl)silyl)methyl)(tosyl)carbamate (2.19 g, 4.76 mmol),  $\text{SiO}_2$  (2.86 g, 47.64 mmol, 10.0 equiv.) in toluene (20 mL) refluxed for 2 h afforded **1n** as a white solid (1.25 g, 72%).

- $R_f = 0.5$  (EtOAc/Petroleum Ether = 1/4).
- mp: 75.5 – 79.5 °C.
- $^1\text{H}$  NMR (400 MHz,  $\text{CDCl}_3$ )  $\delta$  7.69 (d,  $J = 8.4$  Hz, 2H), 7.32 (d,  $J = 8.0$  Hz, 2H), 7.19 (t,  $J = 7.2$  Hz, 2H), 7.10 (t,  $J = 7.2$  Hz, 1H), 6.92 (d,  $J = 7.2$  Hz, 2H), 5.94 – 5.52 (m, 1H), 5.24 – 4.69 (m, 2H), 4.13 (t,  $J = 6.0$  Hz, 1H), 2.44 (s, 3H), 2.31 (d,  $J = 6.0$  Hz, 2H), 2.15 (dd,  $J = 16.8, 14$  Hz, 2H), 1.59 (d,  $J = 8.0$  Hz, 2H), 0.03 (s, 3H).
- $^{13}\text{C}$  NMR (100 MHz,  $\text{CDCl}_3$ )  $\delta$  143.4, 138.2, 135.2, 133.3, 129.6, 128.6, 127.9, 127.5, 124.7, 114.7, 29.4, 22.2, 21.5, 20.0, -6.7.
- IR (neat)  $\text{cm}^{-1}$  3271, 2890, 1598, 1492, 1449, 1316, 1242, 1155, 1054.
- HRMS calcd for  $\text{C}_{19}\text{H}_{25}\text{NNaO}_2\text{SSi}$  ( $\text{M}+\text{Na}$ ) $^+$ : 382.1267, found 382.1266.

***N*-((benzyl(but-3-en-1-yl)(methyl)silyl)methyl)-4-methylbenzenesulfonamide (1o)**

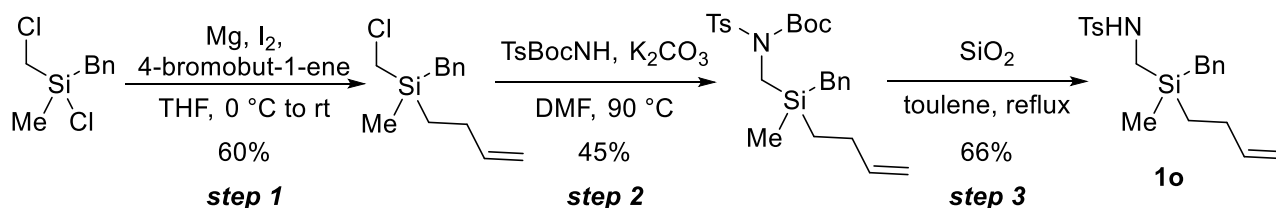

**1o** was prepared according to the procedure as that used for **1h**.

**Step 1:** Magnesium (540 mg, 22.22 mmol, 1.5 equiv.), a grain of I<sub>2</sub>, 4-bromobut-1-ene (2.00 g, 14.81 mmol, 1.0 equiv.), benzylchloro(chloromethyl)(methyl)silane (3.25 g, 14.81 mmol, 1.0 equiv.) in anhydrous THF at room temperature for 24 h gave benzyl(but-3-en-1-yl)(chloromethyl)(methyl)silane as colorless oil (2.12 g, 60%).

**Step 2:** Benzyl(but-3-en-1-yl)(chloromethyl)(methyl)silane (2.12 g, 8.88 mmol), TsBocNH (3.61 g, 13.31 mmol, 1.5 equiv.), K<sub>2</sub>CO<sub>3</sub> (1.84 g, 13.31 mmol, 1.5 equiv.) in DMF (20 mL) at 90 °C for 6 h gave *tert*-butyl ((benzyl(but-3-en-1-yl)(methyl)silyl)methyl)(tosyl)carbamate as a colorless oil (1.89 g, 45%).

**Step 3:** *Tert*-butyl ((benzyl(but-3-en-1-yl)(methyl)silyl)methyl)(tosyl)carbamate (1.89 g, 3.99 mmol), SiO<sub>2</sub> (2.40 g, 39.90 mmol, 10.0 equiv.) in toluene (20 mL) refluxed for 2 h afforded **1o** as a white solid (984.0 mg, 66%).

- R<sub>f</sub> = 0.7 (EtOAc/Petroleum Ether = 1/4).
- mp: 88.9 – 94.6 °C.
- <sup>1</sup>H NMR (400 MHz, CDCl<sub>3</sub>) δ 7.68 (d, *J* = 8.0 Hz, 2H), 7.32 (d, *J* = 8.0 Hz, 2H), 7.18 (t, *J* = 7.2 Hz, 2H), 7.09 (t, *J* = 7.2 Hz, 1H), 6.91 (d, *J* = 7.2 Hz, 2H), 5.92 – 5.68 (m, 1H), 5.05 – 4.81 (m, 2H), 3.90 (t, *J* = 6.0 Hz, 1H), 2.45 (s, 3H), 2.29 (d, *J* = 6.4 Hz, 2H), 2.13 (s, 2H), 2.08 – 1.89 (m, 2H), 0.91 – 0.43 (m, 2H), 0.03 (s, 3H).
- <sup>13</sup>C NMR (100 MHz, CDCl<sub>3</sub>) δ 143.4, 140.5, 138.5, 135.2, 129.6, 128.6, 127.9, 127.5, 124.7, 113.6, 29.7, 27.3, 22.8, 21.5, 11.2, -6.3.
- IR (neat) cm<sup>-1</sup> 3277, 3025, 2917, 1639, 1598, 1493, 1409, 1320, 1157, 1093, 812.
- HRMS calcd for C<sub>20</sub>H<sub>28</sub>NO<sub>2</sub>SSi (M+H)<sup>+</sup>: 374.1605, found 374.1606.

***N*-((benzyl(methyl)(phenyl)silyl)methyl)-4-methylbenzenesulfonamide (1p)**

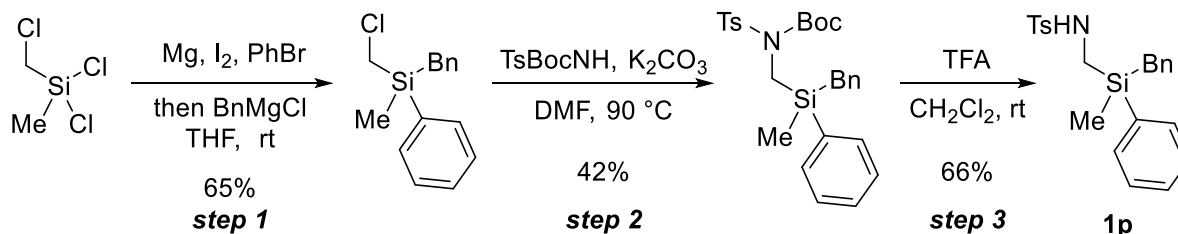

**1p** was prepared according to the procedure as that used for **1j**.

**Step 1:** Magnesium (548 mg, 22.55 mmol, 1.5 equiv.), a grain of I<sub>2</sub>, bromobenzene (2.36 g, 15.03 mmol, 1.0 equiv.), dichloro(chloromethyl)(methyl)silane (2.46 g, 15.03 mmol, 1.0 equiv.), benzylmagnesium chloride (17.59 mL, 1 M in THF, 1.17 equiv.) in anhydrous THF (40 mL) at room

temperature under argon atmosphere overnight gave benzyl(chloromethyl)(methyl)(phenyl)silane as a colorless oil (2.55 g, 65%).

**Step 2:** Benzyl(chloromethyl)(methyl)(phenyl)silane (2.55 g, 9.78 mmol), TsBocNH (3.98 g, 14.66 mmol, 1.5 equiv.), K<sub>2</sub>CO<sub>3</sub> (2.03 g, 14.66 mmol, 1.5 equiv.) in DMF (25 mL) at 90 °C for 6 h gave *tert*-butyl ((benzyl(methyl)(phenyl)silyl)methyl)(tosyl)carbamate as a colorless oil (2.04 g, 42%).

**Step 3:** *Tert*-butyl ((benzyl(methyl)(phenyl)silyl)methyl)(tosyl)carbamate (2.04 g, 4.12 mmol), TFA (4.69 g, 41.15 mmol, 10.0 equiv.) in CH<sub>2</sub>Cl<sub>2</sub> (20 mL) at room temperature for 1 h afforded **1p** as a white solid (1.07 g, 66%).

- R<sub>f</sub> = 0.6 (EtOAc/Petroleum Ether = 1/4).
- mp: 111.6 – 113.7 °C.
- <sup>1</sup>H NMR (400 MHz, CDCl<sub>3</sub>) δ 7.64 (d, *J* = 8.0 Hz, 2H), 7.45 – 7.32 (m, 5H), 7.30 (d, *J* = 8.0 Hz, 2H), 7.17 (t, *J* = 7.2 Hz, 2H), 7.10 (t, *J* = 7.2 Hz, 1H), 6.90 (d, *J* = 7.2 Hz, 2H), 3.87 (t, *J* = 6.4 Hz, 1H), 2.61 – 2.46 (m, 2H), 2.45 (s, 3H), 2.38 (dd, *J* = 26.4, 14.0 Hz, 2H), 0.28 (s, 3H).
- <sup>13</sup>C NMR (100 MHz, CDCl<sub>3</sub>) δ 143.4, 137.8, 135.1, 134.0, 133.6, 130.1, 129.6, 128.5, 128.3, 128.2, 127.5, 124.8, 29.7, 22.6, 21.5, -6.4.
- IR (neat) cm<sup>-1</sup> 3277, 3024, 2922, 1598, 1492, 1450, 1320, 1113, 1092.
- HRMS calcd for C<sub>22</sub>H<sub>25</sub>NNaO<sub>2</sub>SSi (M+Na)<sup>+</sup>: 418.1267, found 418.1267.

***N*-((benzyl(methyl)(*p*-tolyl)silyl)methyl)-4-methylbenzenesulfonamide (1q)**

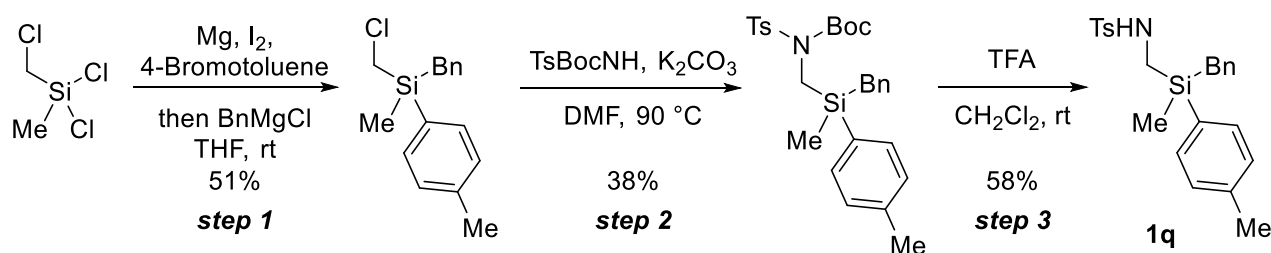

**1q** was prepared according to the procedure as that used for **1j**.

**Step 1:** Magnesium (546 mg, 22.45 mmol, 1.5 equiv.), a grain of I<sub>2</sub>, 4-Bromotoluene (2.56 g, 14.97 mmol, 1.0 equiv.), dichloro(chloromethyl)(methyl)silane (2.45 g, 14.97 mmol, 1.0 equiv.), benzylmagnesium chloride (17.51 mL, 1 M in THF, 1.17 equiv.) in anhydrous THF (40 mL) at room temperature under argon atmosphere overnight gave benzyl(chloromethyl)(methyl)(*p*-tolyl)silane as a colorless oil (2.11 g, 51%).

**Step 2:** Benzyl(chloromethyl)(methyl)(*p*-tolyl)silane (2.11 g, 7.68 mmol), TsBocNH (2.50 g, 9.21 mmol, 1.5 equiv.), K<sub>2</sub>CO<sub>3</sub> (1.27 g, 9.21 mmol, 1.5 equiv.) in DMF (20 mL) at 90 °C for 6 h gave *tert*-butyl ((benzyl(methyl)(*p*-tolyl)silyl)methyl)(tosyl)carbamate as a colorless oil (1.48 g, 38%).

**Step 3:** *Tert*-butyl ((benzyl(methyl)(*p*-tolyl)silyl)methyl)(tosyl)carbamate (1.48 g, 2.90 mmol), TFA (3.31 g, 29.03 mmol, 10.0 equiv.) in CH<sub>2</sub>Cl<sub>2</sub> (15 mL) at room temperature for 1 h afforded **1q** as a white solid (690 mg, 58%).

- R<sub>f</sub> = 0.6 (EtOAc/Petroleum Ether = 1/4).
- mp: 120.6 – 122.9 °C.

- <sup>1</sup>H NMR (400 MHz, CDCl<sub>3</sub>) δ 7.64 (d, *J* = 8.4 Hz, 2H), 7.30 (d, *J* = 8.4 Hz, 2H), 7.27 (d, *J* = 8.4 Hz, 2H), 7.20 – 7.13 (m, 4H), 7.09 (t, *J* = 7.2 Hz, 1H), 6.90 (d, *J* = 7.2 Hz, 2H), 3.78 (t, *J* = 6.0 Hz, 1H), 2.52 – 2.30 (m, 10H), 0.25 (s, 3H).
- <sup>13</sup>C NMR (100 MHz, CDCl<sub>3</sub>) δ 143.4, 140.2, 137.9, 135.1, 134.0, 129.8, 129.5, 129.1, 128.5, 128.2, 127.5, 124.7, 29.8, 22.7, 21.5, 21.5, -6.4.
- IR (neat) cm<sup>-1</sup> 3277, 3024, 2920, 1599, 1493, 1449, 1320, 1250, 1157, 1093.
- HRMS calcd for C<sub>23</sub>H<sub>27</sub>NNaO<sub>2</sub>SSi (M+Na)<sup>+</sup>: 432.1424, found 432.1424.

***N*-((([1,1'-biphenyl]-4-yl(benzyl)(methyl)silyl)methyl)-4-methylbenzenesulfonamide (1r)**

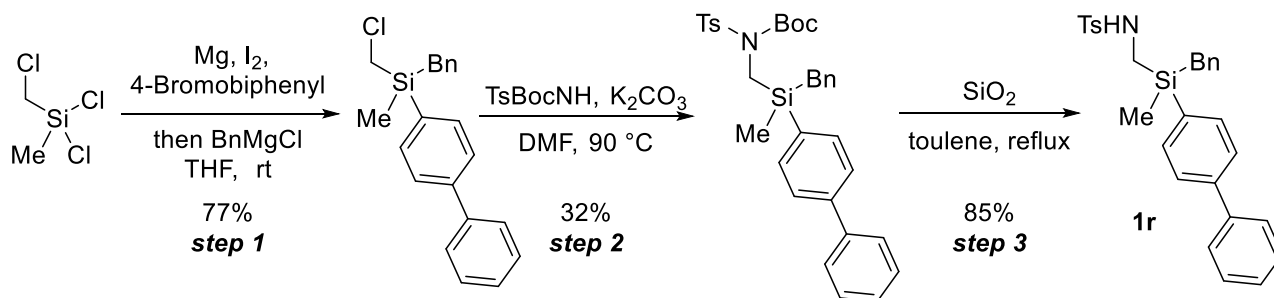

**1r** was prepared according to the procedure as that used for **1j** and **1h**.

**Step 1:** Magnesium (547 mg, 22.52 mmol, 1.5 equiv.), a grain of I<sub>2</sub>, 4-Bromobiphenyl (3.50 g, 15.01 mmol, 1.0 equiv.), dichloro(chloromethyl)(methyl)silane (2.45 g, 15.01 mmol, 1.0 equiv.) and benzylmagnesium chloride (17.57 mL, 1.0 M in THF, 1.17 equiv.) in anhydrous THF at room temperature for 24 h gave [1,1'-biphenyl]-4-yl(benzyl)(chloromethyl)(methyl)silane as a white solid (3.93 g, 77%).

**Step 2:** [1,1'-biphenyl]-4-yl(benzyl)(chloromethyl)(methyl)silane (3.93 g, 11.66 mmol), TsBocNH (4.75 g, 17.50 mmol, 1.5 equiv.), K<sub>2</sub>CO<sub>3</sub> (2.42 g, 17.50 mmol, 1.5 equiv.) in DMF (40 mL) at 90 °C for 6 h gave *tert*-butyl (([1,1'-biphenyl]-4-yl(benzyl)(methyl)silyl)methyl)(tosyl)carbamate as a white solid (2.14 g, 32%).

**Step 3:** *Tert*-butyl (([1,1'-biphenyl]-4-yl(benzyl)(methyl)silyl)methyl)(tosyl)carbamate (2.14 g, 3.74 mmol), SiO<sub>2</sub> (2.25 g, 37.43 mmol, 10.0 equiv.) in toluene (20 mL) refluxed for 2 h afforded **1r** as white solid (1.52 g, 85%).

- R<sub>f</sub> = 0.5 (EtOAc/Petroleum Ether = 1/4).
- mp: 93.1 – 97.4 °C.
- <sup>1</sup>H NMR (400 MHz, CDCl<sub>3</sub>) δ 7.66 (d, *J* = 8.0 Hz, 2H), 7.59 (t, *J* = 7.6 Hz, 4H), 7.50 – 7.43 (m, 4H), 7.38 (t, *J* = 7.2 Hz, 1H), 7.30 (d, *J* = 8.0 Hz, 2H), 7.18 (t, *J* = 7.2 Hz, 2H), 7.11 (t, *J* = 7.2 Hz, 1H), 6.93 (d, *J* = 7.2 Hz, 2H), 3.87 (t, *J* = 6.0 Hz, 1H), 2.59 – 2.46 (m, 2H), 2.48 – 2.33 (m, 5H), 0.31 (s, 3H).
- <sup>13</sup>C NMR (100 MHz, CDCl<sub>3</sub>) δ 143.4, 142.9, 140.6, 137.8, 135.1, 134.5, 132.2, 129.6, 128.9, 128.6, 128.2, 127.7, 127.5, 127.1, 126.9, 124.8, 29.8, 22.7, 21.5, -6.3.
- IR (neat) cm<sup>-1</sup> 3281, 3025, 2922, 1597, 1492, 1320, 1158, 1117, 1092, 813.
- HRMS calcd for C<sub>28</sub>H<sub>29</sub>NNaO<sub>2</sub>SSi (M+Na)<sup>+</sup>: 494.1580, found 494.1597.

### *N*-((benzyl(4-chlorophenyl)(methyl)silyl)methyl)-4-methylbenzenesulfonamide (1s)

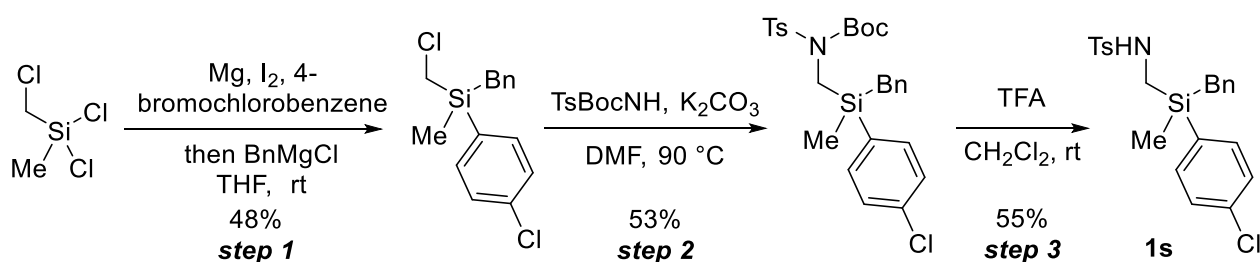

**1s** was prepared according to the procedure as that used for **1j**.

**Step 1:** Magnesium (547 mg, 22.49 mmol, 1.5 equiv.), a grain of I<sub>2</sub>, 4-Bromochlorobenzene (2.87 g, 14.99 mmol, 1.0 equiv.), dichloro(chloromethyl)(methyl)silane (2.45 g, 14.99 mmol, 1.0 equiv.), benzylmagnesium chloride (17.54 mL, 1 M in THF, 1.17 equiv.) in anhydrous THF (40 mL) at room temperature under argon atmosphere overnight to give benzyl(chloromethyl)(4-chlorophenyl)(methyl)silane as a colorless oil (2.12 g, 48%).

**Step 2:** Benzyl(chloromethyl)(4-chlorophenyl)(methyl)silane (2.12 g, 9.09 mmol), TsBocNH (3.70 g, 13.64 mmol, 1.5 equiv.) and K<sub>2</sub>CO<sub>3</sub> (1.88 g, 13.64 mmol, 1.5 equiv.) in DMF (20 mL) at 90 °C for 6 h gave *tert*-butyl ((benzyl(4-chlorophenyl)(methyl)silyl)methyl)(tosyl)carbamate as a colorless oil (2.55 g, 53%).

**Step 3:** *Tert*-butyl ((benzyl(4-chlorophenyl)(methyl)silyl)methyl)(tosyl)carbamate (2.55 g, 4.81 mmol) and TFA (5.48 g, 48.1 mmol, 10.0 equiv.) in CH<sub>2</sub>Cl<sub>2</sub> (25 mL) at room temperature for 1 h afforded **1s** as a white solid (1.14 g, 55%).

- R<sub>f</sub> = 0.6 (EtOAc/Petroleum Ether = 1/4).
- mp: 127.4 – 130.2 °C.
- <sup>1</sup>H NMR (400 MHz, CDCl<sub>3</sub>) δ 7.63 (d, *J* = 8.4 Hz, 2H), 7.35 – 7.26 (m, 6H), 7.16 (t, *J* = 7.2 Hz, 2H), 7.10 (t, *J* = 7.2 Hz, 1H), 6.87 (d, *J* = 6.8 Hz, 2H), 3.81 (t, *J* = 6.4 Hz, 1H), 2.55 – 2.46 (m, 2H), 2.45 (s, 3H), 2.38 (dd, *J* = 22.8, 14.0 Hz, 2H), 0.28 (s, 3H).
- <sup>13</sup>C NMR (100 MHz, CDCl<sub>3</sub>) δ 143.5, 137.4, 136.6, 135.3, 135.1, 131.9, 129.6, 128.6, 128.5, 128.2, 127.5, 124.9, 29.7, 22.7, 21.5, -6.4.
- IR (neat) cm<sup>-1</sup> 3277, 3060, 2923, 1598, 1576, 1491, 1321, 1242, 1158, 1084.
- HRMS calcd for C<sub>22</sub>H<sub>25</sub>ClNO<sub>2</sub>SSi (M+Na)<sup>+</sup>: 452.0878, found 452.0879.

### *N*-((benzyl(4-fluorophenyl)(methyl)silyl)methyl)-4-methylbenzenesulfonamide (1t)

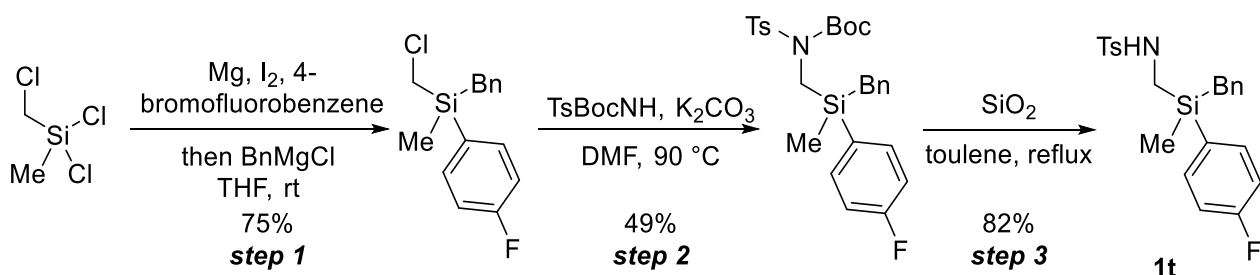

**1t** was prepared according to the procedure as that used for **1r**.



**Step 1:** Magnesium (542 mg, 22.29 mmol, 1.5 equiv.), a grain of I<sub>2</sub>, 4-Bromofluorobenzene (2.60 g, 14.86 mmol, 1.0 equiv.), dichloro(chloromethyl)(methyl)silane (2.43 g, 14.86 mmol, 1.0 equiv.) and benzylmagnesium chloride (17.38 mL, 1.0 M in THF, 1.17 equiv.) in anhydrous THF at room temperature for 24 h gave benzyl(chloromethyl)(4-fluorophenyl)(methyl)silane as colorless oil (3.09 g, 75%).

**Step 2:** Benzyl(chloromethyl)(4-fluorophenyl)(methyl)silane (3.09 g, 11.08 mmol), TsBocNH (4.51 g, 16.62 mmol, 1.5 equiv.), K<sub>2</sub>CO<sub>3</sub> (2.30 g, 16.62 mmol, 1.5 equiv.) in DMF (30 mL) at 90 °C for 6 h gave *tert*-butyl ((benzyl(4-fluorophenyl)(methyl)silyl)methyl)(tosyl)carbamate as a colorless oil (2.80 g, 49%).

**Step 3:** *Tert*-butyl ((benzyl(4-fluorophenyl)(methyl)silyl)methyl)(tosyl)carbamate (2.80 g, 5.45 mmol) and SiO<sub>2</sub> (3.27 g, 54.51 mmol, 10.0 equiv.) in toluene (30 mL) refluxed for 2 h afforded **1t** as white solid (1.85 g, 82%).

- R<sub>f</sub> = 0.6 (EtOAc/Petroleum Ether = 1/4).
- mp: 103.2 – 106.2 °C.
- <sup>1</sup>H NMR (400 MHz, CDCl<sub>3</sub>) δ 7.64 (d, *J* = 8.2 Hz, 2H), 7.34 (dd, *J* = 8.4, 6.2 Hz, 2H), 7.30 (d, *J* = 8.0 Hz, 2H), 7.16 (t, *J* = 7.2 Hz, 2H), 7.16 (t, *J* = 7.2 Hz, 1H), 7.04 (t, *J* = 8.8 Hz, 2H), 6.87 (d, *J* = 7.1 Hz, 2H), 3.88 (t, *J* = 6.2 Hz, 1H), 2.49 (dd, *J* = 6.2, 1.8 Hz, 2H), 2.45 (s, 3H), 2.37 (dd, *J* = 23.6, 14.0 Hz, 2H), 0.27 (s, 3H).
- <sup>13</sup>C NMR (100 MHz, CDCl<sub>3</sub>) δ 164.2 (d, *J* = 250.2 Hz), 143.5, 137.6, 136.1, 136.0, 135.1, 129.6, 129.1 (d, *J* = 3.9 Hz), 128.6, 128.2, 127.5, 124.9, 115.6, 115.4, 29.8, 22.8, 21.5, -6.3.
- IR (neat) cm<sup>-1</sup> 3277, 1588, 1497, 1451, 1322, 1160, 1105, 814.
- HRMS calcd for C<sub>22</sub>H<sub>24</sub>FNNaO<sub>2</sub>SSi (M+Na)<sup>+</sup>: 436.1173, found 436.1171.

***N*-((benzo[*d*][1,3]dioxol-5-yl(benzyl)(methyl)silyl)methyl)-4-methylbenzenesulfonamide (1u)**

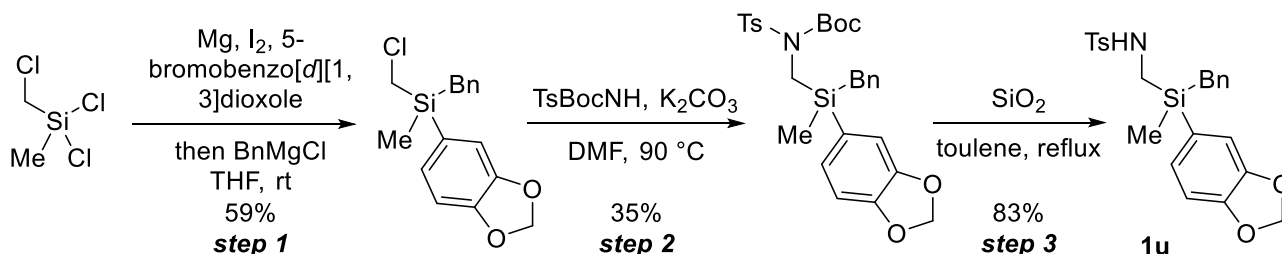

**1u** was prepared according to the procedure as that used for **1r**.

**Step 1:** Magnesium (544 mg, 22.39 mmol, 1.5 equiv.), a grain of I<sub>2</sub>, 5-bromobenzo[*d*][1,3]dioxole (3.00 g, 14.92 mmol, 1.0 equiv.), dichloro(chloromethyl)(methyl)silane (2.44 g, 14.92 mmol, 1.0 equiv.) and benzylmagnesium chloride (17.46 mL, 1.0 M in THF, 1.17 equiv.) in anhydrous THF (40 mL) at room temperature for 24 h gave benzo[*d*][1,3]dioxol-5-yl(benzyl)(chloromethyl)(methyl)silane as a colorless oil (2.68 g, 59%).

**Step 2:** Benzo[*d*][1,3]dioxol-5-yl(benzyl)(chloromethyl)(methyl)silane (2.68 g, 8.79 mmol), TsBocNH (3.58 g, 13.19 mmol, 1.5 equiv.) and K<sub>2</sub>CO<sub>3</sub> (1.82 g, 13.19 mmol, 1.5 equiv.) in DMF (30 mL) at 90 °C for 6 h gave *tert*-butyl ((benzo[*d*][1,3]dioxol-5-yl(benzyl)(methyl)silyl)methyl)(tosyl)carbamate as a colorless oil (1.66 g, 35%).

**Step 3:** *Tert*-butyl ((benzo[*d*][1,3]dioxol-5-yl(benzyl)(methyl)silyl)methyl)(tosyl)carbamate (1.66 g, 3.08 mmol) and SiO<sub>2</sub> (3.51 g, 30.76 mmol, 10.0 equiv.) in toluene (15 mL) refluxed for 2 h afforded **1u** as white solid (1.12 g, 83%).

- R<sub>f</sub> = 0.4 (EtOAc/Petroleum Ether = 1/4).
- mp: 146.7 – 149.1 °C.
- <sup>1</sup>H NMR (400 MHz, CDCl<sub>3</sub>) δ 7.64 (d, *J* = 8.4 Hz, 2H), 7.30 (d, *J* = 8.0 Hz, 2H), 7.17 (t, *J* = 7.2 Hz, 2H), 7.09 (t, *J* = 7.2 Hz, 1H), 6.89 (d, *J* = 7.2 Hz, 2H), 6.86 – 6.80 (m, 2H), 6.78 (s, 1H), 5.97 (s, 2H), 3.80 (t, *J* = 6.0 Hz, 1H), 2.50 – 2.40 (m, 5H), 2.35 (dd, *J* = 24.0, 14.0 Hz, 2H), 0.24 (s, 3H).
- <sup>13</sup>C NMR (100 MHz, CDCl<sub>3</sub>) δ 149.3, 147.8, 143.4, 137.8, 135.1, 129.6, 128.6, 128.3, 128.2, 127.5, 126.2, 124.8, 113.1, 109.0, 100.8, 29.8, 22.9, 21.5, -6.2.
- IR (neat) cm<sup>-1</sup> 3277, 3023, 2891, 1598, 1483, 1417, 1320, 1233, 1157, 751.
- HRMS calcd for C<sub>23</sub>H<sub>25</sub>NNaO<sub>4</sub>SSi (M+Na)<sup>+</sup>: 462.1166, found 462.1166.

***N*-((benzyl(methyl)(naphthalen-2-yl)silyl)methyl)-4-methylbenzenesulfonamide (1v)**

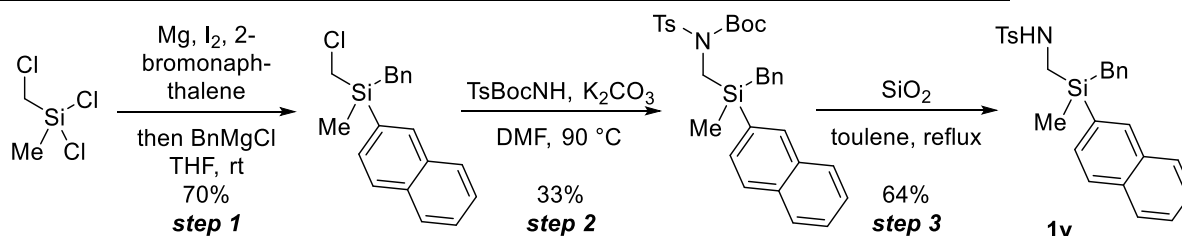

**1v** was prepared according to the procedure as that used for **1r**.

**Step 1:** Magnesium (528 mg, 21.73 mmol, 1.5 equiv.), a grain of I<sub>2</sub>, 2-bromonaphthalene (3.00 g, 14.49 mmol, 1.0 equiv.), dichloro(chloromethyl)(methyl)silane (2.37 g, 14.49 mmol, 1.0 equiv.) and benzylmagnesium chloride (16.95 mL, 1.0 M in THF, 1.17 equiv.) in anhydrous THF (40 mL) at room temperature for 24 h gave benzyl(chloromethyl)(methyl)(naphthalen-2-yl)silane as a white solid (3.15 g, 70%).

**Step 2:** Benzyl(chloromethyl)(methyl)(naphthalen-2-yl)silane (3.15 g, 10.13 mmol), TsBocNH (4.12 g, 15.20 mmol, 1.5 equiv.) and K<sub>2</sub>CO<sub>3</sub> (2.10 g, 15.20 mmol, 1.5 equiv.) in DMF (30 mL) at 90 °C for 6 h gave *tert*-butyl ((benzyl(methyl)(naphthalen-2-yl)silyl)methyl)(tosyl)carbamate as a white solid (1.82 g, 33%).

**Step 3:** *Tert*-butyl ((benzyl(methyl)(naphthalen-2-yl)silyl)methyl)(tosyl)carbamate (1.82 g, 3.33 mmol) and SiO<sub>2</sub> (3.80 g, 33.35 mmol, 10.0 equiv.) in toluene (20 mL) refluxed for 2 h afforded **1v** as white solid (954 mg, 64%).

- R<sub>f</sub> = 0.6 (EtOAc/Petroleum Ether = 1/4).
- mp: 107.6 – 113.0 °C.
- <sup>1</sup>H NMR (400 MHz, CDCl<sub>3</sub>) δ 7.88 (s, 1H), 7.85 – 7.76 (m, 3H), 7.63 (d, *J* = 8.4 Hz, 2H), 7.59 – 7.47 (m, 2H), 7.41 (dd, *J* = 8.4, 1.6 Hz, 1H), 7.26 (d, *J* = 7.2 Hz, 2H), 7.17 (t, *J* = 7.2 Hz, 2H), 7.10 (t, *J* = 7.2 Hz, 1H), 6.93 (d, *J* = 6.8 Hz, 2H), 3.94 (t, *J* = 6.0 Hz, 1H), 2.66 – 2.54 (m, 2H), 2.50 (dd, *J* = 34.4, 14.0 Hz, 2H), 2.43 (s, 3H), 0.37 (s, 3H).
- <sup>13</sup>C NMR (100 MHz, CDCl<sub>3</sub>) δ 143.4, 137.8, 135.2, 135.1, 134.0, 132.8, 130.9, 129.6, 129.5, 128.6, 128.2, 128.1, 127.7, 127.6, 127.5, 127.0, 126.3, 124.8, 29.8, 22.7, 21.5, -6.4.

- IR (neat)  $\text{cm}^{-1}$  3276, 3053, 2922, 1598, 1493, 1321, 1158, 1088, 812.
- HRMS calcd for  $\text{C}_{26}\text{H}_{27}\text{NNaO}_2\text{SSi}$  ( $\text{M}+\text{Na}$ )<sup>+</sup>: 468.1424, found 468.1396.

***N-((1-benzylsilinan-1-yl)methyl)-4-methylbenzenesulfonamide (1w)***

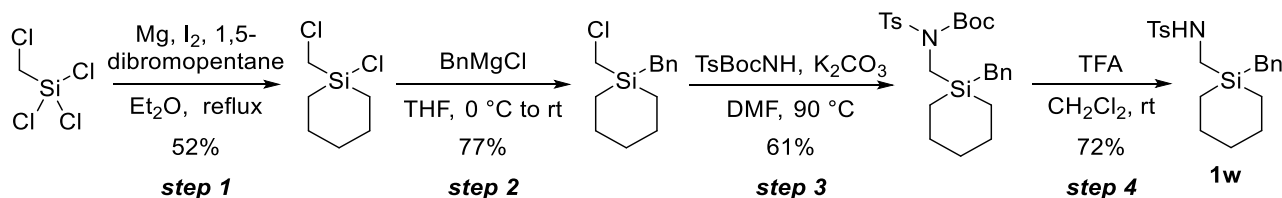

**Step 1:** 1-chloro-1-(chloromethyl)silane was prepared according to literature<sup>1</sup>. To a suspension of magnesium (2.55 g, 105.03 mmol, 3.0 equiv.) and a grain of  $\text{I}_2$  in anhydrous  $\text{Et}_2\text{O}$  (7 mL) was added a small amount (about 20 drops) solution of the 1,5-dibromopentane in  $\text{Et}_2\text{O}$  by syringe at ambient temperature under argon atmosphere. The reaction was initiated and heated to reflux with addition the rest of the 1,5-dibromopentane solution (8.05 g, 35.01 mmol, 1.0 equiv. in 20 mL  $\text{Et}_2\text{O}$ ) dropwise over 30 min. The resulting mixture was refluxed for additional 1 h then cooled to room temperature within 1 h. The resulting Grignard reagent solution, which was separated from residual magnesium turnings by decantation, was added dropwise within 90 min to a solution of trichloro(chloromethyl)silane (6.44 g, 35.01 mmol, 1.0 equiv.) in anhydrous  $\text{Et}_2\text{O}$  (20 mL) under argon atmosphere. After addition was completed, the mixture was stirred for 24 h at room temperature. The reaction was concentrated under reduced pressure, causing a precipitation. The precipitate was separated by decantation and washed with *n*-hexane (3 × 30 ml), and all organic solutions were combined. The solvent was removed as described above, and the crude product was isolated by distillation in vacuo (b.p.: 80 °C/ 0.8mmHg) to afford the 1-chloro-1-(chloromethyl)silane as a colorless oil (3.36 g, 52%).

**1w** was prepared from 1-chloro-1-(chloromethyl)silane according to the procedure as that used for **1a**.

**Step 2:** 1-chloro-1-(chloromethyl)silane (3.36 g, 18.35 mmol), benzylmagnesium chloride (21.46 mL, 1.0 M in THF, 1.17 equiv.) in anhydrous THF (30 mL) at room temperature under argon overnight gave 1-benzyl-1-(chloromethyl)silane as a colorless oil (3.37 g, 77%).

**Step 3:** 1-benzyl-1-(chloromethyl)silane (3.37 g, 14.11 mmol),  $\text{TsBocNH}$  (5.74 g, 21.17 mmol, 1.5 equiv.),  $\text{K}_2\text{CO}_3$  (2.93 g, 21.17 mmol, 1.5 equiv.) in DMF (30 mL) at 90 °C for 6 h gave *tert*-butyl ((1-benzylsilinan-1-yl)methyl)(tosyl)carbamate as a colorless oil (4.07 g, 61%),

**Step 4:** *Tert*-butyl ((1-benzylsilinan-1-yl)methyl)(tosyl)carbamate (4.07 g, 8.59 mmol), TFA (9.80 g, 85.92 mmol, 10.0 equiv.) in  $\text{CH}_2\text{Cl}_2$  (40 mL) at room temperature for 1 h afforded **1w** as a white solid (2.31 g, 72%).

- $R_f = 0.6$  ( $\text{EtOAc}/\text{Petroleum Ether} = 1/4$ ).
- mp: 101.3 – 105.3 °C.
- $^1\text{H NMR}$  (400 MHz,  $\text{CDCl}_3$ )  $\delta$  7.67 (d,  $J = 8.0$  Hz, 2H), 7.31 (d,  $J = 8.0$  Hz, 2H), 7.17 (t,  $J = 7.6$  Hz, 2H), 7.10 (t,  $J = 7.2$  Hz, 1H), 6.90 (d,  $J = 7.2$  Hz, 2H), 3.83 (t,  $J = 6.0$  Hz, 1H), 2.45 (s, 3H),

1. J. O. Daiß, C. Burschka, R. Tacke, *J. Organomet. Chem.* **2005**, 690, 678.



### 3. Synthesis of Aryne Precursors 2

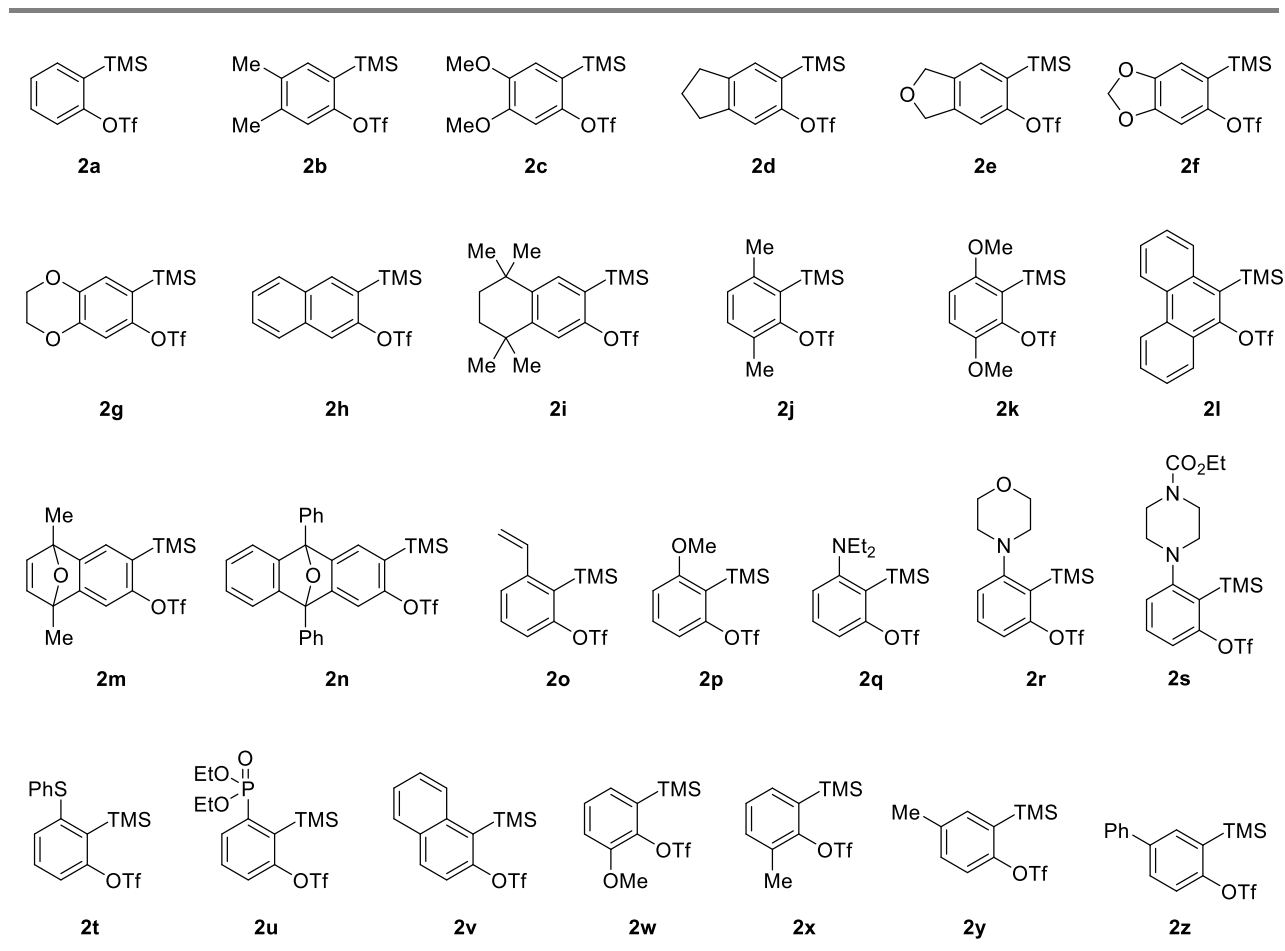

➤ commercially available benzyne precursor:

**2a.**

➤ known benzyne precursors:

**2b, 2c, 2d, 2f, 2h, 2j, 2k, 2l, 2m, 2n, 2p, 2q, 2r, 2t, 2u, 2v, 2w, 2x, 2y, 2z.**

➤ new benzyne precursors:

**2e, 2g, 2i, 2o, 2s.**

#### General Method A:

General Method A was used for preparation of known benzyne precursors **2b, 2c, 2d, 2f, 2h, 2j, 2l, 2p, 2v, 2w, 2x, 2y, 2z.** and new benzyne precursors **2e, 2g, 2i.**

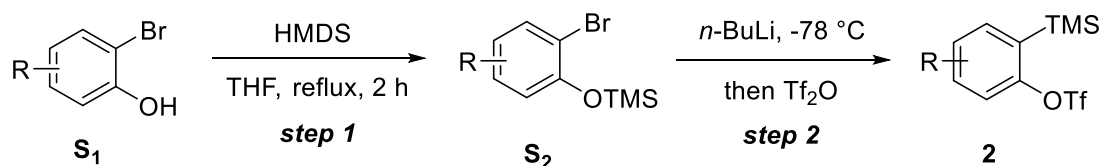

**Step 1:** To a solution of *o*-bromophenol **S**<sub>1</sub> (11.00 mmol) in anhydrous THF (20 mL) was added HMDS (22.00 mmol, 2.0 equiv.) under argon atmosphere. The reaction mixture was refluxed for 2 h. After cooling to room temperature, the crude product **S**<sub>2</sub> was obtained by removing the solvent *in vacuo* and used for the next step without further purification.

**Step 2:** To a solution of the crude product **S**<sub>2</sub> in anhydrous THF (30 mL) was added *n*-BuLi (12.10 mmol, 2.4 M in hexane, 1.1 equiv.) dropwise under argon atmosphere at -78 °C. The mixture was stirred for 1 h at -78 °C before adding Tf<sub>2</sub>O (13.20 mmol, 1.2 equiv.). The reaction was stirred for additional 1 h before quenching with sat. aq. NaHCO<sub>3</sub> at -78 °C. Then the aqueous layer was extracted with Et<sub>2</sub>O (3 × 30 mL). The combined organic layers were dried over Na<sub>2</sub>SO<sub>4</sub> and concentrated under reduced pressure. The crude residue was purified by silica gel flash column chromatography to afford aryne precursors **2**.

#### 4,5-dimethyl-2-(trimethylsilyl)phenyl trifluoromethanesulfonate (2b)

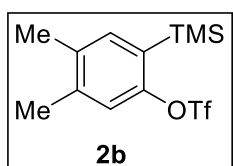

**2b** was prepared according to General Method A, and the NMR spectral data are in accordance with the reported data<sup>2</sup>.

- a colorless oil, 1.90 g, 53%.
- $R_f = 0.8$  (Petroleum Ether).
- <sup>1</sup>H NMR (400 MHz, CDCl<sub>3</sub>) δ 7.23 (s, 1H), 7.09 (s, 1H), 2.28 (s, 3H), 2.26 (s, 3H), 0.34 (s, 9H).
- <sup>13</sup>C NMR (100 MHz, CDCl<sub>3</sub>) δ 153.2, 140.3, 137.0, 136.0, 129.1, 120.5, 118.5 (q,  $J = 317.9$  Hz), 19.9, 19.1, -0.7.

#### 4,5-dimethoxy-2-(trimethylsilyl)phenyl trifluoromethanesulfonate (2c)

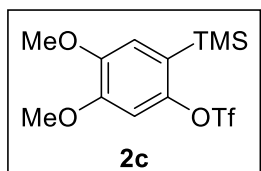

**2c** was prepared according to General Method A, and the NMR spectral data are in accordance with the reported data<sup>2</sup>.

- a colorless oil, 1.18 g, 30%.
- $R_f = 0.6$  (EtOAc/Petroleum Ether = 1/20).
- <sup>1</sup>H NMR (400 MHz, CDCl<sub>3</sub>) δ 6.90 (s, 1H), 6.85 (s, 1H), 3.90 (s, 3H), 3.88 (s, 3H), 0.35 (s, 9H).
- <sup>13</sup>C NMR (100 MHz, CDCl<sub>3</sub>) δ 150.6, 148.2, 147.9, 123.1, 118.5 (q,  $J = 317.9$  Hz), 116.6, 104.2, 104.2, 104.2, 56.1, 56.1, -0.7.

#### 6-(trimethylsilyl)-2,3-dihydro-1H-inden-5-yl trifluoromethanesulfonate (2d)

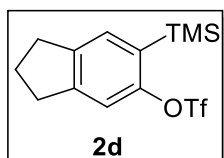

**2d** was prepared according to General Method A, and the NMR spectral data are in accordance with the reported data<sup>2</sup>.

- a colorless oil, 1.68 g, 45%.
- $R_f = 0.8$  (Petroleum Ether).
- <sup>1</sup>H NMR (400 MHz, CDCl<sub>3</sub>) δ 7.37 (s, 1H), 7.21 (s, 1H), 2.94 (m, 4H), 2.14 (m, 2H), 0.38 (s, 9H).
- <sup>13</sup>C NMR (100 MHz, CDCl<sub>3</sub>) δ 153.9, 148.3, 143.6, 131.3, 129.5, 118.5 (q,  $J = 318.1$  Hz), 115.7, 33.1, 32.1, 25.7, -0.7.

#### 6-(trimethylsilyl)-1,3-dihydroisobenzofuran-5-yl trifluoromethanesulfonate (2e)

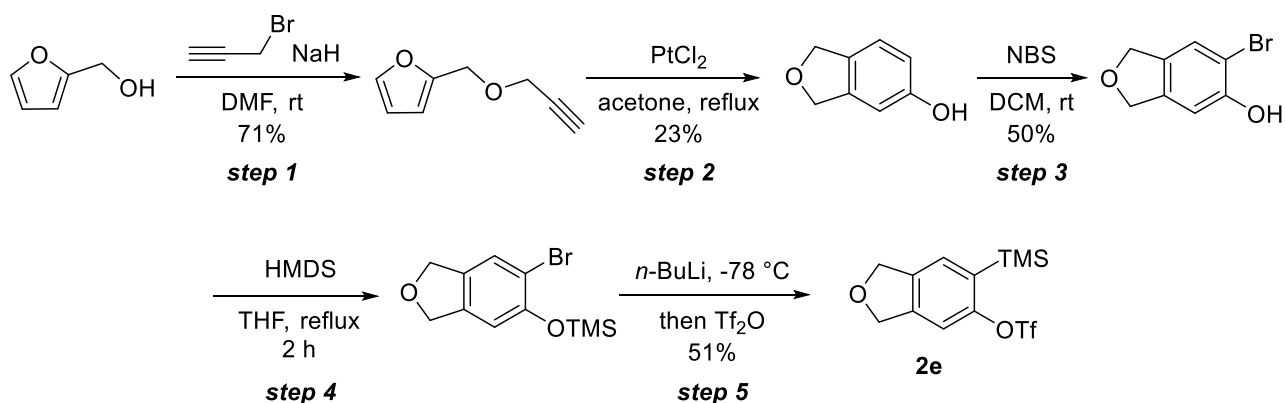

**Step 1:** 2-((prop-2-yn-1-yloxy)methyl)furan was prepared according to the literature<sup>3</sup>. To a suspension of NaH (1.44 g, 35.88 mmol; 60% in mineral oil) in DMF (40 mL) at 0 °C was added furfuryl alcohol (3.20 g, 32.62 mmol) dropwise. After being stirred for 10 min, propargyl bromide (4.27 g, 35.88 mmol, 1.1 equiv.) was added and the mixture was stirred for 4 h at room temperature before quenching with H<sub>2</sub>O and extracting with Et<sub>2</sub>O (3 × 30 mL). The combined organic layers were washed with sat. aq. NaCl, dried over Na<sub>2</sub>SO<sub>4</sub> and concentrated under reduced pressure. The crude residue was purified by silica gel flash column chromatography (eluent: EtOAc/petroleum ether = 1/20) to give the product 2-((prop-2-yn-1-yloxy)methyl)furan as a colorless oil (3.14 g, 71%).

**Step 2:** 1,3-dihydroisobenzofuran-5-ol was prepared according to the literature<sup>3</sup>. To a solution of 2-((prop-2-yn-1-yloxy)methyl)furan (3.14 g, 23.06 mmol) in acetone (30 mL) was added PtCl<sub>2</sub> (306 mg, 1.15 mmol, 5 mol%). The reaction mixture was stirred for 16 h under reflux. The solvent was evaporated and the crude product was purified by silica gel flash column chromatography (eluent: EtOAc/petroleum ether = 1/10) to yield 1,3-dihydroisobenzofuran-5-ol as a pale yellow solid (722 mg, 23 %).

**Step 3:** To a solution of 1,3-dihydroisobenzofuran-5-ol (722 mg, 5.30 mmol) in AcOH (8 mL) was added a solution of bromine (243 μL, 4.74 mmol, 0.9 equiv.) in AcOH (3 mL) dropwise at 0 °C. The reaction mixture was stirred for 30 min at this temperature before quenching with H<sub>2</sub>O and extracting with EtOAc (3 × 20 mL). The combined organic layers were washed with sat. aq. NaCl, dried over Na<sub>2</sub>SO<sub>4</sub> and concentrated under reduced pressure. The crude residue was purified by silica gel flash column chromatography (eluent: EtOAc/petroleum ether = 1/8) to give 6-bromo-1,3-dihydroisobenzofuran-5-ol as a colorless oil (570 mg, 50%).

**2e** was prepared from 6-bromo-1,3-dihydroisobenzofuran-5-ol according to the General Method A.

**Step 4 and 5:** 6-bromo-1,3-dihydroisobenzofuran-5-ol (570 mg, 2.65 mmol), HMDS (855 mg, 5.30 mmol, 2.0 equiv.) refluxed for 2 h; *n*-BuLi (1.21 mL, 2.4 M in hexane, 1.0 equiv.) and Tf<sub>2</sub>O (898 mg, 3.18 mmol, 1.2 equiv) in anhydrous THF at -78 °C for 4 h gave **2e** as a colorless oil (460 mg, 51%).

➤ *R*<sub>f</sub> = 0.5 (EtOAc/Petroleum Ether = 1/10).

➤ <sup>1</sup>H NMR (400 MHz, CDCl<sub>3</sub>) δ 7.37 (s, 1H), 7.22 (s, 1H), 5.11 (d, *J* = 2.4 Hz, 4H), 0.37 (s, 9H).

➤ <sup>13</sup>C NMR (100 MHz, CDCl<sub>3</sub>) δ 154.5, 143.2, 138.5, 131.6, 128.2, 118.4 (q, *J* = 318.1 Hz), 112.6, 112.6, 73.2, 73.0, -0.8.

➤ IR (neat) cm<sup>-1</sup> 2958, 2858, 1472, 1417, 1357, 1257, 1205, 1138, 974.

3. B. Martín-Matute, C. Nevado, D. Cárdenas, A. M. Echavarren, *J. Am. Chem. Soc.* **2003**, *125*, 5757.

➤ HRMS calcd for C<sub>12</sub>H<sub>14</sub>F<sub>3</sub>O<sub>4</sub>SSi (M-H)<sup>+</sup>: 339.0329, found 339.0326.

### 6-(trimethylsilyl)benzo[d][1,3]dioxol-5-yl trifluoromethanesulfonate (2f)

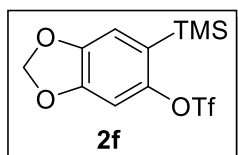

**2f** was prepared according to the General Method A, and the NMR spectral data are in accordance with the reported data<sup>2</sup>.

- a colorless oil, 1.77 g, 47%.
- R<sub>f</sub> = 0.5 (EtOAc/Petroleum Ether = 1/10).
- <sup>1</sup>H NMR (400 MHz, CDCl<sub>3</sub>) δ 6.88 (s, 1H), 6.84 (s, 1H), 6.03 (s, 2H), 0.33 (s, 9H).
- <sup>13</sup>C NMR (100 MHz, CDCl<sub>3</sub>) δ 149.5, 148.6, 146.9, 124.9, 118.5 (q, *J* = 318.1 Hz), 113.2, 102.4, 102.3, 102.3, -0.7.

### 7-(trimethylsilyl)-2,3-dihydrobenzo[b][1,4]dioxin-6-yl trifluoromethanesulfonate (2g)

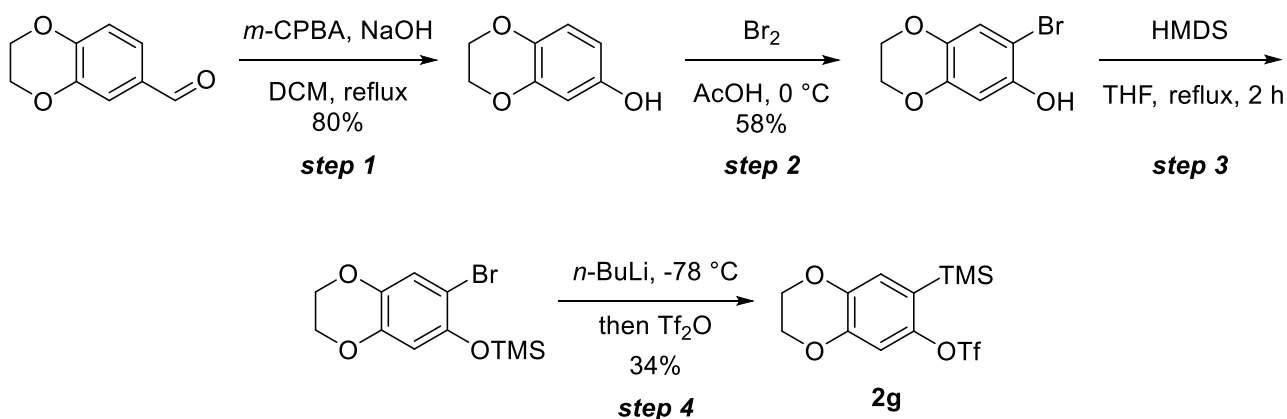

**Step 1:** 6-hydroxy-1,4-benzodioxane was prepared according to the literature<sup>4</sup>. A solution of 1,4-benzodioxan-6-carboxaldehyde (5.00 g, 30.46 mmol) in CH<sub>2</sub>Cl<sub>2</sub> (50 mL) and meta-chloroperoxybenzoic acid (7.88 g, 45.69 mmol, 1.5 equiv.) was heated to 50 °C for 16 h before quenching with sat. aq. NaHCO<sub>3</sub> and extracting with CH<sub>2</sub>Cl<sub>2</sub> (3 × 40 mL). The combined organic layers were concentrated *in vacuo*. The residue was subsequently dissolved in methanol (20 mL), and NaOH (1.46 g, 36.55 mmol) was added to the solution. The resulting mixture was stirred for 2 h, The solution was acidified to pH 7 (1 M HCl) and extracted with CH<sub>2</sub>Cl<sub>2</sub> (3 × 50 mL). The combined organic layers were washed with sat. aq. NaCl, dried over Na<sub>2</sub>SO<sub>4</sub> and concentrated under reduced pressure. The crude residue was purified by silica gel flash column chromatography (eluent: EtOAc/petroleum ether = 1/8) to 6-hydroxy-1,4-benzodioxane as a colorless oil (3.75 g, 80%).

**Step 2:** To a solution of 6-hydroxy-1,4-benzodioxane (3.75 g, 24.61 mmol) in AcOH (35 mL) was added a solution of bromine (1.13 mL, 22.03 mmol, 0.9 equiv.) in AcOH (5 mL) dropwise at 0 °C and the reaction mixture was stirred for 1 h at this temperature before quenching with H<sub>2</sub>O and extracting with EtOAc (3 × 50 mL). The combined organic layers were washed with sat. aq. NaCl, dried over Na<sub>2</sub>SO<sub>4</sub> and concentrated under reduced pressure. The crude residue was purified by silica gel flash column chromatography (eluent: EtOAc/petroleum ether = 1/8) to give 7-bromo-2,3-dihydrobenzo[b][1,4]dioxin-6-ol as a colorless oil (3.29 g, 58%).

4. I. Engelbrecht, J. P. Petzer, A. Petzer, *Bioorg. Med. Chem. Lett.* **2015**, 25, 1896.



**Step 3 and 4:** **2g** was prepared according to the General Method A. 7-bromo-2,3-dihydrobenzo[*b*][1,4]dioxin-6-ol (2.54 g, 11.00 mmol), HMDS (3.55 g, 22.00 mmol, 2.0 equiv.) refluxed for 2 h, then *n*-BuLi (6.54 mL, 2.4 M in hexane, 1.0 equiv) and Tf<sub>2</sub>O (4.83 g, 13.20 mmol, 1.2 equiv) in anhydrous THF at -78 °C for 4 h gave **2g** as a colorless oil (1.73 g, 34%).

- R<sub>f</sub> = 0.4 (EtOAc/Petroleum Ether = 1/20).
- <sup>1</sup>H NMR (400 MHz, CDCl<sub>3</sub>) δ 6.96 (s, 1H), 6.88 (s, 1H), 4.27 (s, 4H), 0.32 (s, 9H).
- <sup>13</sup>C NMR (100 MHz, CDCl<sub>3</sub>) δ 148.0, 144.8, 142.7, 124.7, 123.6, 118.4 (q, *J* = 318.0 Hz), 109.4, 109.4, 109.4, 64.5, 64.2, -0.8.
- IR (neat) cm<sup>-1</sup> 2965, 1610, 1577, 1486, 1415, 1297, 1204, 1138, 1063, 978.
- HRMS calcd for C<sub>12</sub>H<sub>14</sub>F<sub>3</sub>O<sub>5</sub>SSi (M-H)<sup>-</sup>: 355.0289, found 355.0290.

### 3-(trimethylsilyl)naphthalen-2-yl trifluoromethanesulfonate (2h)

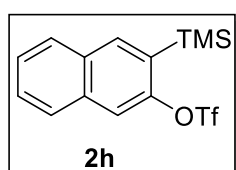

**2h** was prepared according to the General Method A, and the NMR spectral data are in accordance with the reported data<sup>2</sup>.

- a pale yellow oil, 1.57 g, 41%.
- R<sub>f</sub> = 0.6 (Petroleum Ether).
- <sup>1</sup>H NMR (400 MHz, CDCl<sub>3</sub>) δ 8.02 (s, 1H), 7.92 – 7.82 (m, 2H), 7.82 (s, 1H), 7.65 – 7.51 (m, 2H), 0.46 (s, 9H).
- <sup>13</sup>C NMR (100 MHz, CDCl<sub>3</sub>) δ 152.5, 137.5, 134.1, 131.8, 131.0, 127.9, 127.8, 127.7, 126.9, 118.6 (q, *J* = 318.2 Hz), 116.5, 113.8, -0.8.

### 5,5,8,8-tetramethyl-3-(trimethylsilyl)-5,6,7,8-tetrahydronaphthalen-2-yl trifluoromethanesulfonate (2i)

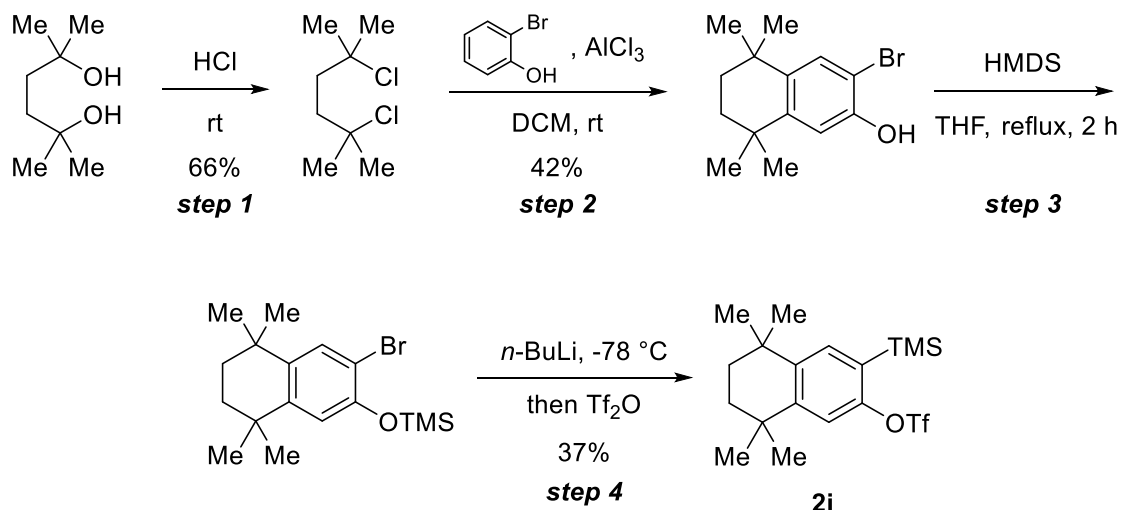

**Step 1:** 2,5-dichloro-2,5-dimethylhexane was prepared according to the literature<sup>5</sup>. 2,5-dimethylhexane-2,5-diol (5.00 g, 34.19 mmol) was dissolved in concentrated hydrochloric acid (50 mL). The white slurry was shaken and stirred for 17 h. The white solid was collected by suction filtration and rinsed with 500 mL of H<sub>2</sub>O. The solid was dissolved in 200 mL of CH<sub>2</sub>Cl<sub>2</sub>, the small water layer was removed. The organic layers were dried over Na<sub>2</sub>SO<sub>4</sub> and concentrated under reduced

5. N. Lamei, A. Foroumadi, S. Emami, M. Amini, A. Shafiee, *Chin. J. Chem.* **2010**, *28*, 1951.

pressure. The white crystalline solid was dried *in vacuo* for 30 min to provide the product 2,5-dichloro-2,5-dimethylhexane (4.13 g, 66%).

**Step 2:** 3-bromo-5,5,8,8-tetramethyl-5,6,7,8-tetrahydronaphthalen-2-ol was prepared according to the literature<sup>6</sup>. To a solution of 2,5-dichloro-2,5-dimethylhexane (4.13 g, 28.24 mmol) in anhydrous CH<sub>2</sub>Cl<sub>2</sub> (40 mL) under argon was added 2-bromophenol (7.33 g, 42.36 mmol) and AlCl<sub>3</sub> (376 mg, 2.82 mmol). The reaction was stirred overnight at room temperature before quenching with H<sub>2</sub>O and extracting with CH<sub>2</sub>Cl<sub>2</sub> (3 × 30 mL). The combined organic layers were washed with sat. aq. NaCl, dried over Na<sub>2</sub>SO<sub>4</sub> and concentrated under reduced pressure. The crude residue was purified by silica gel flash column chromatography (eluent: EtOAc/petroleum ether = 1/100) to give 3-bromo-5,5,8,8-tetramethyl-5,6,7,8-tetrahydronaphthalen-2-ol as a brown solid (3.36 g, 42%).

**2i** was prepared from 3-bromo-5,5,8,8-tetramethyl-5,6,7,8-tetrahydronaphthalen-2-ol according to the General Method A.

**Step 3 and 4:** 3-bromo-5,5,8,8-tetramethyl-5,6,7,8-tetrahydronaphthalen-2-ol (3.12 g, 11.00 mmol), HMDS (3.55 g, 22.00 mmol, 2.0 equiv.) refluxed for 2 h, then *n*-BuLi (5.04 mL, 2.4 M in hexane, 1.0 equiv) and Tf<sub>2</sub>O (3.72 g, 13.20 mmol, 1.2 equiv) in anhydrous THF at -78 °C for 4 h gave **2i** as a white solid (1.66 g, 37%).

- R<sub>f</sub> = 0.4 (EtOAc/Petroleum Ether = 1/20).
- mp: 50.6 – 55.2 °C.
- <sup>1</sup>H NMR (400 MHz, CDCl<sub>3</sub>) δ 7.43 (s, 1H), 7.21 (s, 1H), 1.69 (s, 4H), 1.28 (s, 6H), 1.27 (s, 6H), 0.35 (s, 9H).
- <sup>13</sup>C NMR (100 MHz, CDCl<sub>3</sub>) δ 153.8, 149.5, 144.6, 135.2, 129.4, 119.2 (q, *J* = 318.2 Hz), 117.8, 114.4, 35.4, 35.3, 35.1, 34.7, 32.4, 32.1, -0.1.
- IR (neat) cm<sup>-1</sup> 2961, 1419, 1275, 1260, 1208, 1142, 1090, 971.
- HRMS calcd for C<sub>18</sub>H<sub>28</sub>F<sub>3</sub>O<sub>3</sub>SSi (M+H)<sup>+</sup>: 409.1475, found 409.1473.

### **3,6-dimethyl-2-(trimethylsilyl)phenyl trifluoromethanesulfonate (2j)**

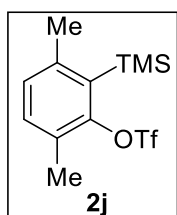

**2j** was prepared according to the General Method A, and the NMR spectral data are in accordance with the reported data<sup>7</sup>.

- a colorless oil, 1.83 g, 51%.
- R<sub>f</sub> = 0.8 (Petroleum Ether).
- <sup>1</sup>H NMR (400 MHz, CDCl<sub>3</sub>) δ 7.17 (d, *J* = 7.6 Hz, 1H), 7.08 (d, *J* = 8.0 Hz, 1H), 2.47 (s, 3H), 2.32 (s, 3H), 0.44 (s, 9H).
- <sup>13</sup>C NMR (100 MHz, CDCl<sub>3</sub>) δ 150.3, 144.3, 133.3, 132.9, 130.5, 128.7, 118.6 (q, *J* = 317.6 Hz), 23.3, 16.8, 1.7.

### **3,6-dimethoxy-2-(trimethylsilyl)phenyl trifluoromethanesulfonate (2k)**

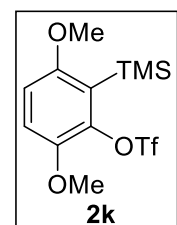

**2k** was prepared according to the literature, and the NMR spectral data are in accordance with the reported data<sup>8</sup>.

6. V. Nahoum, E. Perez, P. Germain, F. Rodriguez-Barrios, F. Manzo, S. Kammerer, G. Lemaire, O. Hirsch, C. A. Royer, H. Gronemeyer, *Proc. Natl. Acad. Sci. U. S. A.* **2007**, *104*, 17323.

7. Y. Wang, A. D. Stretton, M. C. McConnell, P. A. Wood, S. Parsons, J. B. Henry, A. R. Mount, T. H. Galow, *J. Am. Chem. Soc.* **2007**, *129*, 13193.

8. J. George, J. S. Ward, M. S. Sherburn, *Org. Lett.* **2019**, *21*, 7529.

- a white solid, 2.05 g, 52%.
- $R_f = 0.6$  (EtOAc/Petroleum Ether = 1/20).
- $^1\text{H}$  NMR (400 MHz,  $\text{CDCl}_3$ )  $\delta$  6.95 (d,  $J = 7.6$  Hz, 1H), 6.78 (d,  $J = 8.0$  Hz, 1H), 3.80 (s, 3H), 3.77 (s, 3H), 0.38 (s,  $J = 1.0$  Hz, 9H).
- $^{13}\text{C}$  NMR (100 MHz,  $\text{CDCl}_3$ )  $\delta$  158.1, 145.1, 142.6, 123.9, 118.9 (q,  $J = 319.2$  Hz), 114.1, 109.9, 56.1, 55.8, 0.7.

### 10-(trimethylsilyl)phenanthren-9-yl trifluoromethanesulfonate (2l)

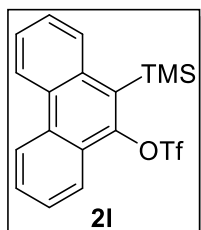

**2l** was prepared according to the General Method A, and the NMR spectral data are in accordance with the reported data<sup>9</sup>.

- a brown solid, 2.45 g, 56%.
- $R_f = 0.3$  (Petroleum Ether).
- $^1\text{H}$  NMR (400 MHz,  $\text{CDCl}_3$ )  $\delta$  8.68 (m,  $J = 8.4, 1.5$  Hz, 2H), 8.25 (dd,  $J = 8.0, 1.6$  Hz, 1H), 8.15 (d,  $J = 6.8$  Hz, 1H), 7.83 – 7.60 (m, 4H), 0.64 (s, 9H).
- $^{13}\text{C}$  NMR (100 MHz,  $\text{CDCl}_3$ )  $\delta$  147.9, 134.6, 132.7, 130.5, 130.0, 129.7, 128.4, 127.3, 127.1, 126.6, 125.8, 123.3, 122.7, 122.2, 118.7 (q,  $J = 320.5$  Hz), 2.2.

### 1,4-dimethyl-7-(trimethylsilyl)-1,4-dihydro-1,4-epoxynaphthalen-6-yl trifluoromethanesulfonate (2m)

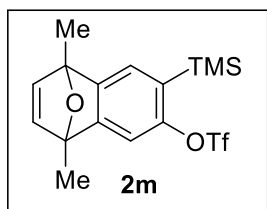

**2m** was prepared according to the literature, and the NMR spectral data are in accordance with the reported data<sup>10</sup>.

- a white solid, 600 mg, 79%.
- $R_f = 0.3$  (EtOAc/Petroleum Ether = 1/10).
- $^1\text{H}$  NMR (400 MHz,  $\text{CDCl}_3$ )  $\delta$  7.17 (s, 1H), 7.08 (s, 1H), 6.78 (q,  $J = 5.2$  Hz, 2H), 1.90 (s, 3H), 1.87 (s, 3H), 0.34 (s, 9H).
- $^{13}\text{C}$  NMR (100 MHz,  $\text{CDCl}_3$ )  $\delta$  157.5, 152.4, 151.6, 146.9, 146.3, 127.9, 124.1, 118.4 (q,  $J = 319.5$  Hz), 111.1, 88.6, 88.5, 15.1, 15.0, -0.7.

### 9,10-diphenyl-3-(trimethylsilyl)-9,10-dihydro-9,10-epoxyanthracen-2-yl trifluoromethanesulfonate (2n)

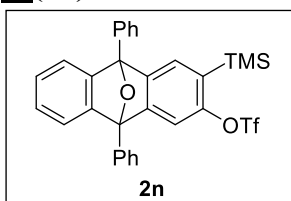

**2n** was prepared according to the literature, and the NMR spectral data are in accordance with the reported data<sup>11</sup>.

- a colorless oil, 690 mg, 63%.
- $R_f = 0.8$  (EtOAc/Petroleum Ether = 1/10).
- $^1\text{H}$  NMR (400 MHz,  $\text{CDCl}_3$ )  $\delta$  7.95 – 7.85 (m, 4H), 7.73 – 7.55 (m, 4H), 7.57 – 7.48 (m, 2H), 7.45 (s, 1H), 7.44 – 7.34 (m, 2H), 7.33 (s, 1H), 7.23 – 7.00 (m, 2H), 0.30 (s, 9H).
- $^{13}\text{C}$  NMR (100 MHz,  $\text{CDCl}_3$ )  $\delta$  154.8, 152.8, 149.7, 149.4, 149.3, 134.2, 133.9, 129.6, 129.0, 128.9, 128.7, 128.6, 126.6, 126.6, 126.5, 126.3, 126.2, 120.9, 120.6, 118.4 (q,  $J = 320.0$  Hz), 112.8, 90.5, 90.4, -0.9.

### 2-(trimethylsilyl)-3-vinylphenyl trifluoromethanesulfonate (2o)

9. P. Diego, P. Dolores, G. Enrique, C. Luis, *Org. Lett.* **1999**, *1*, 1555.

10. T. Ikawa, S. Masuda, A. Takagi, S. Akai, *Chem. Sci.* **2016**, *7*, 5206.

11. a) T. Kitamura, K. Gondo, J. Oyamada, *J. Am. Chem. Soc.* **2017**, *139*, 8416. b) X.-K. Yang, G. C. Tsui, *Chem. Sci.*, **2018**, *9*, 8871.

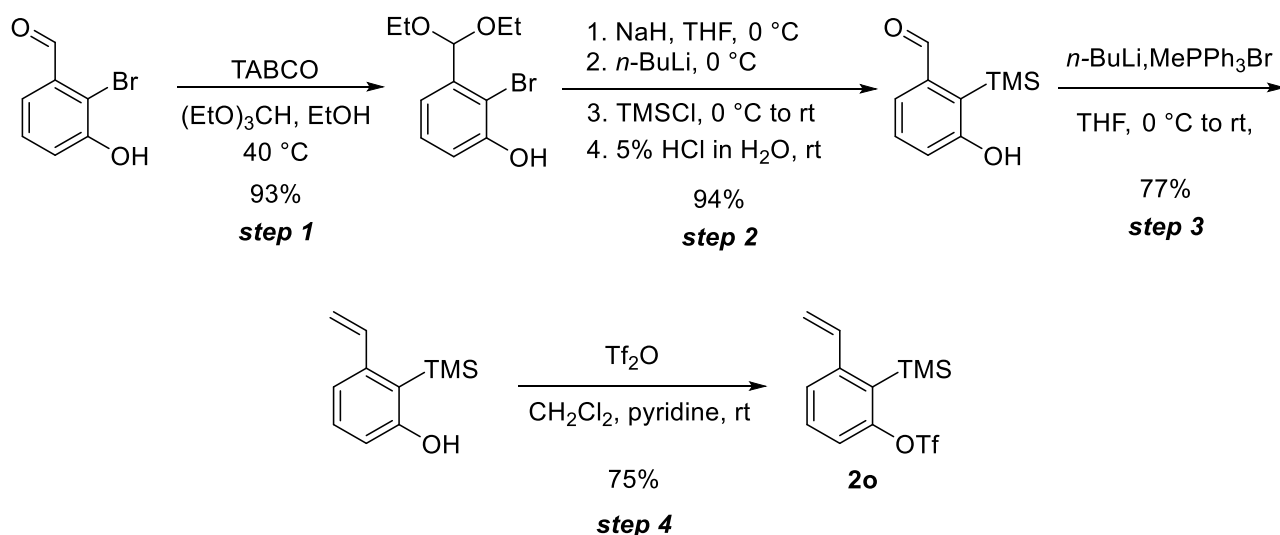

**Step 1:** To a solution of 2-bromo-3-hydroxy benzaldehyde (7.00 g, 34.82 mmol, 1.0 equiv.) in EtOH (80 mL) was added TABCO (1.43 g, 3.48 mmol, 0.1 equiv.) and (EtO)<sub>3</sub>CH (25.80 g, 174.11 mmol, 5.0 equiv.). The reaction was stirred overnight at 40 °C before quenching with sat. aq. NaHCO<sub>3</sub> (30 mL) and extracting with CH<sub>2</sub>Cl<sub>2</sub> (50 mL x 3). The combined organic layers were washed with sat. aq. NaCl, dried over Na<sub>2</sub>SO<sub>4</sub> and concentrated under reduced pressure. The crude residue was purified by silica gel flash column chromatography (eluent: EtOAc/ petroleum ether = 1/10) on triethylamine-buffered silica gel afforded 2-bromo-3-(diethoxymethyl) phenol as a pale yellow oil (9.00 g, 93% yield).

**Step 2:** 3-hydroxy-2-(trimethylsilyl)benzaldehyde was prepared according to the literature<sup>12</sup>. To a solution of NaH (785 mg, 19.63 mmol, 1.2 equiv.) in THF (30 mL) at 0 °C was added a solution of 2-bromo-3-(diethoxymethyl) phenol (4.50 g, 16.36 mmol, 1.0 equiv.) in THF (10 mL). After being stirred for 1 h at 0 °C, *n*-BuLi (8.18 mL, 2.4 M in hexane, 1.2 equiv.) was added dropwise. After stirring 40 min at 0 °C, TMSCl (5.33 g, 49.07 mmol, 3 equiv.) was then added. After the addition was complete, the reaction mixture was warmed to room temperature over 2 h. After being stirred for 2 h, 20 mL of 5 % aqueous HCl was added. A saturated aqueous NaHCO<sub>3</sub> (50 mL) solution was added after 12 h, and the resulting mixture extracted with Et<sub>2</sub>O (50 mL x 3). The combined organic layers were washed with sat. aq. NaCl, dried over Na<sub>2</sub>SO<sub>4</sub> and concentrated under reduced pressure. The crude residue was purified by silica gel flash column chromatography (eluent: EtOAc/ petroleum ether = 1/5) afforded 3-hydroxy-2-(trimethylsilyl)benzaldehyde as a pale yellow solid (3.00 g, 94% yield).

**Step 3:** To a solution of 3-hydroxy-2-(trimethylsilyl)benzaldehyde (3.00 g, 15.44 mmol) in THF (30 mL) was added *n*-BuLi (9.65 mL, 2.4 M in hexane, 1.5 equiv.) dropwise under Ar at 0 °C. After stirring 30 min, methyltriphenylphosphonium bromide (8.27 g, 23.16 mmol, 1.5 equiv.) was added dropwise and the mixture was stirred at room temperature for 5 hours before quenching with H<sub>2</sub>O and extracted with Et<sub>2</sub>O (50 mL x 3). The combined organic layers were washed with sat. aq. NaCl, dried over Na<sub>2</sub>SO<sub>4</sub> and concentrated under reduced pressure. The crude residue was purified by silica gel flash column chromatography (eluent: EtOAc/ petroleum ether = 1/10) to give 2-(trimethylsilyl)-3-vinylphenol as a pale colorless oil (2.28 g, 77% yield).

**Step 4:** To a solution of the resulting 2-(trimethylsilyl)-3-vinylphenol (2.28 g, 11.85 mmol) in CH<sub>2</sub>Cl<sub>2</sub>

(10 mL) at 0 °C was added pyridine (2.81 g, 35.56 mmol, 3.0 equiv.) and Tf<sub>2</sub>O (5.02 g, 17.78 mmol, 1.5 equiv.) dropwise. The reaction was stirred 1h at room temperature before quenching with sat. aq. NH<sub>4</sub>Cl (30 mL) and extracting with CH<sub>2</sub>Cl<sub>2</sub> (30 mL × 3). The combined organic layers were washed with sat. aq. NaCl, dried over Na<sub>2</sub>SO<sub>4</sub> and concentrated under reduced pressure. The crude residue was purified by silica gel flash column chromatography (eluent: Petroleum ether) afforded **2o** as a pale yellow oil (2.89 g, 75% yield).

- R<sub>f</sub> = 0.3 (Petroleum Ether).
- <sup>1</sup>H NMR (400 MHz, CDCl<sub>3</sub>) δ 7.47 (d, *J* = 5.2 Hz, 1H), 7.39 (t, *J* = 5.2 Hz, 1H), 7.23 (d, *J* = 5.6 Hz, 1H), 7.05 (dd, *J* = 11.6, 7.2 Hz, 1H), 5.60 (d, *J* = 11.6 Hz, 1H), 5.36 (d, *J* = 7.2 Hz, 1H), 0.44 (s, 9H).
- <sup>13</sup>C NMR (100 MHz, CDCl<sub>3</sub>) δ 154.9, 147.5, 138.0, 130.7, 126.3, 119.1, 119.1, 118.6 (q, *J* = 320.6 Hz), 117.2, 1.9.
- IR (neat) cm<sup>-1</sup> 3008, 2989, 1550, 1416, 1275, 1240, 1163, 919, 841, 820, 764, 726.
- HRMS calcd for C<sub>12</sub>H<sub>16</sub>F<sub>3</sub>O<sub>3</sub>SSi (M+H)<sup>+</sup>: 325.0536, found 325.0536.

### **3-methoxy-2-(trimethylsilyl)phenyl trifluoromethanesulfonate (2p)**

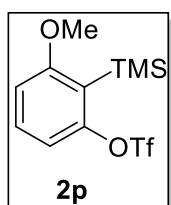

**2p** was prepared according to the General Method A, and the NMR spectral data are in accordance with the reported data<sup>2</sup>.

- a colorless oil, 1.51 g, 33%.
- R<sub>f</sub> = 0.9 (EtOAc/Petroleum Ether = 1/10).
- <sup>1</sup>H NMR (400 MHz, CDCl<sub>3</sub>) δ 7.37 (t, *J* = 8.4 Hz, 1H), 6.95 (d, *J* = 8.0 Hz, 1H), 6.84 (d, *J* = 8.4 Hz, 1H), 3.83 (s, 3H), 0.37 (s, 9H).
- <sup>13</sup>C NMR (100 MHz, CDCl<sub>3</sub>) δ 165.5, 154.7, 131.6, 120.8, 118.6 (q, *J* = 318.8 Hz), 112.8, 109.5, 55.6, 0.7

### **3-(diethylamino)-2-(trimethylsilyl)phenyl trifluoromethanesulfonate (2q)**

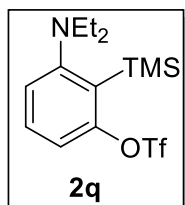

**2q** was prepared according to the literature, and the NMR spectral data are in accordance with the reported data<sup>12</sup>.

- a colorless oil, 482 mg, 66%.
- R<sub>f</sub> = 0.9 (Petroleum Ether).
- <sup>1</sup>H NMR (400 MHz, CDCl<sub>3</sub>) δ 7.33 (t, *J* = 8.4 Hz, 1H), 7.07 (d, *J* = 8.0 Hz, 1H), 7.03 (d, *J* = 8.4 Hz, 1H), 3.02 (q, *J* = 7.2 Hz, 4H), 0.98 (t, *J* = 7.2 Hz, 6H), 0.40 (s, 9H).
- <sup>13</sup>C NMR (100 MHz, CDCl<sub>3</sub>) δ 160.0, 155.9, 130.5, 130.0, 122.3, 118.6 (q, *J* = 318.4 Hz), 115.2, 48.3, 11.1, 1.7.
- IR (neat) cm<sup>-1</sup> 2977, 1592, 1555, 1461, 1275, 1259, 1205, 1138, 1052, 877.
- HRMS calcd for C<sub>14</sub>H<sub>22</sub>F<sub>3</sub>NO<sub>3</sub>SSi (M+H)<sup>+</sup>: 370.1115, found 370.1113.

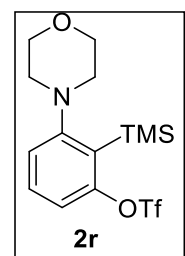

### **3-morpholino-2-(trimethylsilyl)phenyl trifluoromethanesulfonate (2r)**

**2r** was prepared according to the literature, and the NMR spectral data are in accordance with the reported data<sup>13</sup>.

- a colorless oil, 473 mg, 27%.
- R<sub>f</sub> = 0.3 (EtOAc/Petroleum Ether = 1/20).
- <sup>1</sup>H NMR (400 MHz, CDCl<sub>3</sub>) δ 7.44 (t, *J* = 8.0 Hz, 1H), 7.31 (d, *J* = 8.0 Hz, 1H),

- 7.16 (d,  $J = 8.4$  Hz, 1H), 3.85 (s, 4H), 2.88 (s, 4H), 0.41 (s, 9H).
- $^{13}\text{C}$  NMR (100 MHz,  $\text{CDCl}_3$ )  $\delta$  161.8, 154.8, 131.6, 131.4, 122.4, 118.6 (q,  $J = 318.7$  Hz), 118.2, 66.8, 54.6, 2.0.
  - IR (neat)  $\text{cm}^{-1}$  2856, 1592, 1442, 1416, 1259, 1205, 1138, 1114, 1105, 965.
  - HRMS calcd for  $\text{C}_{14}\text{H}_{20}\text{F}_3\text{NO}_4\text{SSi}$  ( $\text{M}+\text{H}$ ) $^+$ : 384.0907, found 384.0909.

**ethyl 4-(3-(((trifluoromethyl)sulfonyl)oxy)-2-(trimethylsilyl)phenyl)piperazine-1-carboxylate (2s)**

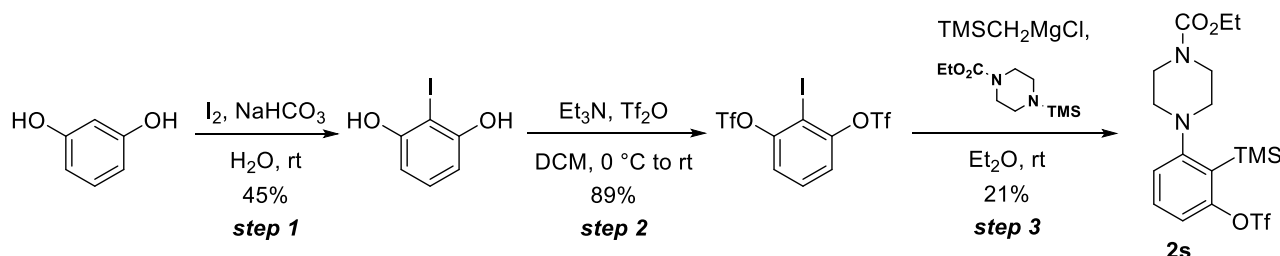

**Step 1:** 2-iodobenzene-1,3-diol was prepared according to the literature<sup>13</sup>. To a solution of resorcinol (5.00 g, 45.41 mmol) in  $\text{H}_2\text{O}$  (50 mL) at 0 °C were added  $\text{I}_2$  (12.56 g, 49.50 mmol, 1.09 equiv.) and  $\text{NaHCO}_3$  (5.44 g, 50.86 mmol, 1.12 equiv.). Once the addition was completed, the reaction was warmed to room temperature and stirred for 16 h. The remaining iodine was quenched with sat. aq.  $\text{Na}_2\text{SO}_3$ . The mixture was extracted with  $\text{EtOAc}$  ( $3 \times 50$  mL). The combined organic layers were concentrated under reduced pressure, The crude residue was purified by silica gel flash column chromatography (eluent:  $\text{EtOAc}$ /petroleum ether = 1/5) to give 2-iodobenzene-1,3-diol as a white solid (4.82 g, 45%).

**Step 2:** 1,3-bis(triflyloxy)-2-iodobenzene was prepared according to the literature<sup>14</sup>. To a solution of 2-iodobenzene-1,3-diol (4.82 g, 20.42 mmol) in anhydrous  $\text{CH}_2\text{Cl}_2$  (50 mL) at 0 °C under argon were added  $\text{Et}_3\text{N}$  (4.55 g, 44.93 mmol, 2.2 equiv.) and  $\text{Tf}_2\text{O}$  (12.68 g, 44.93 mmol, 2.2 equiv.). The reaction was warmed to room temperature and stirred for 2 h before quenching with  $\text{H}_2\text{O}$  and extracting with  $\text{CH}_2\text{Cl}_2$  ( $3 \times 30$  mL). The combined organic layers were washed with sat. aq.  $\text{NaCl}$ , dried over  $\text{Na}_2\text{SO}_4$  and concentrated under reduced pressure. The crude residue was purified by silica gel flash column chromatography (eluent: petroleum ether) to give 1,3-bis(triflyloxy)-2-iodobenzene as a pale yellow solid (9.08 g, 89%).

**Step 3:** To a solution of 1,3-bis(triflyloxy)-2-iodobenzene (1.00 g, 2.00 mmol) and ethyl 4-(trimethylsilyl)piperazine-1-carboxylate<sup>15</sup> (691 mg, 3.00 mmol, 1.5 equiv. in  $\text{Et}_2\text{O}$  10 mL) was slowly added (trimethylsilyl)methylmagnesium chloride (2.60 mL, 1.0 M in  $\text{Et}_2\text{O}$ , 1.3 equiv.) at room temperature. After stirring for 1 h at the same temperature, the reaction was quenched with sat. aq.  $\text{NH}_4\text{Cl}$  and extracted with  $\text{EtOAc}$  ( $3 \times 10$  mL). The combined organic layers were washed with sat. aq.  $\text{NaCl}$ , dried over  $\text{Na}_2\text{SO}_4$  and concentrated under reduced pressure. The crude residue was purified by silica gel flash column chromatography (eluent:  $\text{EtOAc}$ /petroleum ether = 1/20) to give **2s** as a pale yellow oil (191 mg, 21%).

- $R_f = 0.1$  ( $\text{EtOAc}$ /Petroleum Ether = 1/20).

13. S. Meyer, J. Hfliger, M. Schfer, J. J. Molloy, C. G. Daniliuc, R. Gilmour, *Angew. Chem. Int. Ed.* **2021**, *60*, 6430.

14. L. Deng, M.-Q. Chen, G.-B. Dong, *J. Am. Chem. Soc.* **2018**, *140*, 9652.

15. S. H. Kim, B. H. Jin, J. H. Ahn, S. H. Park, S. Y. Choi, D. H. Kim, WO2018105920A1. 2018.

- $^1\text{H}$  NMR (400 MHz,  $\text{CDCl}_3$ )  $\delta$  7.42 (t,  $J = 8.0$  Hz, 1H), 7.25 (d,  $J = 7.6$  Hz, 1H), 7.16 (d,  $J = 8.4$  Hz, 1H), 4.17 (q,  $J = 7.2$  Hz, 2H), 4.11 (s, 2H), 3.14 (s, 2H), 2.84 (s, 4H), 1.28 (t,  $J = 7.2$  Hz, 3H), 0.41 (s, 9H).
- $^{13}\text{C}$  NMR (100 MHz,  $\text{CDCl}_3$ )  $\delta$  161.7, 155.6, 154.7, 131.6, 131.3, 123.4, 120.2, 118.4, 118.6 (q,  $J = 318.8$  Hz), 61.5, 54.1, 43.5, 14.7, 2.0.
- IR (neat)  $\text{cm}^{-1}$  2987, 1698, 1592, 1555, 1417, 1311, 1276, 1259, 1243, 1206.
- HRMS calcd for  $\text{C}_{17}\text{H}_{26}\text{F}_3\text{N}_2\text{O}_5\text{SSi}$  ( $\text{M}+\text{H}$ ) $^+$ : 455.1278, found 455.1277.

### 3-(phenylthio)-2-(trimethylsilyl)phenyl trifluoromethanesulfonate (2t)

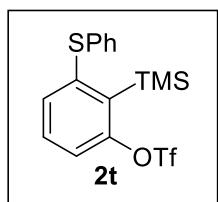

**2t** was prepared according to the literature, and the NMR spectral data are in accordance with the reported data<sup>16</sup>.

- a colorless oil, 1.14 g, 69%.
- $R_f = 0.6$  (Petroleum ether).
- $^1\text{H}$  NMR (400 MHz,  $\text{CDCl}_3$ )  $\delta$  7.36 – 7.06 (m, 8H), 0.53 (s, 9H).
- $^{13}\text{C}$  NMR (100 MHz,  $\text{CDCl}_3$ )  $\delta$  154.7, 145.6, 136.7, 135.2, 133.2, 130.9, 130.4, 129.4, 127.1, 119.2, 118.6 (q,  $J = 320.8$  Hz), 2.1.

### 3-(diethoxyphosphoryl)-2-(trimethylsilyl)phenyl trifluoromethanesulfonate (2u)

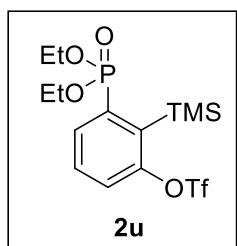

**2u** was prepared according to the literature, and the NMR spectral data are in accordance with the reported data<sup>17</sup>.

- a colorless oil, 2.10 g, 53%.
- $R_f = 0.2$  (EtOAc/ petroleum ether = 1/5).
- $^1\text{H}$  NMR (400 MHz,  $\text{CDCl}_3$ ) 7.92 (dd,  $J = 8.8, 4.8$  Hz, 1H), 7.54 – 7.49 (m, 1H), 7.46 (t,  $J = 6.4$  Hz, 1H), 4.51 – 3.81 (m, 4H), 1.34 (t,  $J = 4.8$  Hz, 6H), 0.51 (s, 9H).
- $^{13}\text{C}$  NMR (100 MHz,  $\text{CDCl}_3$ )  $\delta$  155.6, 155.4, 138.5, 138.4, 138.2, 137.0, 133.1, 133.1, 130.3, 130.2, 123.8, 118.5 (q,  $J = 320.4$  Hz), 62.4, 16.2, 2.2.

### 1-(trimethylsilyl)naphthalen-2-yl trifluoromethanesulfonate (2v)

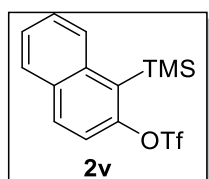

**2v** was prepared according to the General Method A, and the NMR spectral data are in accordance with the reported data<sup>2</sup>.

- a colorless oil, 1.38 g, 36%.
- $R_f = 0.5$  (Petroleum Ether).
- $^1\text{H}$  NMR (400 MHz,  $\text{CDCl}_3$ )  $\delta$  8.23 (d,  $J = 8.4$  Hz, 1H), 7.91 (m, 2H), 7.57 (m, 2H), 7.42 (d,  $J = 8.8$  Hz, 1H), 0.61 (s, 9H).
- $^{13}\text{C}$  NMR (100 MHz,  $\text{CDCl}_3$ )  $\delta$  152.5, 137.5, 132.4, 132.4, 129.3, 129.0, 128.8, 126.7, 126.3, 119.1, 118.7 (q,  $J = 318.7$  Hz), 2.2.

### 2-methoxy-6-(trimethylsilyl)phenyl trifluoromethanesulfonate (2w)

**2w** was prepared according to the General Method A, and the NMR spectral data are in accordance with the reported data<sup>18</sup>.

16. Y. Nakamura, Y. Miyata, K. Uchida, S. Yoshida, T. Hosoya, *Org. Lett.* **2019**, *21*, 5252.

17. B. M. Bembenek, M. M. S. Petersen, J. A. Lilly, A. L. Haugen, N. J. Jiter, A. J. Johnson, E. E. Ripp, S. A. Winchell, A. N. Harvat, C. McNulty, S. A. Thein, A. M. Grieger, B. J. Lyle, G. L. Mraz, A. M. Stitgen, S. Foss, M. L. Schmid, J. D. Scanlon, P. H. Willoughby, *J. Org. Chem.* **2021**, *86*, 10724.

18. J. R. Shi, L. G. Li, C. H. Shan, Z. H. Chen, L. Dai, M. Tan, Y. Lan, Y. Li, *J. Am. Chem. Soc.* **2021**, *143*, 10530.

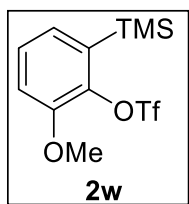

- a colorless oil, 2.24 g, 62%.
- $R_f = 0.2$  (Petroleum Ether).
- $^1\text{H NMR}$  (400 MHz,  $\text{CDCl}_3$ )  $\delta$  7.30 (t,  $J = 8.0$  Hz, 1H), 7.06 (d,  $J = 7.6$  Hz, 1H), 7.02 (d,  $J = 8.0$  Hz, 1H), 3.86 (s, 3H), 0.38 (s, 9H).
- $^{13}\text{C NMR}$  (100 MHz,  $\text{CDCl}_3$ )  $\delta$  150.7, 143.8, 135.7, 129.2, 127.4, 119.5 (q,  $J = 319.4$  Hz), 56.2, 0.1.

### 2-methyl-6-(trimethylsilyl)phenyl trifluoromethanesulfonate (2x)

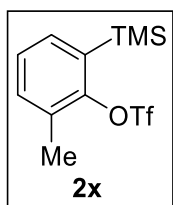

**2x** was prepared according to the General Method A, and the NMR spectral data are in accordance with the reported data<sup>2</sup>.

- a colorless oil, 1.48 g, 43%.
- $R_f = 0.8$  (Petroleum Ether).
- $^1\text{H NMR}$  (400 MHz,  $\text{CDCl}_3$ )  $\delta$  7.31 (s, 1H), 7.22 (s, 2H), 2.37 (s, 3H), 0.37 (s, 9H).
- $^{13}\text{C NMR}$  (100 MHz,  $\text{CDCl}_3$ )  $\delta$  153.1, 137.2, 136.7, 132.2, 131.7, 119.3, 118.5 (q,  $J = 317.9$  Hz), 20.8, -0.8.

### 4-methyl-2-(trimethylsilyl)phenyl trifluoromethanesulfonate (2y)

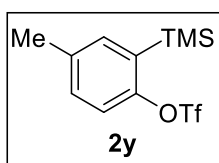

**2y** was prepared according to the General Method A, and the NMR spectral data are in accordance with the reported data<sup>19</sup>.

- a colorless oil, 719 mg, 21%.
- $R_f = 0.8$  (Petroleum Ether).
- $^1\text{H NMR}$  (400 MHz,  $\text{CDCl}_3$ )  $\delta$  7.31 (s, 1H), 7.22 (s, 2H), 2.37 (s, 3H), 0.37 (s, 9H).
- $^{13}\text{C NMR}$  (100 MHz,  $\text{CDCl}_3$ )  $\delta$  153.1, 137.2, 136.7, 132.2, 131.7, 118.5 (q,  $J = 318.1$  Hz) 119.3, 20.8, -0.8.

### 3-(trimethylsilyl)-[1,1'-biphenyl]-4-yl trifluoromethanesulfonate (2z)

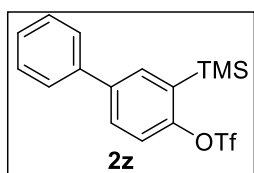

**2z** was prepared according to the General Method A, and the NMR spectral data are in accordance with the reported data<sup>2</sup>.

- a colorless oil, 1.85 g, 45%.
- $R_f = 0.7$  (Petroleum Ether).
- $^1\text{H NMR}$  (400 MHz,  $\text{CDCl}_3$ )  $\delta$  7.70 (d,  $J = 2.4$  Hz, 1H), 7.62 (dd,  $J = 8.4$ , 2.4 Hz, 1H), 7.55 (d,  $J = 7.2$  Hz, 2H), 7.47 (t,  $J = 7.2$  Hz, 2H), 7.41 (m, 2H), 0.42 (s, 9H).
- $^{13}\text{C NMR}$  (100 MHz,  $\text{CDCl}_3$ )  $\delta$  154.6, 140.7, 139.9, 135.1, 133.1, 130.1, 129.1, 128.0, 127.4, 119.9, 118.7 (q,  $J = 317.9$  Hz), -0.7.



## 4. Synthesis of 3-Silaindoline 3

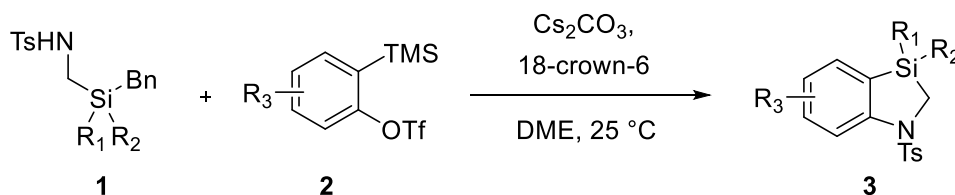

### General Method B:

A mixture of 1,3-N, Si-reagent **1** (100 mg, 1.0 equiv.), aryne precursor **2** (2.5 equiv.), Cs<sub>2</sub>CO<sub>3</sub> (2.5 equiv.) and 18-crown-6 (2.5 equiv.) in DME (1.5 mL) was stirred at 25 °C for 10 h under argon atmosphere. After the reaction was completed, the mixture was quenched with H<sub>2</sub>O and extracted with EtOAc (3 × 10 mL). The combined organic layers were washed with sat. aq. NaCl, dried over Na<sub>2</sub>SO<sub>4</sub> and concentrated under reduced pressure. The crude residue was purified by silica gel flash column chromatography to afford silaindoline **3**.

### 3,3-dimethyl-1-tosyl-2,3-dihydro-1H-benzo[d][1,3]azasilole (3a)

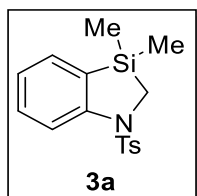

**3a** was prepared according to General Method B. **1a** (100 mg, 0.30 mmol), **2a** (223 mg, 0.75 mmol, 2.5 equiv.), Cs<sub>2</sub>CO<sub>3</sub> (244 mg, 0.75 mmol, 2.5 equiv.) and 18-crown-6 (198 mg, 0.75 mmol, 2.5 equiv.) in DME (1.5 mL) at 25 °C for 10 h afforded **3a** as a white solid (84 mg, 88%).

**Gram-scale synthesis:** **1a** (2.00 g, 6 mmol), **2a** (4.47 g, 15.00 mmol, 2.5 equiv.), Cs<sub>2</sub>CO<sub>3</sub> (4.88 g, 15.00 mmol, 2.5 equiv.) and 18-crown-6 (3.96 g, 15.00 mmol, 2.5 equiv.) in DME (30 mL) at 25 °C for 10 h afforded **3a** as a white solid (1.47 g, 77%).

**Generation from 1b:** **1b** (100 mg, 0.34 mmol), **2a** (255 mg, 0.85 mmol, 2.5 equiv.), Cs<sub>2</sub>CO<sub>3</sub> (279 mg, 0.85 mmol, 2.5 equiv.) and 18-crown-6 (226 mg, 0.85 mmol, 2.5 equiv.) in DME (1.5 mL) at 25 °C for 10 h afforded **3a** as a white solid (21 mg, 19%).

- R<sub>f</sub> = 0.4 (EtOAc/Petroleum Ether = 1/10).
- mp: 121.2 – 127.6 °C.
- <sup>1</sup>H NMR (400 MHz, CDCl<sub>3</sub>) δ 7.85 (d, *J* = 8.4 Hz, 1H), 7.61 (d, *J* = 8.4 Hz, 2H), 7.33 (dd, *J* = 7.2, 0.8 Hz, 1H), 7.28 (ddd, *J* = 8.6, 7.6, 1.6 Hz, 1H), 7.17 (d, *J* = 8.0 Hz, 2H), 6.96 (t, *J* = 7.6 Hz, 1H), 3.12 (s, 2H), 2.31 (s, 3H), 0.16 (s, 6H).
- <sup>13</sup>C NMR (100 MHz, CDCl<sub>3</sub>) δ 150.1, 143.6, 135.2, 132.7, 131.1, 129.5, 127.1, 127.0, 122.9, 117.0, 38.4, 21.5, -2.2.
- <sup>29</sup>Si NMR (400 MHz, CDCl<sub>3</sub>) δ -4.54.
- IR (neat) cm<sup>-1</sup> 1441, 1349, 1260, 1165, 1091, 816, 751.
- HRMS calcd for C<sub>16</sub>H<sub>20</sub>NO<sub>2</sub>SSi (M+H)<sup>+</sup>: 318.0979, found 318.0979.

### 1-(tert-butylsulfonyl)-3,3-dimethyl-2,3-dihydro-1H-benzo[d][1,3]azasilole (3b)

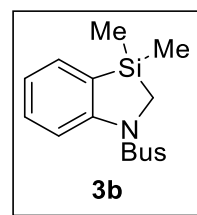

**3b** was prepared according to General Method B. **1c** (100 mg, 0.33 mmol), **2a** (249 mg, 0.83 mmol, 2.5 equiv.), Cs<sub>2</sub>CO<sub>3</sub> (272 mg, 0.83 mmol, 2.5 equiv.) and 18-crown-6 (221 mg, 0.83 mmol, 2.5 equiv.) in DME (1.5 mL) at 25 °C for 10 h afforded **3b** as a pale yellow oil (43 mg, 48%).

- R<sub>f</sub> = 0.4 (EtOAc/Petroleum Ether = 1/10).
- <sup>1</sup>H NMR (400 MHz, CDCl<sub>3</sub>) δ 7.80 (d, *J* = 8.4 Hz, 1H), 7.43 (dd, *J* = 7.2, 1.6

Hz, 1H), 7.29 (ddd,  $J = 8.8, 7.2, 1.6$  Hz, 1H), 6.99 (t,  $J = 7.2$  Hz, 1H), 3.33 (s, 2H), 1.46 (s, 9H), 0.40 (s, 6H).

- $^{13}\text{C}$  NMR (100 MHz,  $\text{CDCl}_3$ )  $\delta$  151.9, 132.6, 130.9, 125.8, 122.1, 116.8, 64.0, 40.8, 25.3, -2.0.
- IR (neat)  $\text{cm}^{-1}$  2923, 1658, 1607, 1586, 1459, 1328, 1130, 1025.
- HRMS calcd for  $\text{C}_{13}\text{H}_{21}\text{NNaO}_2\text{SSi}$  ( $\text{M}+\text{Na}$ ) $^+$ : 306.0954, found 306.0951.

### 3,3,5,6-tetramethyl-1-tosyl-2,3-dihydro-1H-benzo[d][1,3]azasilole (3d)

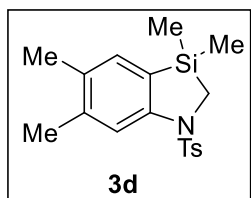

**3d** was prepared according to General Method B. **1a** (100 mg, 0.30 mmol), **2b** (245 mg, 0.75 mmol, 2.5 equiv.),  $\text{Cs}_2\text{CO}_3$  (244 mg, 0.75 mmol, 2.5 equiv.) and 18-crown-6 (198 mg, 0.75 mmol, 2.5 equiv.) in DME (1.5 mL) at 25 °C for 10 h afforded **3d** as a white solid (87 mg, 84%).

- $R_f = 0.3$  (EtOAc/Petroleum Ether = 1/10).
- mp: 119.7 – 125.1 °C.
- $^1\text{H}$  NMR (400 MHz,  $\text{CDCl}_3$ )  $\delta$  7.75 (s, 1H), 7.65 (d,  $J = 8.4$  Hz, 2H), 7.22 (d,  $J = 8.0$  Hz, 2H), 7.14 (s, 1H), 3.14 (s, 2H), 2.36 (s, 3H), 2.28 (s, 3H), 2.20 (s, 3H), 0.18 (s, 6H).
- $^{13}\text{C}$  NMR (100 MHz,  $\text{CDCl}_3$ )  $\delta$  148.6, 143.4, 140.1, 135.1, 133.3, 131.4, 129.4, 127.1, 124.1, 118.3, 38.6, 21.4, 20.6, 19.0, -2.1.
- IR (neat)  $\text{cm}^{-1}$  2920, 1599, 1450, 1386, 1346, 1249, 1163, 1090, 1049, 1000.
- HRMS calcd for  $\text{C}_{18}\text{H}_{24}\text{NO}_2\text{SSi}$  ( $\text{M}+\text{H}$ ) $^+$ : 346.1292, found 346.1290.

### 5,6-dimethoxy-3,3-dimethyl-1-tosyl-2,3-dihydro-1H-benzo[d][1,3]azasilole (3e)

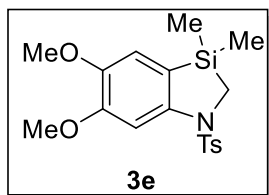

**3e** was prepared according to General Method B. **1a** (100 mg, 0.30 mmol), **2c** (269 mg, 0.75 mmol, 2.5 equiv.),  $\text{Cs}_2\text{CO}_3$  (244 mg, 0.75 mmol, 2.5 equiv.) and 18-crown-6 (198 mg, 0.75 mmol, 2.5 equiv.) in DME (1.5 mL) at 25 °C for 10 h afforded **3e** as a white solid (78 mg, 69%).

- $R_f = 0.3$  (EtOAc/Petroleum Ether = 1/4).
- mp: 170.2 – 175.1 °C.
- $^1\text{H}$  NMR (400 MHz,  $\text{CDCl}_3$ )  $\delta$  7.62 (s, 1H), 7.57 (d,  $J = 8.4$  Hz, 2H), 7.20 (d,  $J = 8.0$  Hz, 2H), 6.78 (s, 1H), 3.93 (s, 3H), 3.85 (s, 3H), 3.13 (s, 2H), 2.36 (s, 3H), 0.11 (s, 6H).
- $^{13}\text{C}$  NMR (100 MHz,  $\text{CDCl}_3$ )  $\delta$  151.4, 145.7, 144.8, 143.6, 134.7, 129.4, 127.2, 117.7, 113.2, 102.6, 56.0, 55.9, 39.0, 21.4, -1.9.
- IR (neat)  $\text{cm}^{-1}$  2956, 1595, 1588, 1491, 1463, 1443, 1386, 1343, 1243, 1162, 1090.
- HRMS calcd for  $\text{C}_{18}\text{H}_{24}\text{NO}_4\text{SSi}$  ( $\text{M}+\text{H}$ ) $^+$ : 378.1190, found 378.1191.

### 3,3-dimethyl-1-tosyl-1,2,3,5,6,7-hexahydroindeno[5,6-d][1,3]azasilole (3f)

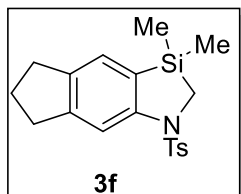

**3f** was prepared according to General Method B. **1a** (100 mg, 0.30 mmol), **2d** (254 mg, 0.75 mmol, 2.5 equiv.),  $\text{Cs}_2\text{CO}_3$  (244 mg, 0.75 mmol, 2.5 equiv.) and 18-crown-6 (198 mg, 0.75 mmol, 2.5 equiv.) in DME (1.5 mL) at 25 °C for 10 h afforded **3f** as a white solid (84 mg, 75%).

- $R_f = 0.4$  (EtOAc/Petroleum Ether = 1/10).
- mp: 108.5 – 113.1 °C.
- $^1\text{H}$  NMR (400 MHz,  $\text{CDCl}_3$ )  $\delta$  7.68 (s, 1H), 7.53 (d,  $J = 8.4$  Hz, 2H), 7.12 – 7.05 (m, 3H), 3.06 (s, 2H), 2.78 (t,  $J = 7.2$  Hz, 2H), 2.69 (t,  $J = 7.2$  Hz, 2H), 2.23 (s, 3H), 1.94 (p,  $J = 7.2$  Hz, 2H), 0.05 (s, 6H).
- $^{13}\text{C}$  NMR (100 MHz,  $\text{CDCl}_3$ )  $\delta$  149.0, 148.4, 143.4, 139.1, 135.2, 129.4, 127.8, 127.1, 124.8, 113.5, 39.0, 33.3, 31.7, 25.6, 21.4, -2.1.

- IR (neat)  $\text{cm}^{-1}$  2938, 2855, 1461, 1436, 1398, 1345, 1305, 1250, 1140, 1090.
- HRMS calcd for  $\text{C}_{19}\text{H}_{24}\text{NO}_2\text{SSi}$  ( $\text{M}+\text{H}$ )<sup>+</sup>: 358.1292, found 358.1290.

### 3,3-dimethyl-1-tosyl-2,3,5,7-tetrahydro-1H-isobenzofuro[5,6-d][1,3]azasilole (3g)

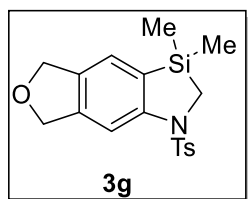

**3g** was prepared according to General Method B. **1a** (100 mg, 0.30 mmol), **2e** (255 mg, 0.75 mmol, 2.5 equiv.),  $\text{Cs}_2\text{CO}_3$  (244 mg, 0.75 mmol, 2.5 equiv.) and 18-crown-6 (198 mg, 0.75 mmol, 2.5 equiv.) in DME (1.5 mL) at 25 °C for 10 h afforded **3g** as a white solid (70 mg, 65%).

- $R_f = 0.1$  (EtOAc/Petroleum Ether = 1/10).
- mp: 150.7 – 153.2 °C.
- $^1\text{H}$  NMR (400 MHz,  $\text{CDCl}_3$ )  $\delta$  7.80 (s, 1H), 7.64 (d,  $J = 8.4$  Hz, 2H), 7.25 (s, 2H), 7.22 (d,  $J = 3.6$  Hz, 1H), 5.08 (s, 2H), 5.03 (s, 2H), 3.21 (s, 2H), 2.37 (s, 3H), 0.20 (s, 6H).
- $^{13}\text{C}$  NMR (100 MHz,  $\text{CDCl}_3$ )  $\delta$  150.0, 143.7, 143.4, 135.0, 134.1, 129.6, 127.1, 126.7, 124.7, 110.0, 73.6, 72.8, 39.1, 21.5, -2.1.
- IR (neat)  $\text{cm}^{-1}$  2850, 1615, 1406, 1347, 1275, 1162, 1132, 1090, 1057.
- HRMS calcd for  $\text{C}_{18}\text{H}_{22}\text{NO}_3\text{SSi}$  ( $\text{M}+\text{H}$ )<sup>+</sup>: 360.1084, found 360.1079.

### 7,7-dimethyl-5-tosyl-6,7-dihydro-5H-[1,3]dioxolo[4',5':4,5]benzo[1,2-d][1,3]azasilole (3h)

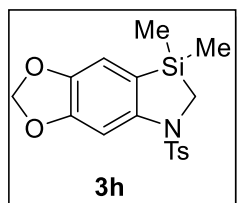

**3h** was prepared according to General Method B. **1a** (100 mg, 0.30 mmol), **2f** (257 mg, 0.75 mmol, 2.5 equiv.),  $\text{Cs}_2\text{CO}_3$  (244 mg, 0.75 mmol, 2.5 equiv.) and 18-crown-6 (198 mg, 0.75 mmol, 2.5 equiv.) in DME (1.5 mL) at 25 °C for 10 h afforded **3h** as a pale yellow solid (70 mg, 74%).

- $R_f = 0.2$  (EtOAc/Petroleum Ether = 1/10).
- mp: 152.4 – 156.1 °C.
- $^1\text{H}$  NMR (400 MHz,  $\text{CDCl}_3$ )  $\delta$  7.60 (d,  $J = 8.4$  Hz, 2H), 7.54 (s, 1H), 7.23 (d,  $J = 8.0$  Hz, 2H), 6.71 (s, 1H), 5.95 (s, 2H), 3.15 (s, 2H), 2.37 (s, 3H), 0.10 (s, 6H).
- $^{13}\text{C}$  NMR (100 MHz,  $\text{CDCl}_3$ )  $\delta$  150.6, 145.5, 144.2, 143.6, 134.7, 129.5, 127.2, 119.2, 109.9, 101.5, 100.8, 39.3, 21.5, -2.0.
- IR (neat)  $\text{cm}^{-1}$  2906, 1599, 1503, 1467, 1435, 1392, 1257, 1159, 1121, 1089, 1036.
- HRMS calcd for  $\text{C}_{17}\text{H}_{19}\text{NNaO}_4\text{SSi}$  ( $\text{M}+\text{Na}$ )<sup>+</sup>: 384.0696, found 384.0695.

### 3,3-dimethyl-1-tosyl-2,3,6,7-tetrahydro-1H-[1,4]dioxino[2',3':4,5]benzo[1,2-d][1,3]azasilole (3i)

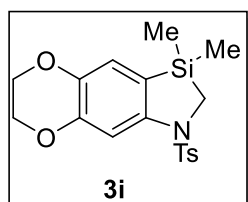

**3i** was prepared according to General Method B. **1a** (100 mg, 0.30 mmol), **2g** (267 mg, 0.75 mmol, 2.5 equiv.),  $\text{Cs}_2\text{CO}_3$  (244 mg, 0.75 mmol, 2.5 equiv.) and 18-crown-6 (198 mg, 0.75 mmol, 2.5 equiv.) in DME (1.5 mL) at 25 °C for 10 h afforded **3i** as a pale yellow solid (55 mg, 49%).

- $R_f = 0.1$  (EtOAc/Petroleum Ether = 1/10).
- mp: 112.0 – 117.1 °C.
- $^1\text{H}$  NMR (400 MHz,  $\text{CDCl}_3$ )  $\delta$  7.65 (d,  $J = 8.4$  Hz, 2H), 7.49 (s, 1H), 7.23 (d,  $J = 8.1$  Hz, 2H), 6.82 (s, 1H), 4.27 – 4.18 (m, 4H), 3.13 (s, 2H), 2.37 (s, 3H), 0.14 (s, 6H).
- $^{13}\text{C}$  NMR (100 MHz,  $\text{CDCl}_3$ )  $\delta$  145.8, 144.3, 143.5, 140.0, 134.9, 129.5, 127.2, 119.9, 119.4, 106.9, 64.5, 64.1, 38.9, 21.5, -2.1.
- IR (neat)  $\text{cm}^{-1}$  2925, 1598, 1568, 1473, 1407, 1345, 1242, 1162, 1090, 1069, 1001.
- HRMS calcd for  $\text{C}_{18}\text{H}_{22}\text{NO}_4\text{SSi}$  ( $\text{M}+\text{H}$ )<sup>+</sup>: 376.1033, found 376.1033.

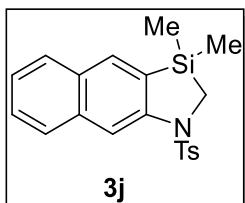

### 3,3-dimethyl-1-tosyl-2,3-dihydro-1H-naphtho[2,3-d][1,3]azasilole (3j)

**3j** was prepared according to General Method B. **1a** (100 mg, 0.30 mmol), **2h** (261 mg, 0.75 mmol, 2.5 equiv.), Cs<sub>2</sub>CO<sub>3</sub> (244 mg, 0.75 mmol, 2.5 equiv.) and 18-crown-6 (198 mg, 0.75 mmol, 2.5 equiv.) in DME (1.5 mL) at 25 °C for 10 h afforded **3j** as a white solid (49 mg, 45%).

➤  $R_f = 0.4$  (EtOAc/Petroleum Ether = 1/10).

- <sup>1</sup>H NMR (400 MHz, CDCl<sub>3</sub>) δ 8.26 (s, 1H), 7.90 (s, 1H), 7.81 (d,  $J = 8.4$  Hz, 1H), 7.73 (d,  $J = 8.4$  Hz, 3H), 7.46 (t,  $J = 7.6$  Hz, 1H), 7.36 (t,  $J = 8.0$  Hz, 1H), 7.20 (d,  $J = 8.4$  Hz, 2H), 3.28 (s, 2H), 2.34 (s, 3H), 0.30 (s, 6H).
- <sup>13</sup>C NMR (100 MHz, CDCl<sub>3</sub>) δ 146.3, 143.7, 135.3, 135.2, 133.7, 129.9, 129.5, 128.4, 128.0, 127.5, 127.2, 127.0, 124.7, 112.9, 38.7, 21.5, -2.3.
- IR (neat) cm<sup>-1</sup> 3052, 2957, 2850, 1591, 1440, 1345, 1263, 1162, 1144, 1089, 1041.
- HRMS calcd for C<sub>20</sub>H<sub>22</sub>NO<sub>2</sub>SSi (M+H)<sup>+</sup>: 368.1135, found 368.1133.

### 3,3,5,5,8,8-hexamethyl-1-tosyl-2,3,5,6,7,8-hexahydro-1H-naphtho[2,3-d][1,3]azasilole (3k)

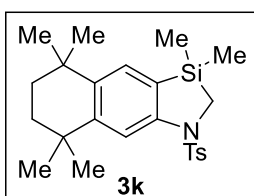

**3k** was prepared according to General Method B. **1a** (100 mg, 0.30 mmol), **2i** (306 mg, 0.75 mmol, 2.5 equiv.), Cs<sub>2</sub>CO<sub>3</sub> (244 mg, 0.75 mmol, 2.5 equiv.) and 18-crown-6 (198 mg, 0.75 mmol, 2.5 equiv.) in DME (1.5 mL) at 25 °C for 10 h afforded **3k** as a white solid (46 mg, 36%).

➤  $R_f = 0.5$  (EtOAc/Petroleum Ether = 1/10).

➤ mp: 197.4 – 201.8 °C.

- <sup>1</sup>H NMR (400 MHz, CDCl<sub>3</sub>) δ 7.78 (s, 1H), 7.71 (d,  $J = 8.4$  Hz, 2H), 7.30 (s, 1H), 7.23 (d,  $J = 8.4$  Hz, 2H), 3.17 (s, 2H), 2.37 (s, 3H), 1.85 – 1.61 (m, 4H), 1.30 (s, 6H), 1.23 (s, 6H), 0.25 (s, 6H).
- <sup>13</sup>C NMR (100 MHz, CDCl<sub>3</sub>) δ 148.3, 147.7, 143.4, 139.4, 135.5, 130.7, 129.4, 127.3, 124.0, 114.2, 38.6, 35.1, 35.0, 34.9, 33.8, 31.9, 31.8, 21.5, -2.0.
- IR (neat) cm<sup>-1</sup> 2956, 2859, 1599, 1472, 1345, 1250, 1056, 1091, 1020, 994.
- HRMS calcd for C<sub>24</sub>H<sub>34</sub>NO<sub>2</sub>SSi (M+H)<sup>+</sup>: 428.2074, found 428.2072.

### 3,3,4,7-tetramethyl-1-tosyl-2,3-dihydro-1H-benzo[d][1,3]azasilole (3l)

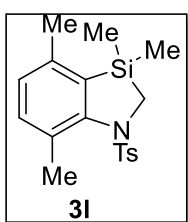

**3l** was prepared according to General Method B. **1a** (100 mg, 0.30 mmol), **2j** (244 mg, 0.75 mmol, 2.5 equiv.), Cs<sub>2</sub>CO<sub>3</sub> (244 mg, 0.75 mmol, 2.5 equiv.) and 18-crown-6 (198 mg, 0.75 mmol, 2.5 equiv.) in DME (1.5 mL) at 25 °C for 10 h afforded **3l** as a white solid (89 mg, 86%).

➤  $R_f = 0.3$  (EtOAc/Petroleum Ether = 1/10).

➤ mp: 98.4 – 103.2 °C.

- <sup>1</sup>H NMR (400 MHz, CDCl<sub>3</sub>) δ 7.42 (d,  $J = 8.0$  Hz, 2H), 7.21 (d,  $J = 8.0$  Hz, 3H), 6.95 (d,  $J = 7.6$  Hz, 1H), 3.11 (s, 2H), 2.54 (s, 3H), 2.38 (s, 3H), 2.28 (s, 3H), -0.10 (s, 6H).
- <sup>13</sup>C NMR (100 MHz, CDCl<sub>3</sub>) δ 149.0, 143.6, 139.8, 134.7, 133.9, 133.3, 131.5, 129.3, 128.5, 126.9, 40.3, 21.7, 21.4, 20.6, -2.8.
- IR (neat) cm<sup>-1</sup> 2922, 1598, 1468, 1348, 1234, 1158, 1089, 1037, 1004.
- HRMS calcd for C<sub>18</sub>H<sub>24</sub>NO<sub>2</sub>SSi (M+H)<sup>+</sup>: 346.1292, found 346.1295.

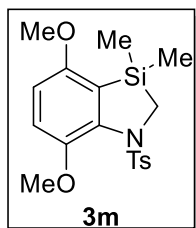

#### 4,7-dimethoxy-3,3-dimethyl-1-tosyl-2,3-dihydro-1H-benzof[d][1,3]azasilole (3m)

**3m** was prepared according to General Method B. **1a** (100 mg, 0.30 mmol), **2k** (268 mg, 0.75 mmol, 2.5 equiv.), Cs<sub>2</sub>CO<sub>3</sub> (244 mg, 0.75 mmol, 2.5 equiv.) and 18-crown-6 (198 mg, 0.75 mmol, 2.5 equiv.) in DME (1.5 mL) at 25 °C for 10 h afforded **3m** as a pale yellow solid (70 mg, 62%).

➤ R<sub>f</sub> = 0.2 (EtOAc/Petroleum Ether = 1/10).

➤ mp: 168.5 – 172.1 °C.

- <sup>1</sup>H NMR (400 MHz, CDCl<sub>3</sub>) δ 7.73 (d, *J* = 8.0 Hz, 2H), 7.27 (d, *J* = 7.2 Hz, 2H), 6.88 (d, *J* = 8.4 Hz, 1H), 6.56 (d, *J* = 8.4 Hz, 1H), 3.75 (s, 3H), 3.63 (s, 3H), 3.37 (s, 2H), 2.41 (s, 3H), 0.26 (s, 6H).
- <sup>13</sup>C NMR (100 MHz, CDCl<sub>3</sub>) δ 157.2, 146.7, 142.6, 140.3, 138.9, 129.1, 127.0, 121.2, 116.8, 107.0, 56.2, 55.7, 41.5, 21.5, -3.2.
- IR (neat) cm<sup>-1</sup> 2955, 2835, 1583, 1481, 1462, 1389, 1331, 1274, 1255, 1153, 1081.
- HRMS calcd for C<sub>18</sub>H<sub>24</sub>NO<sub>4</sub>SSi (M+H)<sup>+</sup>: 378.1190, found 378.1194.

#### 3,3-dimethyl-1-tosyl-2,3-dihydro-1H-phenanthro[9,10-d][1,3]azasilole (3n)

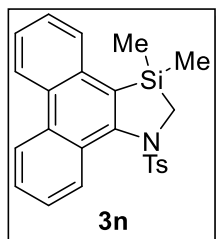

**3n** was prepared according to General Method B. **1a** (100 mg, 0.30 mmol), **2l** (299 mg, 0.75 mmol, 2.5 equiv.), Cs<sub>2</sub>CO<sub>3</sub> (244 mg, 0.75 mmol, 2.5 equiv.) and 18-crown-6 (198 mg, 0.75 mmol, 2.5 equiv.) in DME (1.5 mL) at 25 °C for 10 h afforded **3n** as a pale solid (79 mg, 63%).

➤ R<sub>f</sub> = 0.2 (EtOAc/Petroleum Ether = 1/10).

➤ mp: 180.4 – 184.9 °C.

➤ <sup>1</sup>H NMR (400 MHz, CDCl<sub>3</sub>) δ 8.71 (t, *J* = 8.0 Hz, 2H), 8.66 (d, *J* = 8.0 Hz, 1H), 7.75 – 7.69 (m, 1H), 7.70 – 7.61 (m, 2H), 7.60 – 7.52 (m, 2H), 7.34 (d, *J* = 8.0 Hz, 2H), 7.15 (d, *J* = 8.0 Hz, 2H), 3.39 (s, 2H), 2.35 (s, 3H), -0.02 (s, 6H).

- <sup>13</sup>C NMR (100 MHz, CDCl<sub>3</sub>) δ 148.9, 144.0, 135.9, 133.5, 132.8, 129.8, 129.7, 129.4, 129.1, 128.7, 128.4, 128.3, 127.8, 126.9, 126.3, 125.6, 123.4, 122.3, 40.9, 21.4, -2.1.
- IR (neat) cm<sup>-1</sup> 2923, 1597, 1491, 1447, 1350, 1162, 1088, 987.
- HRMS calcd for C<sub>24</sub>H<sub>24</sub>NO<sub>2</sub>SSi (M+H)<sup>+</sup>: 418.1292, found 418.1292.

#### 3,3,5,8-tetramethyl-1-tosyl-2,3,5,8-tetrahydro-1H-5,8-epoxynaphtho[2,3-d][1,3]azasilole (3o)

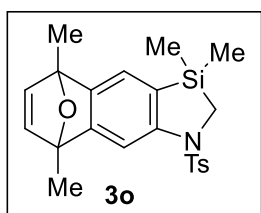

**3o** was prepared according to General Method B. **1a** (100 mg, 0.30 mmol), **2m** (294 mg, 0.75 mmol, 2.5 equiv.), Cs<sub>2</sub>CO<sub>3</sub> (244 mg, 0.75 mmol, 2.5 equiv.) and 18-crown-6 (198 mg, 0.75 mmol, 2.5 equiv.) in DME (1.5 mL) at 25 °C for 10 h afforded **3o** as a white solid (82 mg, 67%).

➤ R<sub>f</sub> = 0.4 (EtOAc/ petroleum ether = 1/4).

➤ mp : 147.6 – 150.3 °C.

- <sup>1</sup>H NMR (400 MHz, CDCl<sub>3</sub>) δ 7.78 (s, 1H), 7.61 (d, *J* = 8.0 Hz, 2H), 7.22 (d, *J* = 8.0 Hz, 2H), 7.05 (s, 1H), 6.75 (s, 2H), 3.47 – 2.97 (m, 2H), 2.37 (s, 3H), 1.89 (s, 3H), 1.86 (s, 3H), 0.17 (s, 3H), 0.12 (s, 3H).
- <sup>13</sup>C NMR (100 MHz, CDCl<sub>3</sub>) δ 157.1, 148.5, 147.2, 146.7, 146.0, 143.6, 135.0, 129.5, 127.1, 122.2, 120.9, 109.8, 88.7, 88.2, 39.2, 21.4, 15.2, 15.2, -2.0, -2.1.
- IR (neat) cm<sup>-1</sup> 3006, 2982, 1449, 1389, 1275, 1260, 764, 750, 708.
- HRMS calcd for C<sub>22</sub>H<sub>26</sub>NO<sub>3</sub>SSi (M+H)<sup>+</sup>: 312.1397, found 312.1392.

### 3,3-dimethyl-5,10-diphenyl-1-tosyl-2,3,5,10-tetrahydro-1H-5,10-epoxyanthra[2,3-d][1,3]azasilole

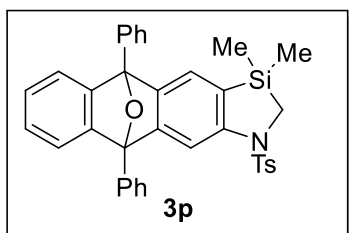

#### **(3p)**

**3p** was prepared according to General Method B. **1a** (100 mg, 0.30 mmol), **2n** (425 mg, 0.75 mmol, 2.5 equiv.), Cs<sub>2</sub>CO<sub>3</sub> (244 mg, 0.75 mmol, 2.5 equiv.) and 18-crown-6 (198 mg, 0.75 mmol, 2.5 equiv.) in DME (1.5 mL) at 25 °C for 10 h afforded **3p** as a white solid (103 mg, 59%).

- R<sub>f</sub> = 0.3 (EtOAc/ petroleum ether = 1/4).
- mp : 233.6 – 235.8 °C.
- <sup>1</sup>H NMR (400 MHz, CDCl<sub>3</sub>) δ 7.95 – 7.87 (m, 4H), 7.84 (s, 1H), 7.69 – 7.45 (m, 8H), 7.43 – 7.30 (m, 2H), 7.26 (s, 1H), 7.10 (d, *J* = 8.0 Hz, 2H), 7.07 – 7.03 (m, 2H), 3.42 – 2.83 (m, 2H), 2.32 (s, 3H), 0.23 (s, 3H), 0.12 (s, 3H).
- <sup>13</sup>C NMR (100 MHz, CDCl<sub>3</sub>) δ 154.4, 150.5, 149.4, 148.7, 144.5, 143.7, 135.1, 135.0, 134.6, 129.5, 128.8, 128.7, 128.4, 128.1, 127.2, 126.9, 126.4, 125.9, 125.9, 123.3, 123.2, 120.7, 120.0, 110.4, 90.6, 90.1, 39.2, 21.4, -2.0, -2.1.
- IR (neat) cm<sup>-1</sup> 2163, 2154, 2018, 1981, 1275, 1260, 1165, 764, 749, 705, 575.
- HRMS calcd for C<sub>36</sub>H<sub>32</sub>NO<sub>3</sub>SSi (M+H)<sup>+</sup>: 586.1867, found 586.1863.

### 3,3-dimethyl-1-tosyl-4-vinyl-2,3-dihydro-1H-benzo[d][1,3]azasilole (3q)

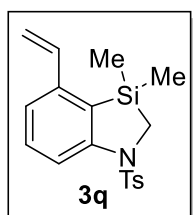

**3q** was prepared according to General Method B. **1a** (100 mg, 0.30 mmol), **2o** (243 mg, 0.75 mmol, 2.5 equiv.), Cs<sub>2</sub>CO<sub>3</sub> (244 mg, 0.75 mmol, 2.5 equiv.) and 18-crown-6 (198 mg, 0.75 mmol, 2.5 equiv.) in DME (1.5 mL) at 25 °C for 10 h afforded **3q** as a pale yellow oil (59 mg, 57%).

- R<sub>f</sub> = 0.3 (EtOAc/Petroleum Ether = 1/10).
- <sup>1</sup>H NMR (400 MHz, CDCl<sub>3</sub>) δ 7.81 (d, *J* = 8.4 Hz, 1H), 7.66 (d, *J* = 8.4 Hz, 1H), 7.32 (t, *J* = 7.6 Hz, 1H), 7.24 – 7.20 (m, 2H), 6.62 (dd, *J* = 17.2, 10.8 Hz, 1H), 5.70 (d, *J* = 17.2 Hz, 1H), 5.28 (d, *J* = 10.8 Hz, 1H), 3.18 (s, 2H), 2.37 (s, 3H), 0.28 (s, 6H).
- <sup>13</sup>C NMR (100 MHz, CDCl<sub>3</sub>) δ 150.5, 143.7, 143.2, 136.8, 135.2, 131.7, 129.6, 127.1, 126.4, 118.9, 116.2, 115.8, 38.3, 21.5, -1.7.
- IR (neat) cm<sup>-1</sup> 3004, 2994, 1561, 1440, 1345, 1275, 1260, 1183, 1089, 808, 764, 749.
- HRMS calcd for C<sub>18</sub>H<sub>22</sub>NO<sub>2</sub>SSi (M+H)<sup>+</sup>: 344.1135, found 344.1134.

### 4-methoxy-3,3-dimethyl-1-tosyl-2,3-dihydro-1H-benzo[d][1,3]azasilole (3r)

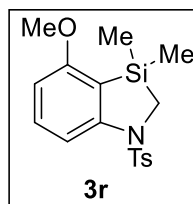

**3r** was prepared according to General Method B. **1a** (100 mg, 0.30 mmol), **2p** or **2w** (246 mg, 0.75 mmol, 2.5 equiv.), Cs<sub>2</sub>CO<sub>3</sub> (244 mg, 0.75 mmol, 2.5 equiv.) and 18-crown-6 (198 mg, 0.75 mmol, 2.5 equiv.) in DME (1.5 mL) at 25 °C for 10 h afforded **3r** as a white solid (64 mg, 62% or 60 mg, 58%).

- R<sub>f</sub> = 0.4 (EtOAc/Petroleum Ether = 1/10).
- mp: 93.6 – 99.6 °C.
- <sup>1</sup>H NMR (400 MHz, CDCl<sub>3</sub>) δ 7.68 (d, *J* = 8.0 Hz, 2H), 7.52 (d, *J* = 8.4 Hz, 1H), 7.29 (t, *J* = 8.4 Hz, 1H), 7.22 (d, *J* = 8.0 Hz, 2H), 6.46 (d, *J* = 8.0 Hz, 1H), 3.76 (s, 3H), 3.13 (s, 2H), 2.36 (s, 3H), 0.25 (s, 6H).
- <sup>13</sup>C NMR (100 MHz, CDCl<sub>3</sub>) δ 163.8, 151.5, 143.5, 135.3, 133.3, 129.5, 127.1, 114.1, 109.8, 103.9, 55.2, 38.9, 21.5, -2.5.
- IR (neat) cm<sup>-1</sup> 2959, 1587, 1461, 1344, 1249, 1160, 1119, 1079, 1032, 981.

- HRMS calcd for C<sub>17</sub>H<sub>22</sub>NO<sub>3</sub>SSi (M+H)<sup>+</sup>: 348.1084, found 348.1084.

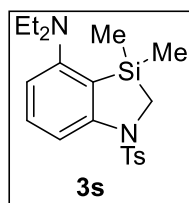

**N,N-diethyl-3,3-dimethyl-1-tosyl-2,3-dihydro-1H-benzod[1,3]azasilol-4-amine (3s)**

**3s** was prepared according to General Method B. **1a** (100 mg, 0.30 mmol), **2q** (277 mg, 0.75 mmol, 2.5 equiv.), Cs<sub>2</sub>CO<sub>3</sub> (244 mg, 0.75 mmol, 2.5 equiv.) and 18-crown-6 (198 mg, 0.75 mmol, 2.5 equiv.) in DME (1.5 mL) at 25 °C for 10 h afforded **3s** as a pale yellow solid (100 mg, 89%).

- R<sub>f</sub> = 0.3 (EtOAc/Petroleum Ether = 1/10).
- mp: 91.7 – 97.4 °C.
- <sup>1</sup>H NMR (400 MHz, CDCl<sub>3</sub>) δ 7.67 (d, *J* = 8.4 Hz, 2H), 7.58 (d, *J* = 8.0 Hz, 1H), 7.27 (t, *J* = 8.0 Hz, 1H), 7.23 (d, *J* = 8.0 Hz, 2H), 6.77 (d, *J* = 7.6 Hz, 1H), 3.10 (s, 2H), 2.91 (q, *J* = 7.2 Hz, 4H), 2.37 (s, 3H), 0.95 (t, *J* = 7.2 Hz, 6H), 0.24 (s, 6H).
- <sup>13</sup>C NMR (100 MHz, CDCl<sub>3</sub>) δ 157.7, 151.4, 143.4, 135.5, 132.1, 129.4, 127.2, 125.7, 116.6, 113.1, 48.4, 38.9, 21.5, 12.6, -1.7.
- IR (neat) cm<sup>-1</sup> 2969, 2929, 1597, 1571, 1455, 1345, 1247, 1160, 1089, 1040.
- HRMS calcd for C<sub>20</sub>H<sub>29</sub>N<sub>2</sub>O<sub>2</sub>SSi (M+H)<sup>+</sup>: 389.1714, found 389.1712.

**4-(3,3-dimethyl-1-tosyl-2,3-dihydro-1H-benzod[1,3]azasilol-4-yl)morpholine (3t)**

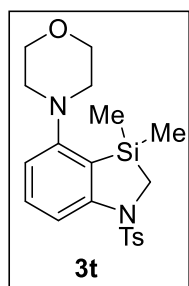

**3t** was prepared according to General Method B. **1a** (100 mg, 0.30 mmol), **2r** (288 mg, 0.75 mmol, 2.5 equiv.), Cs<sub>2</sub>CO<sub>3</sub> (244 mg, 0.75 mmol, 2.5 equiv.) and 18-crown-6 (198 mg, 0.75 mmol, 2.5 equiv.) in DME (1.5 mL) at 25 °C for 10 h afforded **3t** as a white solid (70 mg, 58%).

- R<sub>f</sub> = 0.2 (EtOAc/Petroleum Ether = 1/10).
- mp: 186.5 – 190.5 °C.
- <sup>1</sup>H NMR (400 MHz, CDCl<sub>3</sub>) δ 7.69 (d, *J* = 8.4 Hz, 2H), 7.66 (d, *J* = 8.0 Hz, 1H), 7.33 (t, *J* = 8.0 Hz, 1H), 7.24 (d, *J* = 8.0 Hz, 2H), 6.80 (d, *J* = 7.6 Hz, 1H), 3.78 (t, *J* = 4.4 Hz, 4H), 3.13 (s, 2H), 2.87 (t, *J* = 4.4 Hz, 4H), 2.38 (s, 3H), 0.28 (s, 6H).
- <sup>13</sup>C NMR (100 MHz, CDCl<sub>3</sub>) δ 158.8, 151.4, 143.6, 135.4, 132.8, 129.5, 127.2, 124.2, 114.7, 113.7, 67.4, 53.8, 38.7, 21.5, -1.7.
- IR (neat) cm<sup>-1</sup> 2956, 2851, 1572, 1450, 1346, 1292, 1163, 1070.
- HRMS calcd for C<sub>20</sub>H<sub>27</sub>N<sub>2</sub>O<sub>3</sub>SSi (M+H)<sup>+</sup>: 403.1506, found 403.1506.

**ethyl 4-(3,3-dimethyl-1-tosyl-2,3-dihydro-1H-benzod[1,3]azasilol-4-yl)piperazine-1-carboxylate (3u)**

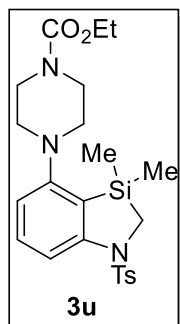

**3u** was prepared according to General Method B. **1a** (100 mg, 0.30 mmol), **2s** (341 mg, 0.75 mmol, 2.5 equiv.), Cs<sub>2</sub>CO<sub>3</sub> (244 mg, 0.75 mmol, 2.5 equiv.) and 18-crown-6 (198 mg, 0.75 mmol, 2.5 equiv.) in DME (1.5 mL) at 25 °C for 10 h afforded **3u** as a pale yellow solid (102 mg, 72%).

- R<sub>f</sub> = 0.3 (EtOAc/Petroleum Ether = 1/4).
- mp: 152.3 – 155.1 °C.
- <sup>1</sup>H NMR (400 MHz, CDCl<sub>3</sub>) δ 7.68 (d, *J* = 8.4 Hz, 2H), 7.66 (d, *J* = 8.0 Hz, 1H), 7.31 (t, *J* = 8.0 Hz, 1H), 7.24 (d, *J* = 8.0 Hz, 2H), 6.75 (d, *J* = 7.6 Hz, 1H), 4.16 (q, *J* = 7.2 Hz, 2H), 3.55 (t, *J* = 4.4 Hz, 4H), 3.13 (s, 2H), 2.82 (t, *J* = 4.4 Hz, 4H), 2.38 (s, 3H), 1.27 (t, *J* = 7.2 Hz, 3H), 0.27 (s, 6H).
- <sup>13</sup>C NMR (100 MHz, CDCl<sub>3</sub>) δ 158.7, 155.6, 151.5, 143.6, 135.4, 132.8, 129.5, 127.2, 124.3,

114.8, 113.9, 61.5, 53.3, 44.2, 38.7, 21.5, 14.7, -1.7.

- IR (neat)  $\text{cm}^{-1}$  2955, 1697, 1573, 1429, 1347, 1243, 1163, 1090, 1062, 1006.
- HRMS calcd for  $\text{C}_{23}\text{H}_{32}\text{N}_3\text{O}_4\text{SSi}$  ( $\text{M}+\text{H}$ )<sup>+</sup>: 474.1877, found 474.1874.

### **3,3-dimethyl-4-(phenylthio)-1-tosyl-2,3-dihydro-1H-benzof[d][1,3]azasilole (3v)**

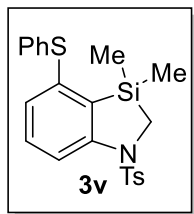

**3v** was prepared according to General Method B. **1b** (100 mg, 0.30 mmol), **2t** (305 mg, 0.75 mmol, 2.5 equiv.),  $\text{Cs}_2\text{CO}_3$  (244 mg, 0.75 mmol, 2.5 equiv.) and 18-crown-6 (198 mg, 0.75 mmol, 2.5 equiv.) in DME (1.5 mL) at 25 °C for 10 h afforded **3v** as a pale yellow oil (73 mg, 57%).

- $R_f = 0.4$  (EtOAc/Petroleum Ether = 1/10).
- $^1\text{H}$  NMR (400 MHz,  $\text{CDCl}_3$ )  $\delta$  7.79 (d,  $J = 8.4$  Hz, 1H), 7.65 (d,  $J = 8.4$  Hz, 2H), 7.25 – 7.19 (m, 5H), 7.19 – 7.11 (m, 3H), 6.88 (d,  $J = 7.2$  Hz, 1H), 3.13 (s, 2H), 2.35 (s, 3H), 0.22 (s, 6H).
- $^{13}\text{C}$  NMR (100 MHz,  $\text{CDCl}_3$ )  $\delta$  150.9, 143.8, 140.6, 136.4, 135.1, 132.4, 130.9, 129.7, 129.6, 129.1, 127.1, 126.8, 126.7, 116.0, 38.4, 21.5, -2.2.
- IR (neat)  $\text{cm}^{-1}$  2921, 2152, 2017, 1980, 1569, 1438, 1275, 1260, 1165, 764, 750.
- HRMS calcd for  $\text{C}_{22}\text{H}_{24}\text{NO}_2\text{S}_2\text{Si}$  ( $\text{M}+\text{H}$ )<sup>+</sup>: 426.1012, found 426.1009.

### **diethyl (3,3-dimethyl-1-tosyl-2,3-dihydro-1H-benzof[d][1,3]azasilol-4-yl)phosphonate (3w)**

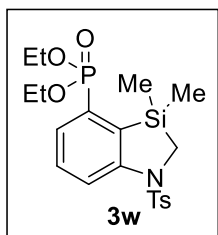

**3w** was prepared according to General Method B. **1b** (100 mg, 0.30 mmol), **2u** (326 mg, 0.75 mmol, 2.5 equiv.),  $\text{Cs}_2\text{CO}_3$  (244 mg, 0.75 mmol, 2.5 equiv.) and 18-crown-6 (198 mg, 0.75 mmol, 2.5 equiv.) in DME (1.5 mL) at 25 °C for 10 h afforded **3w** as a pale yellow oil (60 mg, 44%).

- $R_f = 0.2$  (EtOAc/Petroleum Ether = 1/4).
- $^1\text{H}$  NMR (400 MHz,  $\text{CDCl}_3$ )  $\delta$  8.1 (d,  $J = 8.4$  Hz, 1H), 7.7 (d,  $J = 8.4$  Hz, 2H), 7.5 – 7.3 (m, 2H), 7.2 (d,  $J = 8.0$  Hz, 4H), 4.2 – 3.8 (m, 4H), 3.1 (s, 2H), 2.4 (s, 3H), 1.3 (t,  $J = 7.2$  Hz, 6H), 0.4 (s, 6H).
- $^{13}\text{C}$  NMR (100 MHz,  $\text{CDCl}_3$ )  $\delta$  151.1 (d,  $J = 22.5$  Hz), 143.8, 135.2, 133.4 (d,  $J = 156.1$  Hz), 132.3 (d,  $J = 10.7$  Hz), 131.2 (d,  $J = 15.5$  Hz), 129.6, 127.1, 125.9 (d,  $J = 10.6$  Hz), 120.3 (d,  $J = 3.3$  Hz), 62.0, 62.0, 39.5, 21.5, 16.3, 16.2, -1.1.
- IR (neat)  $\text{cm}^{-1}$  3004, 2987, 1571, 1446, 1348, 1275, 1260, 1160, 1020, 764, 749.
- HRMS calcd for  $\text{C}_{20}\text{H}_{29}\text{NO}_5\text{PSSi}$  ( $\text{M}+\text{H}$ )<sup>+</sup>: 454.1268, found 454.1263.

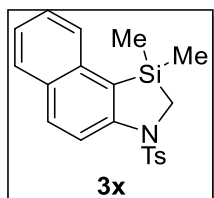

### **1,1-dimethyl-3-tosyl-2,3-dihydro-1H-naphthof[1,2-d][1,3]azasilole (3x)**

**3x** was prepared according to General Method B. **1a** (100 mg, 0.30 mmol), **2v** (261 mg, 0.75 mmol, 2.5 equiv.),  $\text{Cs}_2\text{CO}_3$  (244 mg, 0.75 mmol, 2.5 equiv.) and 18-crown-6 (198 mg, 0.75 mmol, 2.5 equiv.) in DME (1.5 mL) at 25 °C for 10 h afforded **3x** as a pale yellow solid (98 mg, 89%).

- $R_f = 0.3$  (EtOAc/Petroleum Ether = 1/10).
- $^1\text{H}$  NMR (400 MHz,  $\text{CDCl}_3$ )  $\delta$  8.23 (d,  $J = 9.2$  Hz, 1H), 7.85 (d,  $J = 9.2$  Hz, 1H), 7.82 (d,  $J = 8.0$  Hz, 1H), 7.64 (d,  $J = 8.0$  Hz, 2H), 7.60 (d,  $J = 8.0$  Hz, 1H), 7.46 (t,  $J = 7.2$  Hz, 1H), 7.38 (t,  $J = 7.2$  Hz, 1H), 7.19 (d,  $J = 8.4$  Hz, 2H), 3.28 (s, 2H), 2.34 (s, 3H), 0.37 (s, 6H).
- $^{13}\text{C}$  NMR (100 MHz,  $\text{CDCl}_3$ )  $\delta$  149.8, 143.7, 136.4, 134.9, 132.1, 130.1, 129.5, 128.5, 127.1, 127.0, 124.6, 122.4, 118.0, 38.9, 21.4, -1.7.
- IR (neat)  $\text{cm}^{-1}$  2961, 1619, 1585, 1503, 1452, 1341, 1275, 1258, 1159, 1088, 1008.
- HRMS calcd for  $\text{C}_{20}\text{H}_{22}\text{NO}_2\text{SSi}$  ( $\text{M}+\text{H}$ )<sup>+</sup>: 368.1135, found 368.1133.



**3,3,4-trimethyl-1-tosyl-2,3-dihydro-1H-benzo[d][1,3]azasilole and 3,3,7-trimethyl-1-tosyl-2,3-dihydro-1H-benzo[d][1,3]azasilole (3y)**

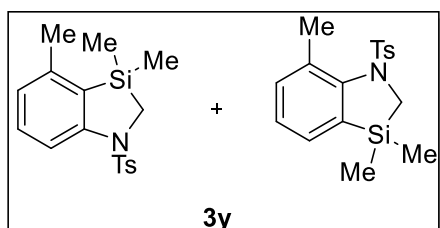

**3y** was prepared according to General Method B. **1a** (100 mg, 0.3 mmol), **2x** (234 mg, 0.75 mmol, 2.5 equiv.), Cs<sub>2</sub>CO<sub>3</sub> (244 mg, 0.75 mmol, 2.5 equiv.) and 18-crown-6 (198 mg, 0.75 mmol, 2.5 equiv.) in DME (1.5 mL) at 25 °C for 10 h afforded **3y** as a white solid (72 mg, 73%, *rr* = 3:1).

➤ *R<sub>f</sub>* = 0.2 (EtOAc/Petroleum Ether = 1/10).

➤ mp: 86.3 – 89.1 °C.

- <sup>1</sup>H NMR (400 MHz, CDCl<sub>3</sub>) δ 7.66 (d, *J* = 8.4 Hz, 3H), 7.60 (d, *J* = 8.4 Hz, 6H), 7.35 (d, *J* = 8.4 Hz, 2H), 7.25 (d, *J* = 7.6 Hz, 1H), 7.21 – 7.18 (m, 2H), 7.16 (d, *J* = 8.0 Hz, 9H), 7.12 (d, *J* = 8.4 Hz, 1H), 7.09 (d, *J* = 7.2 Hz, 1H), 6.74 (d, *J* = 7.2 Hz, 3H), 3.10 (s, 6H), 3.09 (s, 2H), 2.52 (s, 3H), 2.32 (s, 3H), 2.30 (s, 9H), 2.26 (s, 9H), 0.21 (s, 18H), -0.22 (s, 6H).
- <sup>13</sup>C NMR (100 MHz, CDCl<sub>3</sub>) δ 150.2, 149.2, 143.7, 143.5, 143.4, 135.2, 134.7, 134.5, 134.2, 133.6, 131.6, 129.5, 129.4, 129.3, 128.5, 127.1, 126.1, 126.1, 123.6, 114.2, 40.6, 38.2, 22.3, 21.4, 21.4, 21.0, -2.3, -2.6.
- IR (neat) cm<sup>-1</sup> 2965, 2918, 1578, 1454, 1345, 1251, 1160, 1089, 1041, 968.
- HRMS calcd for C<sub>17</sub>H<sub>22</sub>NO<sub>2</sub>SSi (M+H)<sup>+</sup>: 332.1135, found 332.1130.

**3,3,5-trimethyl-1-tosyl-2,3-dihydro-1H-benzo[d][1,3]azasilole and 3,3,6-trimethyl-1-tosyl-2,3-dihydro-1H-benzo[d][1,3]azasilole (3z)**

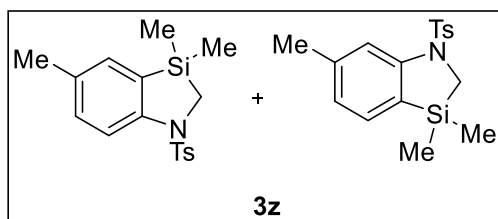

**3z** was prepared according to General Method C. **1a** (100 mg, 0.30 mmol), **2y** (234 mg, 0.75 mmol, 2.5 equiv.), Cs<sub>2</sub>CO<sub>3</sub> (244 mg, 0.75 mmol, 2.5 equiv.) and 18-crown-6 (198 mg, 0.75 mmol, 2.5 equiv.) in DME (1.5 mL) at 25 °C for 10 h afforded **3z** as a white solid (78 mg, 79%, *rr* = 1.25:1).

➤ *R<sub>f</sub>* = 0.3 (EtOAc/Petroleum Ether = 1/10).

- mp: 83.9 – 87.4 °C.
- <sup>1</sup>H NMR (400 MHz, CDCl<sub>3</sub>) δ 7.81 (d, *J* = 8.8 Hz, 0.85H), 7.78 (d, *J* = 17.6 Hz, 1H), 7.66 (t, *J* = 8.4 Hz, 3.7H), 7.28 (d, *J* = 7.2 Hz, 0.85H), 7.25 - 7.20 (m, 3.7H), 7.19 – 7.12 (m, 1.85H), 6.86 (d, *J* = 7.6 Hz, 1H), 3.17 (s, 2H), 3.16 (s, 1.7H), 2.37 (s, 6H), 2.36 (s, 2.55H), 2.28 (s, 2.55H), 0.20 (s, 6H), 0.19 (s, 5.1H).
- <sup>13</sup>C NMR (100 MHz, CDCl<sub>3</sub>) δ 150.5, 147.9, 143.5, 143.5, 141.5, 135.2, 135.0, 132.9, 132.4, 132.3, 131.9, 129.5, 129.4, 127.1, 127.1, 127.1, 124.1, 123.6, 117.6, 117.0, 38.7, 38.5, 22.0, 21.4, 21.4, 20.5, -2.1, -2.2.
- IR (neat) cm<sup>-1</sup> 2965, 2918, 1598, 1461, 1398, 1347, 1258, 1164, 1145, 1090.
- HRMS calcd for C<sub>17</sub>H<sub>22</sub>NO<sub>2</sub>SSi (M+H)<sup>+</sup>: 332.1135, found 332.1133.

**3,3-dimethyl-5-phenyl-1-tosyl-2,3-dihydro-1H-benzo[d][1,3]azasilole and 3,3-dimethyl-6-phenyl-1-tosyl-2,3-dihydro-1H-benzo[d][1,3]azasilole (3aa)**

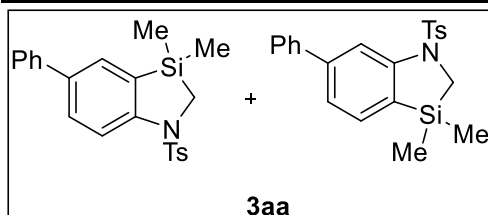

**1-tosyl-2,3-dihydro-1H-benzo[d][1,3]azasilole (3aa)**

**3aa** was prepared according to General Method C. **1a** (100 mg, 0.30 mmol), **2z** (281 mg, 0.75 mmol, 2.5 equiv.), Cs<sub>2</sub>CO<sub>3</sub> (244 mg, 0.75 mmol, 2.5 equiv.) and 18-crown-6

(198 mg, 0.75 mmol, 2.5 equiv.) in DME (1.5 mL) at 25 °C for 10 h afforded **3aa** as a pale yellow oil (80 mg, 68%, *rr* = 1.5:1).

- $R_f$  = 0.4 (EtOAc/Petroleum Ether = 1/10).
- $^1\text{H}$  NMR (400 MHz,  $\text{CDCl}_3$ )  $\delta$  8.16 (d,  $J$  = 1.5 Hz, 1H), 7.98 (d,  $J$  = 8.4 Hz, 0.67H), 7.74 – 7.68 (m, 3.33H), 7.63 – 7.61 (m, 1.33H), 7.60 (s, 2H), 7.56 (s, 1H), 7.54 (s, 0.67H), 7.53 – 7.42 (m, 3.33H), 7.41 (s, 0.77H), 7.40 - 7.38 (m, 1H), 7.36 - 7.30 (m, 1H), 7.32 – 7.27 (m, 0.77H), 7.26 – 7.20 (m, 3.33H), 3.24 (s, 2H), 3.22 (s, 1.33H), 2.36 (s, 2H), 2.35 (s, 3H), 0.26 (s, 4H), 0.25 (s, 6H).
- $^{13}\text{C}$  NMR (100 MHz,  $\text{CDCl}_3$ )  $\delta$  151.5, 150.1, 144.8, 144.3, 141.5, 141.0, 136.4, 135.8, 135.7, 133.5, 131.7, 130.7, 130.2, 130.2, 129.4, 129.3, 128.2, 128.2, 127.9, 127.7, 127.7, 127.6, 127.3, 126.3, 122.7, 117.7, 116.2, 39.4, 39.2, 22.1, 22.1, -1.5, -1.6.
- IR (neat)  $\text{cm}^{-1}$  3060, 2965, 1594, 1465, 1390, 1346, 1250, 1161, 1089, 1071.
- HRMS calcd for  $\text{C}_{22}\text{H}_{24}\text{NO}_2\text{SSi}$  ( $\text{M}+\text{H}$ ) $^+$ : 394.1292, found 394.1292.

### 3-ethyl-3-methyl-1-tosyl-2,3-dihydro-1H-benzo[d][1,3]azasilole (3ab)

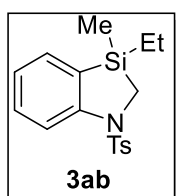

**3ab** was prepared according to General Method B. **1e** (100 mg, 0.29 mmol), **2a** (215 mg, 0.72 mmol, 2.5 equiv.),  $\text{Cs}_2\text{CO}_3$  (234 mg, 0.72 mmol, 2.5 equiv.) and 18-crown-6 (190 mg, 0.72 mmol, 2.5 equiv.) in DME (1.5 mL) at 25 °C for 10 h afforded **3ab** as a pale yellow oil (74 mg, 78%).

- $R_f$  = 0.3 (EtOAc/Petroleum Ether = 1/10).
- $^1\text{H}$  NMR (400 MHz,  $\text{CDCl}_3$ )  $\delta$  7.92 (d,  $J$  = 8.4 Hz, 1H), 7.68 (d,  $J$  = 8.4 Hz, 2H), 7.38 (dd,  $J$  = 7.2, 1.2 Hz, 1H), 7.34 (ddd,  $J$  = 8.6, 7.2, 1.6 Hz, 1H), 7.22 (d,  $J$  = 8.0 Hz, 2H), 7.01 (t,  $J$  = 7.2 Hz, 1H), 3.17 (dd,  $J$  = 45.6, 14.8 Hz, 2H), 2.36 (s, 3H), 0.86 (t,  $J$  = 8.4 Hz, 3H), 0.68 (q,  $J$  = 8.0 Hz, 2H), 0.21 (s, 3H).
- $^{13}\text{C}$  NMR (100 MHz,  $\text{CDCl}_3$ )  $\delta$  150.5, 143.6, 135.3, 132.9, 131.2, 129.5, 127.1, 125.9, 122.8, 116.8, 36.8, 21.4, 6.9, 6.2, -4.3.
- IR (neat)  $\text{cm}^{-1}$  2955, 1586, 1459, 1346, 1162, 1135, 1089, 938.
- HRMS calcd for  $\text{C}_{17}\text{H}_{22}\text{NO}_2\text{SSi}$  ( $\text{M}+\text{H}$ ) $^+$ : 354.0954, found 354.0954.

### 3-methyl-3-pentyl-1-tosyl-2,3-dihydro-1H-benzo[d][1,3]azasilole (3ac)

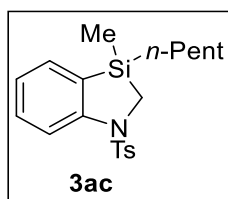

**3z** was prepared according to General Method B. **1f** (100 mg, 0.25 mmol), **2a** (191 mg, 0.64 mmol, 2.5 equiv.),  $\text{Cs}_2\text{CO}_3$  (209 mg, 0.64 mmol, 2.5 equiv.) and 18-crown-6 (169 mg, 0.64 mmol, 2.5 equiv.) in DME (1.5 mL) at 25 °C for 10 h afforded **3ac** as a pale yellow oil (82 mg, 86%).

- $R_f$  = 0.5 (EtOAc/Petroleum Ether = 1/10).
- $^1\text{H}$  NMR (400 MHz,  $\text{CDCl}_3$ )  $\delta$  7.93 (d,  $J$  = 8.4 Hz, 1H), 7.66 (d,  $J$  = 8.0 Hz, 2H), 7.37 (d,  $J$  = 7.6 Hz, 1H), 7.33 (d,  $J$  = 7.6 Hz, 1H), 7.22 (d,  $J$  = 8.0 Hz, 2H), 7.01 (t,  $J$  = 7.2 Hz, 1H), 3.16 (dd,  $J$  = 35.2, 14.4 Hz, 2H), 2.36 (s, 3H), 1.26 – 1.15 (m, 6H), 0.81 (t,  $J$  = 6.8 Hz, 3H), 0.68 – 0.55 (m, 2H), 0.21 (s, 3H).
- $^{13}\text{C}$  NMR (100 MHz,  $\text{CDCl}_3$ )  $\delta$  150.4, 143.6, 135.2, 132.9, 131.1, 129.5, 127.1, 126.3, 122.8, 116.9, 37.2, 35.3, 23.0, 22.1, 21.5, 14.2, 13.9, -3.8.
- IR (neat)  $\text{cm}^{-1}$  2956, 2921, 1586, 1460, 1439, 1348, 1260, 1164, 1135, 1090, 1026.
- HRMS calcd for  $\text{C}_{20}\text{H}_{28}\text{NO}_2\text{SSi}$  ( $\text{M}+\text{H}$ ) $^+$ : 374.1605, found 374.1603.

### 3-(3-methoxypropyl)-3-methyl-1-tosyl-2,3-dihydro-1H-benzo[d][1,3]azasilole (3ad)

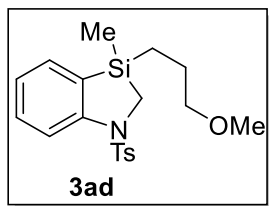

**3ad** was prepared according to General Method B. **1g** (100 mg, 0.26 mmol), **2a** (190 mg, 0.64 mmol, 2.5 equiv.), Cs<sub>2</sub>CO<sub>3</sub> (208 mg, 0.64 mmol, 2.5 equiv.) and 18-crown-6 (168 mg, 0.64 mmol, 2.5 equiv.) in DME (1.5 mL) at 25 °C for 10 h afforded **3ad** as a pale yellow oil (76 mg, 79%).

➤ R<sub>f</sub> = 0.2 (EtOAc/Petroleum Ether = 1/10).

➤ <sup>1</sup>H NMR (400 MHz, CDCl<sub>3</sub>) δ 7.91 (d, *J* = 8.4 Hz, 1H), 7.66 (d, *J* = 8.4 Hz, 2H), 7.37 (dd, *J* = 7.6, 1.2 Hz, 1H), 7.33 (ddd, *J* = 8.8, 7.6, 1.6 Hz, 1H), 7.22 (d, *J* = 8.0 Hz, 2H), 7.00 (td, *J* = 7.2, 0.8 Hz, 1H), 3.28 (s, 3H), 3.16 (dd, *J* = 37.2, 14.4 Hz, 2H), 3.20 – 3.01 (m, 2H), 2.36 (s, 3H), 1.57 – 1.40 (m, 2H), 0.78 – 0.55 (m, 2H), 0.22 (s, 3H).

➤ <sup>13</sup>C NMR (100 MHz, CDCl<sub>3</sub>) δ 150.4, 143.6, 135.2, 132.9, 131.1, 129.5, 127.1, 126.5, 122.8, 116.9, 74.5, 58.5, 37.4, 23.6, 21.5, 11.0, -3.8.

➤ IR (neat) cm<sup>-1</sup> 2929, 2882, 1586, 1460, 1439, 1346, 1275, 1260, 1162, 1067, 1027.

➤ HRMS calcd for C<sub>19</sub>H<sub>26</sub>NO<sub>3</sub>SSi (M+H)<sup>+</sup>: 376.1397, found 376.1396.

### 3-(2-(1,3-dioxolan-2-yl)ethyl)-3-methyl-1-tosyl-2,3-dihydro-1H-benzo[d][1,3]azasilole (3ae)

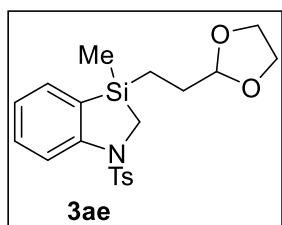

**3ae** was prepared according to General Method B. **1h** (100 mg, 0.24 mmol), **2a** (177 mg, 0.60 mmol, 2.5 equiv.), Cs<sub>2</sub>CO<sub>3</sub> (194 mg, 0.60 mmol, 2.5 equiv.) and 18-crown-6 (157 mg, 0.60 mmol, 2.5 equiv.) in DME (1.5 mL) at 25 °C for 10 h afforded **3ae** as a pale yellow oil (77 mg, 80%).

➤ R<sub>f</sub> = 0.4 (EtOAc/Petroleum Ether = 1/4).

➤ <sup>1</sup>H NMR (400 MHz, CDCl<sub>3</sub>) δ 7.91 (d, *J* = 8.4 Hz, 1H), 7.66 (d, *J* = 8.4 Hz, 2H), 7.38 (d, *J* = 6.8 Hz, 1H), 7.33 (t, *J* = 8.0 Hz, 1H), 7.22 (d, *J* = 8.0 Hz, 2H), 7.00 (t, *J* = 7.2 Hz, 1H), 4.73 (t, *J* = 4.4 Hz, 1H), 4.03 – 3.71 (m, 4H), 3.17 (dd, *J* = 31.2, 14.8 Hz, 2H), 2.36 (s, 3H), 1.64 – 1.40 (m, 2H), 0.78 (t, *J* = 8.4 Hz, 2H), 0.23 (s, 3H).

➤ <sup>13</sup>C NMR (100 MHz, CDCl<sub>3</sub>) δ 150.4, 143.7, 135.1, 133.0, 131.2, 129.5, 127.1, 126.1, 122.9, 116.9, 104.9, 65.0, 64.9, 37.4, 27.5, 21.5, 7.9, -3.8.

➤ IR (neat) cm<sup>-1</sup> 2920, 1586, 1460, 1439, 1345, 1261, 1162, 1132, 1068, 1028.

➤ HRMS calcd for C<sub>20</sub>H<sub>26</sub>NO<sub>4</sub>SSi (M+H)<sup>+</sup>: 404.1346, found 404.1345.

### 3-cyclopropyl-3-methyl-1-tosyl-2,3-dihydro-1H-benzo[d][1,3]azasilole (3af)

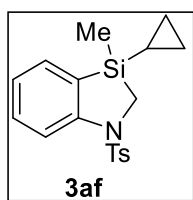

**3af** was prepared according to General Method B. **1i** (100 mg, 0.28 mmol), **2a** (207 mg, 0.69 mmol, 2.5 equiv.), Cs<sub>2</sub>CO<sub>3</sub> (226 mg, 0.69 mmol, 2.5 equiv.) and 18-crown-6 (184 mg, 0.69 mmol, 2.5 equiv.) in DME (1.5 mL) at 25 °C for 10 h afforded **3af** as a pale yellow oil (64 mg, 67%).

➤ R<sub>f</sub> = 0.3 (EtOAc/Petroleum Ether = 1/10).

➤ <sup>1</sup>H NMR (400 MHz, CDCl<sub>3</sub>) δ 7.91 (d, *J* = 8.4 Hz, 1H), 7.68 (d, *J* = 8.4 Hz, 2H), 7.43 – 7.28 (m, 2H), 7.22 (d, *J* = 8.0 Hz, 2H), 7.00 (t, *J* = 7.2 Hz, 1H), 3.17 (dd, *J* = 56.0, 14.4 Hz, 2H), 2.36 (s, 3H), 0.75 – 0.49 (m, 2H), 0.27 – 0.20 (m, 1H), 0.16 (s, 3H), 0.09 – 0.01 (m, 1H), -0.37 (tt, *J* = 9.6, 6.8 Hz, 1H).

➤ <sup>13</sup>C NMR (100 MHz, CDCl<sub>3</sub>) δ 150.7, 143.6, 135.2, 133.1, 131.3, 129.5, 127.1, 125.1, 122.7, 116.8, 37.2, 21.5, 1.6, 1.3, -5.2, -6.8.

➤ IR (neat) cm<sup>-1</sup> 3005, 2933, 1586, 1438, 1346, 1260, 1161, 1089, 1028, 940.

➤ HRMS calcd for C<sub>18</sub>H<sub>21</sub>NNaO<sub>2</sub>SSi (M+Na)<sup>+</sup>: 366.0954, found 366.0953.

### 3-cyclobutyl-3-methyl-1-tosyl-2,3-dihydro-1H-benzo[d][1,3]azasilole (3ag)

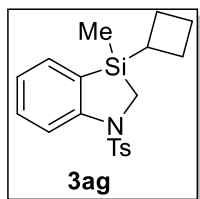

**3ag** was prepared according to General Method B. **1j** (100 mg, 0.27 mmol), **2a** (195 mg, 0.67 mmol, 2.5 equiv.), Cs<sub>2</sub>CO<sub>3</sub> (218 mg, 0.67 mmol, 2.5 equiv.) and 18-crown-6 (177 mg, 0.67 mmol, 2.5 equiv.) in DME (1.5 mL) at 25 °C for 10 h afforded **3ag** as a pale yellow oil (78 mg, 81%).

- R<sub>f</sub> = 0.4 (EtOAc/Petroleum Ether = 1/10).
- <sup>1</sup>H NMR (400 MHz, CDCl<sub>3</sub>) δ 7.93 (d, *J* = 8.4 Hz, 1H), 7.69 (d, *J* = 8.4 Hz, 2H), 7.42 (d, *J* = 7.2 Hz, 1H), 7.34 (t, *J* = 7.2 Hz, 1H), 7.22 (d, *J* = 8.0 Hz, 2H), 7.01 (t, *J* = 7.2 Hz, 1H), 3.17 (d, *J* = 55.6, 14.4 Hz, 2H), 2.36 (s, 3H), 2.14 – 1.99 (m, 3H), 1.98 – 1.81 (m, 3H), 1.78 – 1.66 (m, 1H), 0.22 (s, 3H).
- <sup>13</sup>C NMR (100 MHz, CDCl<sub>3</sub>) δ 150.7, 143.6, 135.2, 133.1, 131.2, 129.5, 127.1, 125.4, 122.7, 116.6, 76.7, 36.2, 23.0, 22.7, 21.5, 20.2, -5.6.
- IR (neat) cm<sup>-1</sup> 2963, 2860, 1585, 1492, 1460, 1438, 1346, 1274, 1261, 1162, 1089.
- HRMS calcd for C<sub>19</sub>H<sub>24</sub>NO<sub>2</sub>SSi (M+H)<sup>+</sup>: 358.1291, found 358.1292.

### 3-cyclopentyl-3-methyl-1-tosyl-2,3-dihydro-1H-benzod[1,3]azasilole (3ah)

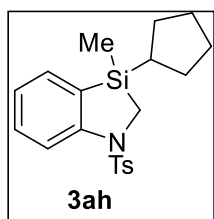

**3ah** was prepared according to General Method B. **1k** (100 mg, 0.26 mmol), **2a** (192 mg, 0.65 mmol, 2.5 equiv.), Cs<sub>2</sub>CO<sub>3</sub> (210 mg, 0.65 mmol, 2.5 equiv.) and 18-crown-6 (170 mg, 0.65 mmol, 2.5 equiv.) in DME (1.5 mL) at 25 °C for 10 h afforded **3ah** as a pale yellow oil (82 mg, 85%).

- R<sub>f</sub> = 0.4 (EtOAc/Petroleum Ether = 1/10).
- <sup>1</sup>H NMR (400 MHz, CDCl<sub>3</sub>) δ 7.93 (d, *J* = 8.4 Hz, 1H), 7.68 (d, *J* = 8.0 Hz, 2H), 7.38 (d, *J* = 7.6 Hz, 1H), 7.33 (t, *J* = 7.2 Hz, 1H), 7.22 (d, *J* = 8.0 Hz, 2H), 7.00 (t, *J* = 7.2 Hz, 1H), 3.15 (dd, *J* = 50.8, 14.4 Hz, 2H), 2.36 (s, 3H), 1.75 – 1.60 (m, 2H), 1.55 – 1.39 (m, 4H), 1.25 – 1.08 (m, 2H), 1.05 – 0.90 (m, 1H), 0.21 (s, 3H).
- <sup>13</sup>C NMR (100 MHz, CDCl<sub>3</sub>) δ 150.6, 143.6, 135.2, 133.1, 131.1, 129.5, 127.1, 125.8, 122.7, 116.7, 36.6, 27.8, 27.7, 26.8, 24.0, 21.4, -5.1.
- IR (neat) cm<sup>-1</sup> 2947, 2861, 1585, 1439, 1347, 1260, 1163, 1068, 1026, 940.
- HRMS calcd for C<sub>20</sub>H<sub>26</sub>NO<sub>2</sub>SSi (M+H)<sup>+</sup>: 372.1448, found 372.1447.

### 3-cyclohexyl-3-methyl-1-tosyl-2,3-dihydro-1H-benzod[1,3]azasilole (3ai)

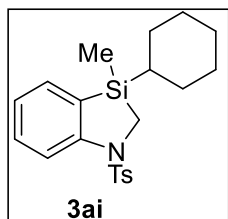

**3ai** was prepared according to General Method B. **1l** (100 mg, 0.25 mmol), **2a** (186 mg, 0.62 mmol, 2.5 equiv.), Cs<sub>2</sub>CO<sub>3</sub> (203 mg, 0.62 mmol, 2.5 equiv.) and 18-crown-6 (164 mg, 0.62 mmol, 2.5 equiv.) in DME (1.5 mL) at 25 °C for 10 h afforded **3ai** as a pale yellow oil (85 mg, 88%).

- R<sub>f</sub> = 0.4 (EtOAc/Petroleum Ether = 1/10).
- <sup>1</sup>H NMR (400 MHz, CDCl<sub>3</sub>) δ 7.94 (d, *J* = 8.4 Hz, 1H), 7.67 (d, *J* = 8.4 Hz, 2H), 7.45 – 7.29 (m, 2H), 7.22 (d, *J* = 8.0 Hz, 2H), 7.00 (t, *J* = 7.2 Hz, 1H), 3.15 (dd, *J* = 94.0, 14.4 Hz, 2H), 2.36 (s, 3H), 1.75 – 1.58 (m, 2H), 1.57 – 1.50 (m, 2H), 1.50 – 1.44 (m, 2H), 1.20 – 1.05 (m, 2H), 1.03 – 0.85 (m, 2H), 0.77 – 0.60 (m, 1H), 0.19 (s, 3H).
- <sup>13</sup>C NMR (100 MHz, CDCl<sub>3</sub>) δ 150.6, 143.6, 135.1, 133.2, 131.1, 129.5, 127.1, 125.5, 122.7, 116.9, 35.9, 27.5, 27.5, 26.9, 26.7, 26.4, 24.5, 21.5, -6.1.
- IR (neat) cm<sup>-1</sup> 2918, 1439, 1348, 1275, 1261, 1163, 1068, 1025, 940.
- HRMS calcd for C<sub>21</sub>H<sub>28</sub>NO<sub>2</sub>SSi (M+H)<sup>+</sup>: 386.1605, found 386.1605.

### 3-methyl-1-tosyl-3-vinyl-2,3-dihydro-1H-benzod[1,3]azasilole (3aj)

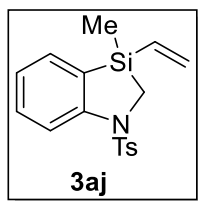

**3aj** was prepared according to General Method B. **1m** (100 mg, 0.29 mmol), **2a** (216 mg, 0.72 mmol, 2.5 equiv.), Cs<sub>2</sub>CO<sub>3</sub> (236 mg, 0.72 mmol, 2.5 equiv.) and 18-crown-6 (191 mg, 0.72 mmol, 2.5 equiv.) in DME (1.5 mL) at 25 °C for 10 h afforded **3aj** as a pale yellow oil (76 mg, 80%).

➤ R<sub>f</sub> = 0.3 (EtOAc/Petroleum Ether = 1/10).  
 ➤ <sup>1</sup>H NMR (400 MHz, CDCl<sub>3</sub>) δ 7.93 (d, *J* = 8.0 Hz, 1H), 7.66 (d, *J* = 8.4 Hz, 2H), 7.37 (d, *J* = 7.2 Hz, 1H), 7.35 (dd, *J* = 7.2, 1.6 Hz, 1H), 7.22 (d, *J* = 8.0 Hz, 2H), 7.02 (t, *J* = 7.2 Hz, 1H), 6.23 – 5.87 (m, 2H), 5.70 (dd, *J* = 19.6, 4.4 Hz, 1H), 3.22 (dd, *J* = 24.4, 14.4 Hz, 2H), 2.37 (s, 3H), 0.31 (s, 3H).

- <sup>13</sup>C NMR (100 MHz, CDCl<sub>3</sub>) δ 150.7, 143.7, 136.1, 135.2, 133.5, 133.2, 131.4, 129.5, 127.1, 125.2, 123.0, 117.1, 37.6, 21.4, -4.7.  
 ➤ IR (neat) cm<sup>-1</sup> 1586, 1493, 1460, 1345, 1161, 1089.  
 ➤ HRMS calcd for C<sub>17</sub>H<sub>20</sub>NO<sub>2</sub>SSi (M+H)<sup>+</sup>: 339.0979, found 339.0978.

### 3-(but-3-en-1-yl)-3-methyl-1-tosyl-2,3-dihydro-1H-benzo[d][1,3]azasilole (3al)

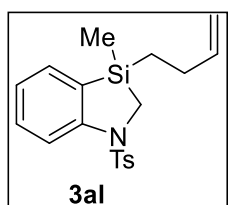

**3al** was prepared according to General Method B. **1o** (100 mg, 0.27 mmol), **2a** (199 mg, 0.67 mmol, 2.5 equiv.), Cs<sub>2</sub>CO<sub>3</sub> (218 mg, 0.67 mmol, 2.5 equiv.) and 18-crown-6 (177 mg, 0.67 mmol, 2.5 equiv.) in DME (1.5 mL) at 25 °C for 10 h afforded **3al** as a pale yellow oil (83 mg, 86%).

➤ R<sub>f</sub> = 0.3 (EtOAc/Petroleum Ether = 1/10).  
 ➤ <sup>1</sup>H NMR (400 MHz, CDCl<sub>3</sub>) δ 7.93 (d, *J* = 8.4 Hz, 1H), 7.66 (d, *J* = 8.4 Hz, 2H), 7.42 – 7.31 (m, 2H), 7.22 (d, *J* = 8.0 Hz, 2H), 7.02 (t, *J* = 7.2 Hz, 1H), 5.73 (ddt, *J* = 16.6, 10.0, 6.4 Hz, 1H), 5.21 – 4.53 (m, 2H), 3.49 – 2.74 (m, 2H), 2.36 (s, 3H), 2.03 – 1.84 (m, 2H), 0.96 – 0.57 (m, 2H), 0.23 (s, 3H).

- <sup>13</sup>C NMR (100 MHz, CDCl<sub>3</sub>) δ 150.4, 143.7, 140.0, 135.0, 133.0, 131.2, 129.5, 127.1, 125.9, 122.9, 117.0, 113.8, 37.2, 27.3, 21.5, 13.4, -3.8.  
 ➤ IR (neat) cm<sup>-1</sup> 2922, 1586, 1459, 1439, 1347, 1248, 1163, 1089, 1026, 941.  
 ➤ HRMS calcd for C<sub>19</sub>H<sub>24</sub>NO<sub>2</sub>SSi (M+H)<sup>+</sup>: 358.1292, found 358.1290.

### 3-methyl-3-phenyl-1-tosyl-2,3-dihydro-1H-benzo[d][1,3]azasilole (3am)

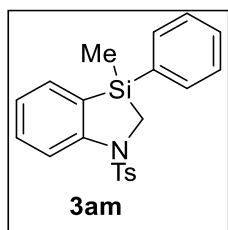

**3am** was prepared according to General Method B. **1p** (100 mg, 0.25 mmol), **2a** (188 mg, 0.63 mmol, 2.5 equiv.), Cs<sub>2</sub>CO<sub>3</sub> (206 mg, 0.63 mmol, 2.5 equiv.) and 18-crown-6 (167 mg, 0.63 mmol, 2.5 equiv.) in DME (1.5 mL) at 25 °C for 10 h afforded **3am** as a pale yellow oil (52 mg, 54%).

➤ R<sub>f</sub> = 0.3 (EtOAc/Petroleum Ether = 1/10).  
 ➤ <sup>1</sup>H NMR (400 MHz, CDCl<sub>3</sub>) δ 8.02 (d, *J* = 8.8 Hz, 1H), 7.67 (d, *J* = 8.0 Hz, 2H), 7.45 – 7.33 (m, 3H), 7.32 – 7.22 (m, 4H), 7.20 (d, *J* = 8.0 Hz, 2H), 7.04 (t, *J* = 7.2 Hz, 1H), 3.48 – 3.24 (dd, *J* = 24.0, 14.8 Hz, 2H), 2.38 (s, 3H), 0.55 (s, 3H).

- <sup>13</sup>C NMR (100 MHz, CDCl<sub>3</sub>) δ 151.0, 143.7, 135.0, 134.2, 133.9, 133.4, 131.6, 130.1, 129.6, 128.1, 127.1, 125.1, 123.2, 117.1, 38.4, 21.5, -4.5.  
 ➤ IR (neat) cm<sup>-1</sup> 1734, 1586, 1460, 1439, 1348, 1260, 1163, 1026.  
 ➤ HRMS calcd for C<sub>21</sub>H<sub>22</sub>NO<sub>2</sub>SSi (M+H)<sup>+</sup>: 380.1135, found 380.1135.

### 3-methyl-3-(p-tolyl)-1-tosyl-2,3-dihydro-1H-benzo[d][1,3]azasilole (3an)

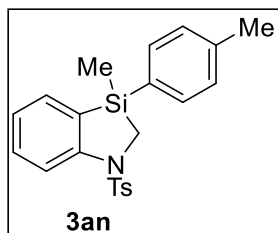

**3an** was prepared according to General Method B. **1q** (100 mg, 0.24 mmol), **2a** (182 mg, 0.61 mmol, 2.5 equiv.), Cs<sub>2</sub>CO<sub>3</sub> (199 mg, 0.61 mmol, 2.5 equiv.) and 18-crown-6 (161 mg, 0.61 mmol, 2.5 equiv.) in DME (1.5 mL) at 25 °C for 10 h afforded **3an** as a pale yellow oil (60 mg, 62%).

- R<sub>f</sub> = 0.4 (EtOAc/Petroleum Ether = 1/10).
- <sup>1</sup>H NMR (400 MHz, CDCl<sub>3</sub>) δ 8.01 (d, *J* = 8.4 Hz, 1H), 7.67 (d, *J* = 8.0 Hz, 2H), 7.37 (d, *J* = 7.2 Hz, 2H), 7.20 (d, *J* = 8.0 Hz, 2H), 7.15 (d, *J* = 7.6 Hz, 2H), 7.10 (d, *J* = 7.6 Hz, 2H), 7.03 (t, *J* = 7.2 Hz, 1H), 3.33 (dd, *J* = 19.2, 14.8 Hz, 2H), 2.38 (s, 3H), 2.33 (s, 3H), 0.52 (s, 3H).

- <sup>13</sup>C NMR (100 MHz, CDCl<sub>3</sub>) δ 150.9, 143.6, 140.3, 135.0, 134.3, 133.4, 131.5, 130.2, 129.5, 128.9, 127.2, 125.4, 123.1, 117.1, 38.5, 21.5, -4.4.
- IR (neat) cm<sup>-1</sup> 2926, 1586, 1460, 1438, 1347, 1262, 1163, 1089.
- HRMS calcd for C<sub>22</sub>H<sub>24</sub>NO<sub>2</sub>SSi (M+H)<sup>+</sup>: 394.1292, found 394.1292.

### 3-((1,1'-biphenyl)-4-yl)-3-methyl-1-tosyl-2,3-dihydro-1H-benzo[d][1,3]azasilole (3ao)

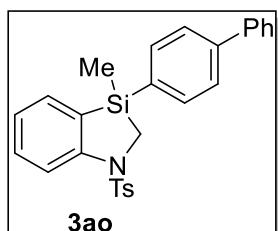

**3ao** was prepared according to General Method B. **1r** (100 mg, 0.21 mmol), **2a** (158 mg, 0.53 mmol, 2.5 equiv.), Cs<sub>2</sub>CO<sub>3</sub> (173 mg, 0.53 mmol, 2.5 equiv.) and 18-crown-6 (140 mg, 0.53 mmol, 2.5 equiv.) in DME (1.5 mL) at 25 °C for 10 h afforded **3ao** as a pale yellow oil (67 mg, 69%).

- R<sub>f</sub> = 0.2 (EtOAc/Petroleum Ether = 1/10).
- <sup>1</sup>H NMR (400 MHz, CDCl<sub>3</sub>) δ 8.04 (d, *J* = 8.8 Hz, 1H), 7.69 (d, *J* = 8.4 Hz, 2H), 7.56 (d, *J* = 8.0 Hz, 2H), 7.51 (d, *J* = 8.0 Hz, 2H), 7.43 (dt, *J* = 14.4, 7.6 Hz, 4H), 7.38 (d, *J* = 7.2 Hz, 1H), 7.33 (d, *J* = 7.6 Hz, 2H), 7.21 (d, *J* = 8.0 Hz, 2H), 7.06 (t, *J* = 7.2 Hz, 1H), 3.39 (dd, *J* = 27.6, 14.8 Hz, 2H), 2.37 (s, 3H), 0.58 (s, 3H).

- <sup>13</sup>C NMR (100 MHz, CDCl<sub>3</sub>) δ 151.0, 143.7, 143.0, 140.6, 135.0, 134.8, 133.4, 132.5, 131.6, 129.6, 128.9, 127.7, 127.2, 127.1, 126.8, 125.1, 123.2, 117.1, 38.5, 21.5, -4.4.
- IR (neat) cm<sup>-1</sup> 3060, 2929, 1595, 1492, 1443, 1346, 1167, 1089, 1064, 1024.
- HRMS calcd for C<sub>27</sub>H<sub>26</sub>NO<sub>2</sub>SSi (M+H)<sup>+</sup>: 456.1448, found 456.1448.

### 3-(4-chlorophenyl)-3-methyl-1-tosyl-2,3-dihydro-1H-benzo[d][1,3]azasilole (3ap)

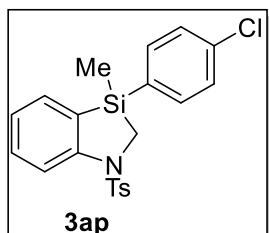

**3ap** was prepared according to General Method B. **1s** (100 mg, 0.22 mmol), **2a** (173 mg, 0.58 mmol, 2.5 equiv.), Cs<sub>2</sub>CO<sub>3</sub> (189 mg, 0.58 mmol, 2.5 equiv.) and 18-crown-6 (154 mg, 0.58 mmol, 2.5 equiv.) in DME (1.5 mL) at 25 °C for 10 h afforded **3ap** as a colorless oil (36 mg, 37%).

- R<sub>f</sub> = 0.3 (EtOAc/Petroleum Ether = 1/10).
- <sup>1</sup>H NMR (400 MHz, CDCl<sub>3</sub>) δ 8.03 (d, *J* = 8.8 Hz, 1H), 7.64 (d, *J* = 8.0 Hz, 2H), 7.41 (t, *J* = 8.4 Hz, 1H), 7.37 (d, *J* = 6.8 Hz, 1H), 7.24 (d, *J* = 8.0 Hz, 2H), 7.18 (d, *J* = 8.0 Hz, 2H), 7.14 (d, *J* = 8.0 Hz, 2H), 7.05 (t, *J* = 7.2 Hz, 1H), 3.33 (dd, *J* = 21.2, 14.8 Hz, 2H), 2.38 (s, 3H), 0.55 (s, 3H).

- <sup>13</sup>C NMR (100 MHz, CDCl<sub>3</sub>) δ 151.0, 143.8, 136.6, 135.5, 134.9, 133.3, 132.3, 131.8, 129.5, 128.3, 127.1, 124.6, 123.4, 117.4, 38.4, 21.5, -4.6.
- IR (neat) cm<sup>-1</sup> 2919, 1734, 1580, 1460, 1438, 1347, 1259, 1163, 1136, 1085, 1044.
- HRMS calcd for C<sub>21</sub>H<sub>21</sub>ClNO<sub>2</sub>SSi (M+H)<sup>+</sup>: 414.0745, found 414.0744.

### 3-(4-fluorophenyl)-3-methyl-1-tosyl-2,3-dihydro-1H-benzo[d][1,3]azasilole (3aq)

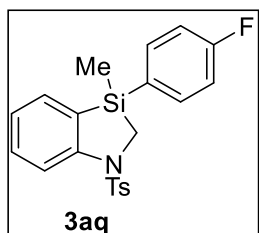

**3aq** was prepared according to General Method B. **1t** (100 mg, 0.24 mmol), **2a** (180 mg, 0.60 mmol, 2.5 equiv.), Cs<sub>2</sub>CO<sub>3</sub> (197 mg, 0.60 mmol, 2.5 equiv.) and 18-crown-6 (160 mg, 0.60 mmol, 2.5 equiv.) in DME (1.5 mL) at 25 °C for 10 h afforded **3aq** as a pale yellow oil (43 mg, 45%).

- R<sub>f</sub> = 0.2 (EtOAc/Petroleum Ether = 1/10).
- <sup>1</sup>H NMR (400 MHz, CDCl<sub>3</sub>) δ 8.03 (d, *J* = 8.4 Hz, 1H), 7.65 (d, *J* = 8.0 Hz, 2H), 7.41 (t, *J* = 8.4 Hz, 1H), 7.37 (d, *J* = 7.6 Hz, 1H), 7.23 – 7.13 (m, 4H),

7.05 (t, *J* = 7.2 Hz, 1H), 6.97 (t, *J* = 8.8 Hz, 2H), 3.33 (dd, *J* = 21.2, 14.8 Hz, 2H), 2.38 (s, 3H), 0.55 (s, 3H).

- <sup>13</sup>C NMR (100 MHz, CDCl<sub>3</sub>) δ 164.3 (d, *J* = 248.9 Hz), 151.0, 143.8, 136.4, 136.3, 135.0, 133.3, 131.7, 129.6, 129.5, 127.1, 124.9, 123.3, 117.3, 115.5, 115.3, 76.7, 38.5, 21.5, -4.4.
- IR (neat) cm<sup>-1</sup> 2921, 1585, 1497, 1438, 1346, 1305, 1260, 1161, 1089, 1025, 939.
- HRMS calcd for C<sub>21</sub>H<sub>21</sub>FNO<sub>2</sub>SSi (M+H)<sup>+</sup>: 398.1041, found 398.1041.

### 3-(benzo[d][1,3]dioxol-5-yl)-3-methyl-1-tosyl-2,3-dihydro-1H-benzo[d][1,3]azasilole (3ar)

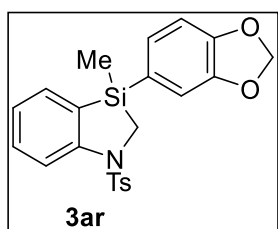

**3ar** was prepared according to General Method B. **1u** (100 mg, 0.23 mmol), **2a** (169 mg, 0.57 mmol, 2.5 equiv.), Cs<sub>2</sub>CO<sub>3</sub> (185 mg, 0.57 mmol, 2.5 equiv.) and 18-crown-6 (150 mg, 0.57 mmol, 2.5 equiv.) in DME (1.5 mL) at 25 °C for 10 h afforded **3ar** as a pale yellow solid (69 mg, 71%).

- R<sub>f</sub> = 0.1 (EtOAc/Petroleum Ether = 1/10).
- <sup>1</sup>H NMR (400 MHz, CDCl<sub>3</sub>) δ 8.02 (d, *J* = 8.4 Hz, 1H), 7.66 (d, *J* = 8.0 Hz, 2H), 7.52 – 7.31 (m, 2H), 7.20 (d, *J* = 8.0 Hz, 2H), 7.03 (t, *J* = 7.2

Hz, 1H), 6.76 (s, 2H), 6.56 (s, 1H), 5.92 (d, *J* = 4.0 Hz, 2H), 3.30 (dd, *J* = 16.4, 14.8 Hz, 2H), 2.37 (s, 3H), 0.51 (s, 3H).

- <sup>13</sup>C NMR (100 MHz, CDCl<sub>3</sub>) δ 151.0, 149.4, 147.7, 143.8, 134.9, 133.3, 131.6, 129.6, 128.8, 127.1, 126.7, 125.2, 123.2, 117.2, 113.4, 108.8, 100.8, 38.5, 21.5, -4.3.
- IR (neat) cm<sup>-1</sup> 3054, 2921, 1585, 1482, 1439, 1267, 1233, 1089.
- HRMS calcd for C<sub>22</sub>H<sub>22</sub>NO<sub>4</sub>SSi (M+H)<sup>+</sup>: 424.1033, found 424.1033.

### 3-methyl-3-(naphthalen-2-yl)-1-tosyl-2,3-dihydro-1H-benzo[d][1,3]azasilole (3as)

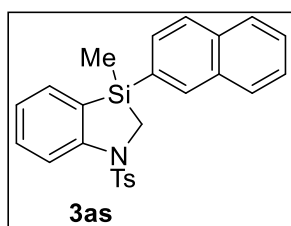

**3as** was prepared according to General Method B. **1v** (100 mg, 0.22 mmol), **2a** (167 mg, 0.56 mmol, 2.5 equiv.), Cs<sub>2</sub>CO<sub>3</sub> (183 mg, 0.56 mmol, 2.5 equiv.) and 18-crown-6 (148 mg, 0.56 mmol, 2.5 equiv.) in DME (1.5 mL) at 25 °C for 10 h afforded **3as** as a pale yellow oil (45 mg, 47%).

- R<sub>f</sub> = 0.2 (EtOAc/Petroleum Ether = 1/10).
- <sup>1</sup>H NMR (400 MHz, CDCl<sub>3</sub>) δ 8.06 (d, *J* = 8.8 Hz, 1H), 7.80 (d, *J* = 7.6 Hz, 1H), 7.77 (s, 1H), 7.75 – 7.69 (m, 2H), 7.65 (d, *J* = 8.0 Hz, 2H), 7.55 – 7.46 (m, 2H),

7.47 – 7.39 (m, 2H), 7.24 (d, *J* = 8.4 Hz, 1H), 7.14 (d, *J* = 8.0 Hz, 2H), 7.06 (t, *J* = 7.2 Hz, 1H), 3.42 (dd, *J* = 29.6, 14.8 Hz, 2H), 2.29 (s, 3H), 0.64 (s, 3H).

- <sup>13</sup>C NMR (100 MHz, CDCl<sub>3</sub>) δ 151.1, 143.7, 135.5, 135.0, 134.0, 133.5, 132.7, 131.7, 131.3, 129.6, 129.5, 128.1, 127.7, 127.5, 127.1, 127.1, 126.3, 125.2, 123.3, 117.3, 38.5, 21.4, -4.3.
- IR (neat) cm<sup>-1</sup> 3056, 2926, 1586, 1439, 1346, 1250, 1156, 1136, 1086, 1023.
- HRMS calcd for C<sub>25</sub>H<sub>24</sub>NO<sub>2</sub>SSi (M+H)<sup>+</sup>: 430.1292, found 430.1292.

### 1-tosyl-1,2-dihydrospiro[benzo[d][1,3]azasilole-3,1'-silinane] (3at)

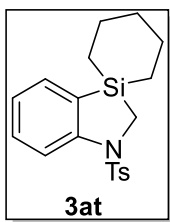

**3at** was prepared according to General Method B. **1w** (100 mg, 0.27 mmol), **2a** (200 mg, 0.67 mmol, 2.5 equiv.), Cs<sub>2</sub>CO<sub>3</sub> (218 mg, 0.67 mmol, 2.5 equiv.) and 18-crown-6 (177 mg, 0.67 mmol, 2.5 equiv.) in DME (1.5 mL) at 25 °C for 10 h afforded **3at** as a colorless oil (57 mg, 60%).

- R<sub>f</sub> = 0.4 (EtOAc/Petroleum Ether = 1/10).
- <sup>1</sup>H NMR (400 MHz, CDCl<sub>3</sub>) δ 7.90 (d, *J* = 8.4 Hz, 1H), 7.67 (d, *J* = 8.4 Hz, 2H), 7.47 (d, *J* = 7.2 Hz, 1H), 7.34 (t, *J* = 7.2 Hz, 1H), 7.23 (d, *J* = 7.6 Hz, 2H), 7.01 (t, *J* = 7.2 Hz, 1H), 3.21 (s, 2H), 2.36 (s, 3H), 1.99 – 1.78 (m, 2H), 1.75 – 1.62 (m, 2H), 1.56 – 1.40 (m, 2H), 1.01 – 0.58 (m, 4H).
- <sup>13</sup>C NMR (100 MHz, CDCl<sub>3</sub>) δ 150.6, 143.6, 135.2, 133.3, 131.3, 129.5, 127.1, 126.1, 122.8, 116.9, 36.7, 29.2, 24.9, 21.5, 12.2.
- IR (neat) cm<sup>-1</sup> 2917, 2849, 1586, 1460, 1439, 1346, 1161, 1134, 1090, 1027.
- HRMS calcd for C<sub>19</sub>H<sub>24</sub>NO<sub>2</sub>SSi (M+H)<sup>+</sup>: 358.1292, found 358.1290.



## 5. Enantioselective Synthesis of 1,3-N, Si-Reagent (**S**)-1p.

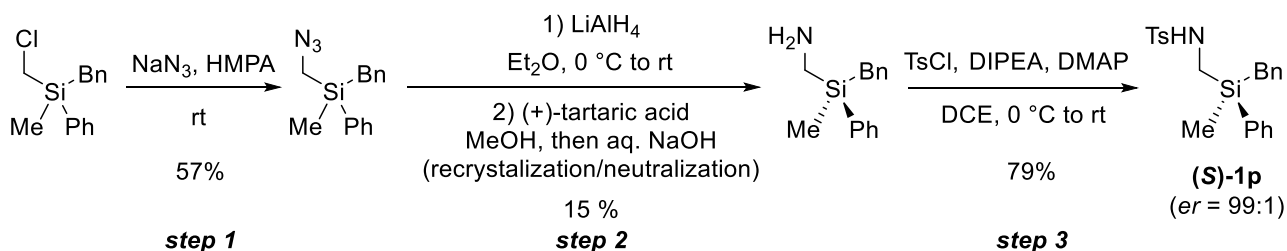

**Step 1:** To a solution of benzyl(chloromethyl)(methyl)(phenyl)silane (5.00 g, 19.17 mmol) in HMPA (30 mL) was added sodium azide (1.37 g, 21.09 mmol, 1.1 equiv.). The reaction was stirred for 5 h at room temperature before quenching with H<sub>2</sub>O and extracting with EtOAc (3 × 50 mL). The combined organic layers were washed with sat. aq. NaCl, dried over Na<sub>2</sub>SO<sub>4</sub> and concentrated under reduced pressure. The crude residue was purified by silica gel flash column chromatography (eluent: petroleum ether) to give (azidomethyl)(benzyl)(methyl)(phenyl)silane as a colorless oil (2.91 g, 57%).

**Step 2:** To a solution of (azidomethyl)(benzyl)(methyl)(phenyl)silane (2.91 g, 10.84 mmol) in anhydrous Et<sub>2</sub>O (30 mL) was added LiAlH<sub>4</sub> (13.01 mL, 1.0 M in THF, 1.2 equiv.) dropwise at 0 °C under argon atmosphere. The reaction was warmed up to room temperature and stirred for 30 min before quenching with sat. aq. potassium sodium tartrate solution and extracting with EtOAc (3 × 50 mL). The combined organic layers were washed with sat. aq. NaCl, dried over Na<sub>2</sub>SO<sub>4</sub> and concentrated under reduced pressure. The crude residue was purified by silica gel flash column chromatography (eluent/ methanol/CH<sub>2</sub>Cl<sub>2</sub> = 1/20) to give (benzyl(methyl)(phenyl)silyl)methanamine as a colorless oil (2.00 g, 76%).

To a solution of (+)-tartaric acid (1.24 g, 8.28 mmol, 1.0 equiv.) in methanol (90 mL) was added a solution of (benzyl(methyl)(phenyl)silyl)methanamine (2.00 g, 8.28 mmol) in methanol (3 mL). A white crystalline precipitate appeared immediately. The flask was then allowed to stand overnight at room temperature. The crystalline precipitate was filtered off, washed with a small amount of cooled methanol, and dried *in vacuo*. To the resulting salt was added a 10% aqueous solution of NaOH at 0 °C. The liberated amine was extracted with Et<sub>2</sub>O (3 × 30 mL), dried over Na<sub>2</sub>SO<sub>4</sub> and concentrated under reduced pressure. The crude residue was subjected to the above crystallization/ neutralization method for additional two times, affording (+)-(benzyl(methyl)(phenyl)silyl)methanamine as a colorless oil (400 mg, 20%). [ $\alpha$ ]<sub>D</sub><sup>25</sup> = +12.3 (*c* = 0.35, CHCl<sub>3</sub>)

**Step 3:** To a solution of (+)-(benzyl(methyl)(phenyl)silyl)methanamine (400 mg, 1.66 mmol) in anhydrous CH<sub>2</sub>Cl<sub>2</sub> (5 mL) was added tosyl chloride (474 mg, 2.49 mmol, 1.5 equiv.) and 4-dimethylaminopyridine (20 mg, 0.17 mmol, 0.1 equiv.) and *N,N*-diisopropylethylamine (428 mg, 3.31 mmol, 2.0 equiv.) at 0 °C under argon atmosphere. The reaction was warmed up to room temperature and stirred for 5 h before quenching with sat. aq. NaHCO<sub>3</sub> and extracting with CH<sub>2</sub>Cl<sub>2</sub> (3 × 15 mL). The combined organic layers were washed with sat. aq. NaCl, dried over Na<sub>2</sub>SO<sub>4</sub> and concentrated under reduced pressure. The crude residue was purified by silica gel flash column chromatography (eluent: EtOAc/petroleum ether = 1/6) to give (**S**)-**1p** as a white solid (517 mg, 79%, *er* = 99:1); [ $\alpha$ ]<sub>D</sub><sup>25</sup> = -3.7 (*c* = 0.35, CHCl<sub>3</sub>). The *er* of (**S**)-**1p** was determined on a Chiralpak® AS-H column with hexane/ 2-propanol = 89:11, wavelength = 220 nm, flow = 1 mL/min. Reaction times: 18.27 min [minor enantiomer], 22.80 min [major enantiomer].

## 6. Mechanistic Studies.

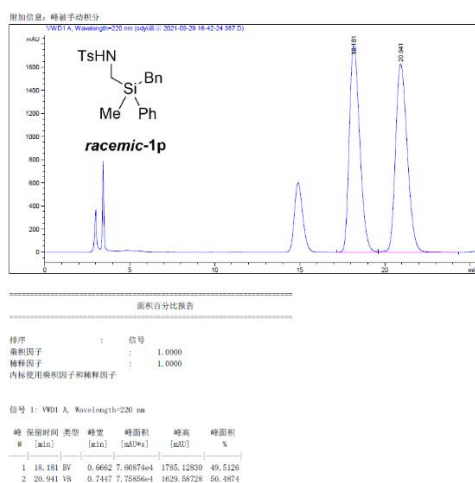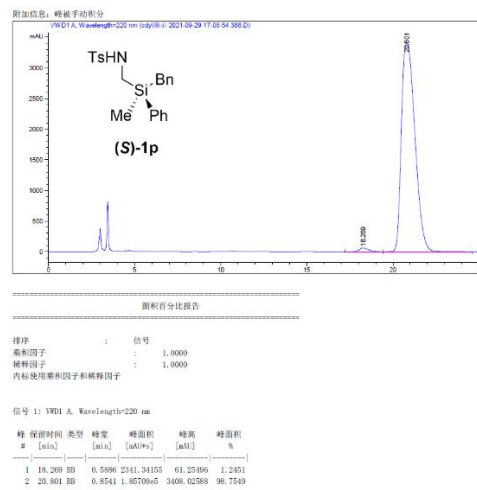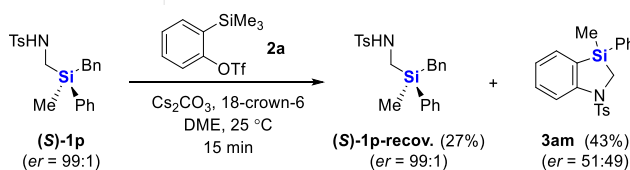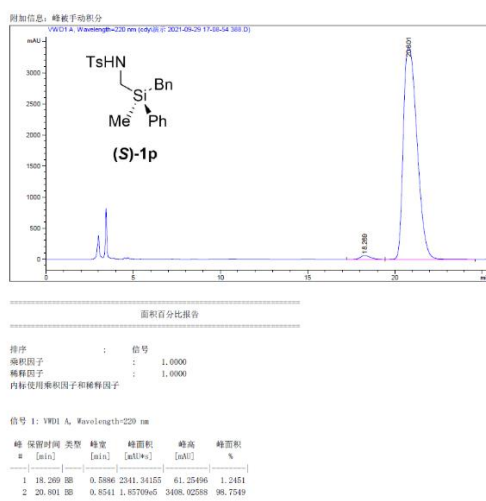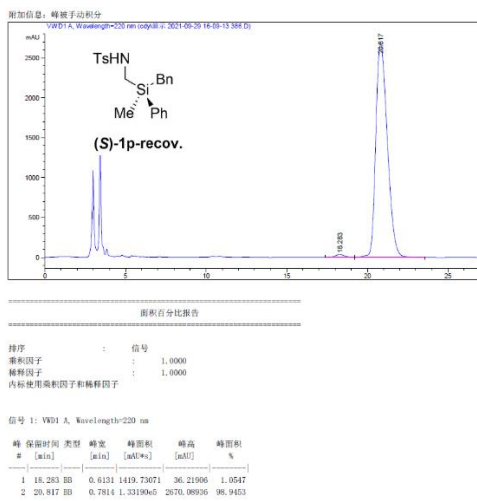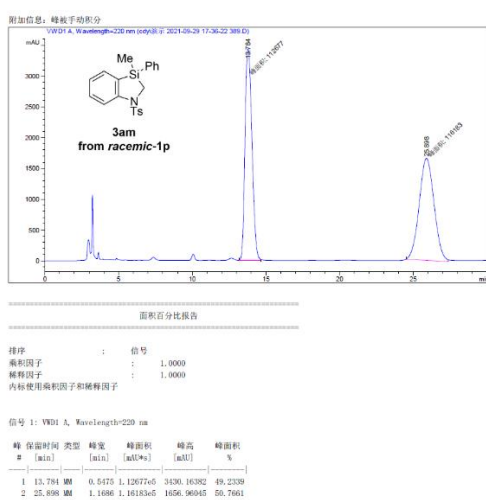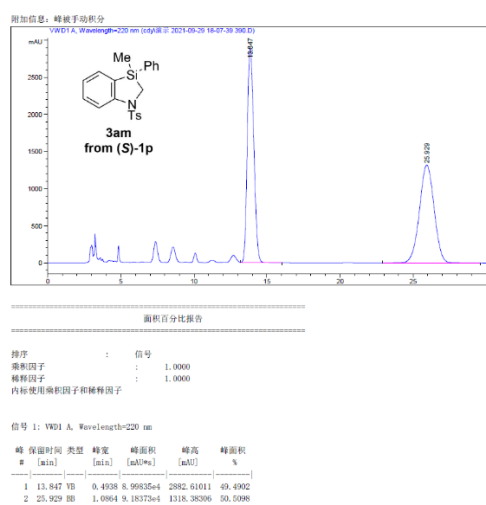

Note: The *er* of **3am** was determined on a Chiralpak® AS-H column with hexane/2-propanol = 80:20, wavelength = 220 nm, flow = 1 mL/min.

## 7. Functionalization of 3-Silaindoline 3

### 3,3-dimethyl-2,3-dihydro-1H-benzo[d][1,3]azasilole (8)

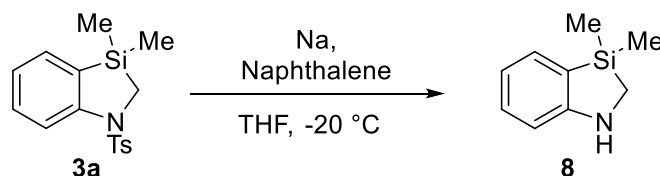

#### General Method D:

Naphthalene (472 mg, 3.69 mmol, 6.0 equiv.) was dissolved in anhydrous THF (3 mL) in an oven-dried, 10-mL Schlenk flask under a stream of argon, followed by the addition of lacerated and hexane-rinsed pieces of sodium metal (86 mg, 3.75 mmol, 6.1 equiv.). The mixture was stirred at 23 °C until a green color persisted. The reaction was cooled to -20 °C before addition of a solution of tosyl-protected silaindoline **3a** (195 mg, 0.62 mmol) in anhydrous THF (1 mL). The turbid orange reaction mixture was stirred at same temperature for 2 h until the reaction was completed. The reaction was slowly quenched with MeOH (3 mL) at 0 °C, followed by addition of sat. aq. NaHCO<sub>3</sub> solution only after complete consumption. The mixture was then diluted with hexanes (3 × 10 mL), washed with sat. aq. NaCl, dried over Na<sub>2</sub>SO<sub>4</sub> and concentrated under reduced pressure. The crude residue **8** was conducted next step without purification.

### 1-(3,3-dimethyl-2,3-dihydro-1H-benzo[d][1,3]azasilol-1-yl)-2-(4-isobutylphenyl)propan-1-one (9)

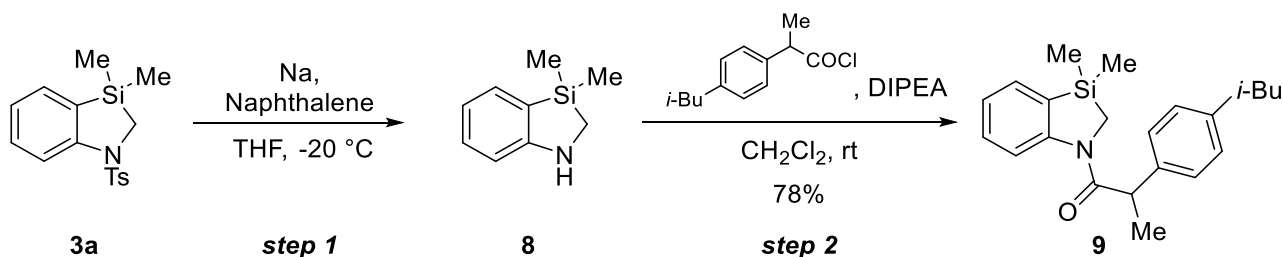

**Step 1:** **8** was prepared according to General Method D. Naphthalene (472 mg, 3.69 mmol, 6.0 equiv), sodium metal (86 mg, 3.75 mmol, 6.1 equiv), tosyl-protected silaindoline **3a** (195 mg, 0.61 mmol) in anhydrous THF (4 mL) at -20 °C for 2 h afforded **8** which was used in the next step without purification.

**Step 2:** To a solution of 2-(4-isobutylphenyl)propanoyl chloride which was prepared from ibuprofen (98 mg, 0.47 mmol, 0.77 equiv.), oxalyl chloride (90 mg, 0.71 mmol, 1.15 equiv.) and 2 drops of dry DMF in CH<sub>2</sub>Cl<sub>2</sub> (3 mL)<sup>20</sup> were added DIPEA (119 mg, 0.92 mmol, 1.5 equiv.) and a solution of **8** in CH<sub>2</sub>Cl<sub>2</sub> (0.5 mL). The reaction stirred at room temperature for 2 h before quenching with sat. aq. NaHCO<sub>3</sub> and extracting with CH<sub>2</sub>Cl<sub>2</sub> (3 × 30 mL). The combined organic layers were washed with sat. aq. NaCl, dried over Na<sub>2</sub>SO<sub>4</sub> and concentrated under reduced pressure. The crude residue was purified by silica gel flash column chromatography (eluent: EtOAc/petroleum ether = 1/30) to give **9** as a white solid (133 mg, 78%).

- R<sub>f</sub> = 0.3 (EtOAc/Petroleum Ether = 1/30).
- mp: 99.2 – 102.7 °C.
- <sup>1</sup>H NMR (400 MHz, CDCl<sub>3</sub>) δ 8.68 (s, 1H), 7.44 (d, *J* = 7.2 Hz, 1H), 7.38 (t, *J* = 8.0 Hz, 1H),

<sup>20</sup> N. Radhoff, A. Studer, *Angew. Chem. Int. Ed.*, **2021**, *60*, 3561.

7.23 (d,  $J = 8.0$  Hz, 2H), 7.14 – 7.04 (m, 3H), 4.18 (q,  $J = 6.8$  Hz, 1H), 3.32 – 2.93 (m, 2H), 2.44 (d,  $J = 7.2$  Hz, 2H), 1.83 (dp,  $J = 13.6, 6.8$  Hz, 1H), 1.52 (d,  $J = 6.8$  Hz, 3H), 0.87 (d,  $J = 6.4$  Hz, 6H), 0.36 (s, 3H), 0.13 (s, 3H).

- $^{13}\text{C}$  NMR (100 MHz,  $\text{CDCl}_3$ )  $\delta$  175.1, 152.0, 140.2, 139.1, 132.1, 130.9, 129.6, 127.1, 123.4, 120.2, 46.1, 45.0, 37.5, 30.2, 22.3, 21.1, -2.3, -2.3.
- IR (neat)  $\text{cm}^{-1}$  3050, 2954, 2867, 1653, 1584, 1461, 1438, 1270, 1132, 1060, 827.
- HRMS calcd for  $\text{C}_{22}\text{H}_{30}\text{NO}_3\text{Si}$  ( $\text{M}+\text{H}$ ) $^+$ : 352.2091, found 352.2091.

**((3*r*,5*r*,7*r*)-adamantan-1-yl)(3,3-dimethyl-2,3-dihydro-1*H*-benzo[*d*][1,3]azasilol-1-yl)methanone**  
**(10)**

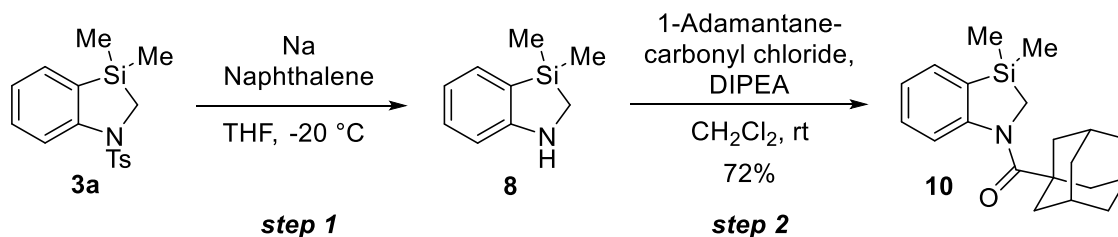

**Step 1:** **8** was prepared according to General Method D. Naphthalene (472 mg, 3.69 mmol, 6.0 equiv), sodium metal (86 mg, 3.75 mmol, 6.1 equiv), tosyl-protected silaindoline **3a** (195 mg, 0.61 mmol) in anhydrous THF (4mL) at  $-20$  °C for 2 h afforded **8** which was used in the next step without purification.

**Step 2:** To a solution of **8** in  $\text{CH}_2\text{Cl}_2$  (3 mL) was added 1-adamantanecarbonyl chloride (182 mg, 0.92 mmol, 1.5 equiv.) and DIPEA (238 mg, 1.84 mmol, 3.0 equiv.) under argon atmosphere. The reaction was stirred at room temperature for 2 h before quenching with sat. aq.  $\text{NaHCO}_3$  and extracting with  $\text{CH}_2\text{Cl}_2$  ( $3 \times 10$  mL). The combined organic layers were washed with sat. aq.  $\text{NaCl}$ , dried over  $\text{Na}_2\text{SO}_4$  and concentrated under reduced pressure. The crude residue was purified by silica gel flash column chromatography (eluent:  $\text{EtOAc}$ /petroleum ether = 1/30) to give **10** as a white solid (124 mg, 72%).

- $R_f = 0.4$  ( $\text{EtOAc}$ / petroleum ether = 1/10).
- mp : 148.2 – 151.7 °C.
- $^1\text{H}$  NMR (400 MHz,  $\text{CDCl}_3$ )  $\delta$  8.00 (d,  $J = 8.4$  Hz, 1H), 7.46 (d,  $J = 7.2$  Hz, 1H), 7.31 (t,  $J = 8.4$  Hz, 1H), 7.03 (t,  $J = 7.2$  Hz, 1H), 3.41 (s, 2H), 2.19 (s, 6H), 2.09 (s, 3H), 1.77 (s, 6H), 0.38 (s, 6H).
- $^{13}\text{C}$  NMR (100 MHz,  $\text{CDCl}_3$ )  $\delta$  178.6, 153.4, 131.8, 130.1, 127.7, 123.2, 121.7, 43.8, 39.7, 39.0, 36.7, 28.6, -2.7.
- IR (neat)  $\text{cm}^{-1}$  3006, 2903, 2989, 2847, 1632, 1584, 1324, 1275, 1261, 764, 725.
- HRMS calcd for  $\text{C}_{20}\text{H}_{28}\text{NOSi}$  ( $\text{M}+\text{H}$ ) $^+$ : 326.1935, found 326.1933.

**1-(3,5-dimethoxybenzyl)-3,3-dimethyl-2,3-dihydro-1*H*-benzo[*d*][1,3]azasilole** (**11**)

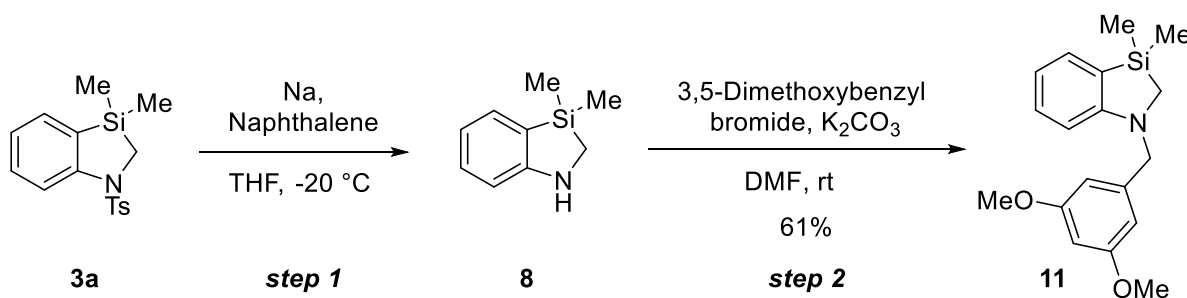

**Step 1:** **8** was prepared according to General Method D. Naphthalene (472 mg, 3.69 mmol, 6.0 equiv), sodium metal (86 mg, 3.75 mmol, 6.1 equiv), tosyl-protected silaindoline **3a** (195 mg, 0.61 mmol) in anhydrous THF (4mL) at -20 °C for 2 h afforded **8** which was used in the next step without purification.

**Step 2:** To a solution of **8** in DMF (3 mL) was added 3,5-dimethoxybenzyl bromide (156 mg, 0.67 mmol, 1.1 equiv.) and K<sub>2</sub>CO<sub>3</sub> (186 mg, 1.35 mmol, 2.2 equiv.) under argon atmosphere. The reaction was stirred for 3 h at room temperature before quenching with sat. aq. NaHCO<sub>3</sub> and extracting with EtOAc (3 × 10 mL). The combined organic layers were washed with sat. aq. NaCl, dried over Na<sub>2</sub>SO<sub>4</sub> and concentrated under reduced pressure. The crude residue was purified by silica gel flash column chromatography (eluent: EtOAc/petroleum ether = 1/30) to give **11** as a pale yellow oil (117 mg, 61%).

- R<sub>f</sub> = 0.7 (EtOAc/Petroleum Ether = 1/10).
- <sup>1</sup>H NMR (400 MHz, CDCl<sub>3</sub>) δ 7.37 (dd, *J* = 7.2, 1.6 Hz, 1H), 7.17 (ddd, *J* = 8.8, 7.2, 1.6 Hz, 1H), 6.61 (t, *J* = 7.2 Hz, 1H), 6.49 (d, *J* = 8.0 Hz, 1H), 6.40 (d, *J* = 2.0 Hz, 2H), 6.34 (t, *J* = 2.4 Hz, 1H), 4.41 (s, 2H), 3.75 (s, 6H), 2.69 (s, 2H), 0.35 (s, 6H).
- <sup>13</sup>C NMR (100 MHz, CDCl<sub>3</sub>) δ 161.0, 158.9, 141.6, 133.2, 131.3, 121.4, 115.7, 107.7, 104.9, 98.6, 55.2, 54.6, 41.3, -1.5.
- IR (neat) cm<sup>-1</sup> 3378, 2924, 2852, 1669, 1594, 1461, 1430, 1202, 1158, 1061, 829, 792.
- HRMS calcd for C<sub>18</sub>H<sub>24</sub>NO<sub>2</sub>Si (M+H)<sup>+</sup>: 314.1571, found 314.1567.

### 3,3-dimethyl-1-(pyridin-3-ylmethyl)-2,3-dihydro-1H-benzo[d][1,3]azasilole (12)

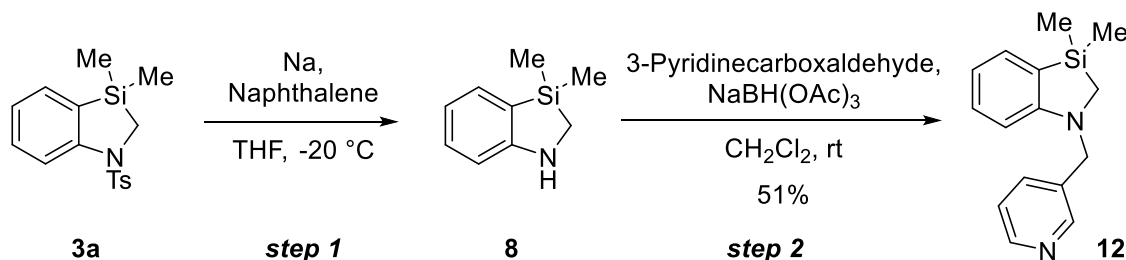

**Step 1:** **8** was prepared according to General Method D. Naphthalene (472 mg, 3.69 mmol, 6.0 equiv), sodium metal (86 mg, 3.75 mmol, 6.1 equiv), tosyl-protected silaindoline **3a** (195 mg, 0.61 mmol) in anhydrous THF (4mL) at -20 °C for 2 h afforded **8** which was used in the next step without purification.

**Step 2:** To a solution of **8** in CH<sub>2</sub>Cl<sub>2</sub> (3 mL) was added nicotinaldehyde (72 mg, 0.67 mmol, 1.1 equiv.) and NaBH(OAc)<sub>3</sub> (389 mg, 1.84 mmol, 3.0 equiv.) under argon atmosphere. The reaction was stirred at room temperature for 3 h before quenching with sat. aq. NaHCO<sub>3</sub> and extracting with CH<sub>2</sub>Cl<sub>2</sub> (3 × 10 mL). The combined organic layers were washed with sat. aq. NaCl, dried over Na<sub>2</sub>SO<sub>4</sub> and concentrated under reduced pressure. The crude residue was purified by silica gel flash column chromatography (eluent: EtOAc/petroleum ether = 1/5) to give **12** as a pale yellow oil (79 mg, 51%).

- R<sub>f</sub> = 0.4 (EtOAc/Petroleum Ether = 1/2).
- <sup>1</sup>H NMR (400 MHz, CDCl<sub>3</sub>) δ 8.53 (s, 1H), 8.51 (d, *J* = 4.4 Hz, 1H), 7.58 (d, *J* = 7.6 Hz, 1H), 7.39 (dd, *J* = 6.8, 1.2 Hz, 1H), 7.27 (t, *J* = 6.4 Hz, 1H), 7.19 (ddd, *J* = 8.4, 7.2, 1.6 Hz, 1H), 6.65 (t, *J* = 7.2 Hz, 1H), 6.50 (d, *J* = 8.4 Hz, 1H), 4.50 (s, 2H), 2.66 (s, 2H), 0.35 (s, 6H).
- <sup>13</sup>C NMR (100 MHz, CDCl<sub>3</sub>) δ 158.3, 147.5, 146.8, 136.5, 135.3, 133.4, 131.4, 124.0, 121.8, 116.5, 107.5, 52.2, 41.4, -1.6.

- IR (neat)  $\text{cm}^{-1}$  2954, 1735, 1674, 1587, 1472, 1425, 1351, 1247, 1187, 1026.
- HRMS calcd for  $\text{C}_{15}\text{H}_{19}\text{N}_2\text{Si}$  ( $\text{M}+\text{H}$ )<sup>+</sup>: 255.1312, found 255.1312.

**1-(3,3-dimethyl-2,3-dihydro-1H-benzo[d][1,3]azasilol-1-yl)ethan-1-one (13)**

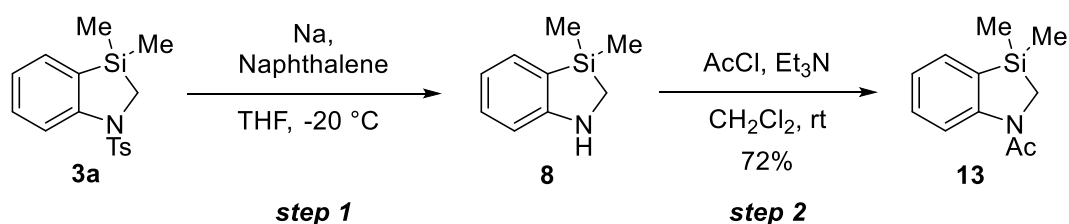

**Step 1:** **8** was prepared according to General Method D. Naphthalene (472 mg, 3.69 mmol, 6.0 equiv), sodium metal (86 mg, 3.75 mmol, 6.1 equiv), tosyl-protected silaindolines **3a** (195 mg, 0.61 mmol) in anhydrous THF (4 mL) at  $-20\text{ }^{\circ}\text{C}$  for 2 h afforded **8** which was used in the next step without purification.

**Step 2:** To a solution of **8** in  $\text{CH}_2\text{Cl}_2$  (3 mL) was added acetyl chloride (72 mg, 0.92 mmol, 1.5 equiv.) and  $\text{Et}_3\text{N}$  (186 mg, 1.84 mmol, 3.0 equiv.) under argon atmosphere. The reaction was stirred at room temperature for 2 h before quenching with sat. aq.  $\text{NaHCO}_3$  and extracting with  $\text{CH}_2\text{Cl}_2$  ( $3 \times 10\text{ mL}$ ). The combined organic layers were washed with sat. aq.  $\text{NaCl}$ , dried over  $\text{Na}_2\text{SO}_4$  and concentrated under reduced pressure. The crude residue was purified by silica gel flash column chromatography (eluent:  $\text{EtOAc}$ /petroleum ether = 1/6) to give **13** as a white solid (90 mg, 72%).

- $R_f = 0.3$  ( $\text{EtOAc}$ /Petroleum Ether = 1/4).
- mp:  $103.8 - 106.1\text{ }^{\circ}\text{C}$ .
- $^1\text{H NMR}$  (400 MHz,  $\text{CDCl}_3$ )  $\delta$  8.63 (s, 1H), 7.48 (dd,  $J = 7.2, 1.6\text{ Hz}$ , 1H), 7.37 (ddd,  $J = 8.8, 7.2, 1.6\text{ Hz}$ , 1H), 7.07 (td,  $J = 7.2, 1.2\text{ Hz}$ , 1H), 3.16 (s, 2H), 2.36 (s, 3H), 0.40 (s, 6H).
- $^{13}\text{C NMR}$  (100 MHz,  $\text{CDCl}_3$ )  $\delta$  172.0, 151.5, 132.2, 131.0, 123.3, 119.6, 38.8, 25.8, -2.0.
- IR (neat)  $\text{cm}^{-1}$  2916, 1658, 1582, 1461, 1432, 1375, 1225, 1132, 825, 751.
- HRMS calcd for  $\text{C}_{11}\text{H}_{16}\text{NOSi}$  ( $\text{M}+\text{H}$ )<sup>+</sup>: 206.0996, found 206.0996.

**N-(1-acetyl-3,3-dimethyl-2,3-dihydro-1H-benzo[d][1,3]azasilol-7-yl)-4-methylbenzenesulfonamide (14)**

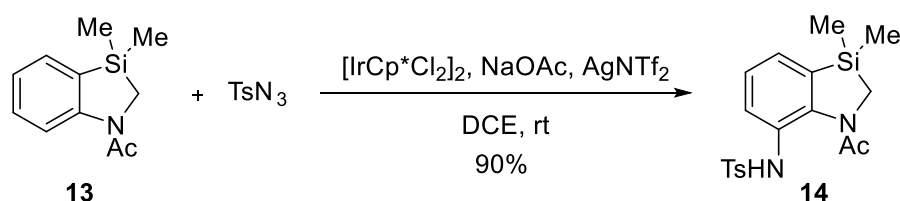

A sealed tube was charged with **13** (70 mg, 0.34 mmol), sulfonyl azide (101 mg, 0.51 mmol, 1.5 equiv.),  $[\text{IrCp}^*\text{Cl}_2]_2$  (5 mg, 0.01 mmol, 2 mol %),  $\text{AgNTf}_2$  (10 mg, 0.03 mmol, 8 mol %),  $\text{NaOAc}$  (8 mg, 0.10 mmol, 30 mol %) and DCE (1.5 mL). The mixture was stirred at room temperature for 6 h. After the completion of the reaction, the solvent was evaporated under reduced pressure. The residue was purified by silica gel flash column chromatography (eluent:  $\text{EtOAc}$ /petroleum ether = 1/4) to give the product **14** as a white solid (115 mg, 90%).

- $R_f = 0.2$  ( $\text{EtOAc}$ /Petroleum Ether = 1/2).
- mp:  $164.0 - 165.8\text{ }^{\circ}\text{C}$ .

- $^1\text{H}$  NMR (400 MHz,  $\text{CDCl}_3$ )  $\delta$  8.18 (s, 1H), 7.51 (dd,  $J = 7.6, 1.6$  Hz, 1H), 7.39 (d,  $J = 8.0$  Hz, 2H), 7.36 (dd,  $J = 7.2, 1.2$  Hz, 1H), 7.25 (t,  $J = 7.6$  Hz, 1H), 7.16 (d,  $J = 8.0$  Hz, 2H), 2.63 (s, 2H), 2.38 (s, 3H), 2.15 (s, 3H), 0.30 (s, 6H).
- $^{13}\text{C}$  NMR (100 MHz,  $\text{CDCl}_3$ )  $\delta$  170.7, 144.7, 142.8, 137.9, 132.1, 131.6, 130.8, 129.0, 127.9, 126.9, 126.8, 41.7, 24.8, 21.4, -3.2.
- IR (neat)  $\text{cm}^{-1}$  3007, 1624, 1598, 1493, 1416, 1345, 1302, 1276, 1162, 1091, 835.
- HRMS calcd for  $\text{C}_{18}\text{H}_{23}\text{N}_2\text{O}_3\text{SSi}$  ( $\text{M}+\text{H}$ ) $^+$ : 375.1193, found 375.1193.

**1-(5-bromo-3,3-dimethyl-2,3-dihydro-1H-benzo[d][1,3]azasilol-1-yl)ethan-1-one (15)**

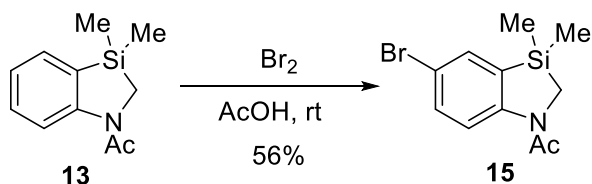

To a solution of **13** (1.00 g, 4.87 mmol) in AcOH (8 mL) was added a solution of bromine (778 mg, 4.87 mmol, 1.0 equiv.) in AcOH (2 mL) dropwise at room temperature. The reaction was stirred for 3 h before quenching with  $\text{H}_2\text{O}$  and extracting with EtOAc ( $3 \times 20$  mL). The combined organic layers were washed with sat. aq. NaCl, dried over  $\text{Na}_2\text{SO}_4$  and concentrated under reduced pressure. The crude residue was purified by silica gel flash column chromatography (eluent: EtOAc/petroleum ether = 1/8) to give **15** as a white solid (773 mg, 56%).

- $R_f = 0.5$  (EtOAc/Petroleum Ether = 1/4).
- mp: 92.5 – 94.0  $^\circ\text{C}$ .
- $^1\text{H}$  NMR (400 MHz,  $\text{CDCl}_3$ )  $\delta$  8.53 (s, 1H), 7.54 (d,  $J = 2.4$  Hz, 1H), 7.44 (dd,  $J = 9.2, 2.4$  Hz, 1H), 3.16 (s, 2H), 2.35 (s, 3H), 0.41 (s, 6H).
- $^{13}\text{C}$  NMR (100 MHz,  $\text{CDCl}_3$ )  $\delta$  172.1, 150.4, 134.6, 133.7, 121.5, 116.4, 38.9, 25.8, -2.0.
- IR (neat)  $\text{cm}^{-1}$  2956, 1656, 1574, 1448, 1369, 1287, 1183, 1083, 1061, 655.
- HRMS calcd for  $\text{C}_{11}\text{H}_{15}\text{BrNOSi}$  ( $\text{M}+\text{H}$ ) $^+$ : 284.0101, found 284.0100.

**methyl (E)-3-(1-acetyl-3,3-dimethyl-2,3-dihydro-1H-benzo[d][1,3]azasilol-5-yl)acrylate (16)**

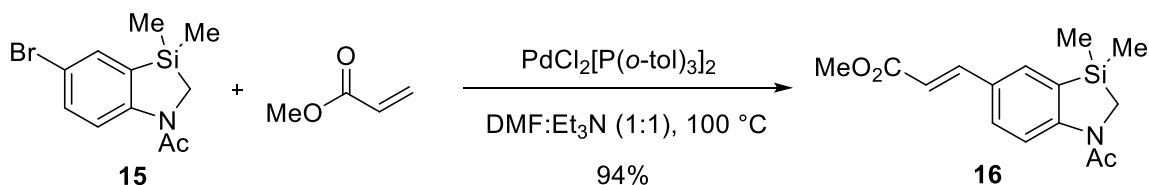

A sealed tube was charged with **15** (50 mg, 0.18 mmol), methyl acrylate (76 mg, 0.88 mmol, 5.0 equiv.),  $\text{PdCl}_2[\text{P}(o\text{-tol})_3]_2$  (35 mg, 0.04 mmol, 25 mol %), DMF and  $\text{H}_2\text{O}$  (1:1, 1 mL) under argon atmosphere. The mixture was stirred at 100  $^\circ\text{C}$  for 16 h before quenching with  $\text{H}_2\text{O}$  and extracting with EtOAc ( $3 \times 10$  mL). The combined organic layers were washed with sat. aq. NaCl, dried over  $\text{Na}_2\text{SO}_4$  and concentrated under reduced pressure. The crude residue was purified by silica gel flash column chromatography (eluent: EtOAc/petroleum ether = 1/5) to give **16** as a white solid (48 mg, 94%).

- $R_f = 0.3$  (EtOAc/Petroleum Ether = 1/4).

- mp: 154.4 – 156.2 °C.
- <sup>1</sup>H NMR (400 MHz, CDCl<sub>3</sub>) δ 8.59 (s, 1H), 7.66 (d, *J* = 15.6 Hz, 1H), 7.62 (d, *J* = 2.0 Hz, 1H), 7.54 (dd, *J* = 8.8, 2.4 Hz, 1H), 6.38 (d, *J* = 16.0 Hz, 1H), 3.79 (s, 3H), 3.18 (s, 2H), 2.37 (s, 3H), 0.42 (s, 6H).
- <sup>13</sup>C NMR (100 MHz, CDCl<sub>3</sub>) δ 172.3, 167.7, 153.2, 144.3, 132.3, 131.1, 129.3, 128.0, 119.8, 116.1, 51.6, 39.1, 25.9, -2.0.
- IR (neat) cm<sup>-1</sup> 2950, 1711, 1663, 1631, 1591, 1462, 1371, 1319, 1260, 1167, 831.
- HRMS calcd for C<sub>15</sub>H<sub>20</sub>NO<sub>3</sub>Si (M+H)<sup>+</sup>: 290.1207, found 290.1209.

**1-(3,3-dimethyl-5-(4,4,5,5-tetramethyl-1,3,2-dioxaborolan-2-yl)-2,3-dihydro-1H-benzo[d][1,3]-azasilol-1-yl)ethan-1-one (17)**

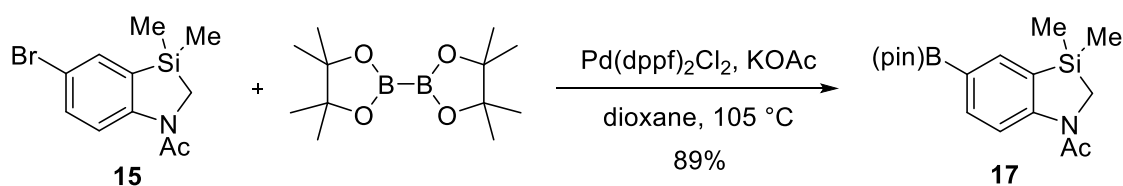

A sealed tube was charged with **15** (60 mg, 0.21 mmol), bis(pinacolato)diboron (107 mg, 0.42 mmol, 2.0 equiv.), Pd(dppf)<sub>2</sub>Cl<sub>2</sub> (17 mg, 0.02 mmol, 10 mol %), KOAc (103 mg, 1.06 mmol, 5.0 equiv.) and dioxane (1.5 mL) under argon atmosphere. The mixture was stirred at 105 °C for 2 h before quenching with H<sub>2</sub>O and extracting with EtOAc (3 × 10 mL). The combined organic layers were washed with sat. aq. NaCl, dried over Na<sub>2</sub>SO<sub>4</sub> and concentrated under reduced pressure. The crude residue was purified by silica gel flash column chromatography (eluent: EtOAc/petroleum ether = 1/5) to give **17** as a white solid (62 mg, 89%).

- R<sub>f</sub> = 0.3 (EtOAc/Petroleum Ether = 1/4).
- mp: 231.0 – 233.8 °C.
- <sup>1</sup>H NMR (400 MHz, CDCl<sub>3</sub>) δ 8.55 (s, 1H), 7.94 (d, *J* = 1.6 Hz, 1H), 7.82 (dd, *J* = 8.4, 1.6 Hz, 1H), 3.15 (s, 1H), 2.36 (s, 2H), 1.34 (s, 12H), 0.39 (s, 6H).
- <sup>13</sup>C NMR (100 MHz, CDCl<sub>3</sub>) δ 172.3, 154.1, 139.4, 138.0, 118.7, 83.7, 38.9, 25.9, 24.8, -1.9.
- IR (neat) cm<sup>-1</sup> 2977, 1658, 1595, 1398, 1352, 1331, 1261, 1186, 1110, 963, 826.
- HRMS calcd for C<sub>17</sub>H<sub>27</sub>BNO<sub>3</sub>Si (M+H)<sup>+</sup>: 322.1848, found 322.1848.



## 8. X-Ray Crystallographic Data of 3a and (S)-1p

### ➤ Compound 3a

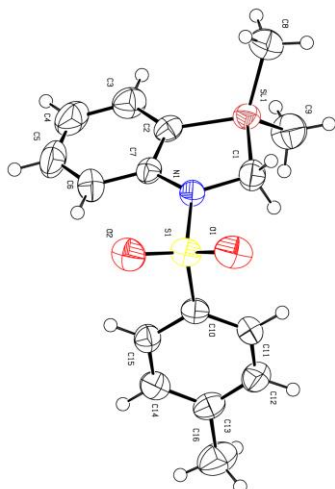

**Table 1** Crystal data and structure refinement for **3a**.

|                                    |                                                               |
|------------------------------------|---------------------------------------------------------------|
| Identification code                | <b>3a</b>                                                     |
| Empirical formula                  | C <sub>16</sub> H <sub>19</sub> NO <sub>2</sub> SSi           |
| Formula weight                     | 317.47                                                        |
| Temperature/K                      | 293.15                                                        |
| Crystal system                     | orthorhombic                                                  |
| Space group                        | P2 <sub>1</sub> 2 <sub>1</sub> 2 <sub>1</sub>                 |
| a/Å                                | 9.4608(5)                                                     |
| b/Å                                | 11.5644(5)                                                    |
| c/Å                                | 14.9921(10)                                                   |
| α/°                                | 90                                                            |
| β/°                                | 90                                                            |
| γ/°                                | 90                                                            |
| Volume/Å <sup>3</sup>              | 1640.27(15)                                                   |
| Z                                  | 4                                                             |
| ρ <sub>calc</sub> /cm <sup>3</sup> | 1.286                                                         |
| μ/mm <sup>-1</sup>                 | 0.274                                                         |
| F(000)                             | 672.0                                                         |
| Crystal size/mm <sup>3</sup>       | 0.35 × 0.3 × 0.25                                             |
| Radiation                          | MoKα (λ = 0.71073)                                            |
| 2θ range for data collection/°     | 6.192 to 52.738                                               |
| Index ranges                       | -11 ≤ h ≤ 9, -14 ≤ k ≤ 9, -18 ≤ l ≤ 13                        |
| Reflections collected              | 4691                                                          |
| Independent reflections            | 3071 [R <sub>int</sub> = 0.0243, R <sub>sigma</sub> = 0.0513] |
| Data/restraints/parameters         | 3071/0/193                                                    |
| Goodness-of-fit on F <sup>2</sup>  | 1.033                                                         |

|                                                |                                  |
|------------------------------------------------|----------------------------------|
| Final R indexes [ $I \geq 2\sigma(I)$ ]        | $R_1 = 0.0438$ , $wR_2 = 0.0901$ |
| Final R indexes [all data]                     | $R_1 = 0.0562$ , $wR_2 = 0.0982$ |
| Largest diff. peak/hole / $e \text{ \AA}^{-3}$ | 0.21/-0.25                       |
| Flack parameter                                | -0.06(7)                         |

**Table 2 Fractional Atomic Coordinates ( $\times 10^4$ ) and Equivalent Isotropic Displacement Parameters ( $\text{\AA}^2 \times 10^3$ ) for 3a.  $U_{eq}$  is defined as 1/3 of the trace of the orthogonalised  $U_{ij}$  tensor.**

| Atom | x          | y         | z          | $U_{eq}$ |
|------|------------|-----------|------------|----------|
| S1   | 4588.1(10) | 5676.8(8) | 7199.0(7)  | 43.4(3)  |
| Si1  | 8635.4(11) | 4117.4(9) | 7552.1(8)  | 42.3(3)  |
| O1   | 4097(3)    | 5490(3)   | 8085.7(19) | 59.6(8)  |
| O2   | 4394(3)    | 6779(2)   | 6787(2)    | 57.2(8)  |
| N1   | 6295(3)    | 5401(2)   | 7220(2)    | 36.3(7)  |
| C1   | 6735(4)    | 4454(4)   | 7830(3)    | 52.0(11) |
| C2   | 8571(4)    | 5100(3)   | 6578(2)    | 39.8(9)  |
| C3   | 9598(5)    | 5320(4)   | 5939(3)    | 57.2(11) |
| C4   | 9343(6)    | 6078(5)   | 5245(3)    | 69.6(14) |
| C5   | 8066(6)    | 6626(4)   | 5192(3)    | 67.5(15) |
| C6   | 7016(5)    | 6436(4)   | 5823(3)    | 52.7(11) |
| C7   | 7261(4)    | 5659(3)   | 6516(2)    | 36.4(8)  |
| C8   | 9903(5)    | 4572(4)   | 8429(3)    | 69.5(14) |
| C9   | 8952(5)    | 2571(3)   | 7275(4)    | 68.6(14) |
| C10  | 3787(4)    | 4627(3)   | 6513(3)    | 38.2(9)  |
| C11  | 3404(4)    | 3563(3)   | 6865(3)    | 49.1(10) |
| C12  | 2756(4)    | 2766(4)   | 6323(3)    | 55.2(12) |
| C13  | 2438(4)    | 3000(4)   | 5439(3)    | 47.0(10) |
| C14  | 2832(4)    | 4064(4)   | 5102(3)    | 47.3(10) |
| C15  | 3506(4)    | 4873(3)   | 5623(3)    | 42.3(9)  |
| C16  | 1666(6)    | 2126(5)   | 4870(3)    | 75.6(16) |

**Table 3 Anisotropic Displacement Parameters ( $\text{\AA}^2 \times 10^3$ ) for 3a. The Anisotropic displacement factor exponent takes the form:  $-2\pi^2[h^2a^{*2}U_{11}+2hka^*b^*U_{12}+\dots]$ .**

| Atom | $U_{11}$ | $U_{22}$ | $U_{33}$ | $U_{23}$  | $U_{13}$ | $U_{12}$ |
|------|----------|----------|----------|-----------|----------|----------|
| S1   | 39.9(5)  | 44.5(5)  | 45.7(6)  | -9.3(5)   | 2.9(4)   | 8.7(5)   |
| Si1  | 37.3(5)  | 38.2(5)  | 51.5(7)  | 1.5(5)    | -4.2(5)  | 0.0(5)   |
| O1   | 48.5(17) | 84(2)    | 46.5(16) | -17.1(16) | 12.4(14) | 8.9(15)  |
| O2   | 60.7(18) | 36.0(14) | 75(2)    | -8.8(14)  | -7.1(16) | 14.8(13) |
| N1   | 35.2(15) | 36.3(15) | 37.4(16) | 1.5(14)   | 2.4(14)  | 2.1(13)  |
| C1   | 46(2)    | 53(2)    | 57(3)    | 15(2)     | 5(2)     | 2.6(19)  |
| C2   | 41(2)    | 38(2)    | 40(2)    | -8.4(17)  | 4.1(18)  | -5.2(18) |

|     |          |          |          |          |         |          |
|-----|----------|----------|----------|----------|---------|----------|
| C3  | 47(2)    | 69(3)    | 56(3)    | -4(2)    | 10(2)   | -2(2)    |
| C4  | 67(3)    | 86(4)    | 56(3)    | 2(3)     | 16(3)   | -23(3)   |
| C5  | 96(4)    | 61(3)    | 45(3)    | 11(2)    | 3(3)    | -26(3)   |
| C6  | 61(3)    | 47(2)    | 51(3)    | 9(2)     | 0(2)    | 1(2)     |
| C7  | 44(2)    | 31.6(19) | 33.8(19) | -4.0(17) | 0.1(16) | -5.4(17) |
| C8  | 70(3)    | 74(3)    | 64(3)    | 3(3)     | -18(3)  | -9(2)    |
| C9  | 67(3)    | 42(2)    | 96(4)    | -3(3)    | -3(3)   | 10(2)    |
| C10 | 32.0(19) | 41(2)    | 42(2)    | -3.2(17) | 2.3(17) | 4.7(16)  |
| C11 | 47(2)    | 51(2)    | 48(2)    | 12(2)    | -8(2)   | -1.6(19) |
| C12 | 53(3)    | 46(2)    | 66(3)    | 7(2)     | -2(2)   | -7(2)    |
| C13 | 38(2)    | 50(2)    | 53(3)    | -8(2)    | 7.2(19) | -4(2)    |
| C14 | 41(2)    | 61(3)    | 39(2)    | -2(2)    | 4.3(18) | 3(2)     |
| C15 | 39(2)    | 45(2)    | 44(2)    | 4.0(18)  | 5.5(19) | 3.1(19)  |
| C16 | 75(4)    | 77(4)    | 75(4)    | -17(3)   | 4(3)    | -23(3)   |

**Table 4 Bond Lengths for 3a.**

| Atom | Atom | Length/Å | Atom | Atom | Length/Å |
|------|------|----------|------|------|----------|
| S1   | O1   | 1.425(3) | C3   | C4   | 1.382(7) |
| S1   | O2   | 1.429(3) | C4   | C5   | 1.367(7) |
| S1   | N1   | 1.647(3) | C5   | C6   | 1.389(6) |
| S1   | C10  | 1.763(4) | C6   | C7   | 1.393(5) |
| Si1  | C1   | 1.887(4) | C10  | C11  | 1.387(5) |
| Si1  | C2   | 1.851(4) | C10  | C15  | 1.389(5) |
| Si1  | C8   | 1.856(4) | C11  | C12  | 1.373(6) |
| Si1  | C9   | 1.861(4) | C12  | C13  | 1.386(5) |
| N1   | C1   | 1.485(5) | C13  | C14  | 1.381(5) |
| N1   | C7   | 1.427(4) | C13  | C16  | 1.511(6) |
| C2   | C3   | 1.387(5) | C14  | C15  | 1.376(5) |
| C2   | C7   | 1.401(5) |      |      |          |

**Table 5 Bond Angles for 3a.**

| Atom | Atom | Atom | Angle/°    | Atom | Atom | Atom | Angle/°  |
|------|------|------|------------|------|------|------|----------|
| O1   | S1   | O2   | 119.80(18) | C7   | C2   | Si1  | 111.4(3) |
| O1   | S1   | N1   | 105.82(17) | C4   | C3   | C2   | 120.9(4) |
| O1   | S1   | C10  | 107.45(18) | C5   | C4   | C3   | 119.5(5) |
| O2   | S1   | N1   | 107.91(16) | C4   | C5   | C6   | 121.3(5) |
| O2   | S1   | C10  | 107.86(17) | C5   | C6   | C7   | 119.4(4) |
| N1   | S1   | C10  | 107.44(16) | C2   | C7   | N1   | 114.9(3) |
| C2   | Si1  | C1   | 90.91(17)  | C6   | C7   | N1   | 125.4(3) |
| C2   | Si1  | C8   | 114.0(2)   | C6   | C7   | C2   | 119.6(4) |

|    |     |     |          |     |     |     |          |
|----|-----|-----|----------|-----|-----|-----|----------|
| C2 | Si1 | C9  | 114.8(2) | C11 | C10 | S1  | 120.1(3) |
| C8 | Si1 | C1  | 113.7(2) | C11 | C10 | C15 | 119.8(4) |
| C8 | Si1 | C9  | 109.1(2) | C15 | C10 | S1  | 120.1(3) |
| C9 | Si1 | C1  | 113.7(2) | C12 | C11 | C10 | 119.1(4) |
| C1 | N1  | S1  | 115.4(2) | C11 | C12 | C13 | 122.1(4) |
| C7 | N1  | S1  | 125.0(2) | C12 | C13 | C16 | 121.0(4) |
| C7 | N1  | C1  | 115.5(3) | C14 | C13 | C12 | 117.8(4) |
| N1 | C1  | Si1 | 106.4(2) | C14 | C13 | C16 | 121.3(4) |
| C3 | C2  | Si1 | 129.3(3) | C15 | C14 | C13 | 121.5(4) |
| C3 | C2  | C7  | 119.3(4) | C14 | C15 | C10 | 119.7(4) |

**Table 6 Torsion Angles for 3a.**

| A   | B   | C   | D   | Angle/°    | A   | B   | C   | D   | Angle/°   |
|-----|-----|-----|-----|------------|-----|-----|-----|-----|-----------|
| S1  | N1  | C1  | Si1 | 168.62(18) | C3  | C2  | C7  | N1  | -178.2(3) |
| S1  | N1  | C7  | C2  | -164.7(3)  | C3  | C2  | C7  | C6  | -0.8(5)   |
| S1  | N1  | C7  | C6  | 18.1(5)    | C3  | C4  | C5  | C6  | 0.0(8)    |
| S1  | C10 | C11 | C12 | 178.8(3)   | C4  | C5  | C6  | C7  | -1.0(7)   |
| S1  | C10 | C15 | C14 | -177.5(3)  | C5  | C6  | C7  | N1  | 178.4(4)  |
| Si1 | C2  | C3  | C4  | 179.0(3)   | C5  | C6  | C7  | C2  | 1.4(6)    |
| Si1 | C2  | C7  | N1  | 2.5(4)     | C7  | N1  | C1  | Si1 | 10.4(4)   |
| Si1 | C2  | C7  | C6  | 179.9(3)   | C7  | C2  | C3  | C4  | -0.1(6)   |
| O1  | S1  | N1  | C1  | 35.0(3)    | C8  | Si1 | C1  | N1  | 109.6(3)  |
| O1  | S1  | N1  | C7  | -169.0(3)  | C8  | Si1 | C2  | C3  | 67.3(4)   |
| O1  | S1  | C10 | C11 | -28.5(4)   | C8  | Si1 | C2  | C7  | -113.5(3) |
| O1  | S1  | C10 | C15 | 149.9(3)   | C9  | Si1 | C1  | N1  | -124.9(3) |
| O2  | S1  | N1  | C1  | 164.4(3)   | C9  | Si1 | C2  | C3  | -59.5(4)  |
| O2  | S1  | N1  | C7  | -39.7(3)   | C9  | Si1 | C2  | C7  | 119.7(3)  |
| O2  | S1  | C10 | C11 | -159.0(3)  | C10 | S1  | N1  | C1  | -79.5(3)  |
| O2  | S1  | C10 | C15 | 19.5(4)    | C10 | S1  | N1  | C7  | 76.4(3)   |
| N1  | S1  | C10 | C11 | 84.9(3)    | C10 | C11 | C12 | C13 | -1.7(6)   |
| N1  | S1  | C10 | C15 | -96.6(3)   | C11 | C10 | C15 | C14 | 0.9(6)    |
| C1  | Si1 | C2  | C3  | -176.2(4)  | C11 | C12 | C13 | C14 | 1.8(6)    |
| C1  | Si1 | C2  | C7  | 3.0(3)     | C11 | C12 | C13 | C16 | -177.2(4) |
| C1  | N1  | C7  | C2  | -8.8(4)    | C12 | C13 | C14 | C15 | -0.5(6)   |
| C1  | N1  | C7  | C6  | 174.0(4)   | C13 | C14 | C15 | C10 | -0.8(6)   |
| C2  | Si1 | C1  | N1  | -7.2(3)    | C15 | C10 | C11 | C12 | 0.3(6)    |
| C2  | C3  | C4  | C5  | 0.5(7)     | C16 | C13 | C14 | C15 | 178.5(4)  |

**Table 7 Hydrogen Atom Coordinates ( $\text{\AA}\times 10^4$ ) and Isotropic Displacement Parameters ( $\text{\AA}^2\times 10^3$ ) for 3a.**

| Atom | x     | y    | z    | U(eq) |
|------|-------|------|------|-------|
| H1A  | 6147  | 3777 | 7740 | 62    |
| H1B  | 6650  | 4698 | 8446 | 62    |
| H3   | 10469 | 4951 | 5979 | 69    |
| H4   | 10036 | 6215 | 4818 | 84    |
| H5   | 7896  | 7136 | 4725 | 81    |
| H6   | 6157  | 6824 | 5784 | 63    |
| H8A  | 9725  | 5362 | 8589 | 104   |
| H8B  | 10851 | 4500 | 8207 | 104   |
| H8C  | 9790  | 4089 | 8945 | 104   |
| H9A  | 8978  | 2124 | 7814 | 103   |
| H9B  | 9838  | 2497 | 6968 | 103   |
| H9C  | 8203  | 2293 | 6899 | 103   |
| H11  | 3583  | 3392 | 7460 | 59    |
| H12  | 2523  | 2046 | 6557 | 66    |
| H14  | 2637  | 4237 | 4509 | 57    |
| H15  | 3773  | 5580 | 5381 | 51    |
| H16A | 1461  | 2460 | 4298 | 113   |
| H16B | 799   | 1910 | 5158 | 113   |
| H16C | 2248  | 1454 | 4792 | 113   |

➤ **Compound (S)-1p**

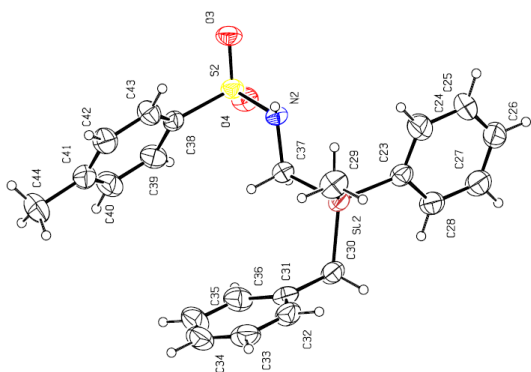

**Table 1 Crystal data and structure refinement for (S)-1p.**

|                     |                       |
|---------------------|-----------------------|
| Identification code | <b>(S)-1p</b>         |
| Empirical formula   | $C_{22}H_{25}NO_2SSi$ |
| Formula weight      | 395.58                |
| Temperature/K       | 293.15                |
| Crystal system      | triclinic             |
| Space group         | P1                    |
| a/Å                 | 9.2196(8)             |

|                                                |                                                               |
|------------------------------------------------|---------------------------------------------------------------|
| b/Å                                            | 10.7779(7)                                                    |
| c/Å                                            | 11.4849(8)                                                    |
| $\alpha/^\circ$                                | 74.785(6)                                                     |
| $\beta/^\circ$                                 | 87.069(6)                                                     |
| $\gamma/^\circ$                                | 82.553(6)                                                     |
| Volume/Å <sup>3</sup>                          | 1091.76(14)                                                   |
| Z                                              | 2                                                             |
| $\rho_{\text{calc}}/\text{cm}^3$               | 1.203                                                         |
| $\mu/\text{mm}^{-1}$                           | 0.219                                                         |
| F(000)                                         | 420.0                                                         |
| Crystal size/mm <sup>3</sup>                   | 0.35 × 0.3 × 0.25                                             |
| Radiation                                      | MoK $\alpha$ ( $\lambda = 0.71073$ )                          |
| 2 $\Theta$ range for data collection/ $^\circ$ | 6.048 to 52.744                                               |
| Index ranges                                   | -11 ≤ h ≤ 11, -8 ≤ k ≤ 13, -14 ≤ l ≤ 14                       |
| Reflections collected                          | 9039                                                          |
| Independent reflections                        | 5843 [R <sub>int</sub> = 0.0228, R <sub>sigma</sub> = 0.0451] |
| Data/restraints/parameters                     | 5843/3/499                                                    |
| Goodness-of-fit on F <sup>2</sup>              | 0.884                                                         |
| Final R indexes [ $I \geq 2\sigma(I)$ ]        | R <sub>1</sub> = 0.0463, wR <sub>2</sub> = 0.1216             |
| Final R indexes [all data]                     | R <sub>1</sub> = 0.0679, wR <sub>2</sub> = 0.1454             |
| Largest diff. peak/hole / e Å <sup>-3</sup>    | 0.18/-0.25                                                    |
| Flack parameter                                | 0.00(4)                                                       |

**Table 2 Fractional Atomic Coordinates ( $\times 10^4$ ) and Equivalent Isotropic Displacement Parameters ( $\text{\AA}^2 \times 10^3$ ) for (S)-1p.  $U_{\text{eq}}$  is defined as 1/3 of of the trace of the orthogonalised  $U_{\text{ij}}$  tensor.**

| Atom | x          | y          | z          | U(eq)    |
|------|------------|------------|------------|----------|
| S2   | 5041.9(13) | 4917.6(11) | 3094.1(11) | 53.5(4)  |
| S1   | 6237.7(14) | 4852.6(13) | 6935.4(11) | 56.8(4)  |
| Si1  | 8180.3(15) | 1086.3(15) | 6576.3(13) | 53.7(4)  |
| Si2  | 3076.1(15) | 8754.0(15) | 3266.1(14) | 53.4(4)  |
| O3   | 5370(4)    | 3876(4)    | 4151(3)    | 66.0(11) |
| O1   | 7195(5)    | 5052(4)    | 7791(4)    | 74.3(13) |
| N1   | 6965(6)    | 3618(5)    | 6467(4)    | 55.9(13) |
| O4   | 4077(4)    | 4755(4)    | 2227(4)    | 67.5(12) |
| O2   | 5884(5)    | 5876(4)    | 5877(4)    | 71.9(12) |
| C38  | 6681(6)    | 5343(5)    | 2332(5)    | 48.8(13) |
| N2   | 4330(5)    | 6147(4)    | 3581(4)    | 52.1(12) |
| C16  | 4584(6)    | 4461(5)    | 7695(5)    | 52.1(14) |
| C37  | 4060(7)    | 7392(6)    | 2681(5)    | 58.5(14) |

|     |          |           |         |          |
|-----|----------|-----------|---------|----------|
| C9  | 5494(6)  | -19(6)    | 6899(5) | 61.1(14) |
| C19 | 1977(7)  | 3791(7)   | 8865(6) | 70.2(17) |
| C23 | 1177(6)  | 8378(5)   | 3754(5) | 58.5(13) |
| C43 | 7871(7)  | 5415(7)   | 2973(5) | 64.9(16) |
| C42 | 9117(7)  | 5836(7)   | 2373(6) | 73.4(18) |
| C39 | 6745(8)  | 5676(7)   | 1085(6) | 68.7(17) |
| C4  | 11308(7) | 2907(7)   | 3478(7) | 80.1(18) |
| C8  | 6580(7)  | 574(6)    | 5955(5) | 65.2(15) |
| C17 | 4518(7)  | 4028(6)   | 8935(5) | 63.2(17) |
| C21 | 3336(7)  | 4559(7)   | 7045(5) | 69.9(18) |
| C10 | 5629(8)  | -1331(6)  | 7397(6) | 73.0(17) |
| C15 | 7479(6)  | 2404(6)   | 7331(5) | 57.3(14) |
| C31 | 4555(6)  | 10625(5)  | 1600(5) | 60.1(14) |
| C1  | 9435(6)  | 1774(6)   | 5337(5) | 60.5(14) |
| C41 | 9207(8)  | 6184(7)   | 1127(7) | 73.3(18) |
| C14 | 4340(6)  | 745(7)    | 7268(6) | 77.1(17) |
| C32 | 5092(7)  | 11506(5)  | 2110(6) | 72.4(16) |
| C33 | 6440(8)  | 11899(7)  | 1790(8) | 86(2)    |
| C40 | 8010(8)  | 6101(8)   | 515(6)  | 82(2)    |
| C6  | 9205(7)  | 1878(7)   | 4151(6) | 78.7(18) |
| C29 | 4059(7)  | 8989(7)   | 4542(6) | 79.4(19) |
| C18 | 3236(7)  | 3706(7)   | 9516(6) | 72.6(19) |
| C12 | 3469(10) | -1084(12) | 8616(8) | 106(3)   |
| C20 | 2062(7)  | 4237(7)   | 7620(6) | 77(2)    |
| C44 | 10574(9) | 6666(9)   | 475(8)  | 110(3)   |
| C11 | 4601(11) | -1870(8)  | 8251(7) | 98(3)    |
| C7  | 9138(7)  | -283(6)   | 7711(6) | 78.9(18) |
| C30 | 3066(6)  | 10207(5)  | 1943(6) | 66.9(15) |
| C26 | -1626(8) | 7798(7)   | 4540(8) | 85(2)    |
| C5  | 10101(9) | 2446(8)   | 3221(6) | 99(2)    |
| C27 | -1415(7) | 8614(7)   | 3442(7) | 87(2)    |
| C24 | 918(8)   | 7573(8)   | 4866(6) | 95(2)    |
| C28 | -27(6)   | 8904(6)   | 3043(6) | 70.8(16) |
| C34 | 7304(9)  | 11421(9)  | 1012(9) | 96(3)    |
| C22 | 561(8)   | 3398(9)   | 9494(8) | 109(3)   |
| C36 | 5466(8)  | 10148(7)  | 786(5)  | 79.3(18) |
| C25 | -468(9)  | 7265(8)   | 5250(8) | 94(2)    |
| C13 | 3348(8)  | 207(10)   | 8137(8) | 102(2)   |
| C35 | 6846(9)  | 10536(9)  | 493(6)  | 98(2)    |
| C2  | 10691(9) | 2243(9)   | 5550(7) | 107(3)   |

C3

11605(10)

2831(11)

4631(10)

122(3)

**Table 3 Anisotropic Displacement Parameters ( $\text{\AA}^2 \times 10^3$ ) for (S)-1p. The Anisotropic displacement factor exponent takes the form:  $-2\pi^2[h^2a^{*2}U_{11}+2hka^*b^*U_{12}+\dots]$ .**

| Atom | U <sub>11</sub> | U <sub>22</sub> | U <sub>33</sub> | U <sub>23</sub> | U <sub>13</sub> | U <sub>12</sub> |
|------|-----------------|-----------------|-----------------|-----------------|-----------------|-----------------|
| S2   | 59.1(8)         | 39.7(8)         | 60.7(8)         | -9.3(6)         | -1.1(7)         | -9.7(6)         |
| S1   | 64.2(9)         | 46.3(9)         | 60.7(8)         | -12.1(7)        | -3.1(7)         | -13.0(7)        |
| Si1  | 51.2(8)         | 51.0(10)        | 57.6(9)         | -11.5(8)        | -3.9(7)         | -5.7(7)         |
| Si2  | 46.1(8)         | 45.5(9)         | 66.8(10)        | -12.3(8)        | -7.4(7)         | -1.4(7)         |
| O3   | 80(3)           | 44(2)           | 68(2)           | -2(2)           | 1(2)            | -13(2)          |
| O1   | 75(3)           | 67(3)           | 89(3)           | -28(3)          | -10(2)          | -22(2)          |
| N1   | 67(3)           | 54(3)           | 46(3)           | -9(2)           | -4(2)           | -12(2)          |
| O4   | 69(2)           | 60(3)           | 79(3)           | -19(2)          | -11(2)          | -20(2)          |
| O2   | 93(3)           | 46(2)           | 69(3)           | 1(2)            | 0(2)            | -12(2)          |
| C38  | 50(3)           | 38(3)           | 59(3)           | -15(3)          | 1(3)            | -4(2)           |
| N2   | 56(3)           | 38(3)           | 58(3)           | -6(2)           | -1(2)           | -3(2)           |
| C16  | 64(4)           | 45(3)           | 47(3)           | -12(3)          | -4(3)           | -2(3)           |
| C37  | 60(3)           | 47(3)           | 64(3)           | -9(3)           | 5(3)            | -1(3)           |
| C9   | 65(3)           | 59(4)           | 64(3)           | -13(3)          | -11(3)          | -23(3)          |
| C19  | 69(4)           | 69(4)           | 66(4)           | -9(3)           | 4(3)            | -1(3)           |
| C23  | 62(3)           | 48(3)           | 67(3)           | -17(3)          | -3(3)           | -3(3)           |
| C43  | 65(4)           | 77(4)           | 55(3)           | -17(3)          | 2(3)            | -15(3)          |
| C42  | 62(4)           | 77(5)           | 83(5)           | -19(4)          | -3(3)           | -17(3)          |
| C39  | 80(4)           | 70(4)           | 56(3)           | -13(3)          | -5(3)           | -15(4)          |
| C4   | 69(4)           | 74(5)           | 98(5)           | -30(4)          | 31(4)           | -10(3)          |
| C8   | 76(4)           | 57(4)           | 65(3)           | -16(3)          | -8(3)           | -14(3)          |
| C17  | 59(4)           | 74(4)           | 50(3)           | -9(3)           | -13(3)          | 6(3)            |
| C21  | 70(4)           | 86(5)           | 49(3)           | -4(3)           | -12(3)          | -17(4)          |
| C10  | 91(4)           | 60(4)           | 72(4)           | -16(3)          | -8(3)           | -24(3)          |
| C15  | 57(3)           | 59(4)           | 54(3)           | -11(3)          | -5(2)           | -8(3)           |
| C31  | 68(3)           | 41(3)           | 64(3)           | 0(3)            | -16(3)          | -3(3)           |
| C1   | 63(3)           | 55(3)           | 64(4)           | -15(3)          | 1(3)            | -11(3)          |
| C41  | 64(4)           | 59(4)           | 93(5)           | -14(4)          | 9(4)            | -7(3)           |
| C14  | 59(3)           | 71(4)           | 100(5)          | -19(4)          | -11(3)          | -8(3)           |
| C32  | 74(4)           | 47(4)           | 96(4)           | -19(3)          | -3(3)           | -5(3)           |
| C33  | 77(5)           | 60(4)           | 108(5)          | 5(4)            | -20(4)          | -18(4)          |
| C40  | 91(5)           | 94(6)           | 55(4)           | -8(4)           | 11(4)           | -15(4)          |
| C6   | 75(4)           | 102(5)          | 71(4)           | -33(4)          | 16(3)           | -33(4)          |



|     |        |        |        |        |        |        |
|-----|--------|--------|--------|--------|--------|--------|
| C29 | 80(4)  | 79(5)  | 86(4)  | -30(4) | -22(4) | -9(4)  |
| C18 | 77(4)  | 81(5)  | 50(3)  | -8(3)  | 1(3)   | 5(4)   |
| C12 | 88(6)  | 141(9) | 99(6)  | -22(6) | 8(5)   | -68(6) |
| C20 | 68(4)  | 100(6) | 60(4)  | -11(4) | -14(3) | -11(4) |
| C44 | 87(5)  | 111(7) | 122(6) | -15(5) | 42(5)  | -29(5) |
| C11 | 128(7) | 76(5)  | 85(5)  | 7(4)   | -23(5) | -49(5) |
| C7  | 73(4)  | 71(4)  | 82(4)  | -9(3)  | -12(3) | 12(3)  |
| C30 | 58(3)  | 50(3)  | 88(4)  | -12(3) | -6(3)  | 0(3)   |
| C26 | 67(4)  | 59(4)  | 129(6) | -23(4) | 22(4)  | -13(3) |
| C5  | 102(5) | 129(7) | 72(4)  | -34(4) | 19(4)  | -30(5) |
| C27 | 63(4)  | 66(4)  | 126(6) | -13(4) | -7(4)  | -10(3) |
| C24 | 80(5)  | 109(6) | 76(5)  | 2(4)   | 10(4)  | 1(4)   |
| C28 | 55(3)  | 60(4)  | 91(4)  | -4(3)  | -10(3) | -10(3) |
| C34 | 68(4)  | 94(6)  | 104(6) | 19(5)  | 5(4)   | -25(4) |
| C22 | 75(4)  | 130(8) | 107(6) | -2(6)  | 10(5)  | -26(5) |
| C36 | 100(5) | 77(5)  | 57(3)  | -10(3) | -5(3)  | -13(4) |
| C25 | 82(5)  | 95(6)  | 91(5)  | -8(4)  | 33(4)  | -9(4)  |
| C13 | 68(4)  | 129(8) | 115(6) | -36(6) | 19(4)  | -29(5) |
| C35 | 98(5)  | 117(7) | 65(4)  | 0(4)   | 18(4)  | -15(5) |
| C2  | 90(5)  | 156(8) | 80(5)  | -13(5) | -1(4)  | -69(5) |
| C3  | 85(5)  | 157(9) | 130(8) | -28(7) | 11(6)  | -63(6) |

**Table 4 Bond Lengths for (S)-1p.**

| Atom | Atom | Length/Å | Atom | Atom | Length/Å  |
|------|------|----------|------|------|-----------|
| S2   | O3   | 1.436(4) | C23  | C28  | 1.381(7)  |
| S2   | O4   | 1.427(4) | C43  | C42  | 1.375(8)  |
| S2   | C38  | 1.759(6) | C42  | C41  | 1.382(10) |
| S2   | N2   | 1.620(5) | C39  | C40  | 1.378(9)  |
| S1   | O1   | 1.428(4) | C4   | C5   | 1.351(10) |
| S1   | N1   | 1.618(5) | C4   | C3   | 1.344(12) |
| S1   | O2   | 1.429(4) | C17  | C18  | 1.367(9)  |
| S1   | C16  | 1.761(6) | C21  | C20  | 1.357(9)  |
| Si1  | C8   | 1.875(6) | C10  | C11  | 1.395(10) |
| Si1  | C15  | 1.881(6) | C31  | C32  | 1.391(8)  |
| Si1  | C1   | 1.848(6) | C31  | C30  | 1.501(8)  |
| Si1  | C7   | 1.851(6) | C31  | C36  | 1.380(8)  |
| Si2  | C37  | 1.882(6) | C1   | C6   | 1.363(8)  |
| Si2  | C23  | 1.873(6) | C1   | C2   | 1.379(8)  |

|     |     |           |     |     |           |
|-----|-----|-----------|-----|-----|-----------|
| Si2 | C29 | 1.850(6)  | C41 | C40 | 1.362(9)  |
| Si2 | C30 | 1.873(6)  | C41 | C44 | 1.512(9)  |
| N1  | C15 | 1.458(7)  | C14 | C13 | 1.382(10) |
| C38 | C43 | 1.374(8)  | C32 | C33 | 1.367(9)  |
| C38 | C39 | 1.382(8)  | C33 | C34 | 1.327(11) |
| N2  | C37 | 1.464(6)  | C6  | C5  | 1.377(9)  |
| C16 | C17 | 1.378(8)  | C12 | C11 | 1.376(12) |
| C16 | C21 | 1.381(8)  | C12 | C13 | 1.348(12) |
| C9  | C8  | 1.510(8)  | C26 | C27 | 1.356(10) |
| C9  | C10 | 1.371(8)  | C26 | C25 | 1.349(10) |
| C9  | C14 | 1.378(8)  | C27 | C28 | 1.384(8)  |
| C19 | C18 | 1.392(9)  | C24 | C25 | 1.383(10) |
| C19 | C20 | 1.386(9)  | C34 | C35 | 1.368(12) |
| C19 | C22 | 1.514(10) | C36 | C35 | 1.388(10) |
| C23 | C24 | 1.372(9)  | C2  | C3  | 1.387(12) |

**Table 5 Bond Angles for (S)-1p.**

| Atom | Atom | Atom | Angle/°  | Atom | Atom | Atom | Angle/°  |
|------|------|------|----------|------|------|------|----------|
| O3   | S2   | C38  | 109.4(3) | C28  | C23  | Si2  | 122.7(4) |
| O3   | S2   | N2   | 105.8(2) | C38  | C43  | C42  | 120.0(6) |
| O4   | S2   | O3   | 119.0(3) | C43  | C42  | C41  | 121.3(6) |
| O4   | S2   | C38  | 107.5(3) | C40  | C39  | C38  | 118.4(6) |
| O4   | S2   | N2   | 107.8(3) | C3   | C4   | C5   | 119.9(7) |
| N2   | S2   | C38  | 106.7(3) | C9   | C8   | Si1  | 114.4(4) |
| O1   | S1   | N1   | 108.2(3) | C18  | C17  | C16  | 120.6(6) |
| O1   | S1   | O2   | 118.8(3) | C20  | C21  | C16  | 120.4(6) |
| O1   | S1   | C16  | 107.8(3) | C9   | C10  | C11  | 120.0(7) |
| N1   | S1   | C16  | 107.9(3) | N1   | C15  | Si1  | 112.5(4) |
| O2   | S1   | N1   | 106.2(3) | C32  | C31  | C30  | 121.0(6) |
| O2   | S1   | C16  | 107.6(3) | C36  | C31  | C32  | 116.6(6) |
| C8   | Si1  | C15  | 108.3(3) | C36  | C31  | C30  | 122.3(6) |
| C1   | Si1  | C8   | 110.1(3) | C6   | C1   | Si1  | 123.8(5) |
| C1   | Si1  | C15  | 107.4(3) | C6   | C1   | C2   | 114.4(6) |
| C1   | Si1  | C7   | 111.4(3) | C2   | C1   | Si1  | 121.8(5) |
| C7   | Si1  | C8   | 111.0(3) | C42  | C41  | C44  | 120.9(7) |
| C7   | Si1  | C15  | 108.5(3) | C40  | C41  | C42  | 117.5(7) |
| C23  | Si2  | C37  | 108.9(3) | C40  | C41  | C44  | 121.7(7) |
| C23  | Si2  | C30  | 111.7(2) | C9   | C14  | C13  | 120.9(7) |

|     |     |     |          |     |     |     |          |
|-----|-----|-----|----------|-----|-----|-----|----------|
| C29 | Si2 | C37 | 111.0(3) | C33 | C32 | C31 | 121.2(7) |
| C29 | Si2 | C23 | 110.2(3) | C34 | C33 | C32 | 121.2(8) |
| C29 | Si2 | C30 | 110.7(3) | C41 | C40 | C39 | 122.9(6) |
| C30 | Si2 | C37 | 104.1(3) | C1  | C6  | C5  | 123.9(6) |
| C15 | N1  | S1  | 120.3(4) | C17 | C18 | C19 | 120.6(6) |
| C43 | C38 | S2  | 120.0(4) | C13 | C12 | C11 | 119.8(8) |
| C43 | C38 | C39 | 119.9(6) | C21 | C20 | C19 | 121.3(6) |
| C39 | C38 | S2  | 120.0(5) | C12 | C11 | C10 | 120.1(8) |
| C37 | N2  | S2  | 116.8(3) | C31 | C30 | Si2 | 113.5(3) |
| C17 | C16 | S1  | 120.9(5) | C25 | C26 | C27 | 119.5(7) |
| C17 | C16 | C21 | 119.1(6) | C4  | C5  | C6  | 119.3(7) |
| C21 | C16 | S1  | 120.0(5) | C26 | C27 | C28 | 120.7(6) |
| N2  | C37 | Si2 | 115.2(4) | C23 | C24 | C25 | 122.2(7) |
| C10 | C9  | C8  | 120.5(6) | C23 | C28 | C27 | 121.0(6) |
| C10 | C9  | C14 | 118.7(6) | C33 | C34 | C35 | 120.3(8) |
| C14 | C9  | C8  | 120.7(5) | C31 | C36 | C35 | 121.4(7) |
| C18 | C19 | C22 | 121.2(6) | C26 | C25 | C24 | 120.0(7) |
| C20 | C19 | C18 | 117.9(7) | C12 | C13 | C14 | 120.4(8) |
| C20 | C19 | C22 | 120.9(6) | C34 | C35 | C36 | 119.3(7) |
| C24 | C23 | Si2 | 120.7(5) | C1  | C2  | C3  | 122.8(8) |
| C24 | C23 | C28 | 116.6(6) | C4  | C3  | C2  | 119.6(8) |

**Table 6 Torsion Angles for (*S*)-1p.**

| A   | B   | C   | D   | Angle/°   | A   | B   | C   | D   | Angle/°   |
|-----|-----|-----|-----|-----------|-----|-----|-----|-----|-----------|
| S2  | C38 | C43 | C42 | -175.4(5) | C17 | C16 | C21 | C20 | 0.2(11)   |
| S2  | C38 | C39 | C40 | 175.0(5)  | C21 | C16 | C17 | C18 | -0.3(10)  |
| S2  | N2  | C37 | Si2 | 174.6(3)  | C10 | C9  | C8  | Si1 | -91.3(6)  |
| S1  | N1  | C15 | Si1 | 176.7(3)  | C10 | C9  | C14 | C13 | 1.0(9)    |
| S1  | C16 | C17 | C18 | -178.9(5) | C15 | Si1 | C8  | C9  | -63.5(5)  |
| S1  | C16 | C21 | C20 | 178.8(5)  | C15 | Si1 | C1  | C6  | -118.0(6) |
| Si1 | C1  | C6  | C5  | 176.8(6)  | C15 | Si1 | C1  | C2  | 61.3(6)   |
| Si1 | C1  | C2  | C3  | -176.2(8) | C31 | C32 | C33 | C34 | -2.4(10)  |
| Si2 | C23 | C24 | C25 | -179.4(6) | C31 | C36 | C35 | C34 | -0.7(10)  |
| Si2 | C23 | C28 | C27 | -179.2(5) | C1  | Si1 | C8  | C9  | 179.3(4)  |
| O3  | S2  | C38 | C43 | -42.1(5)  | C1  | Si1 | C15 | N1  | 48.1(5)   |
| O3  | S2  | C38 | C39 | 141.7(5)  | C1  | C6  | C5  | C4  | 1.7(12)   |
| O3  | S2  | N2  | C37 | 172.6(4)  | C1  | C2  | C3  | C4  | -3.0(16)  |
| O1  | S1  | N1  | C15 | 50.4(5)   | C14 | C9  | C8  | Si1 | 89.3(6)   |

|     |            |           |                 |                 |          |
|-----|------------|-----------|-----------------|-----------------|----------|
| O1  | S1         | C16C17    | -18.9(6)        | C14 C9 C10C11   | 0.6(8)   |
| O1  | S1         | C16C21    | 162.6(5)        | C32C31 C30 Si2  | -89.4(5) |
| N1  | S1         | C16C17    | 97.7(5)         | C32C31 C36C35   | -0.2(8)  |
| N1  | S1         | C16C21    | -80.8(6)        | C32C33 C34C35   | 1.3(11)  |
| O4  | S2         | C38C43    | -172.6(5)       | C33C34 C35C36   | 0.2(11)  |
| O4  | S2         | C38C39    | 11.2(6)         | C6 C1 C2 C3     | 3.1(13)  |
| O4  | S2         | N2 C37    | -59.1(4)        | C29 Si2 C37 N2  | 55.8(5)  |
| O2  | S1         | N1 C15    | 178.9(4)        | C29 Si2 C23 C24 | -40.2(6) |
| O2  | S1         | C16C17    | -148.1(5)       | C29 Si2 C23 C28 | 138.4(5) |
| O2  | S1         | C16C21    | 33.3(6)         | C29 Si2 C30C31  | 50.9(5)  |
| C38 | S2         | N2 C37    | 56.2(5)         | C18C19 C20C21   | 1.1(12)  |
| C38 | C43C42C41  | -0.4(11)  | C20C19 C18C17   | -1.3(11)        |          |
| C38 | C39C40C41  | 1.2(12)   | C44C41 C40C39   | -179.4(8)       |          |
| N2  | S2         | C38C43    | 72.0(5)         | C11C12 C13C14   | 1.1(12)  |
| N2  | S2         | C38C39    | -104.3(5)       | C7 Si1 C8 C9    | 55.5(5)  |
| C16 | S1         | N1 C15    | -66.0(5)        | C7 Si1 C15 N1   | 168.6(4) |
| C16 | C17C18C19  | 0.9(11)   | C7 Si1 C1 C6    | 123.3(6)        |          |
| C16 | C21C20C19  | -0.6(11)  | C7 Si1 C1 C2    | -57.4(7)        |          |
| C37 | Si2 C23C24 | 81.8(6)   | C30 Si2 C37 N2  | 175.0(4)        |          |
| C37 | Si2 C23C28 | -99.5(5)  | C30 Si2 C23 C24 | -163.7(5)       |          |
| C37 | Si2 C30C31 | -68.5(5)  | C30 Si2 C23 C28 | 15.0(6)         |          |
| C9  | C10C11C12  | -1.5(10)  | C30C31 C32C33   | -179.3(5)       |          |
| C9  | C14C13C12  | -1.9(11)  | C30C31 C36C35   | -179.2(5)       |          |
| C23 | Si2 C37 N2 | -65.7(5)  | C26C27 C28C23   | -0.5(10)        |          |
| C23 | Si2 C30C31 | 174.1(4)  | C5 C4 C3 C2     | 2.0(15)         |          |
| C23 | C24C25C26  | -2.3(13)  | C27C26 C25C24   | 1.3(12)         |          |
| C43 | C38C39C40  | -1.2(10)  | C24C23 C28C27   | -0.5(9)         |          |
| C43 | C42C41C40  | 0.4(11)   | C28C23 C24C25   | 1.9(11)         |          |
| C43 | C42C41C44  | 179.0(7)  | C22C19 C18C17   | 178.1(7)        |          |
| C42 | C41C40C39  | -0.8(12)  | C22C19 C20C21   | -178.3(7)       |          |
| C39 | C38C43C42  | 0.8(10)   | C36C31 C32C33   | 1.8(8)          |          |
| C8  | Si1 C15 N1 | -70.8(4)  | C36C31 C30 Si2  | 89.5(6)         |          |
| C8  | Si1 C1 C6  | -0.2(7)   | C25C26 C27C28   | 0.1(11)         |          |
| C8  | Si1 C1 C2  | 179.1(6)  | C13C12 C11C10   | 0.6(12)         |          |
| C8  | C9 C10C11  | -178.7(5) | C2 C1 C6 C5     | -2.5(11)        |          |
| C8  | C9 C14C13  | -179.6(6) | C3 C4 C5 C6     | -1.4(12)        |          |

**Table 7 Hydrogen Atom Coordinates ( $\text{\AA}\times 10^4$ ) and Isotropic Displacement Parameters ( $\text{\AA}^2\times 10^3$ ) for (S)-1p.**

| Atom | <i>x</i> | <i>y</i> | <i>z</i> | U(eq) |
|------|----------|----------|----------|-------|
| H37A | 3490.91  | 7275.69  | 2038.64  | 70    |
| H37B | 4992.68  | 7642.98  | 2332.35  | 70    |
| H43  | 7833.83  | 5180.37  | 3812.23  | 78    |
| H42  | 9915.37  | 5888.18  | 2814.4   | 88    |
| H39  | 5953.8   | 5616.21  | 640.42   | 82    |
| H4   | 11932.78 | 3276.66  | 2858.98  | 96    |
| H8A  | 6076.96  | 1323.14  | 5395.98  | 78    |
| H8B  | 6942.81  | -49.82   | 5502.07  | 78    |
| H17  | 5354.2   | 3955     | 9379.99  | 76    |
| H21  | 3368.65  | 4847.97  | 6207.42  | 84    |
| H10  | 6405.31  | -1861.85 | 7165.94  | 88    |
| H15A | 6682.16  | 2123.85  | 7881.58  | 69    |
| H15B | 8254.9   | 2549.95  | 7800.76  | 69    |
| H14  | 4227.36  | 1634.43  | 6927.38  | 92    |
| H32  | 4523.32  | 11832.62 | 2680.11  | 87    |
| H33  | 6757.95  | 12513.29 | 2122.83  | 103   |
| H40  | 8048.31  | 6341.14  | -323.72  | 99    |
| H6   | 8394.54  | 1545.25  | 3957.29  | 94    |
| H29A | 4120.45  | 8210.03  | 5186.78  | 119   |
| H29B | 3538.69  | 9689.88  | 4822.15  | 119   |
| H29C | 5026.46  | 9188.81  | 4280.22  | 119   |
| H18  | 3203.83  | 3426.51  | 10353.69 | 87    |
| H12  | 2790.07  | -1443.26 | 9190.92  | 128   |
| H20  | 1229.98  | 4315.93  | 7168.67  | 93    |
| H44A | 10597.54 | 7549.78  | 488.13   | 164   |
| H44B | 10570.48 | 6611.32  | -345.51  | 164   |
| H44C | 11420.42 | 6141.6   | 870.12   | 164   |
| H11  | 4680.74  | -2762.18 | 8574.73  | 117   |
| H7A  | 8441.13  | -678.88  | 8294.55  | 118   |
| H7B  | 9848.46  | 30.9     | 8109.16  | 118   |
| H7C  | 9621.35  | -909.69  | 7317.09  | 118   |
| H30A | 2664.12  | 10011.97 | 1255.96  | 80    |
| H30B | 2428.12  | 10919.8  | 2131.35  | 80    |
| H26  | -2562.74 | 7607.1   | 4801.69  | 102   |
| H5   | 9878.59  | 2512.36  | 2424.93  | 119   |
| H27  | -2212.84 | 8983.82  | 2952.07  | 104   |
| H24  | 1699.65  | 7221.94  | 5378.01  | 114   |
| H28  | 97.11    | 9460.42  | 2285.03  | 85    |
| H34  | 8225.27  | 11688.33 | 818.63   | 116   |

|      |          |          |          |        |
|------|----------|----------|----------|--------|
| H22A | 659.96   | 3238.43  | 10350.68 | 163    |
| H22B | 343.69   | 2625.36  | 9307.69  | 163    |
| H22C | -218.28  | 4082.21  | 9223.23  | 163    |
| H36  | 5149.35  | 9554.13  | 426.38   | 95     |
| H25  | -600.88  | 6690.6   | 5997.32  | 112    |
| H13  | 2592.45  | 739.44   | 8393.46  | 123    |
| H35  | 7452.18  | 10198.58 | -50.25   | 118    |
| H2A  | 10935.21 | 2160.79  | 6344.48  | 128    |
| H3   | 12417.5  | 3170.73  | 4810.32  | 146    |
| H1   | 6510(50) | 3560(50) | 5920(40) | 43(15) |
| H2   | 4770(60) | 6230(60) | 4210(50) | 62(18) |

## 9. Bioactivity Evaluation

### *((3*r*,5*r*,7*r*)-adamantan-1-yl)(3,3-dimethylindolin-1-yl)methanone (18)*

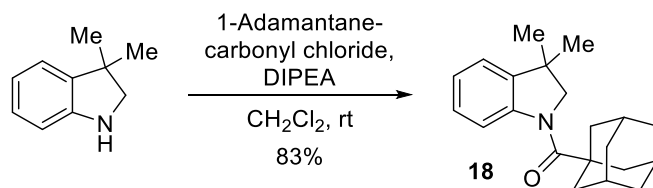

Compound **18** was prepared according to the literature<sup>21</sup>. To a solution of 3,3-dimethylindoline (100 mg, 0.60 mmol) in CH<sub>2</sub>Cl<sub>2</sub> (3 mL) was added 1-adamantanecarbonyl chloride (202 mg, 0.90 mmol, 1.5 equiv.) and DIPEA (263 mg, 1.79 mmol, 3.0 equiv.) under argon atmosphere. The reaction was stirred at room temperature for 2 h before quenching with sat. aq. NaHCO<sub>3</sub> and extracting with CH<sub>2</sub>Cl<sub>2</sub> (3 × 10 mL). The combined organic layers were washed with sat. aq. NaCl, dried over Na<sub>2</sub>SO<sub>4</sub> and concentrated under reduced pressure. The crude residue was purified by silica gel flash column chromatography (eluent: EtOAc/petroleum ether = 1/20) to give **18** as a white solid (175 mg, 83%).

- R<sub>f</sub> = 0.7 (EtOAc/ petroleum ether = 1/10).
- mp : 134.8 – 136.5 °C.
- <sup>1</sup>H NMR (400 MHz, CDCl<sub>3</sub>) δ 8.20 (s, 1H), 7.25 – 6.92 (m, 3H), 4.03 (s, 2H), 2.10 (s, 9H), 1.77 (s, 6H), 1.33 (s, 6H).
- <sup>13</sup>C NMR (100 MHz, CDCl<sub>3</sub>) δ 176.0, 143.6, 139.9, 127.4, 123.8, 121.3, 118.6, 63.8, 42.9, 41.0, 38.2, 36.6, 28.4, 27.1.
- IR (neat) cm<sup>-1</sup> 3006, 2903, 2989, 2849, 1639, 1597, 1452, 1275, 1260, 764, 751.
- HRMS calcd for C<sub>21</sub>H<sub>28</sub>NO (M+H)<sup>+</sup>: 310.2165, found 310.2163.

### HPLC analysis

Analytical HPLC was performed with an Agilent 1100 Series pump system equipped with a reversed-phase ODS column (Welch ultimate XB-C<sub>18</sub> column (4.6 mm × 150 mm, 5 μm) ) with a flow rate of 1.0 mL/min using a gradient of MeOH and water (0.1% TFA) and UV detection at 254 nm. Mobile phase system for purity determination by area normalization method was (0~3.0 min, 5% B; 3.0~4.0 min, 5%~90% B; 4.0~12.0 min, 90% B; 12.0~13.0 min, 90%~5% B; 13.0~15.0 min, 5% B). The column temperature was 30 °C, and the sample size was 5 μL. All compounds were tested parallelly in three groups.

### Cell-based cAMP assay

Determination of cAMP levels in CHO cells stably expressing human CB<sub>1</sub>R and CB<sub>2</sub>R was performed using the Lance-Ultra cAMP kit (Perkin Elmer, TRF0263). Cells were washed and re-suspended in 1 × stimulation buffer and dispensed in white 384-well microplates at a density of 3000 cells per well and incubated for 15 min at rt with compounds, followed by 15 min incubation with forskolin, and 1h more with homogeneous time-resolved fluorescence (HTRF) assay reagents. Fluorescence at 665 nm and 615 nm was analyzed on a BioTek Synergy HT. Forskolin-stimulated cAMP levels were normalized to 100%.

21. M. Nettekoven, J. Fingerle, U. Grether, S. Gruner, A. Kimbara, B. Pullmann, M. Rogers-Evans, S. Rover, F. Schuler, T. Schulz-Gasch, C. Ullmer, *Bioorg. Med. Chem. Lett.* **2013**, *23*, 1177.

### **n-Octanol-water partition coefficient determination by the shake flask method**

Experimental log D values were determined using a shake-flask method combined RP-HPLC. Tri-distilled water (pH 7.4) served as aqueous phase of the system. The pH values of the aqueous phase for the shake-flask method were measured with a pH-Meter with an accuracy of  $\pm 0.002$ . As a non-polar phase, n-octanol was used. Equal volume of n-octanol and tri-distilled water are shaken at 37 °C for 24 hours to make them mutually saturated. After standing overnight, the two phases are separated after stratification. For each compound, a 20 mg/mL solution was prepared in a water-saturated n-octanol. The solution was mixed in 1.0 mL n-octanol-saturated pH 7.4 water aliquotly. The mixed solution was heavily shaken at 37 °C for 24 h. After 24 h, the two phases were separated with resting overnight to ensure complete separation of the two phases. Each phase was transferred to a 1.5 mL microcentrifuge tube and centrifugated at 20000 rpm for 10 min. 100  $\mu$ L of both phases was transferred to disposable injection bottles and injected into an HPLC chromatograph. The relative peak areas of the samples in each phase were then determined by HPLC analysis. The Log D value was obtained from the ratio of peak areas in the octanol and buffer phases, respectively.  $\text{Log D} = \log (C_{\text{octanol}}/C_{\text{water}})$

HPLC conditions. Analytical HPLC was performed with a Shimadzu pump system equipped with a reversed-phase ODS column (SWELL C18 column (4.6 mm $\times$ 150 mm, 5  $\mu$ m) with a flow rate of 1.0 mL/min using a gradient of ACN and water (0.1% TFA) and UV detection at 254 nm. The column temperature was 30 °C, and the sample size was 10  $\mu$ L. The mobile phase consisted of an ACN/0.1% aqueous trifluoroacetic acid (pH 2.0) mixture. The ratio of the two solvents in the mixture was (0~2.0 min, 20%~30% B; 2.0~18.0 min, 30%~80% B; 18.0~20.0 min, 80% B; 20.0~25.0 min, 80%~20% B; 25.0~30.0 min, 20% B).

### **Animals**

ICR mice were used in all animal studies. Equally sized cohorts of male and female mice aged 8 to 26 weeks were used. Animals were housed in a conventional facility at 21 °C on a 12 h light-dark cycle with unrestricted access to food and water.

**Ethical Statement:** All animal experiments were performed in compliance with the Guide for the Care and Use of Laboratory Animals (Ministry of Science and Technology of China, 2013, IACUC-2013-012) and approved by Animal Ethics Committee of West China Hospital (Approval No. 2019222A).

### **Determination of plasma - brain distribution in mice**

The mice were randomly divided into two groups. Animals were fasted for 12 h. Each animal was administered once (**18** at 300 mg/kg and **10** at isomole), and blood was collected 40 min after administration. The mice were deeply anesthetized with isoflurane (2%) . And the head was cut off and the chest cavity was opened for cardiac blood extraction. After the blood was taken, the brain tissue of the mouse was taken out immediately. After that, 500  $\mu$ l normal saline was added, and the brain homogenate was made by grinding with a high-throughput tissue fragmentation machine. The plasma and brain homogenates were centrifuged at 3500 rpm for 10 min for separation, and 100  $\mu$ L of supernatant was taken. Three times the volume of acetonitrile were added to completely precipitate protein, and the protein was shaken by vortex, then the homogenates were oscillated with ultrasonic



wave for 3-5 min, and centrifuged at 20,000 rpm for 10 min. Appropriate amount of supernatant was taken for HPLC analysis.

### **CFA model**

A volume of 20 µl Complete Freund's Adjuvant (CFA) (Sigma-Aldrich, F5881) or normal saline was injected into the left hindpaw. One day after CFA model setting up, the CFA mice were individually placed in the chamber as described in the spontaneous pain test. Before inflammatory pain experiment, mice were randomly divided into the following groups: model group, **18**- 0.7 mmol/kg group, **18**- 1.0 mmol/kg group, **18**- 1.3 mmol/kg group and **10**- 0.7 mmol/kg group, **10**- 1.0 mmol/kg group, **10**- 1.3 mmol/kg group. Mechanical responses were tested by stimulating the region comprising the sural nerve territory with electronic von Frey (IITC, #2391).

### **Statistical analysis**

Statistical analyses were carried out using Origin 9.0 software (Origin Lab Corporation). Differences in measured variables were assessed by using one-way or two-way analysis of variance (ANOVA) followed by Dunnett's T3 or Tukey-Kramer HSD post hoc corrections for multiple comparison testing. The normality of the data distribution was determined using the Shapiro-Wilk test before appropriate statistical methods were chosen. \* P < 0.05, \*\* P < 0.01 and \*\*\*P < 0.001, vehicle versus **10** 1.3 mmol/kg. &P < 0.05 and &&&P < 0.001, vehicle versus **10** 1.0 mmol/kg. #P < 0.05, vehicle versus **18** 1.3 mmol/kg and **18** 1.0 mmol/kg. ##P < 0.01, vehicle versus **18** 1.3 mmol/kg. ###P < 0.001, **18** 1.3 mmol/kg and **10** 1.3 mmol/kg.

**Table 1. n-Octanol-water partition coefficient determination**

| Compound  | Peak area |          |          |       |      |      | Log D |
|-----------|-----------|----------|----------|-------|------|------|-------|
|           | n-Octanol |          |          | Water |      |      |       |
| <b>18</b> | 21478303  | 23437093 | 29286989 | 4316  | 2712 | 6631 | 4.75  |
| <b>10</b> | 19337076  | 25293145 | 27327905 | 275   | 333  | 454  | 5.84  |

**Table 2. Determination of plasma - brain distribution of 18 and 10 in mice**

| Compound  | Peak area* |       |         |       |         |       |
|-----------|------------|-------|---------|-------|---------|-------|
|           | Group 1    |       | Group 2 |       | Group 3 |       |
|           | Plasma     | Brain | Plasma  | Brain | Plasma  | Brain |
| <b>18</b> | 30.3       | 27    | 28.5    | 24.4  | 37.8    | 34.6  |
| <b>10</b> | 3.8        | 19.3  | 5.3     | 30.3  | 9       | 22.1  |

\*: Samples were collected 40 min after administration with 300mg/kg

**Figure 1. CB<sub>1</sub>R and CB<sub>2</sub>R Agonistic Activity of Compound 18 and 10**

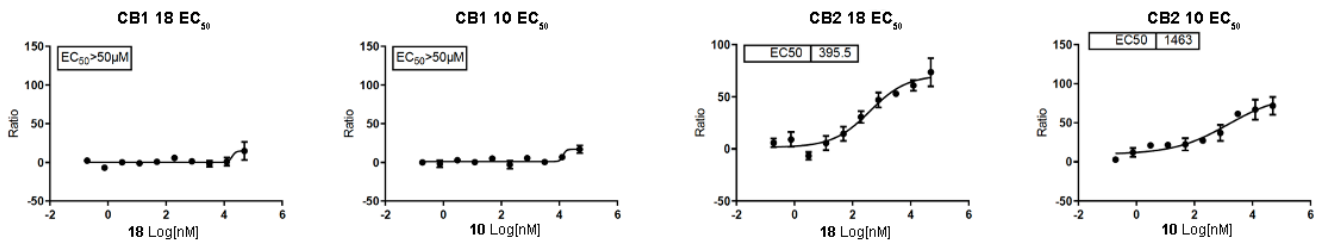

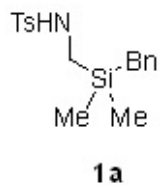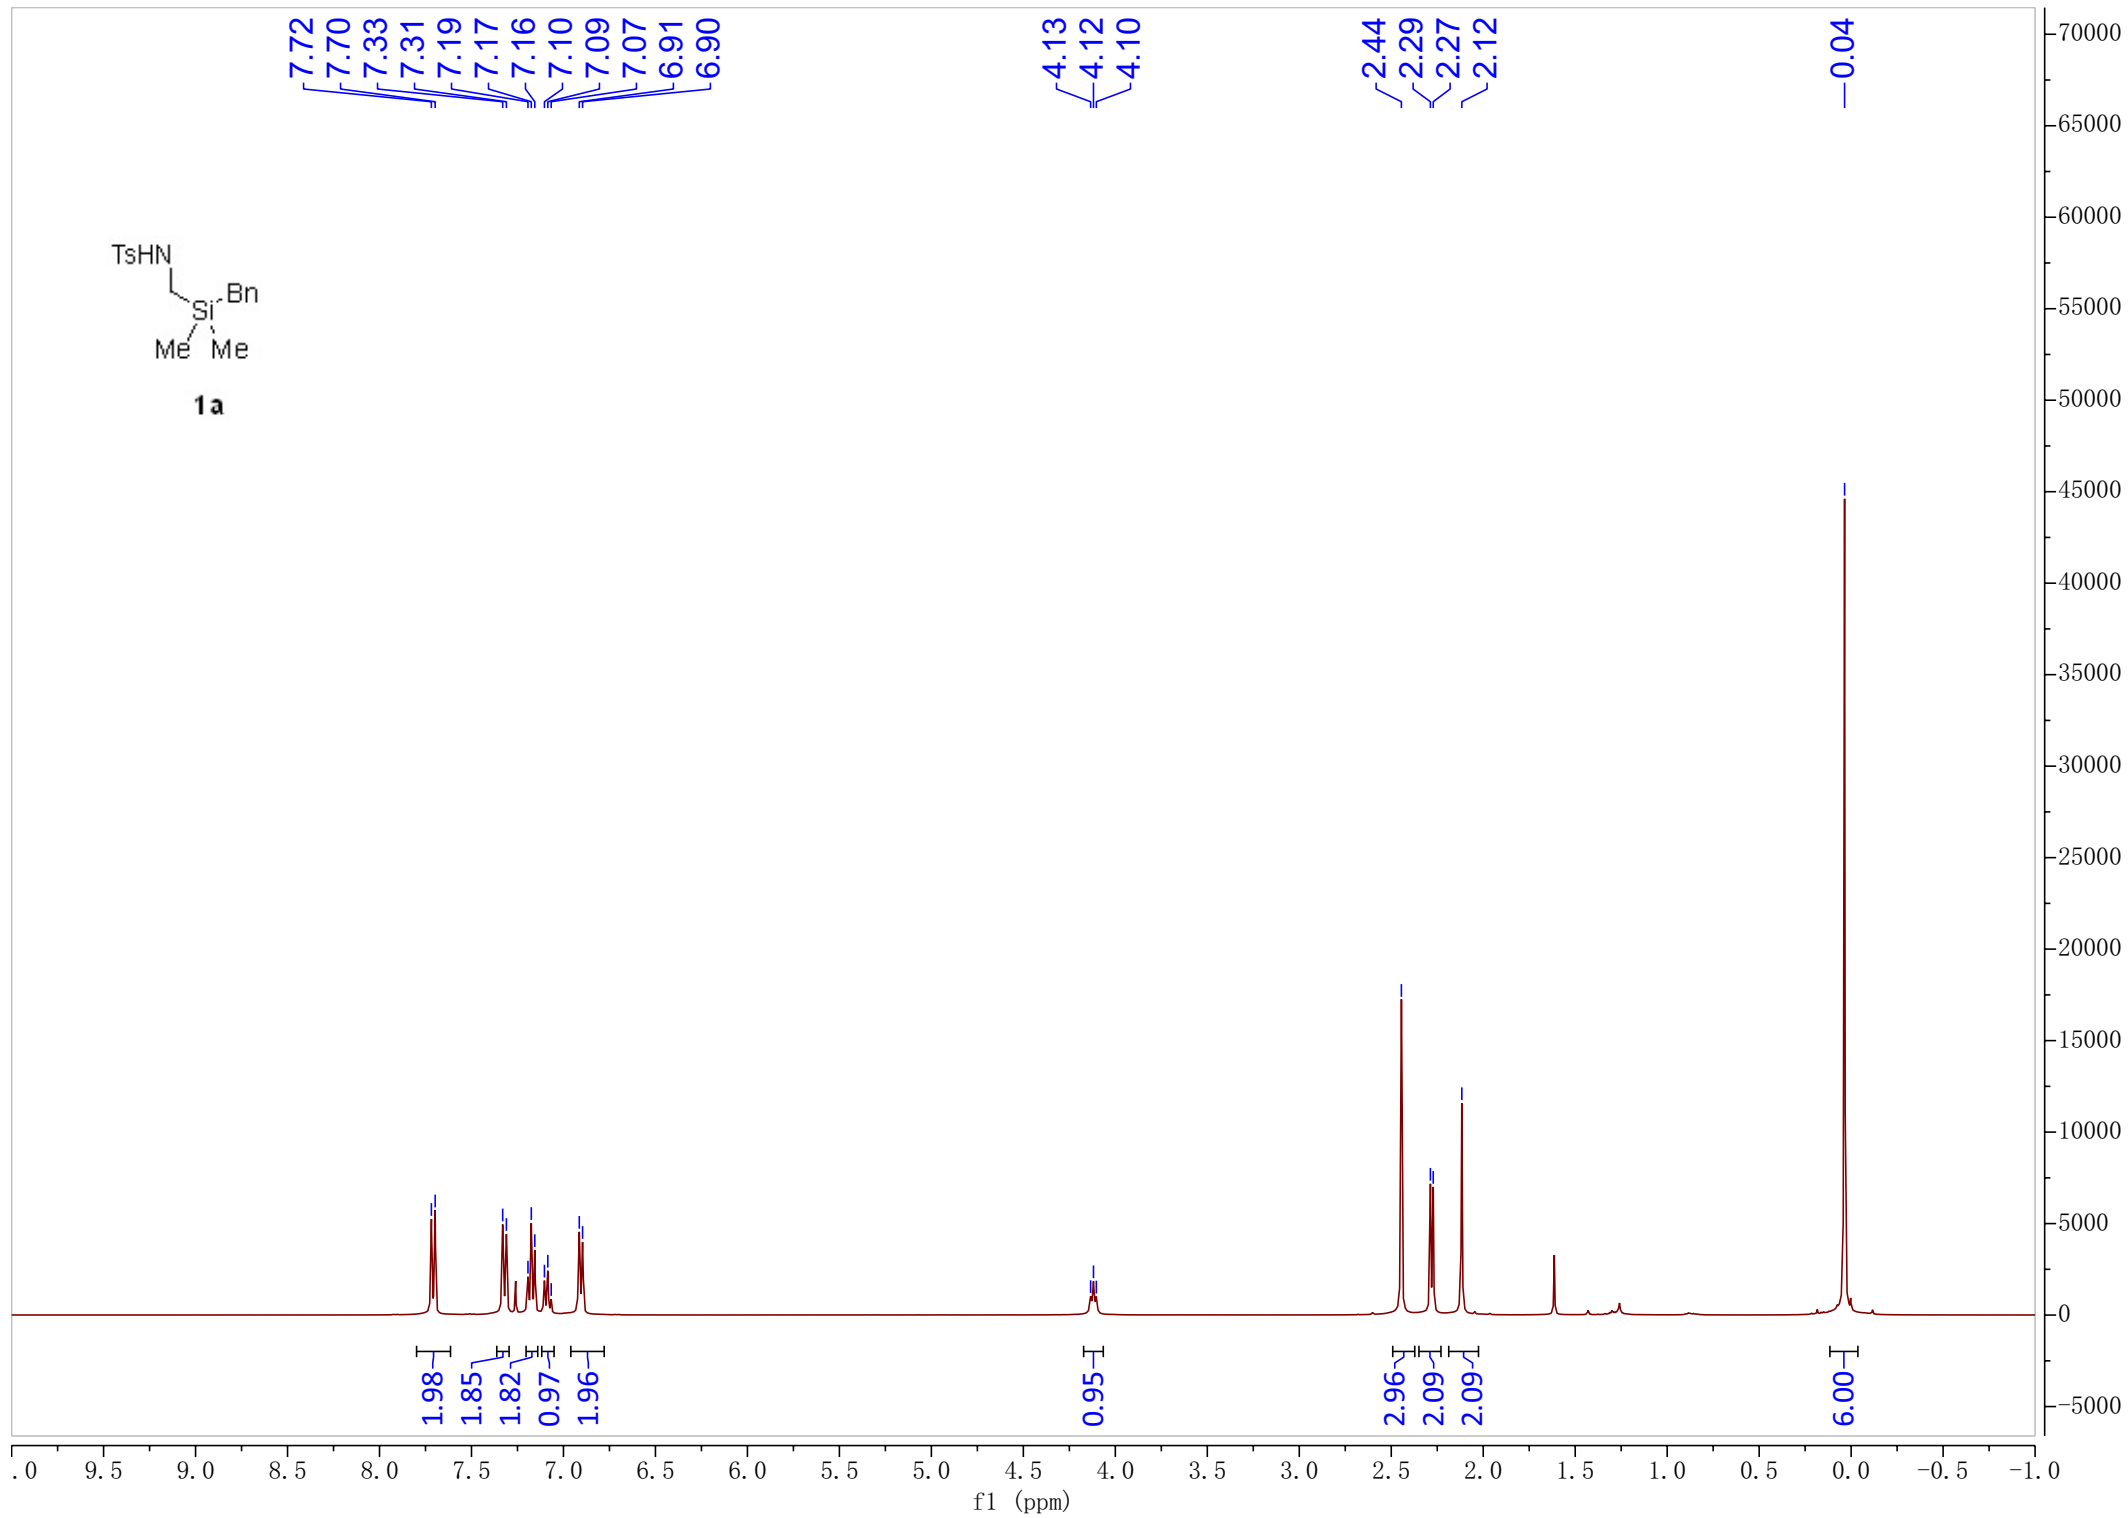

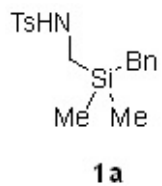

143.37  
138.59  
135.25  
129.59  
128.57  
127.86  
127.52  
124.59

~30.81  
~24.04  
~21.53

--4.70

190 180 170 160 150 140 130 120 110 100 90 80 70 60 50 40 30 20 10 0 -10

f1 (ppm)

S76

3400  
3200  
3000  
2800  
2600  
2400  
2200  
2000  
1800  
1600  
1400  
1200  
1000  
800  
600  
400  
200  
0  
-200



-1.94

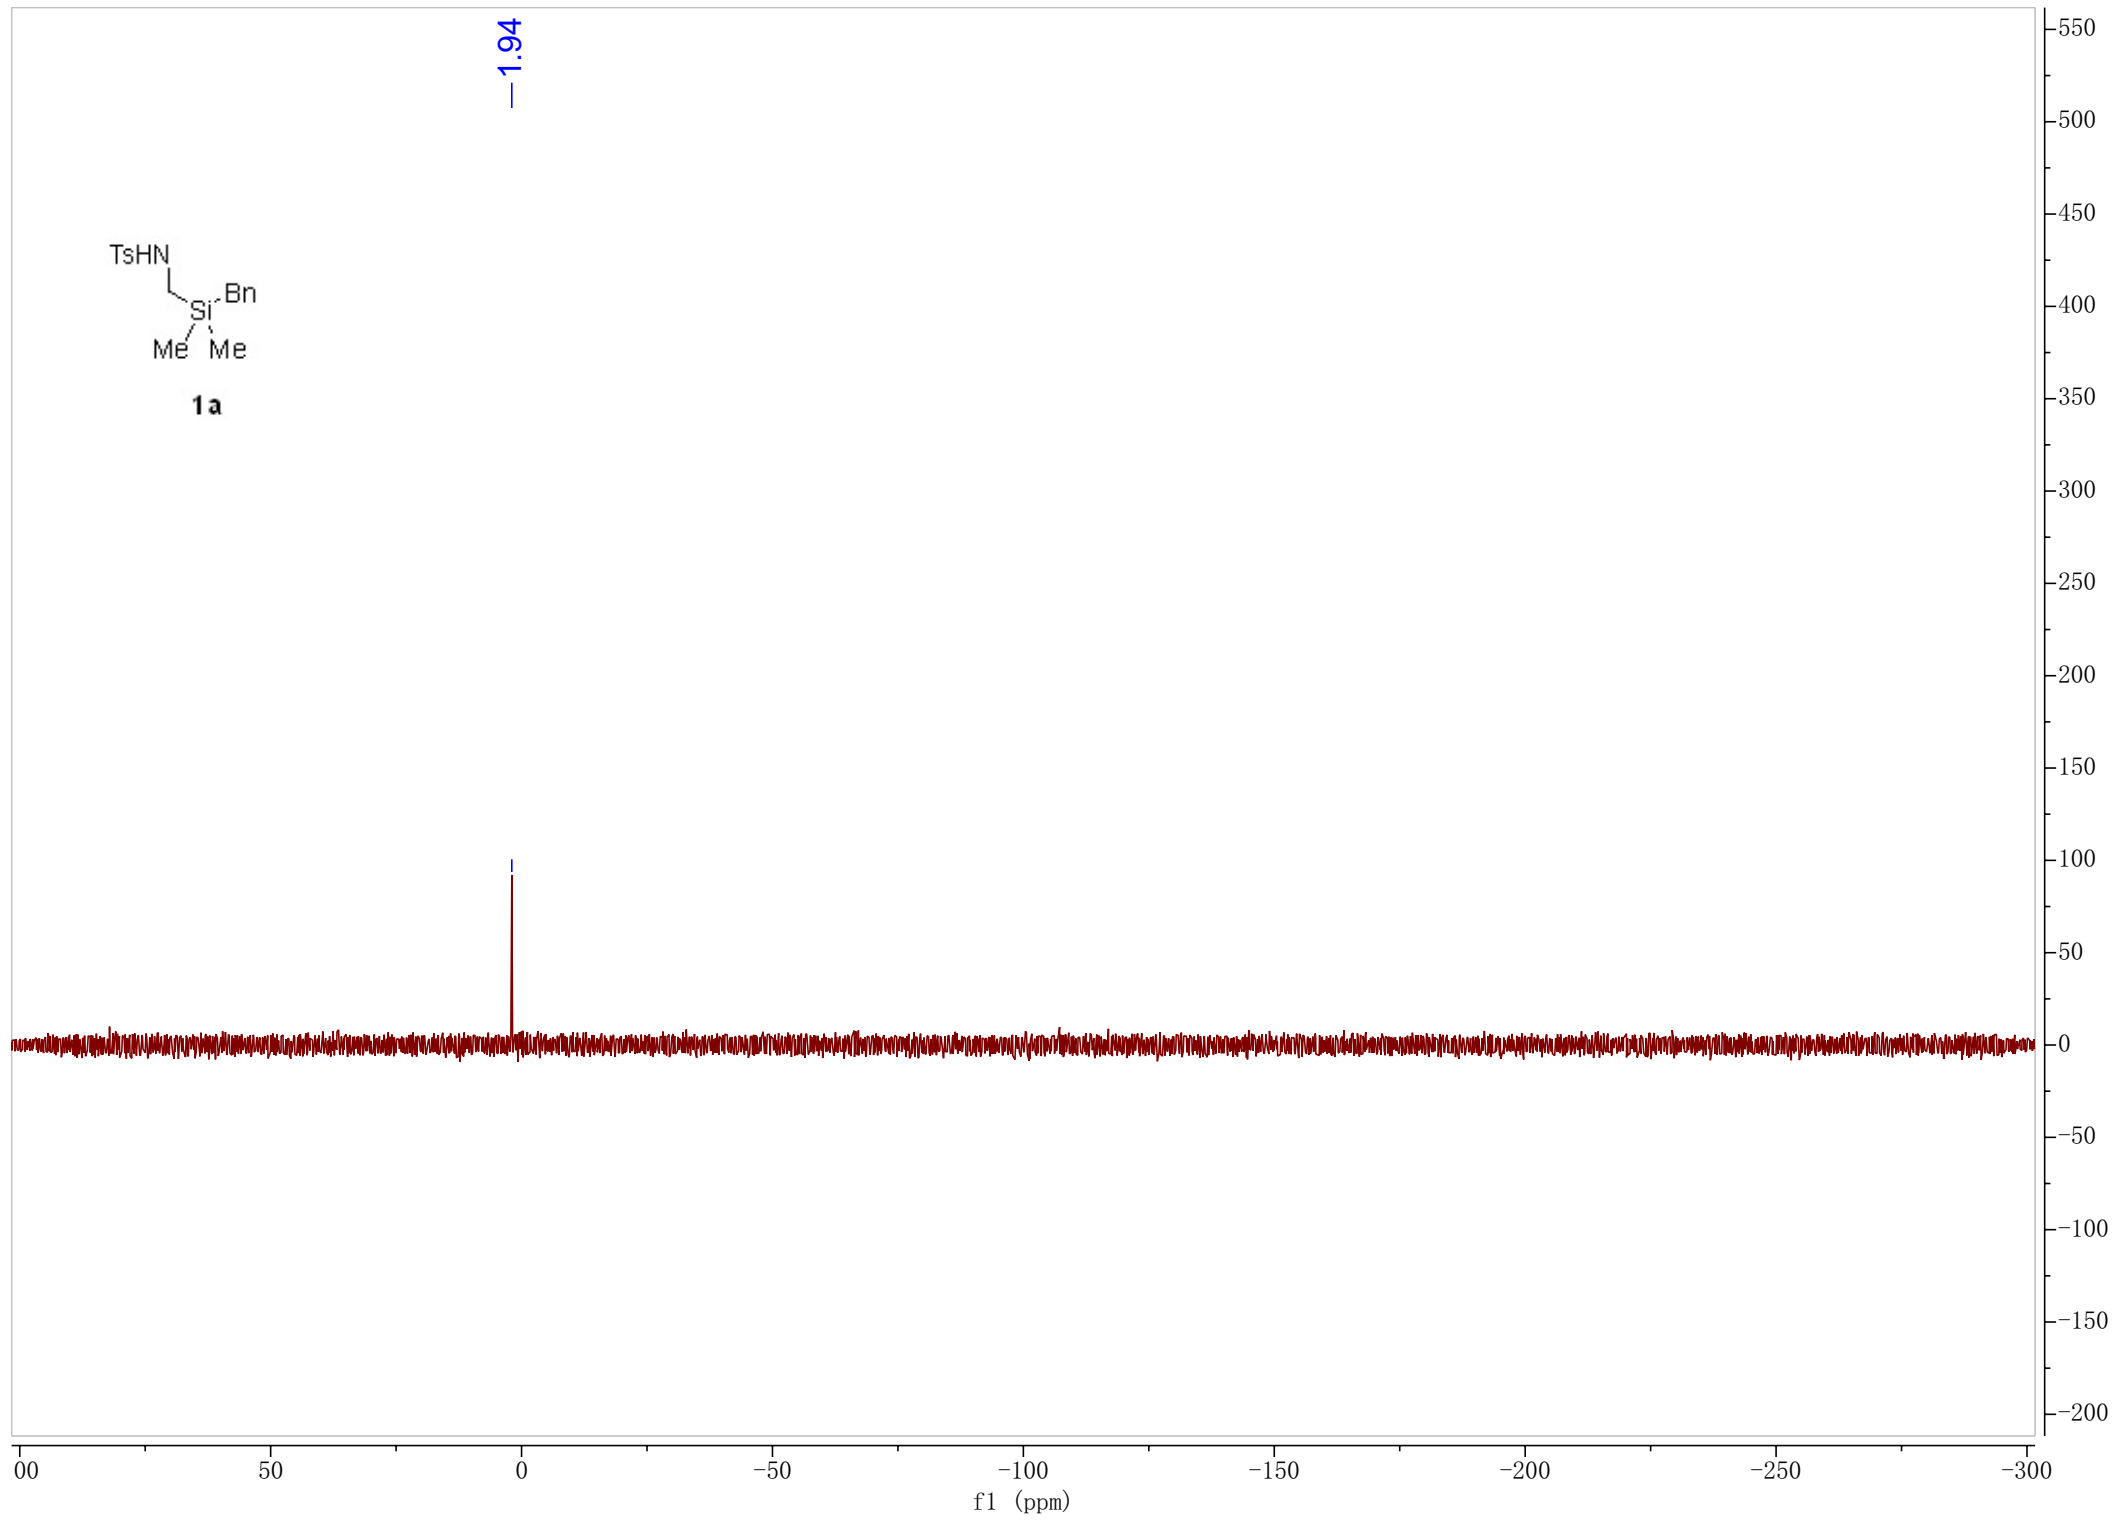

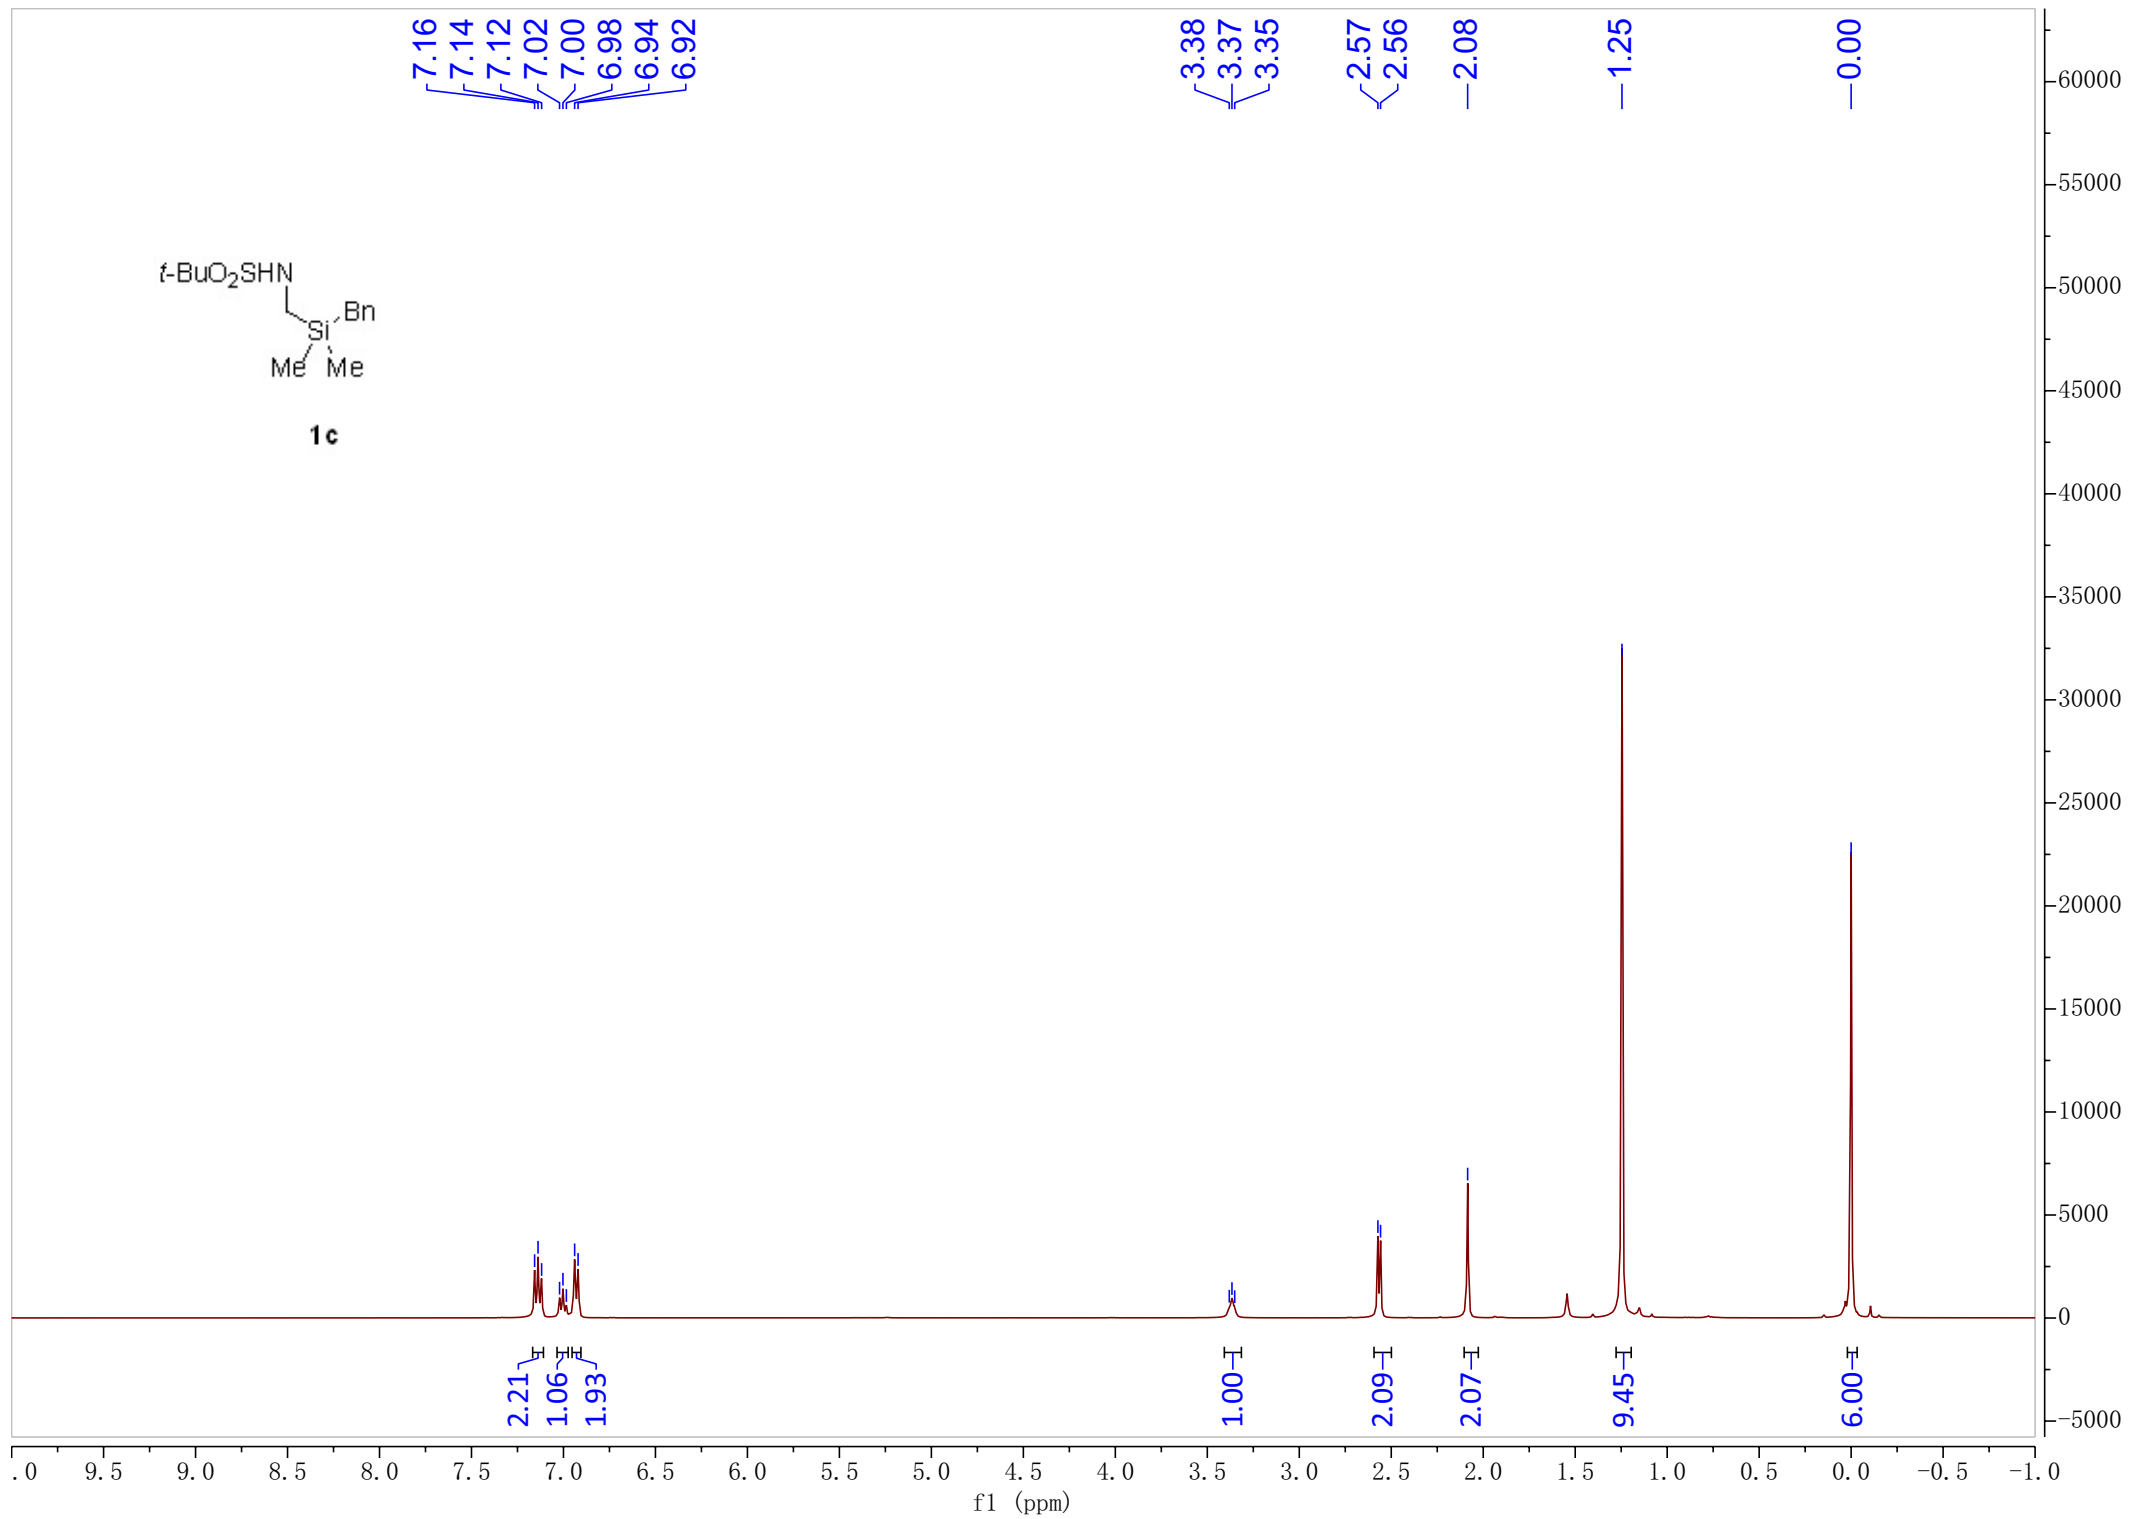

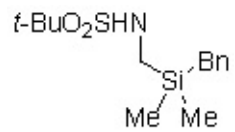

**1c**

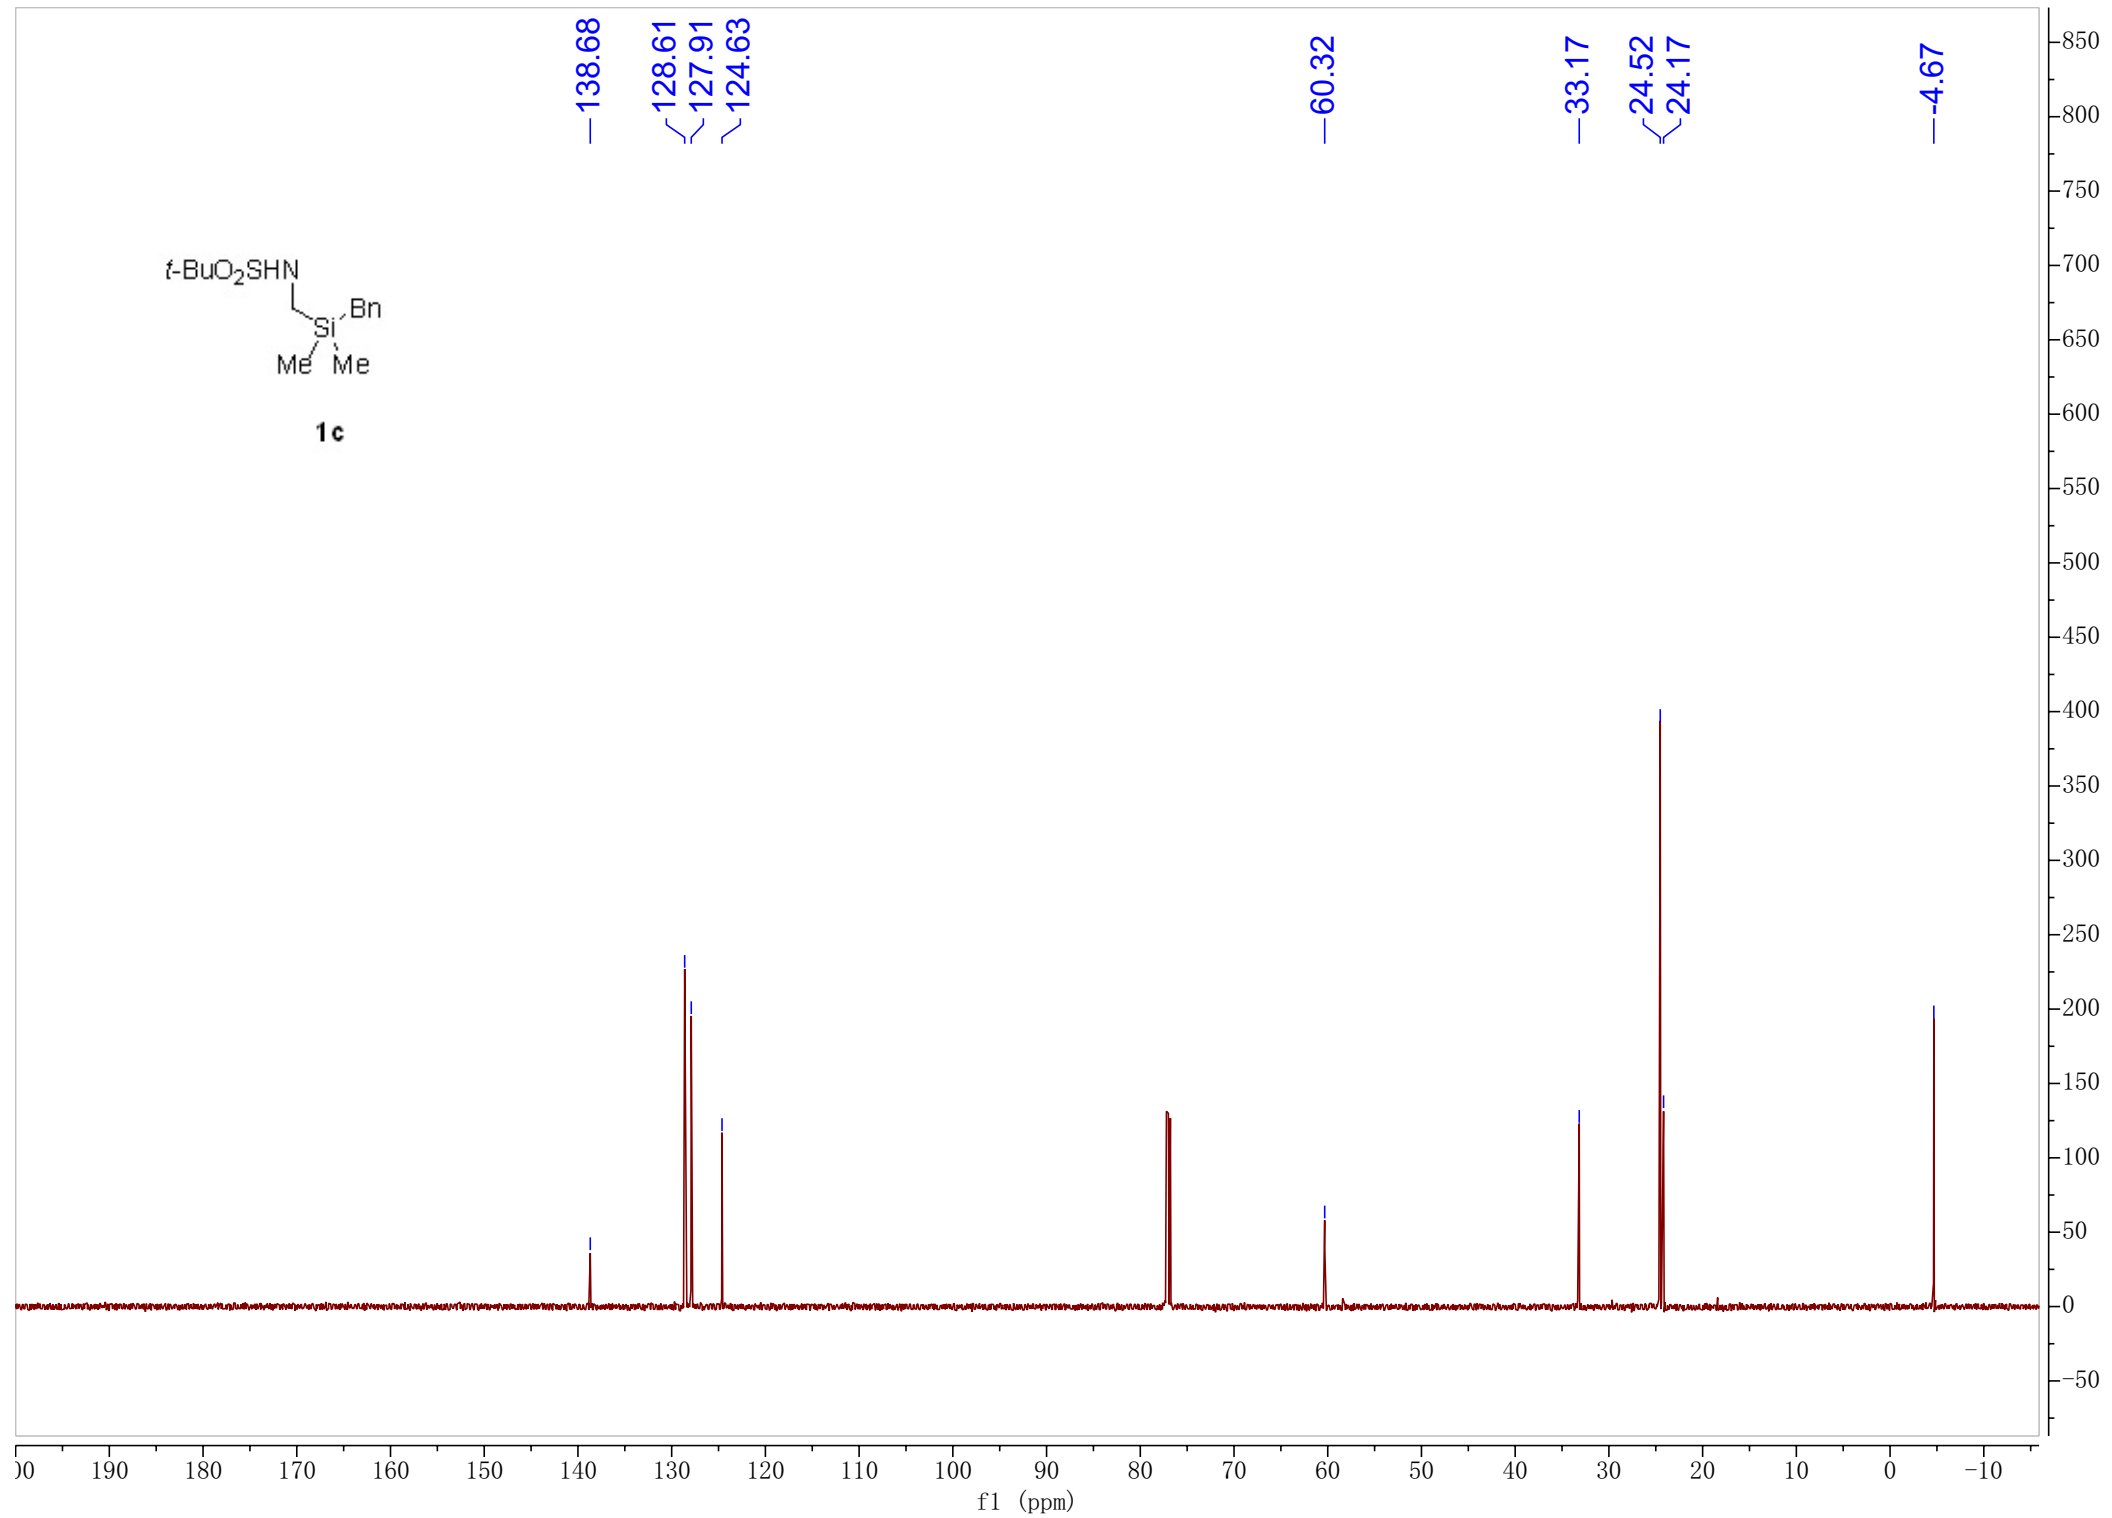





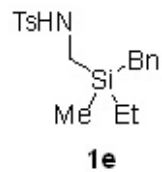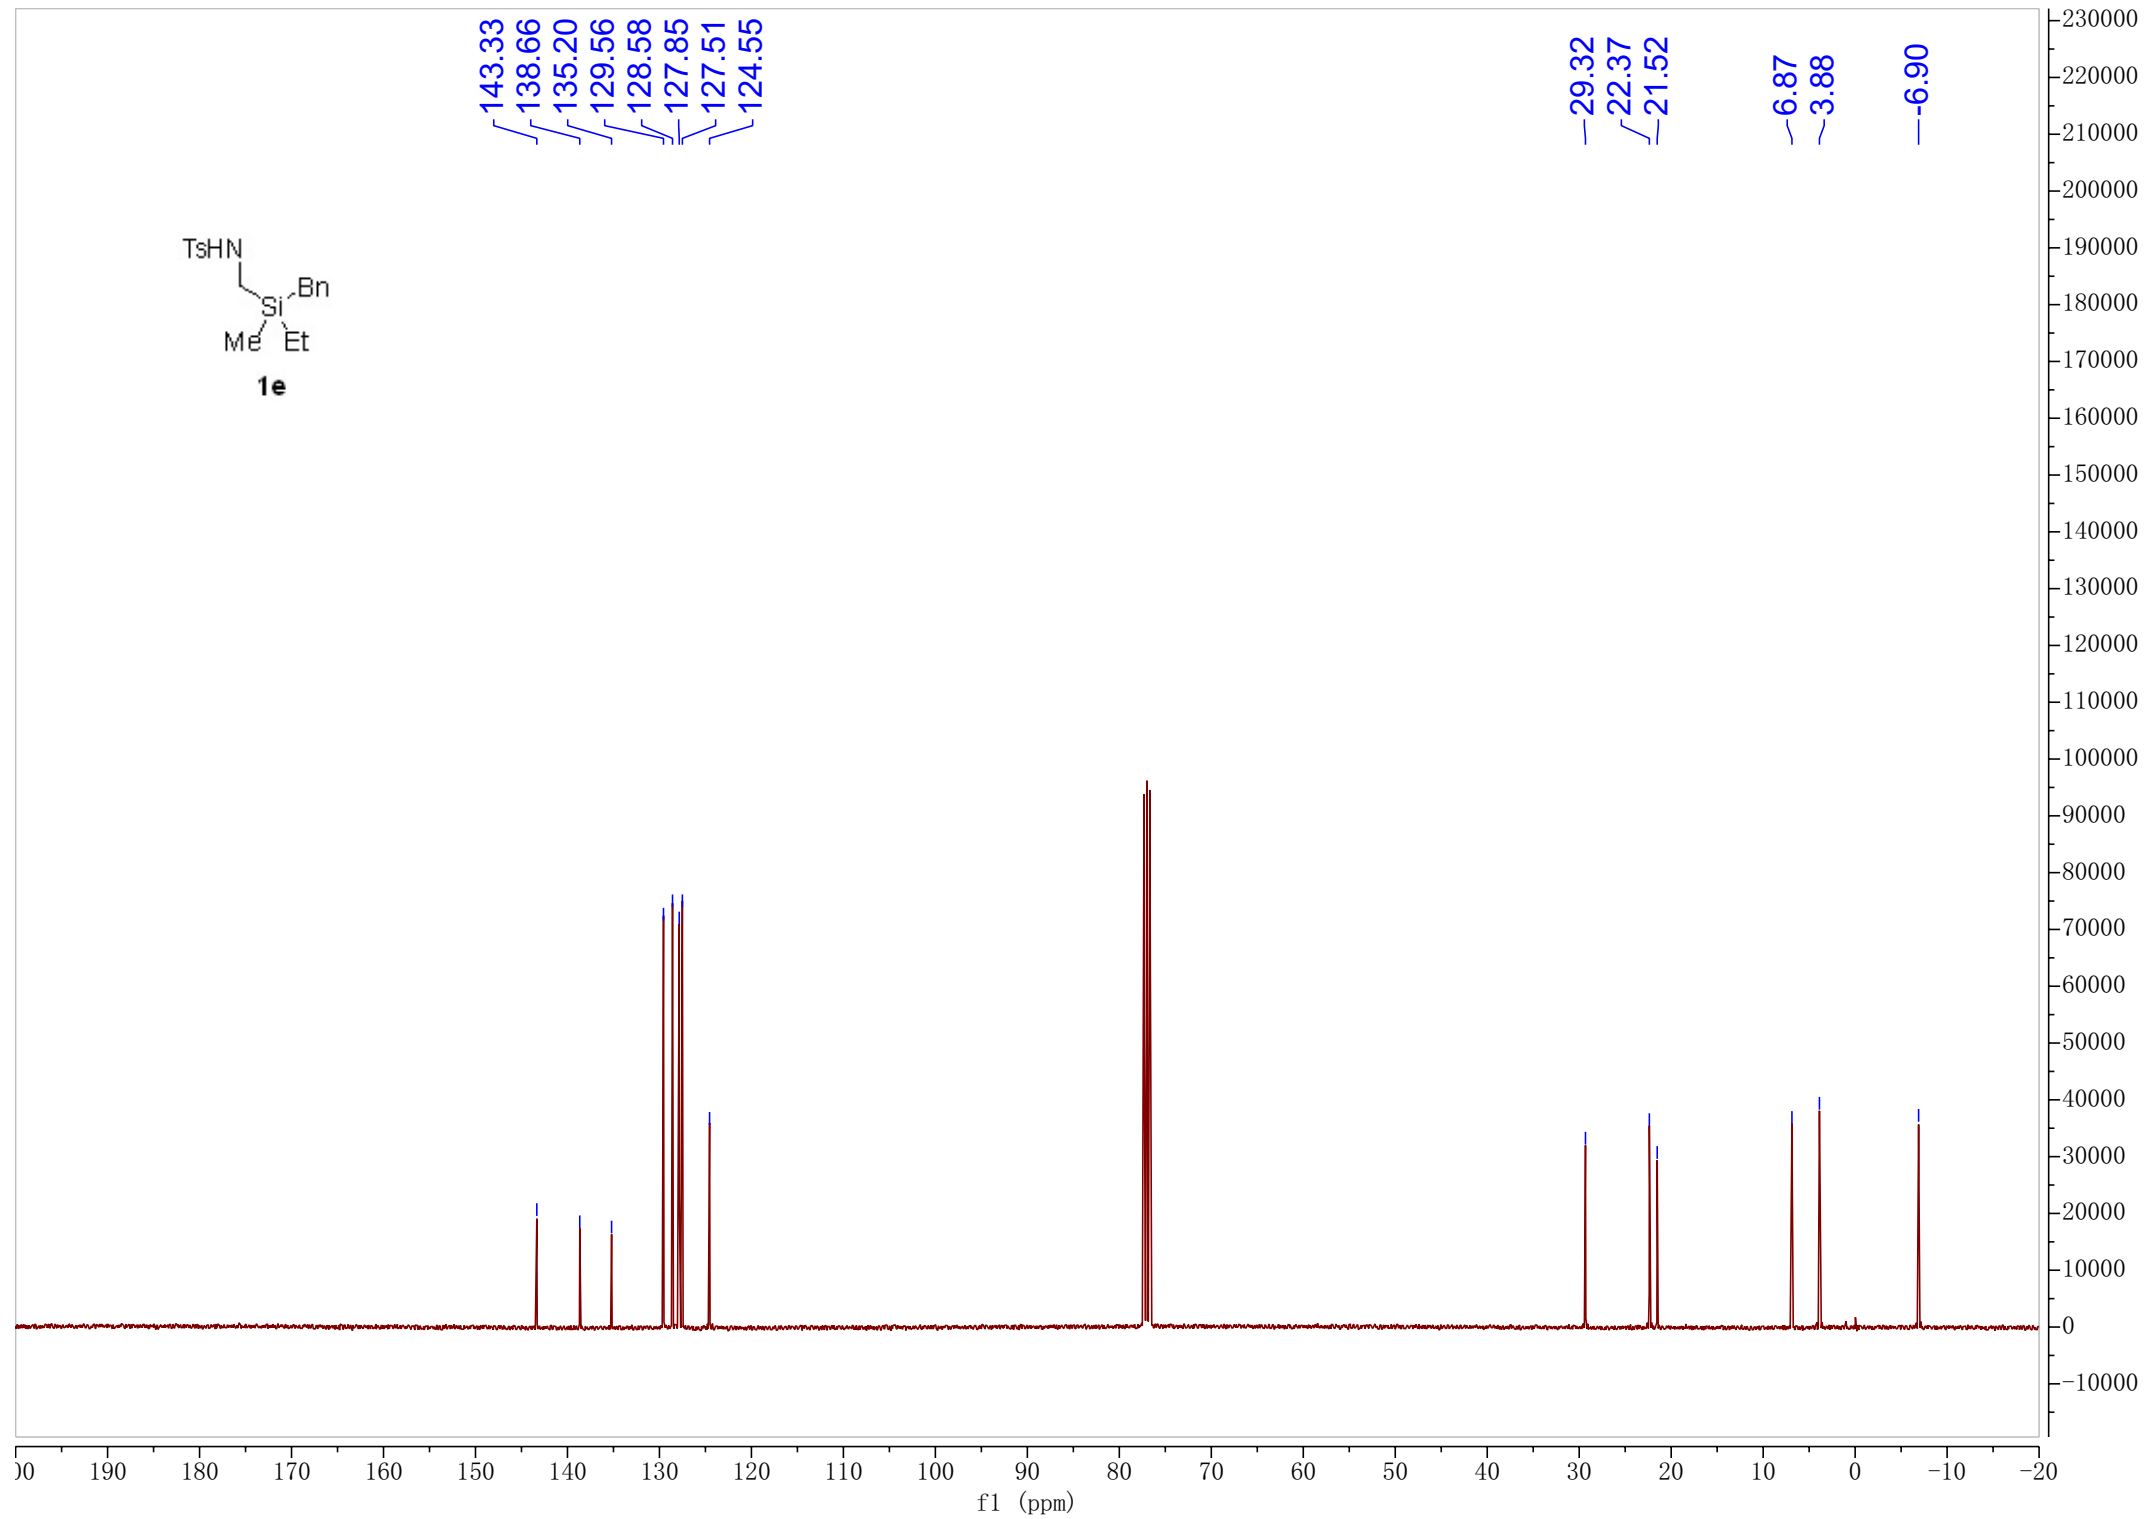

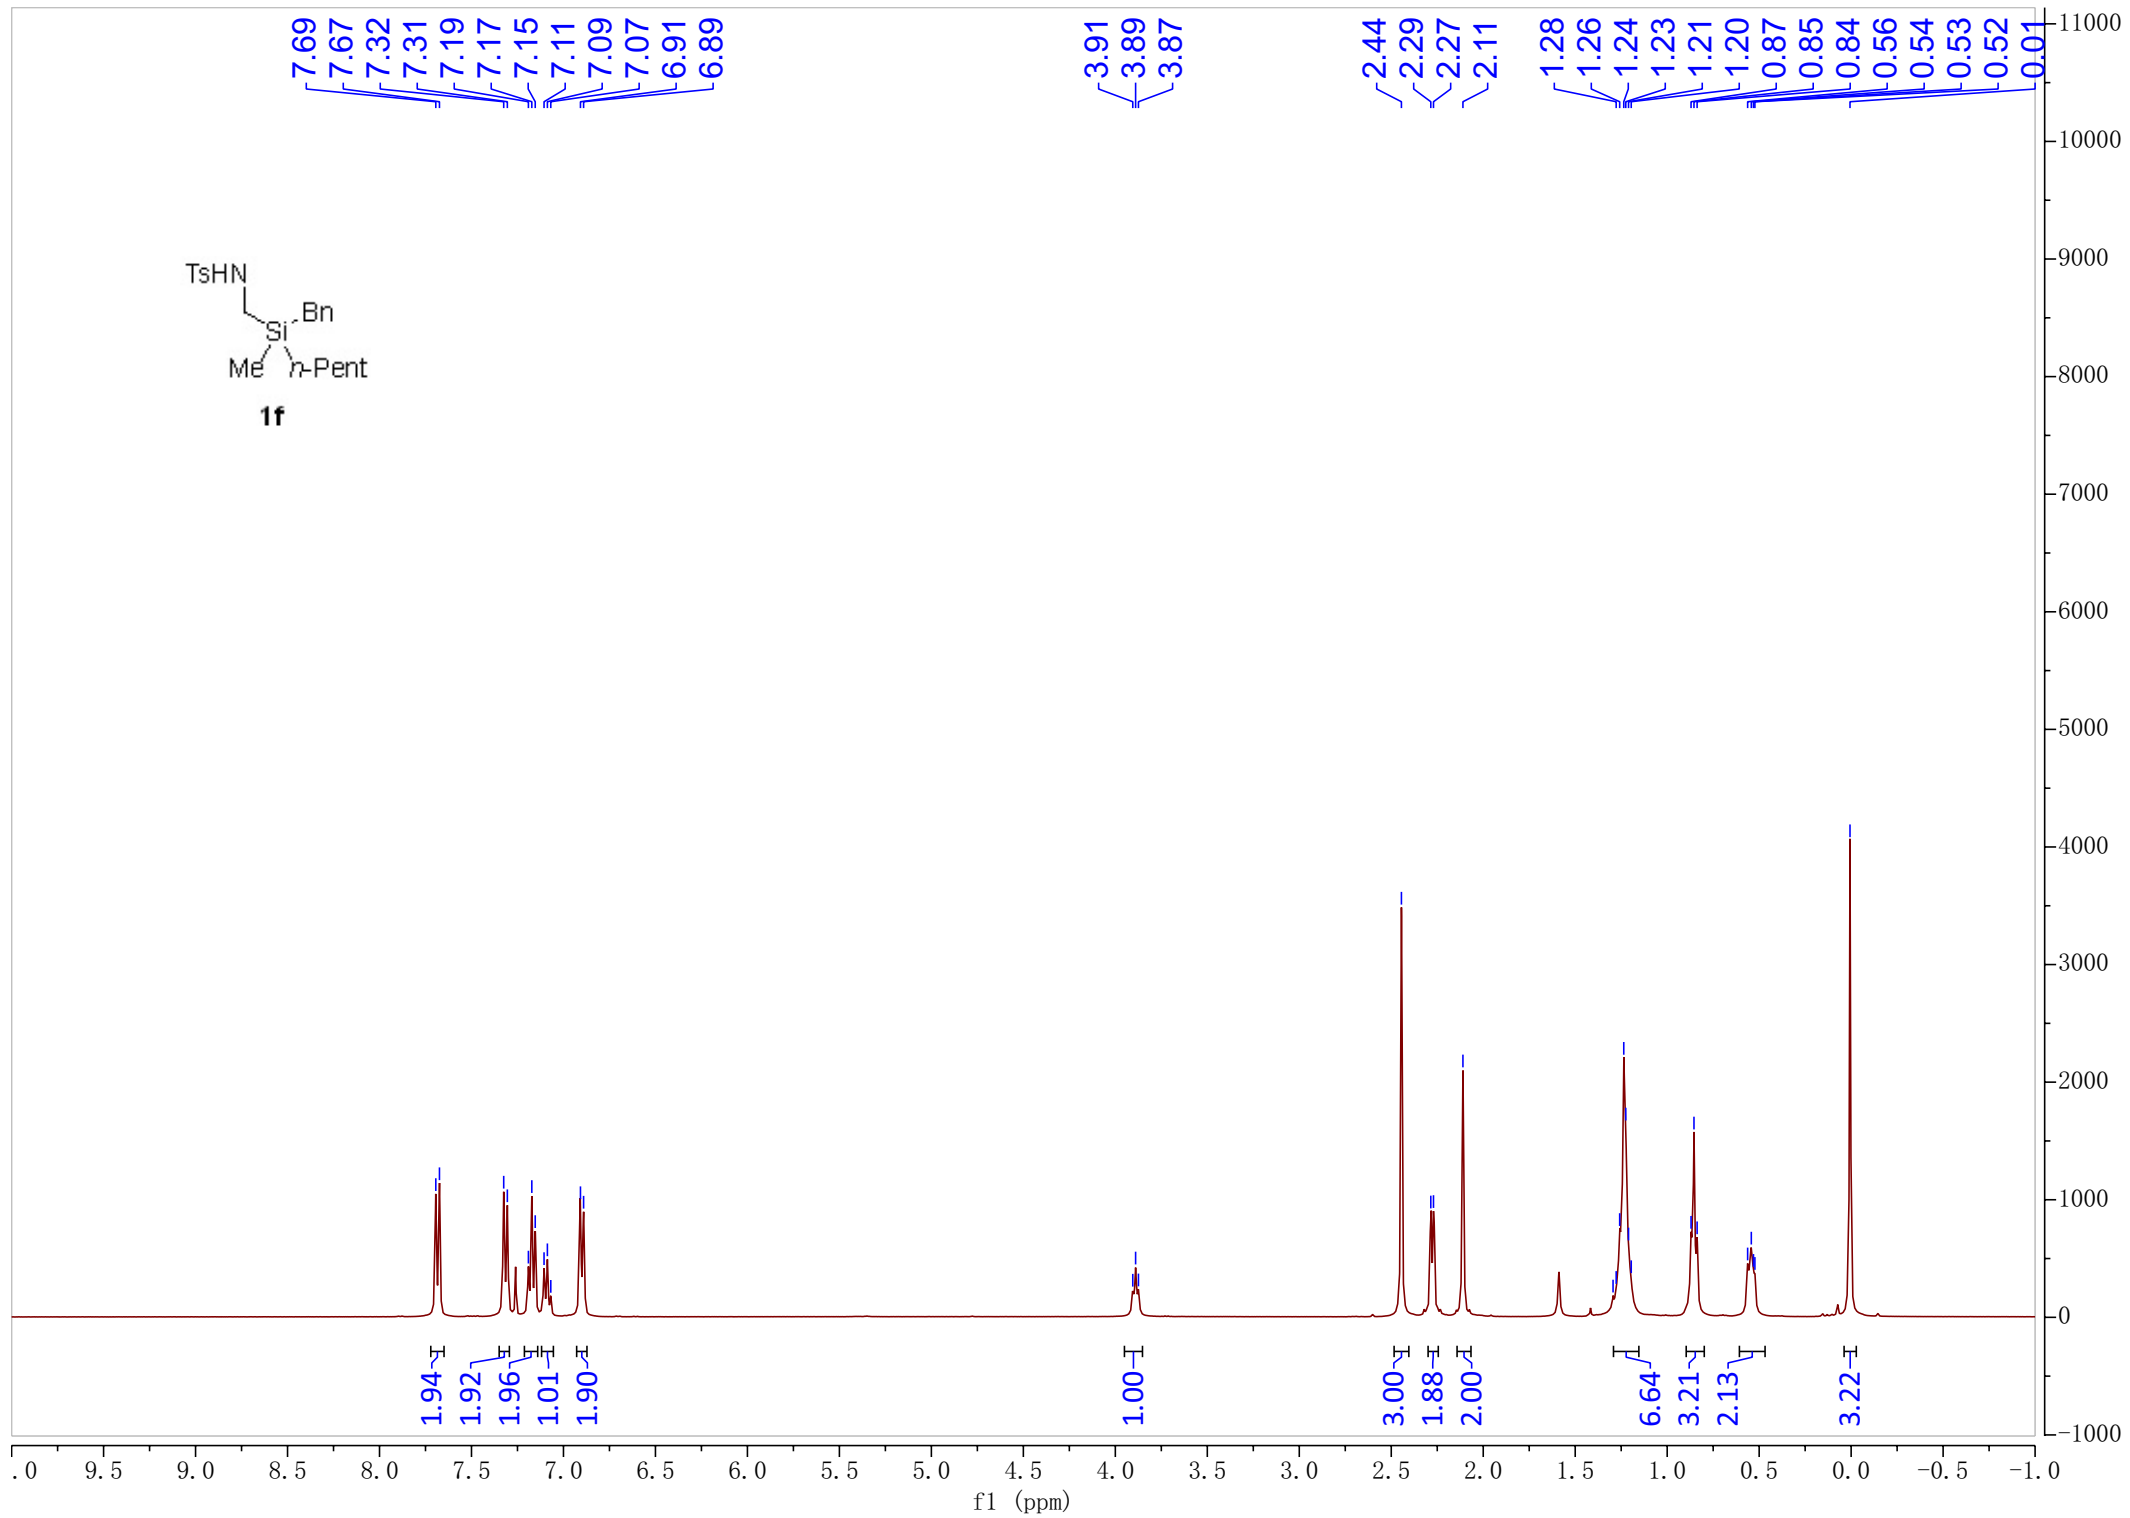

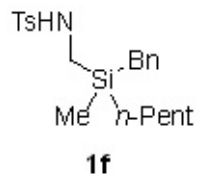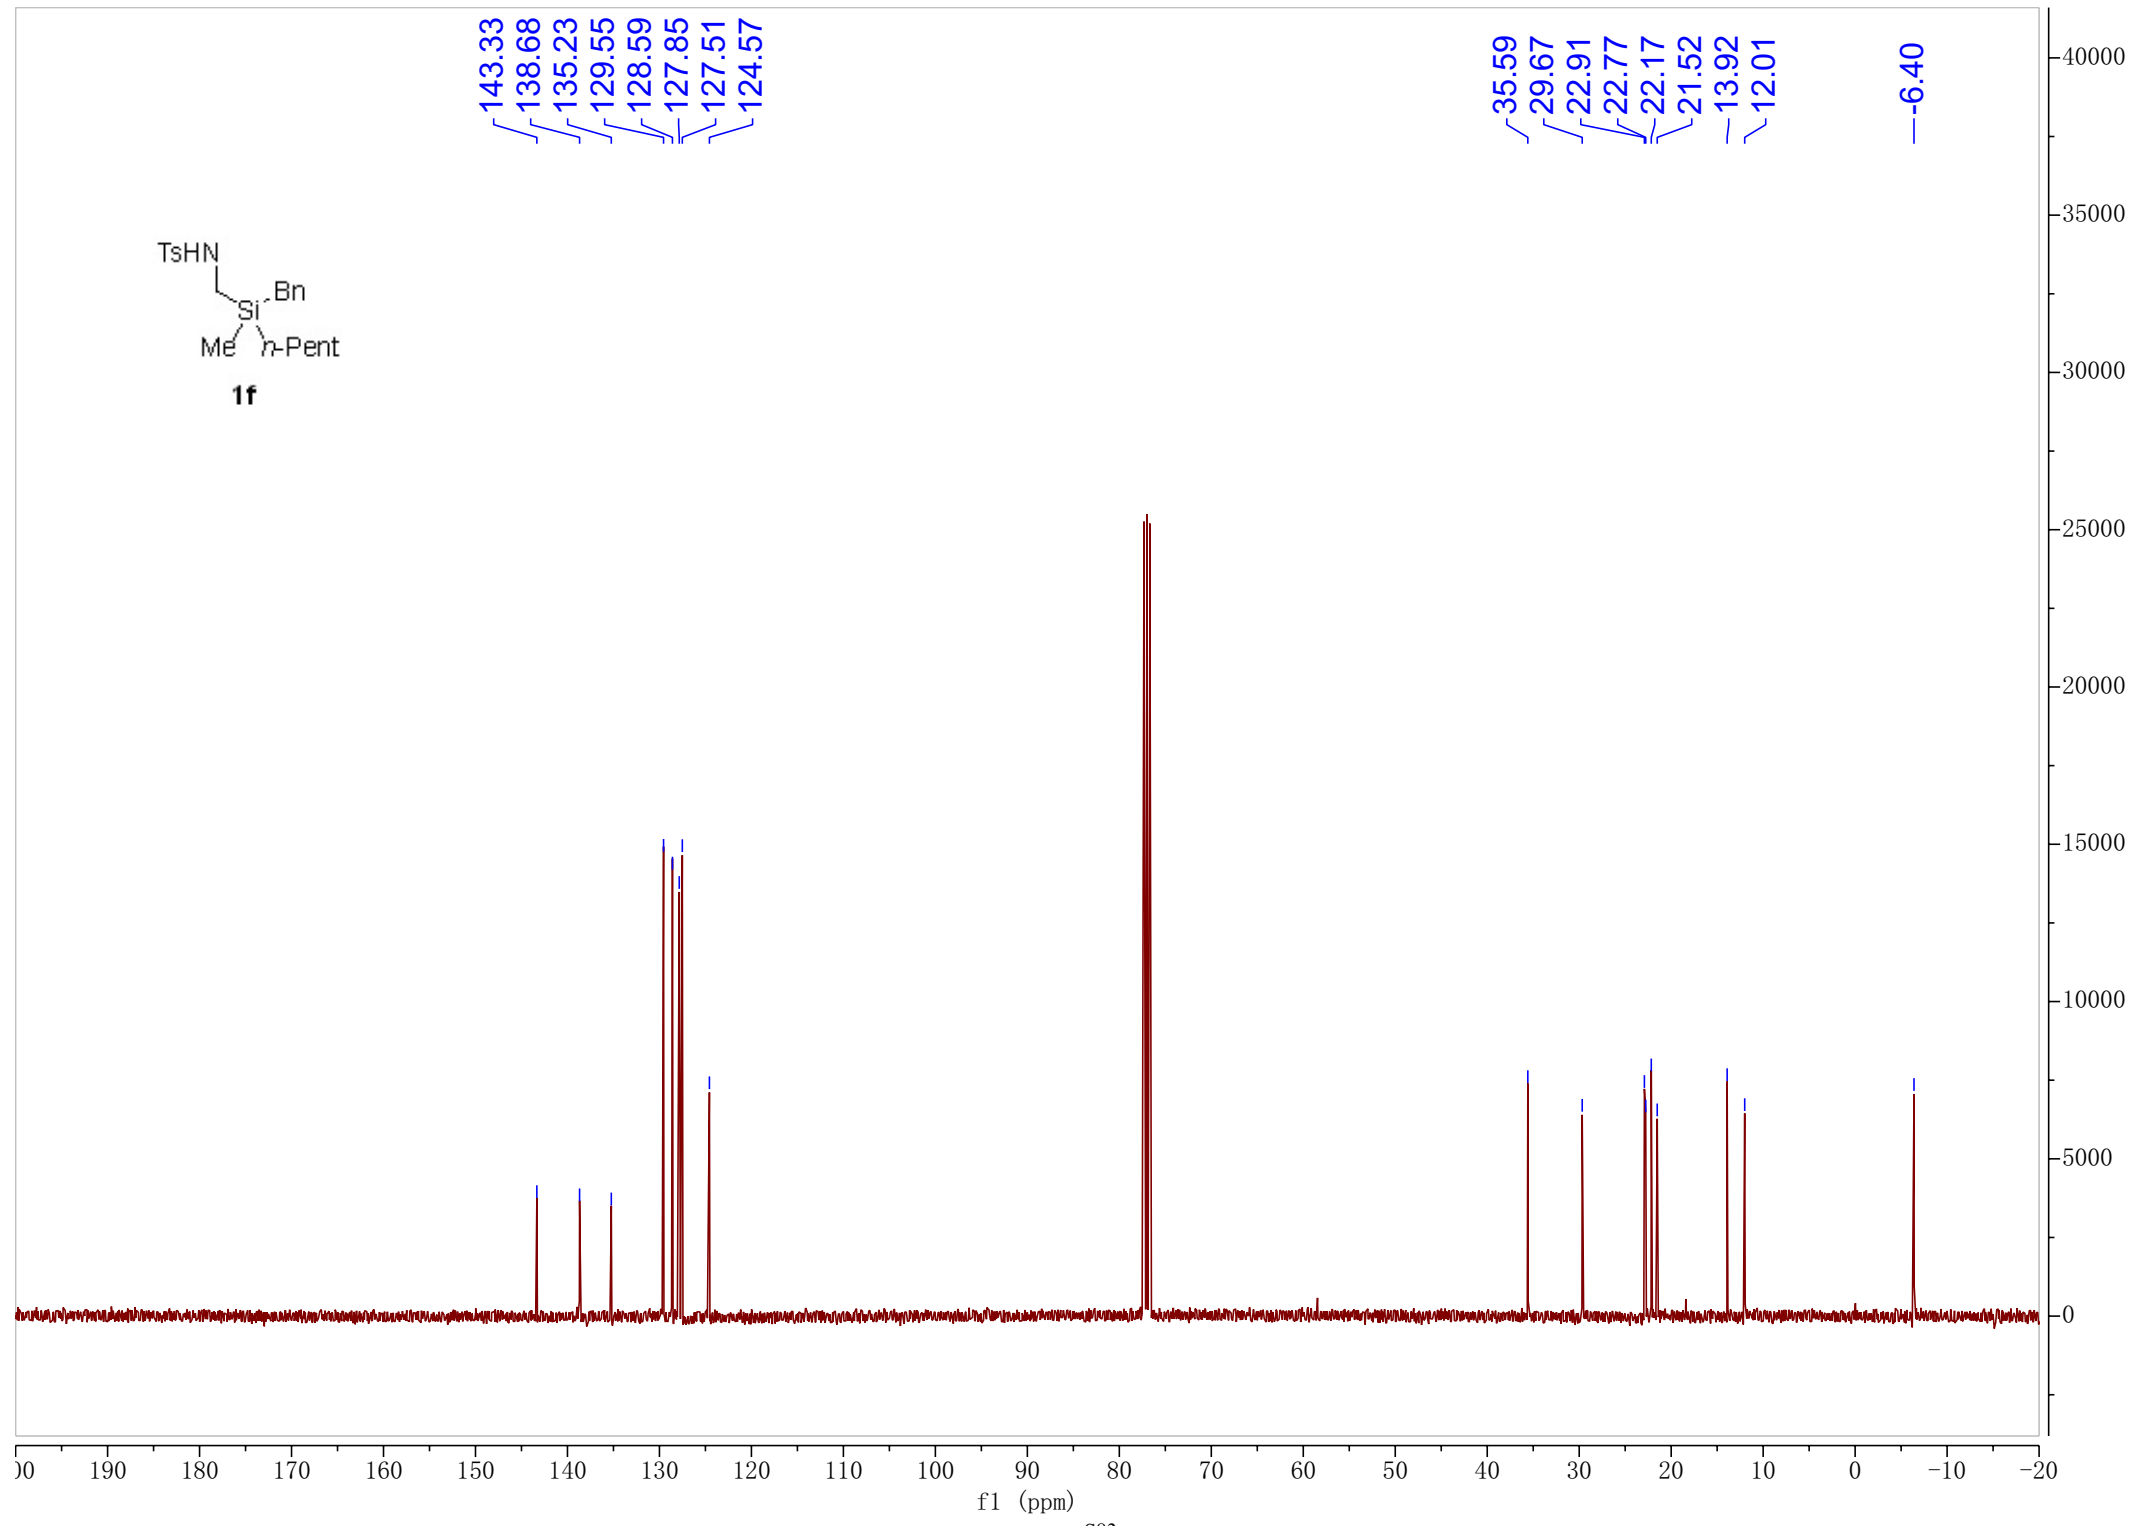



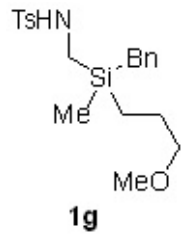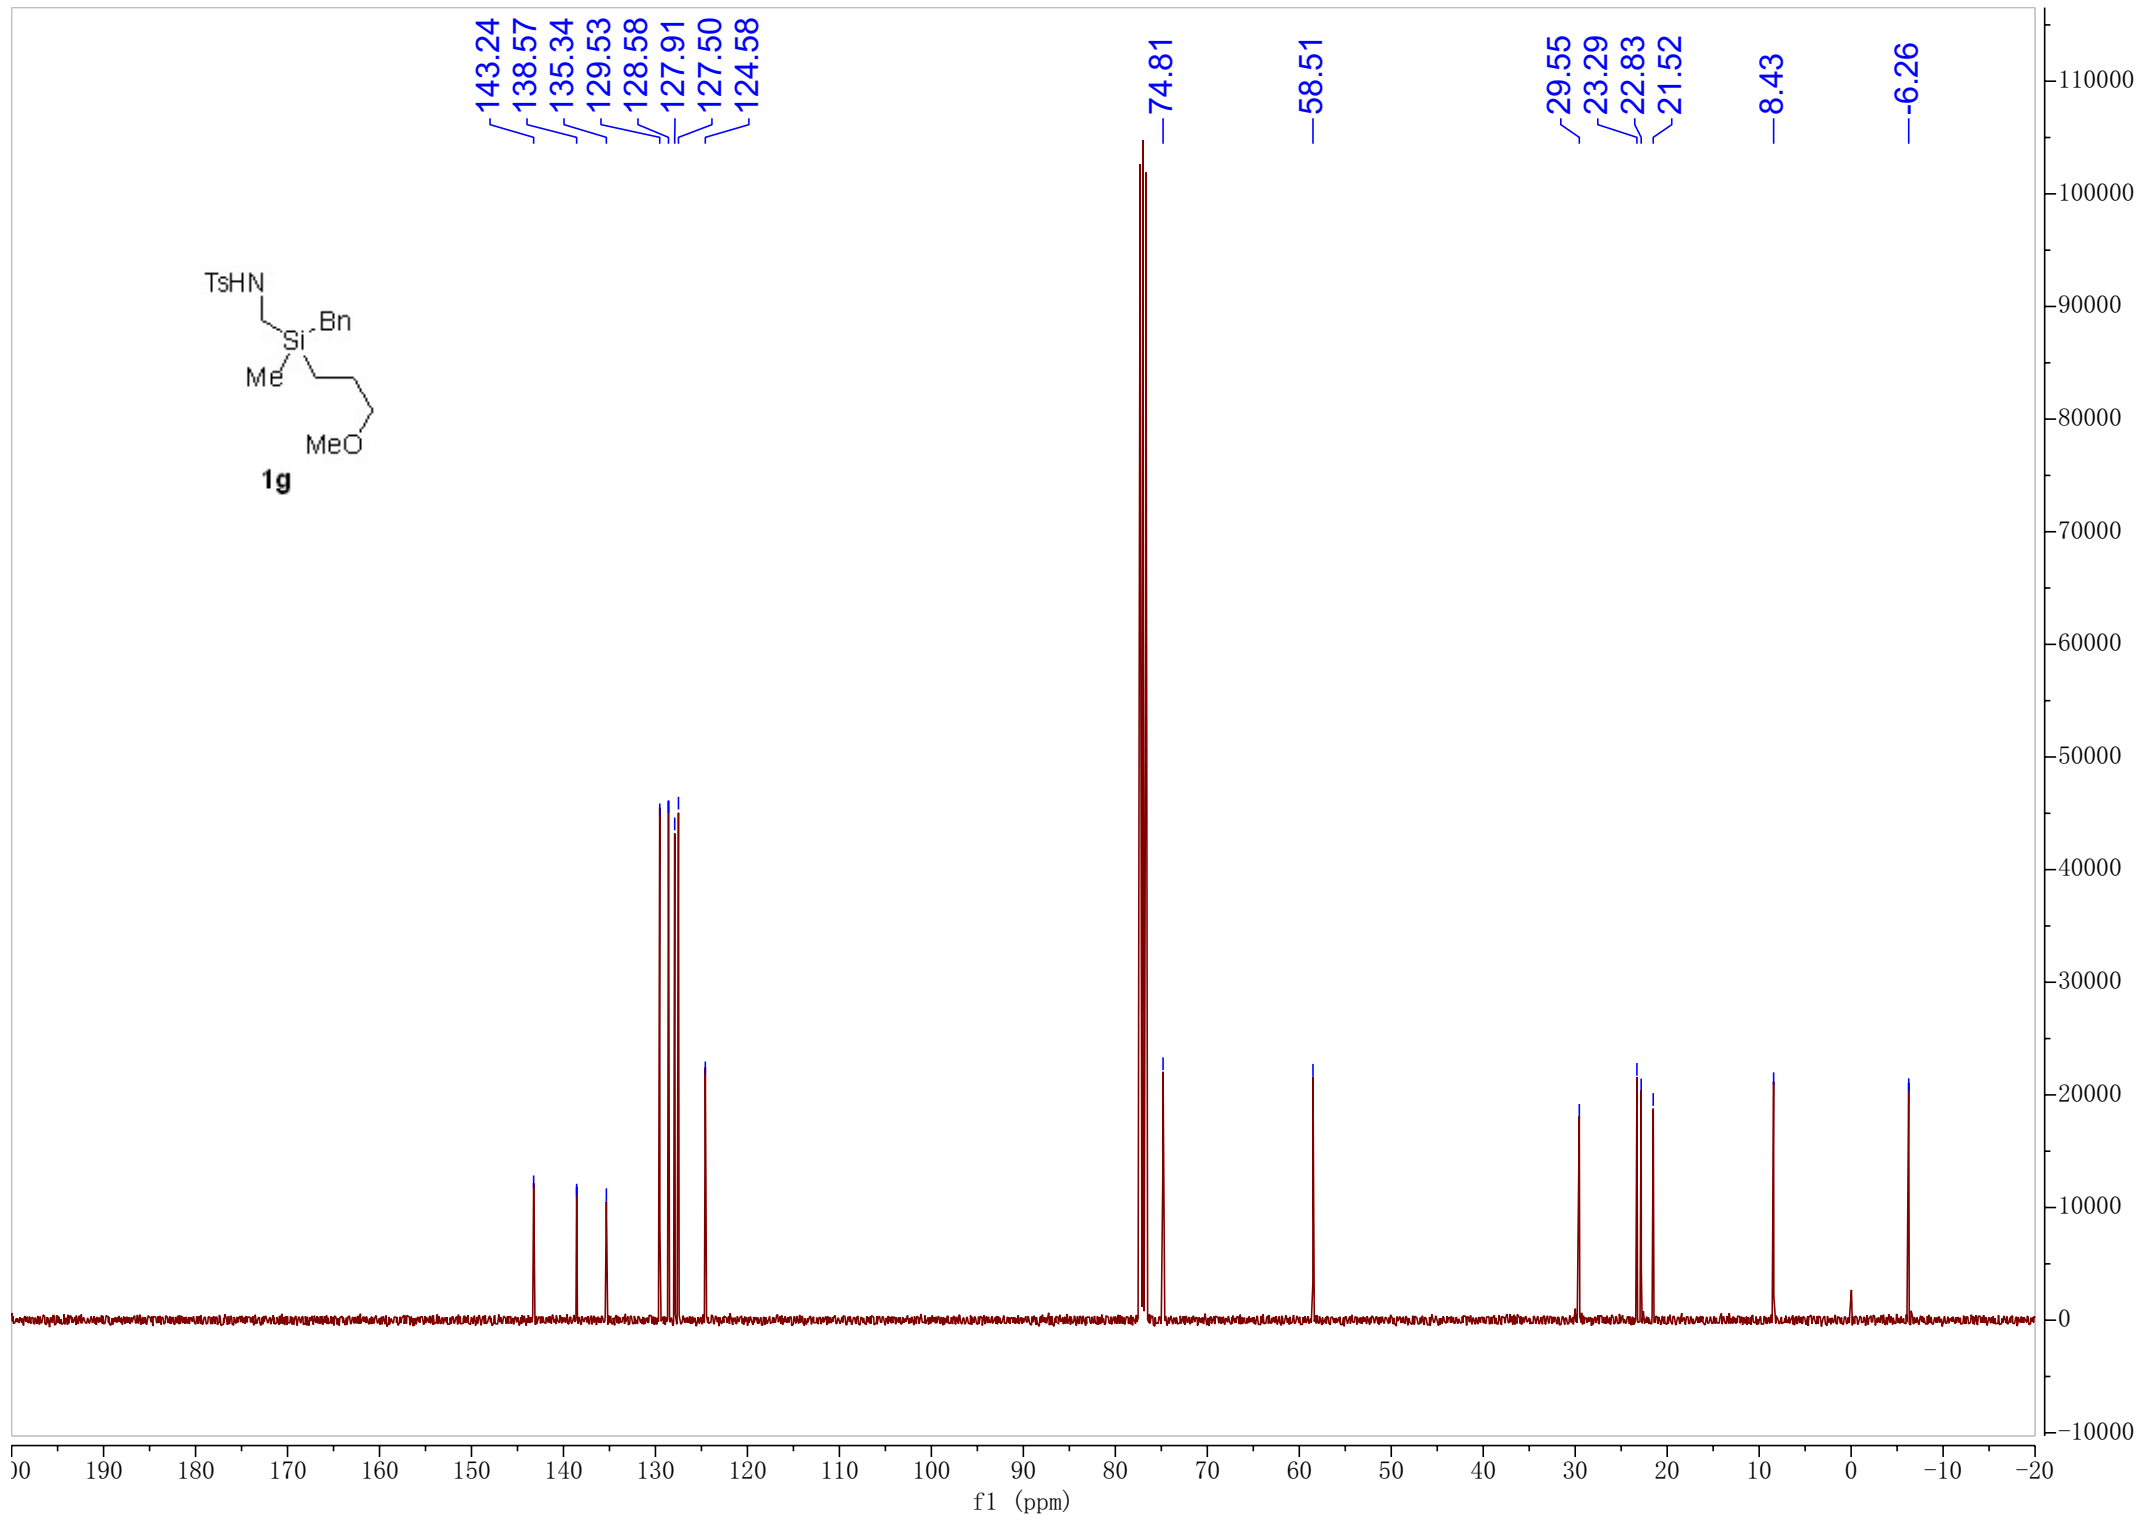

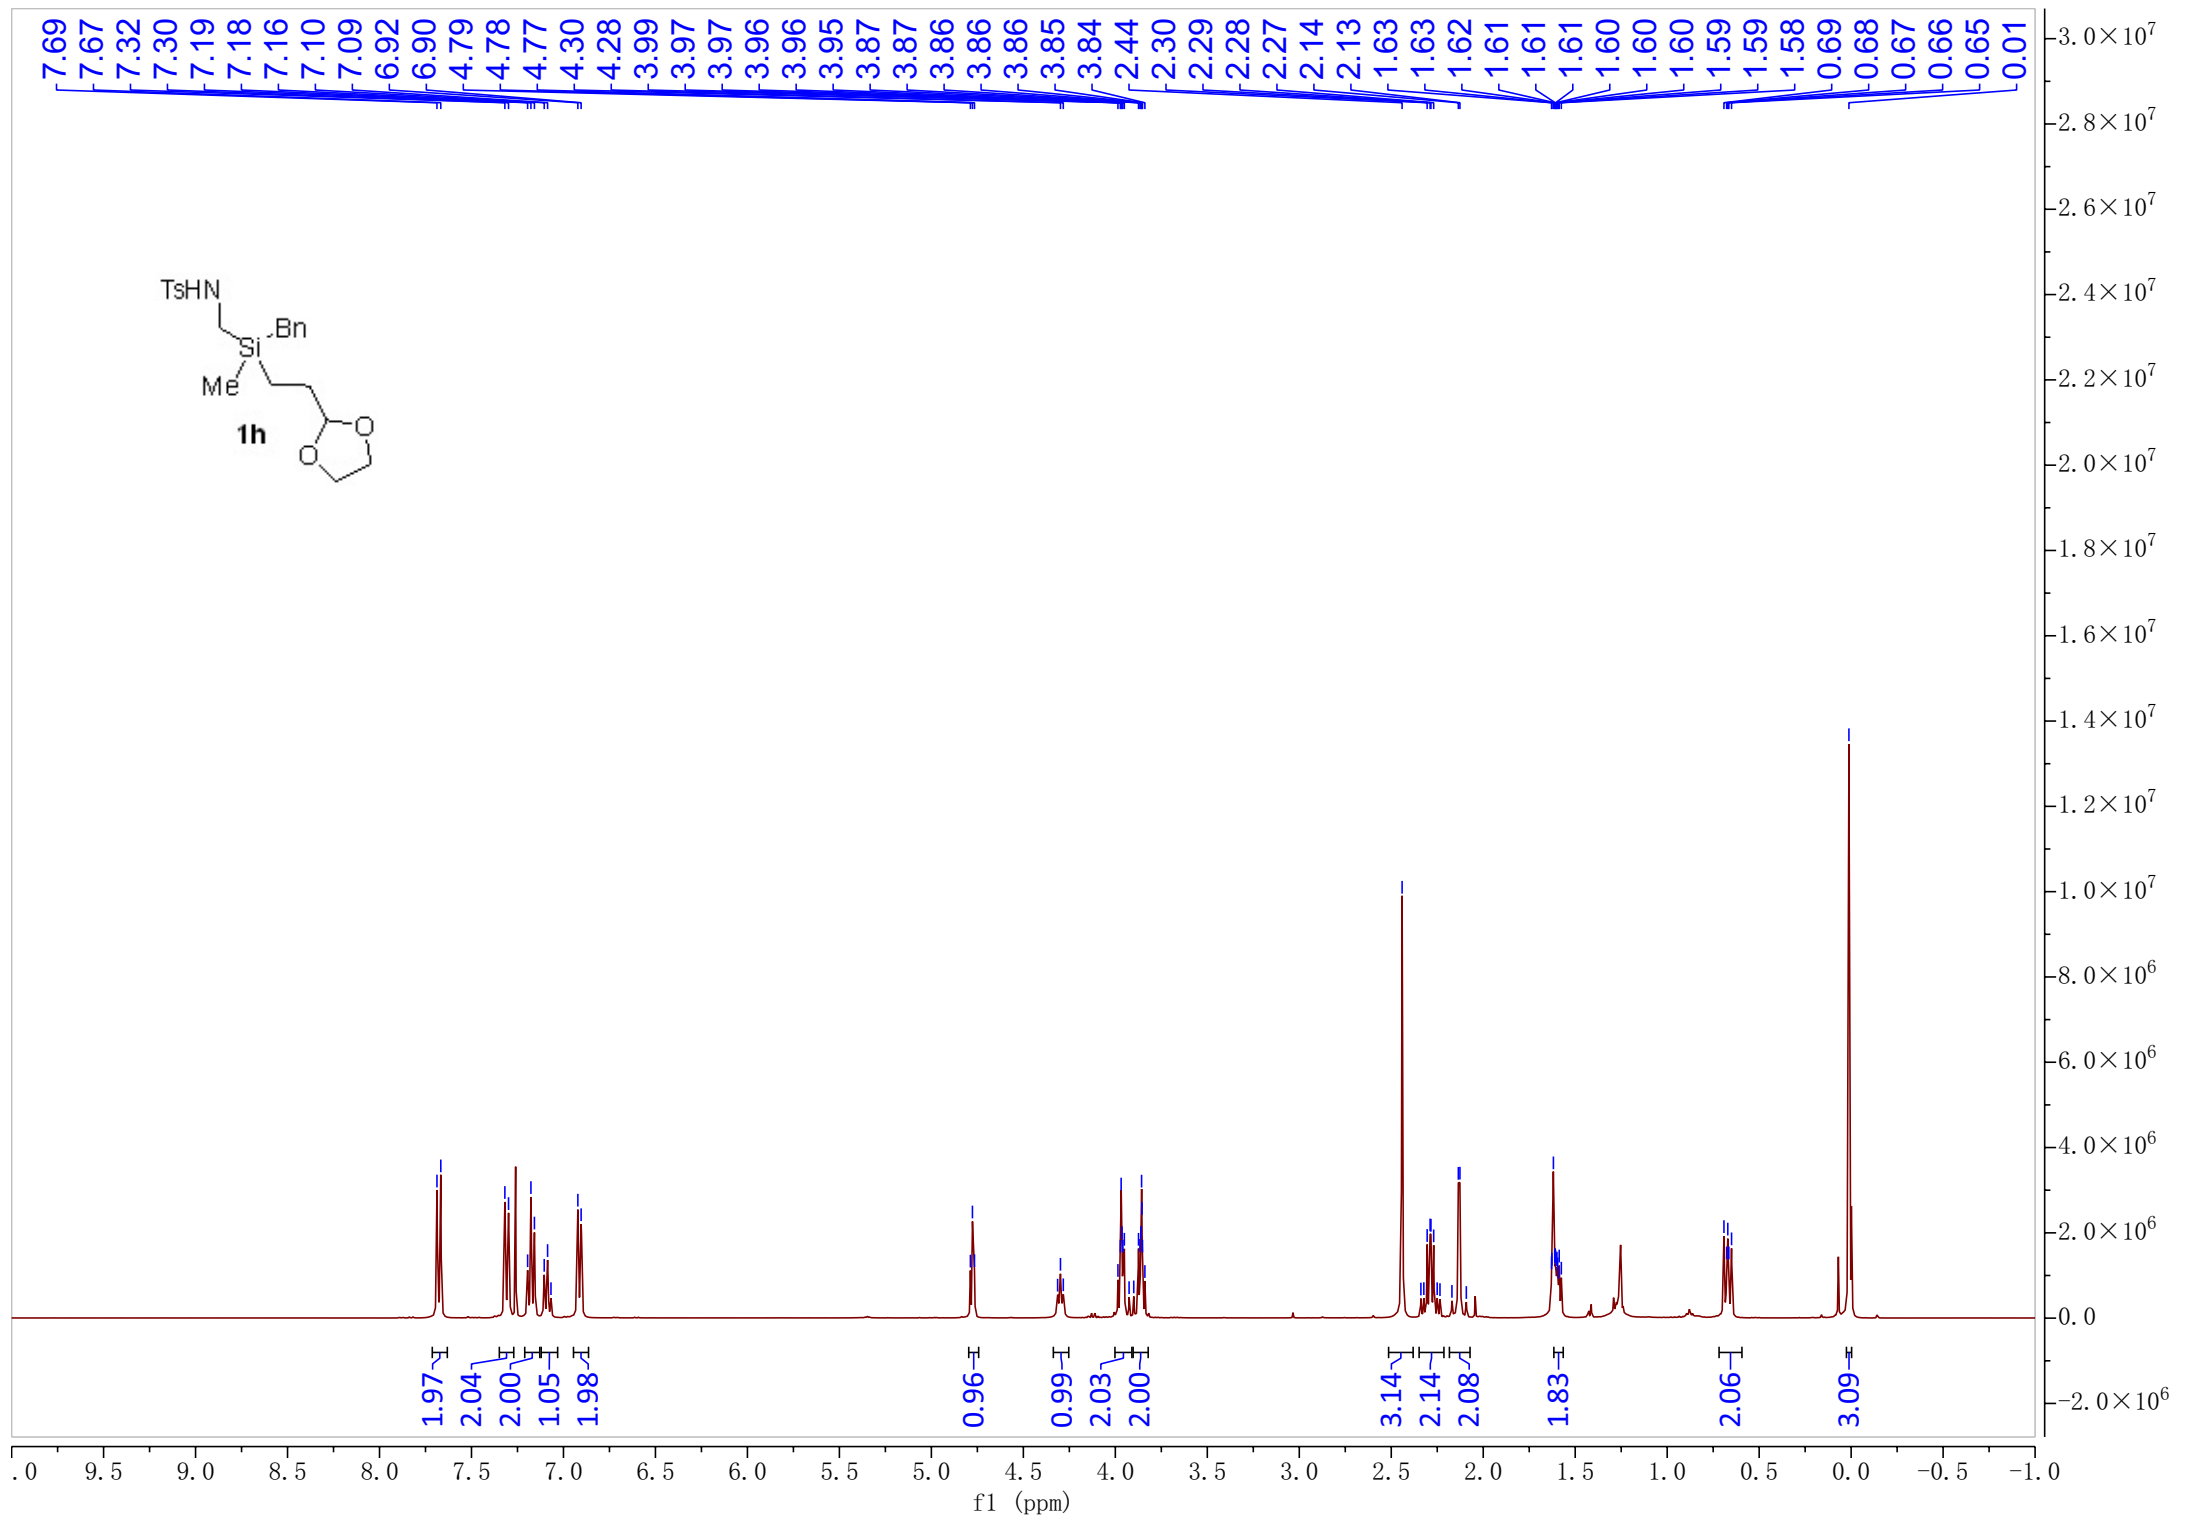

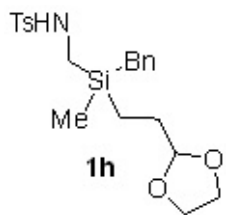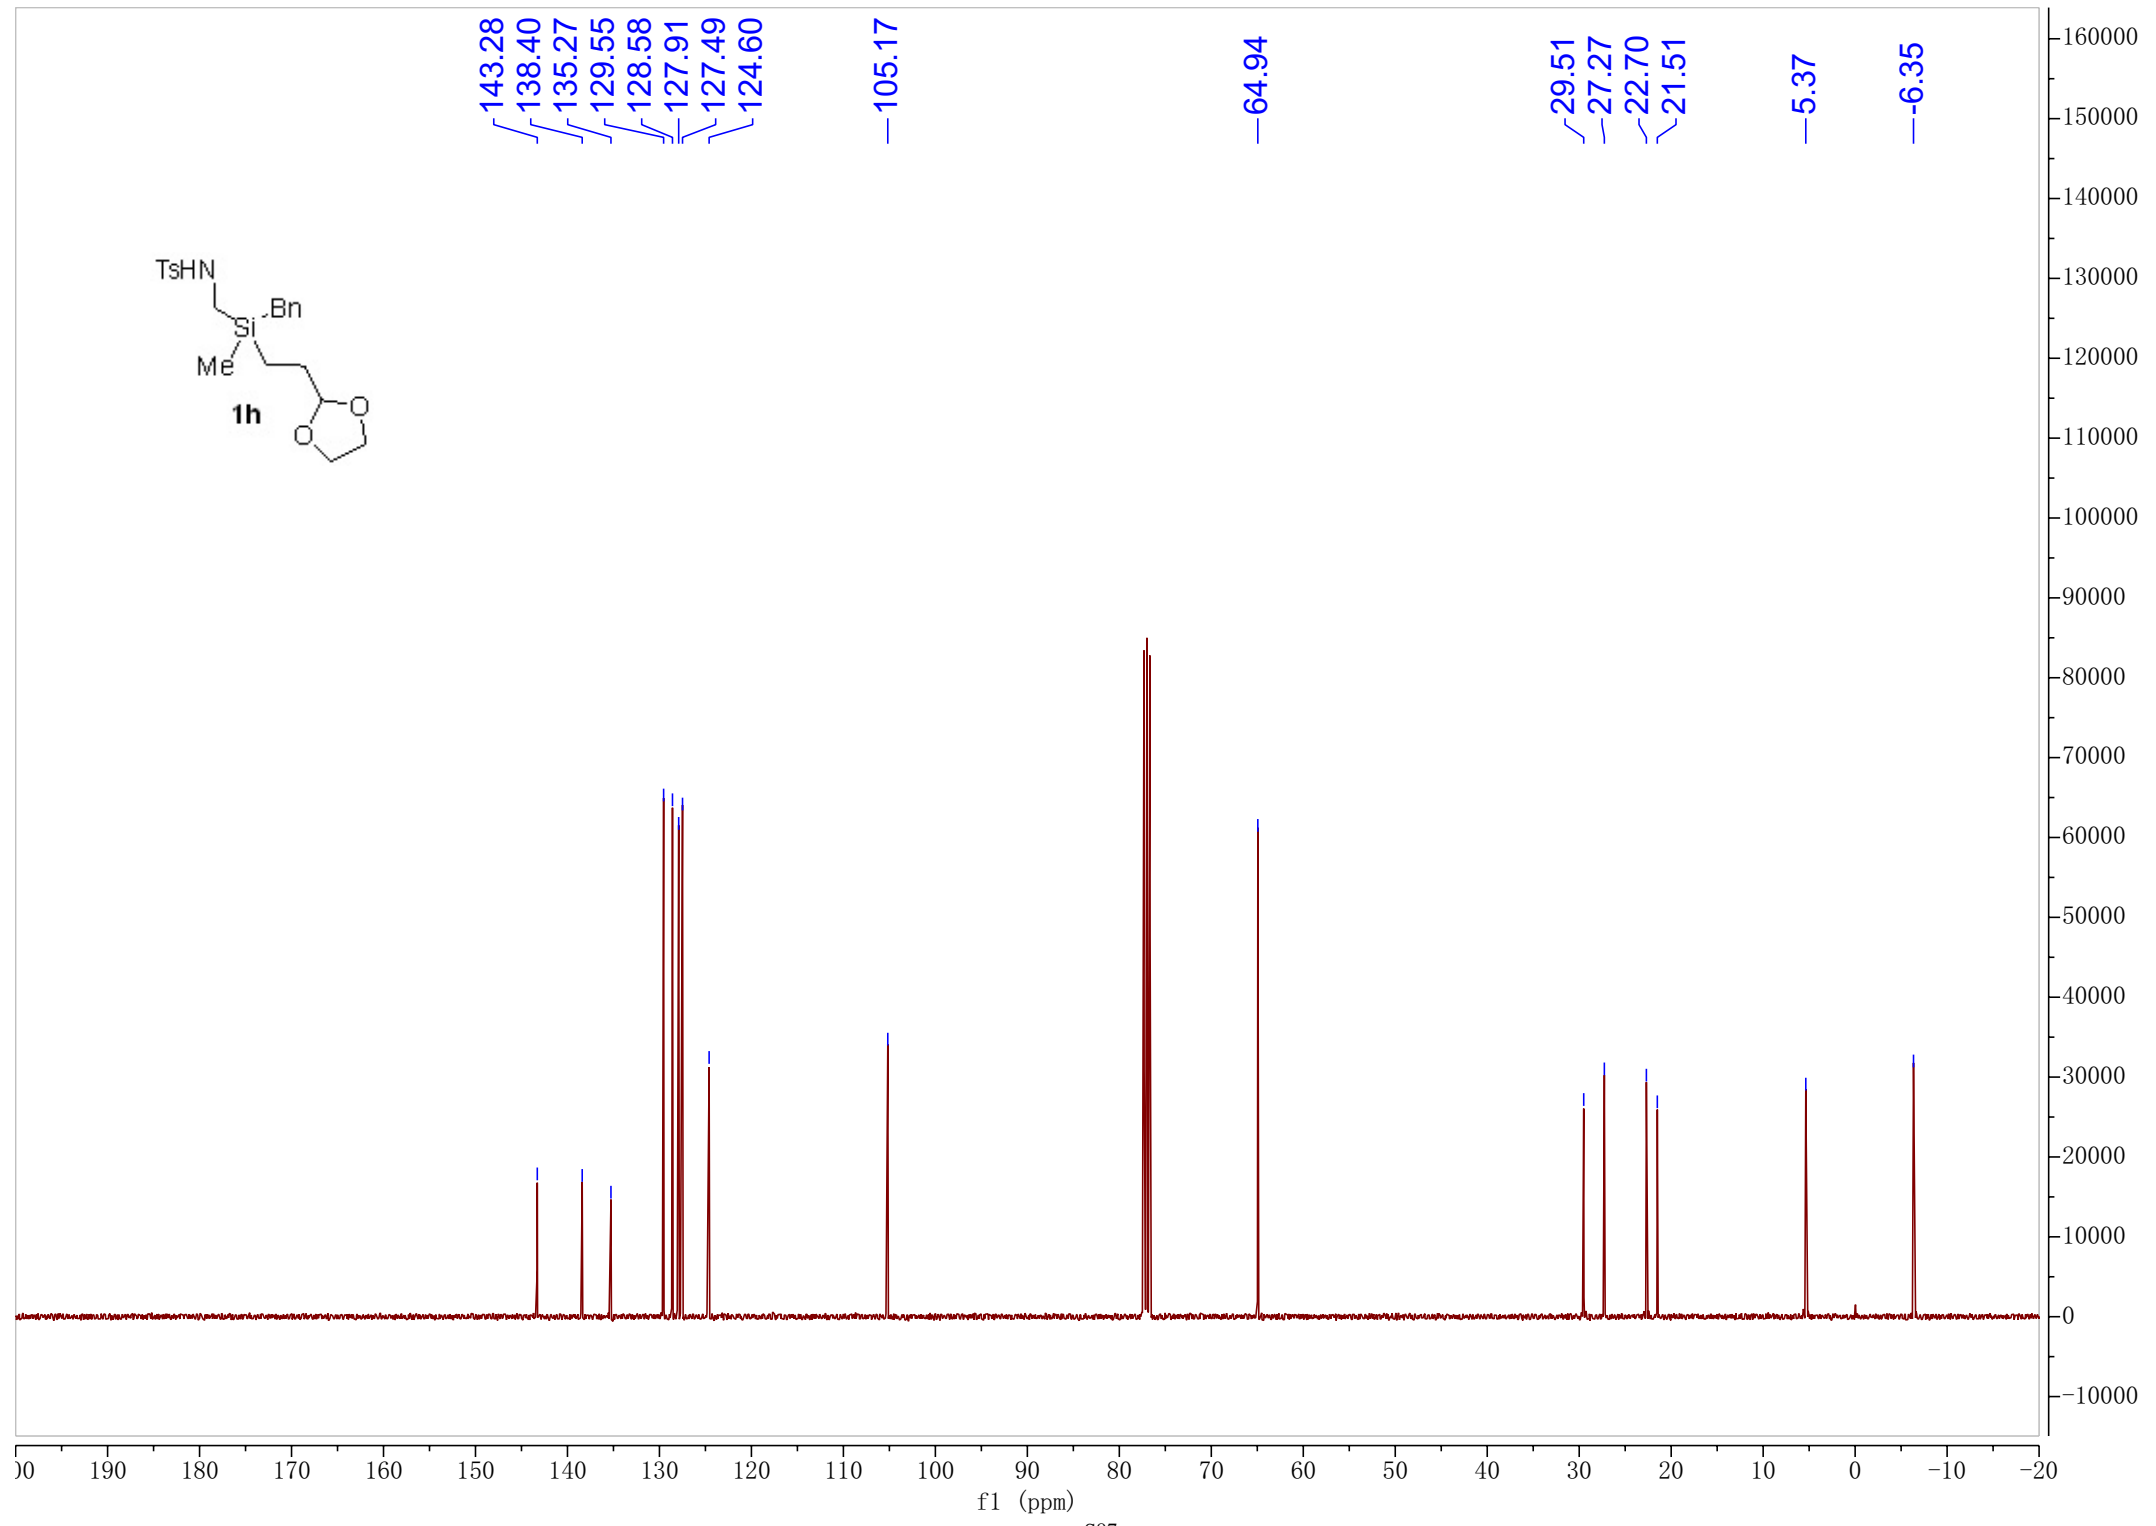

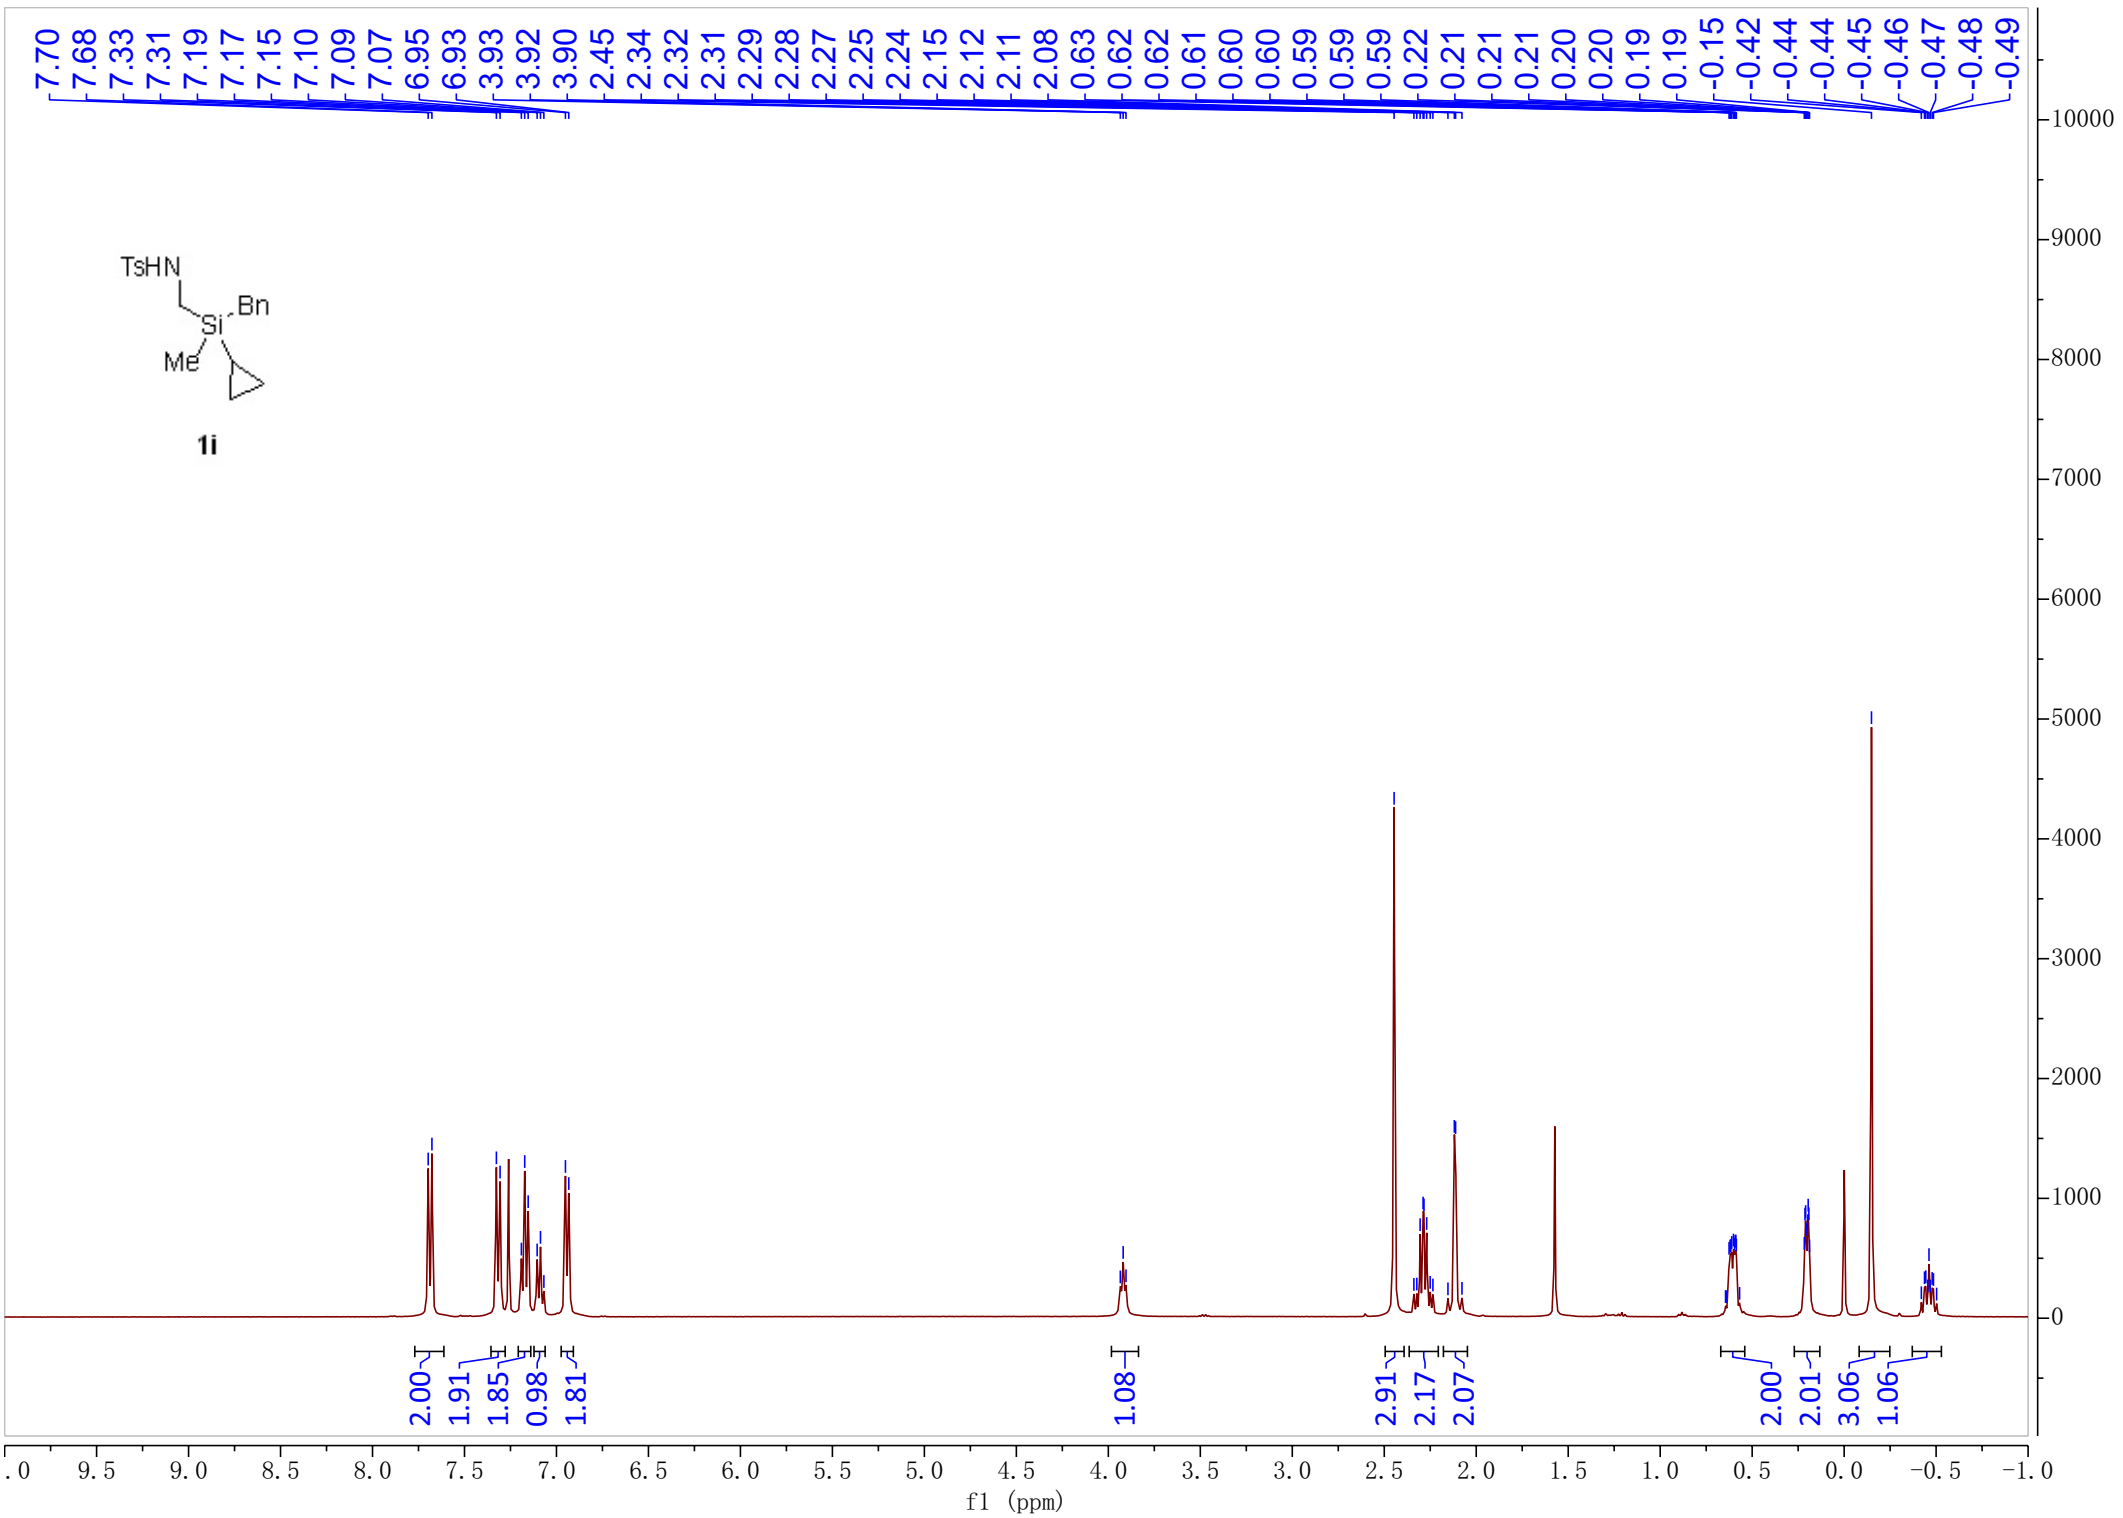





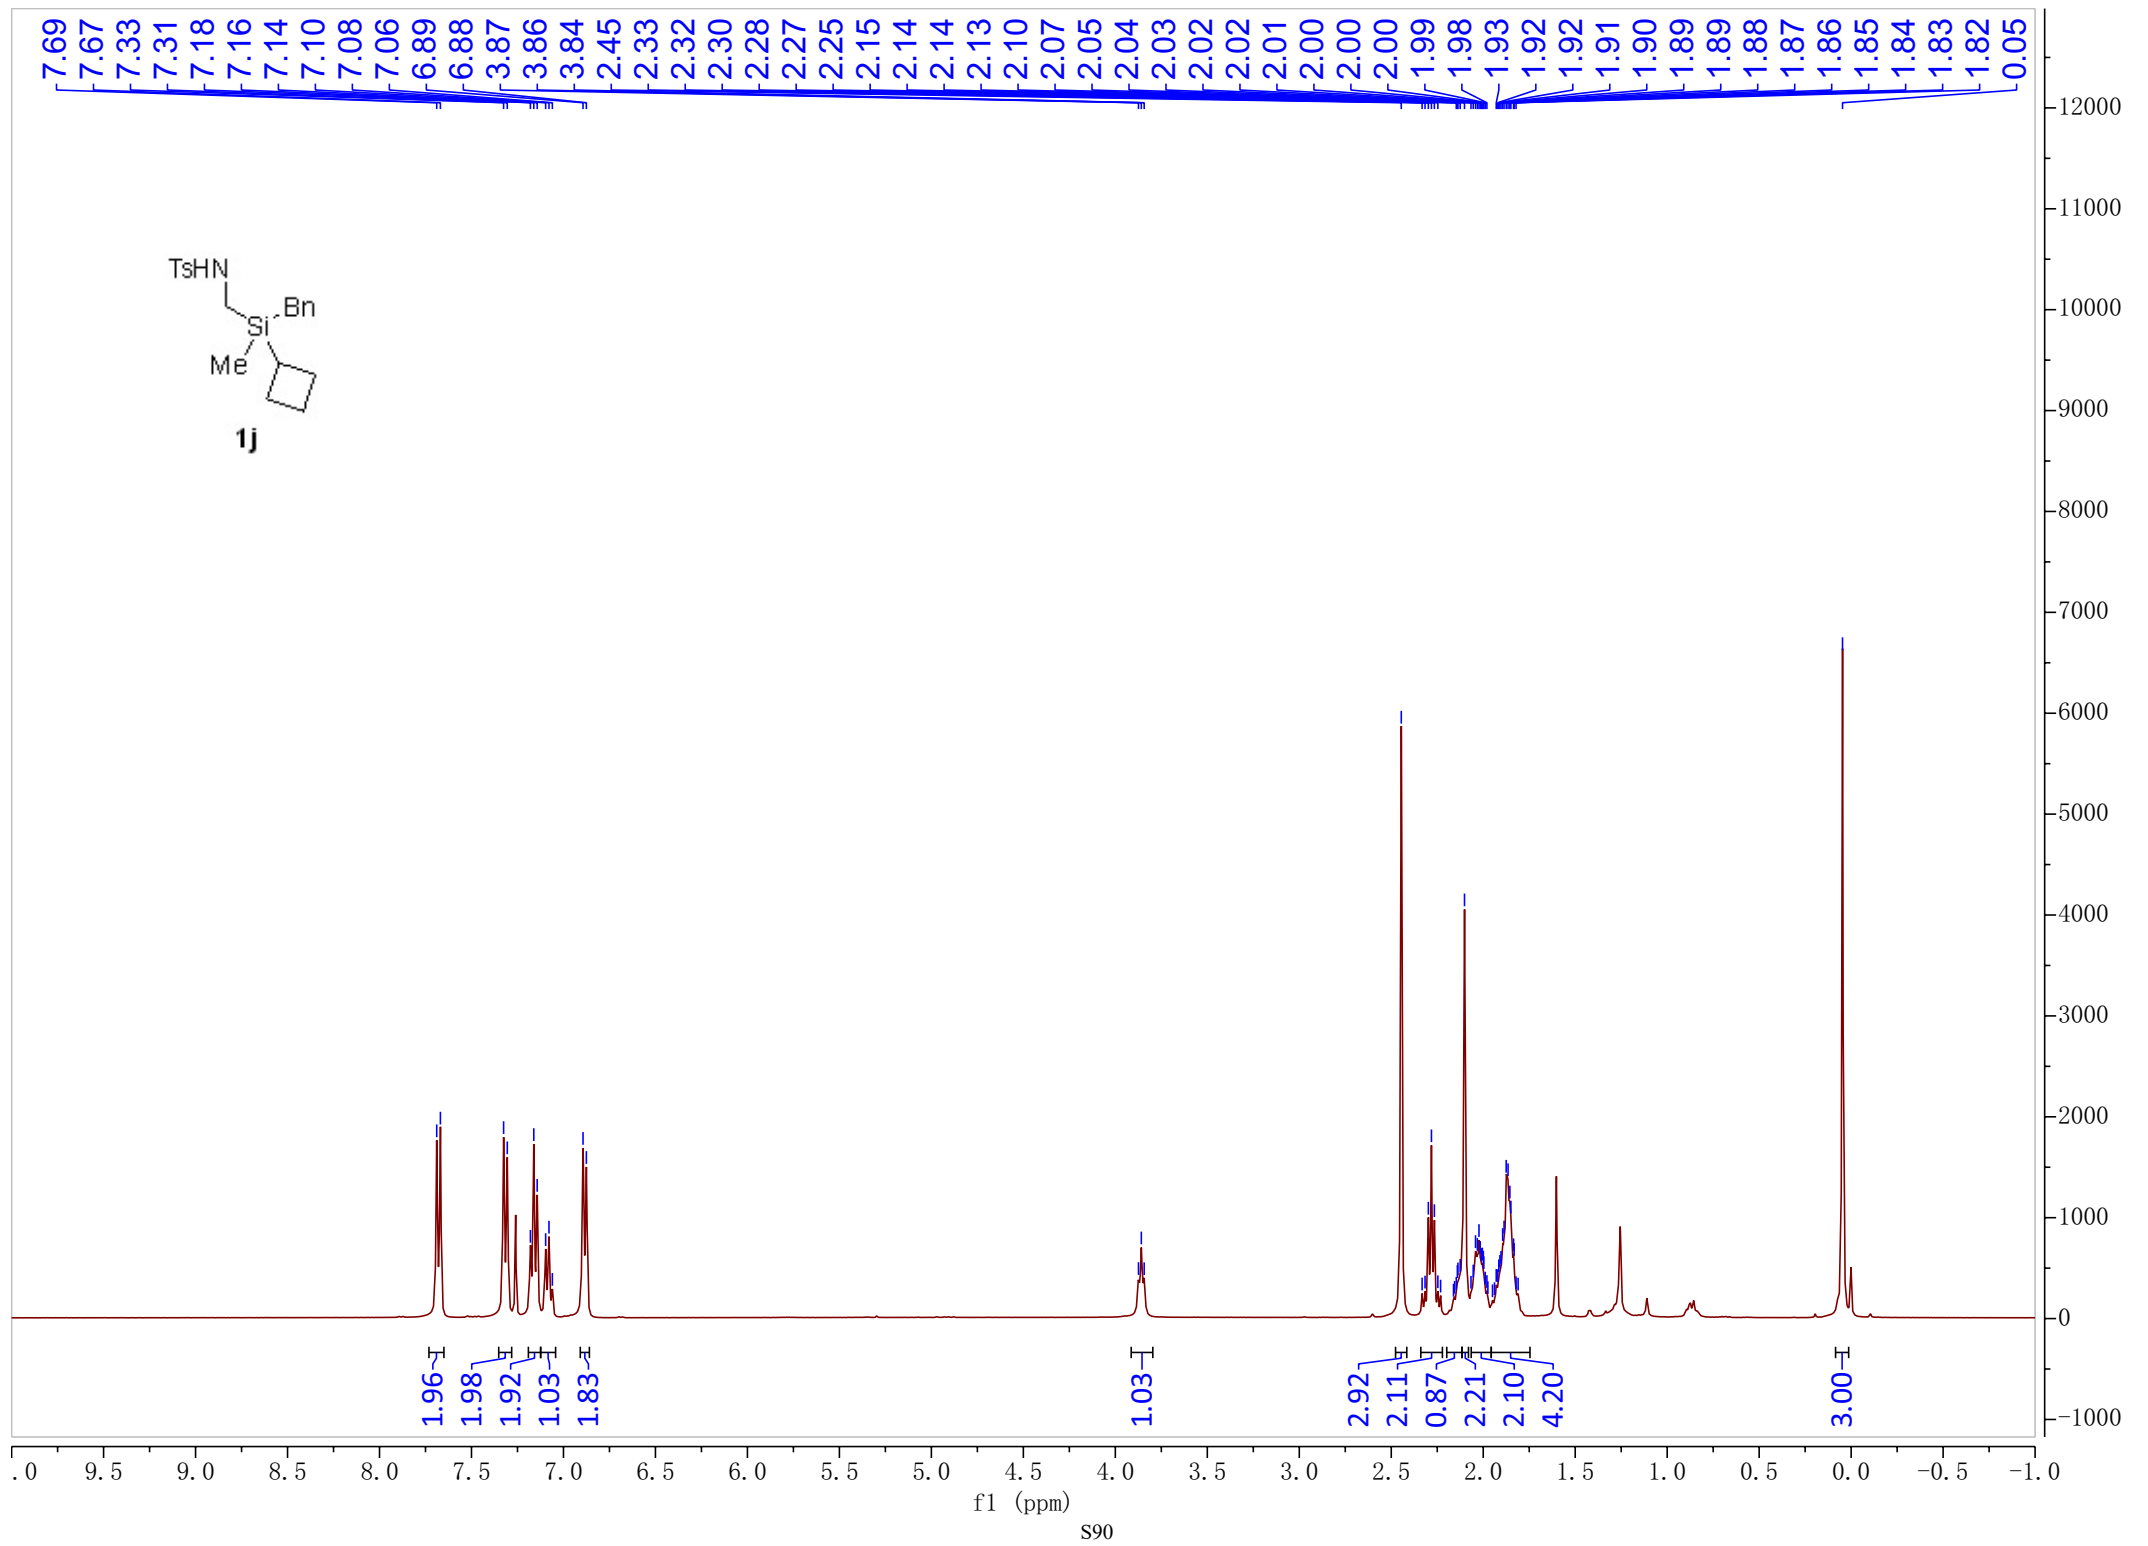

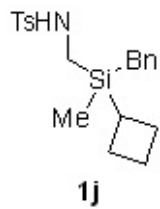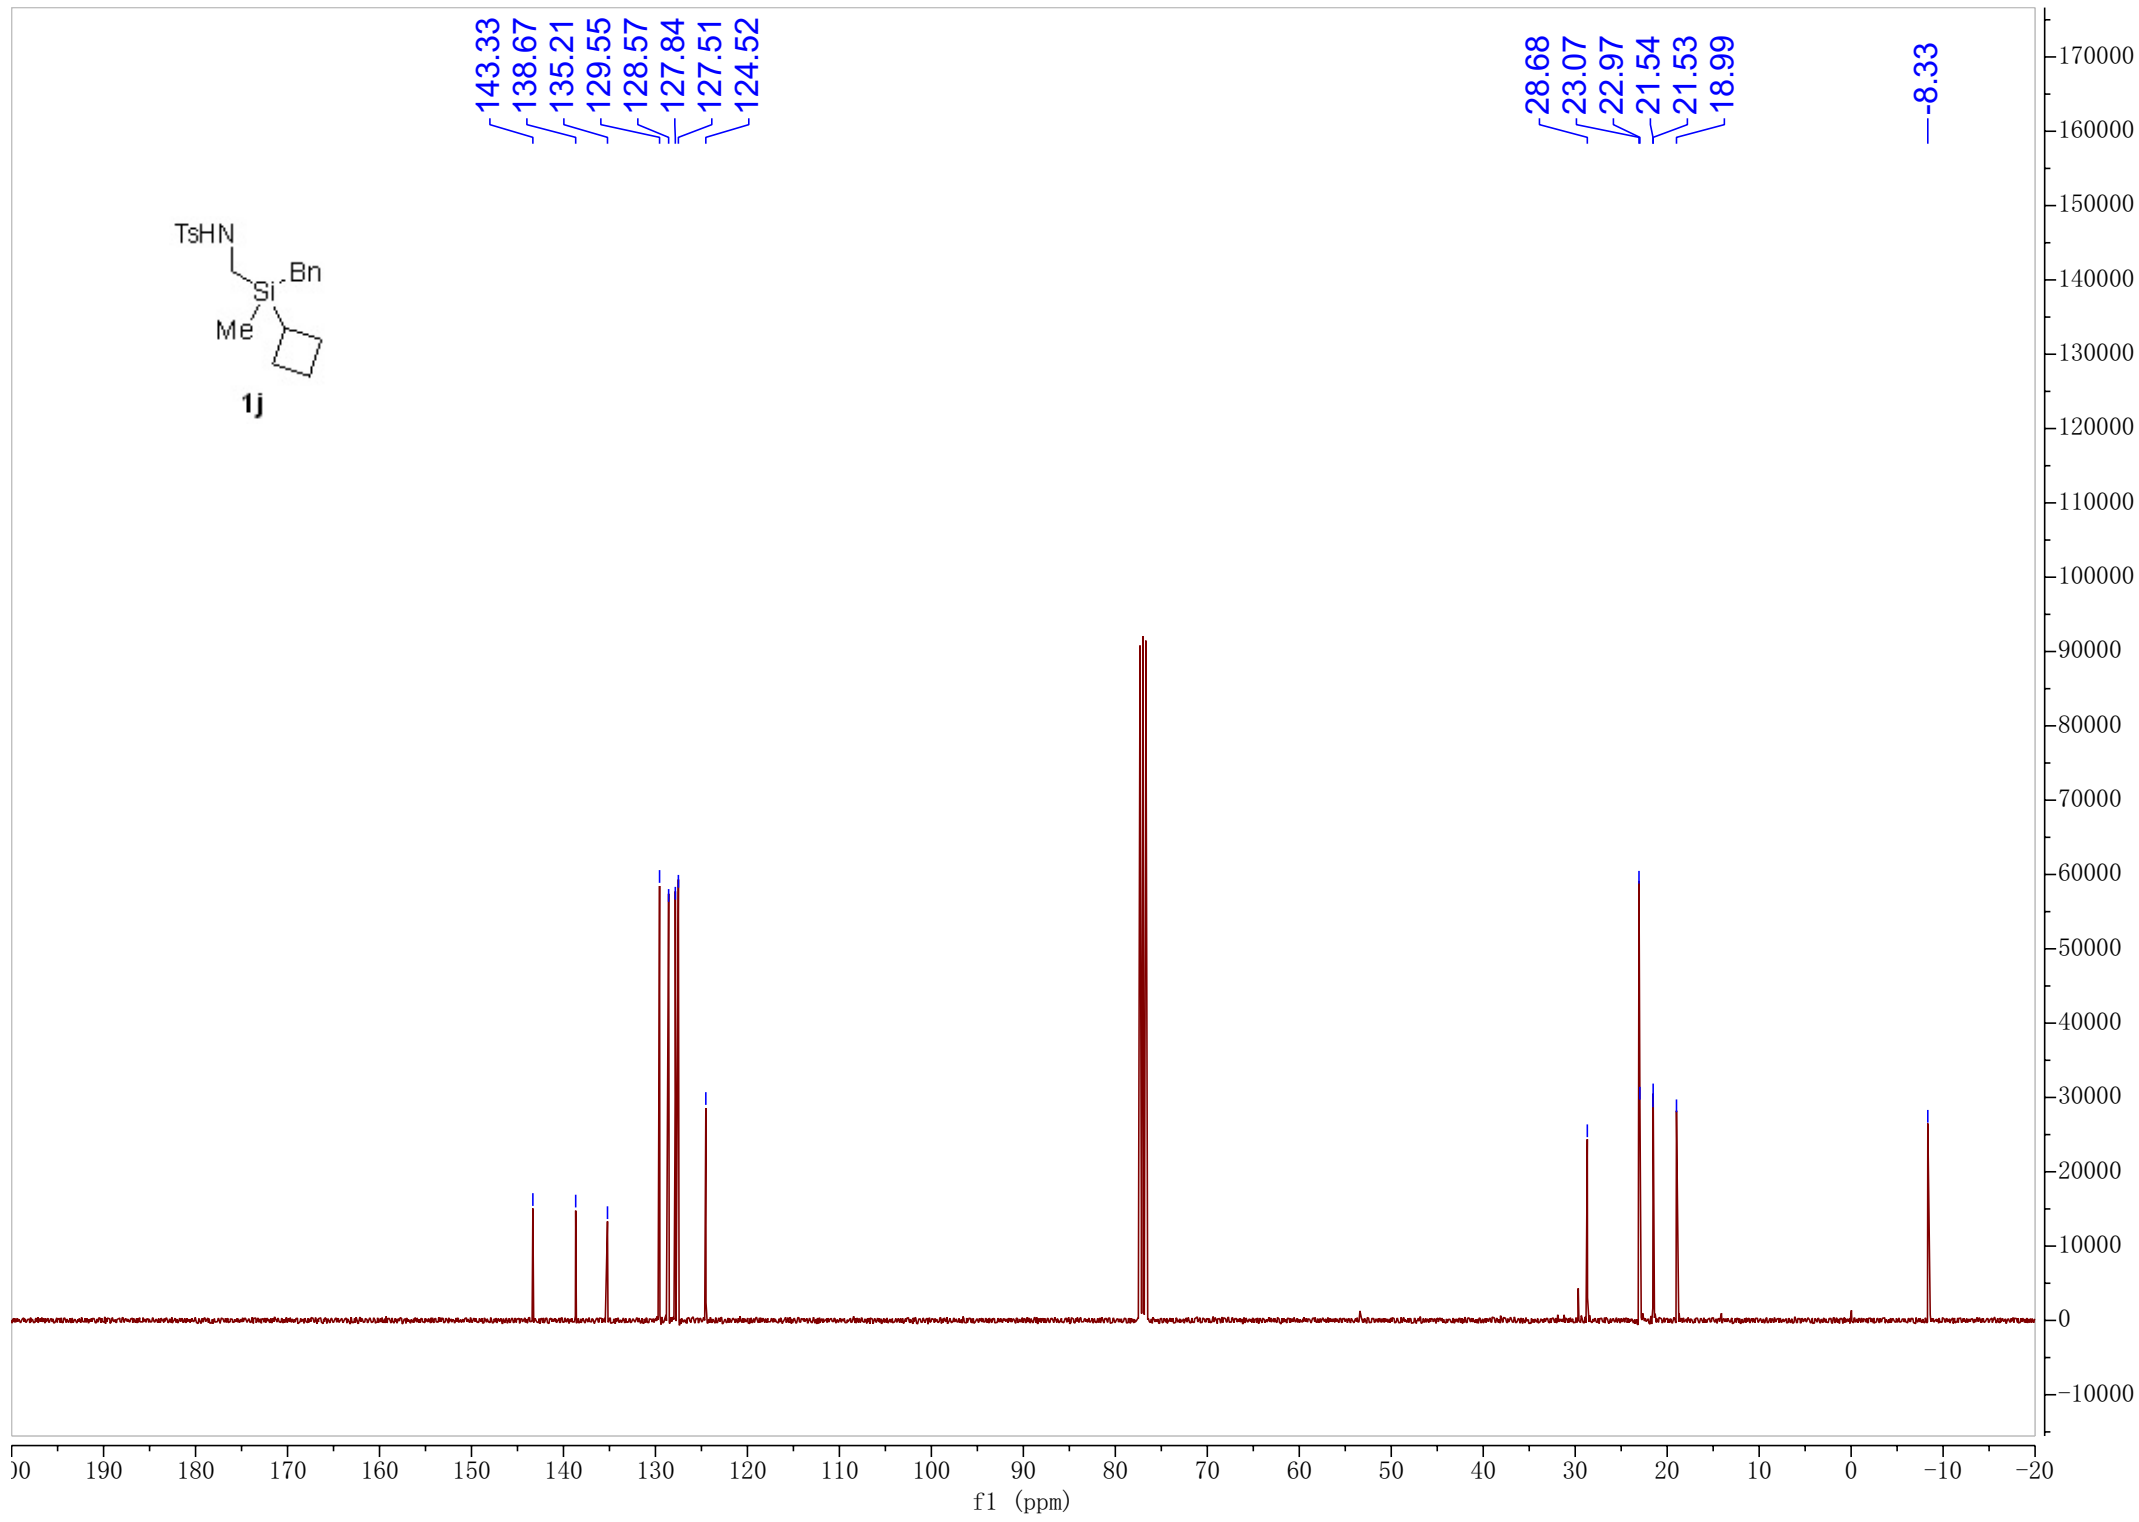

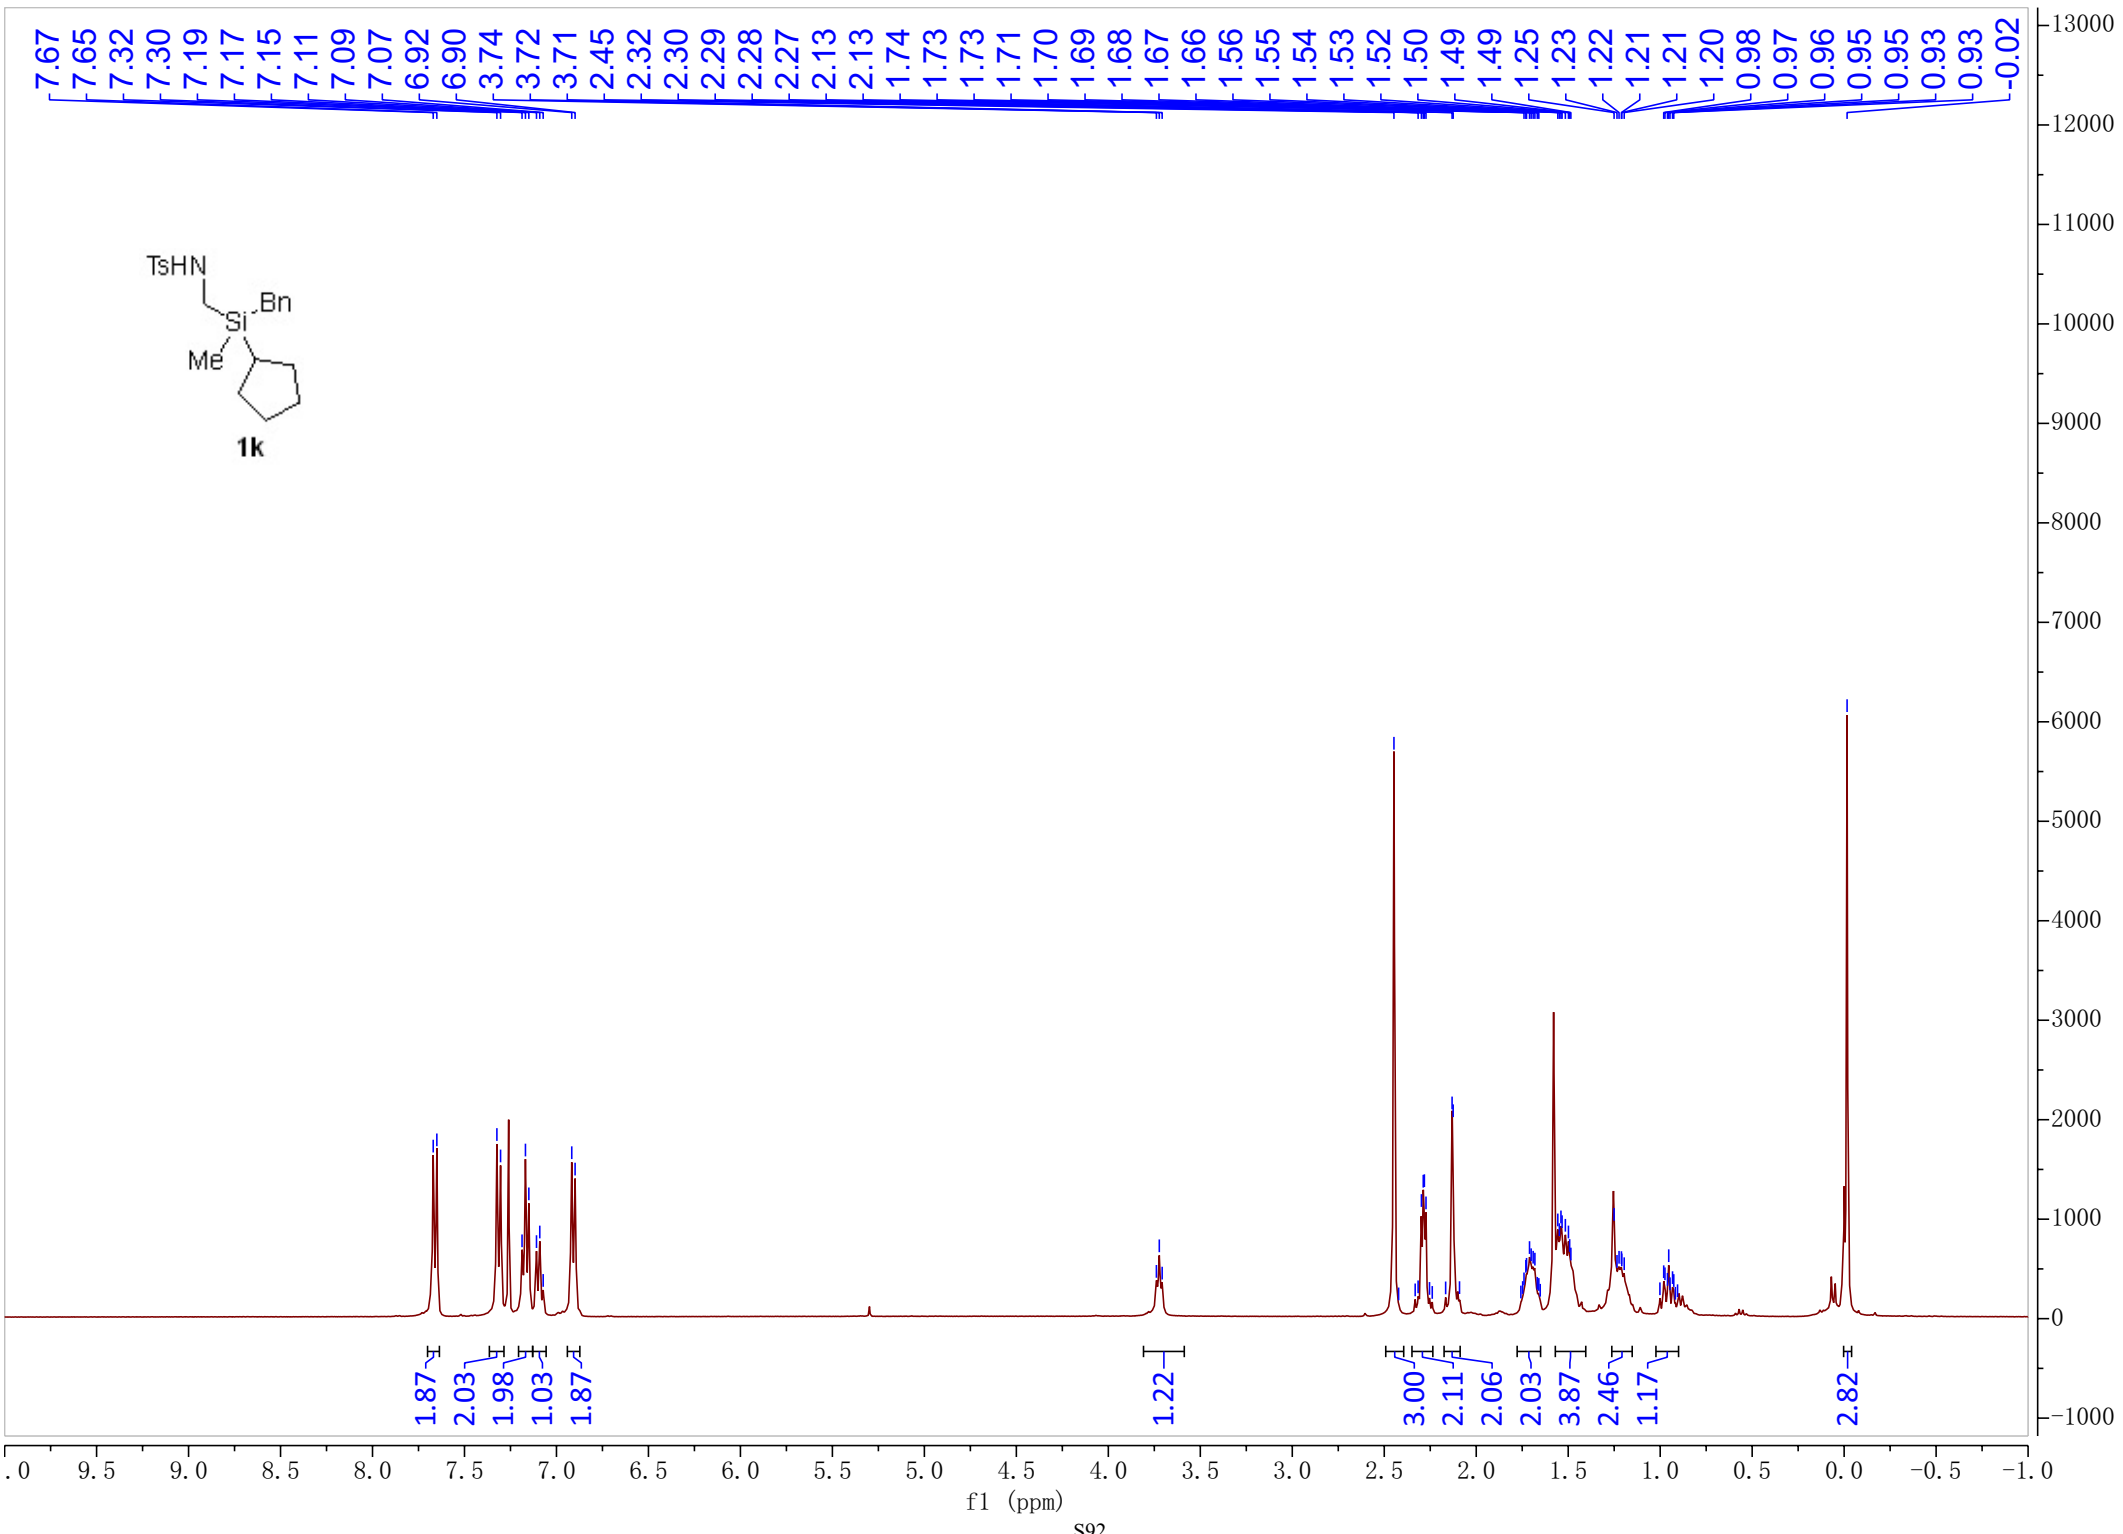

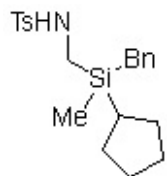

**1k**

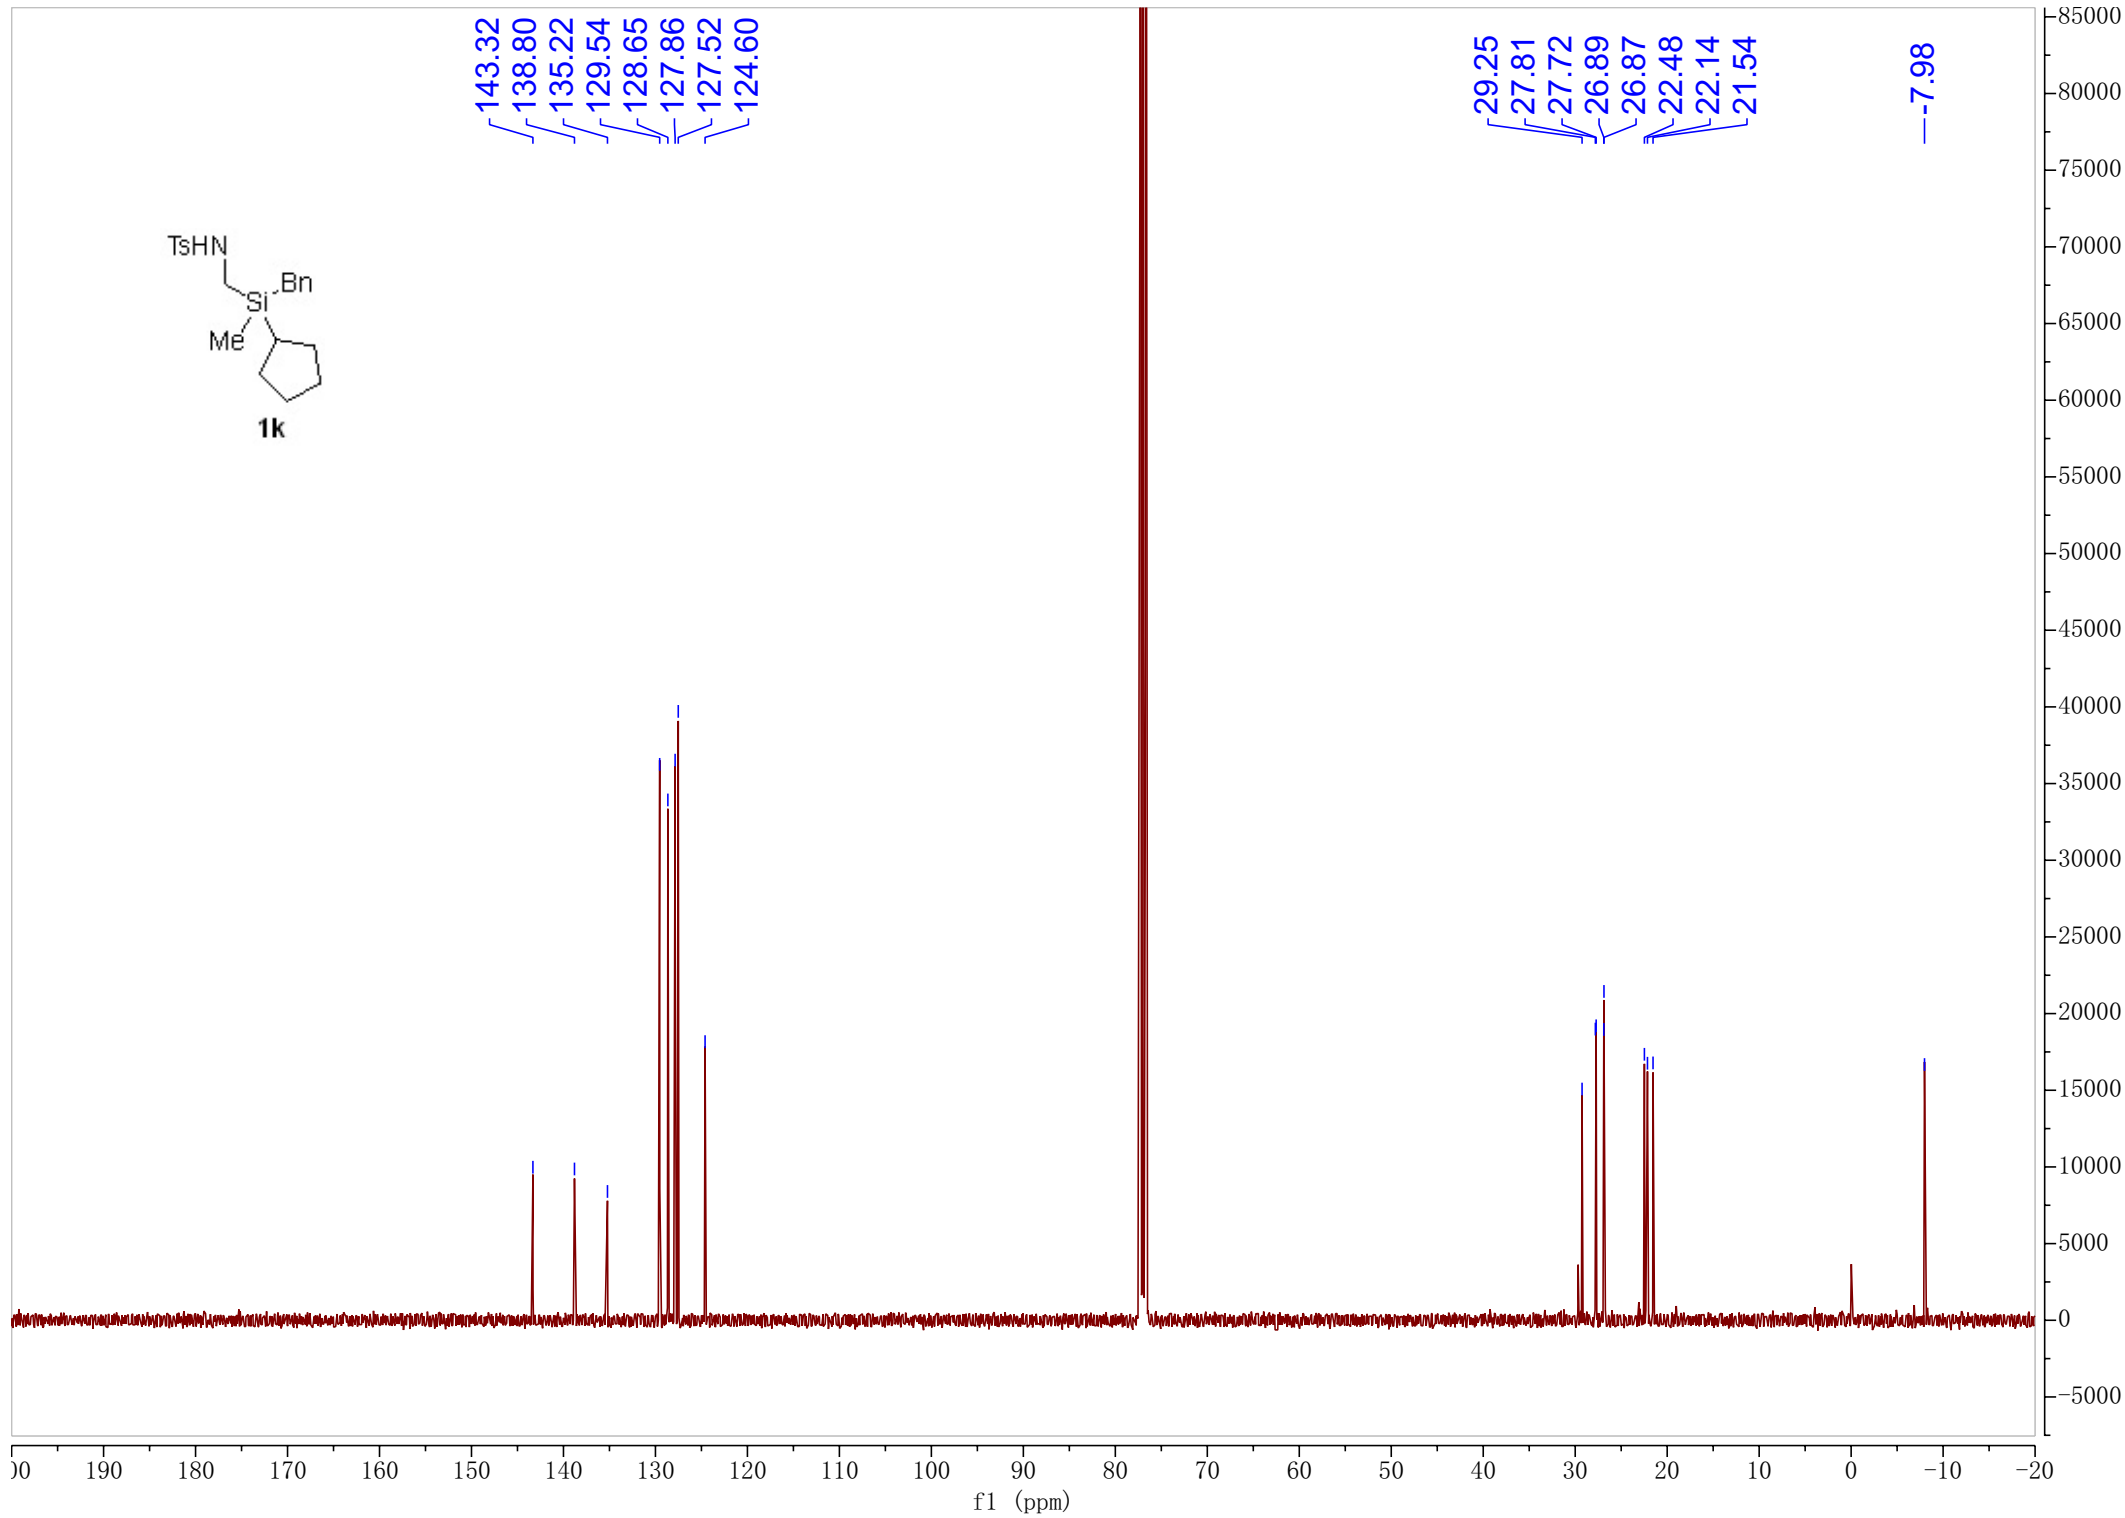

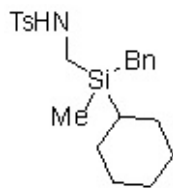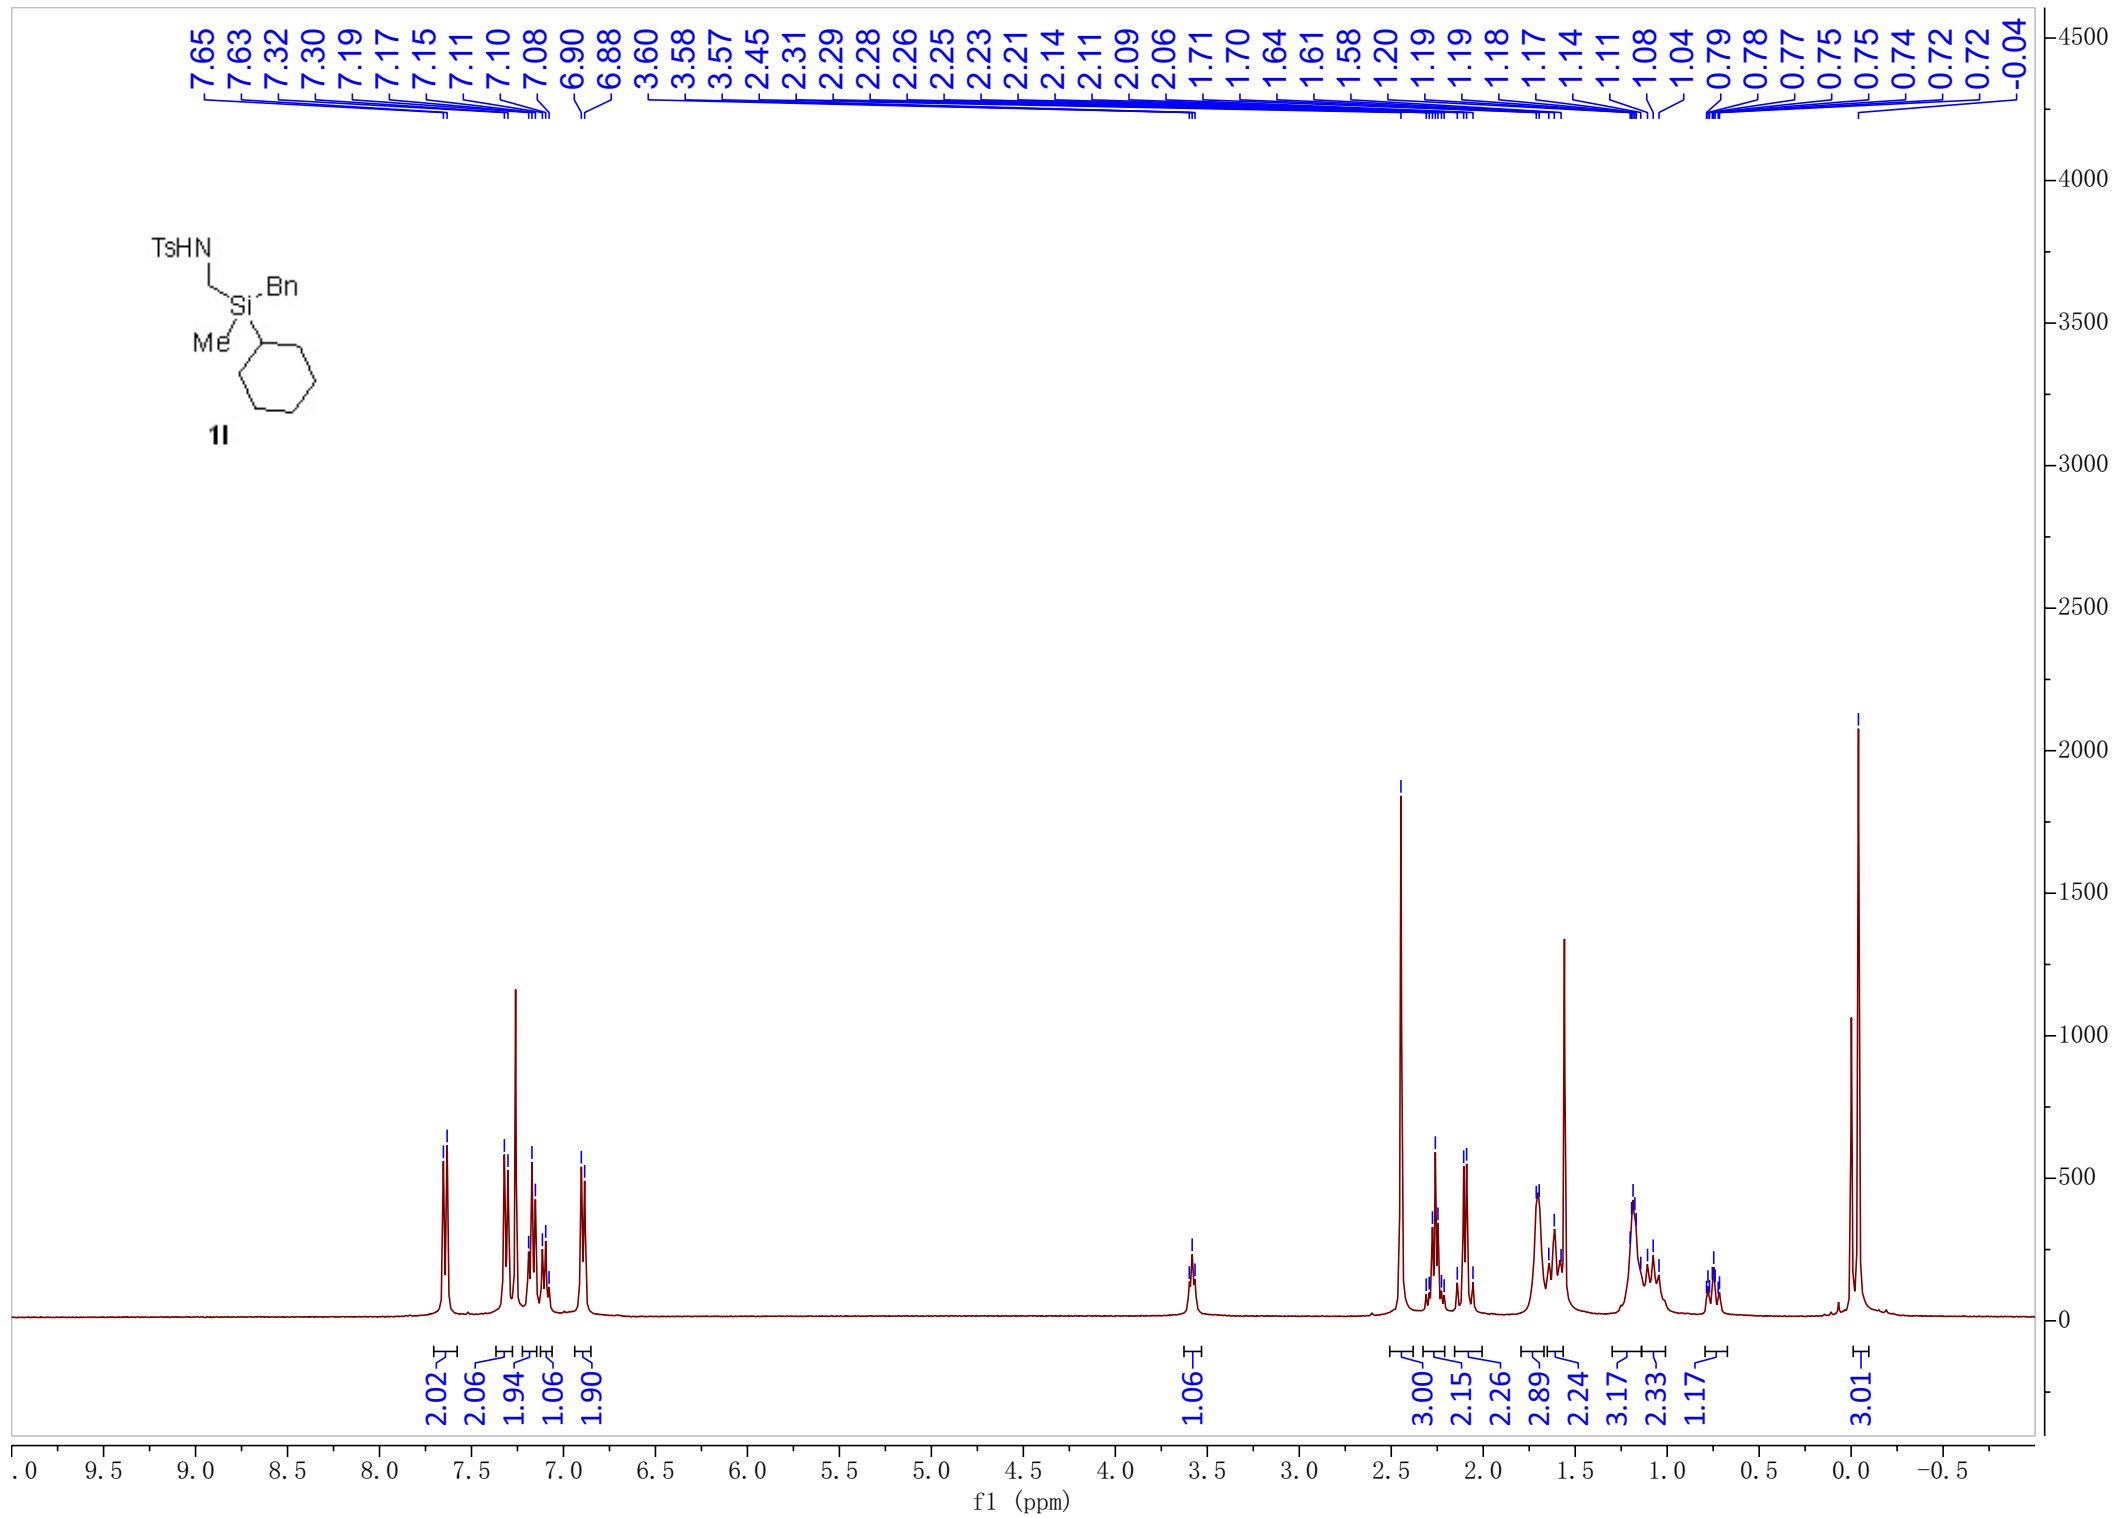

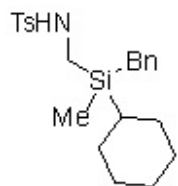

**II**

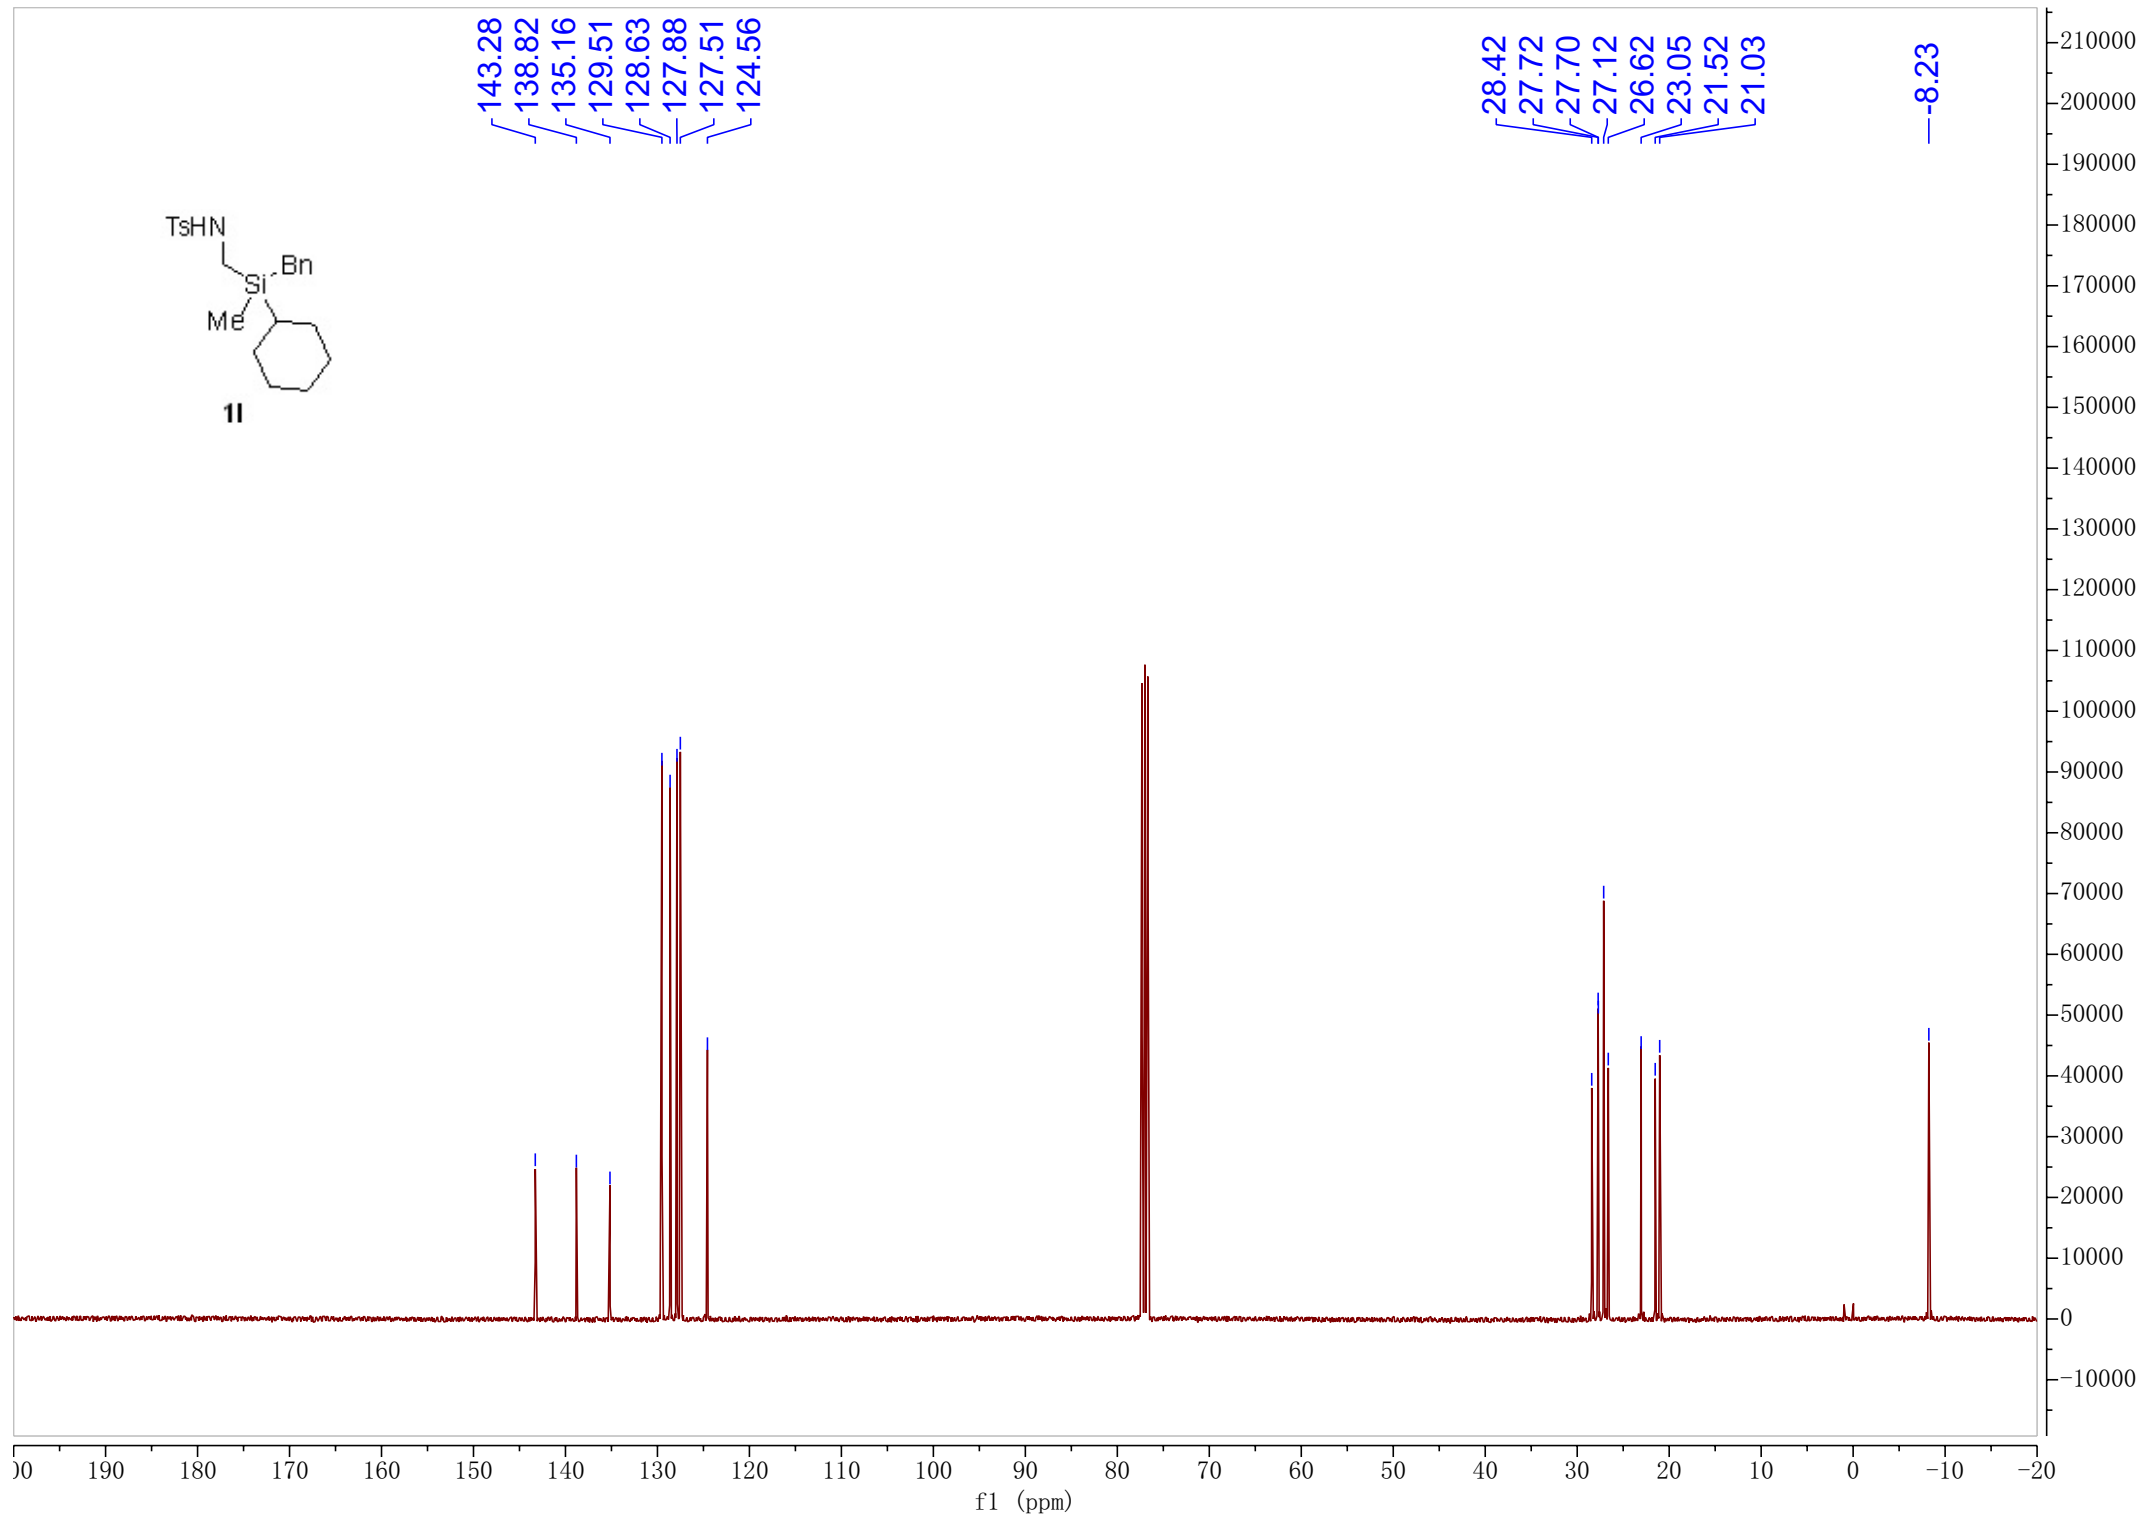

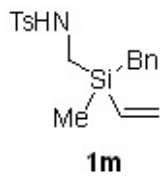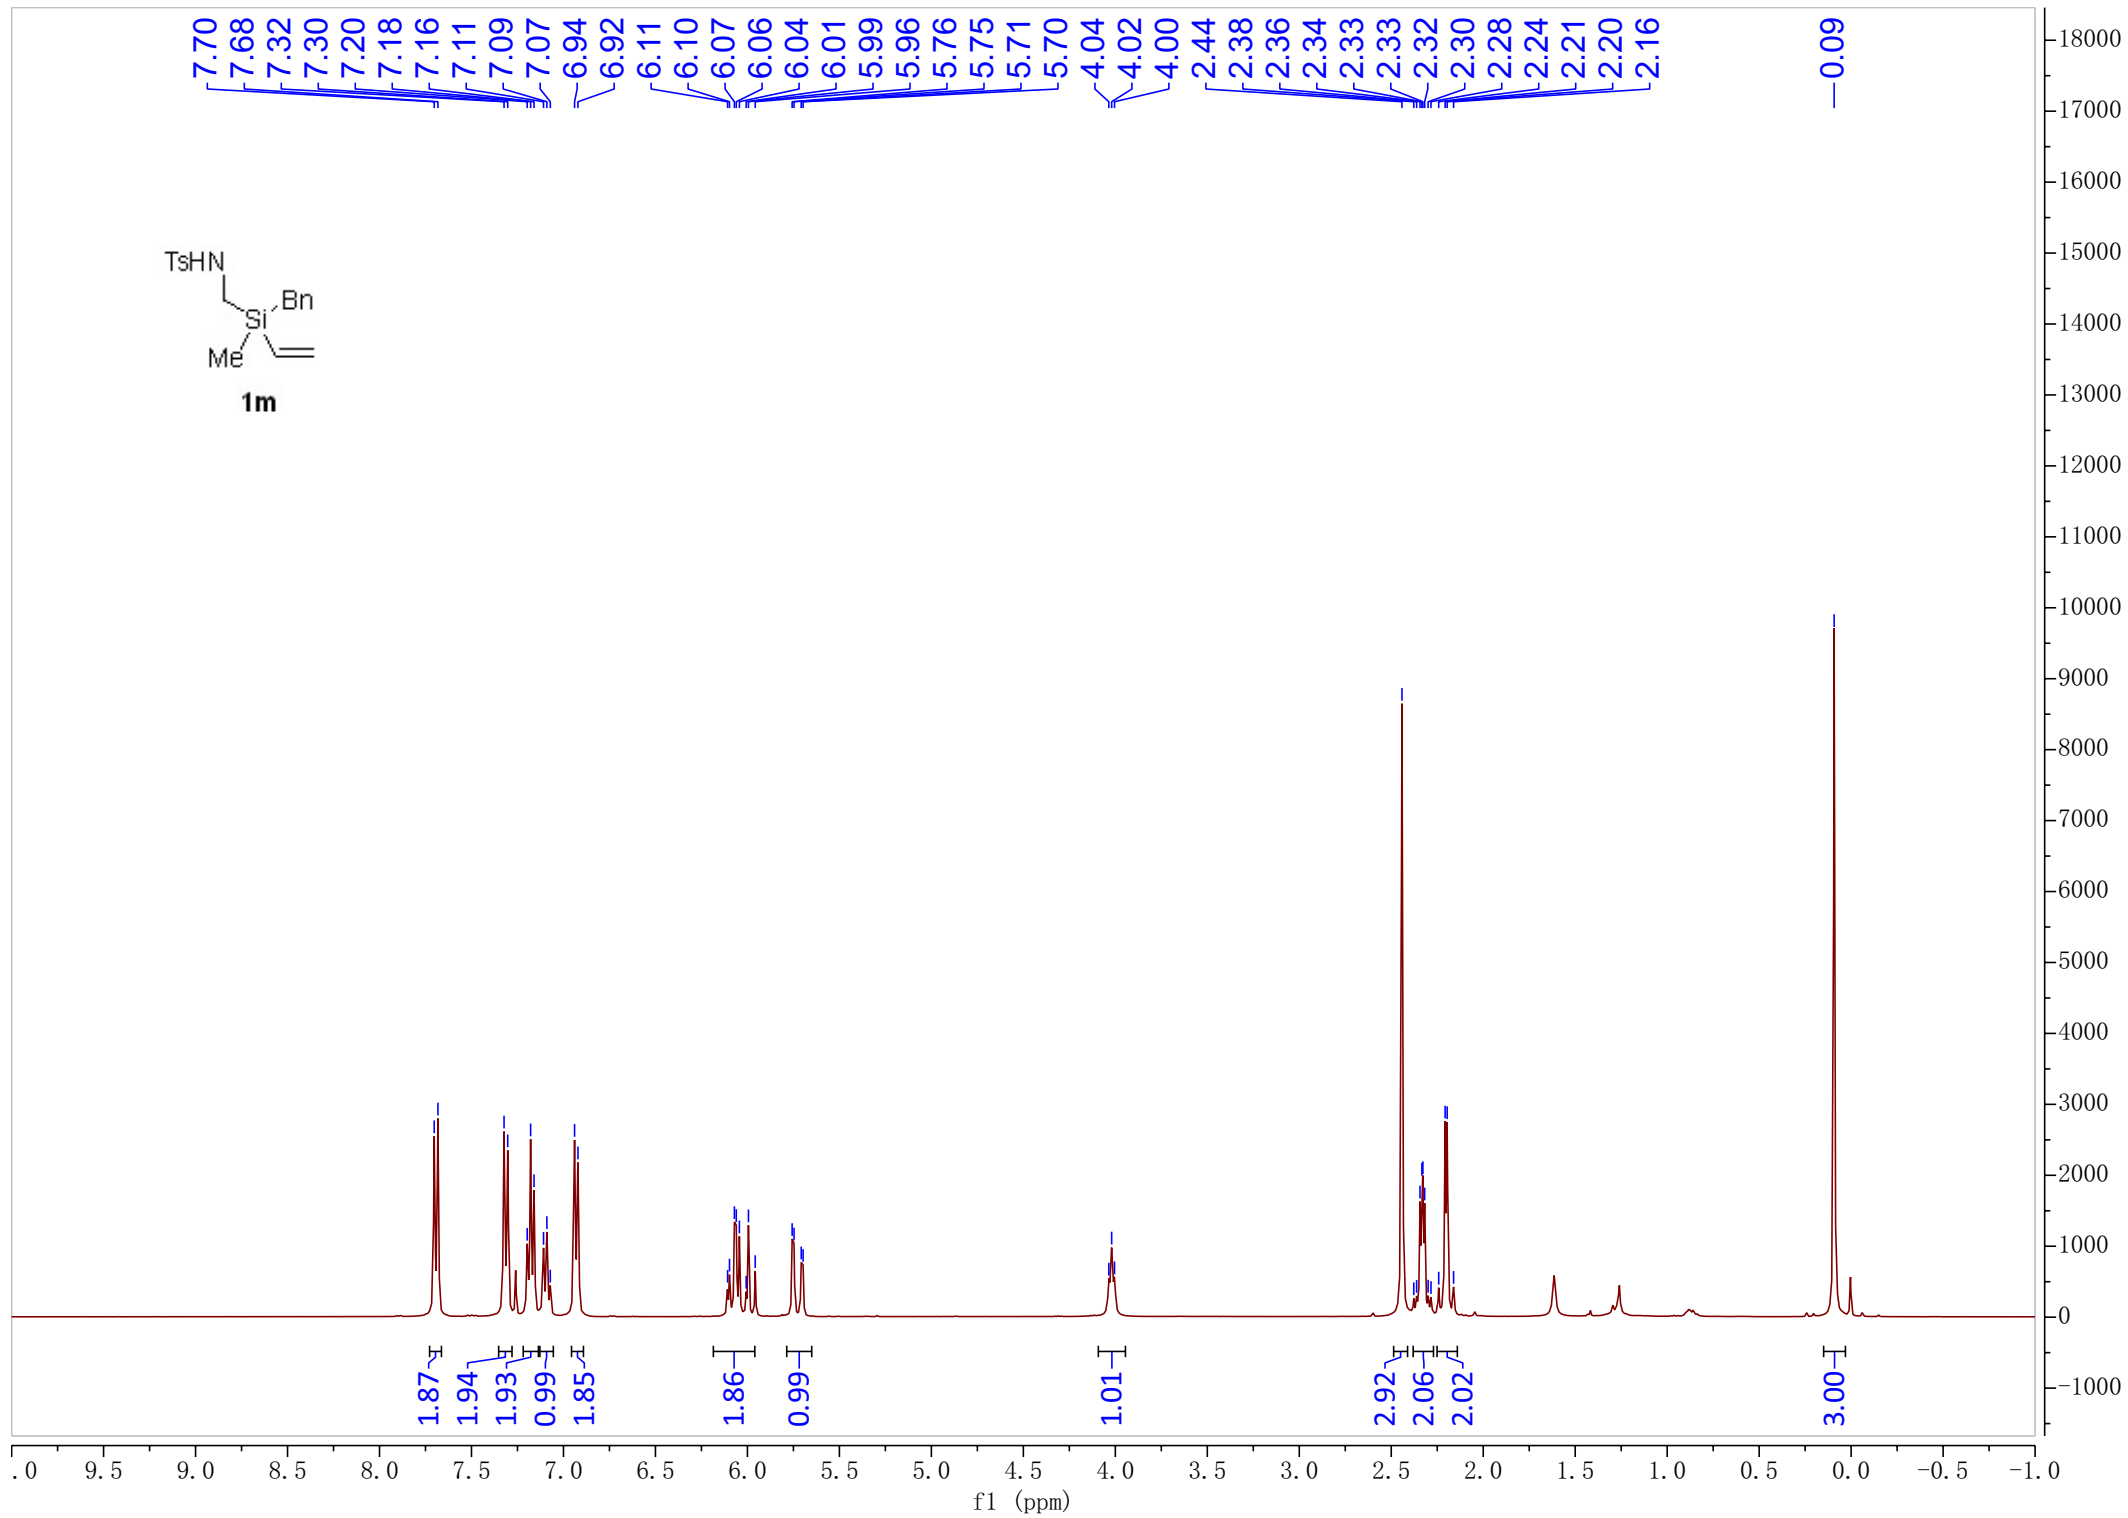



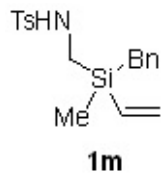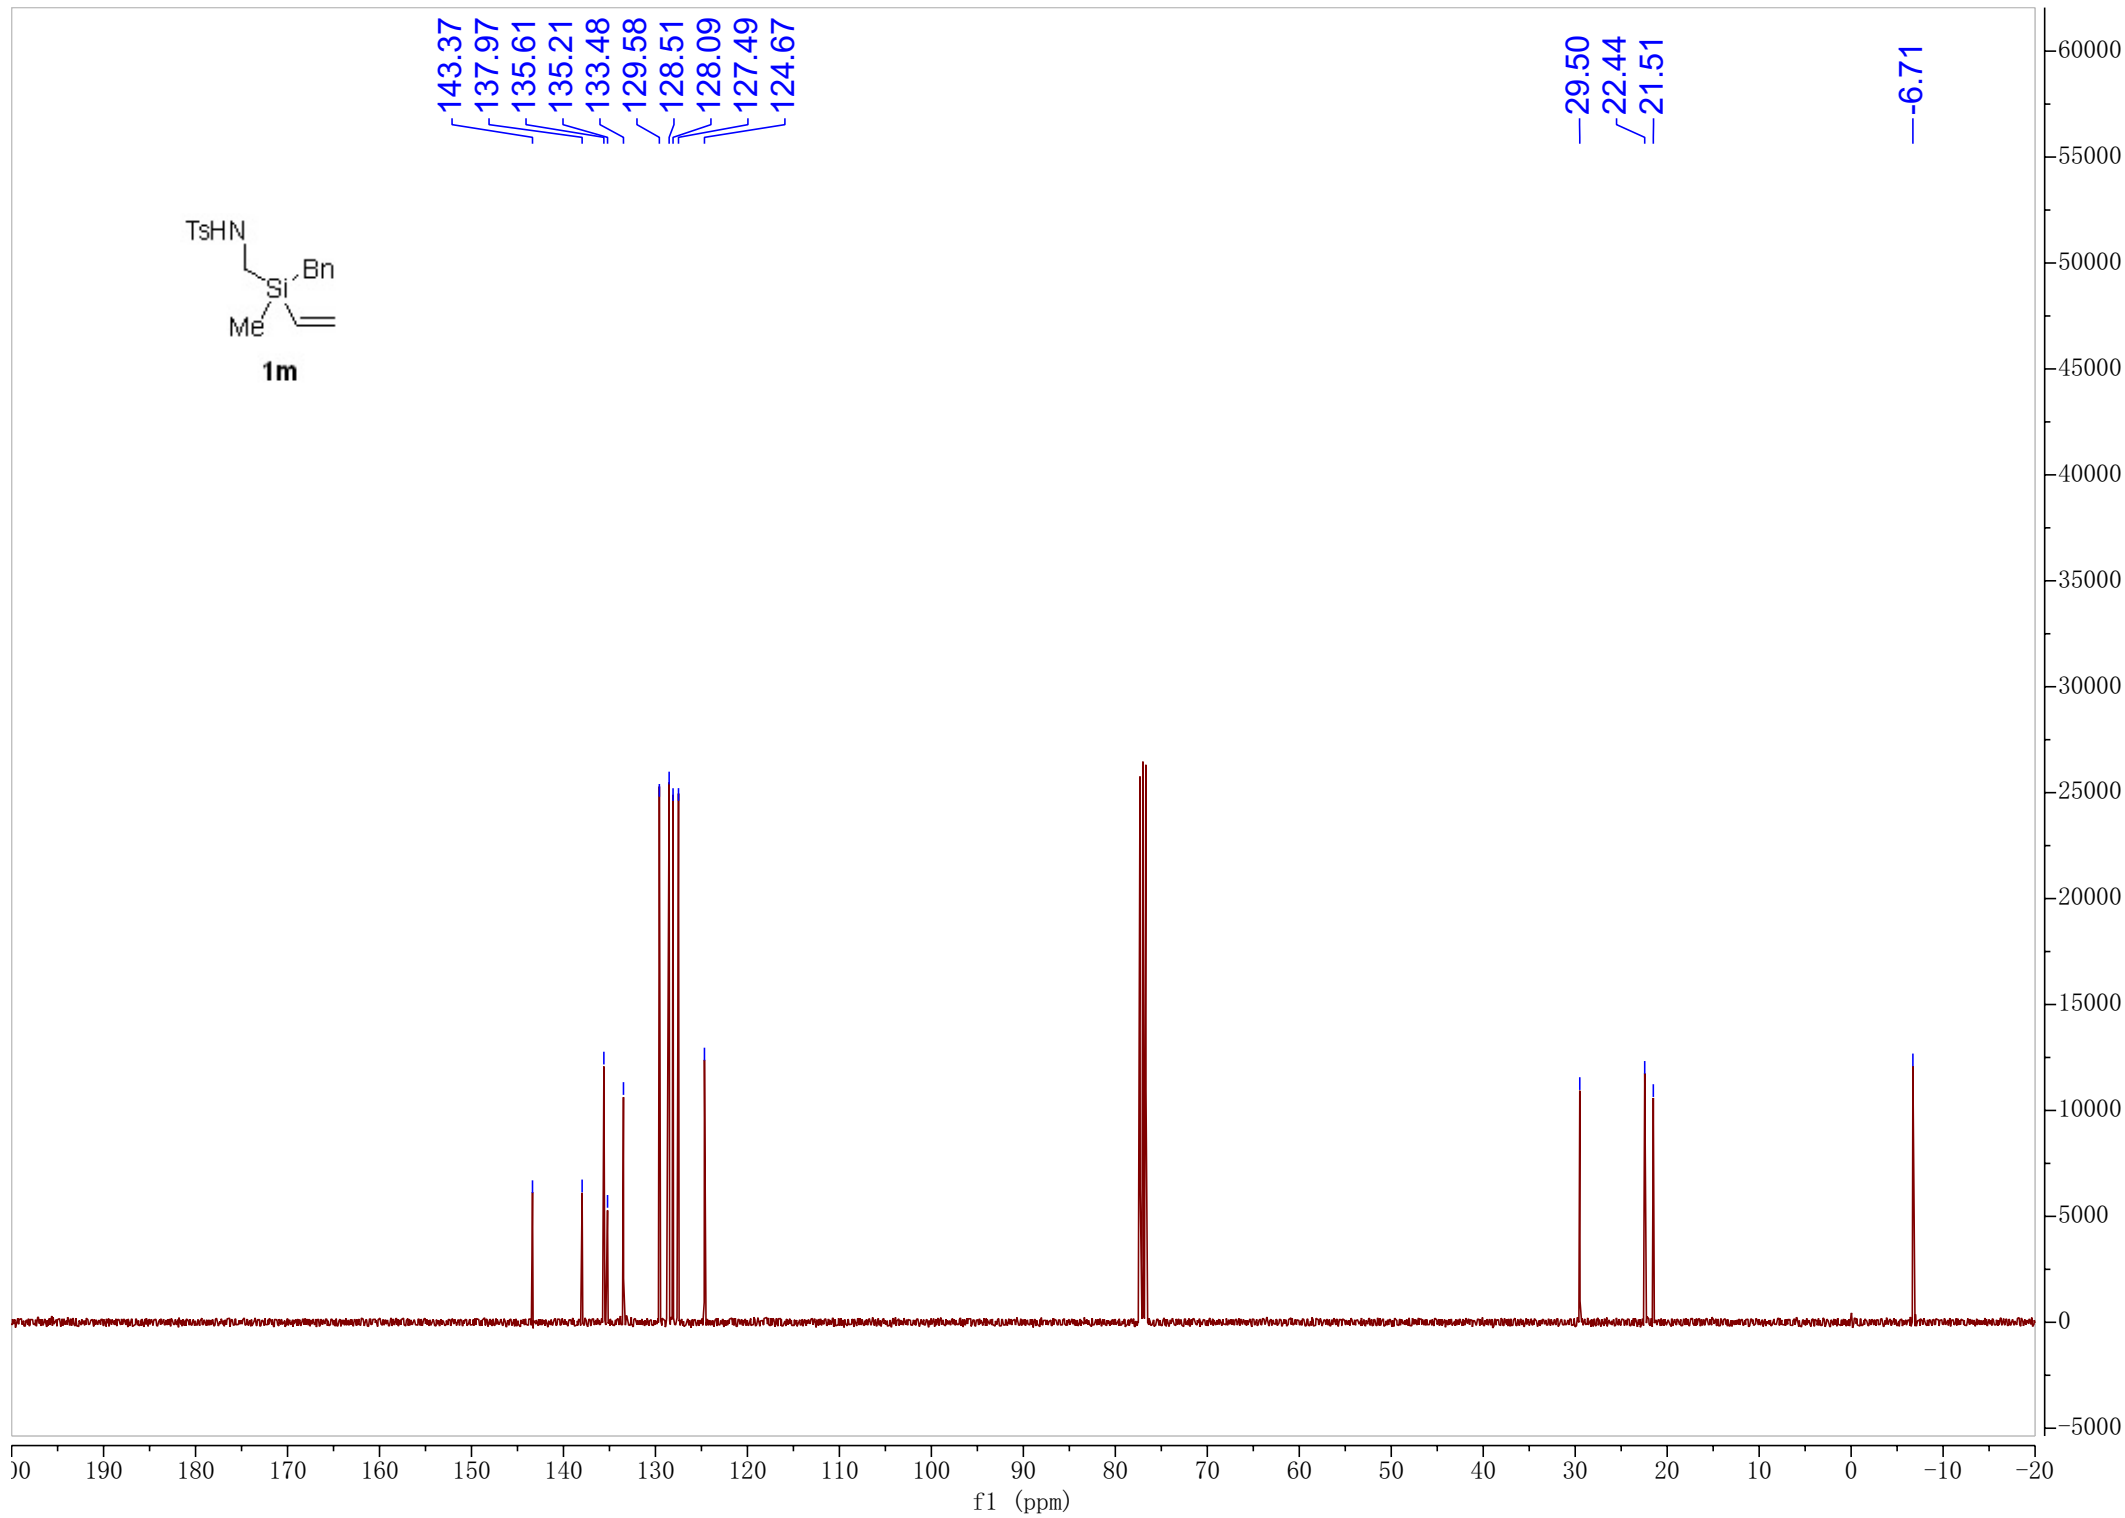

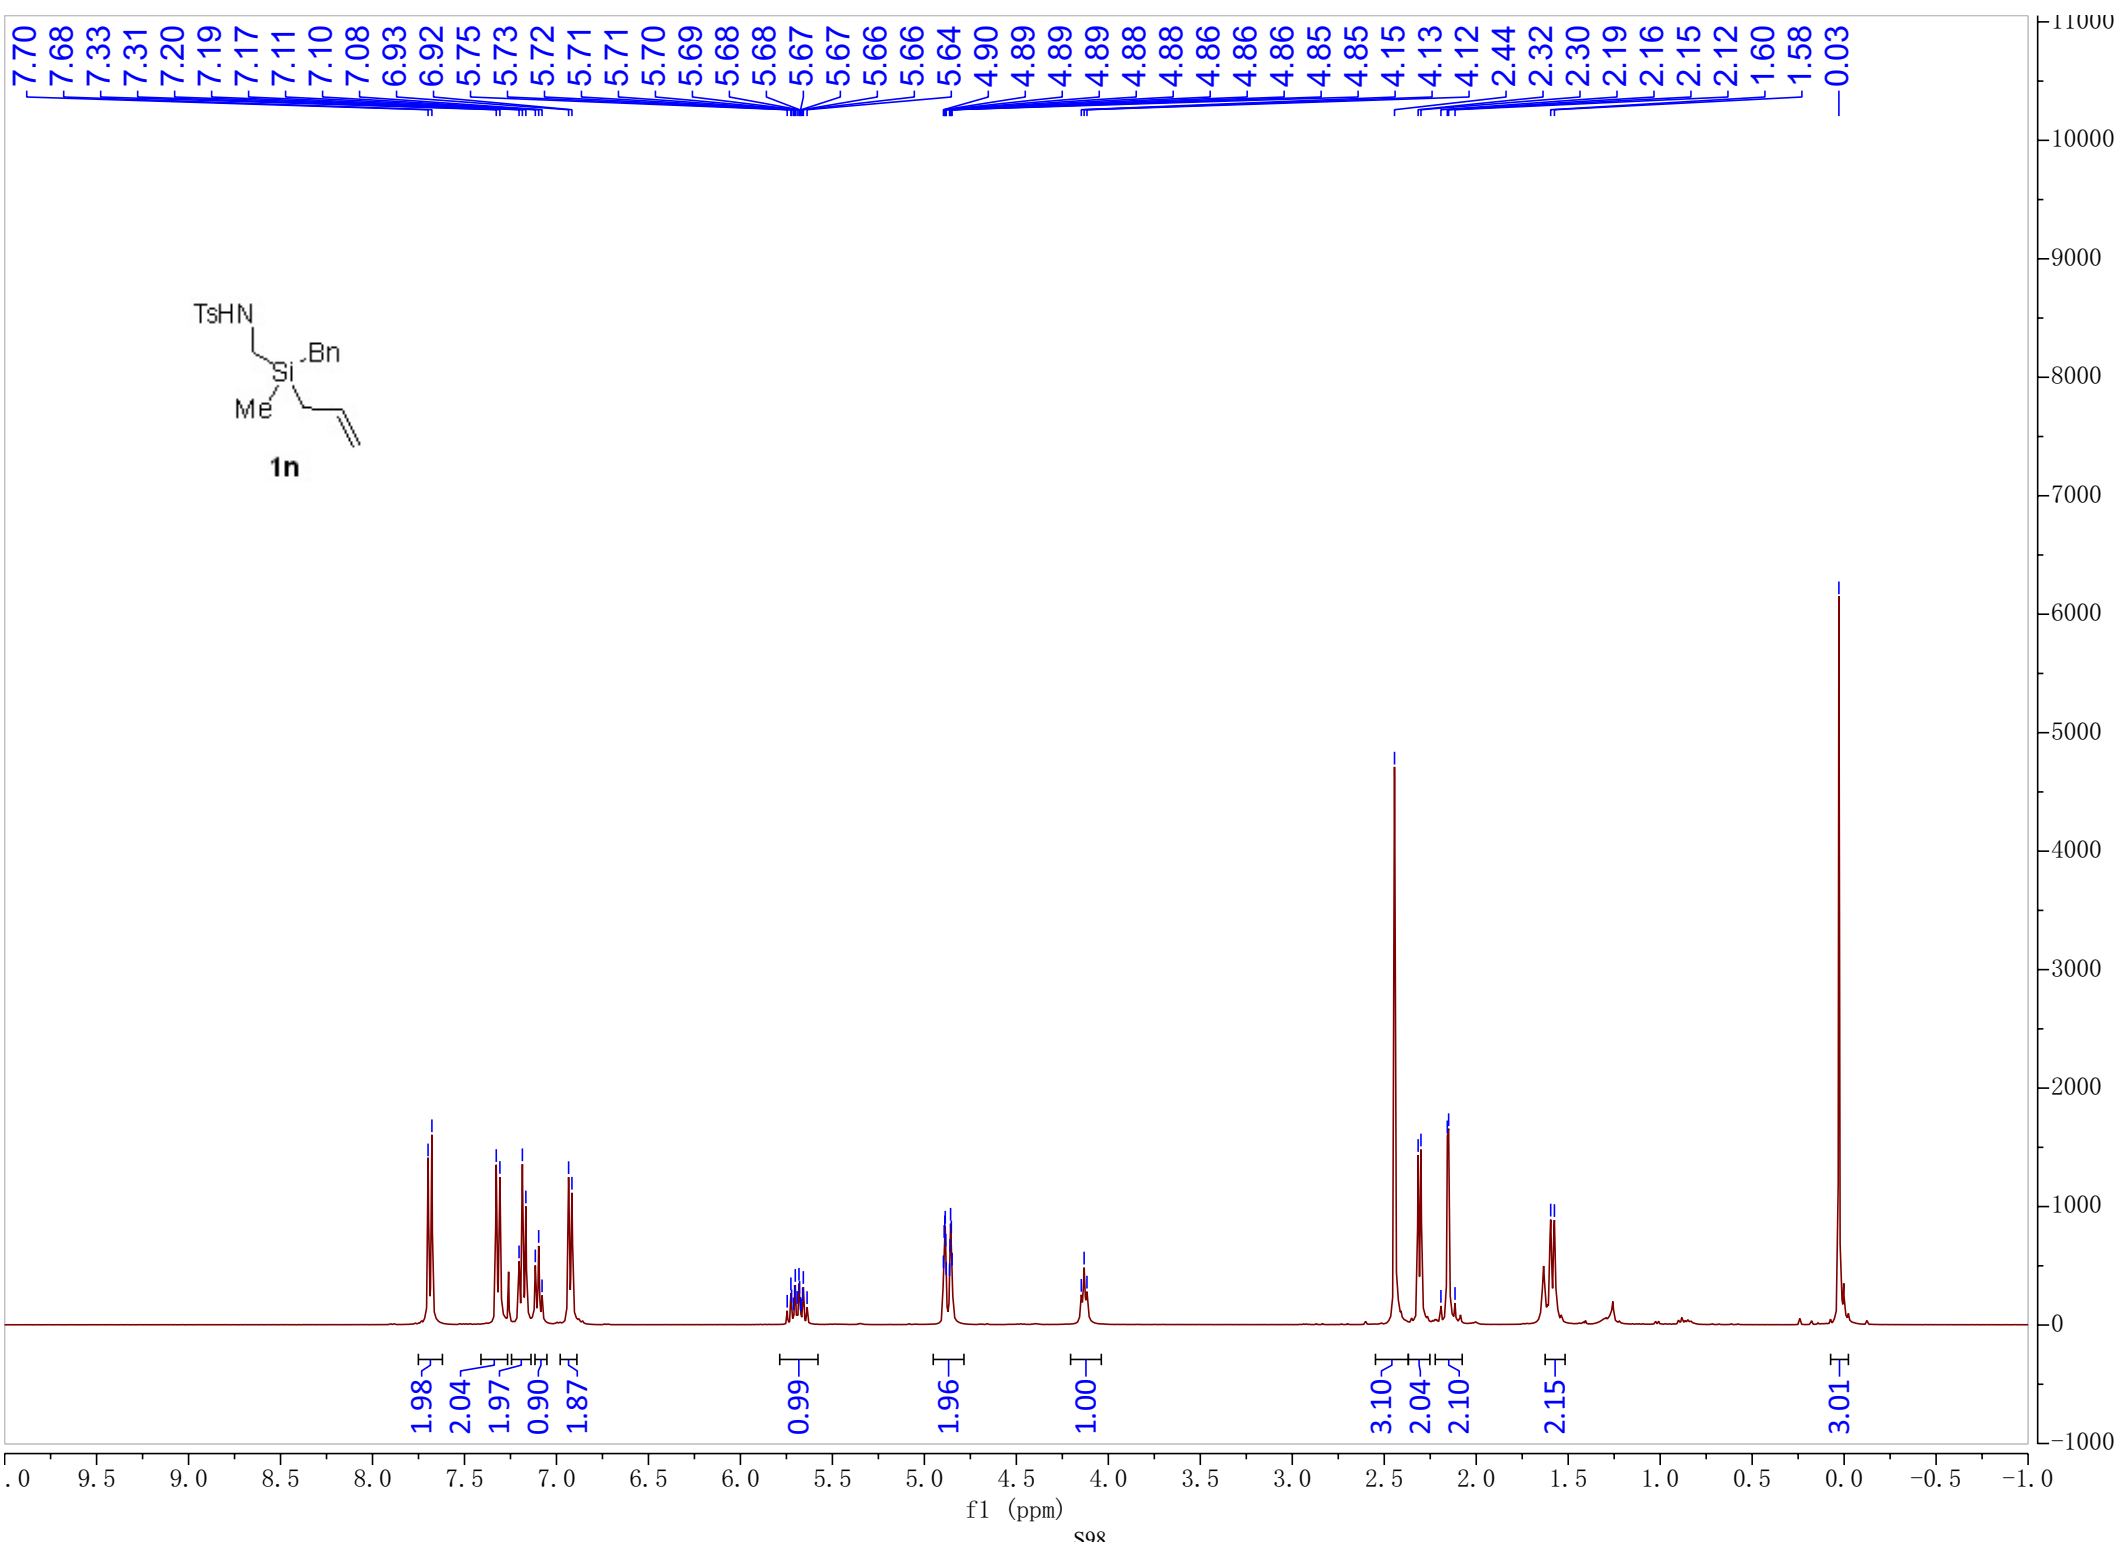

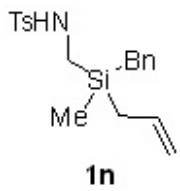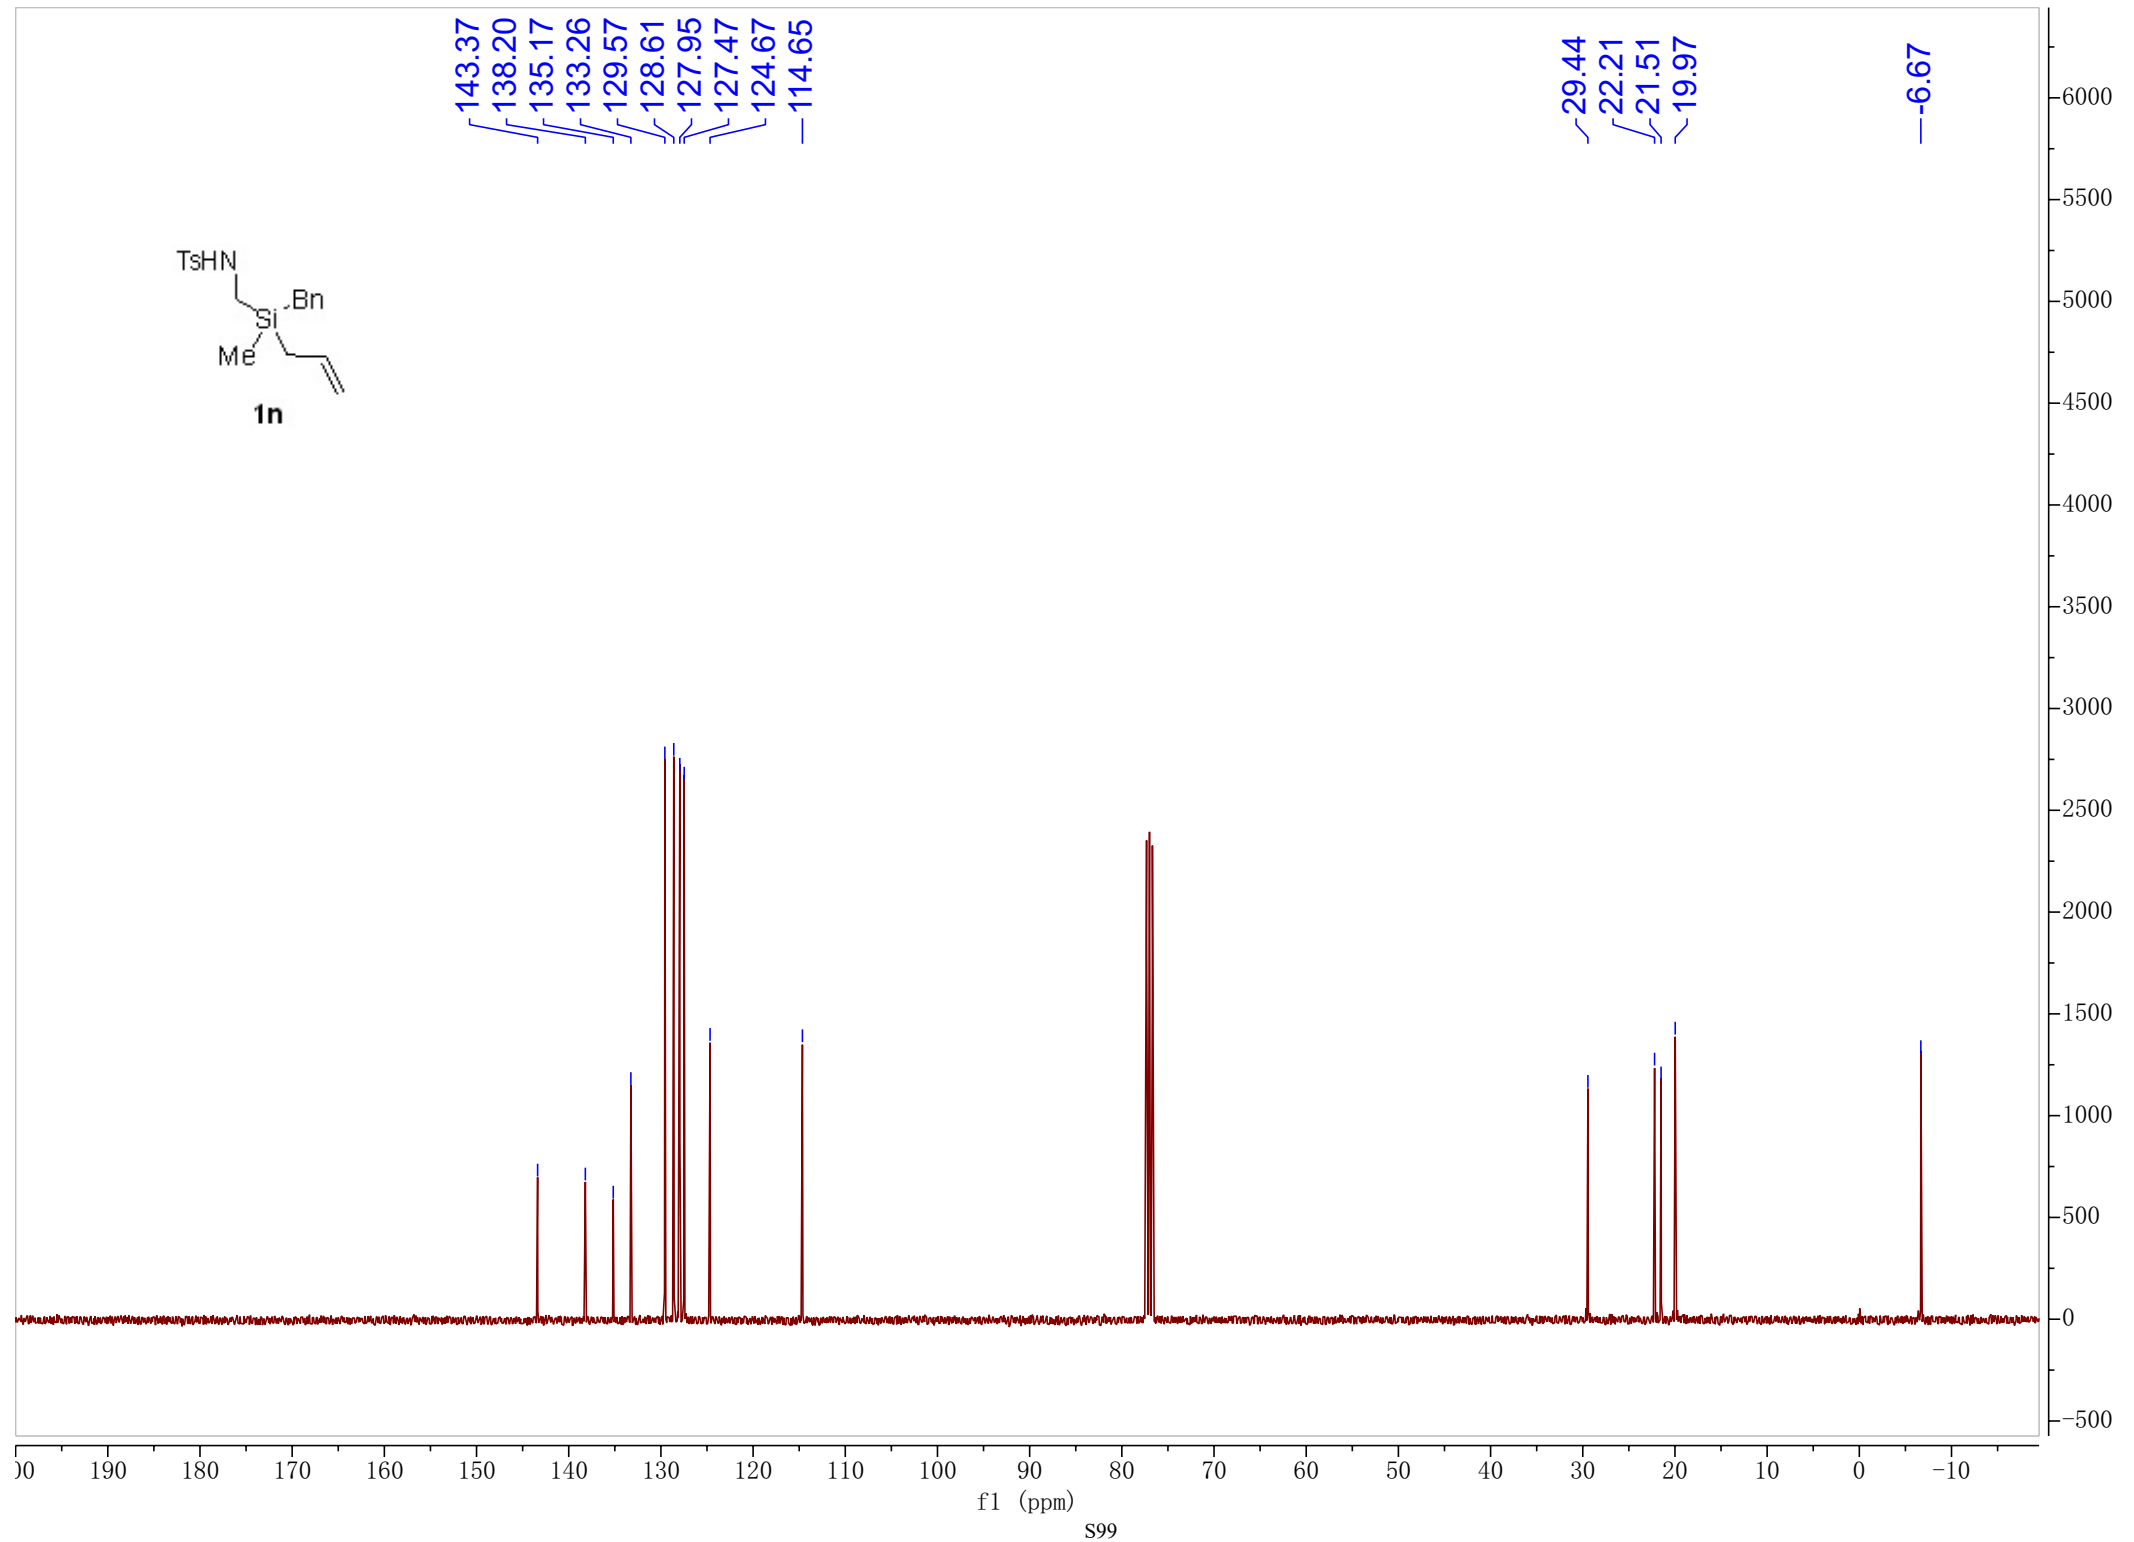

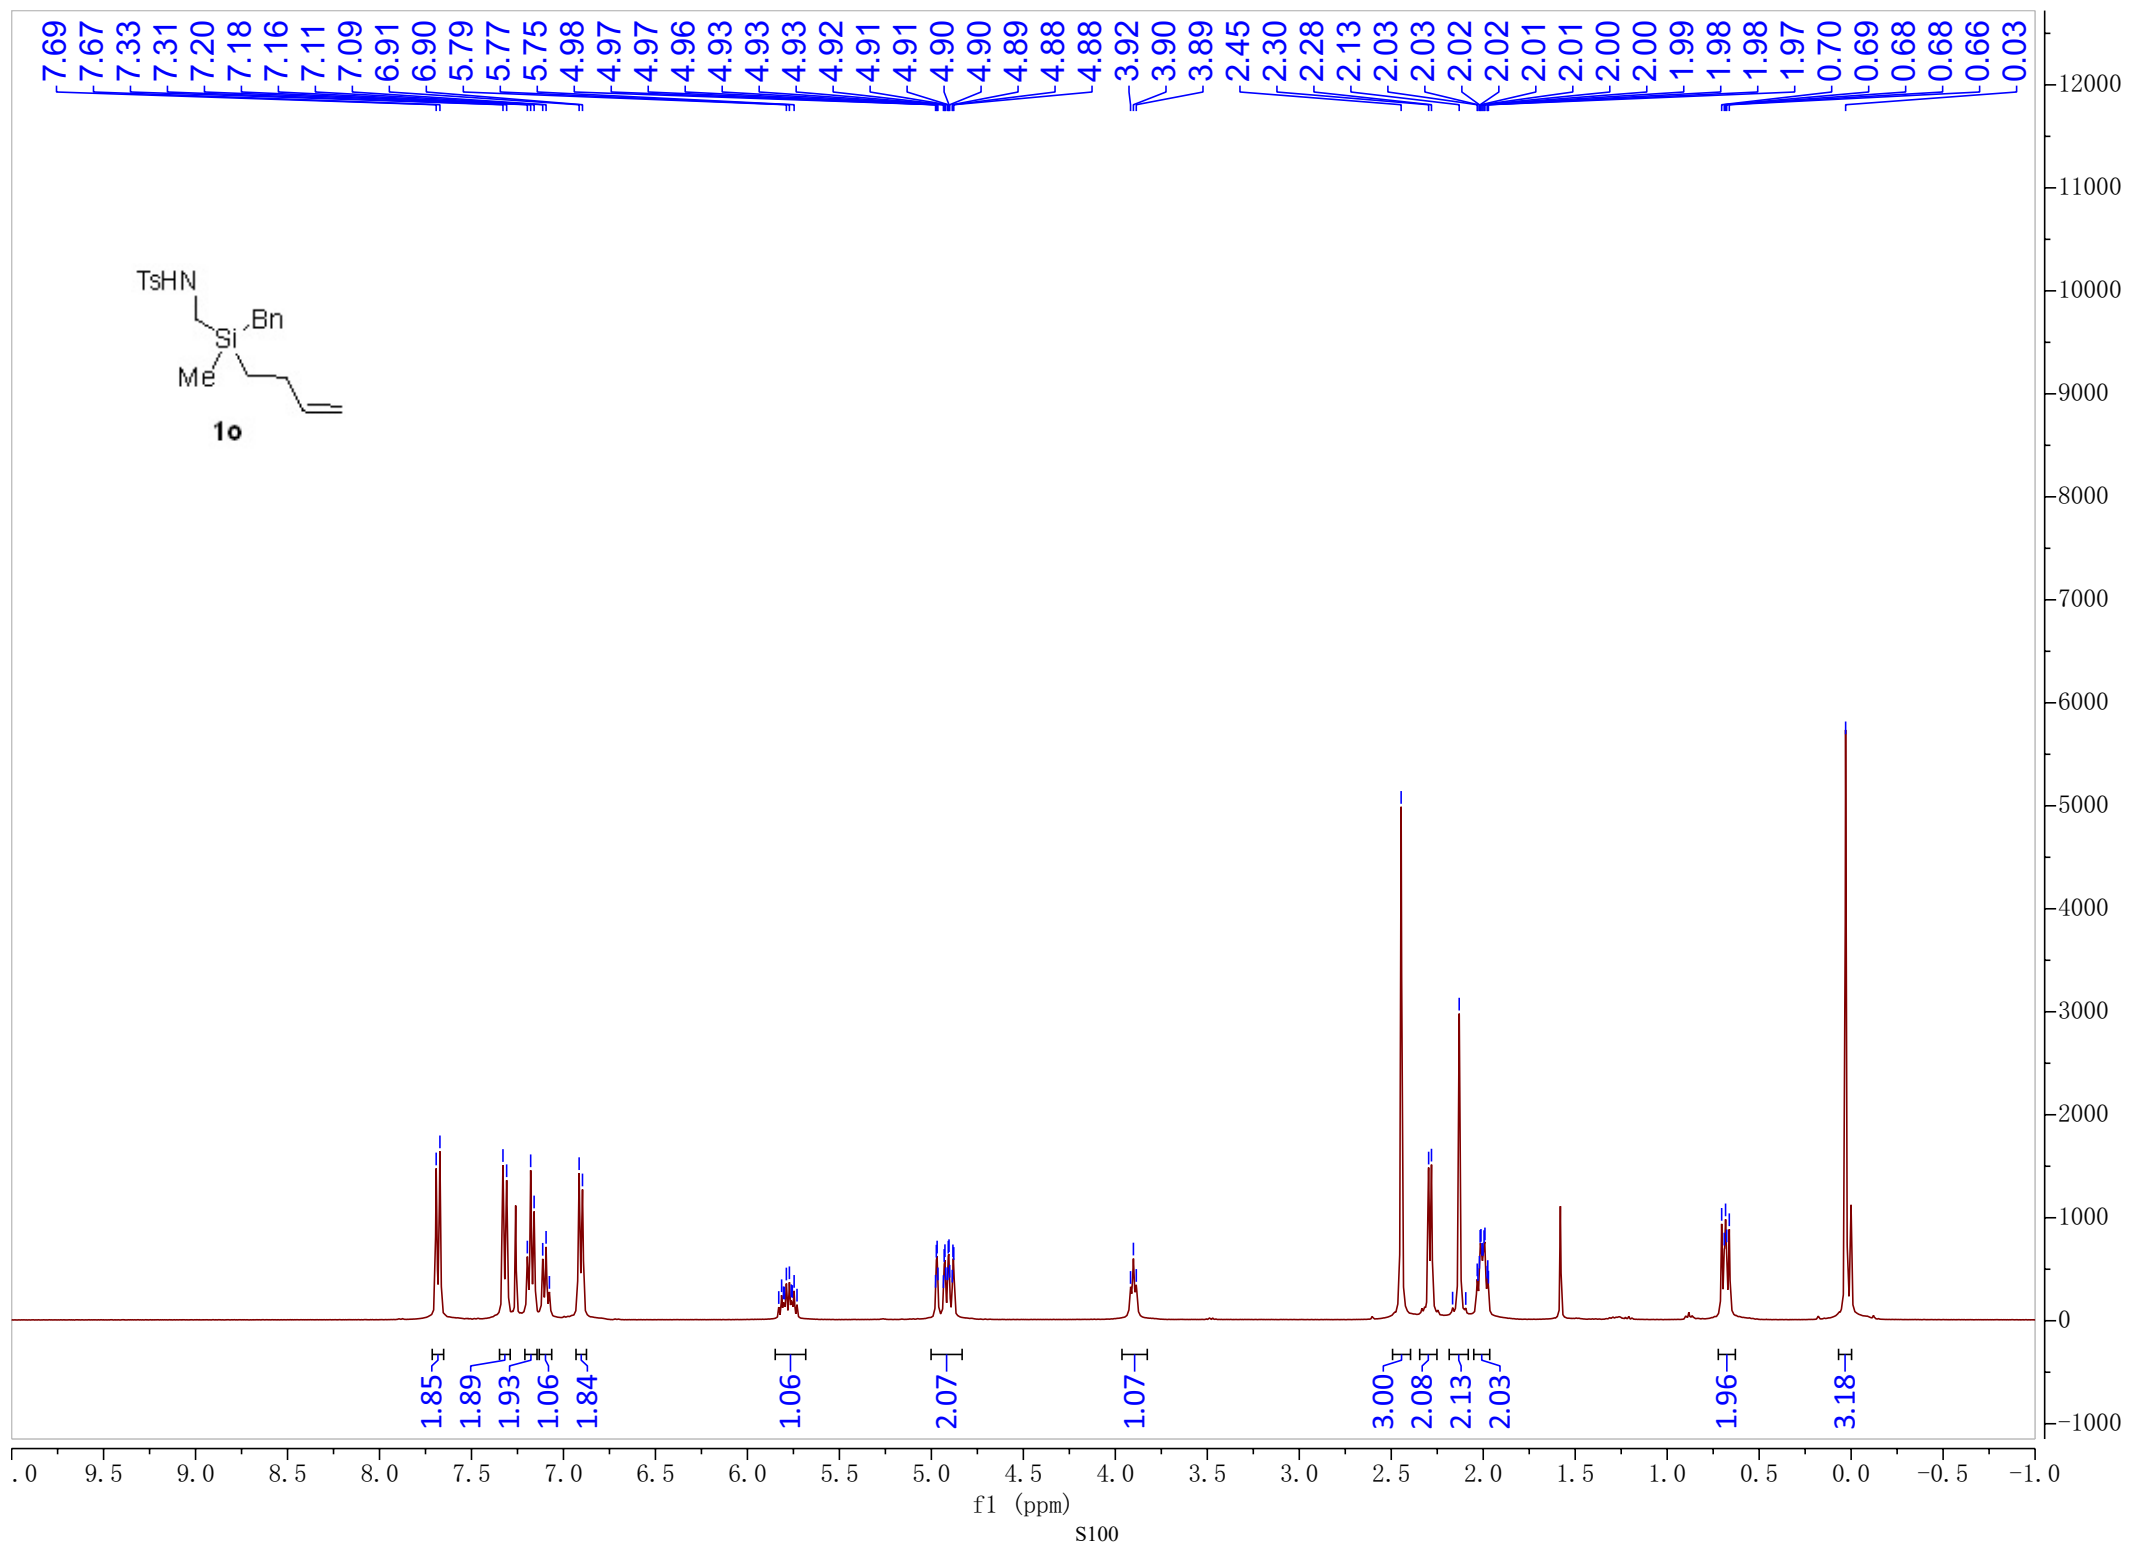

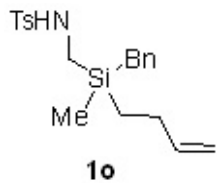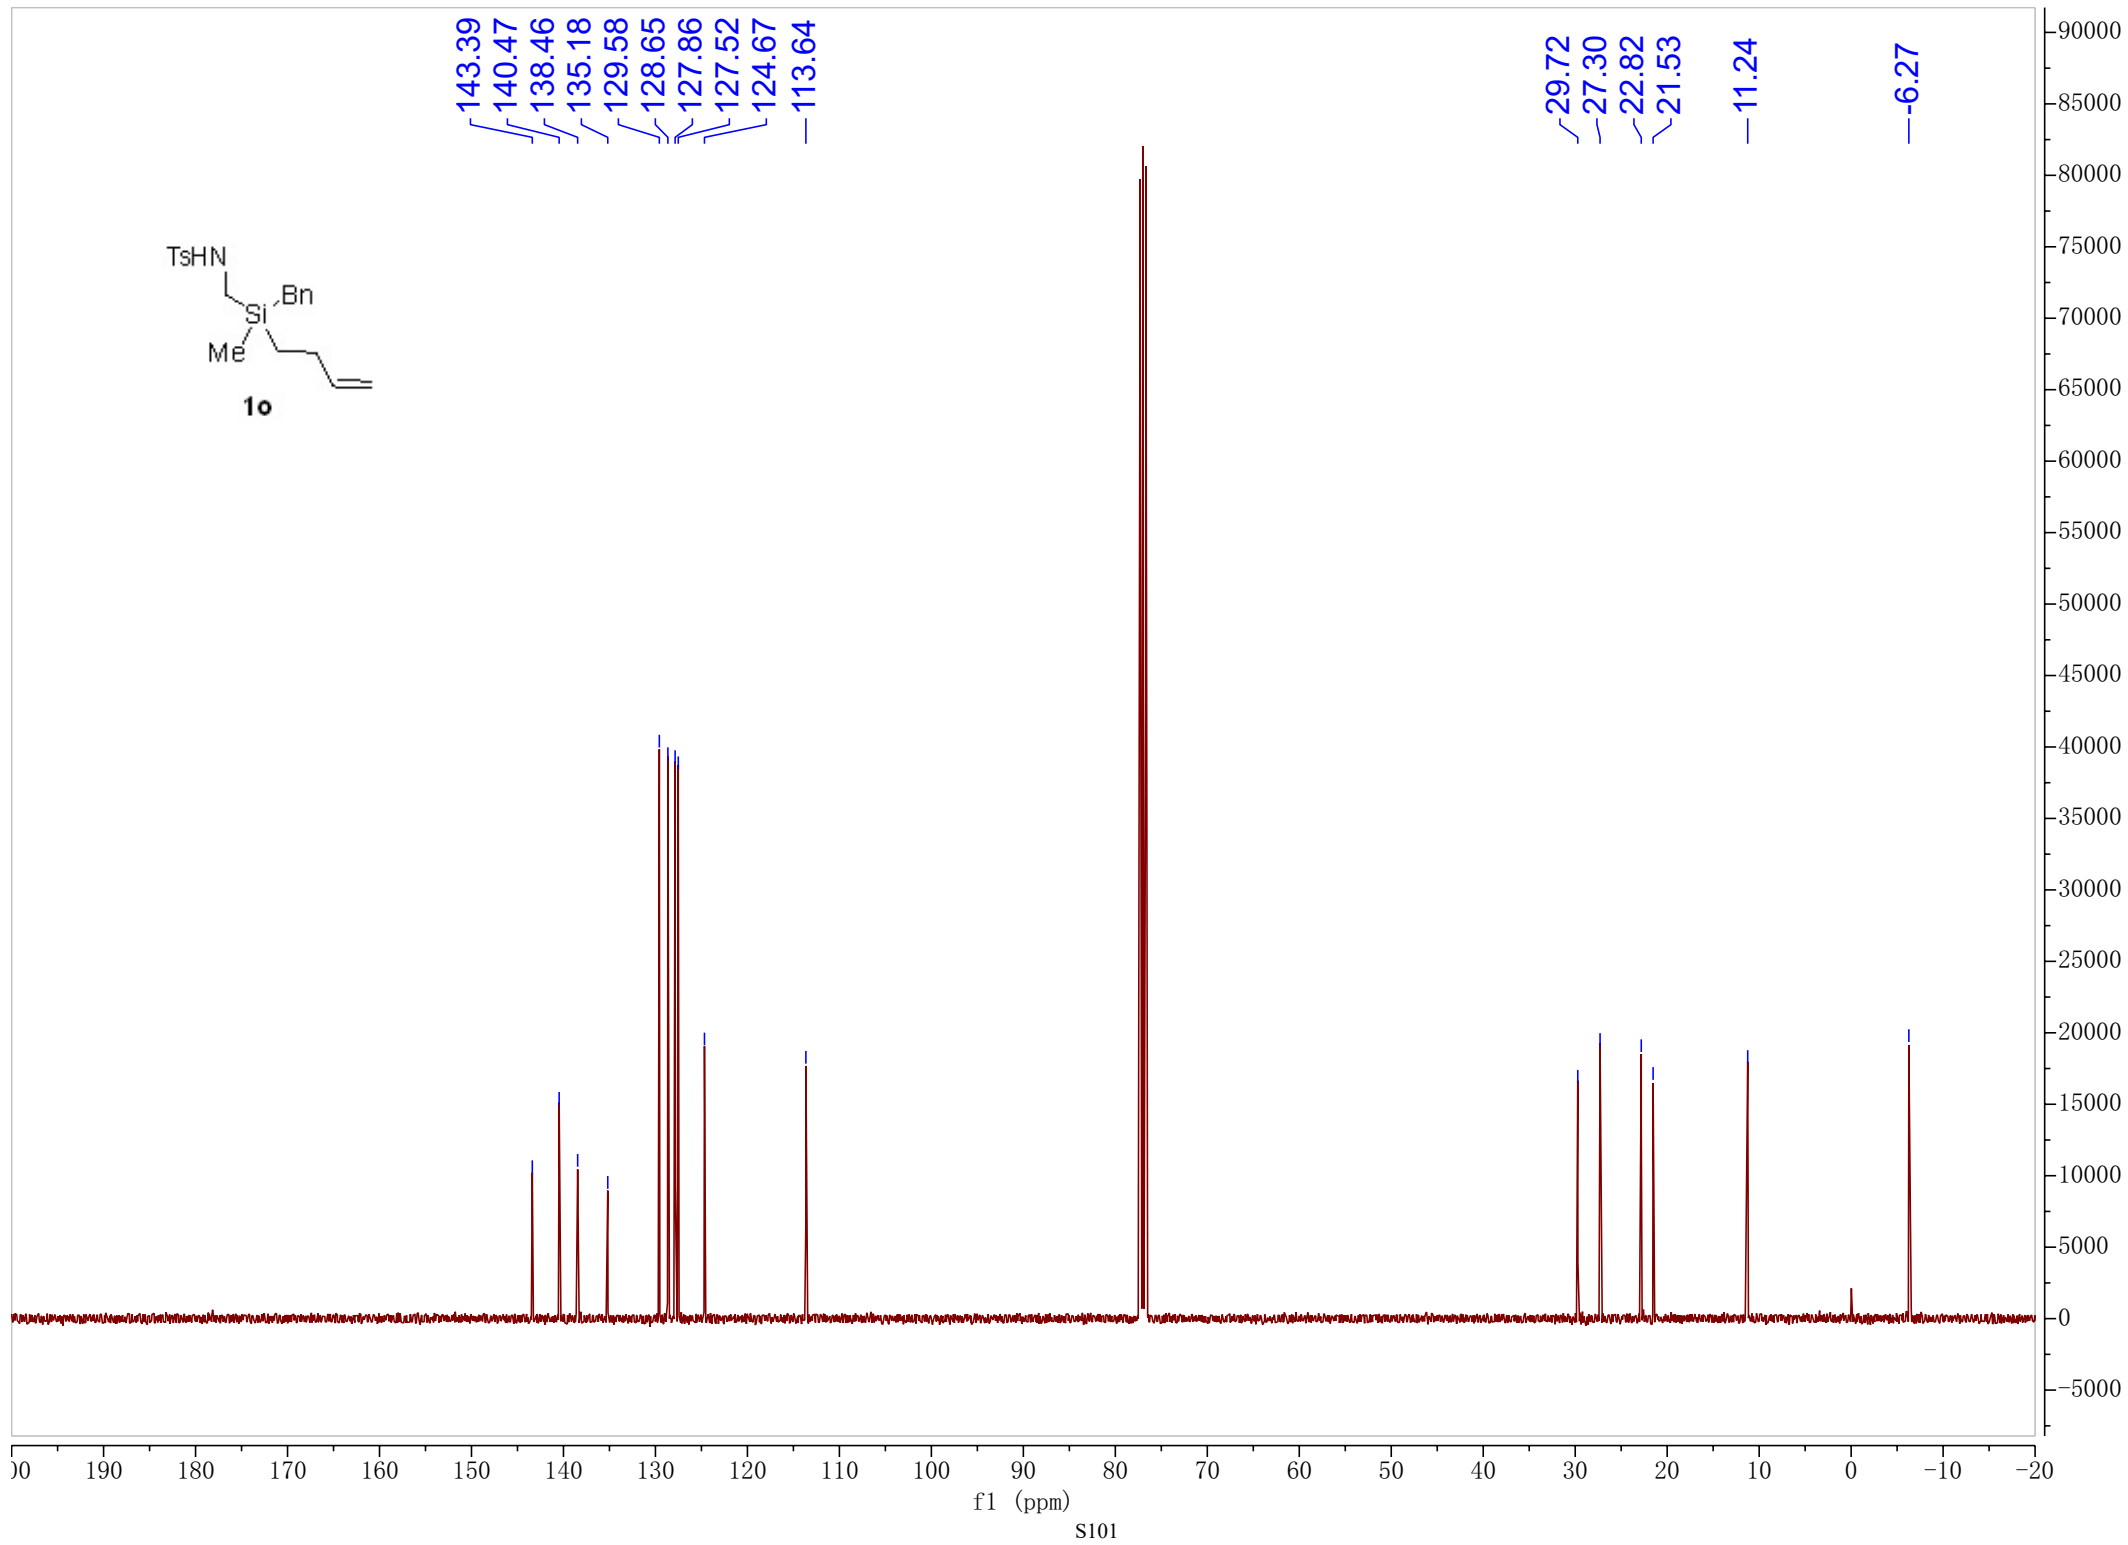

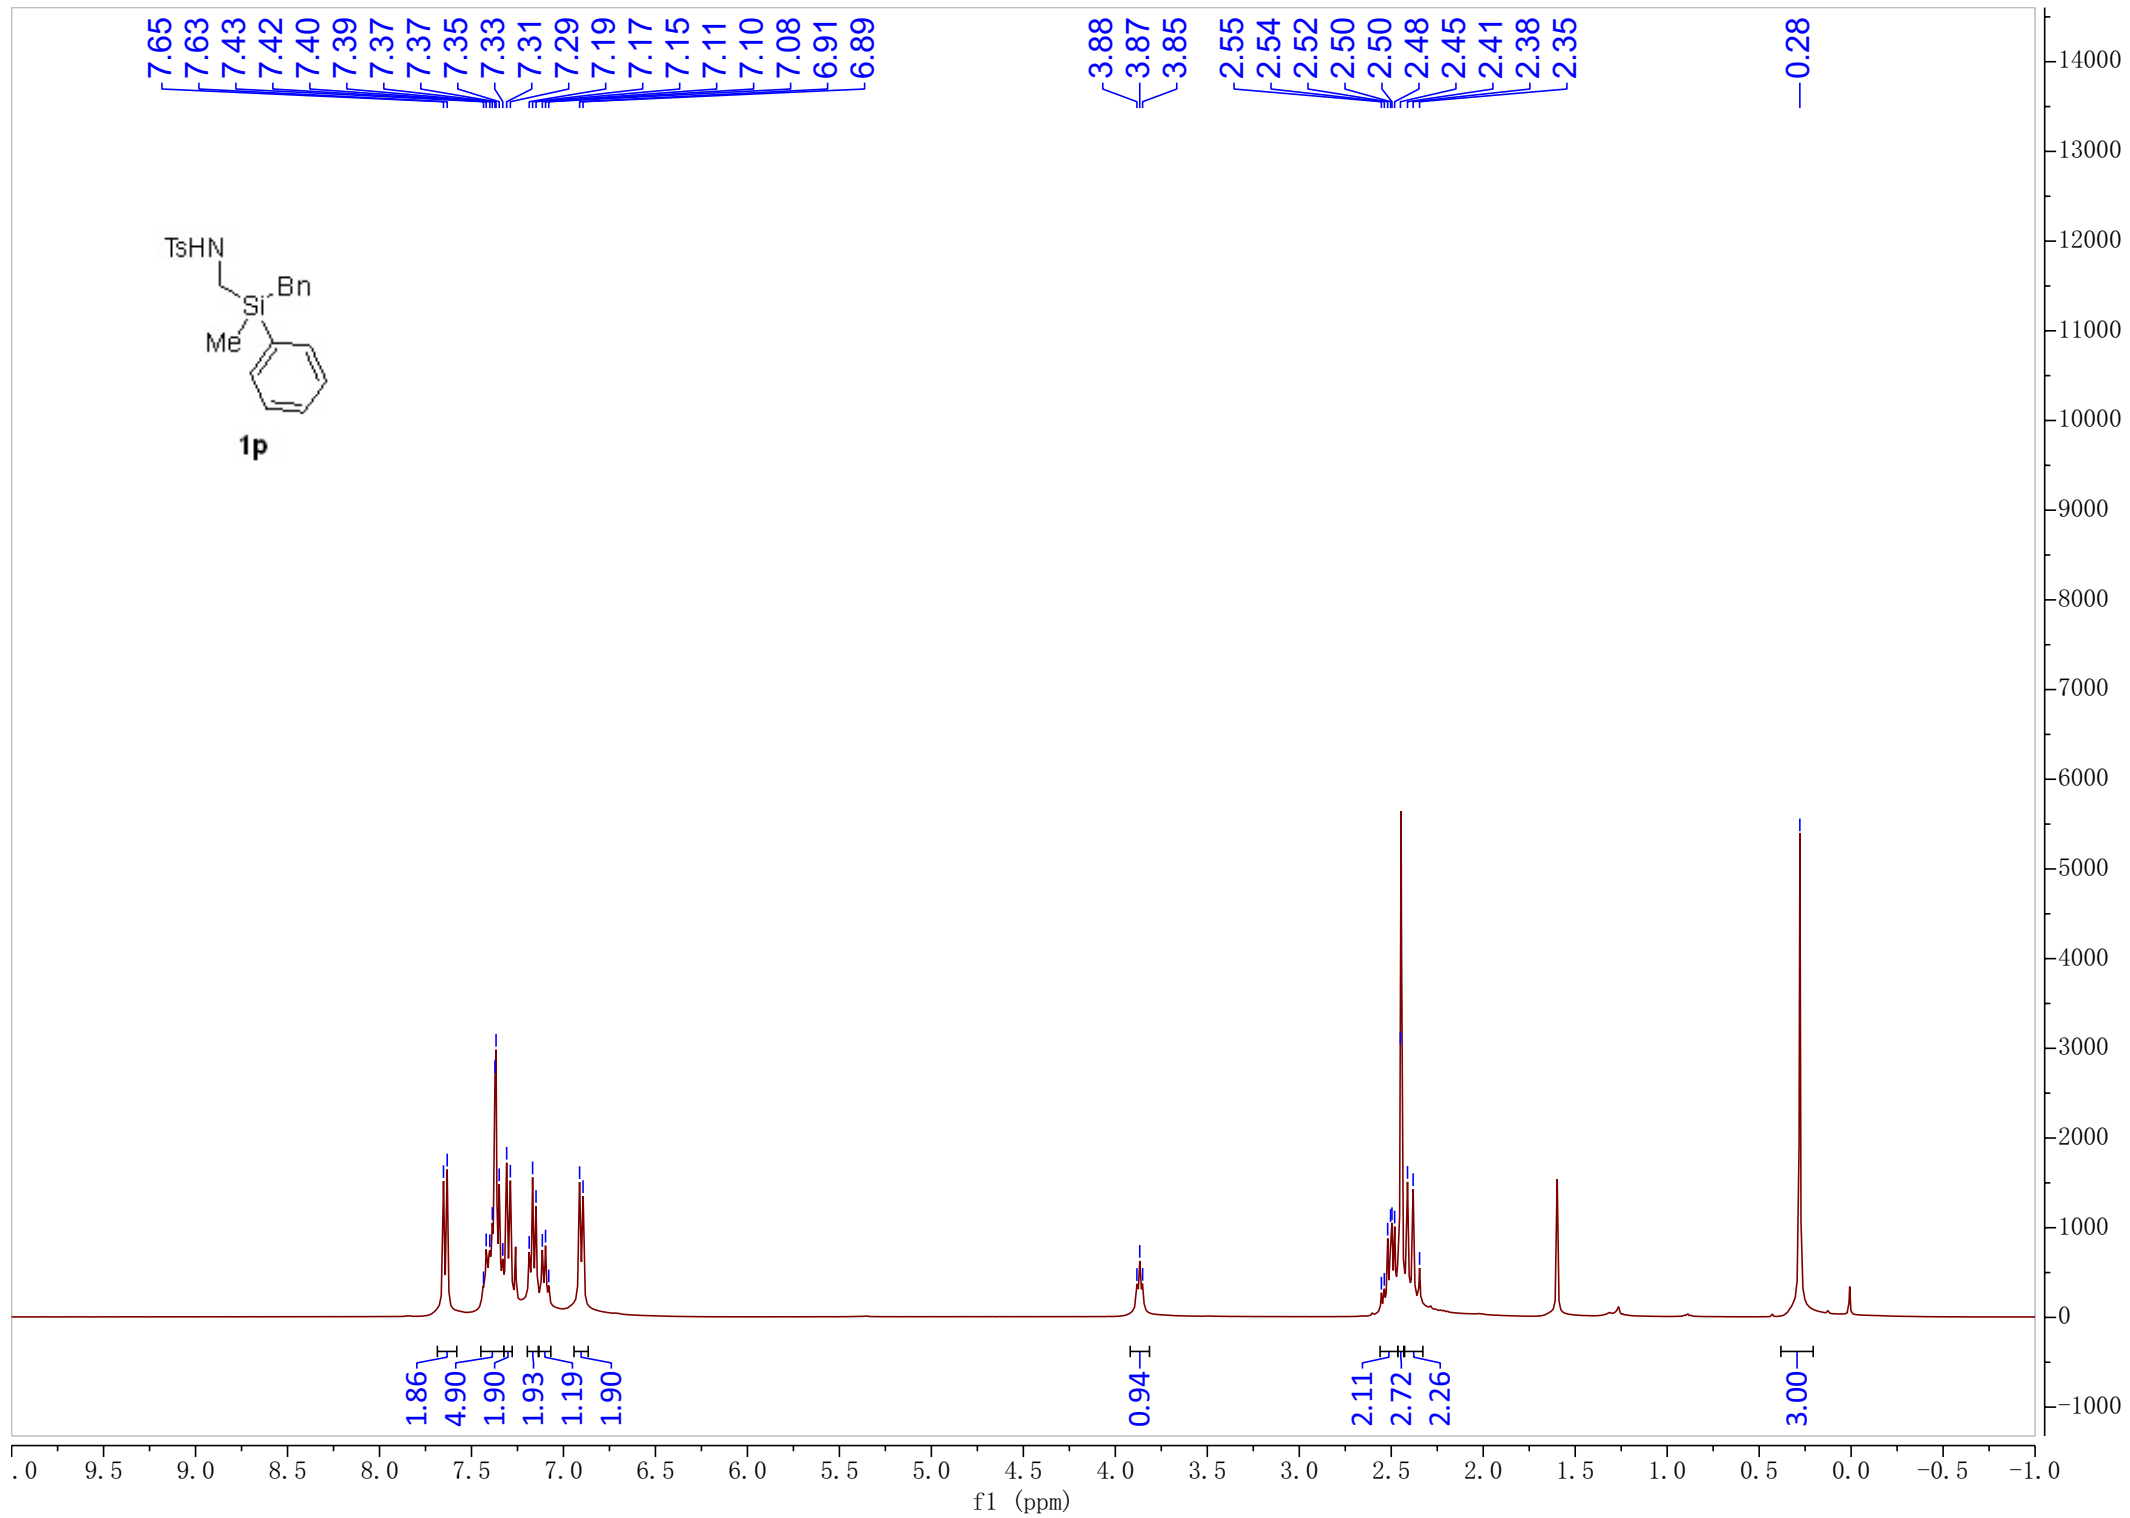

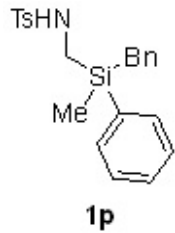

143.38  
137.80  
135.11  
133.97  
133.59  
130.11  
129.57  
128.54  
128.25  
128.18  
127.51  
124.78

-29.72  
22.64  
-21.52

--6.44

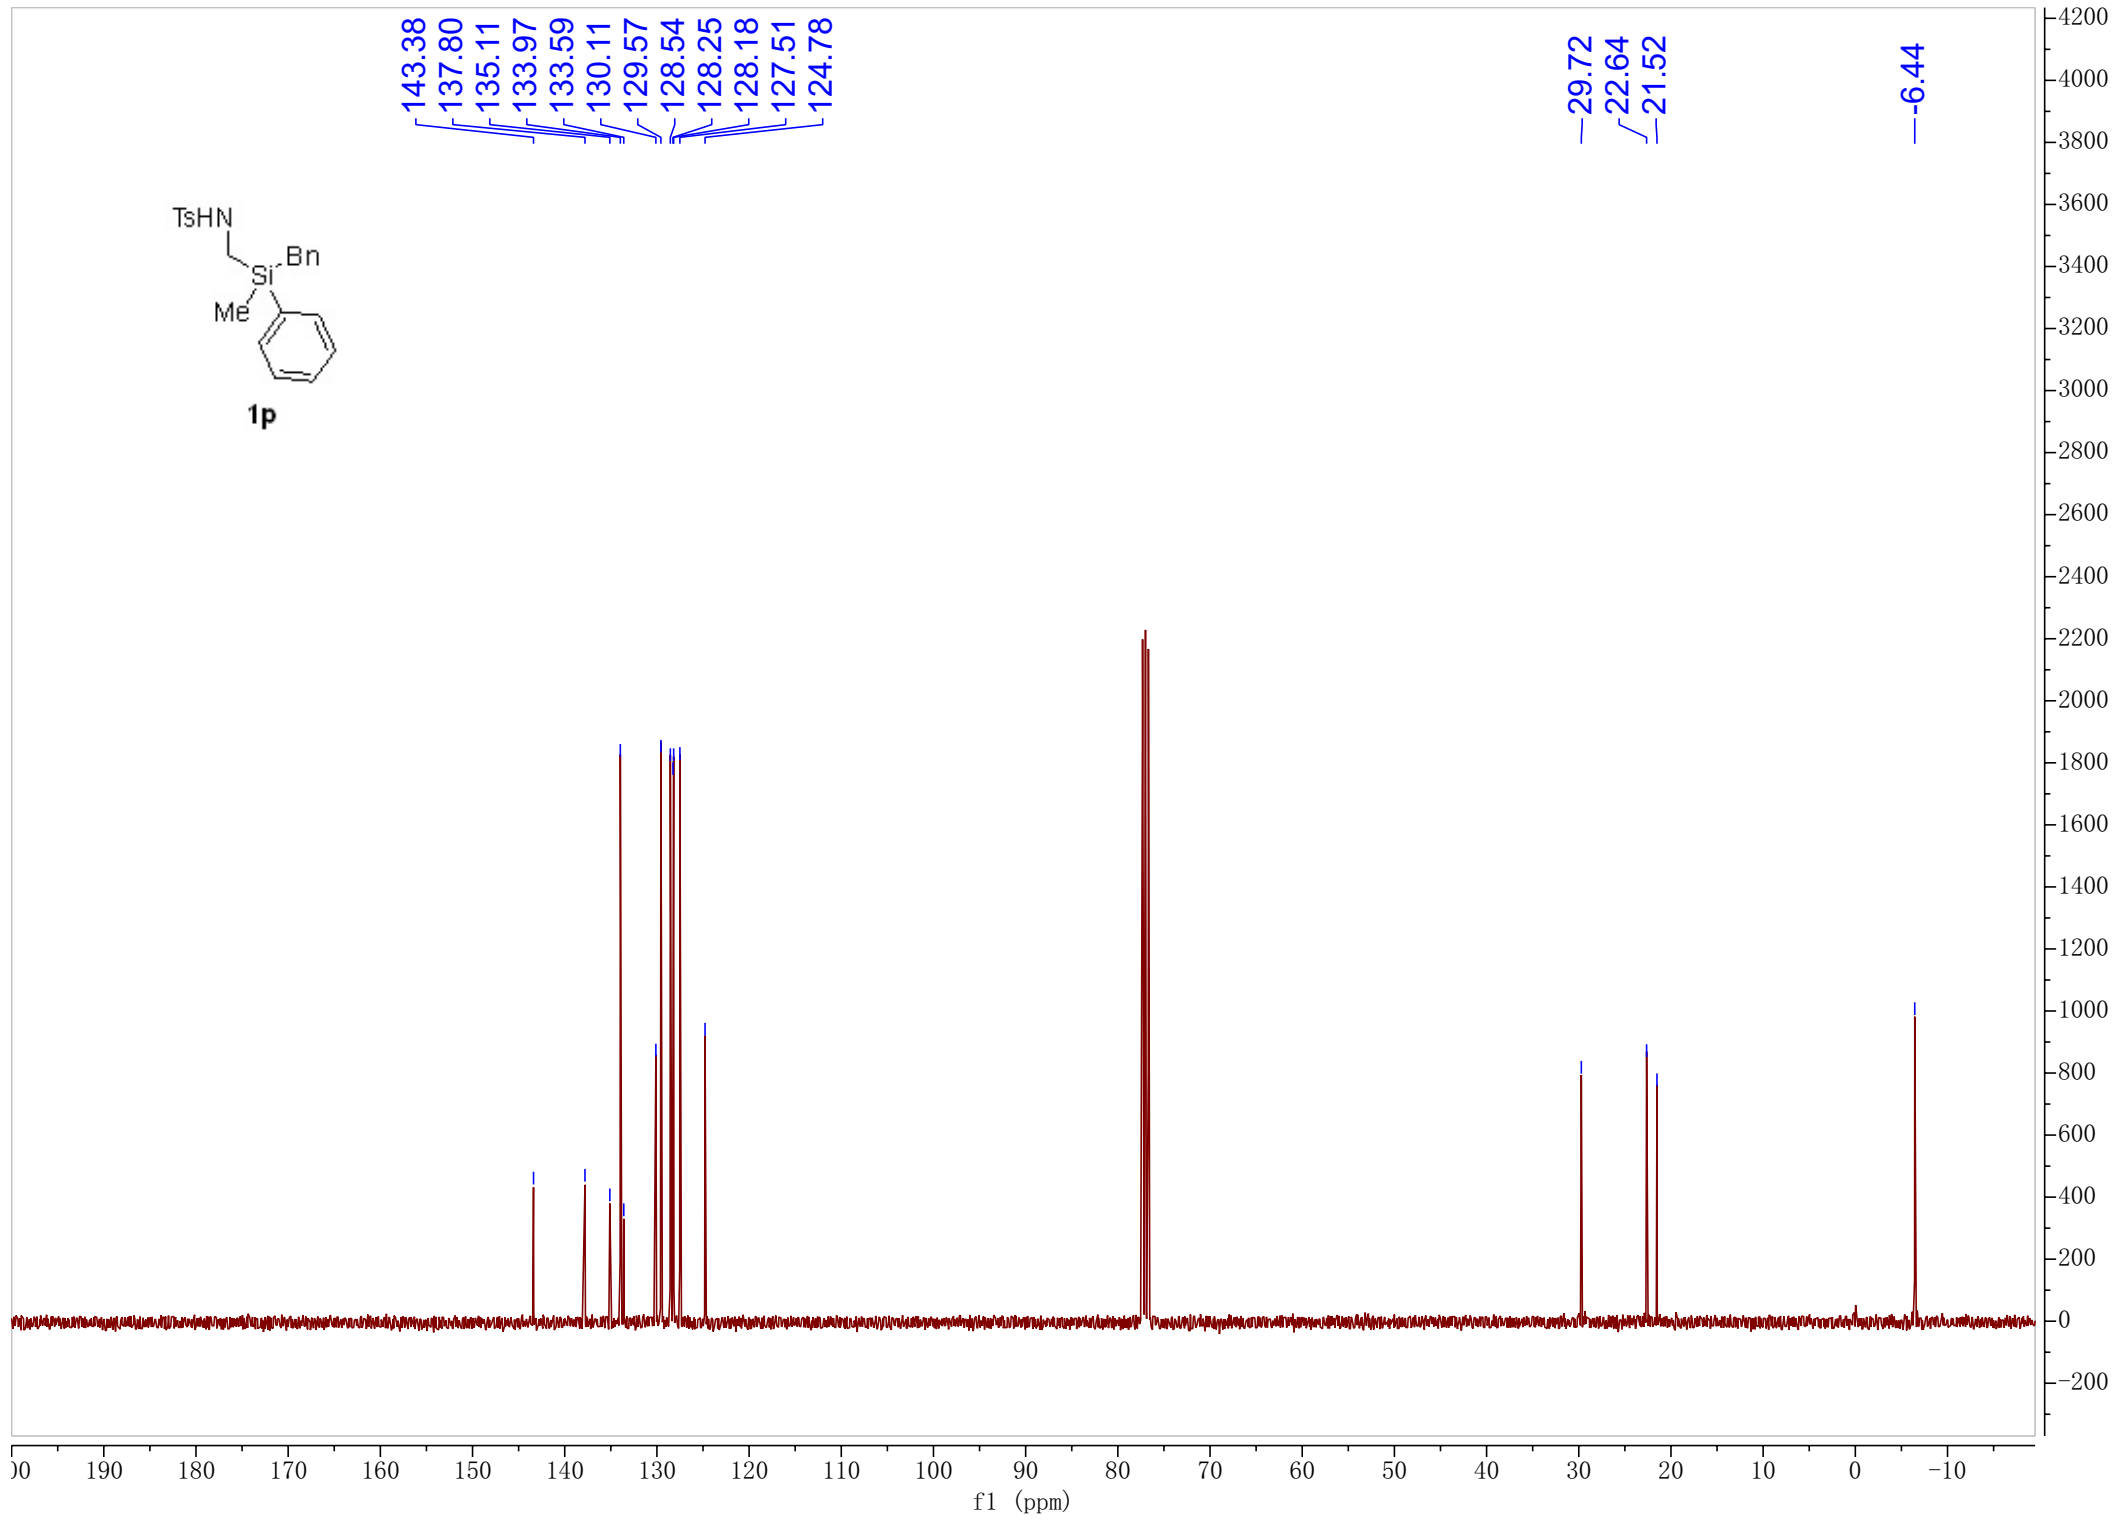

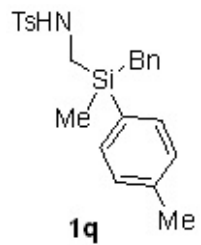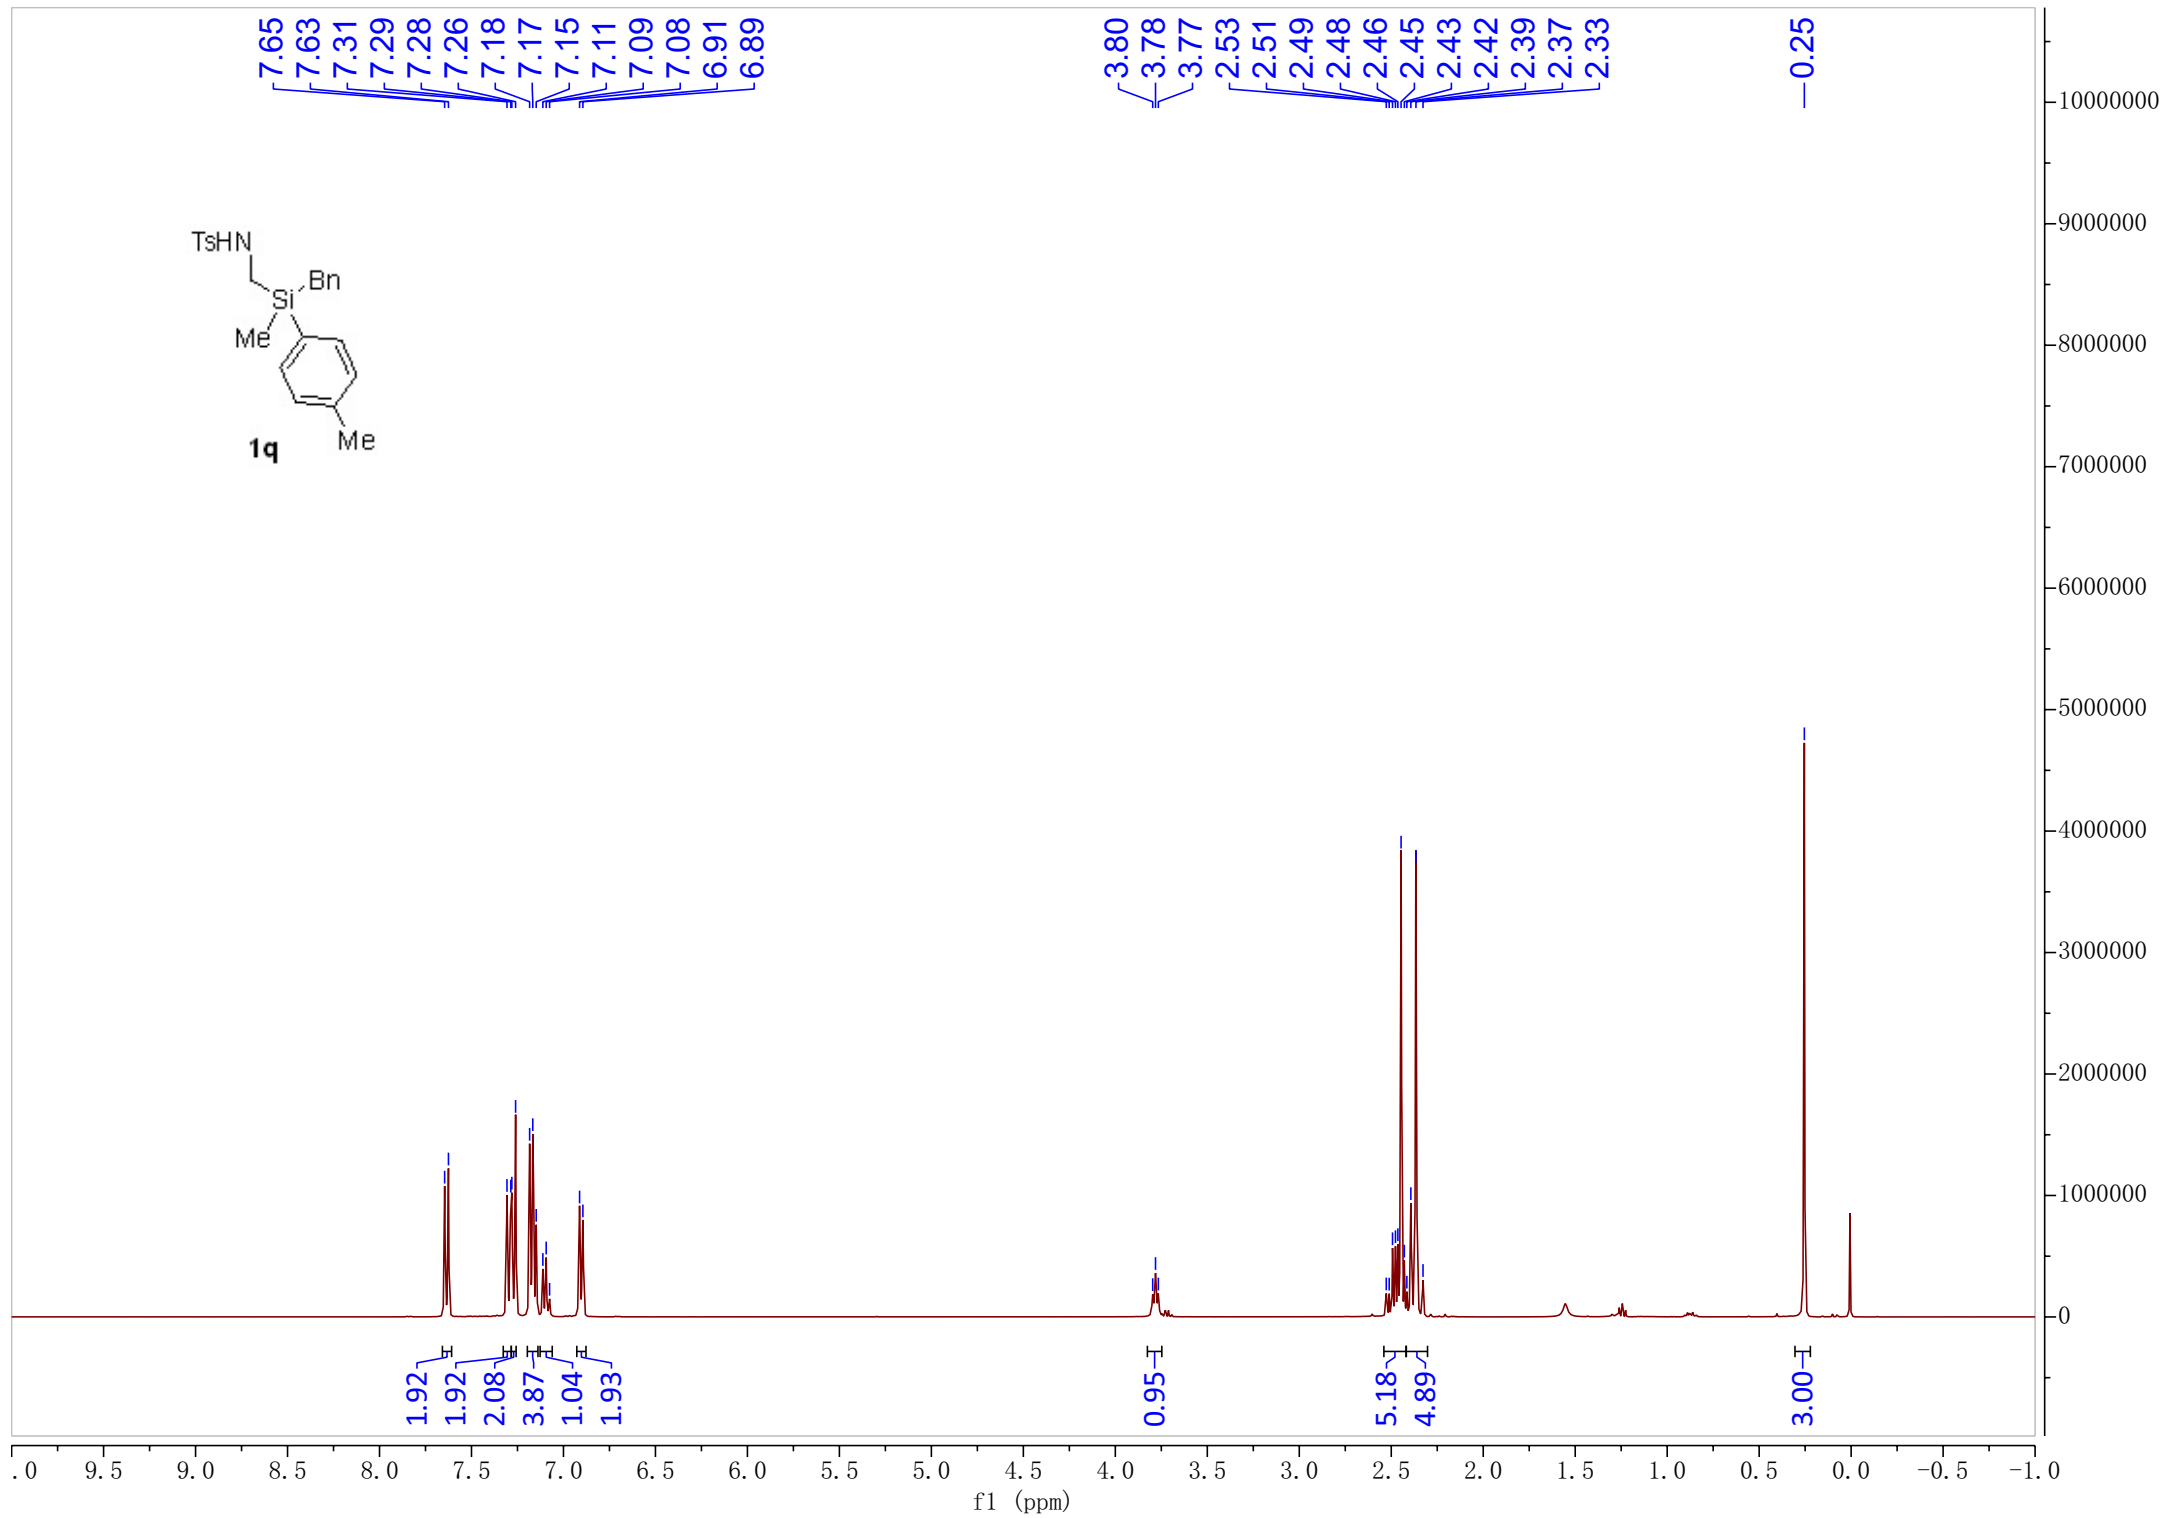



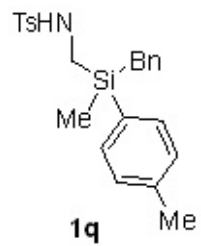

143.35  
140.22  
137.94  
135.14  
134.02  
129.78  
129.55  
129.12  
128.54  
128.18  
127.52  
124.74

29.78  
22.73  
21.53  
21.50

-6.36

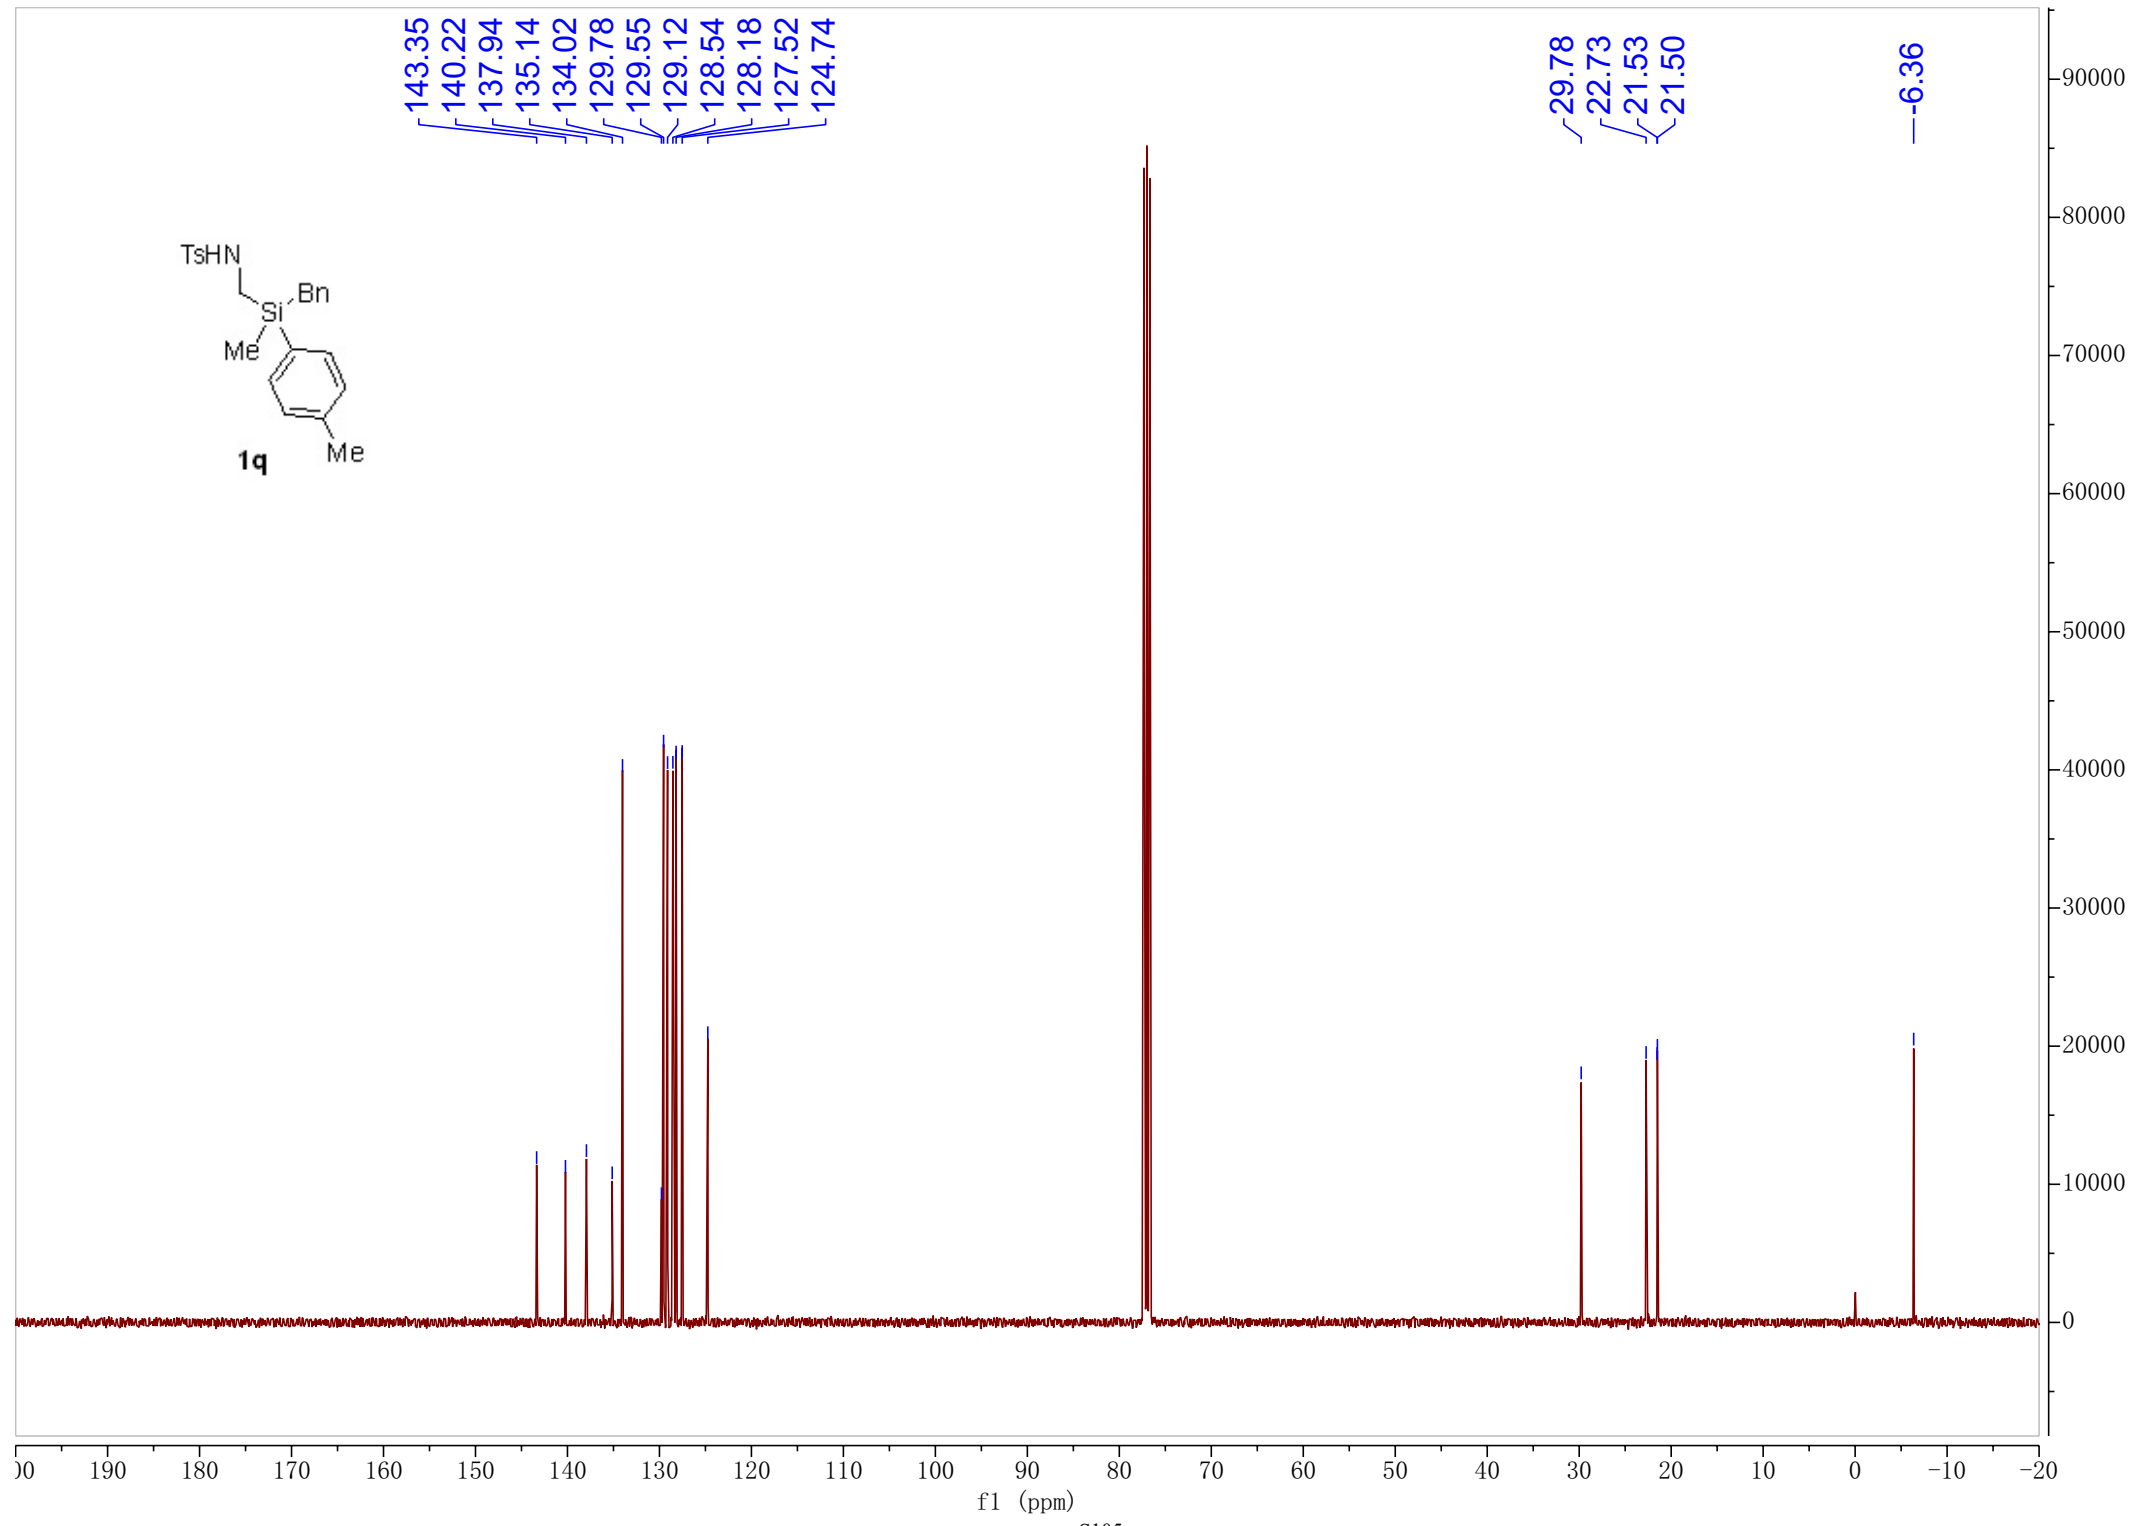

f1 (ppm)

S105

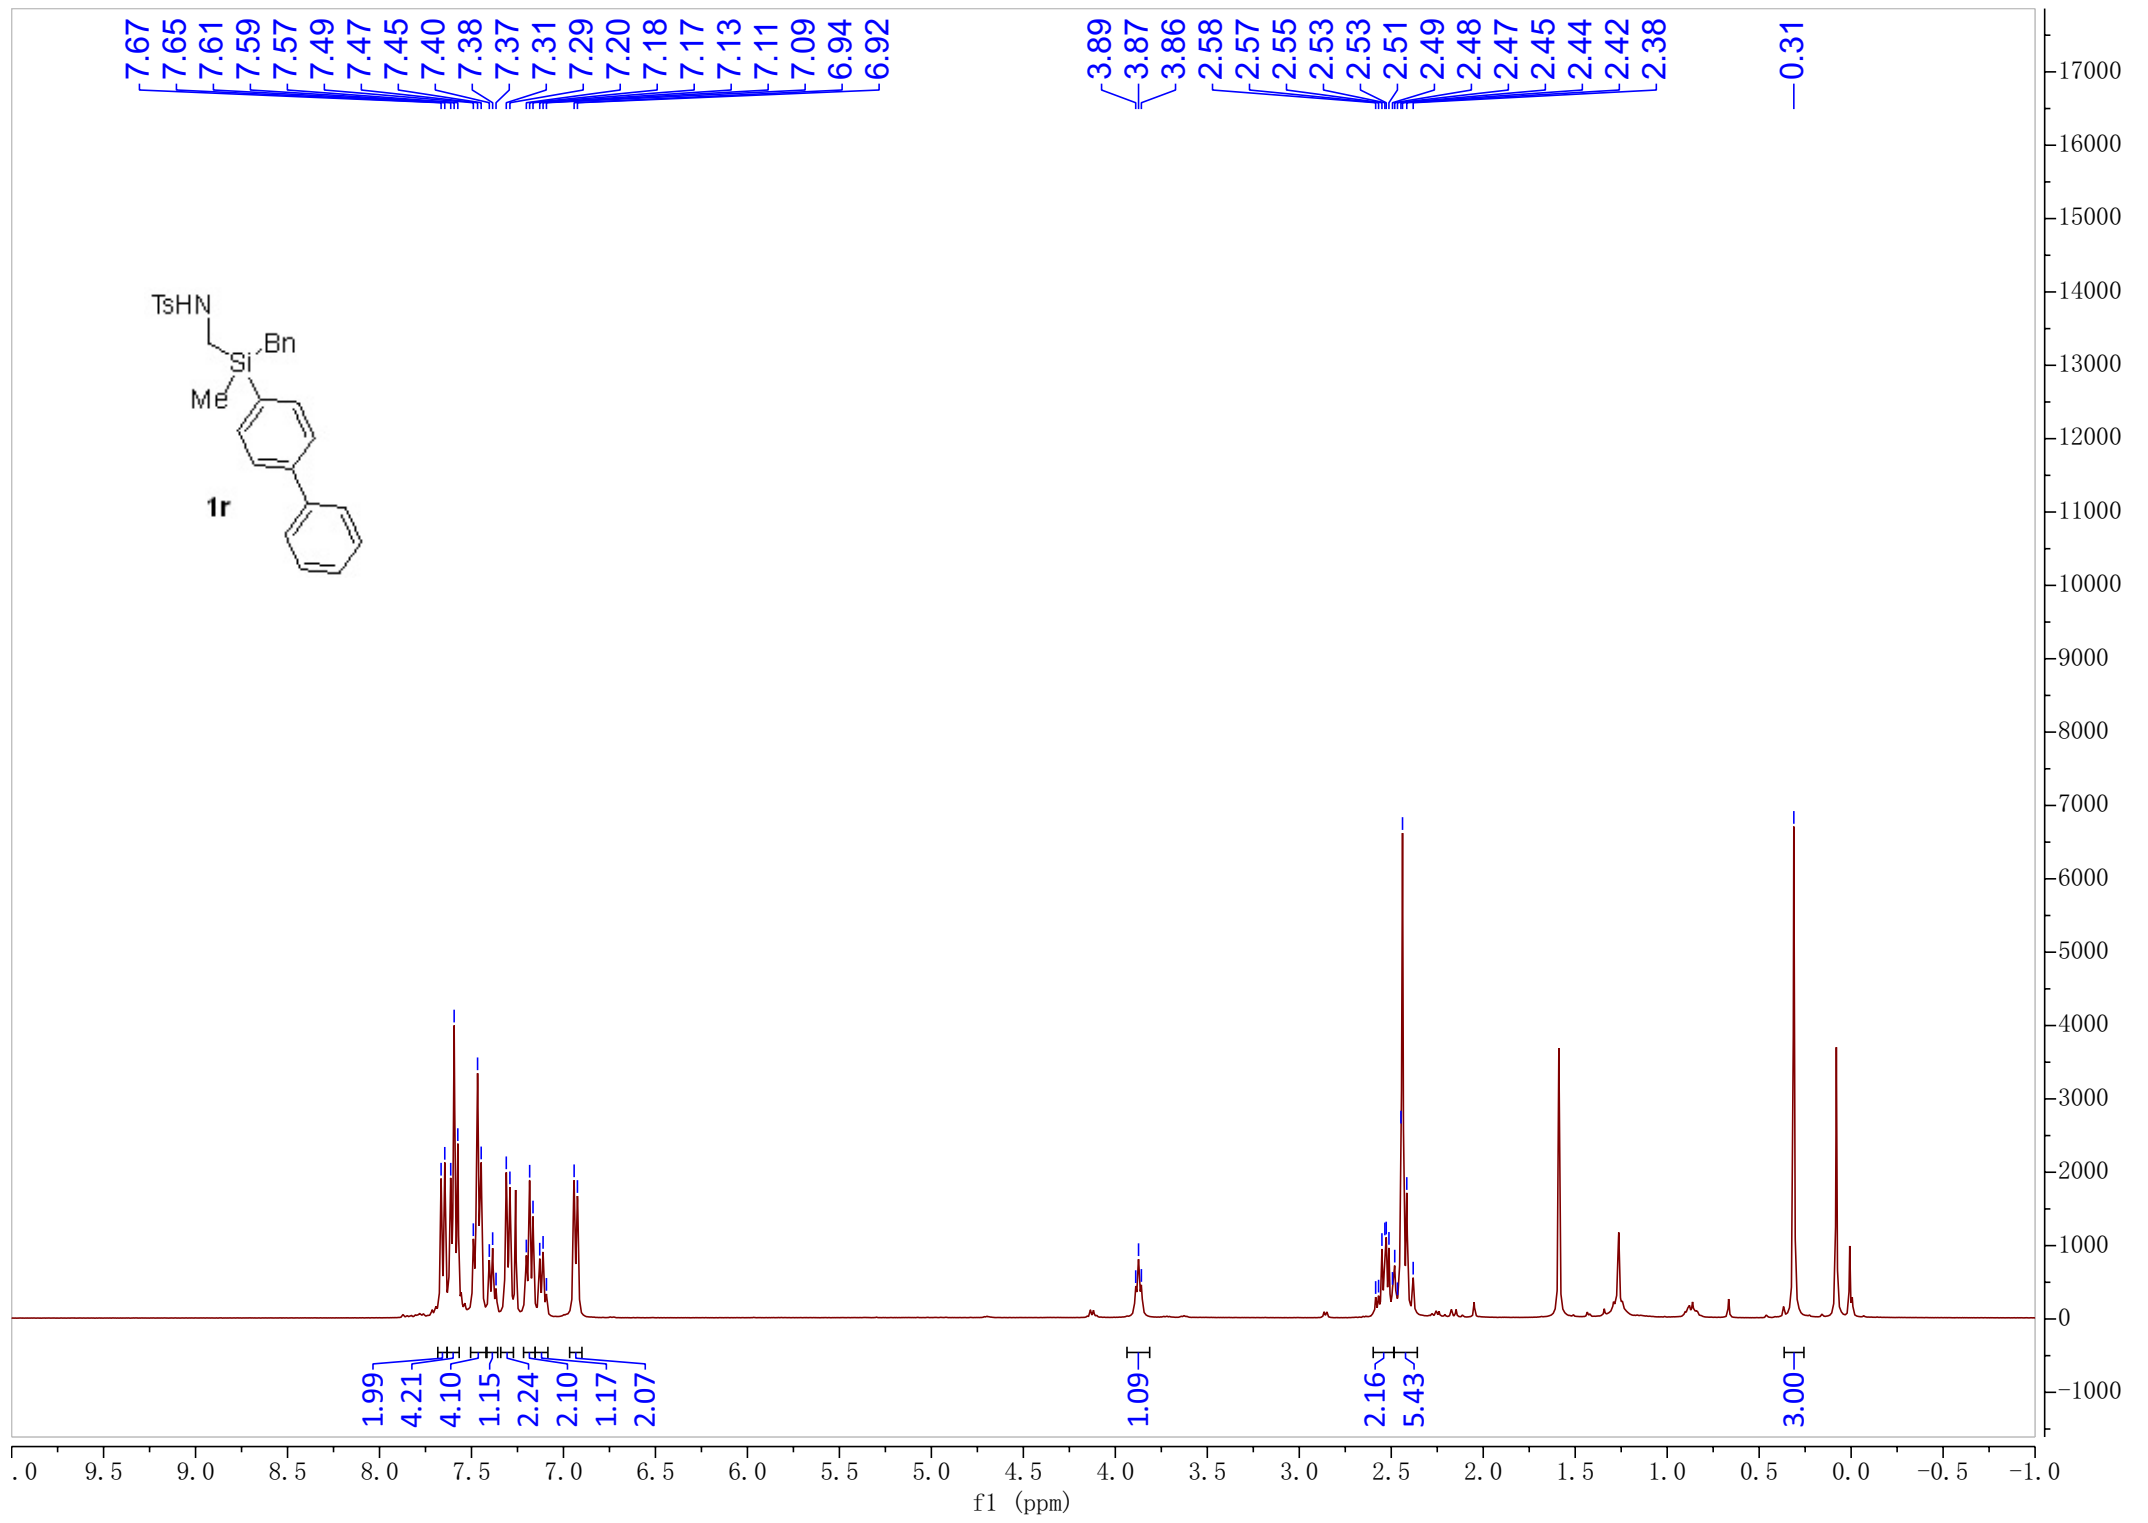

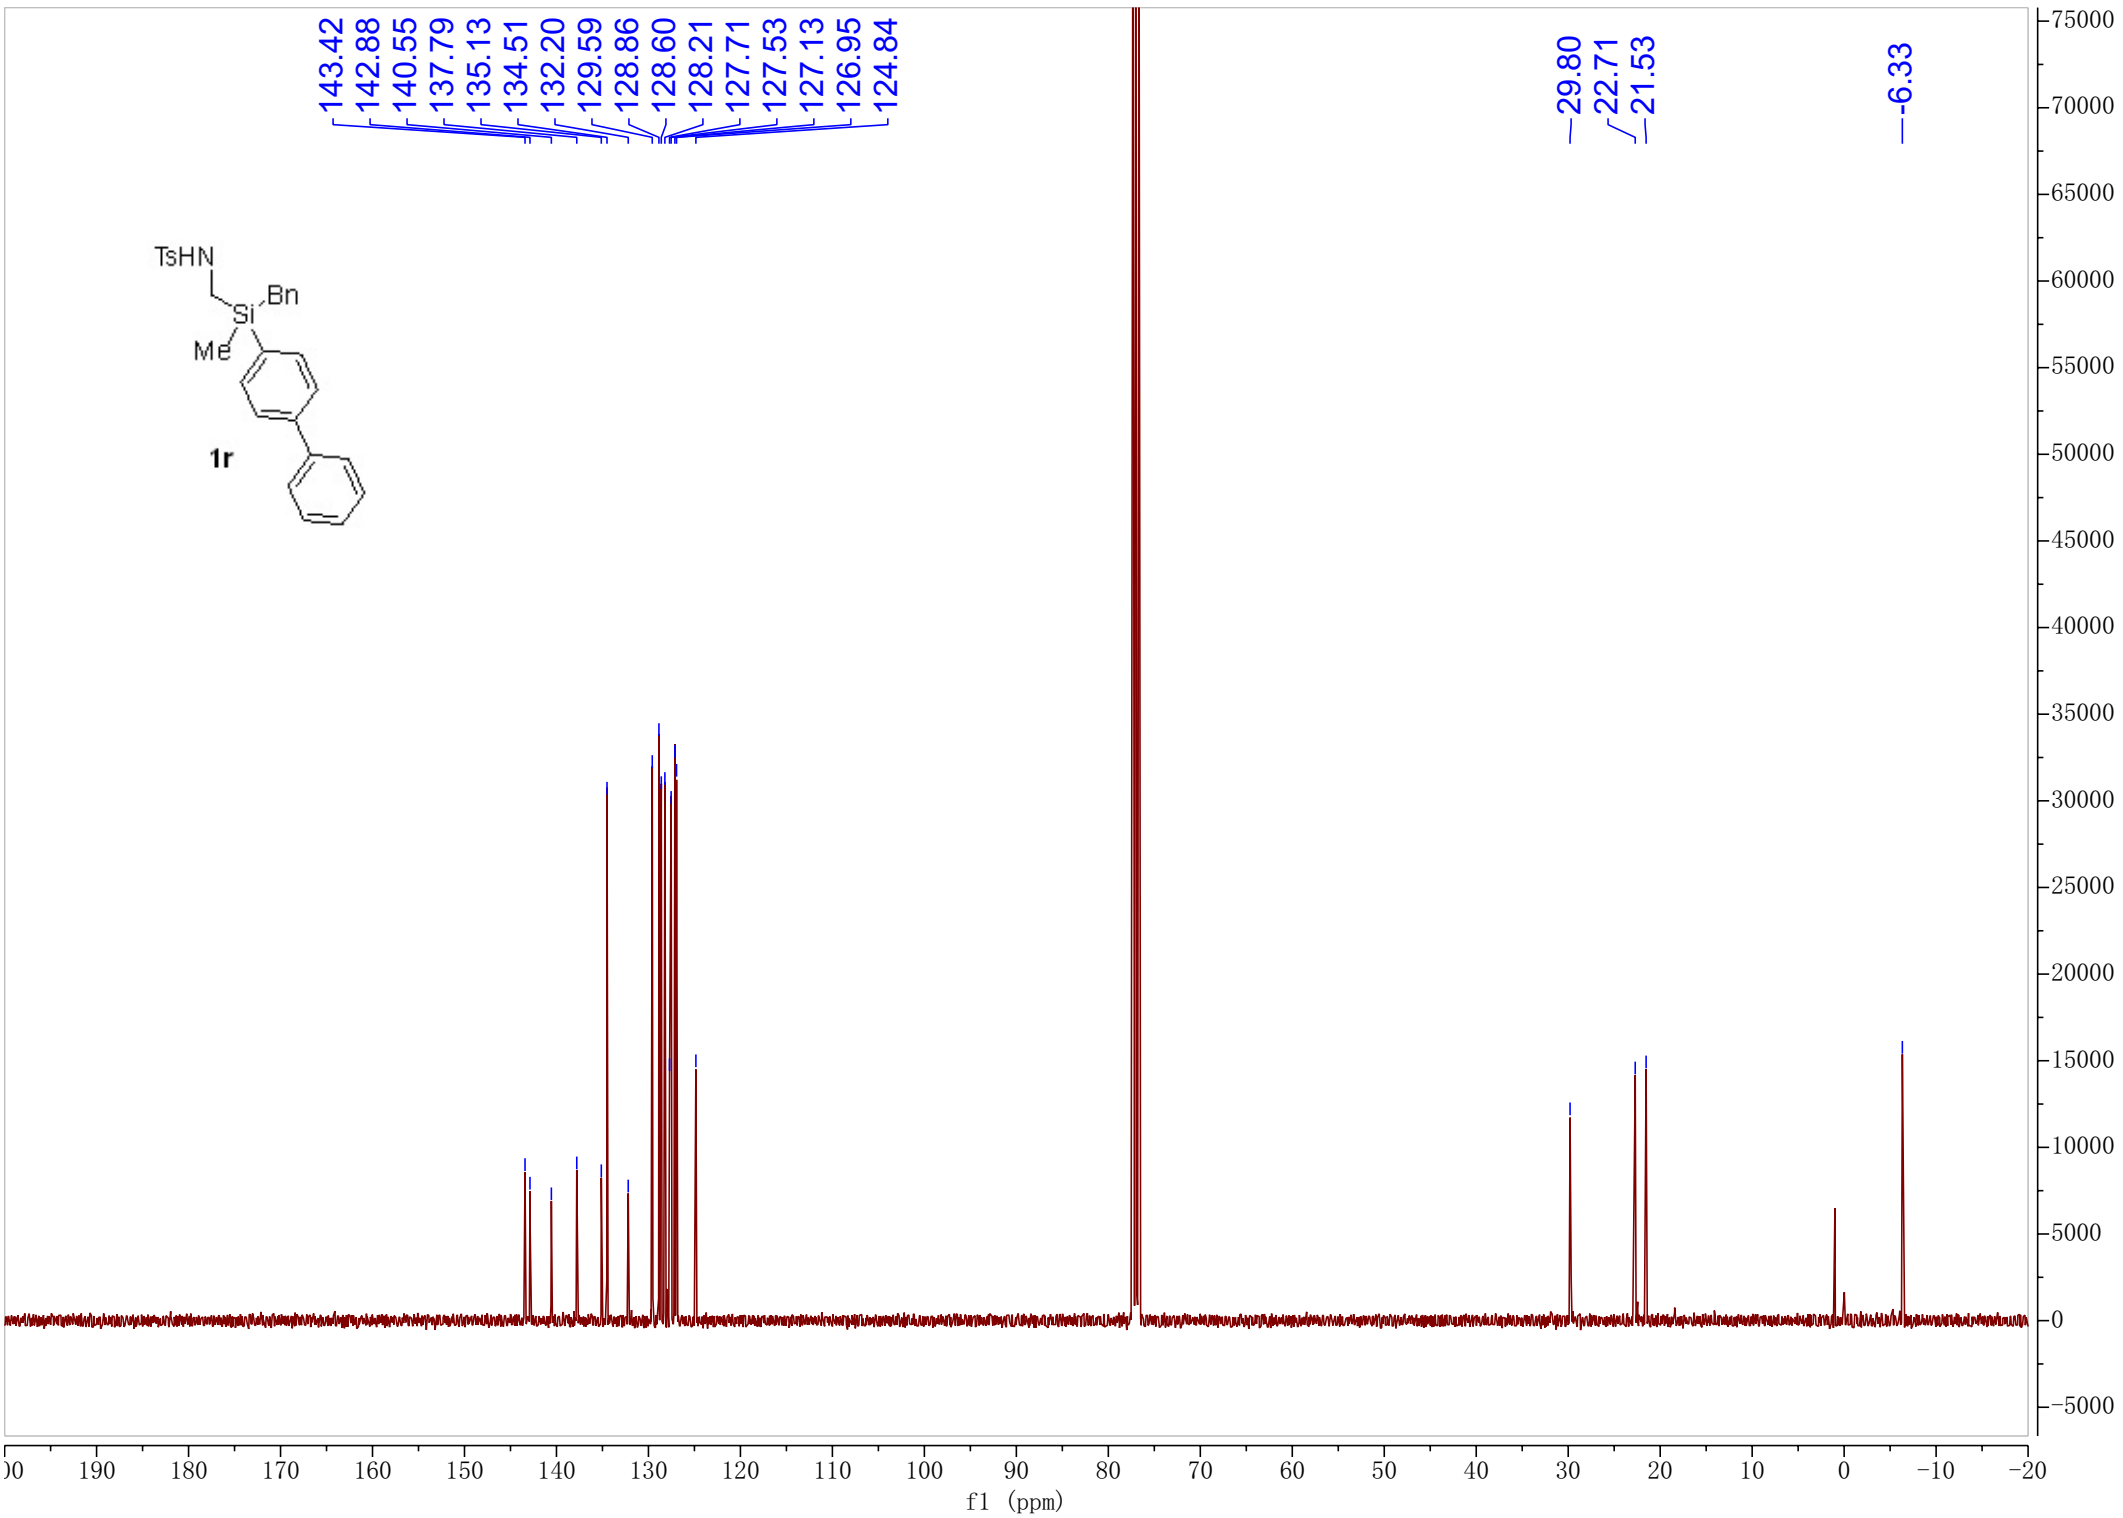

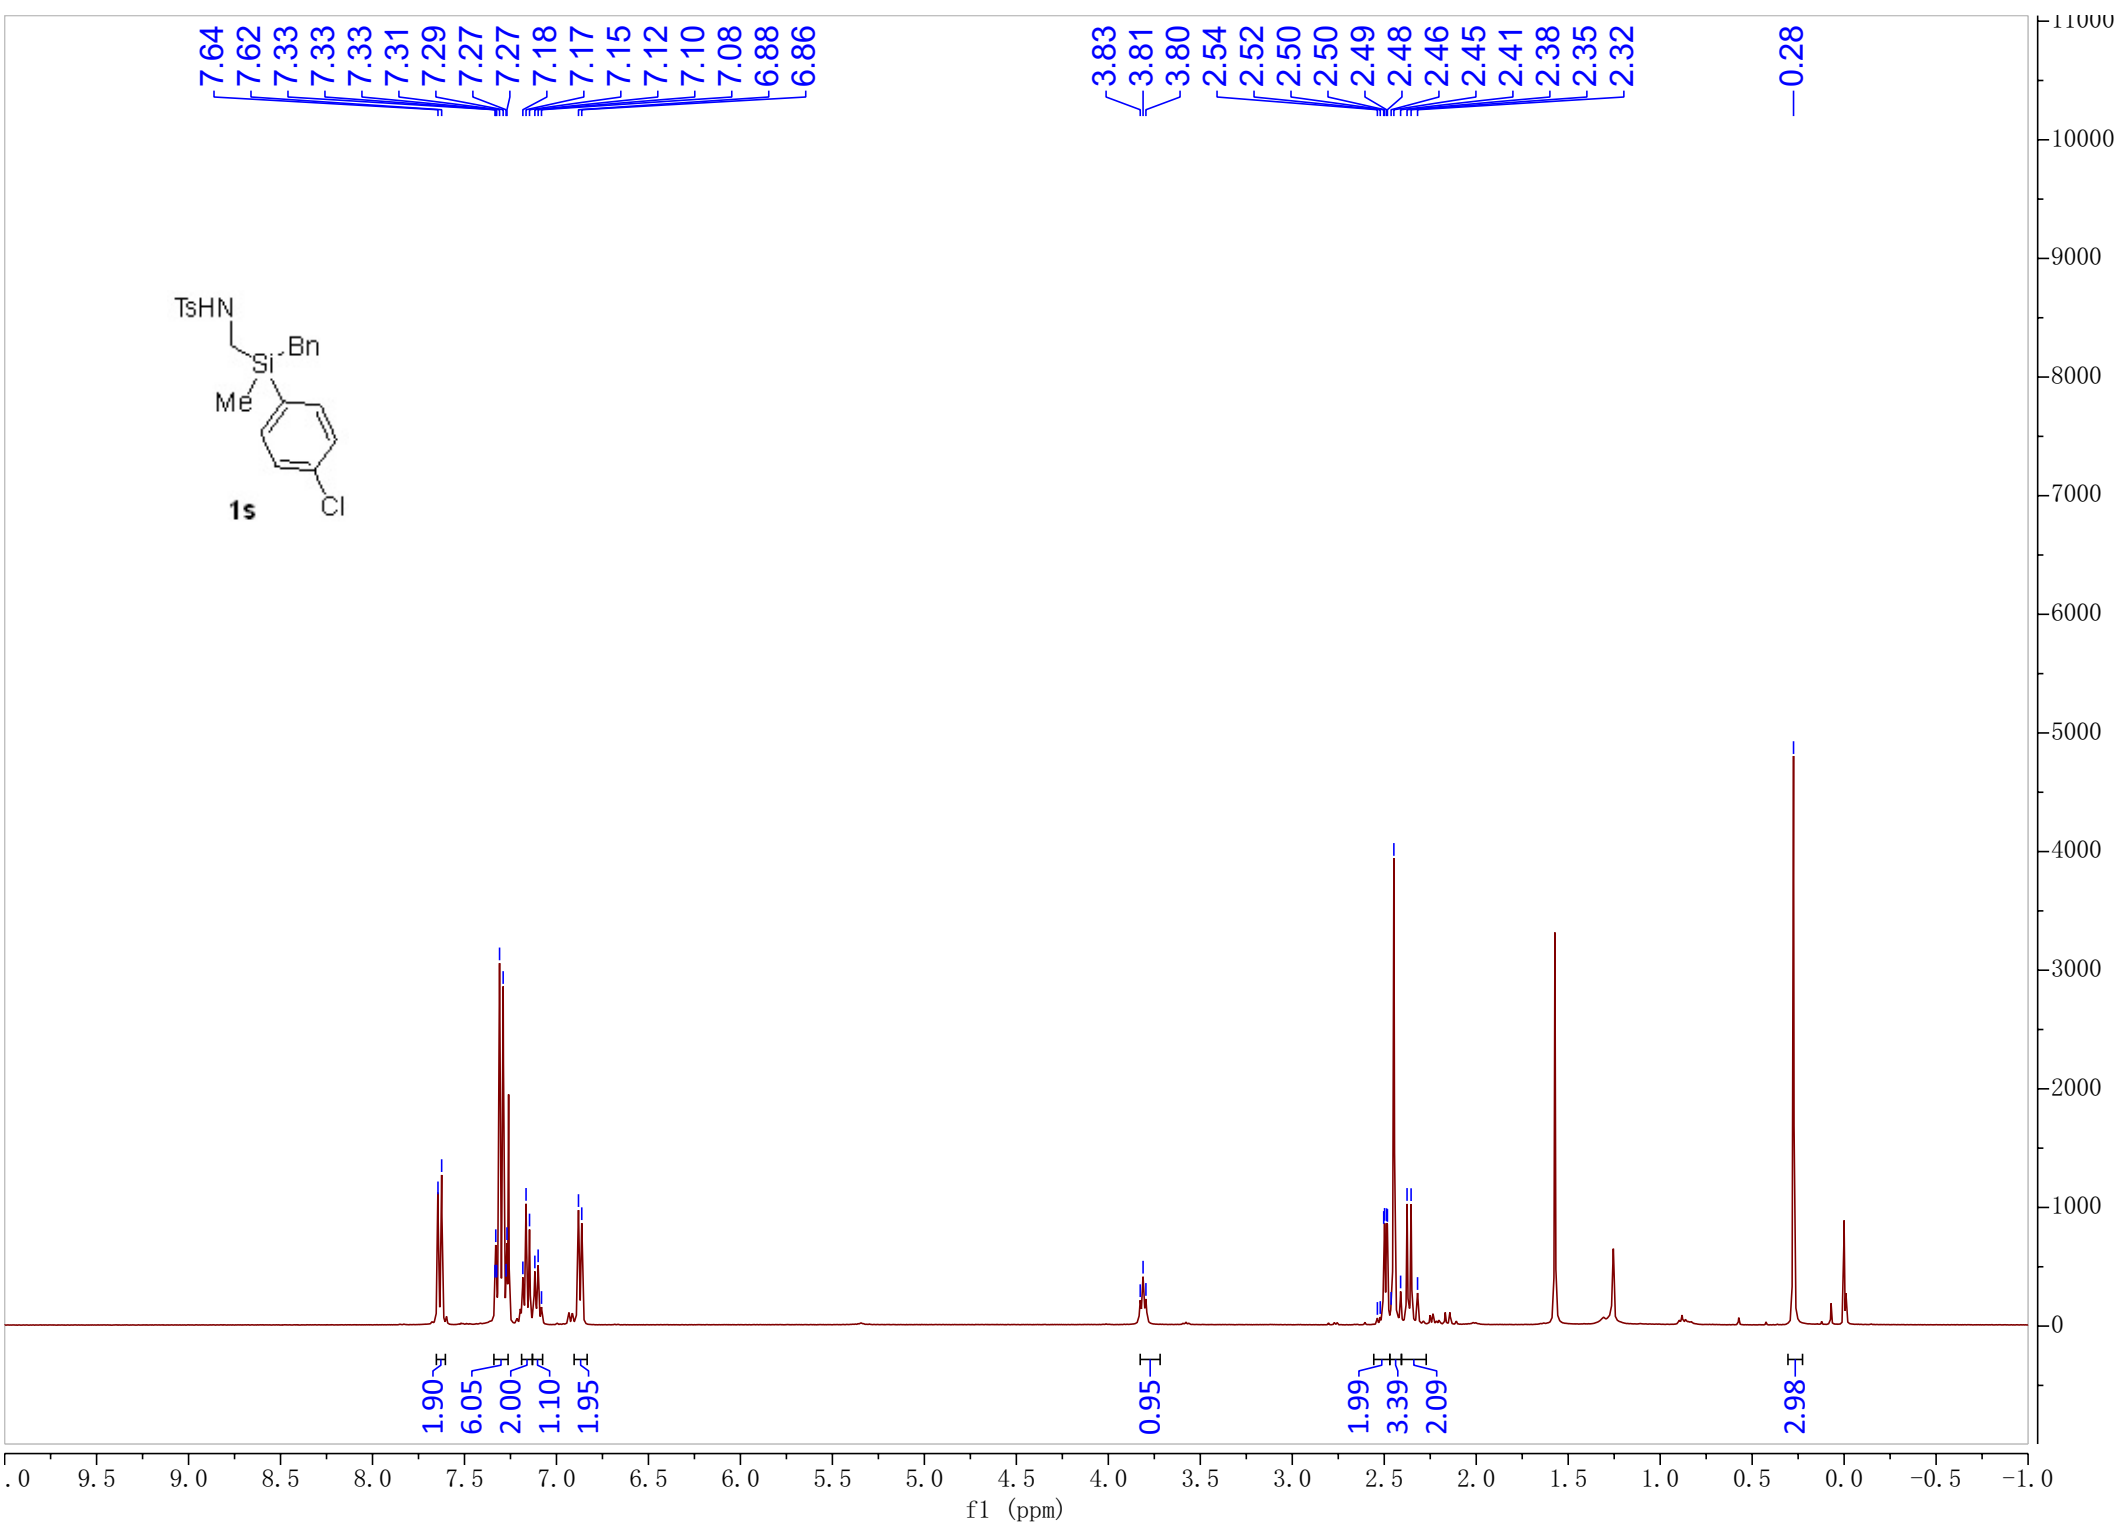

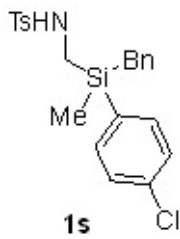

143.52  
137.43  
136.59  
135.34  
135.05  
131.92  
129.62  
128.64  
128.51  
128.15  
127.49  
124.95

-29.70  
-22.66  
-21.54

-6.37

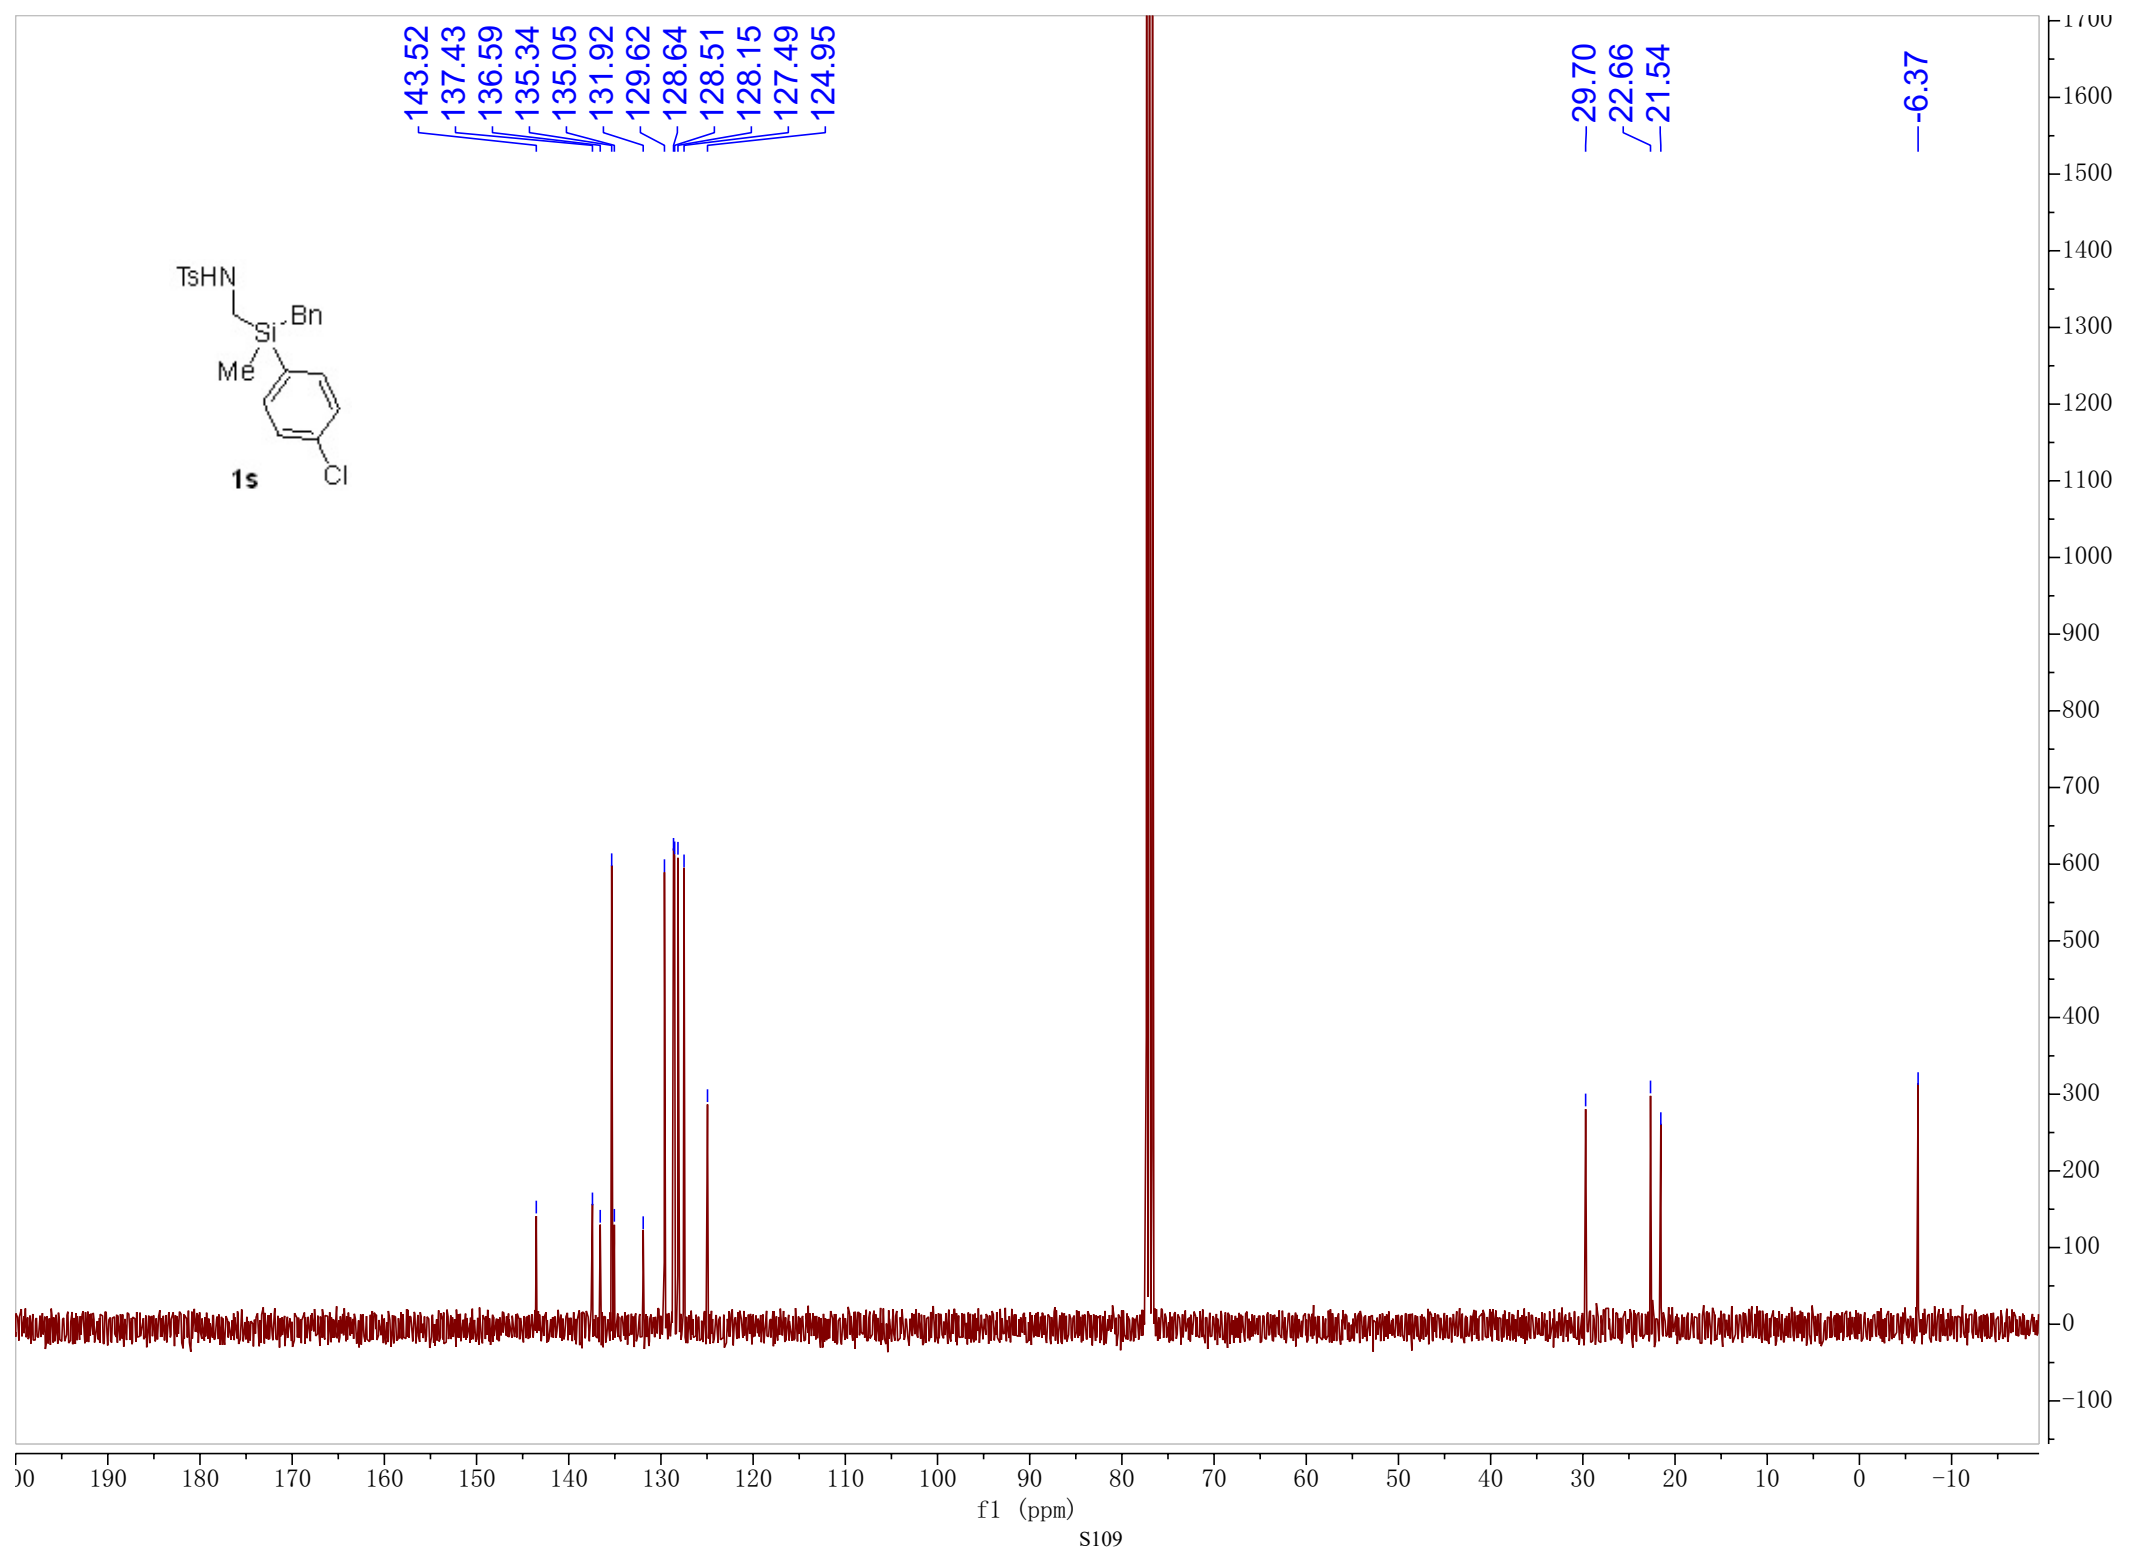

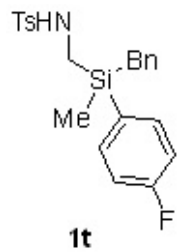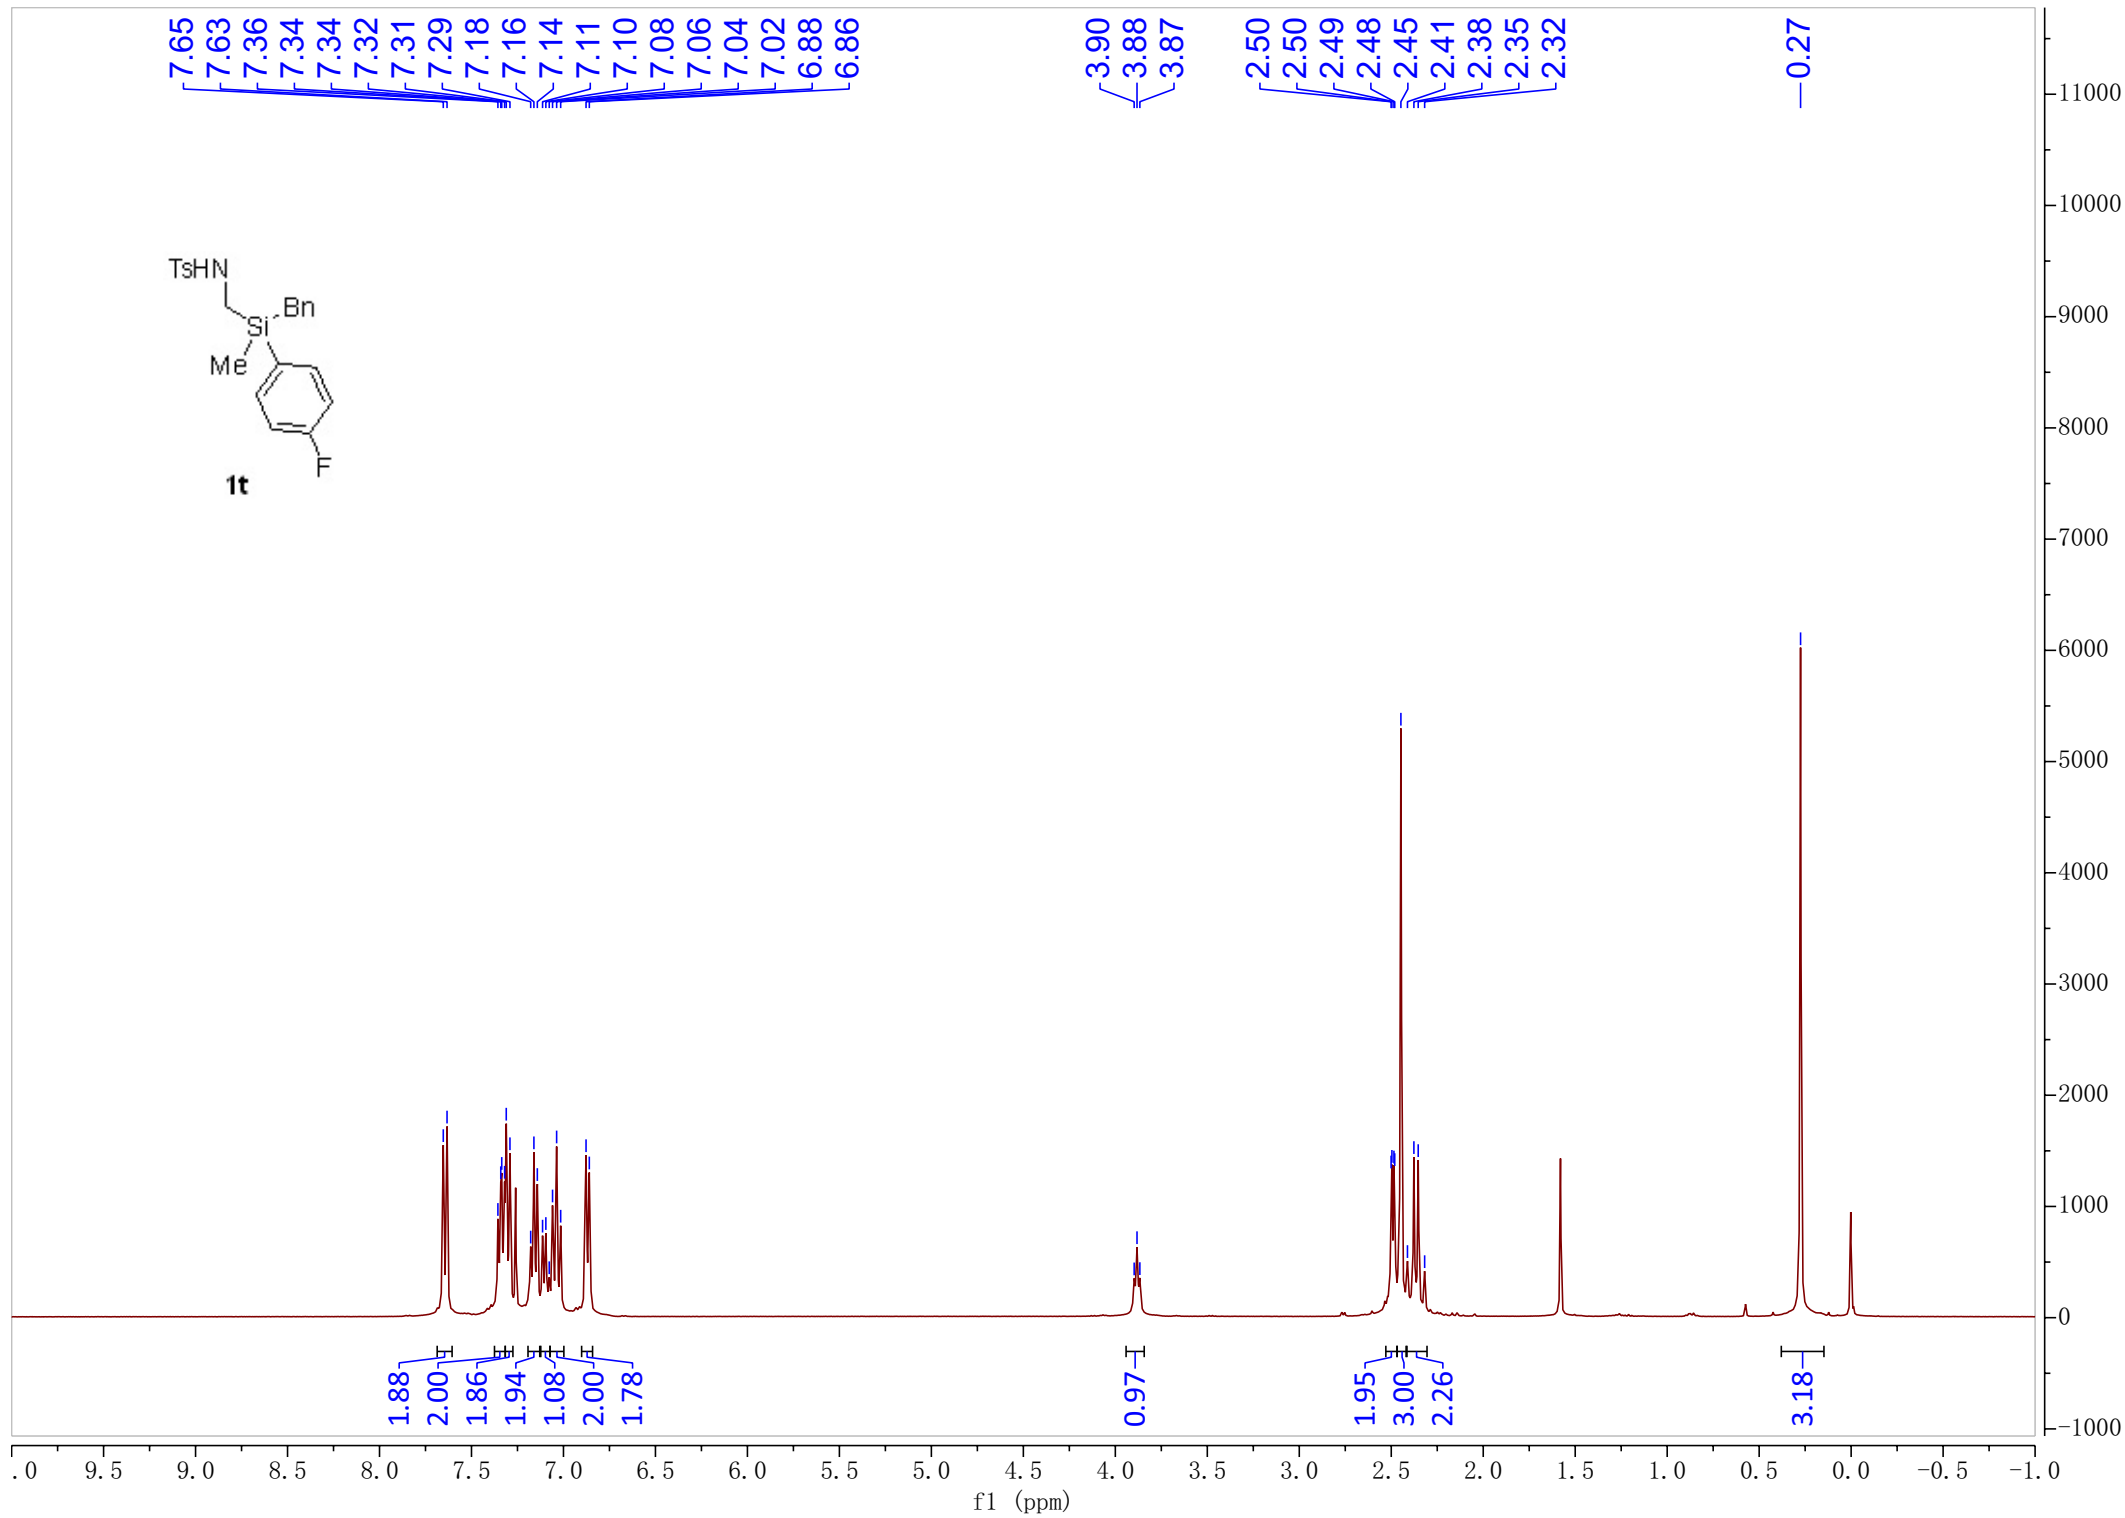

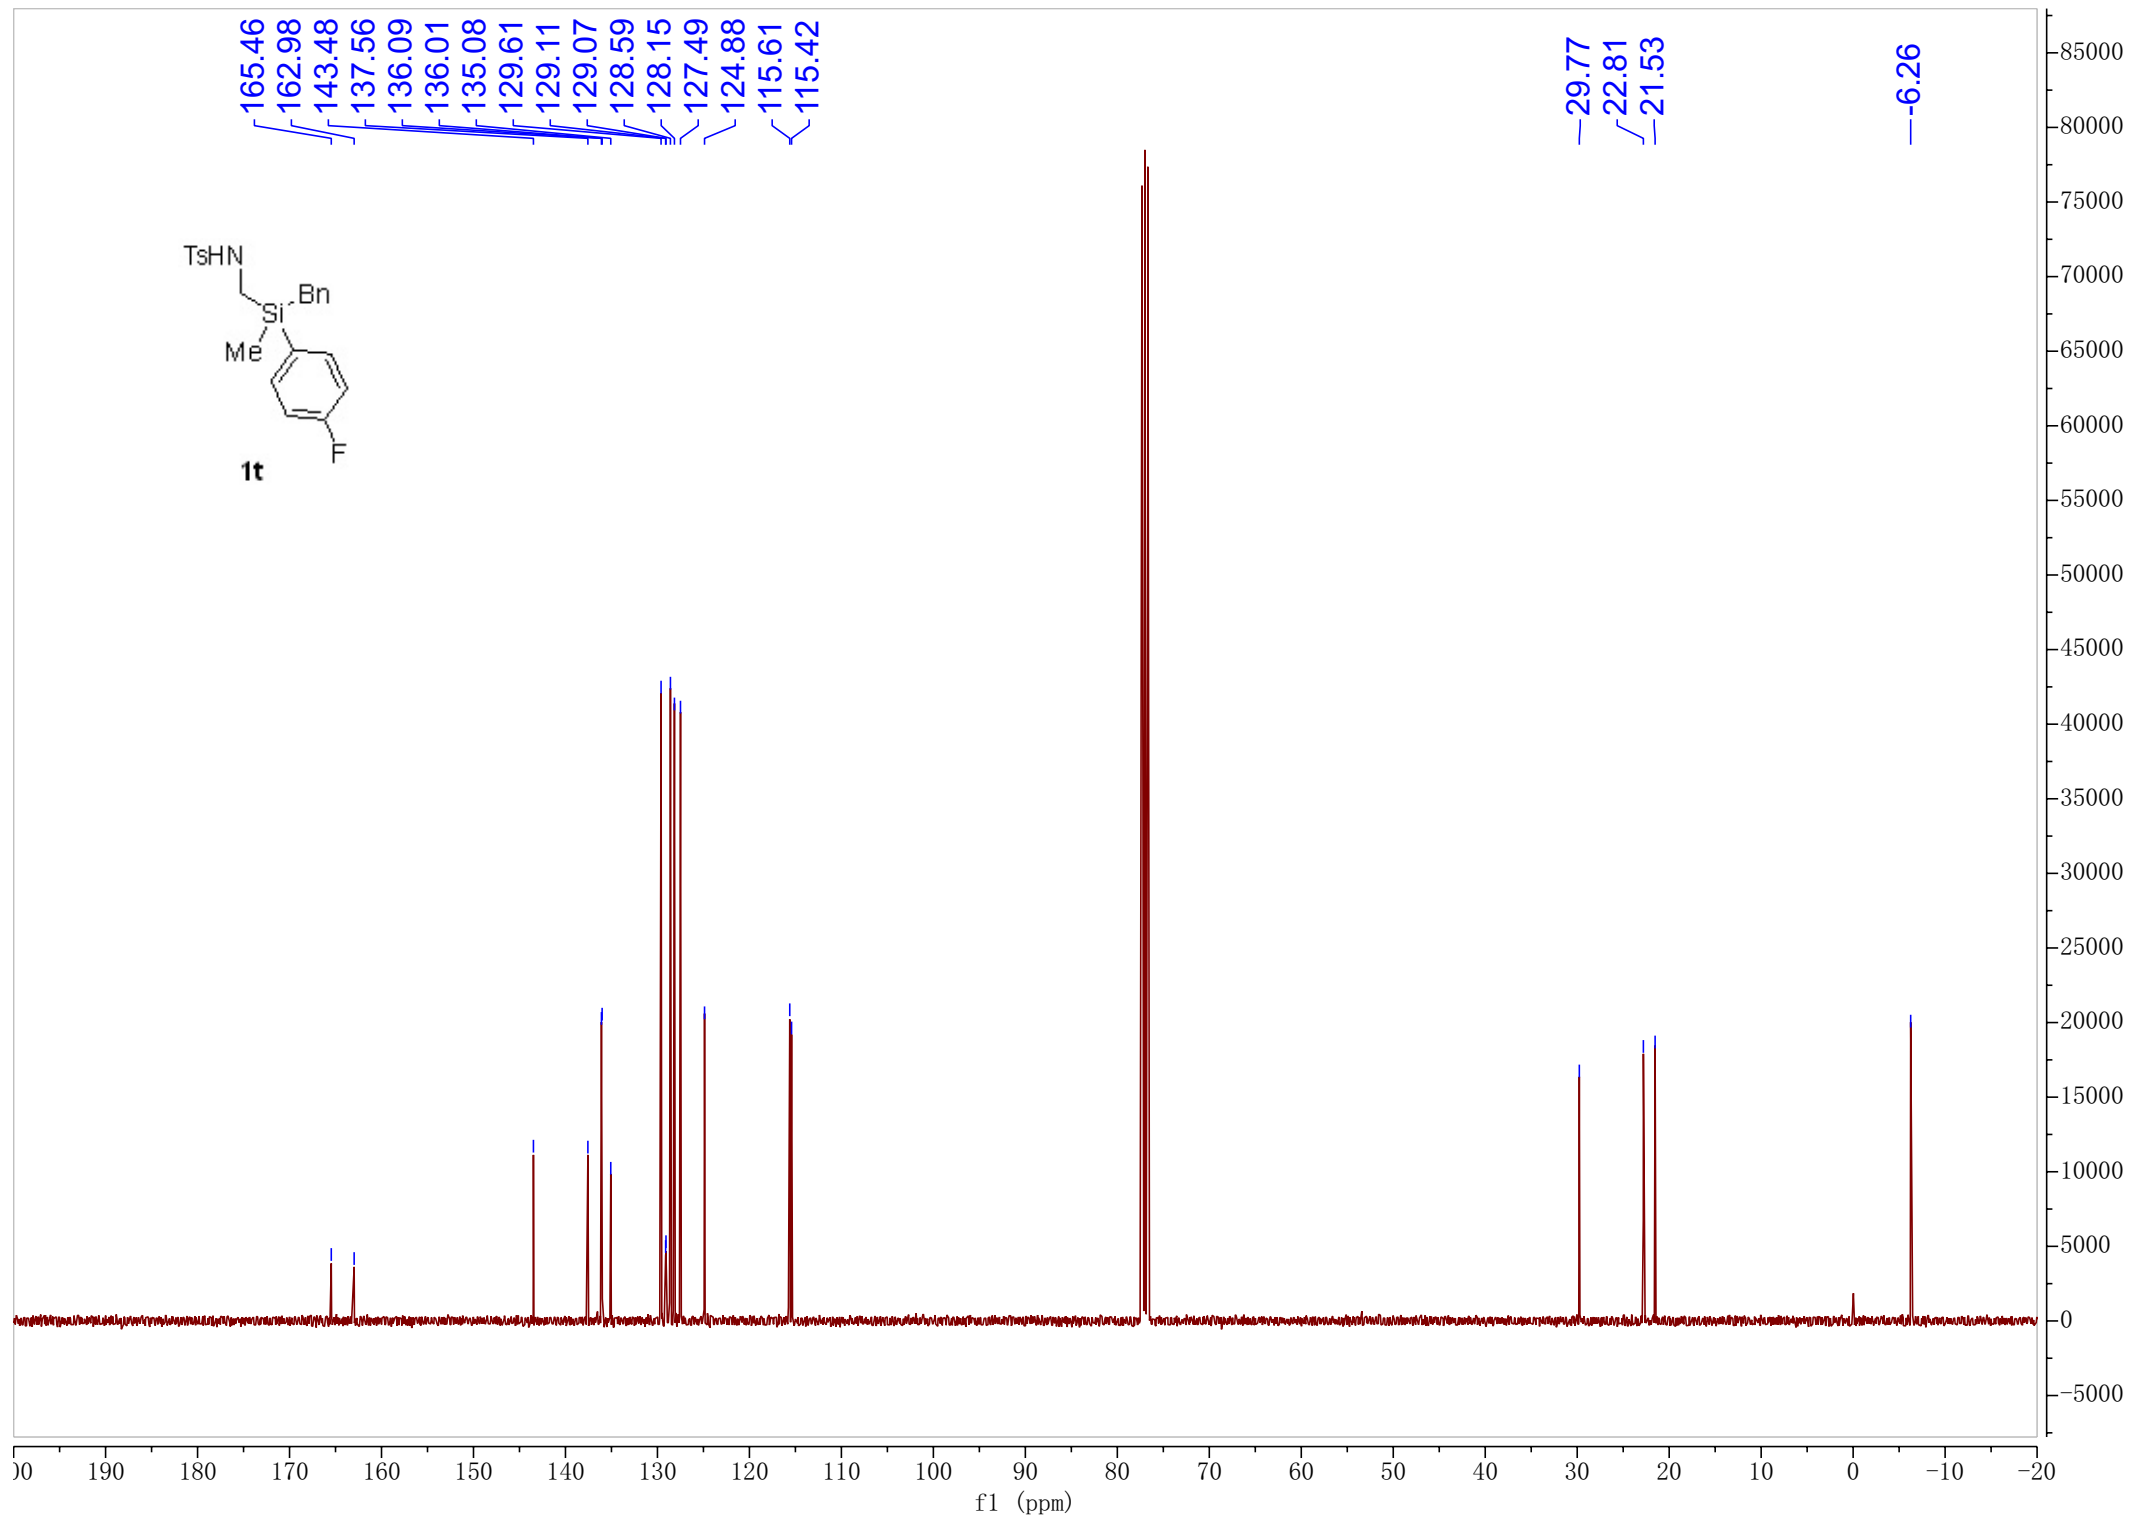

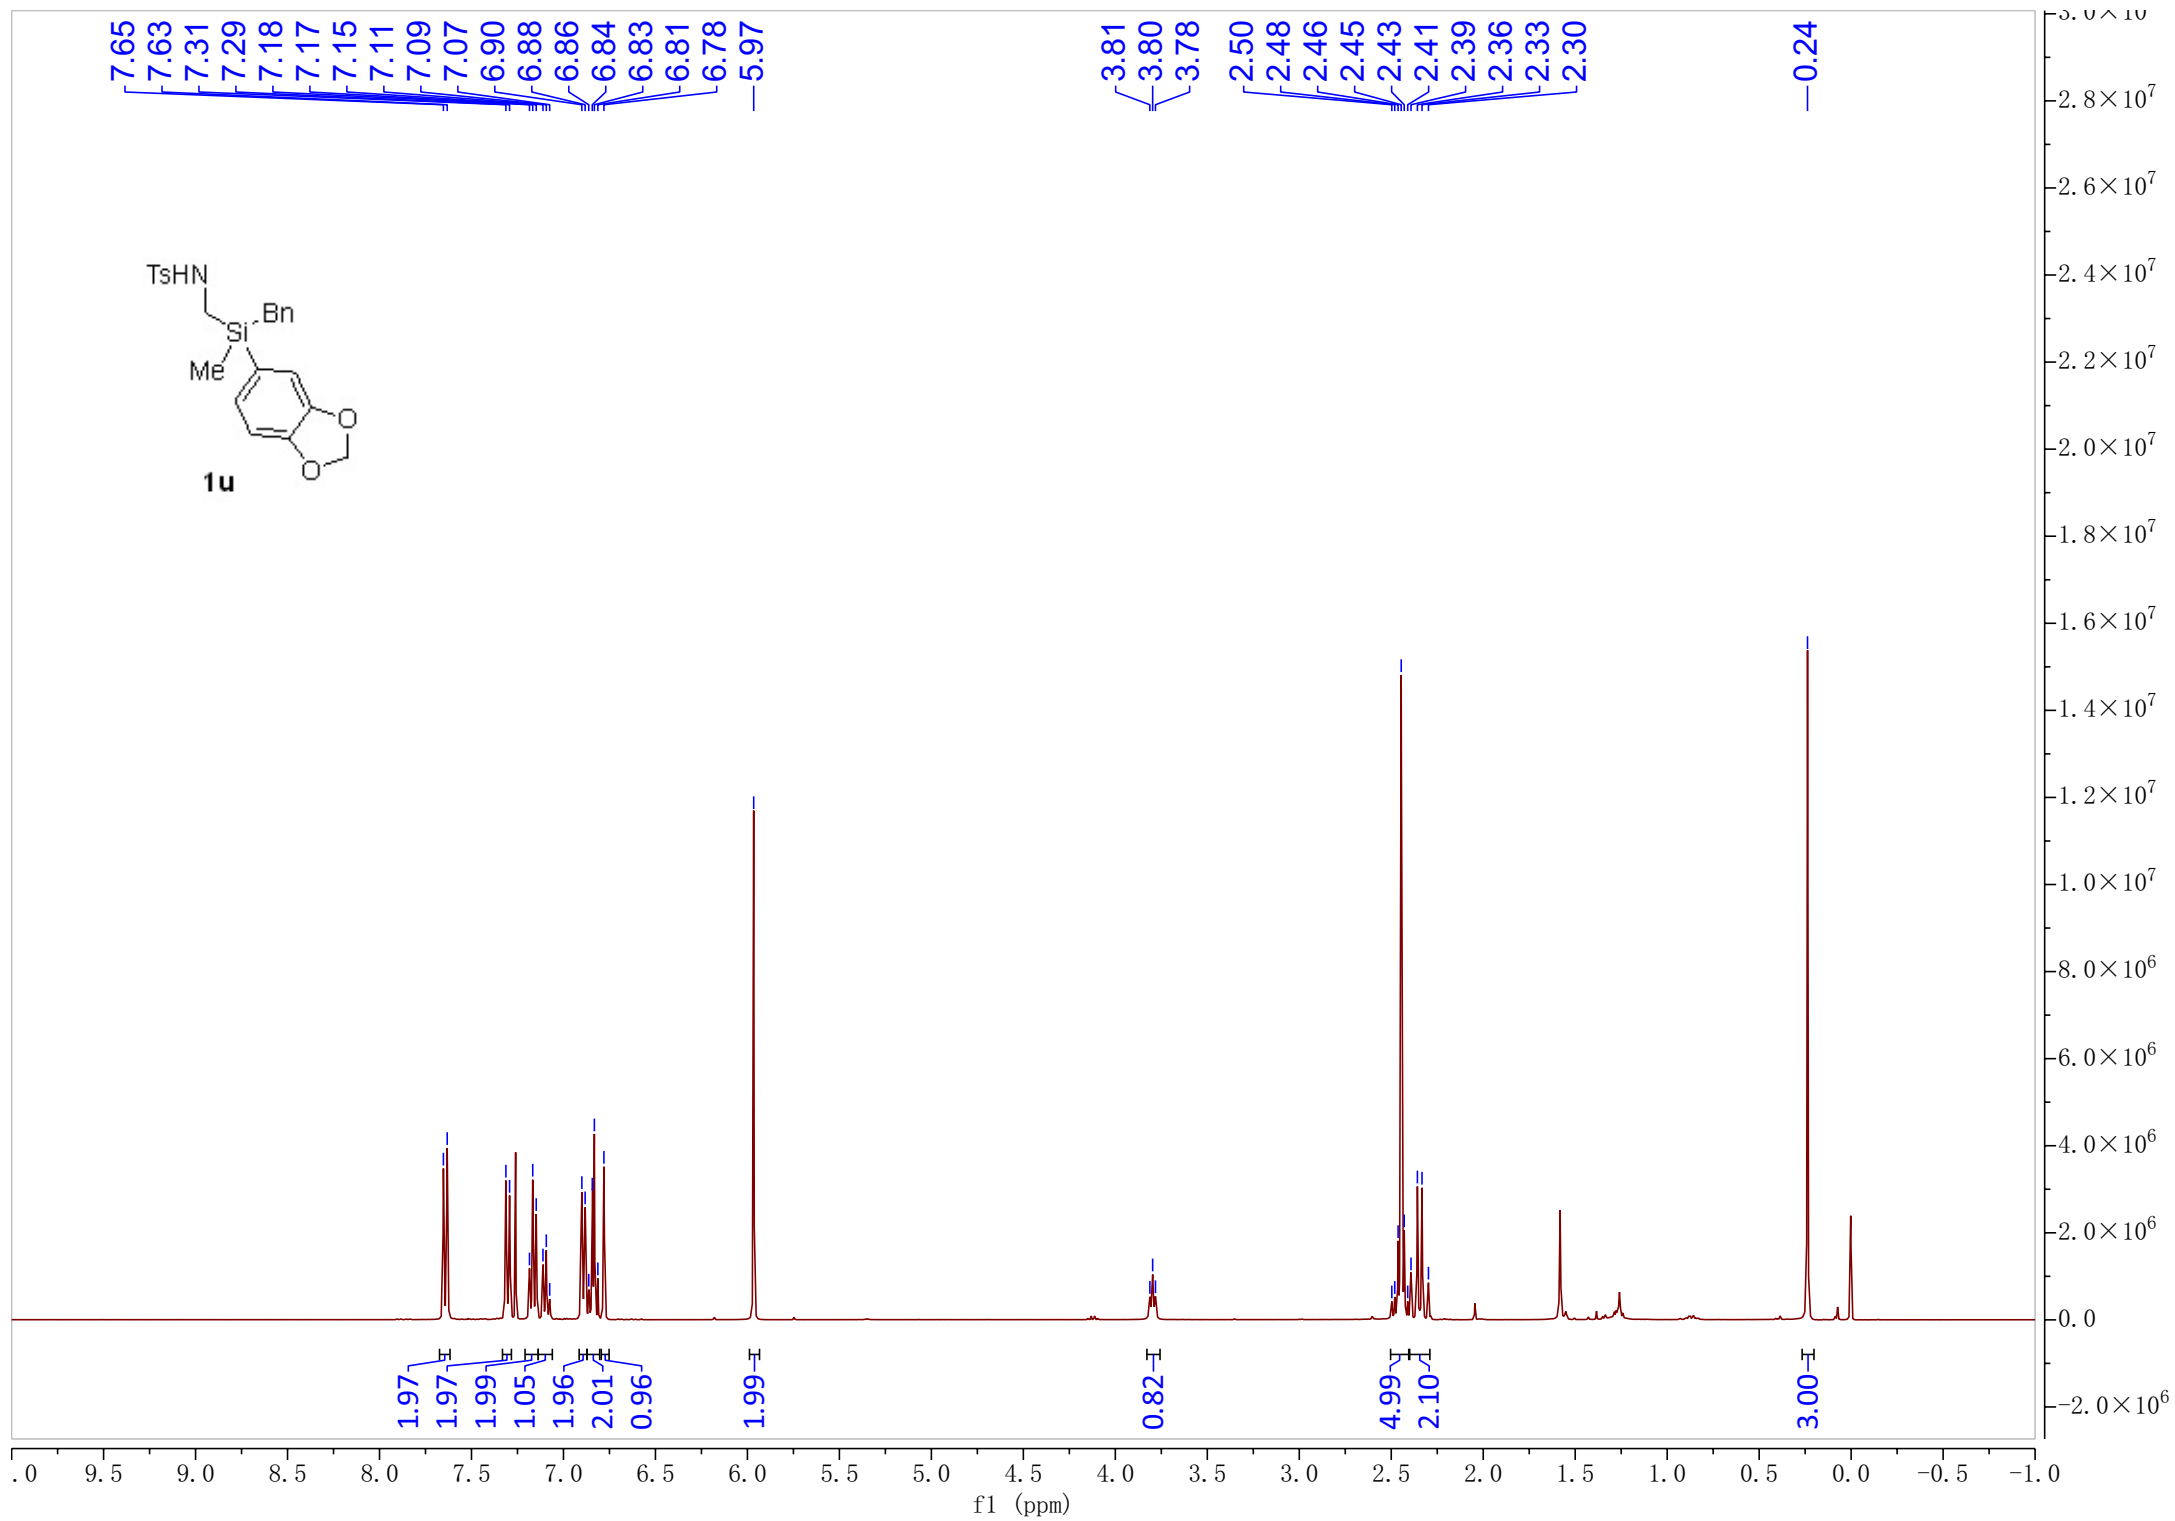



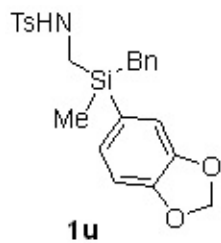

149.34  
147.79  
143.42  
137.75  
135.08  
129.59  
128.55  
128.35  
128.17  
127.51  
126.16  
124.80  
— 113.06  
— 109.01  
— 100.81

— 29.83  
— 22.85  
— 21.53  
  
— 6.23

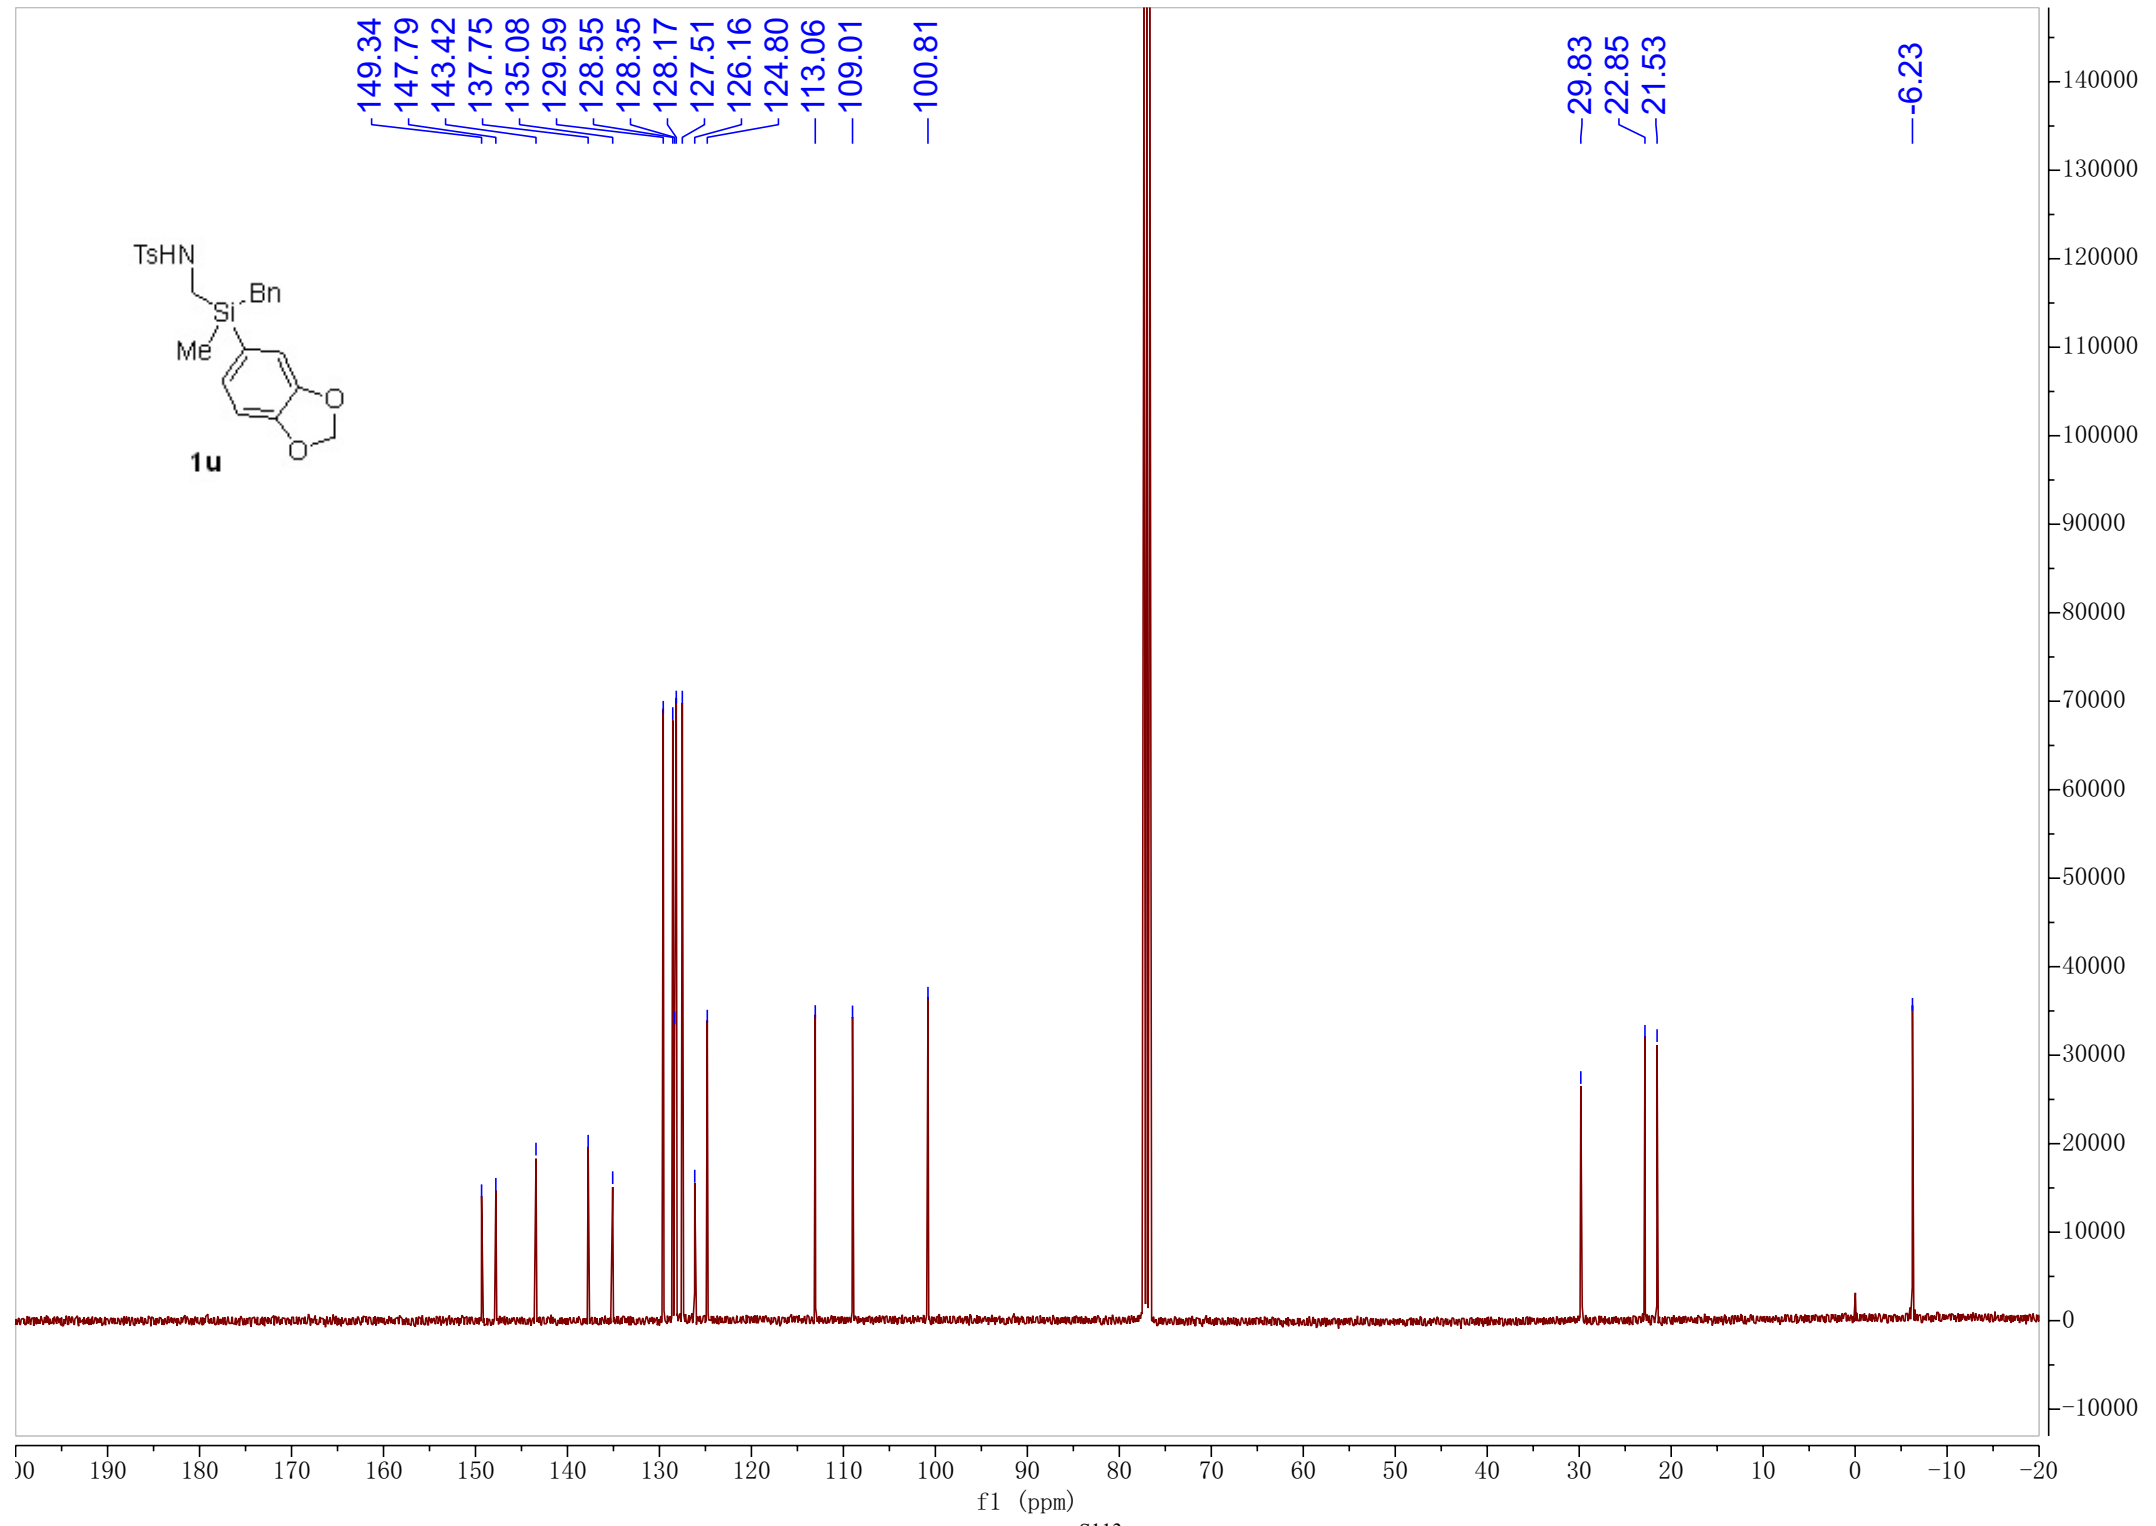

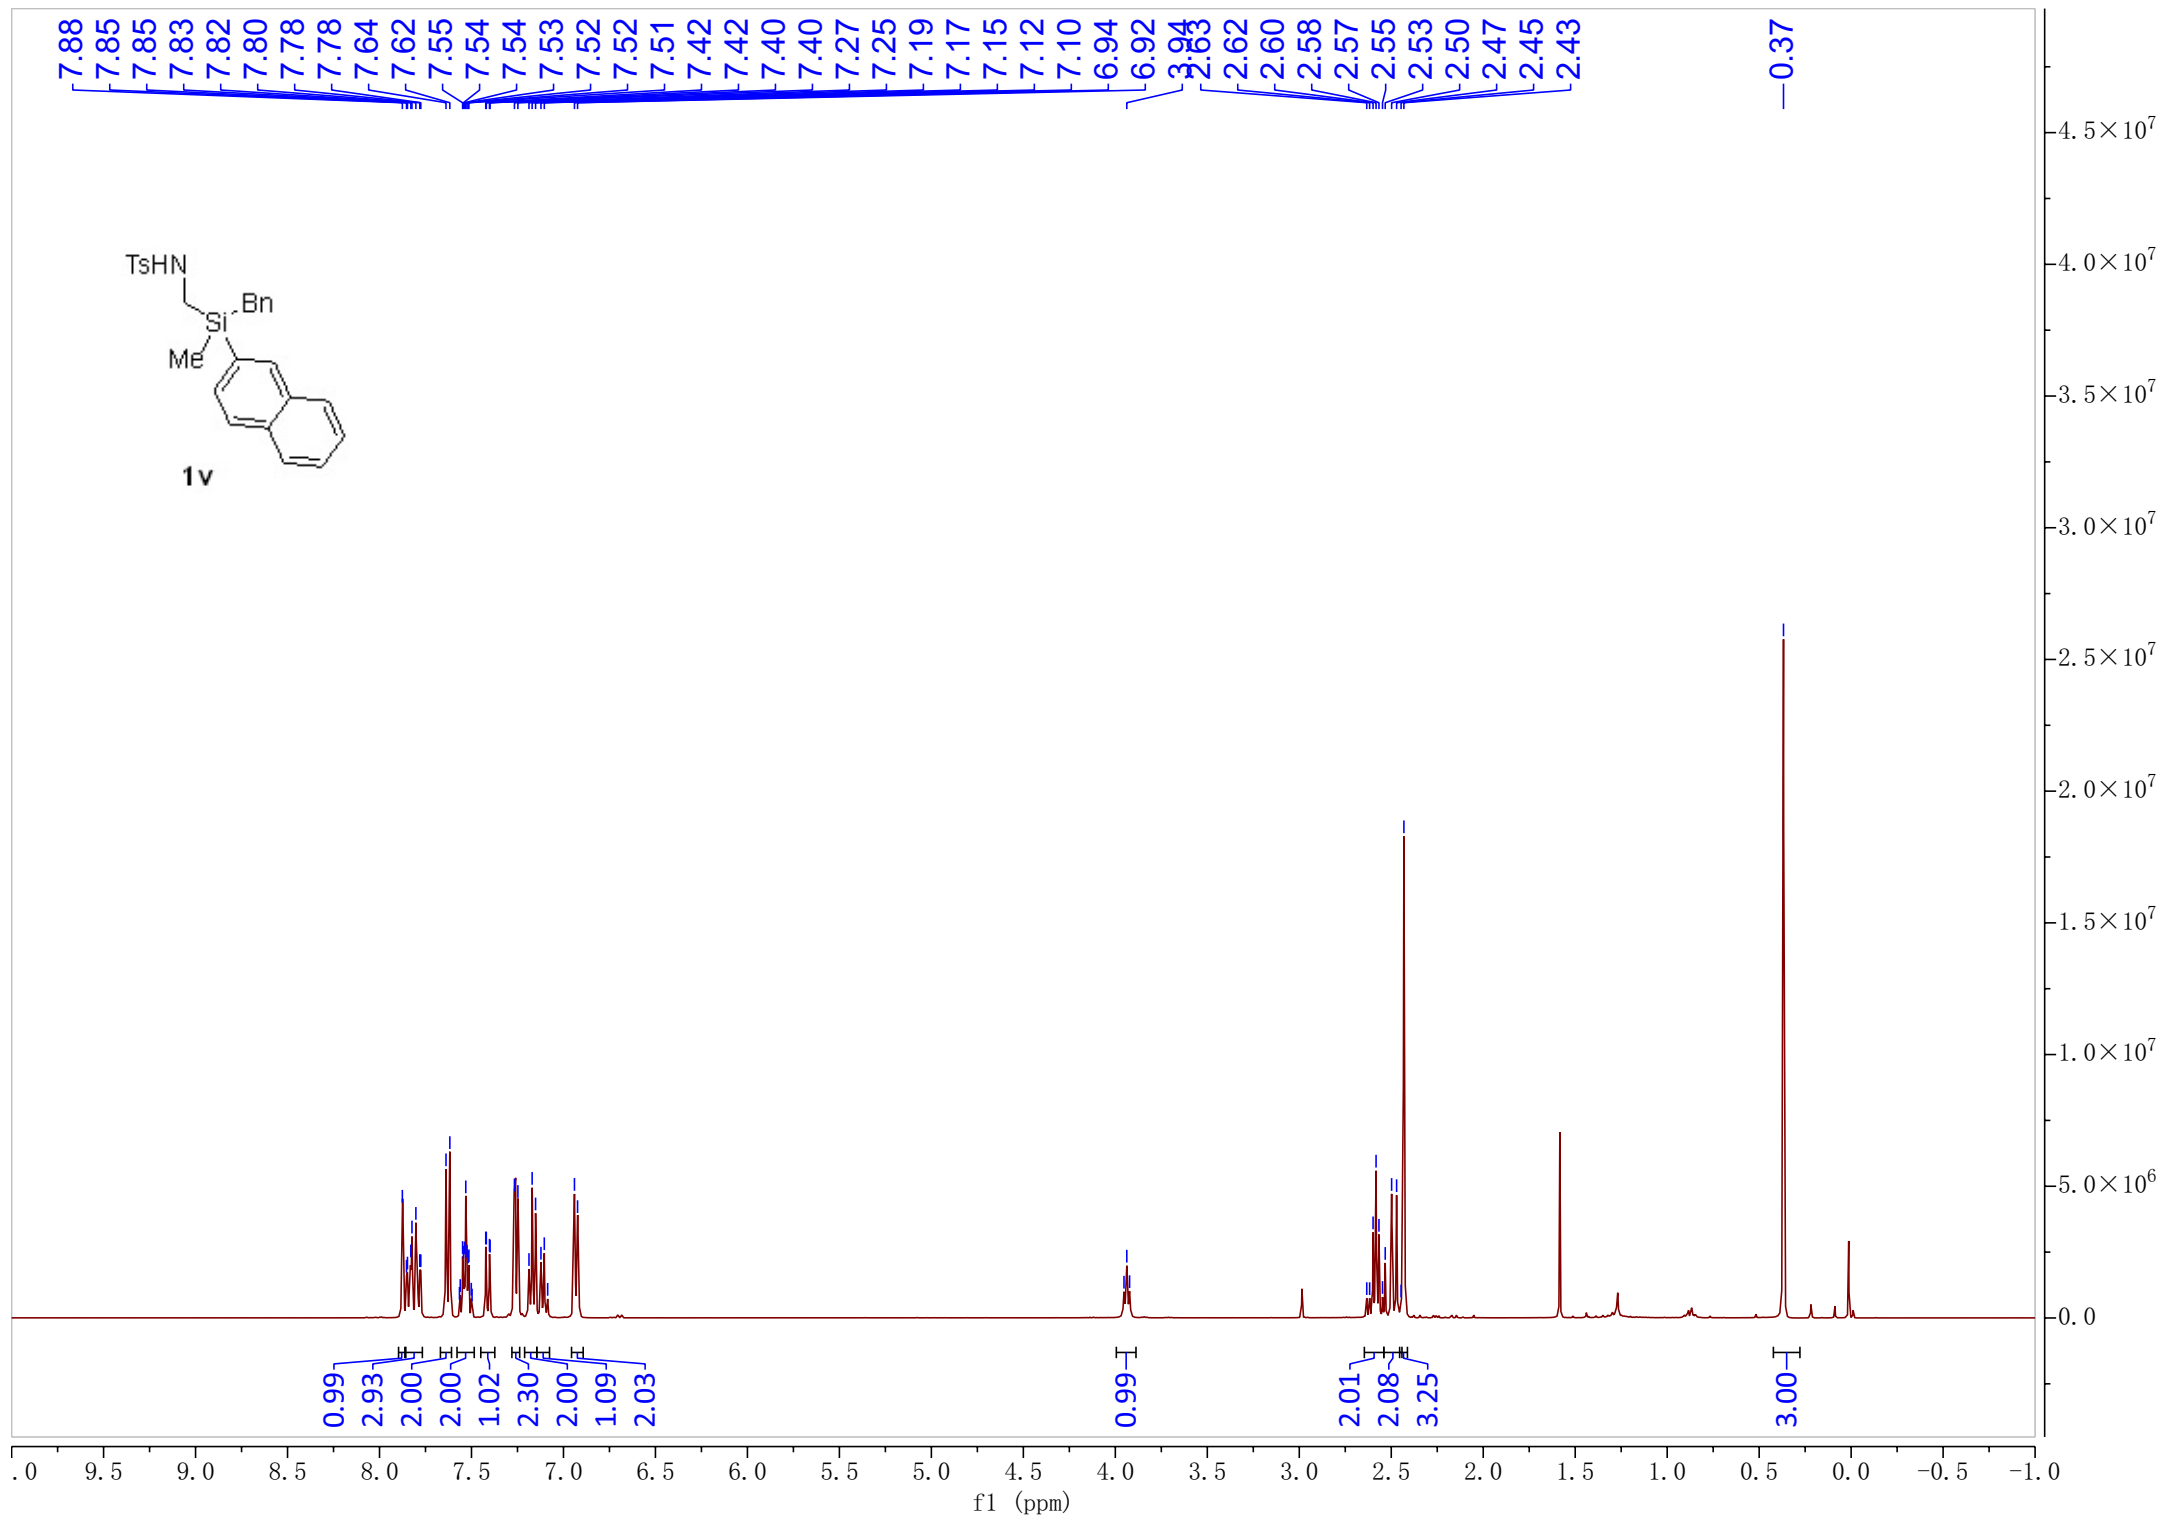

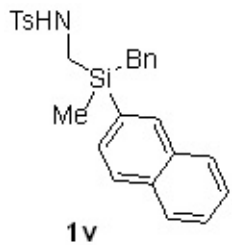

143.36  
137.78  
135.25  
135.10  
134.04  
132.79  
130.94  
129.56  
129.50  
128.57  
128.23  
128.10  
127.73  
127.60  
127.49  
126.99  
126.30  
124.81

-29.81  
22.67  
-21.51

-6.36

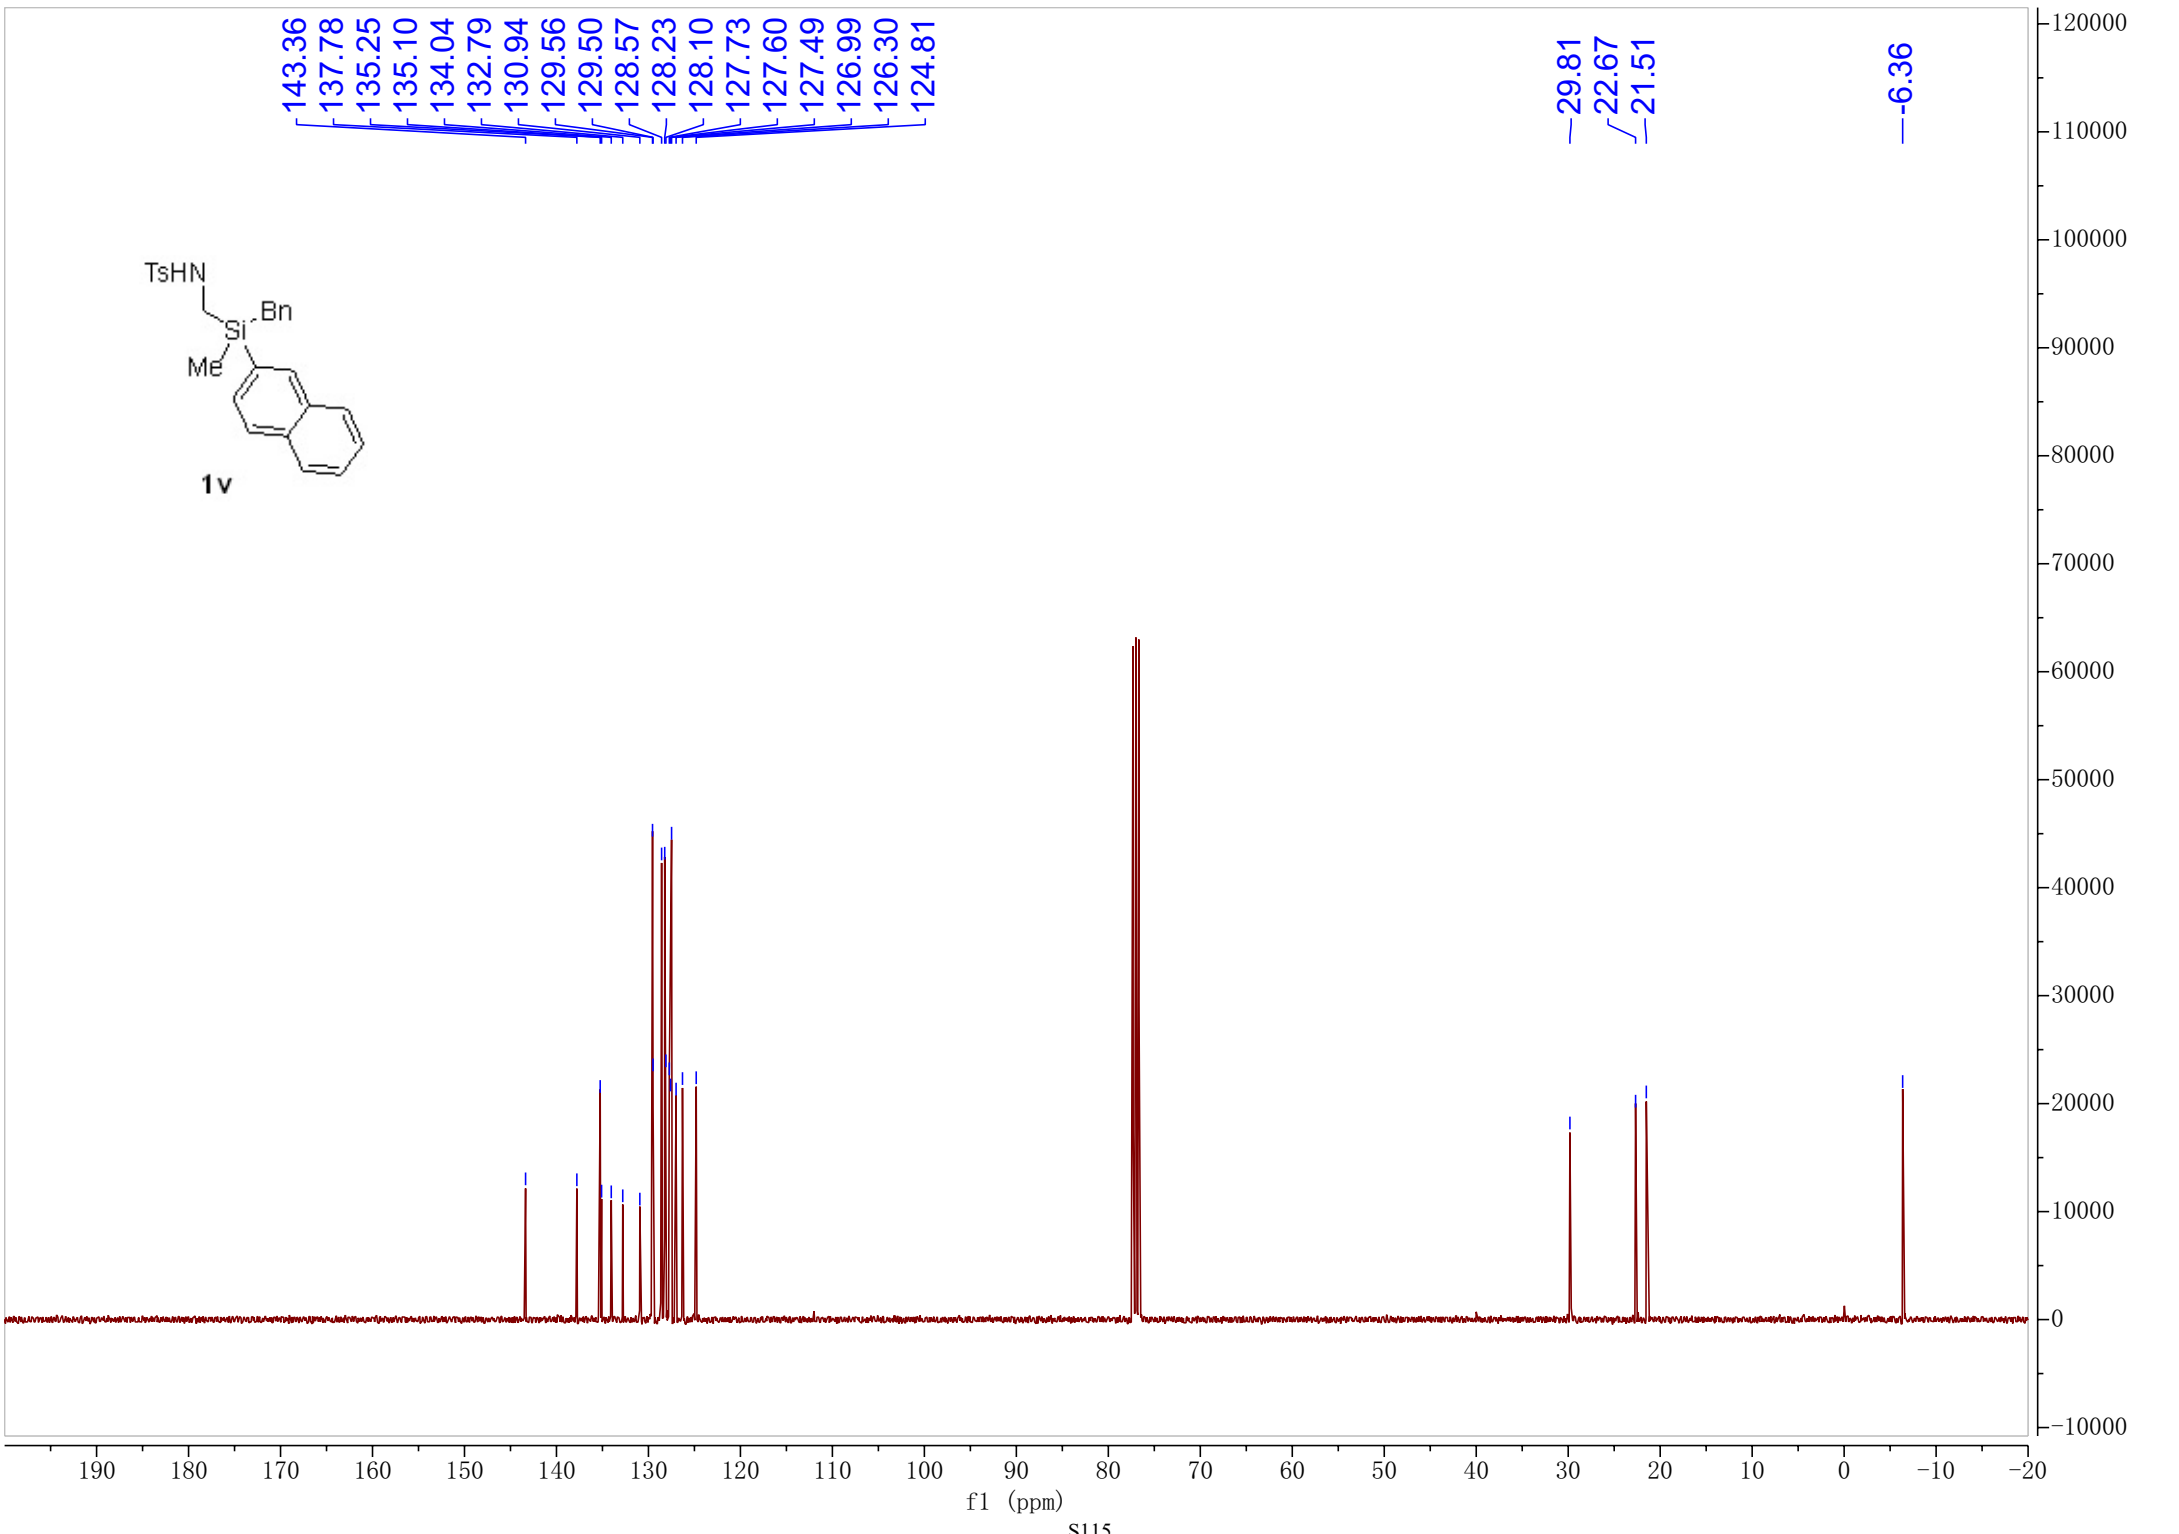

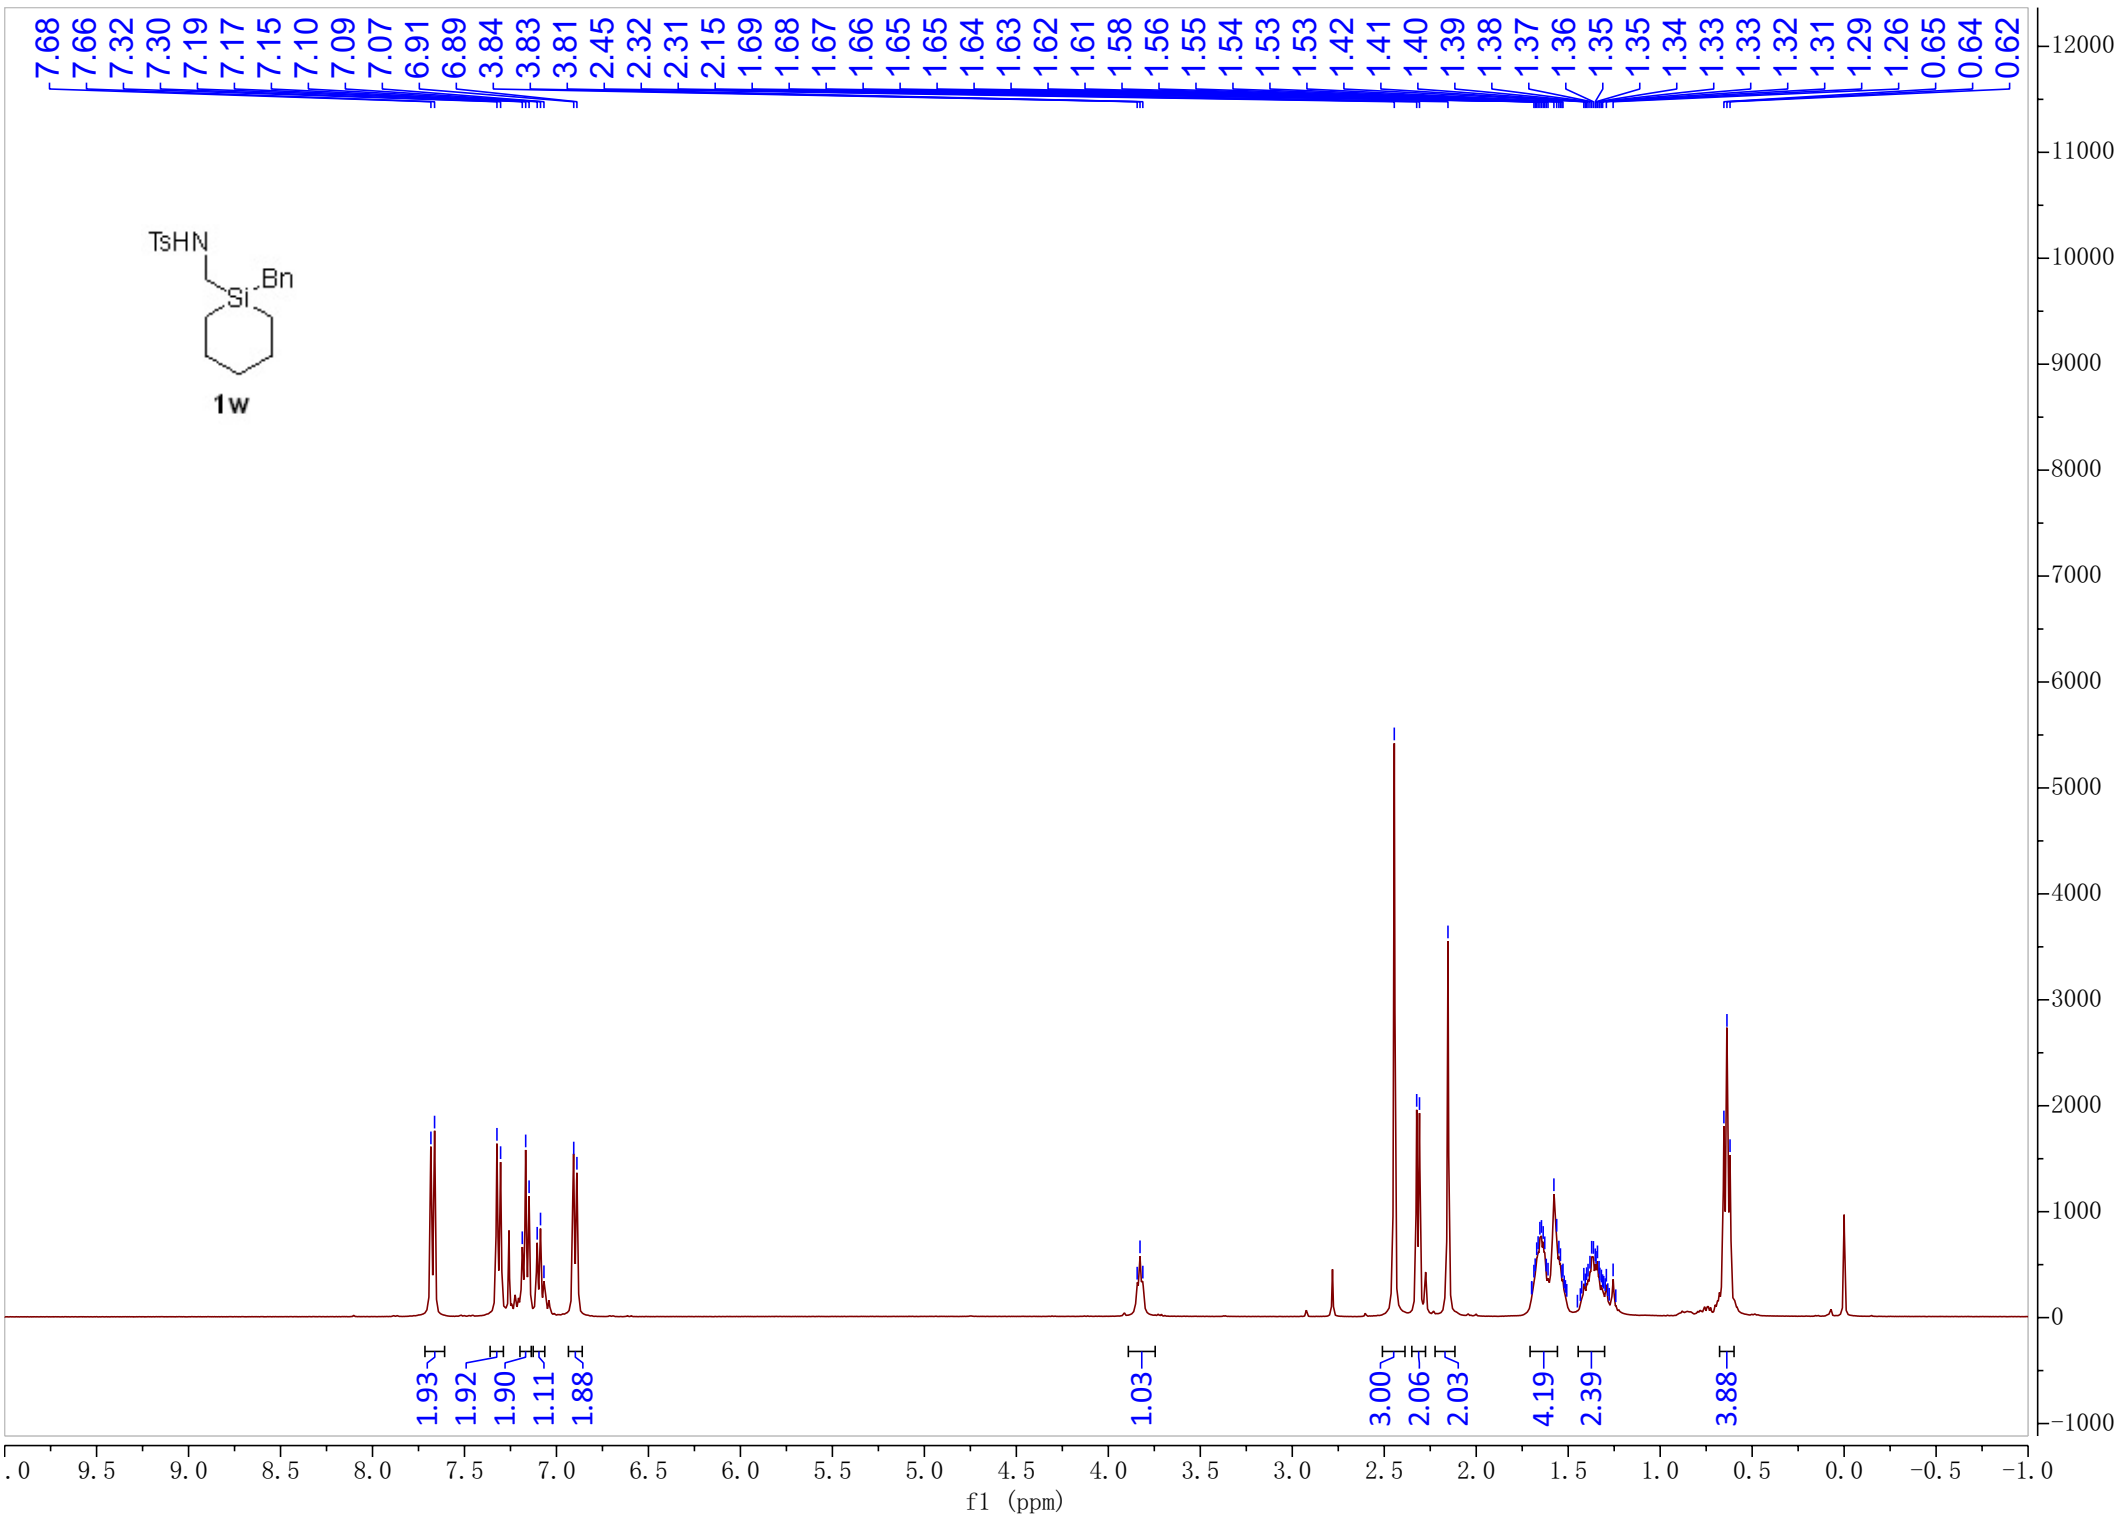

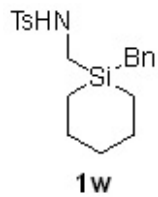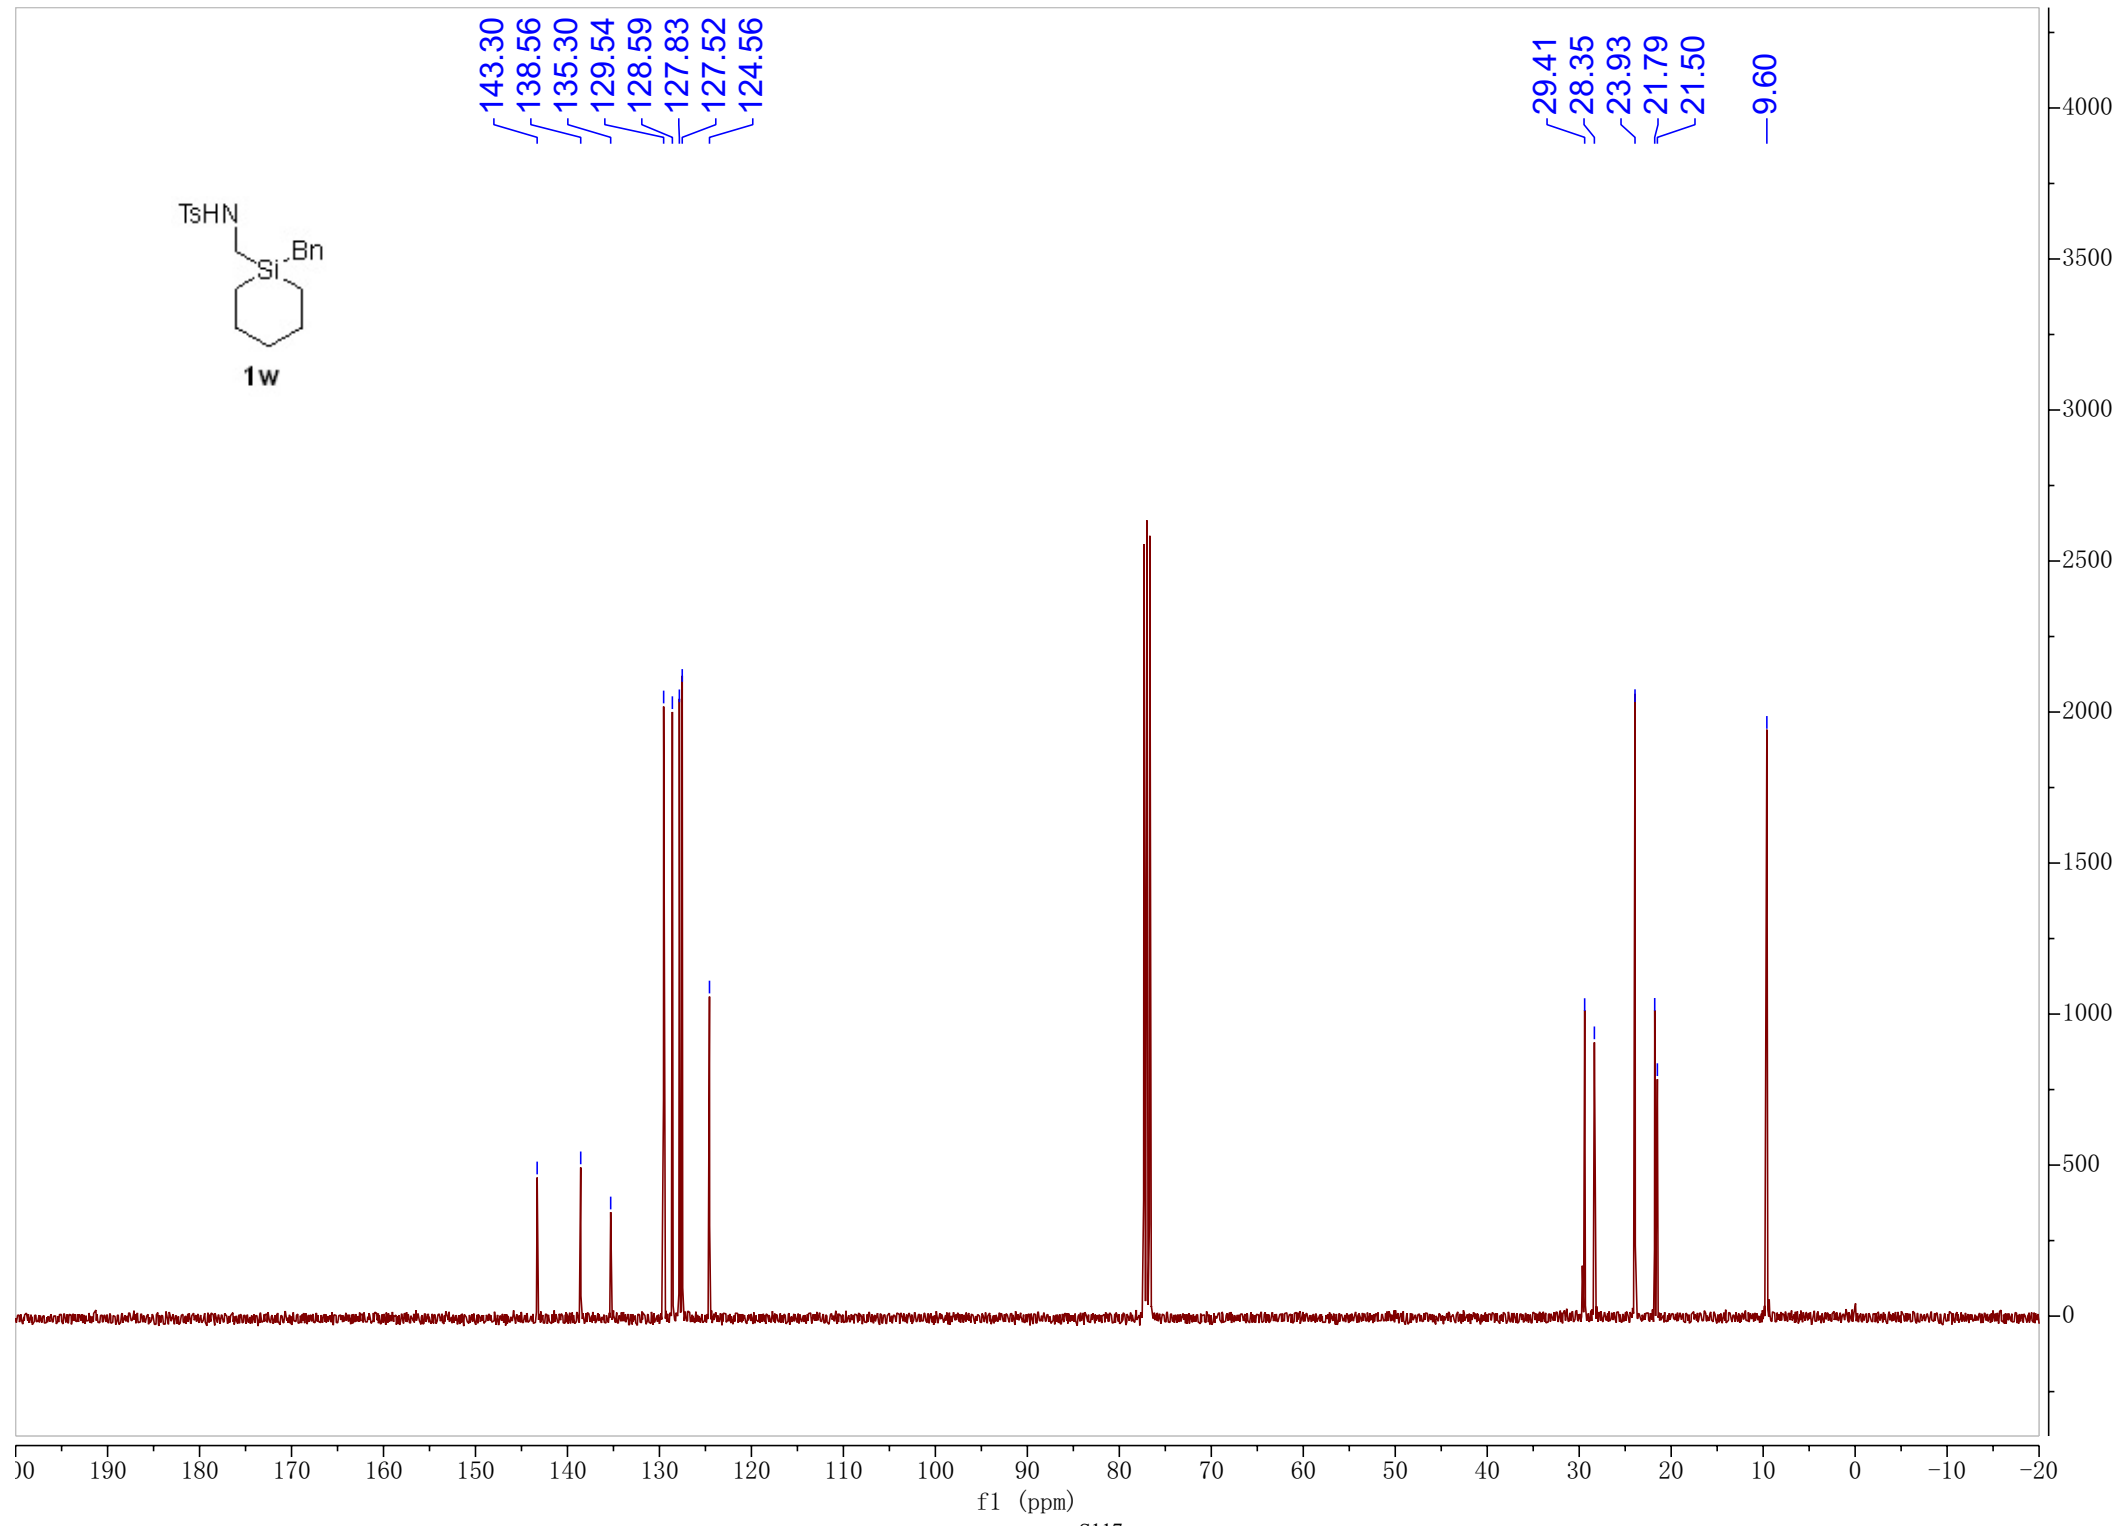

f1 (ppm)

S117

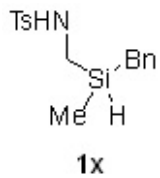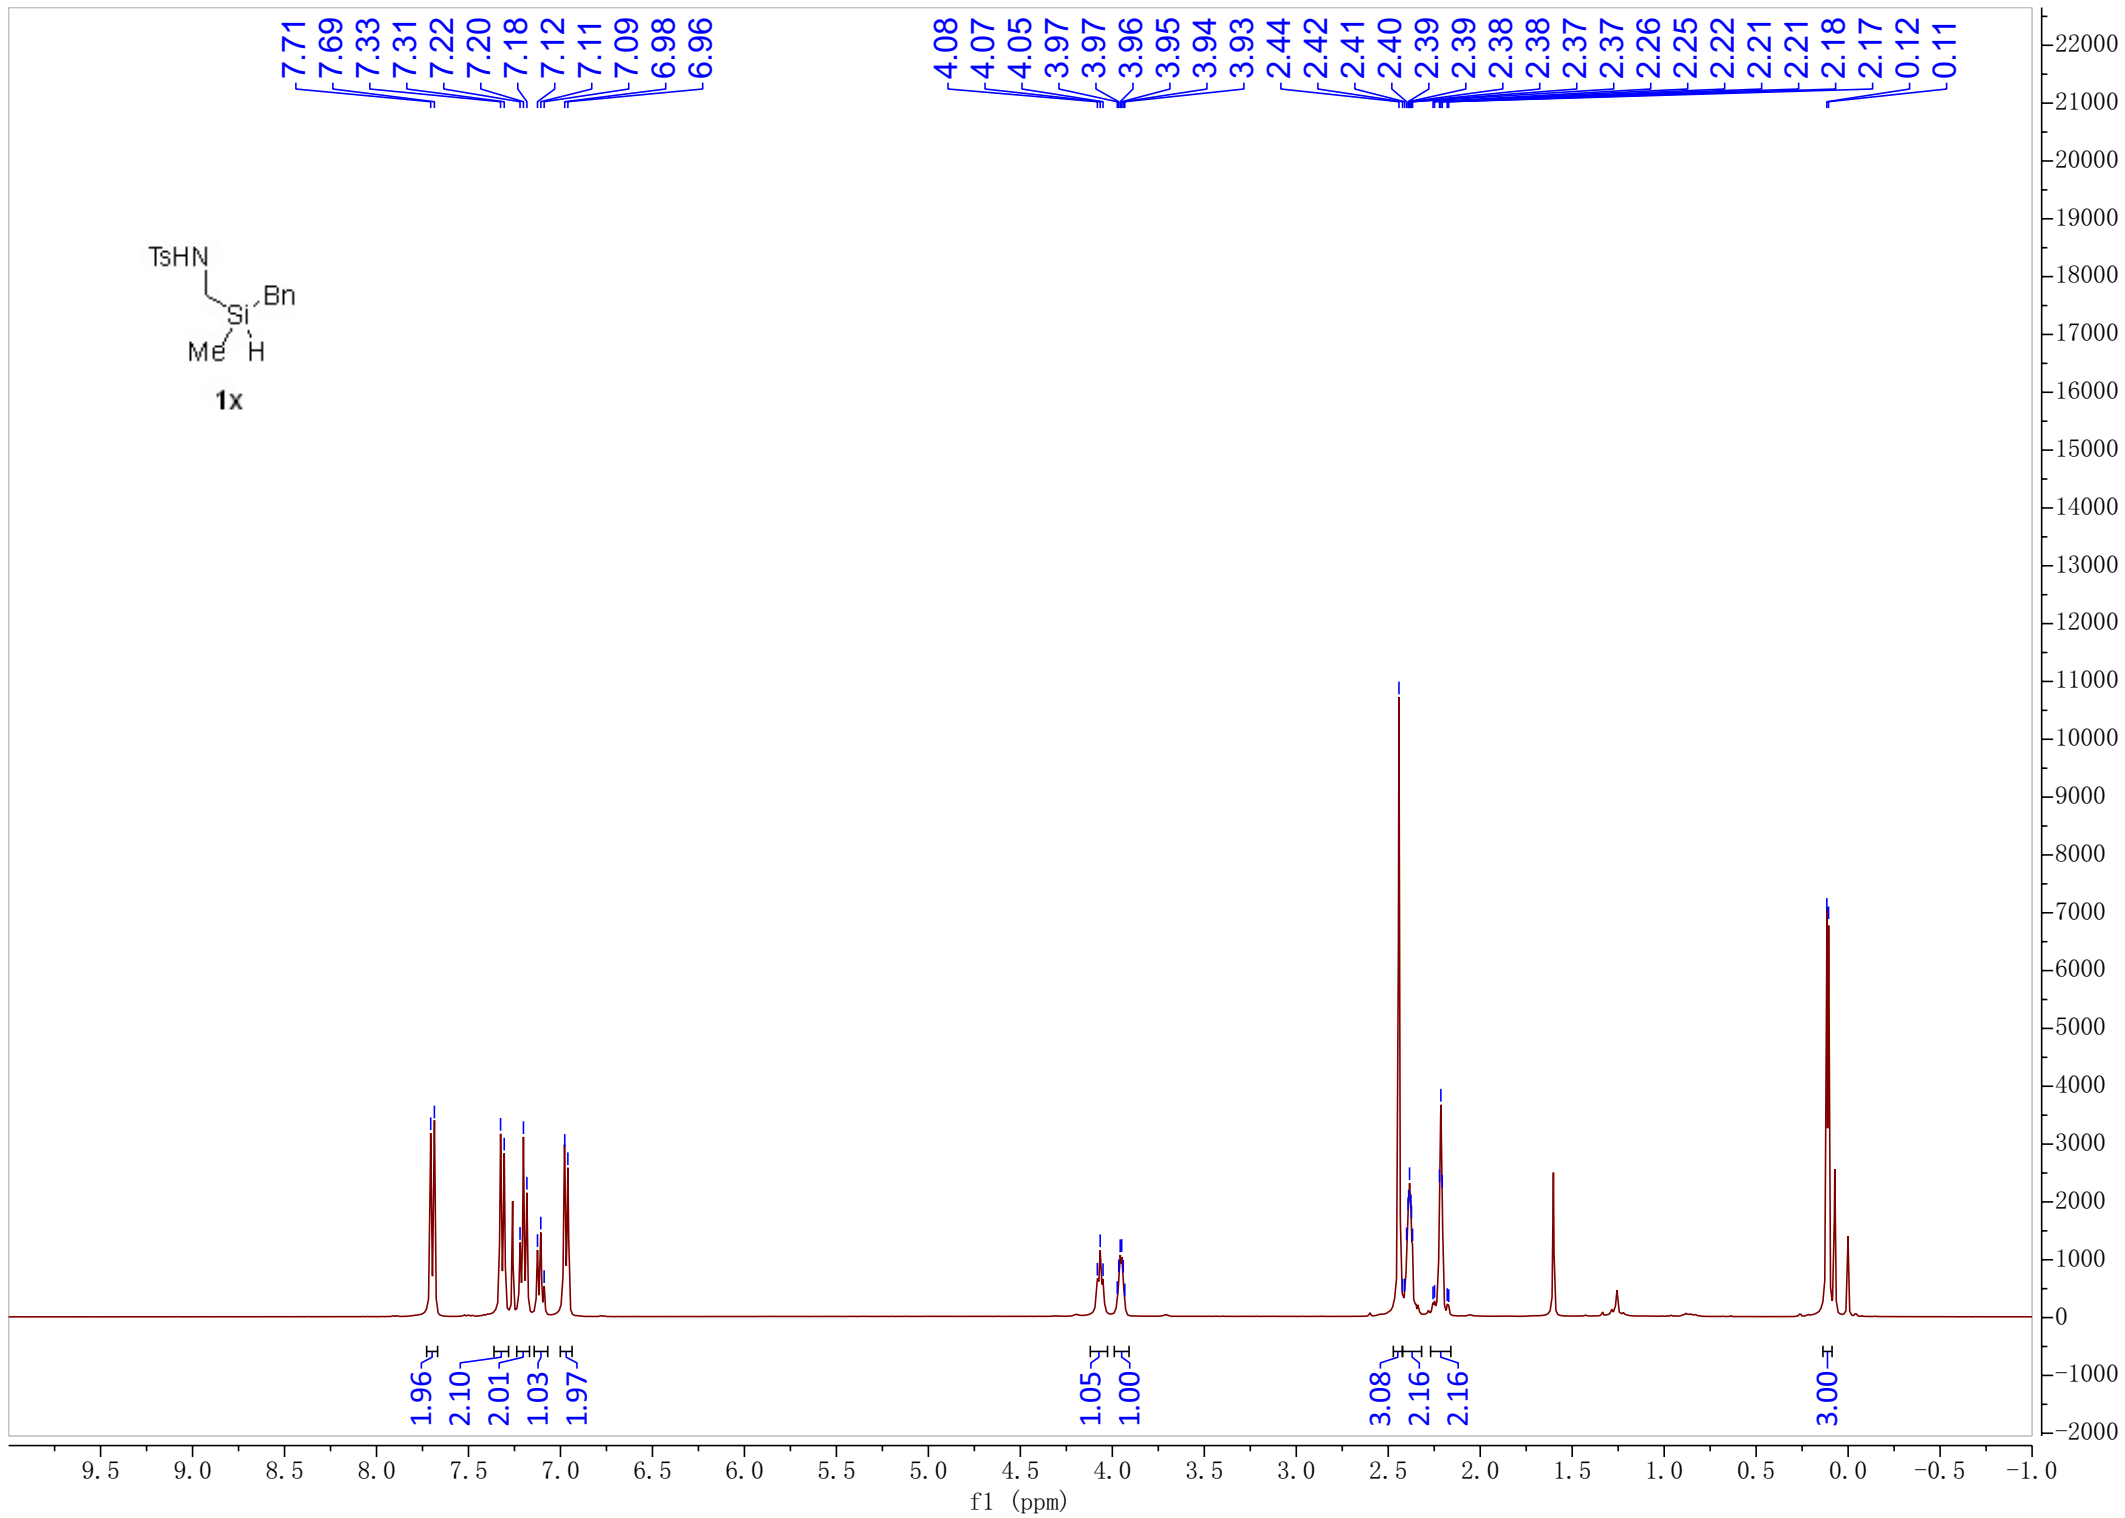

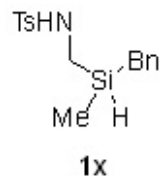

143.47  
138.12  
135.25  
129.61  
128.70  
128.01  
127.51  
124.88

-28.81  
21.51  
21.08

-7.65

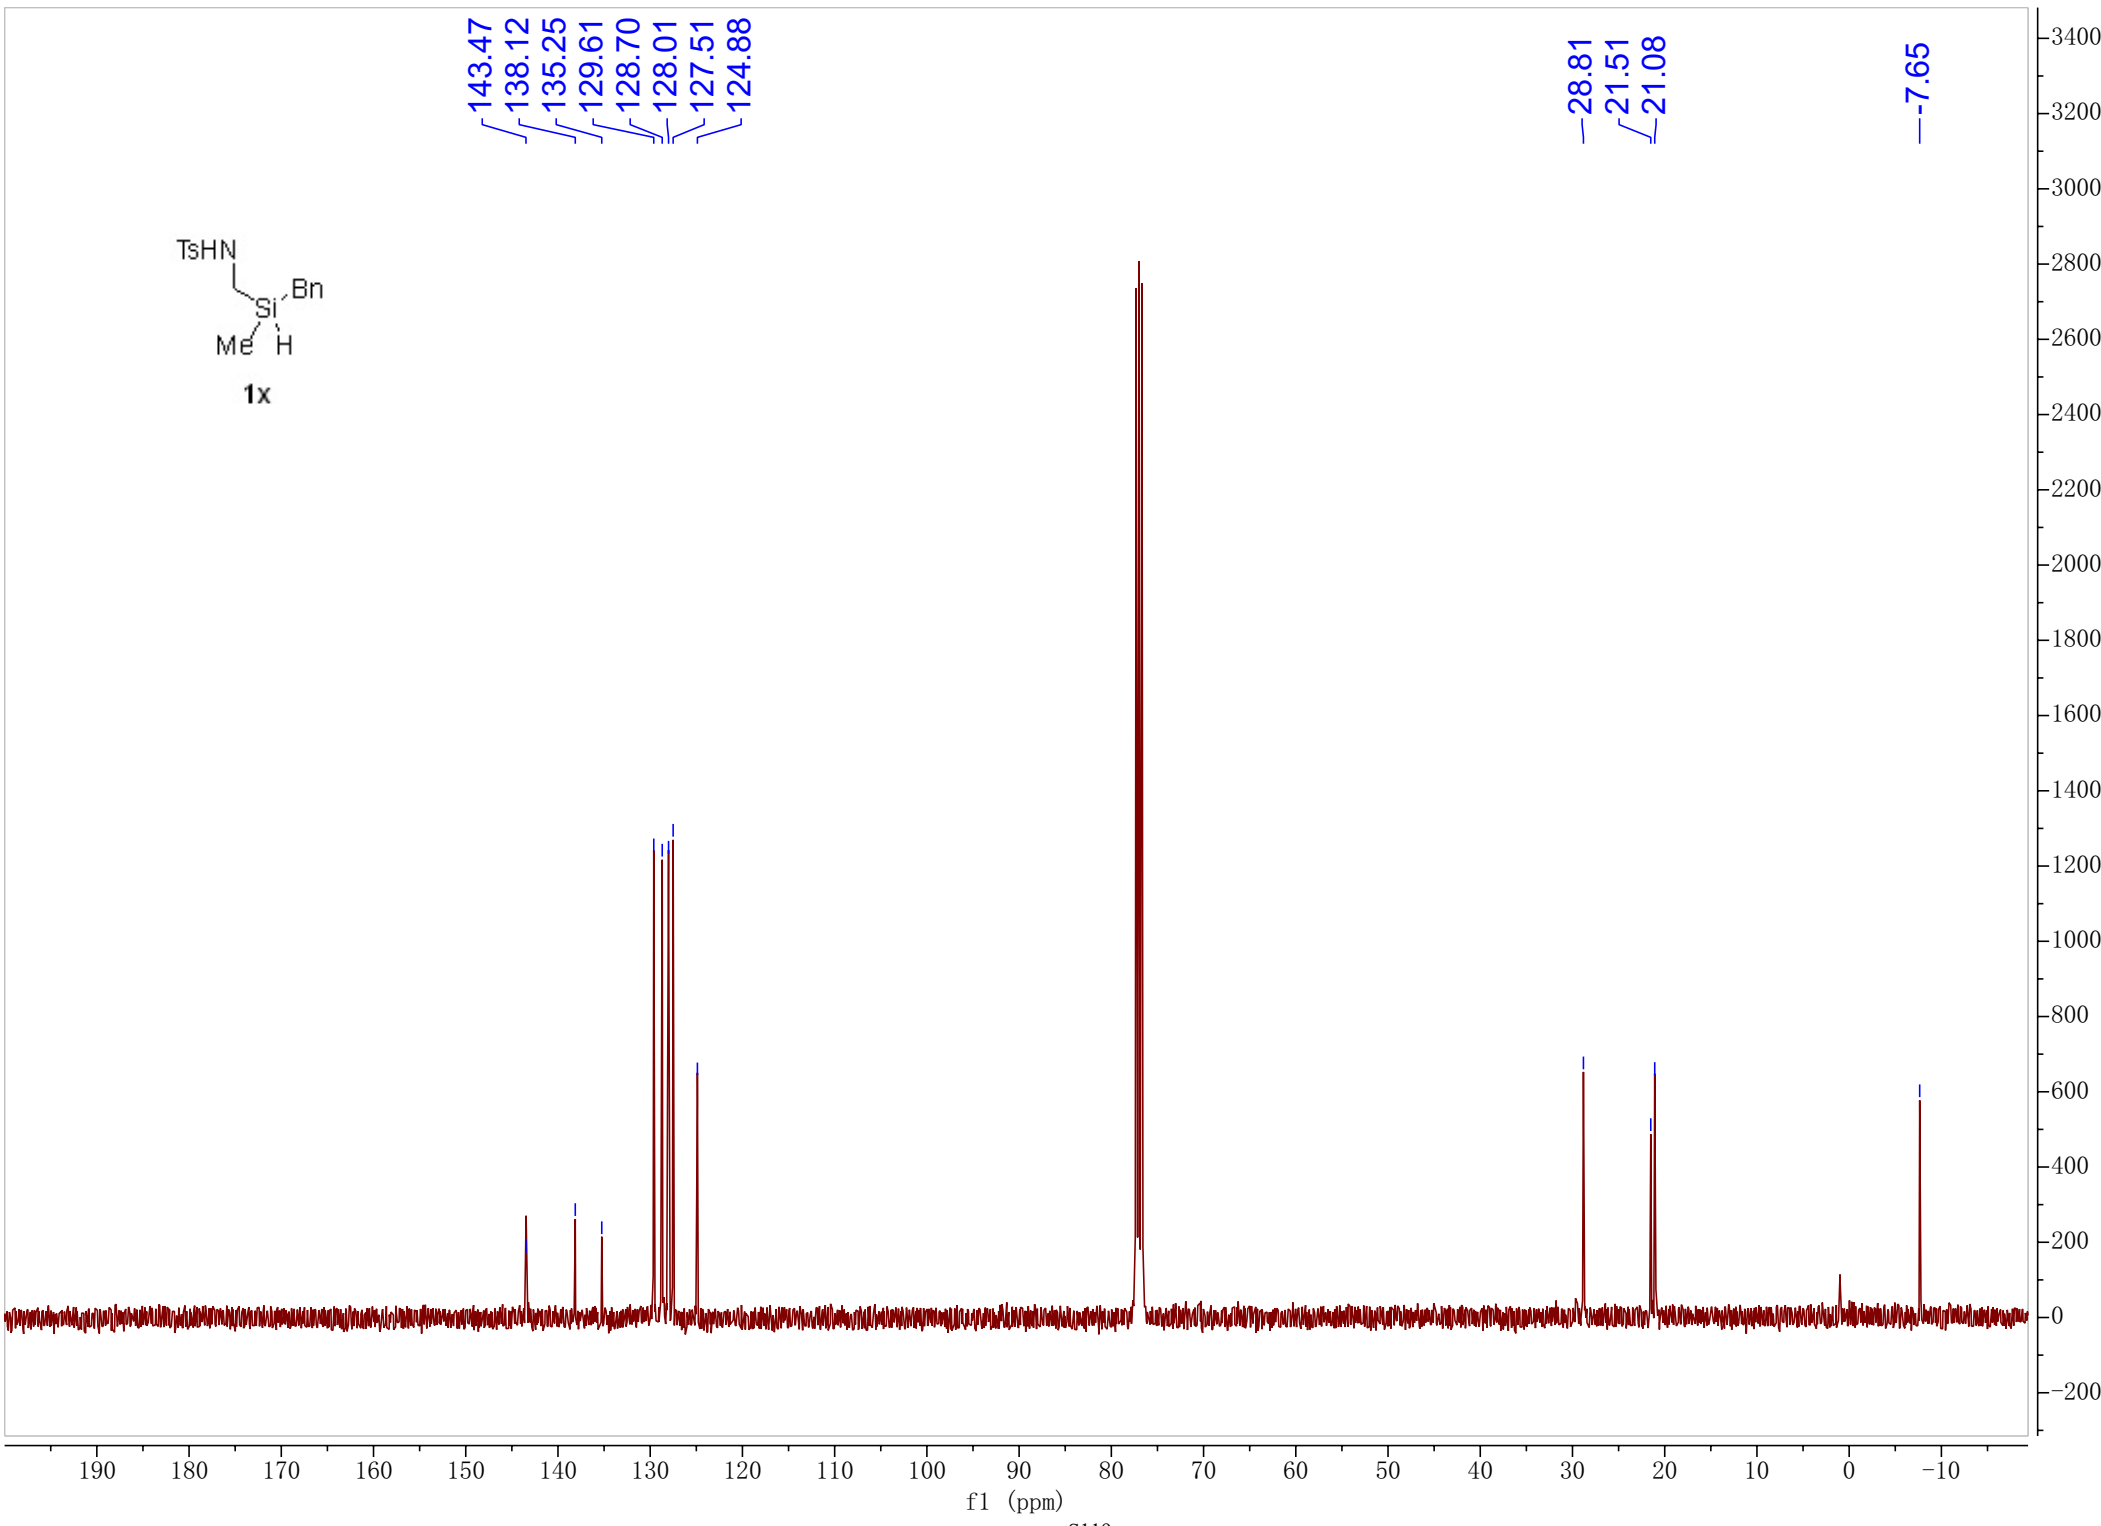

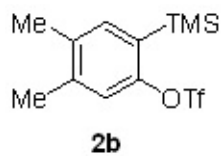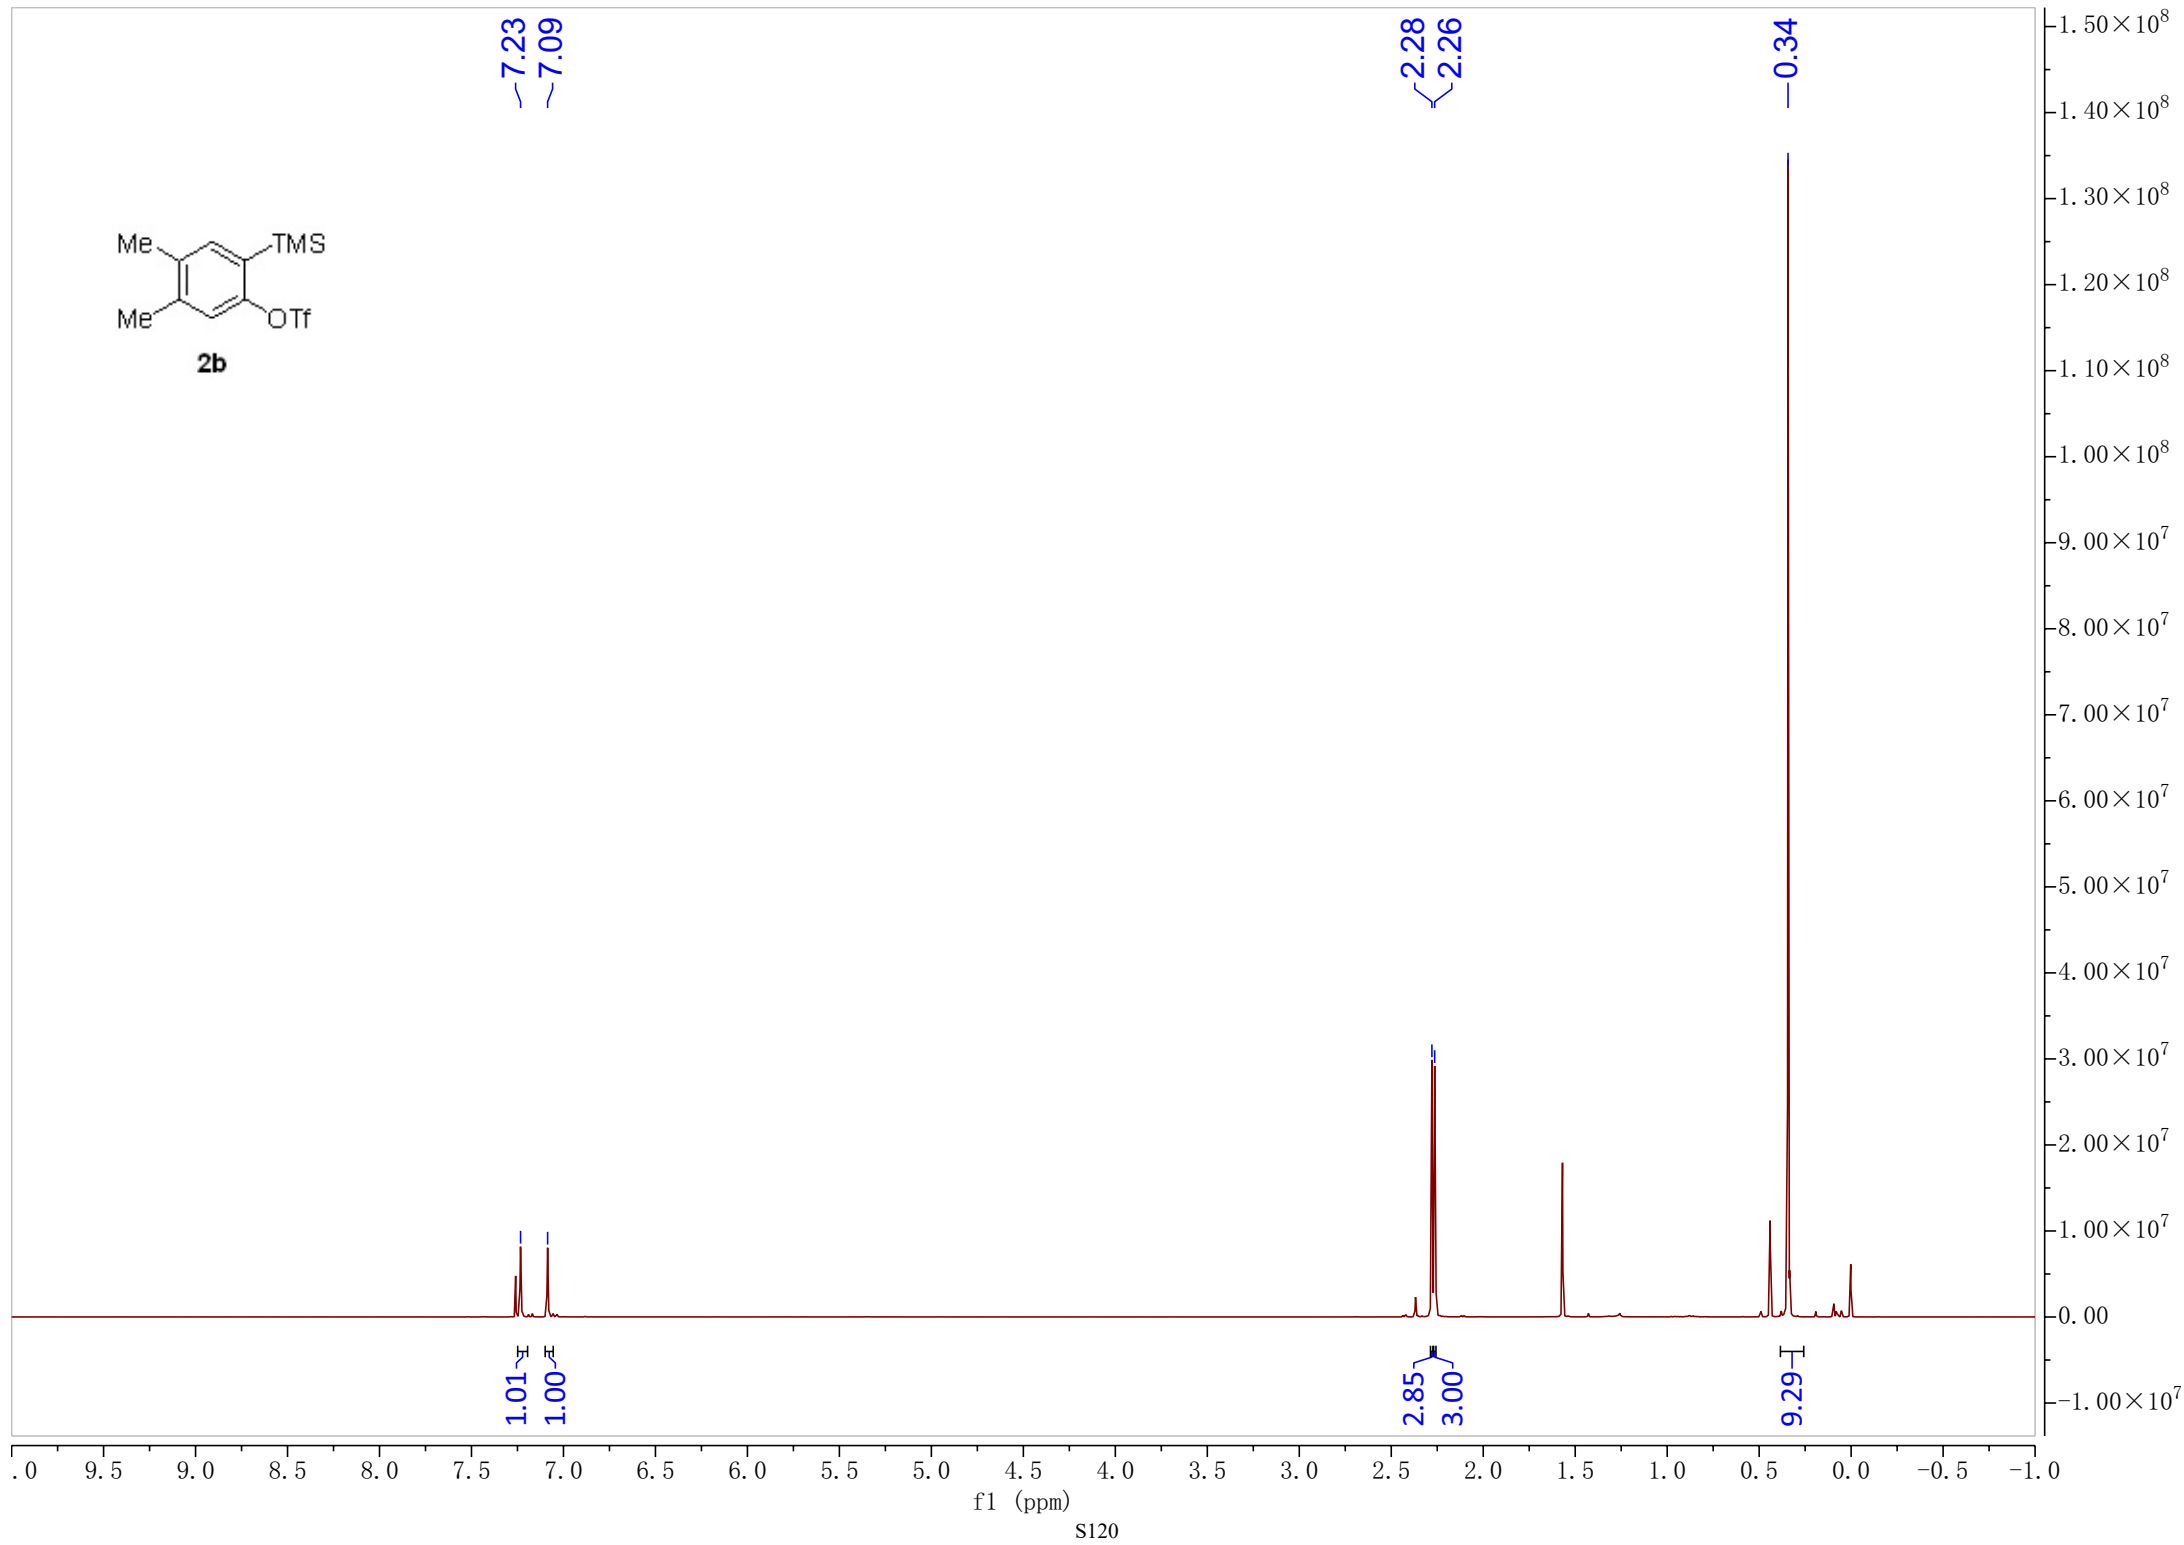



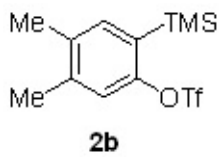

153.16  
140.30  
137.01  
136.01  
129.07  
123.30  
120.50  
120.12  
116.94  
113.76

19.93  
19.14

0.74

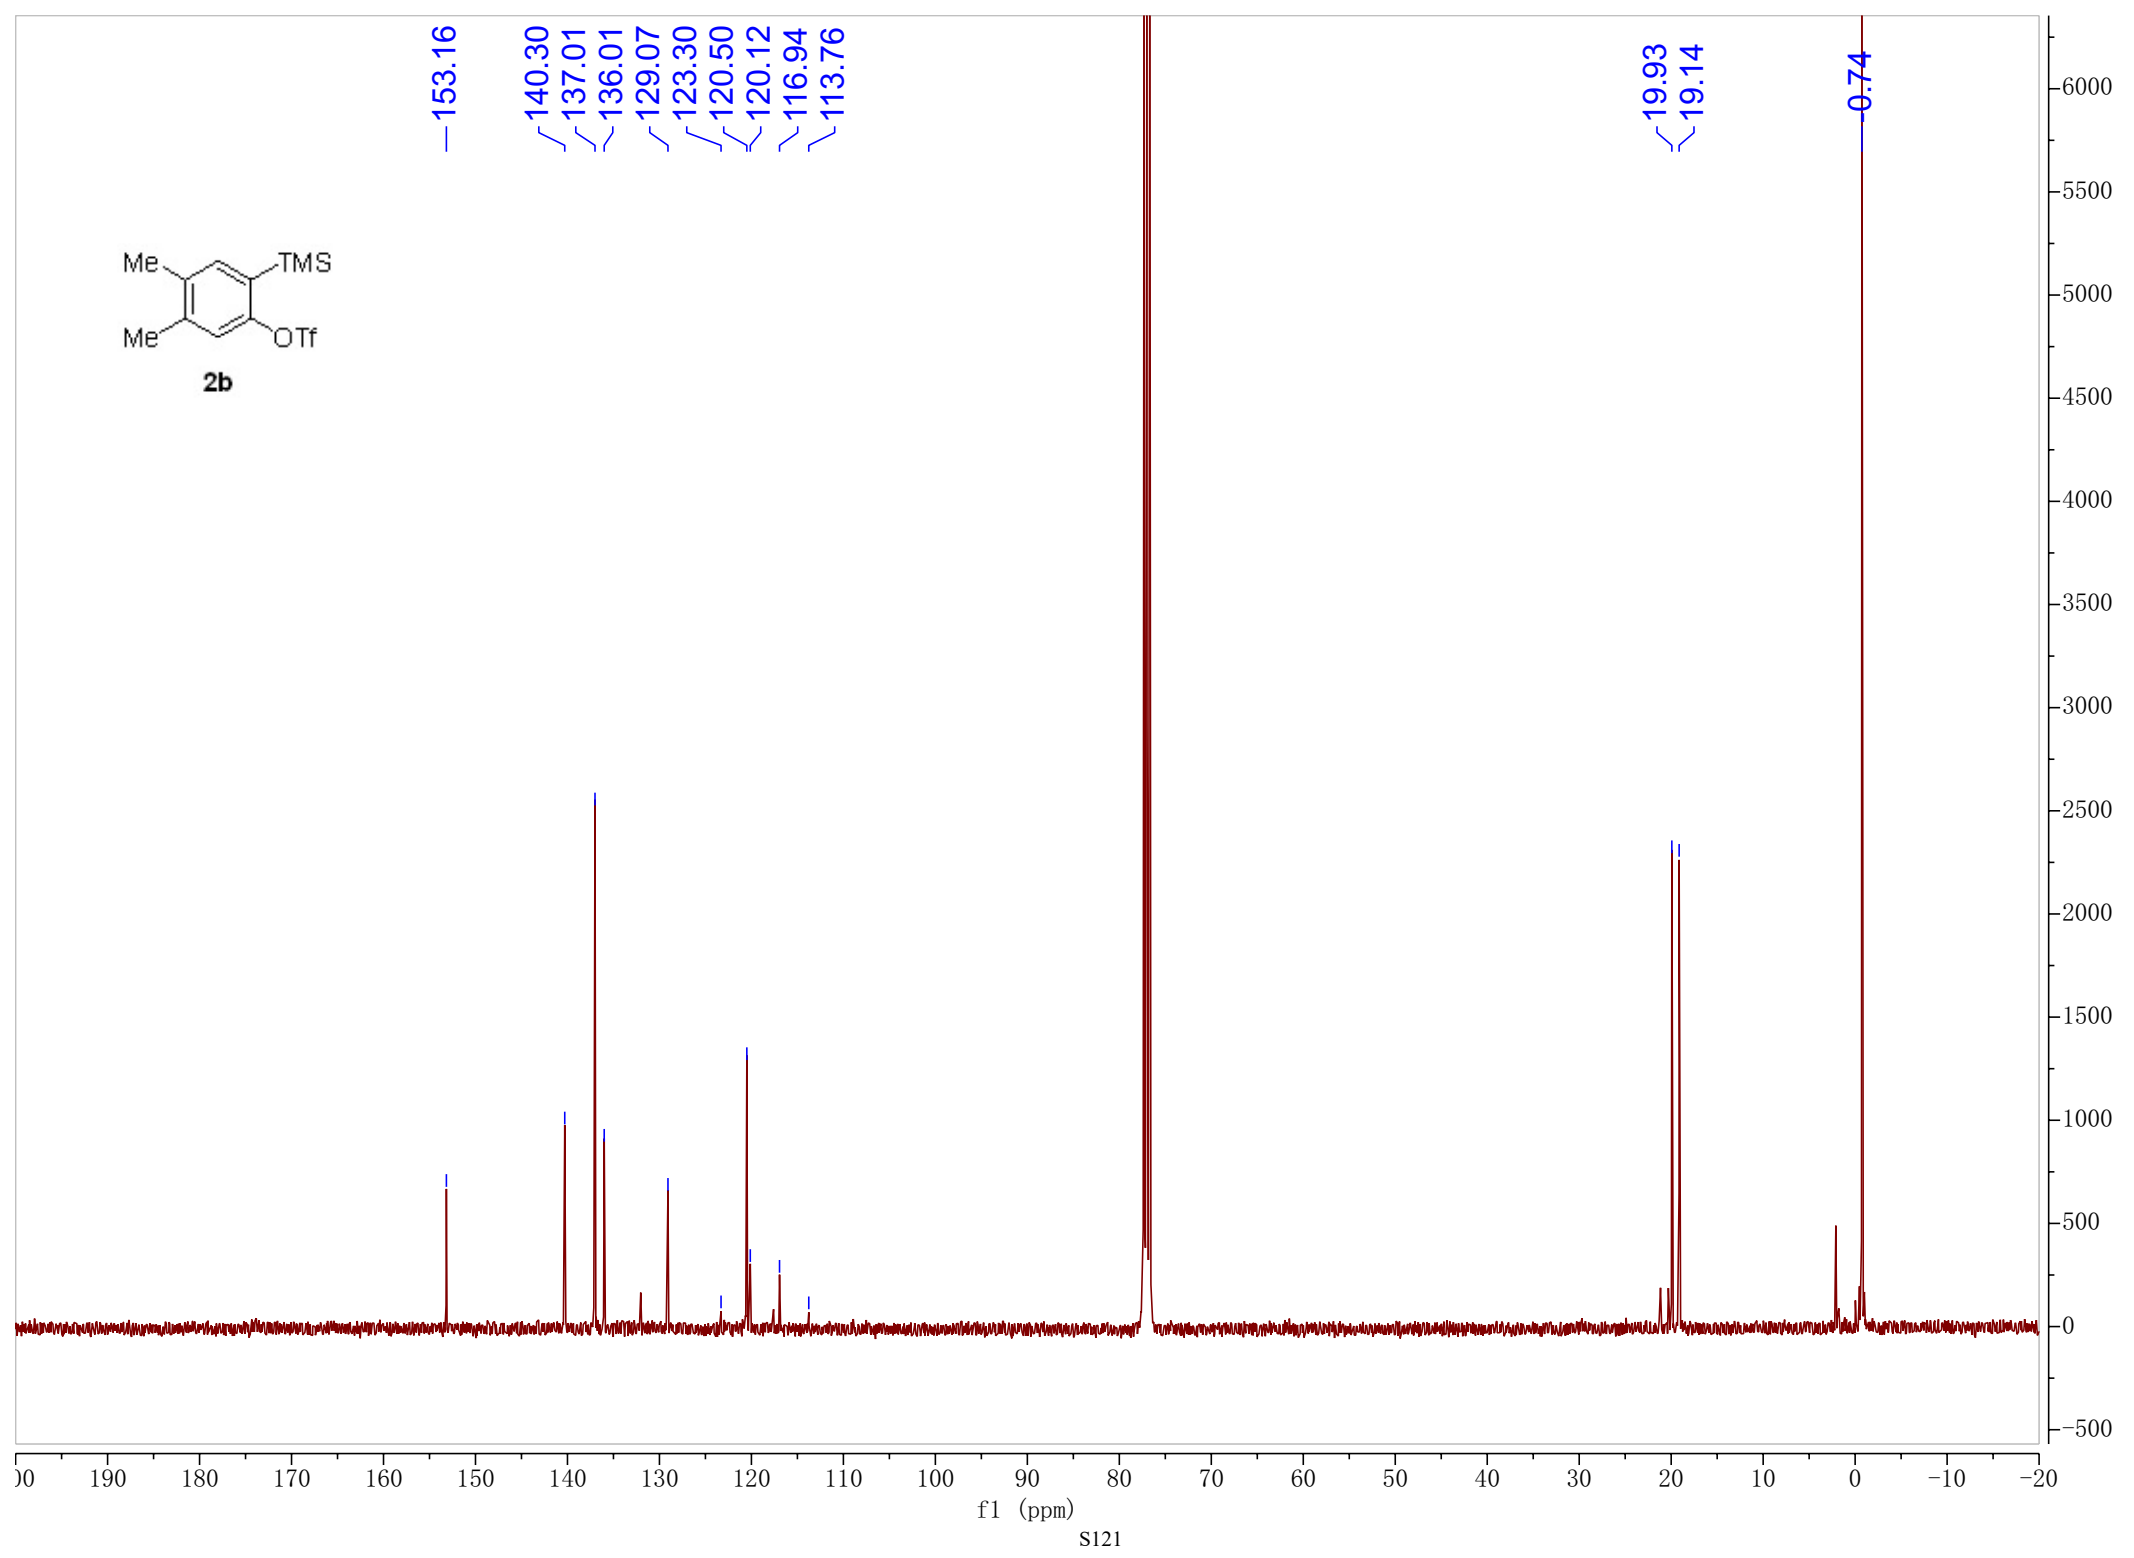

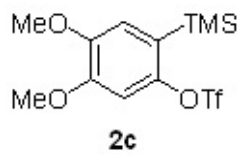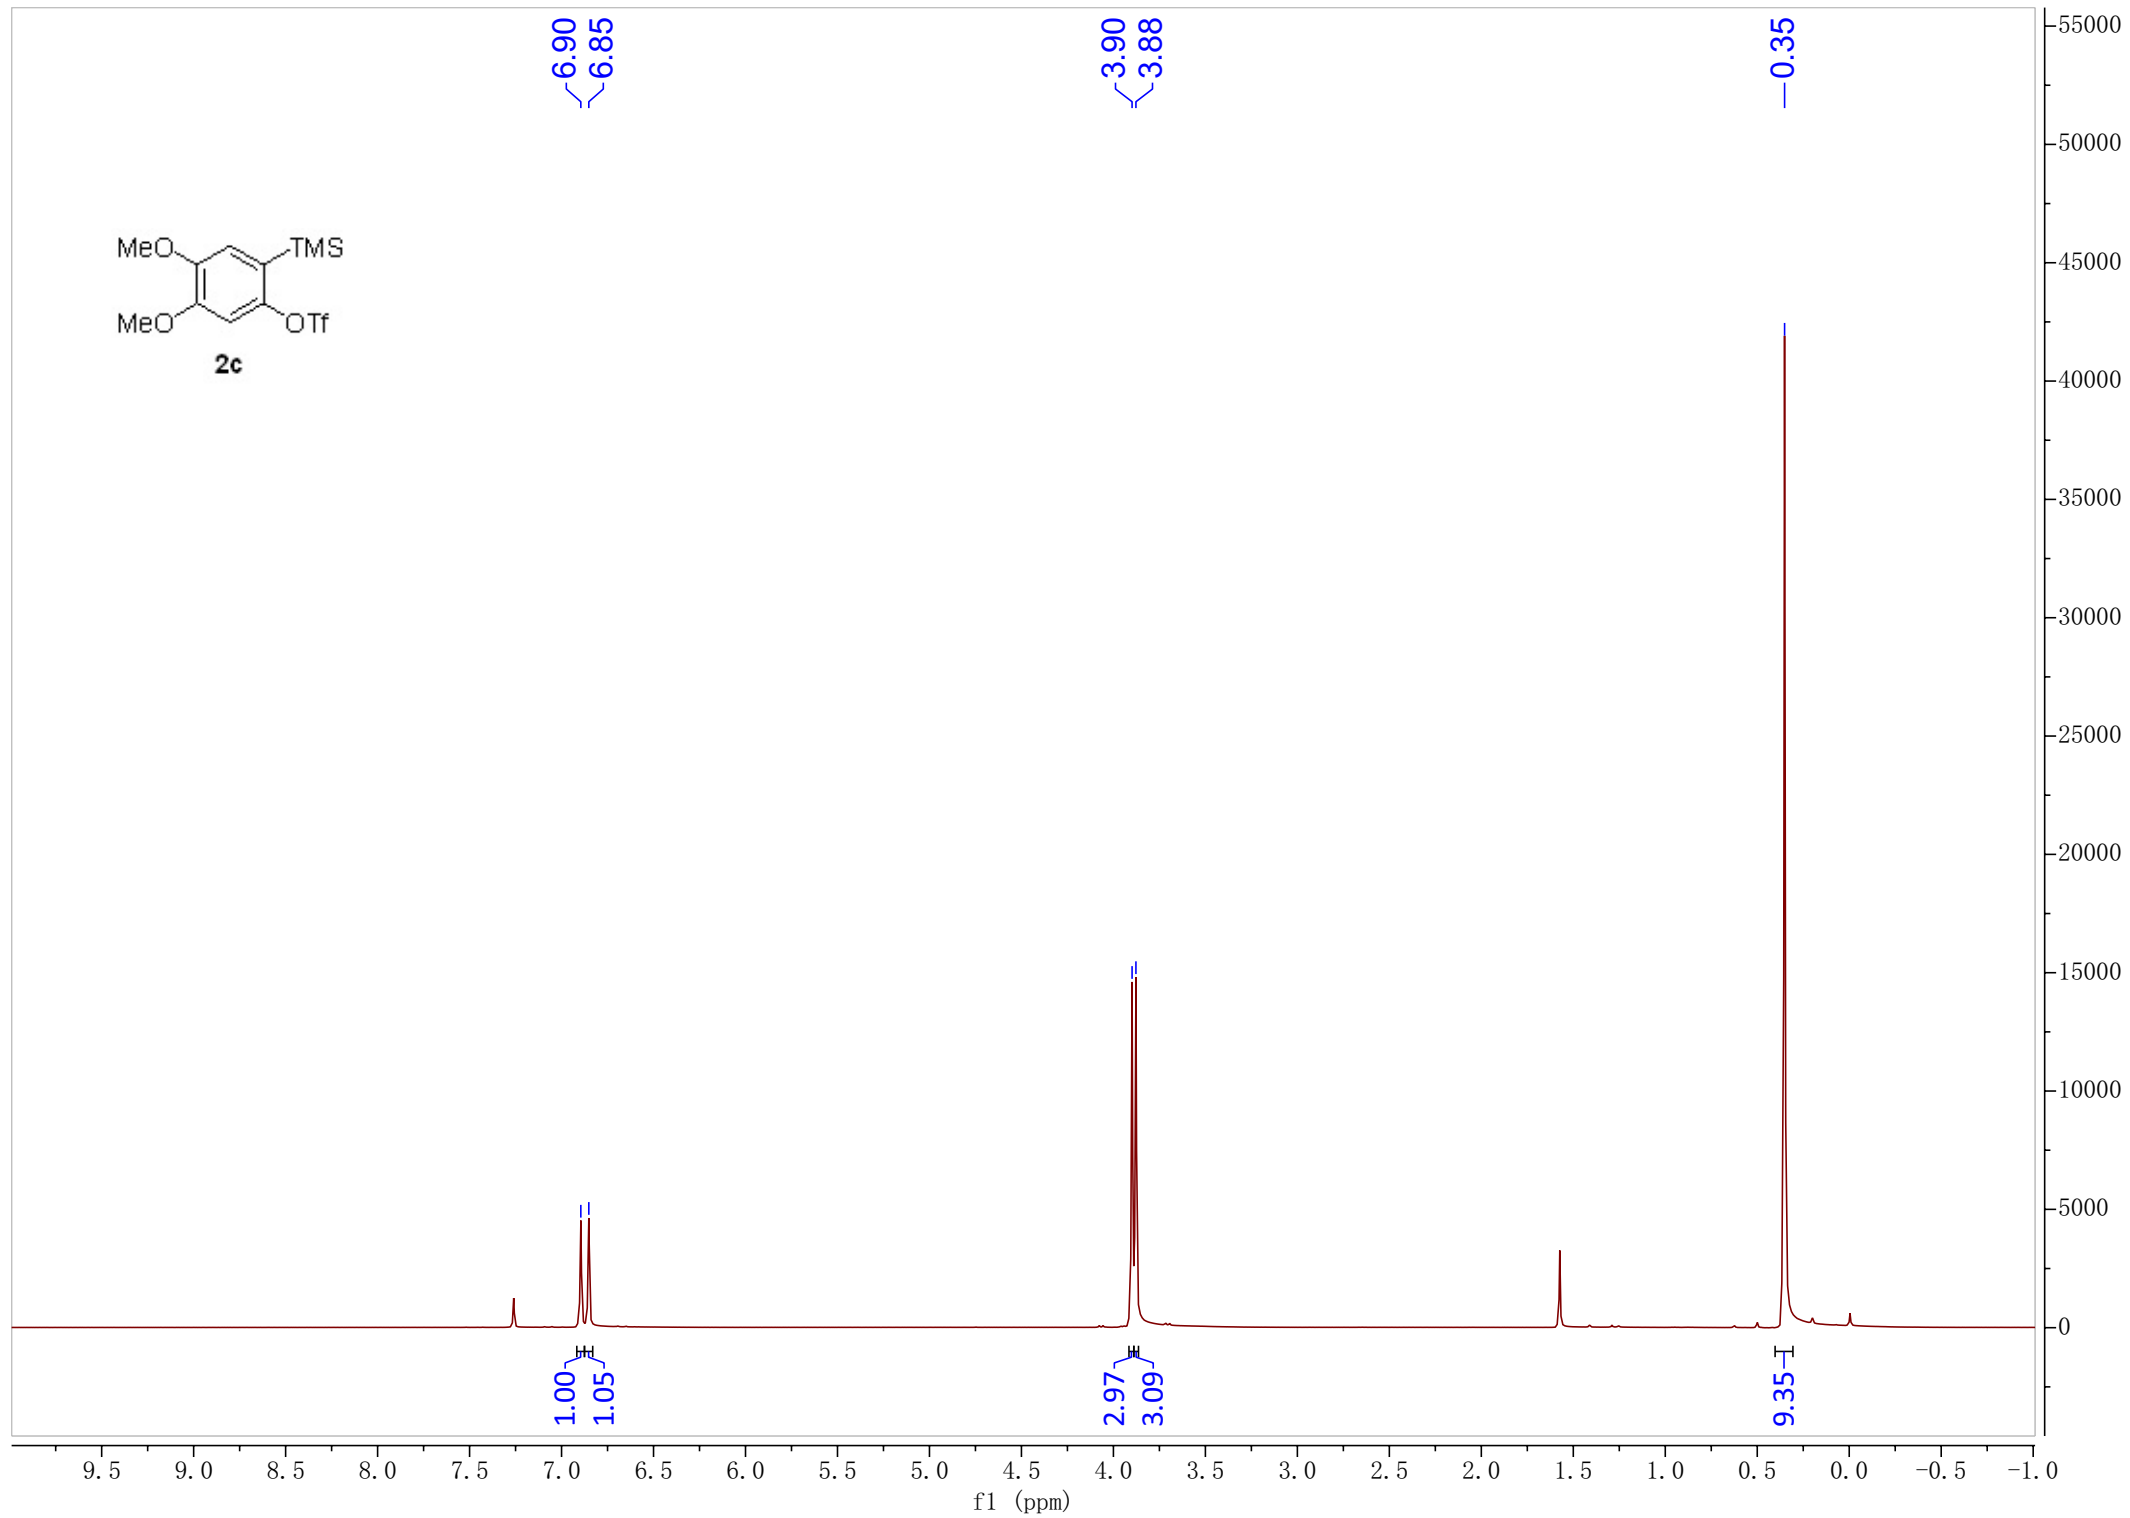

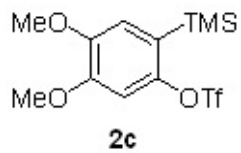

150.61  
148.23  
147.87  
123.27  
123.06  
120.09  
116.91  
116.57  
113.73  
104.22  
104.20  
104.19  
104.17

56.14  
56.06

-0.71

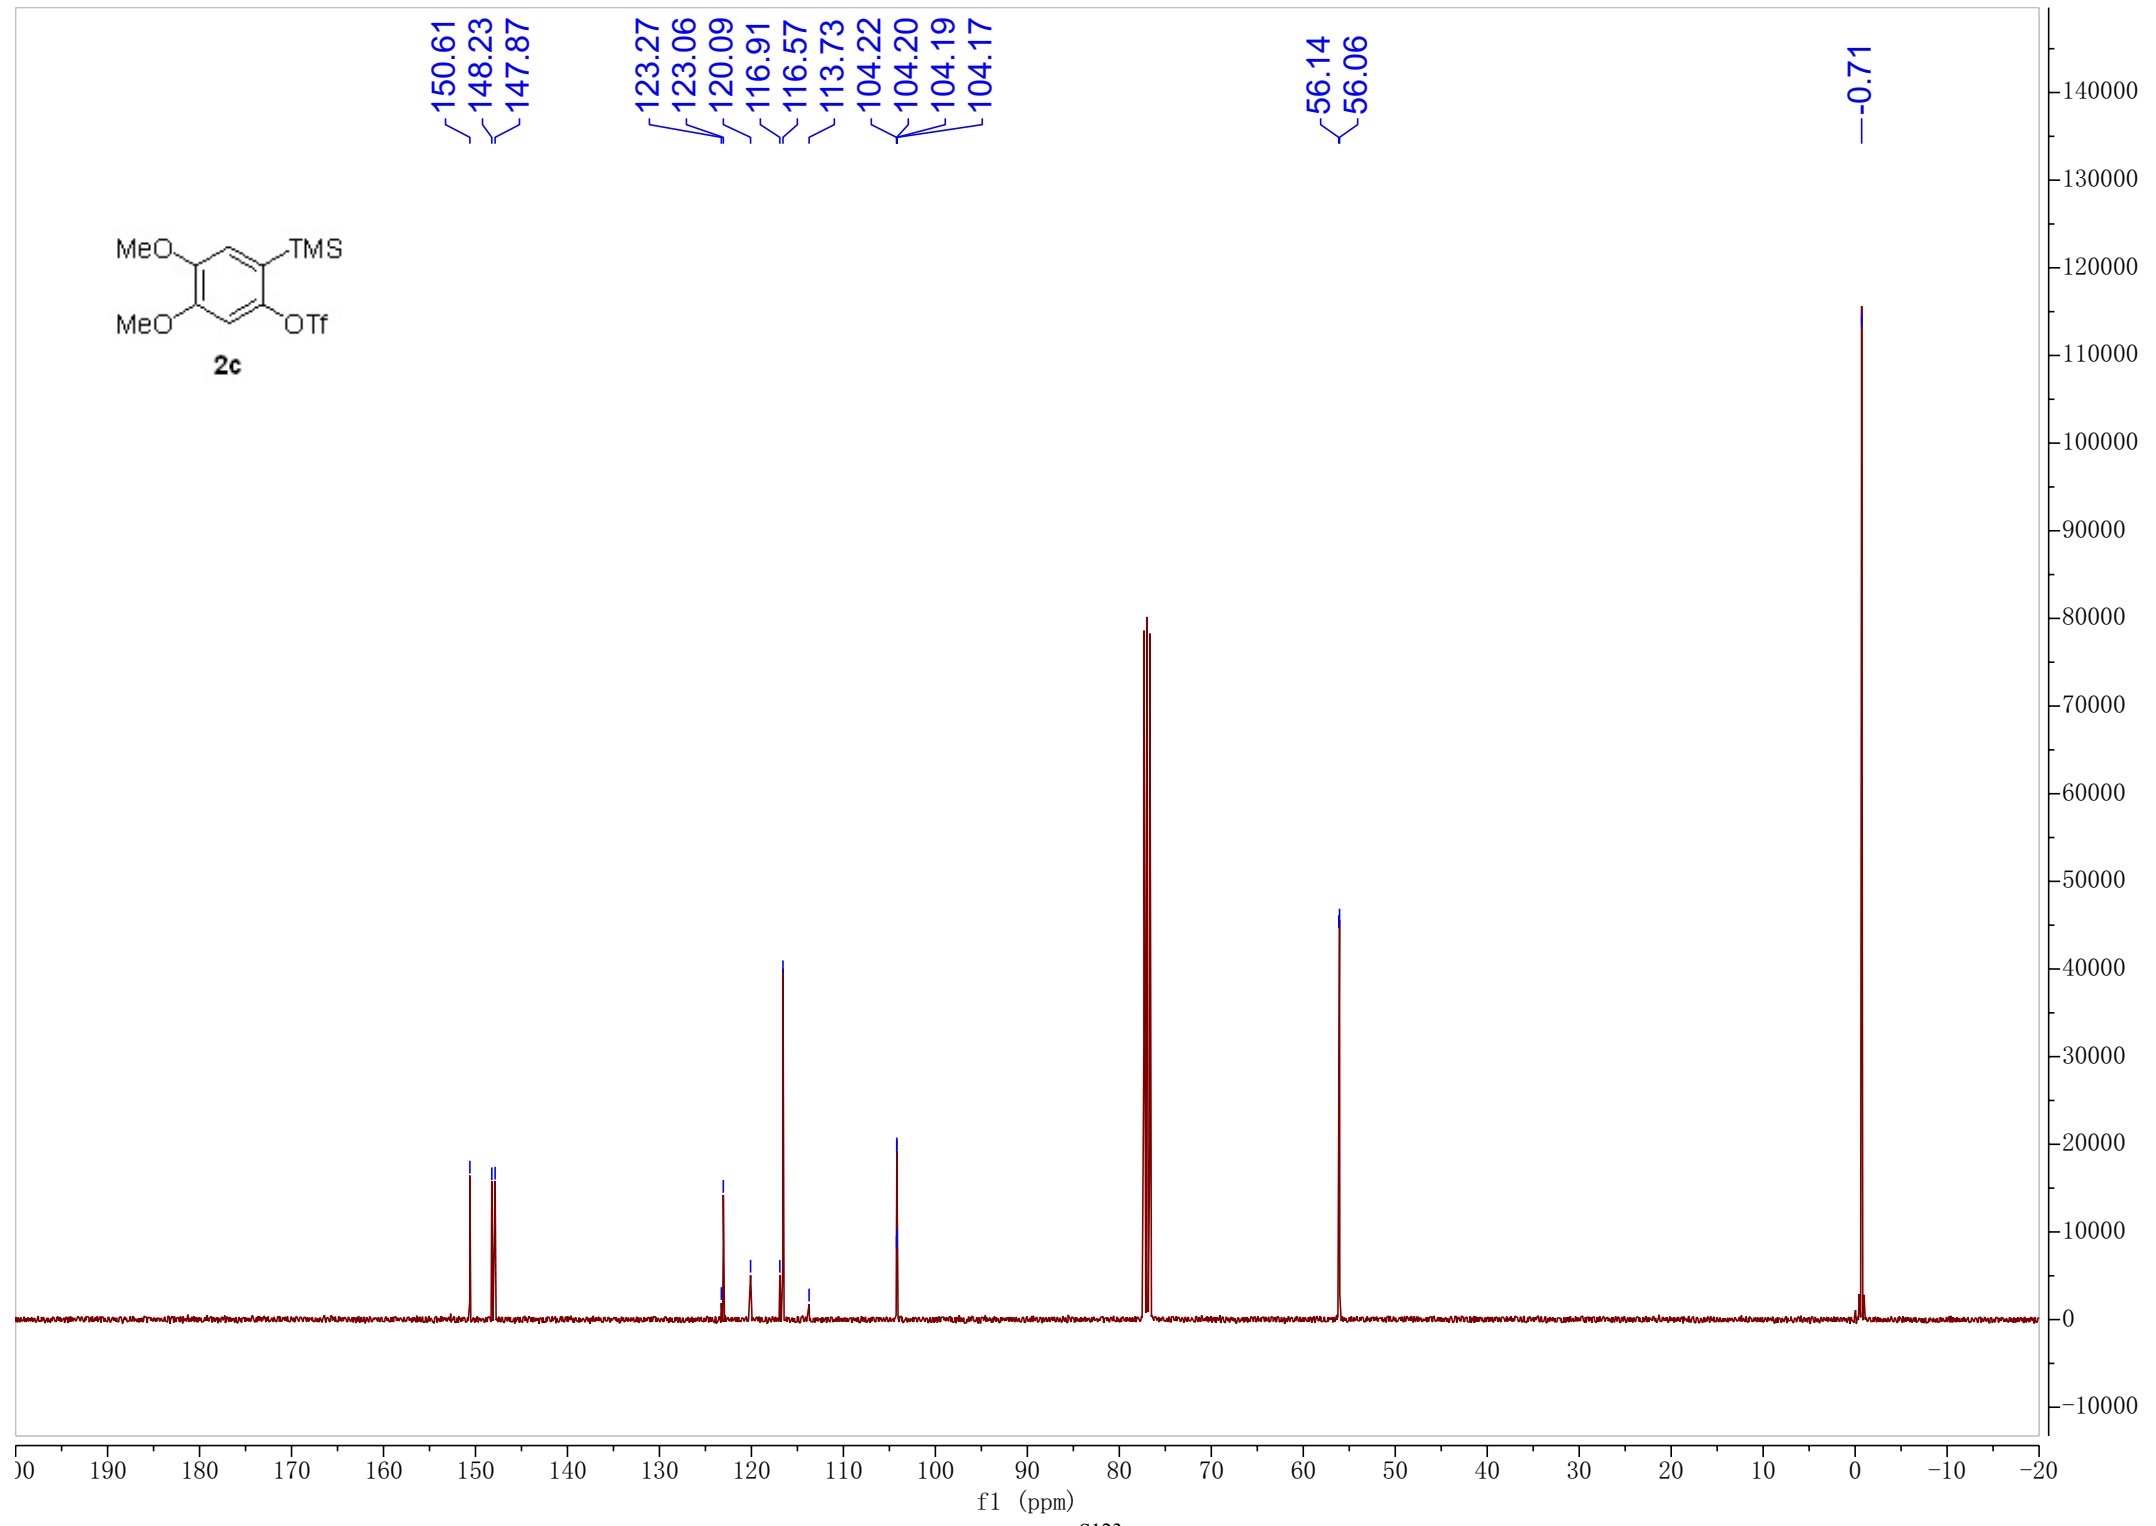

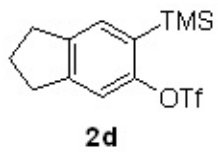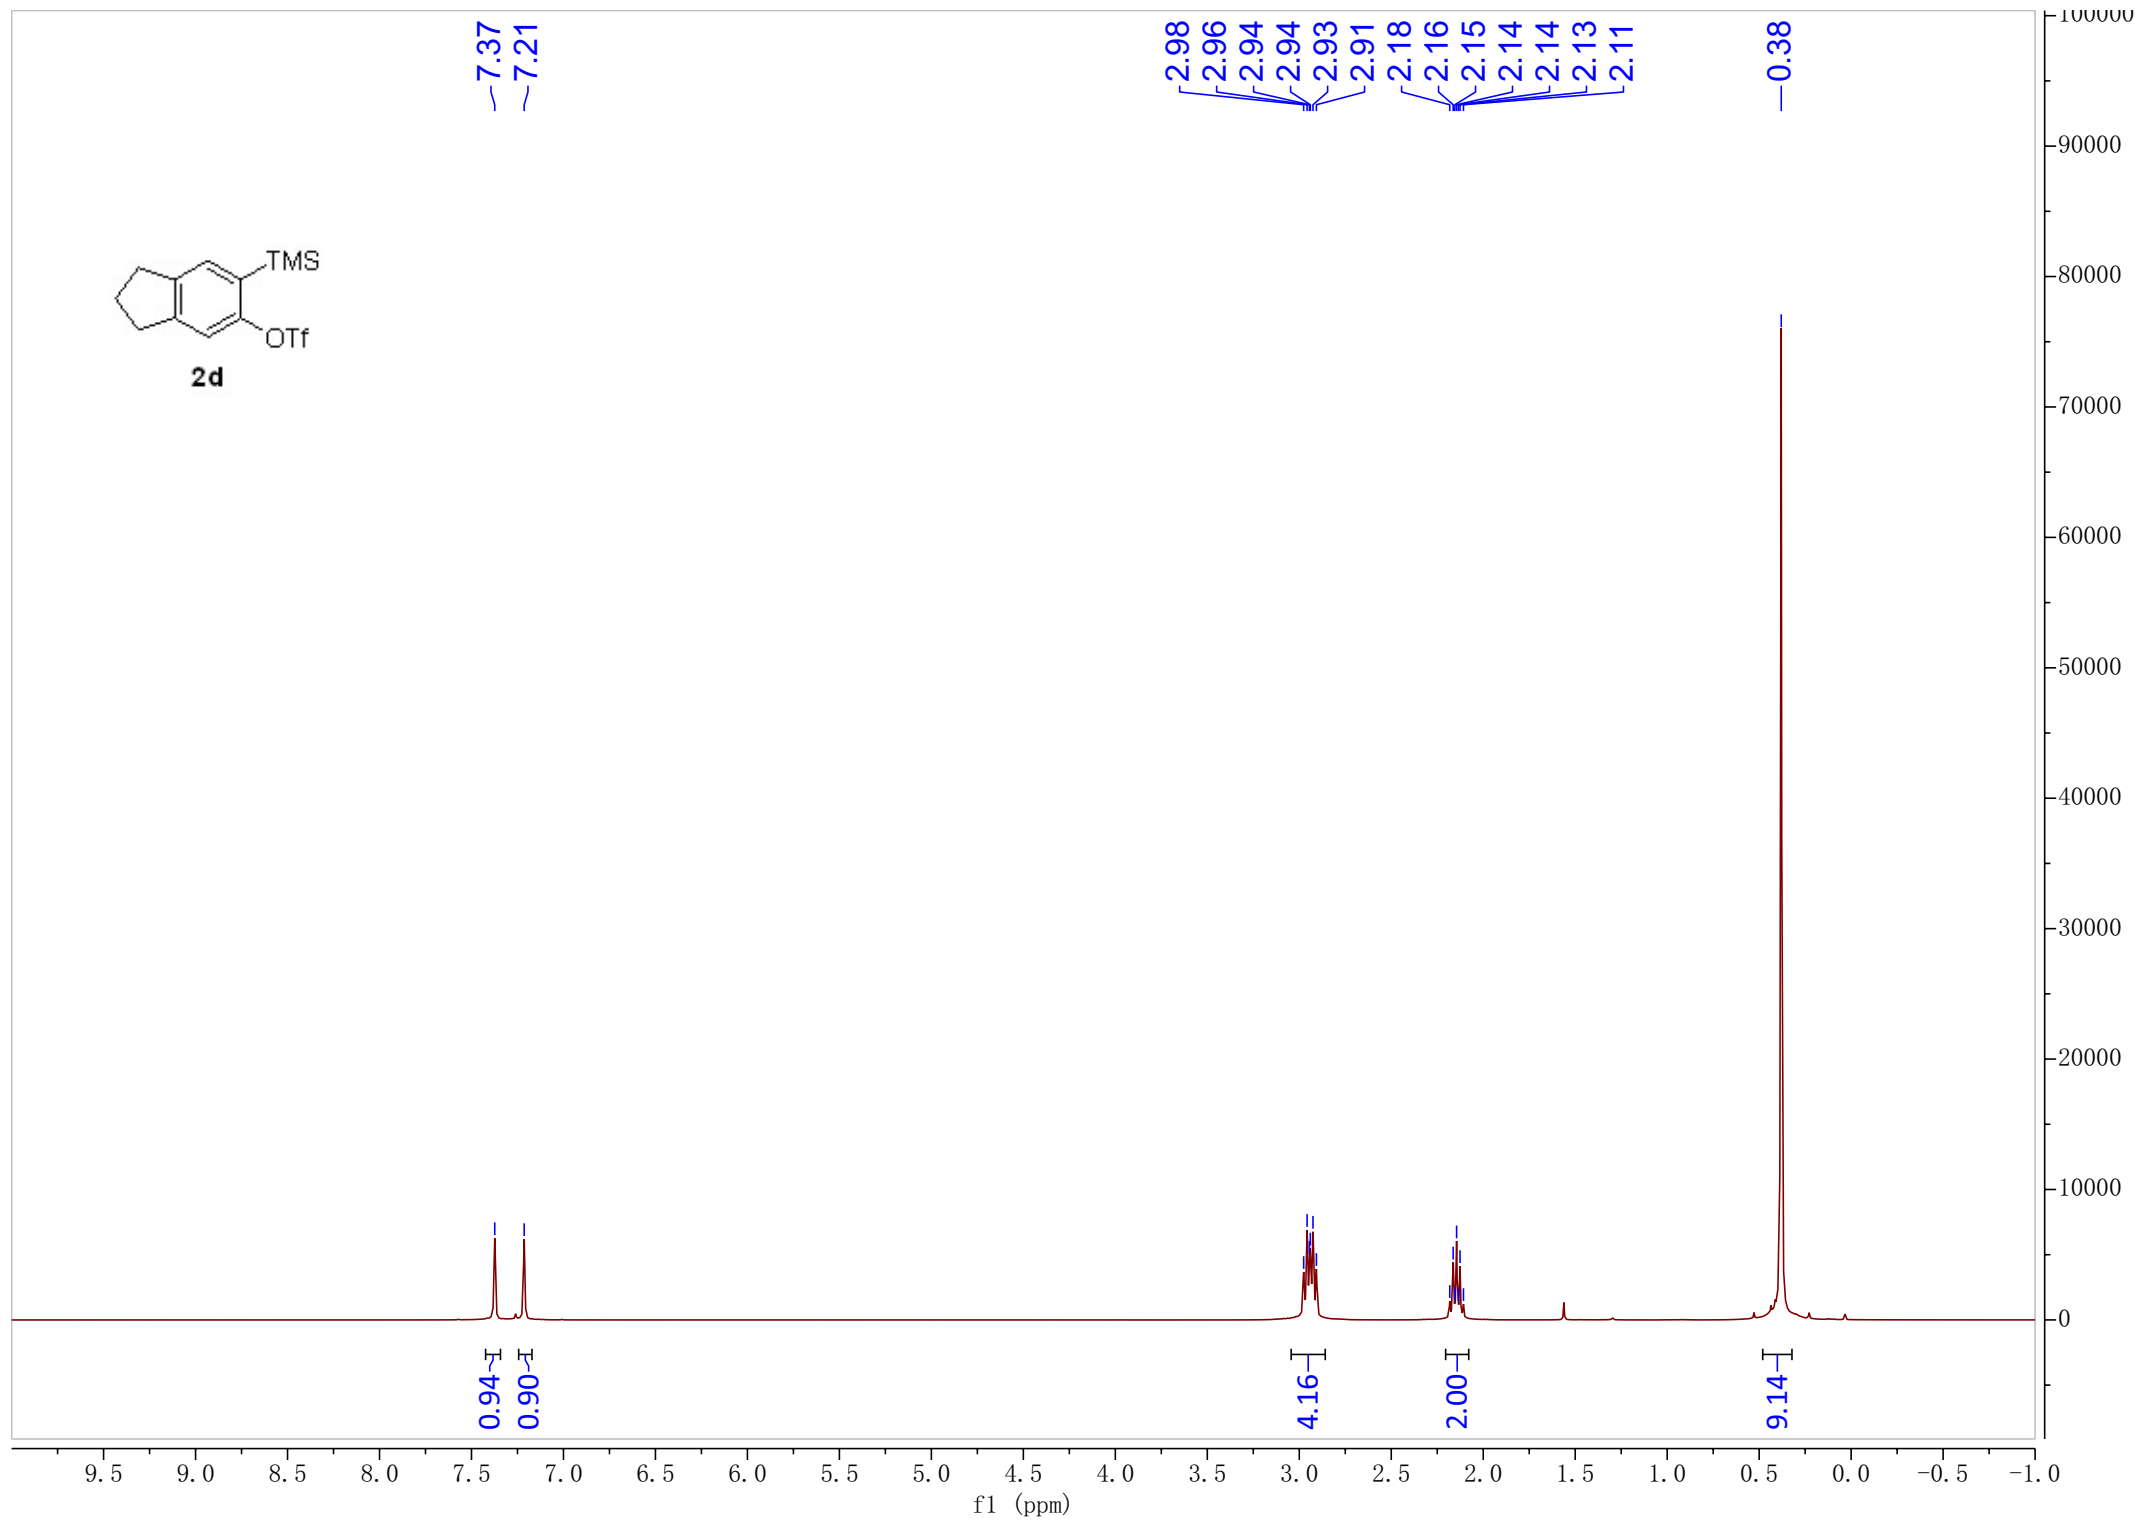

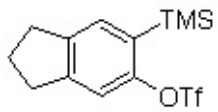

**2d**

153.92  
148.31  
143.64  
131.32  
129.45  
123.28  
120.10  
116.92  
115.71  
113.74

33.05  
32.11  
25.69

0.73

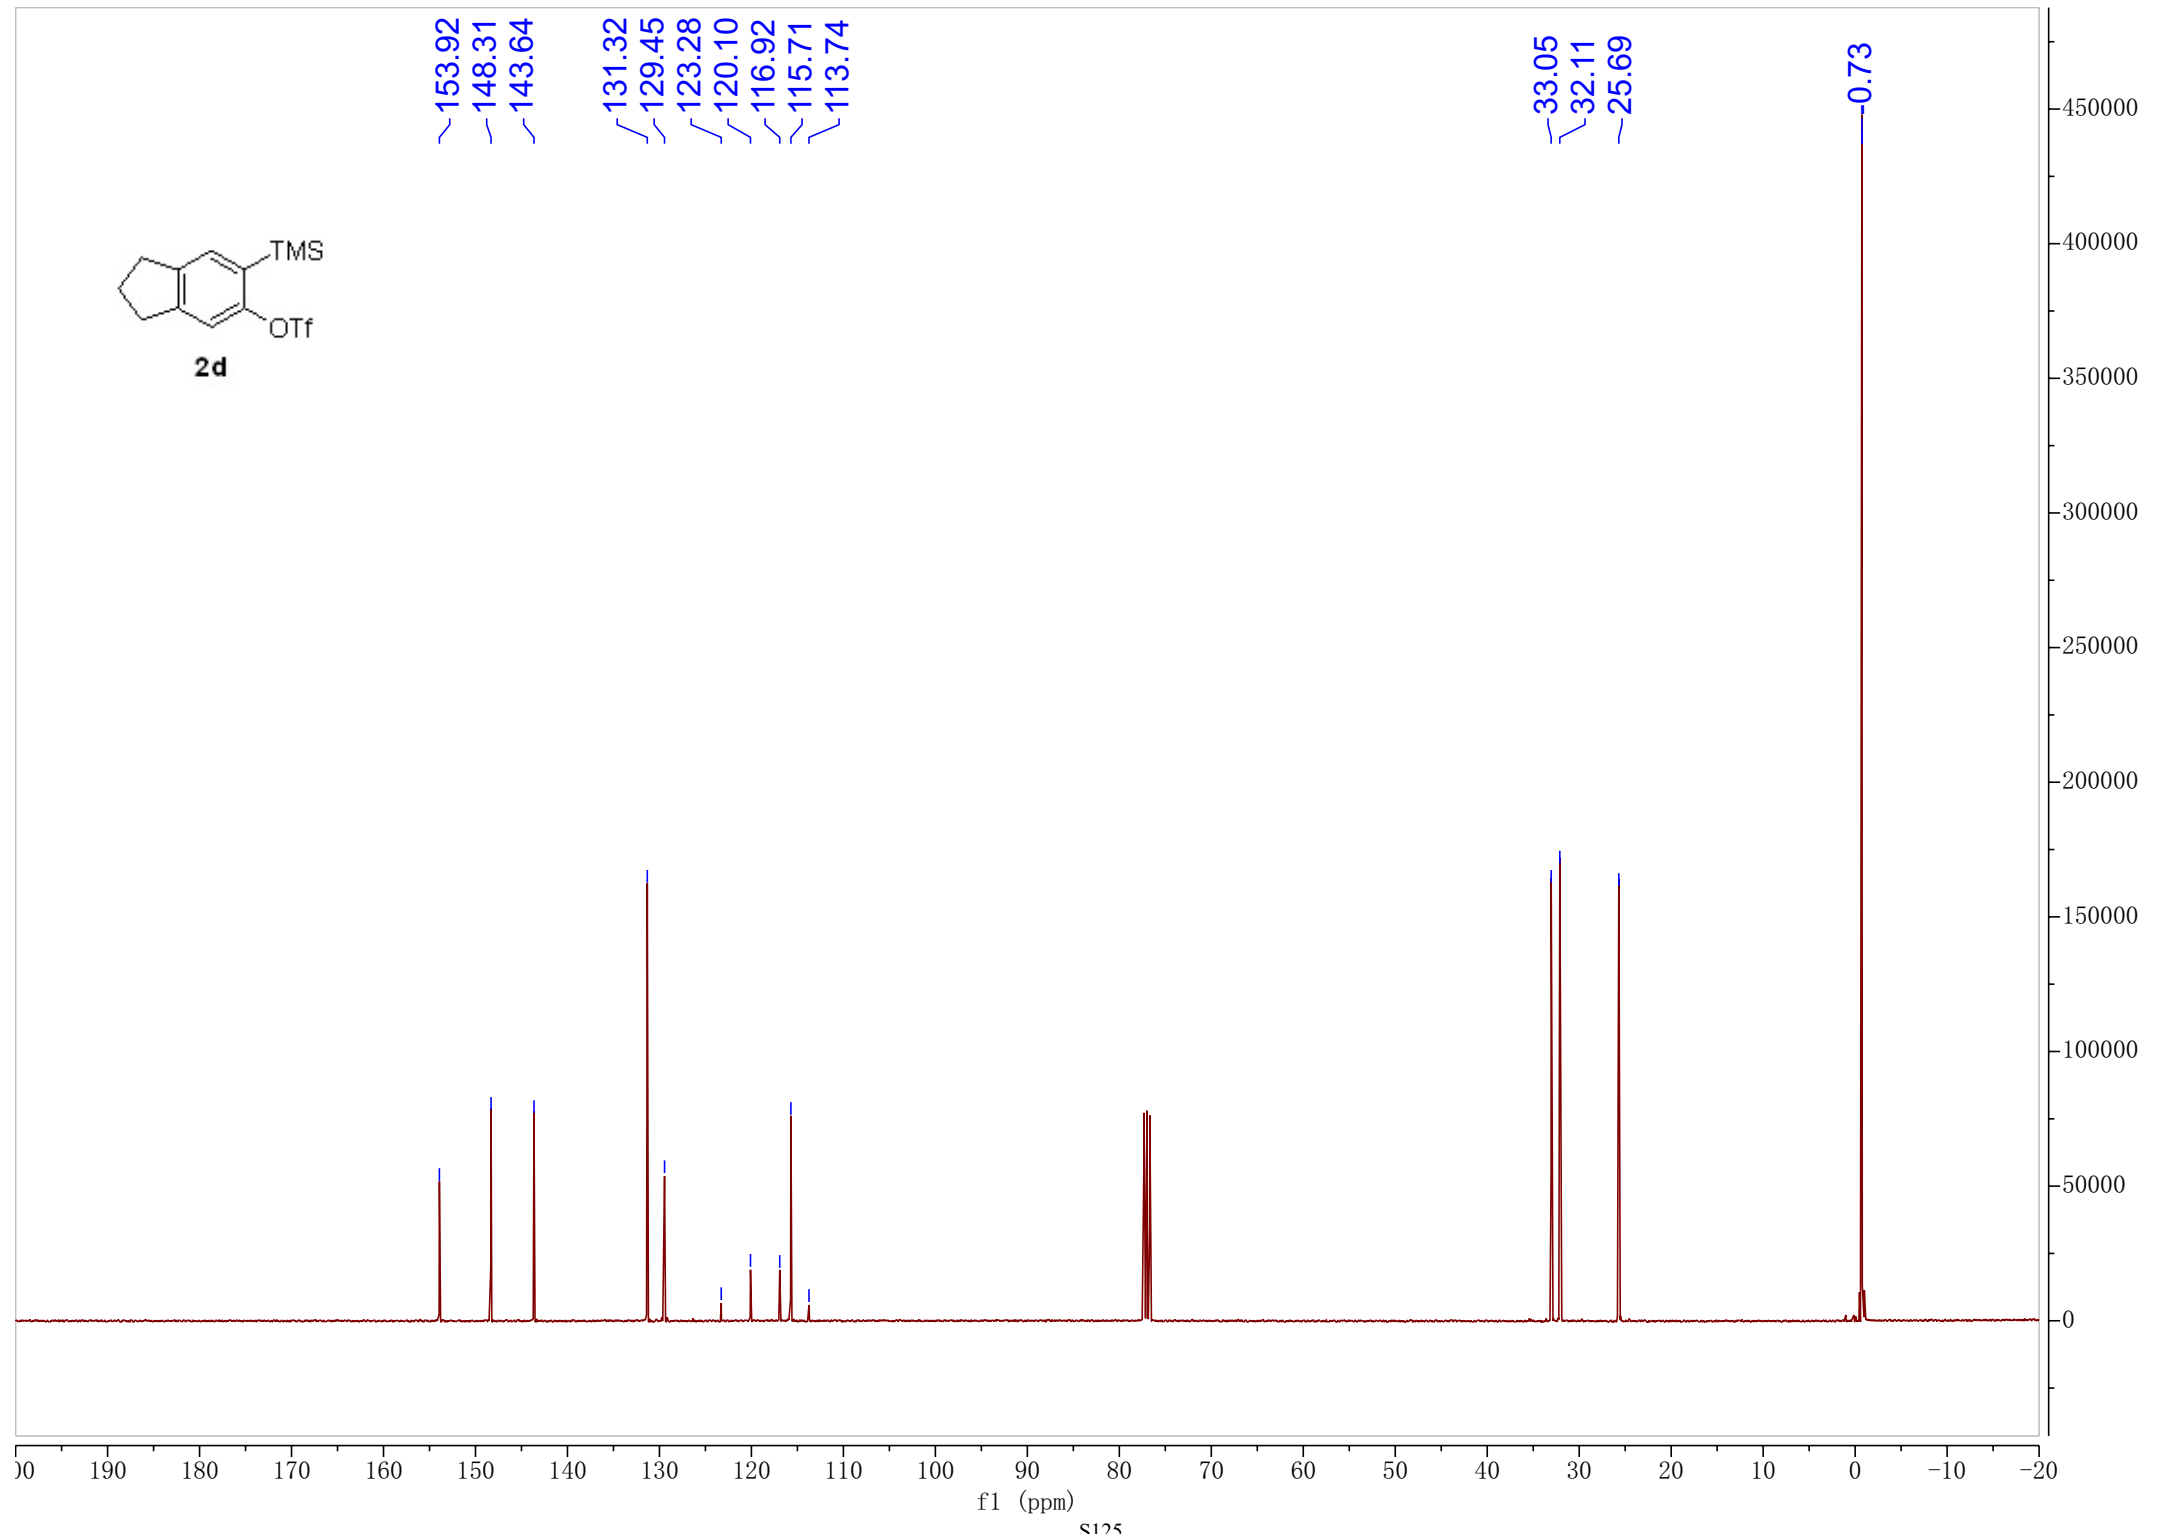

f1 (ppm)

S125

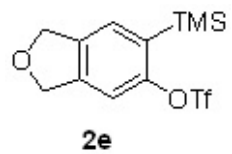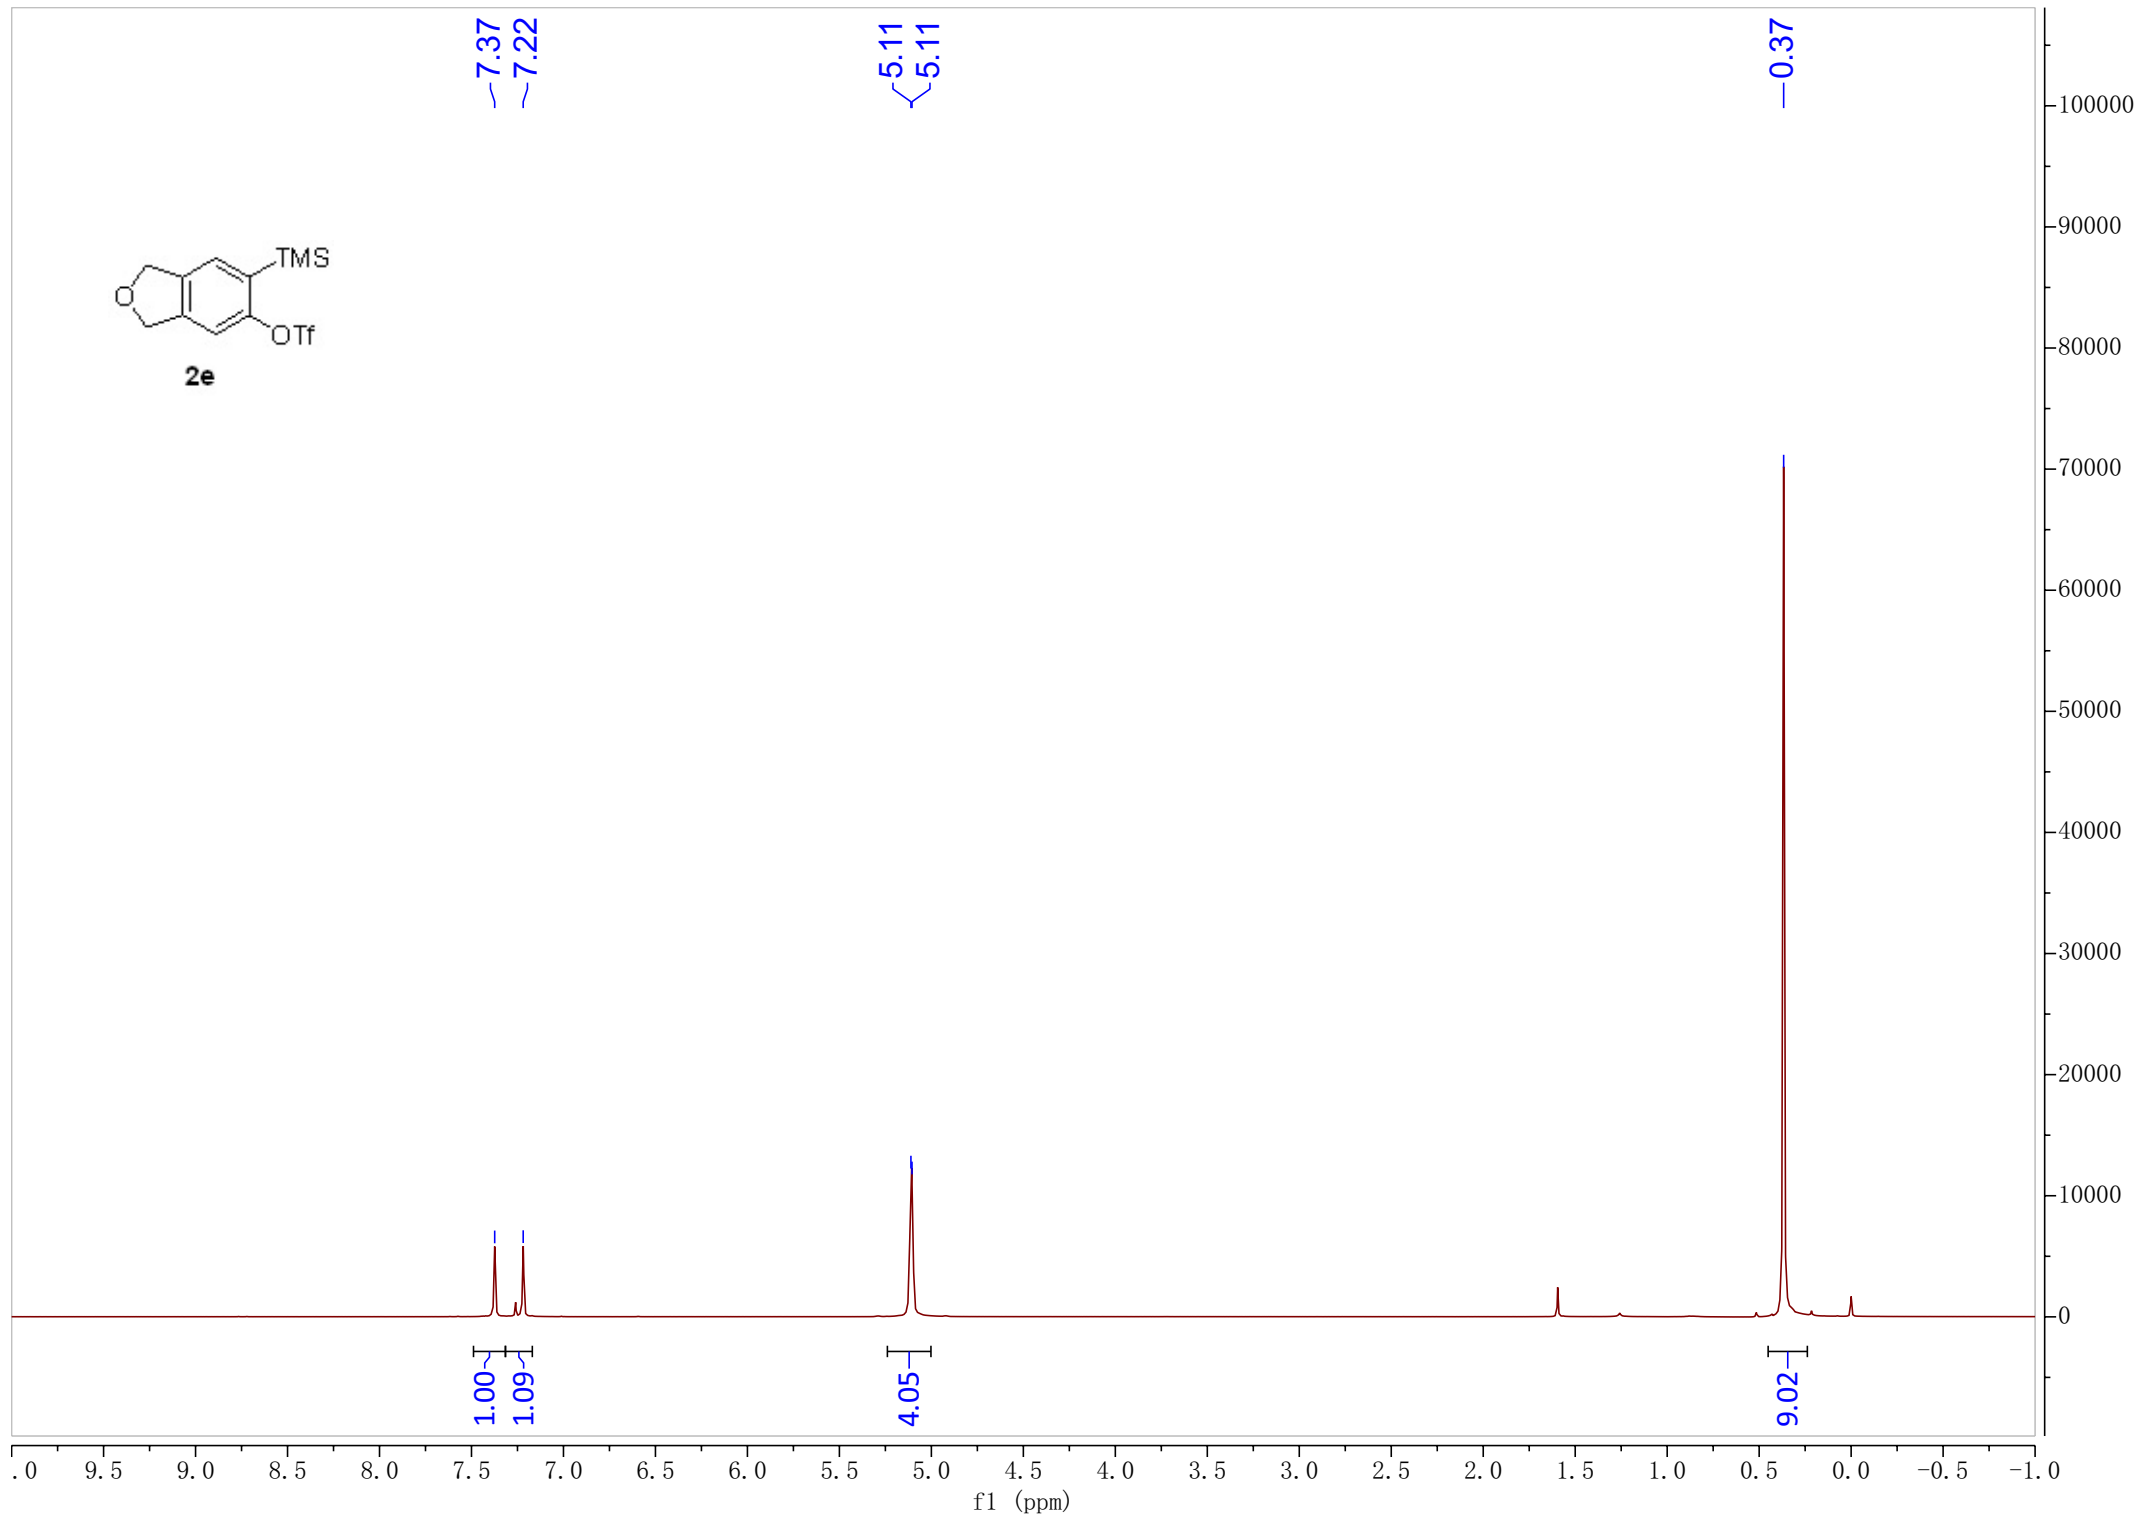

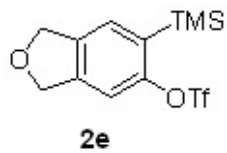

154.52  
143.19  
138.49  
131.60  
128.20  
123.21  
120.03  
116.85  
113.67  
112.63  
112.62

73.23  
73.00

-0.84

190 180 170 160 150 140 130 120 110 100 90 80 70 60 50 40 30 20 10 0 -10 -20

f1 (ppm)  
S127

120000  
110000  
100000  
90000  
80000  
70000  
60000  
50000  
40000  
30000  
20000  
10000  
0  
-10000

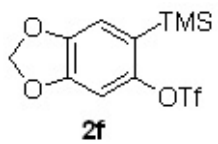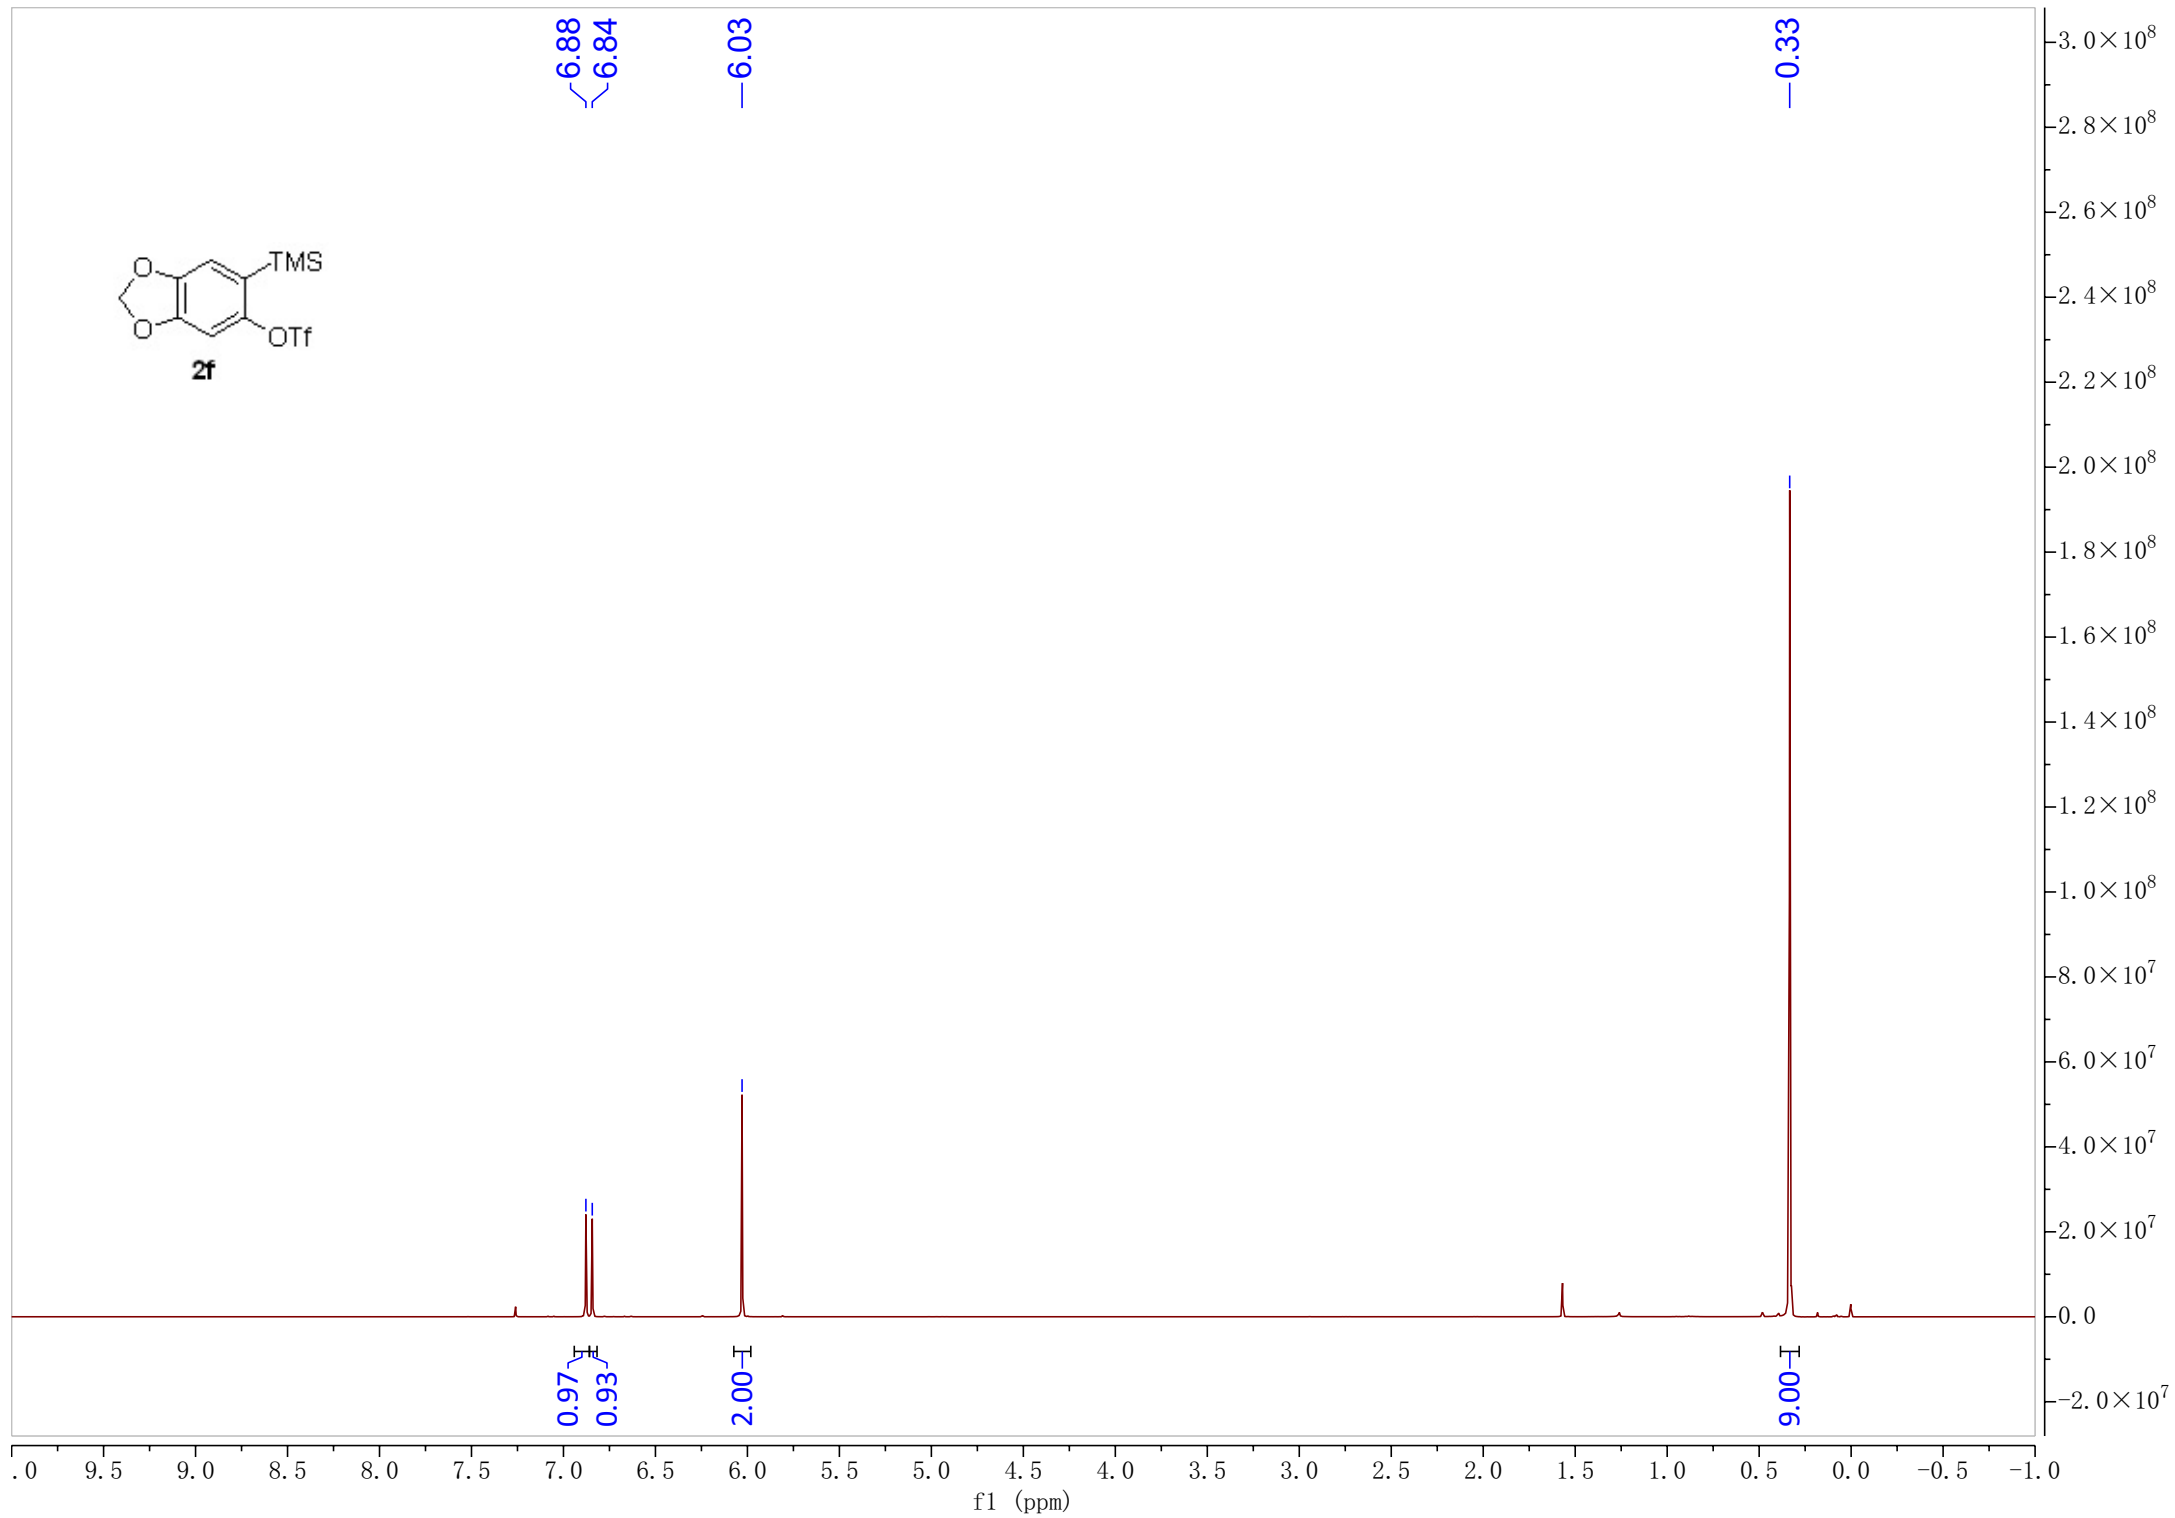



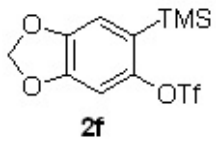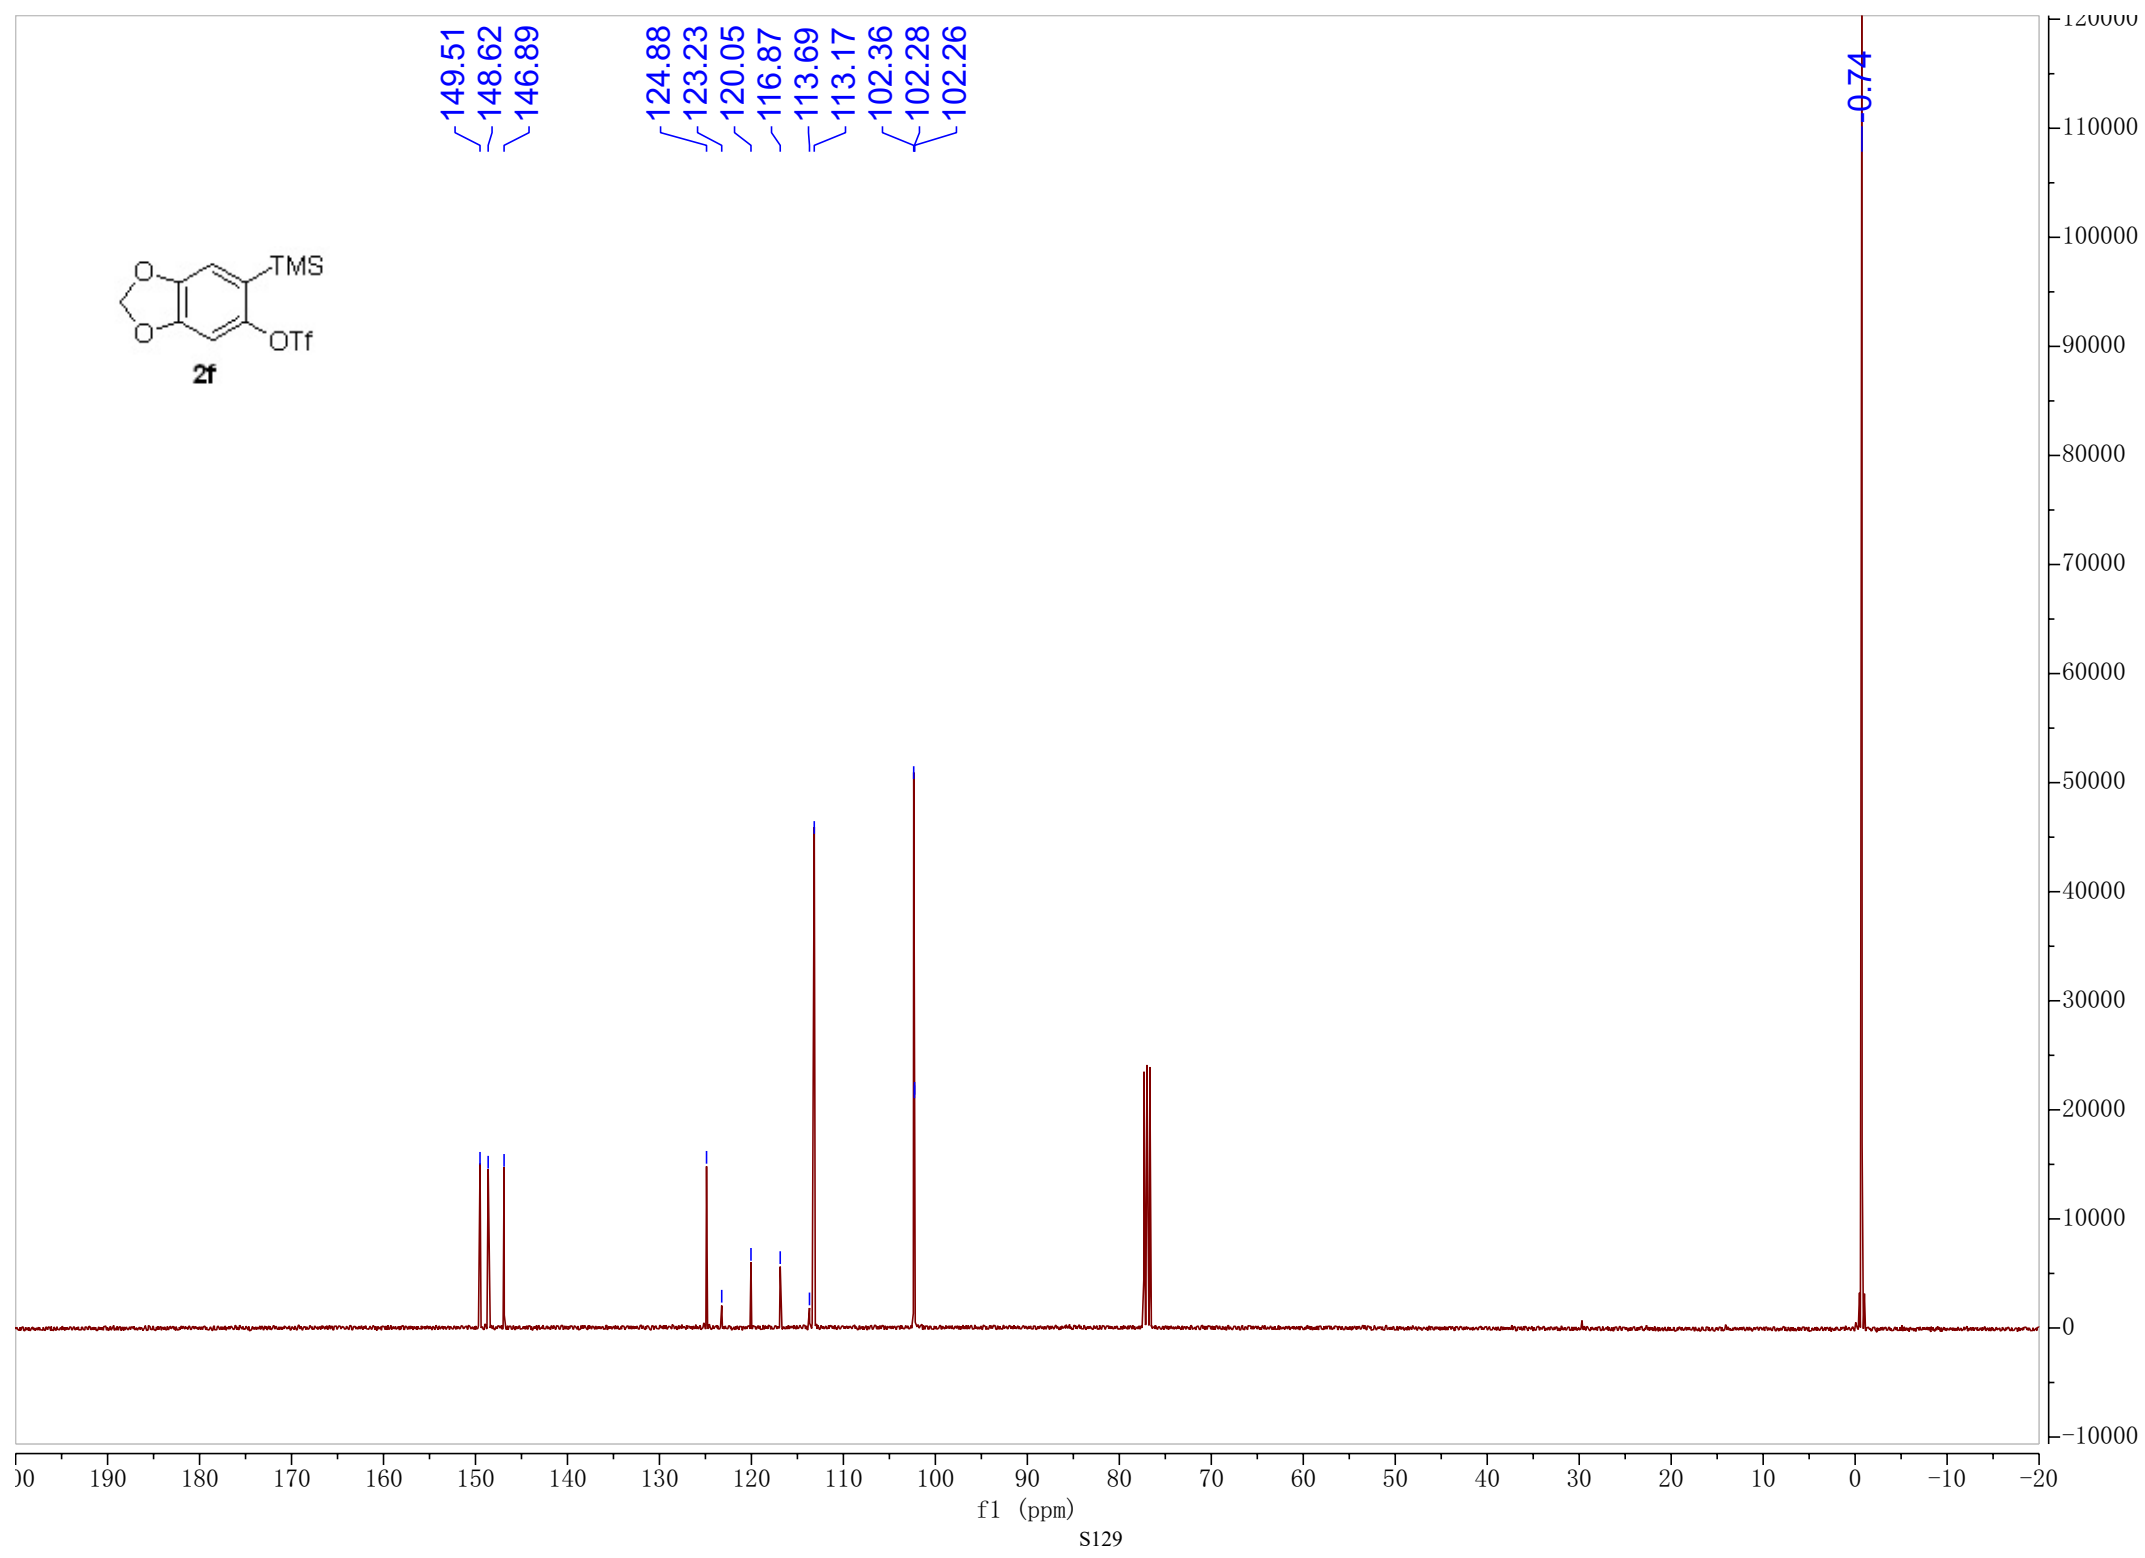

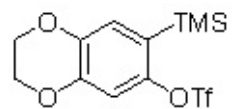

**2g**

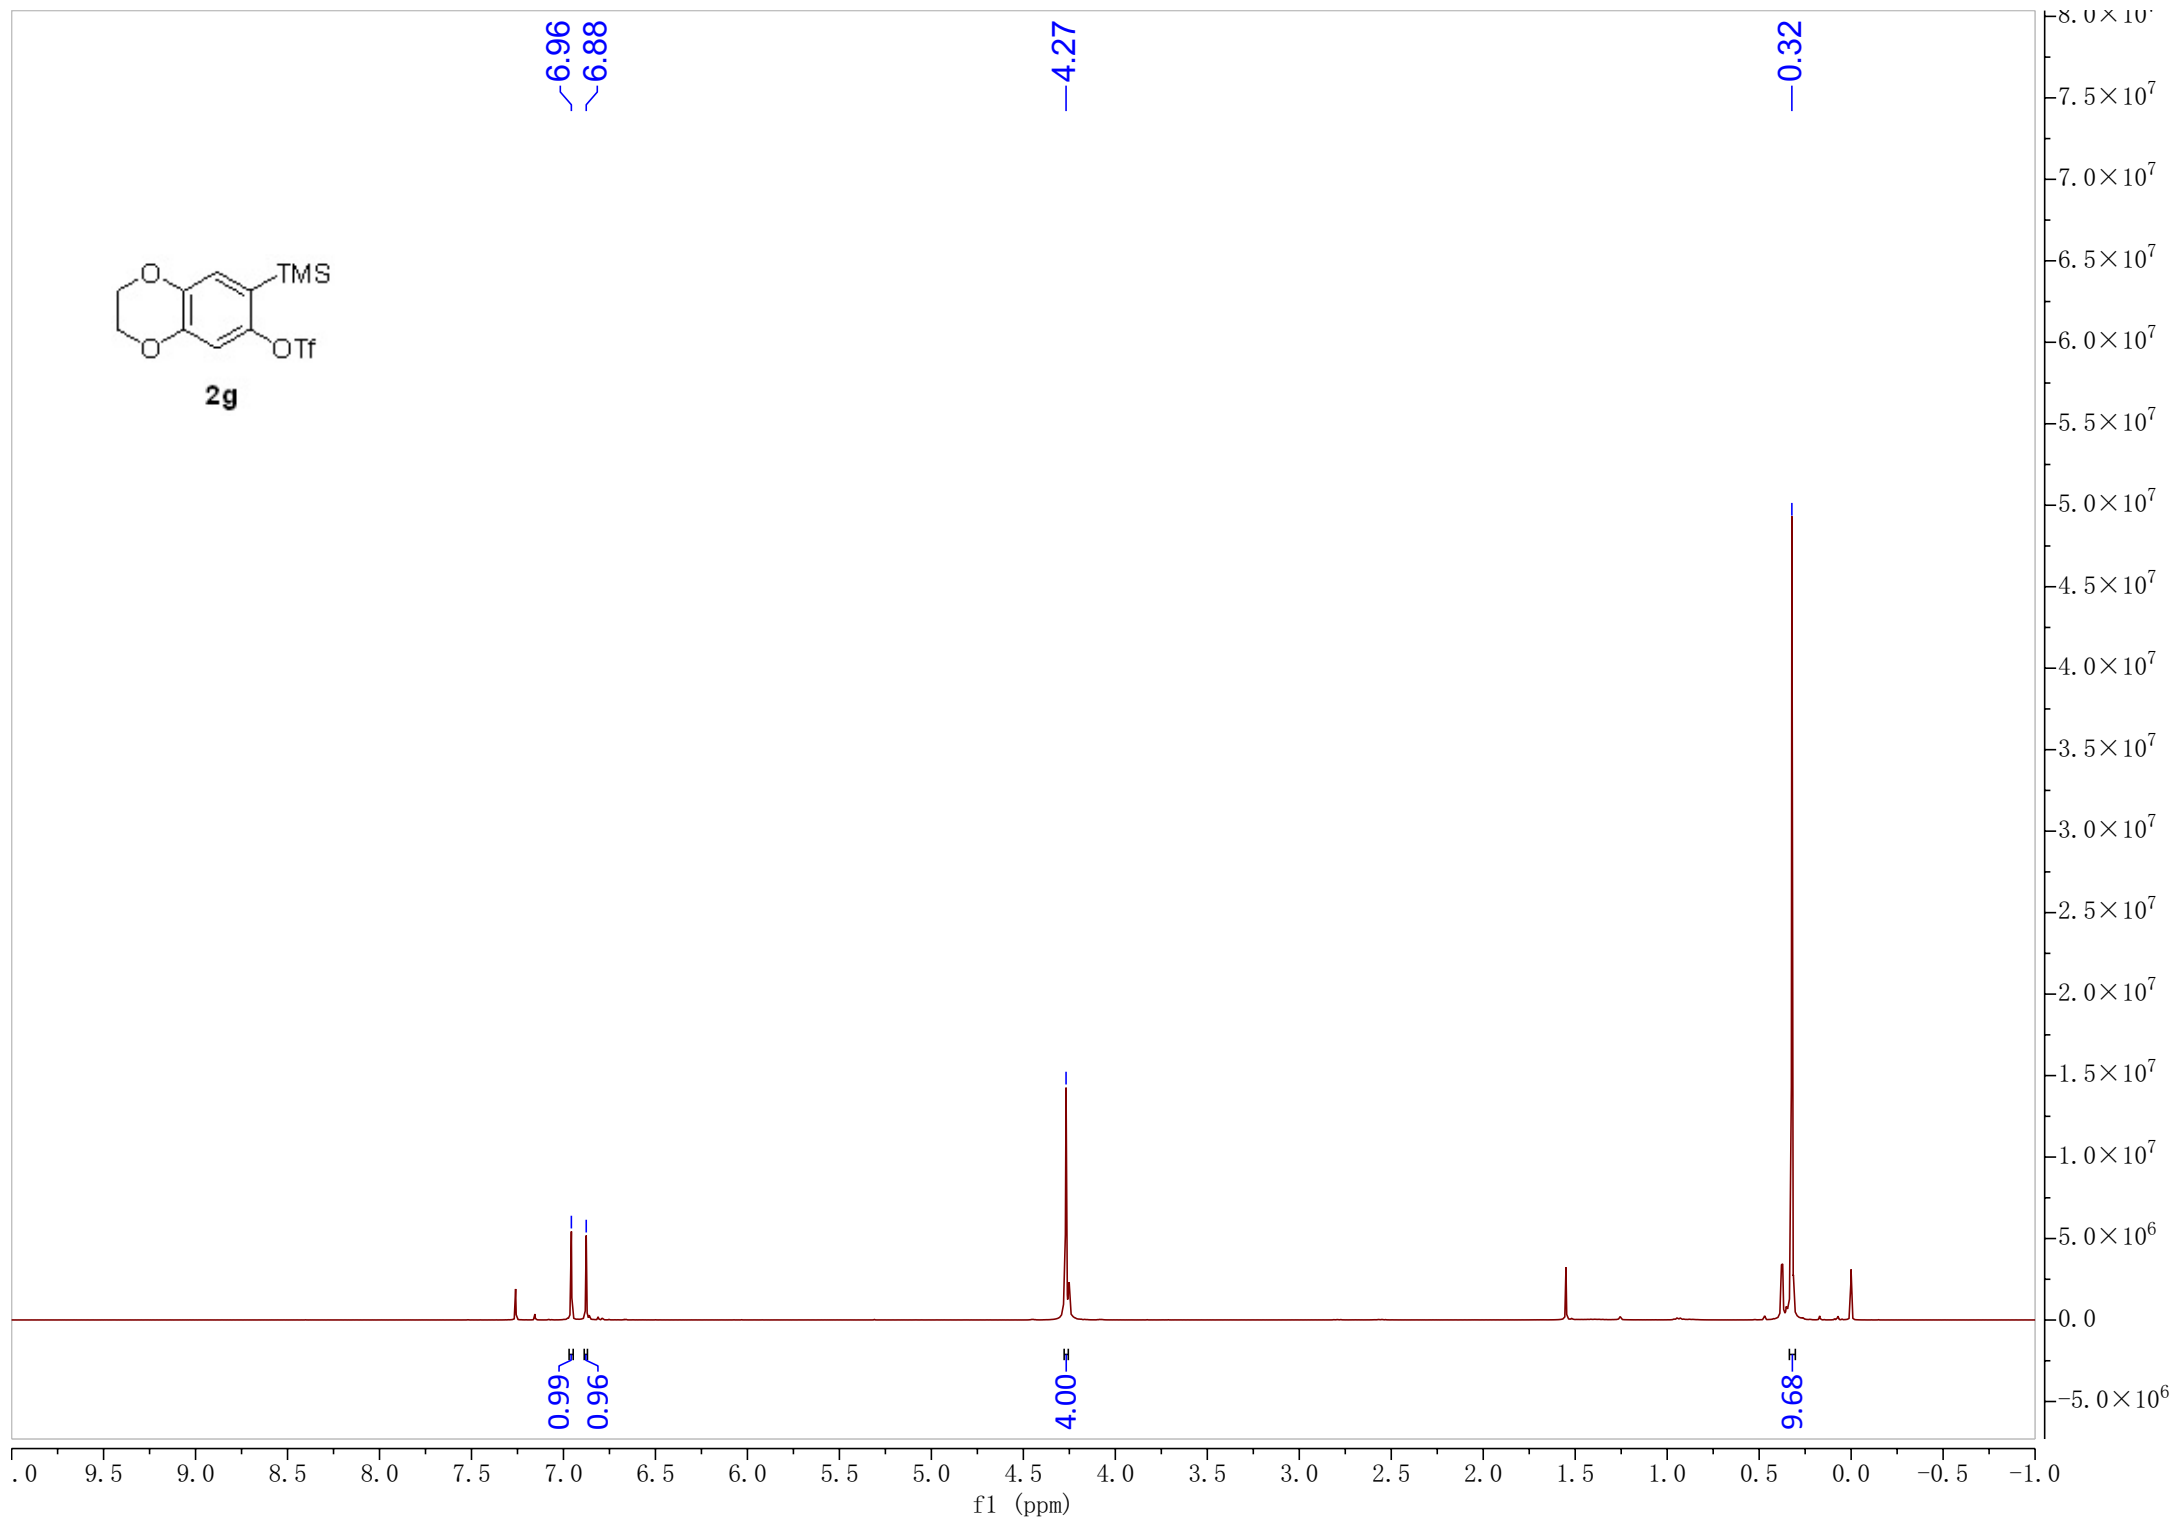

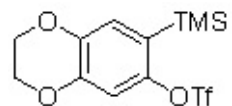

**2g**

147.98  
144.78  
142.66  
124.72  
123.55  
123.14  
120.05  
116.87  
113.69  
109.44  
109.43  
109.41

64.48  
64.18

-0.77

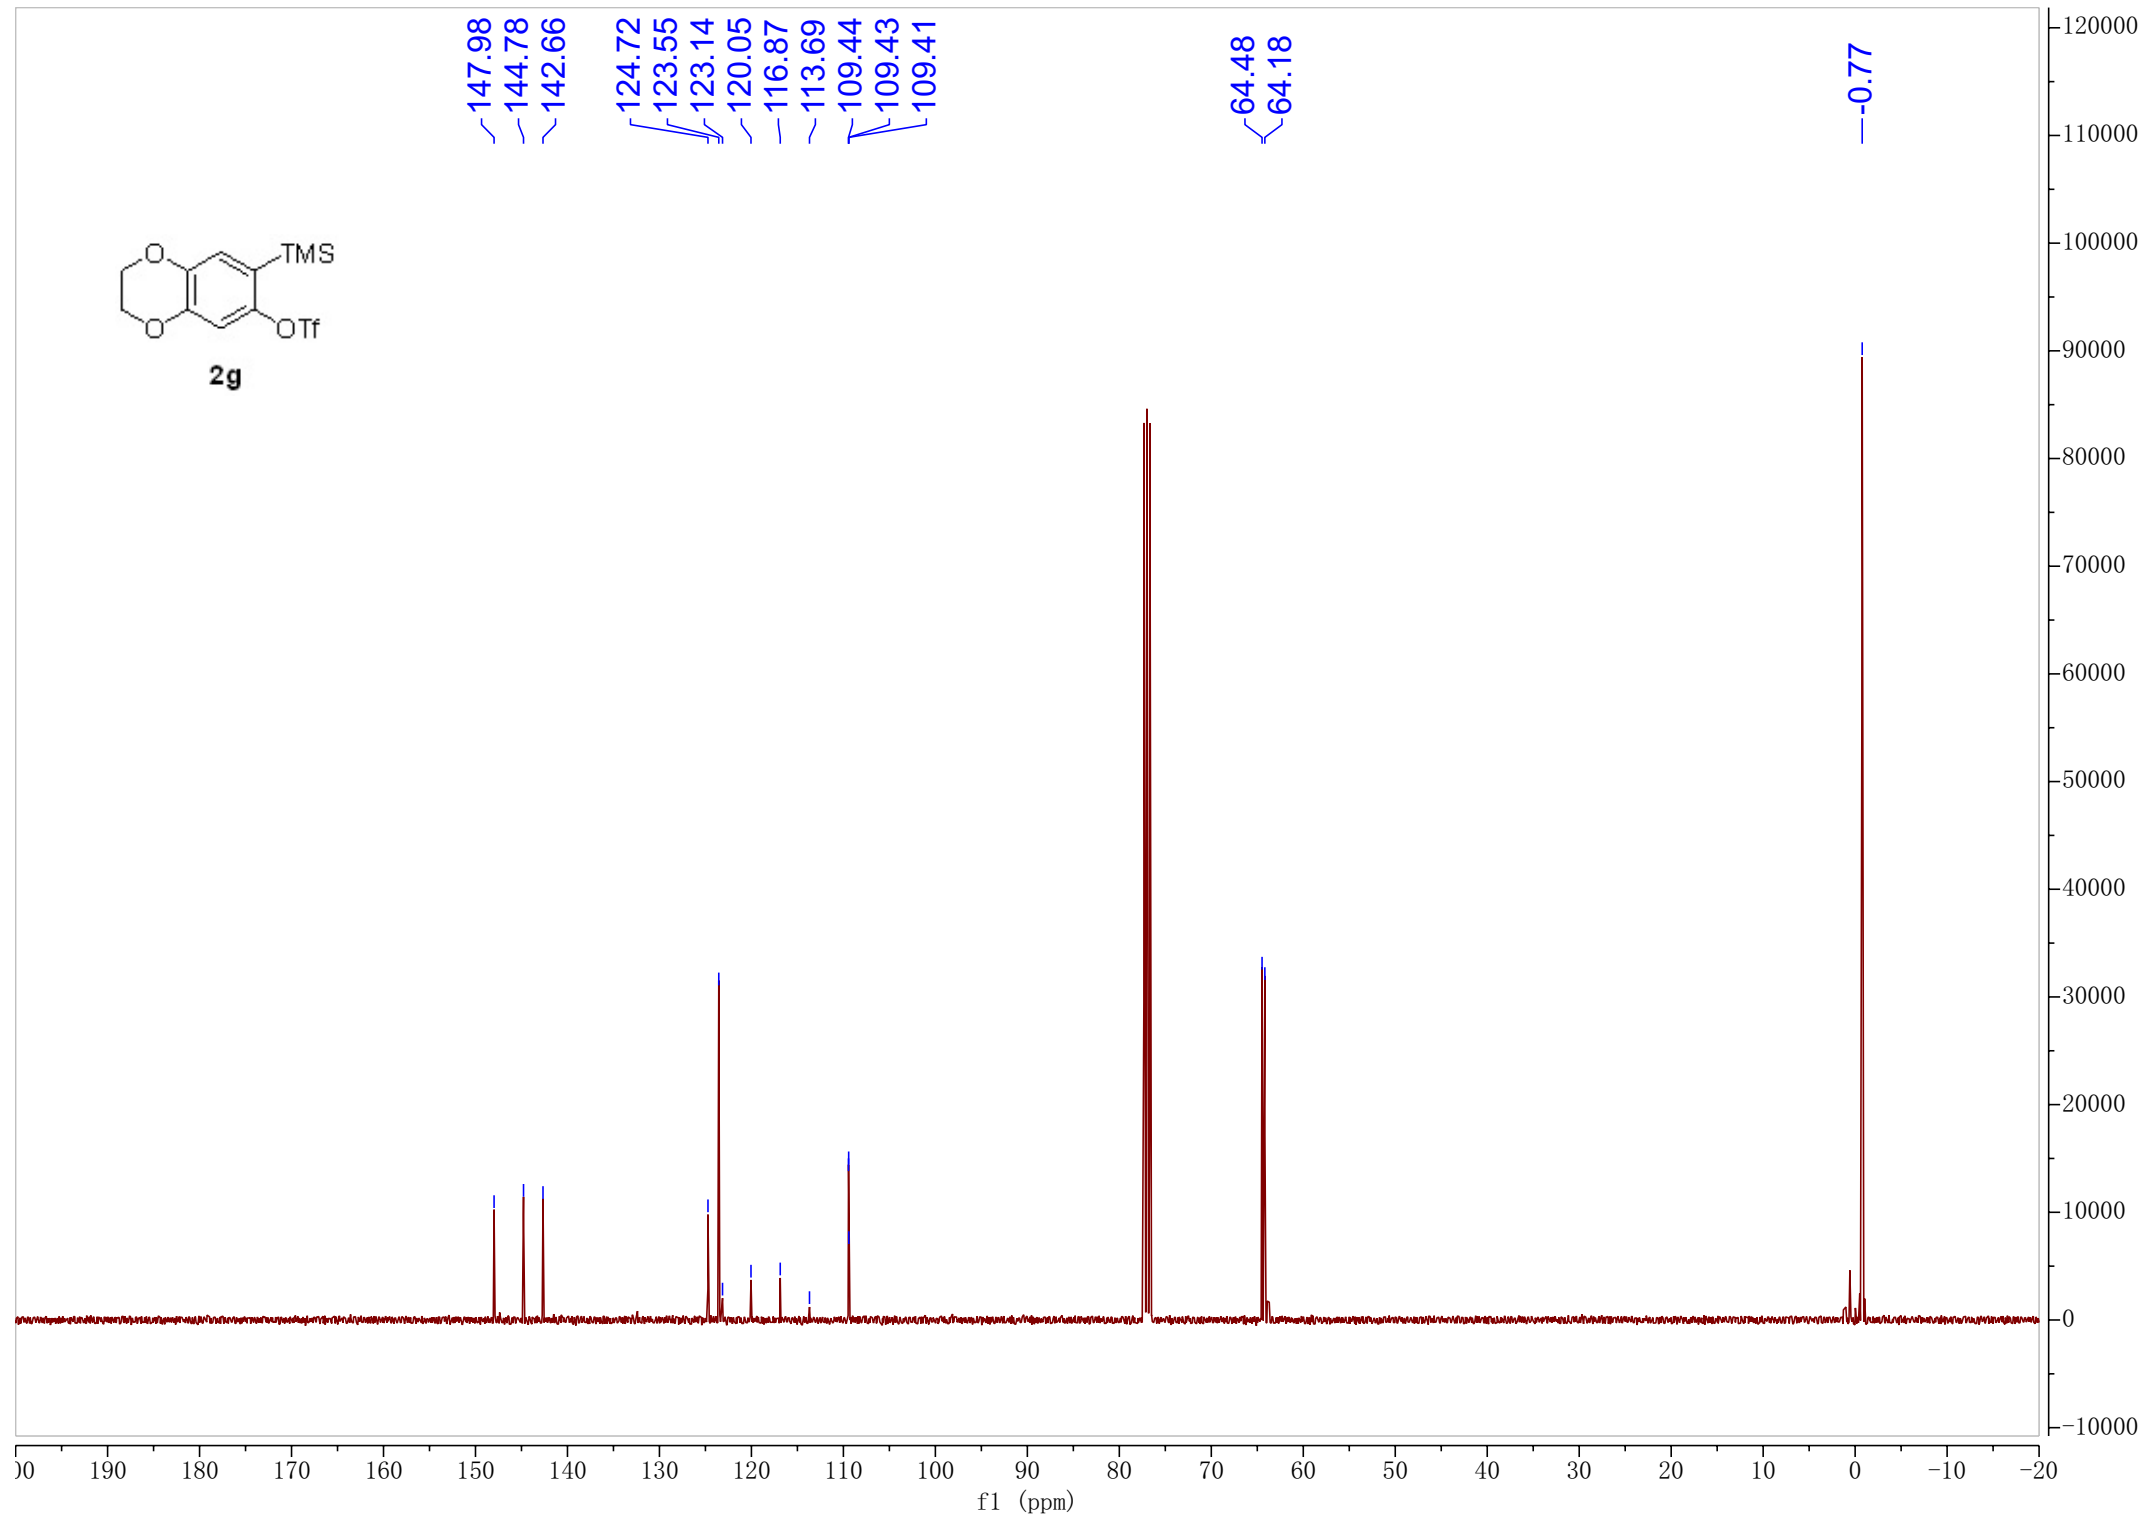

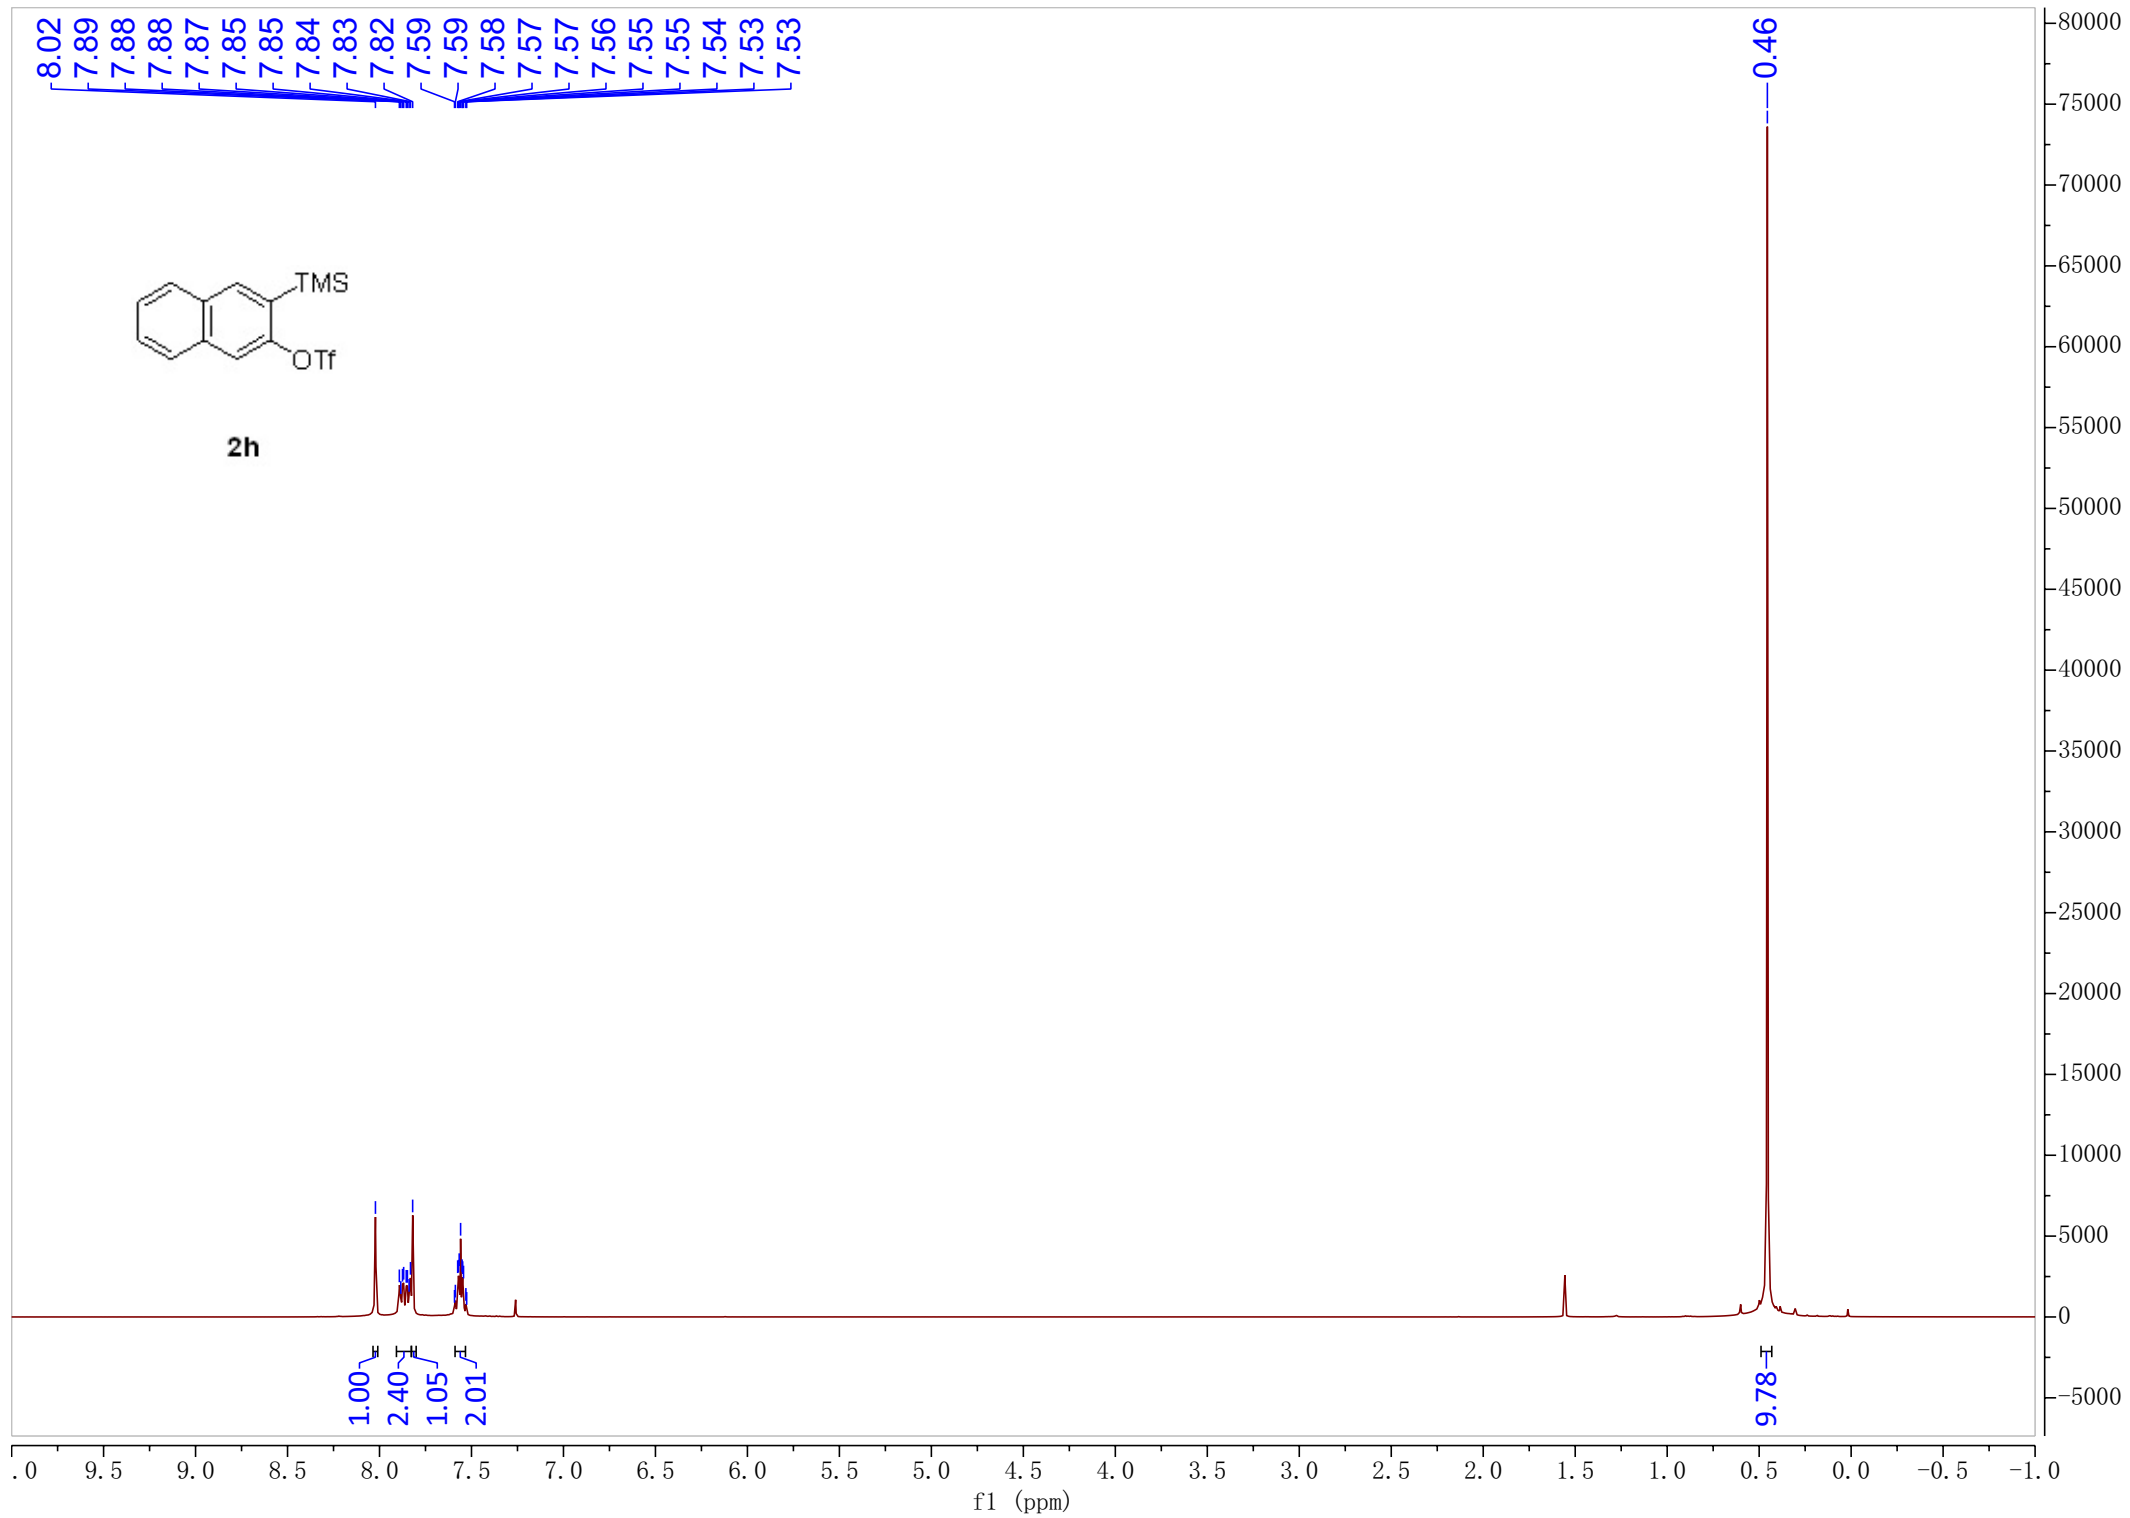

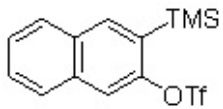

**2h**

152.54  
137.51  
134.10  
131.77  
131.03  
127.94  
127.75  
127.74  
126.92  
123.35  
120.17  
116.99  
116.49  
116.47  
113.81

-0.75

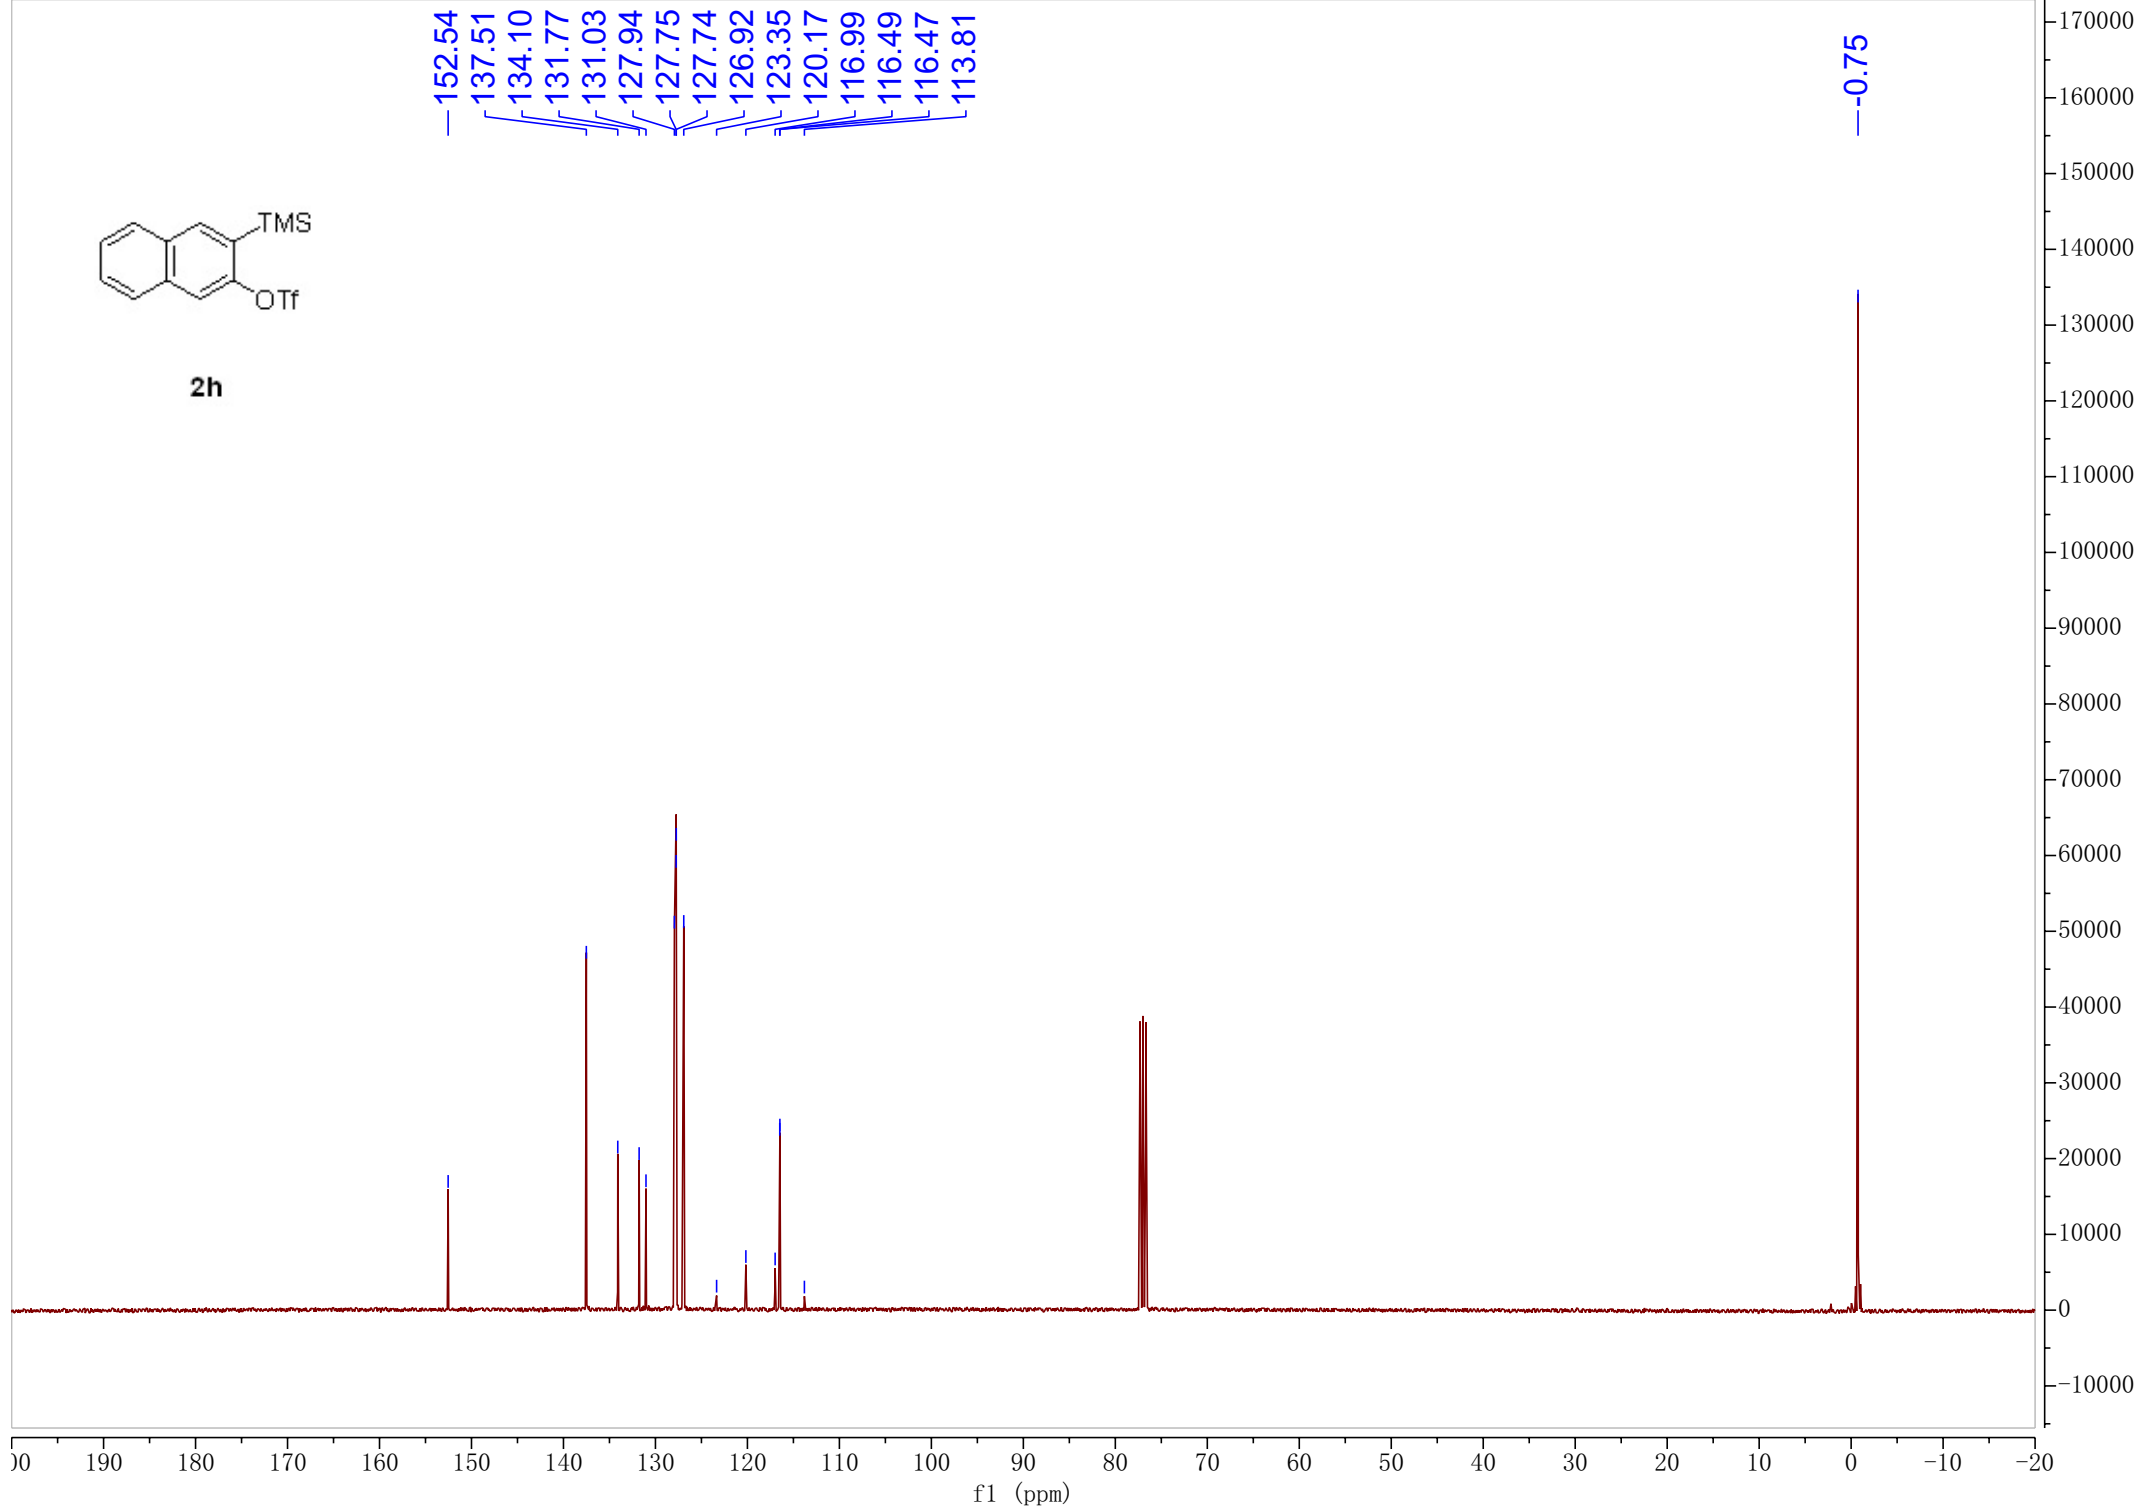





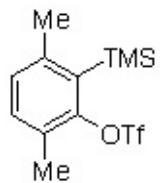

7.18  
7.16  
7.09  
7.07

2.47  
2.32

0.44

1.00  
1.03

3.15  
3.20

9.48

f1 (ppm)

S136

$1.70 \times 10^8$   
 $1.60 \times 10^8$   
 $1.50 \times 10^8$   
 $1.40 \times 10^8$   
 $1.30 \times 10^8$   
 $1.20 \times 10^8$   
 $1.10 \times 10^8$   
 $1.00 \times 10^8$   
 $9.00 \times 10^7$   
 $8.00 \times 10^7$   
 $7.00 \times 10^7$   
 $6.00 \times 10^7$   
 $5.00 \times 10^7$   
 $4.00 \times 10^7$   
 $3.00 \times 10^7$   
 $2.00 \times 10^7$   
 $1.00 \times 10^7$   
0.00  
 $-1.00 \times 10^7$



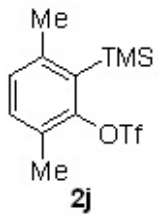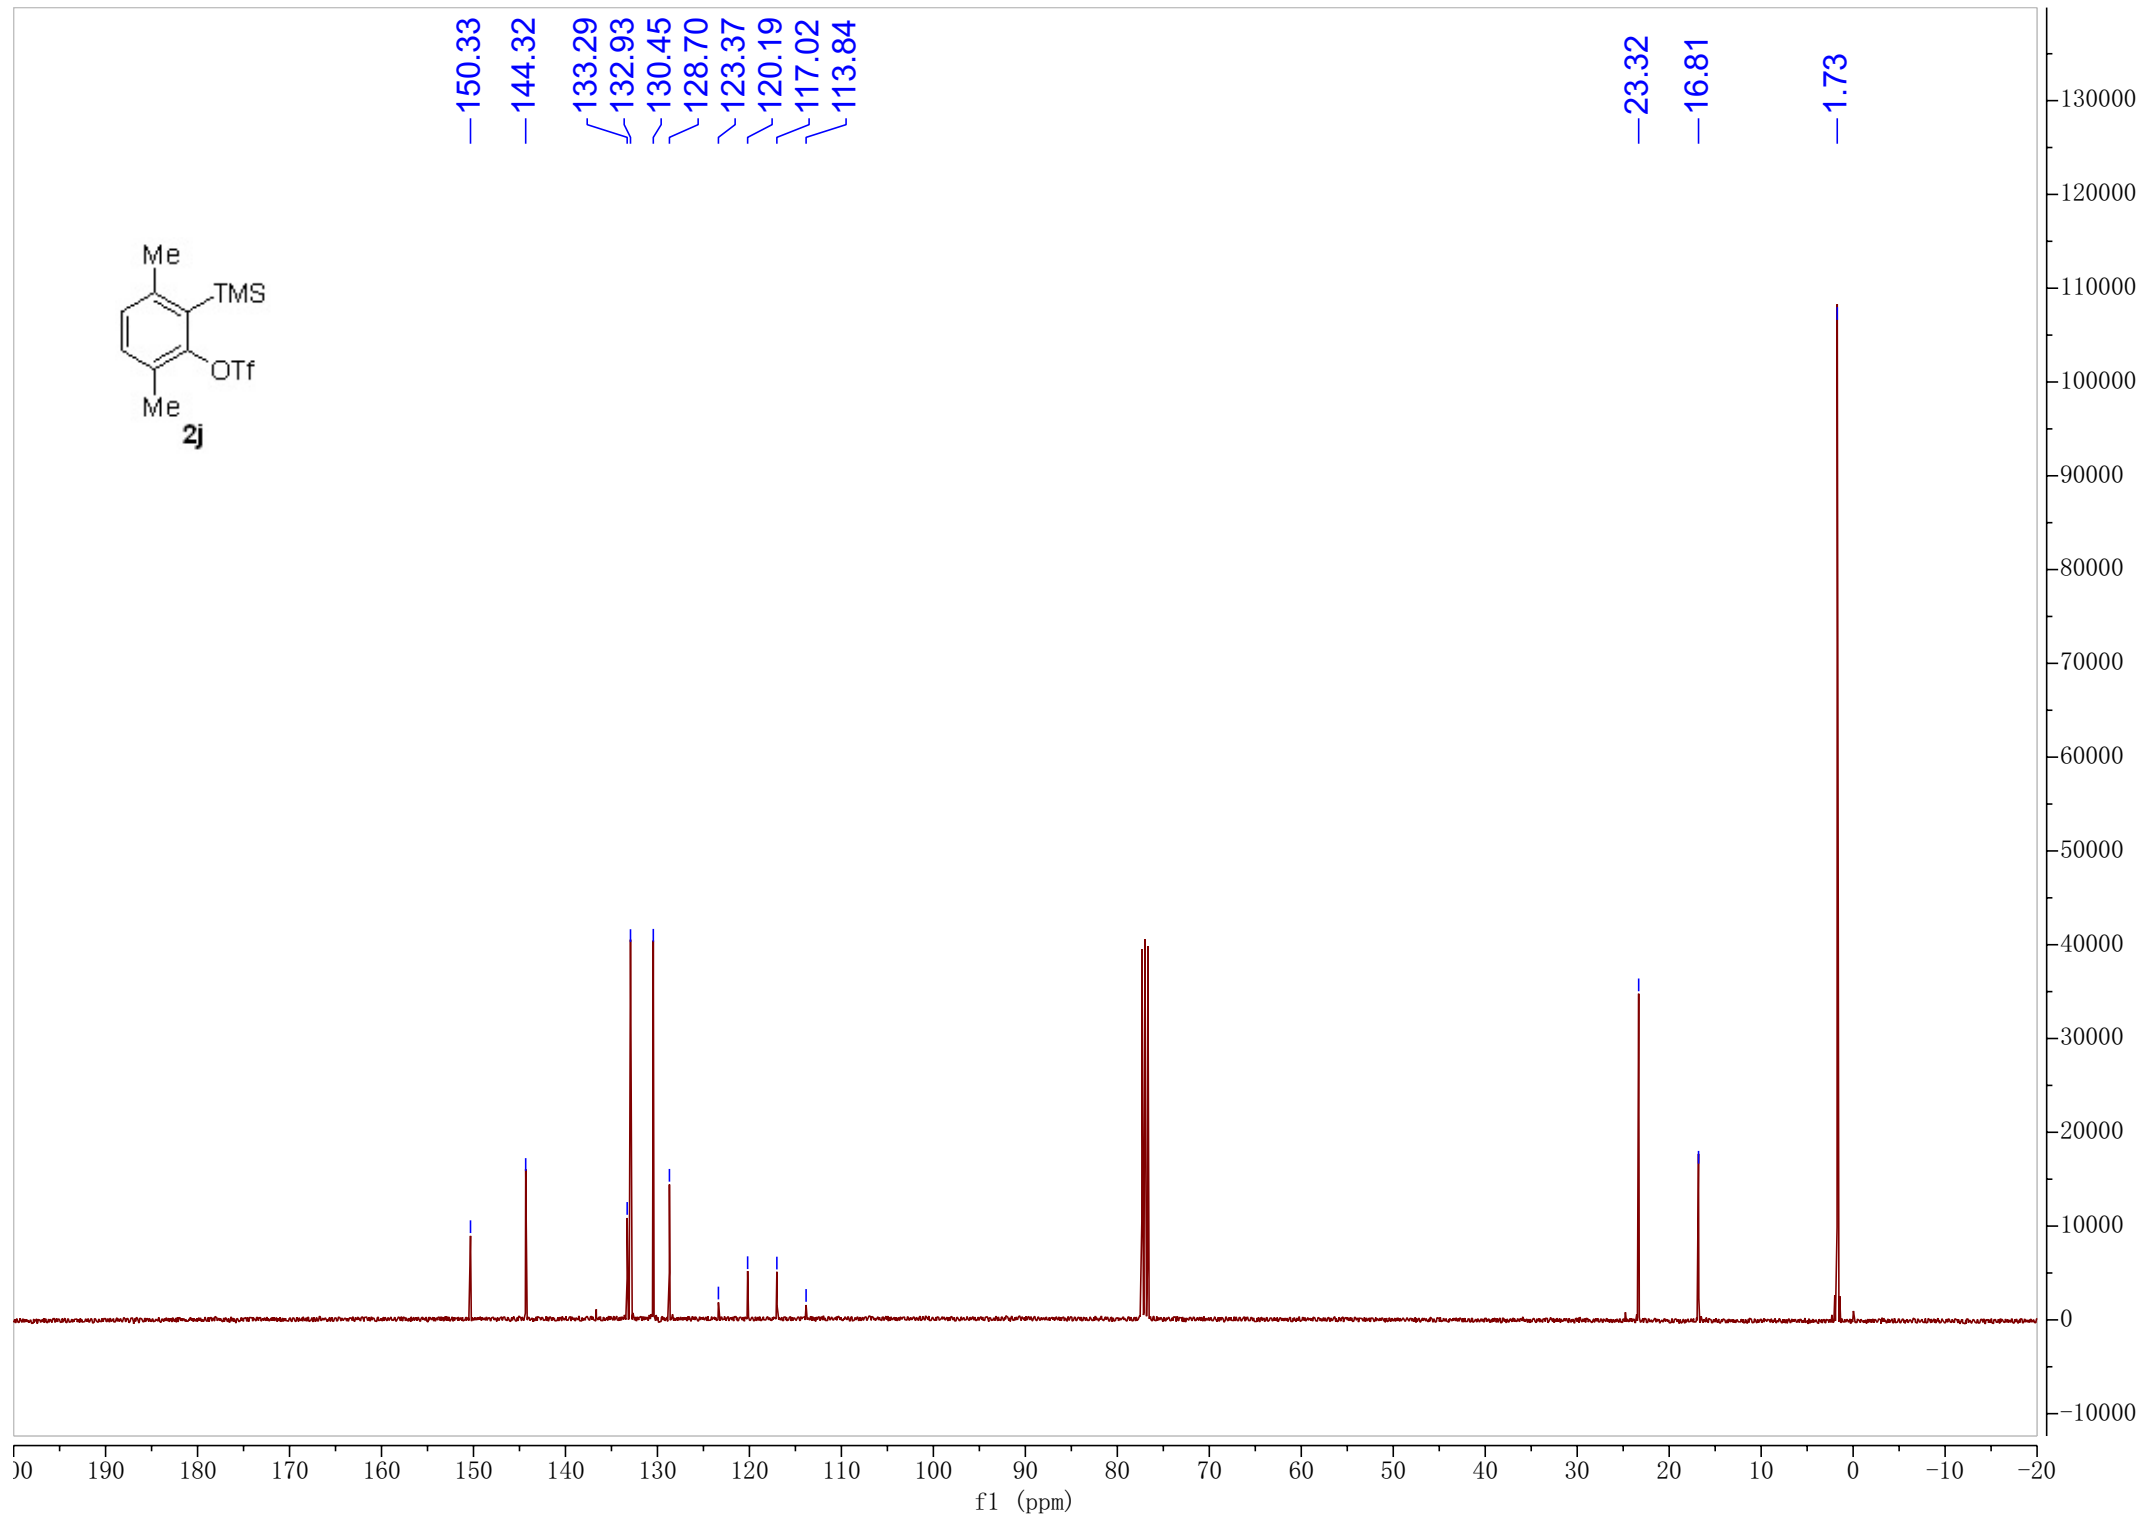

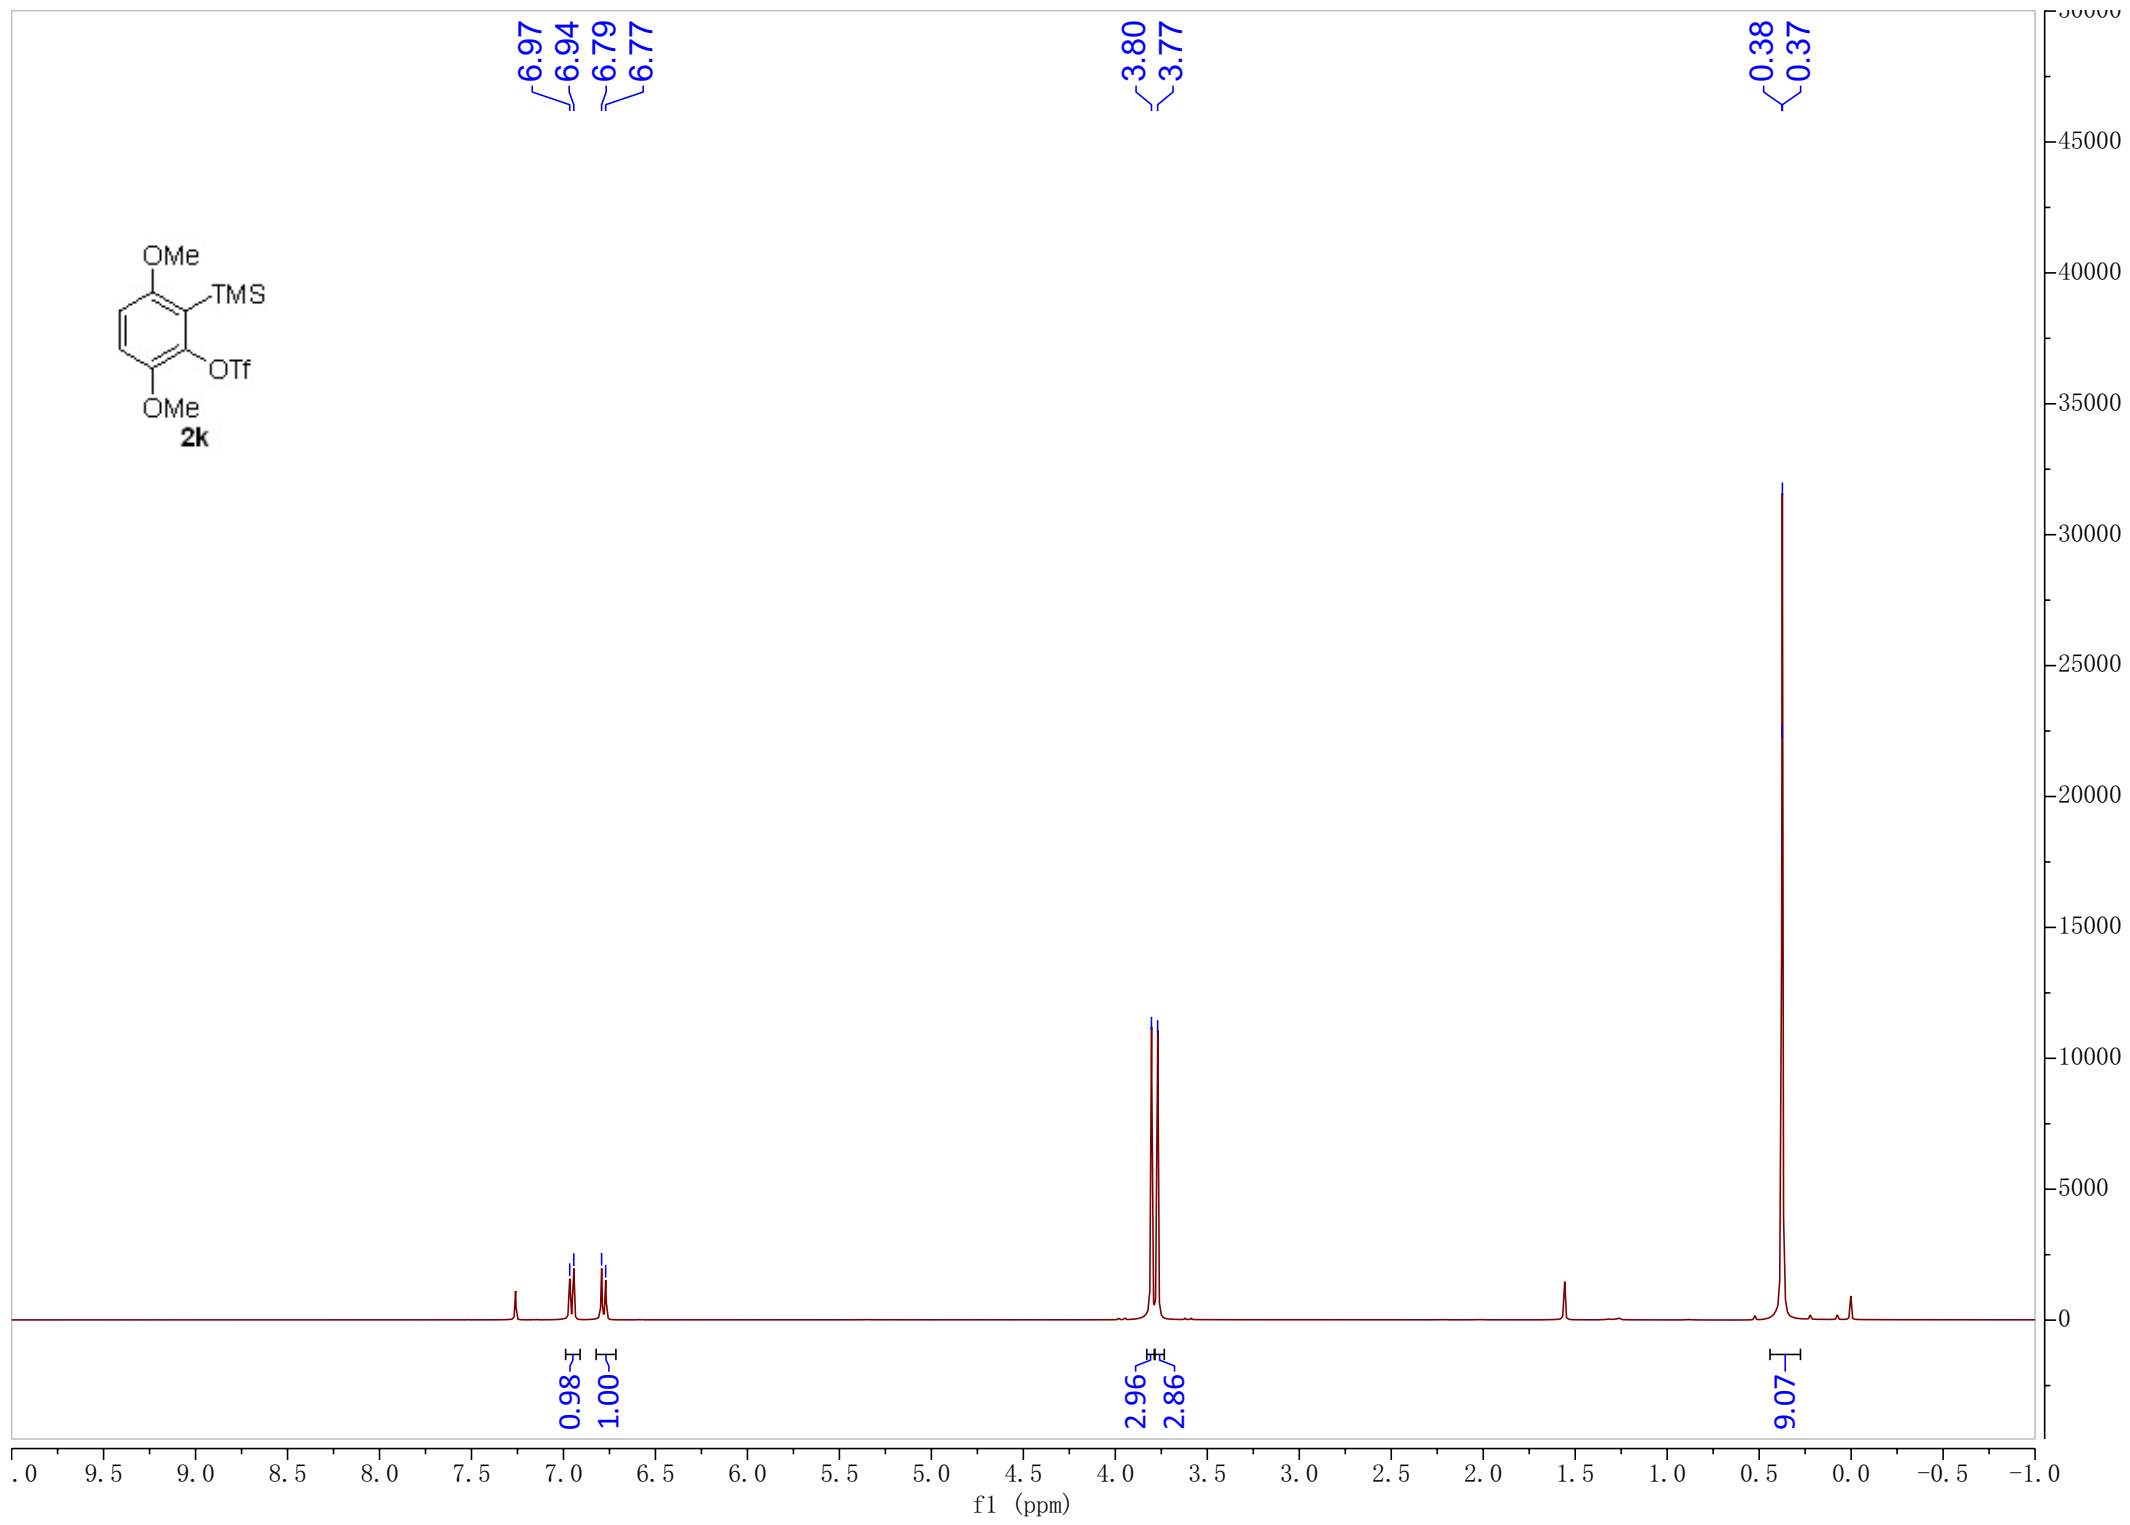

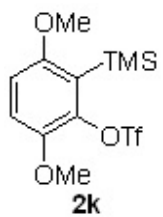

158.09

145.10

142.62

123.91

123.66

120.47

117.27

114.10

109.93

56.06

55.80

-0.71

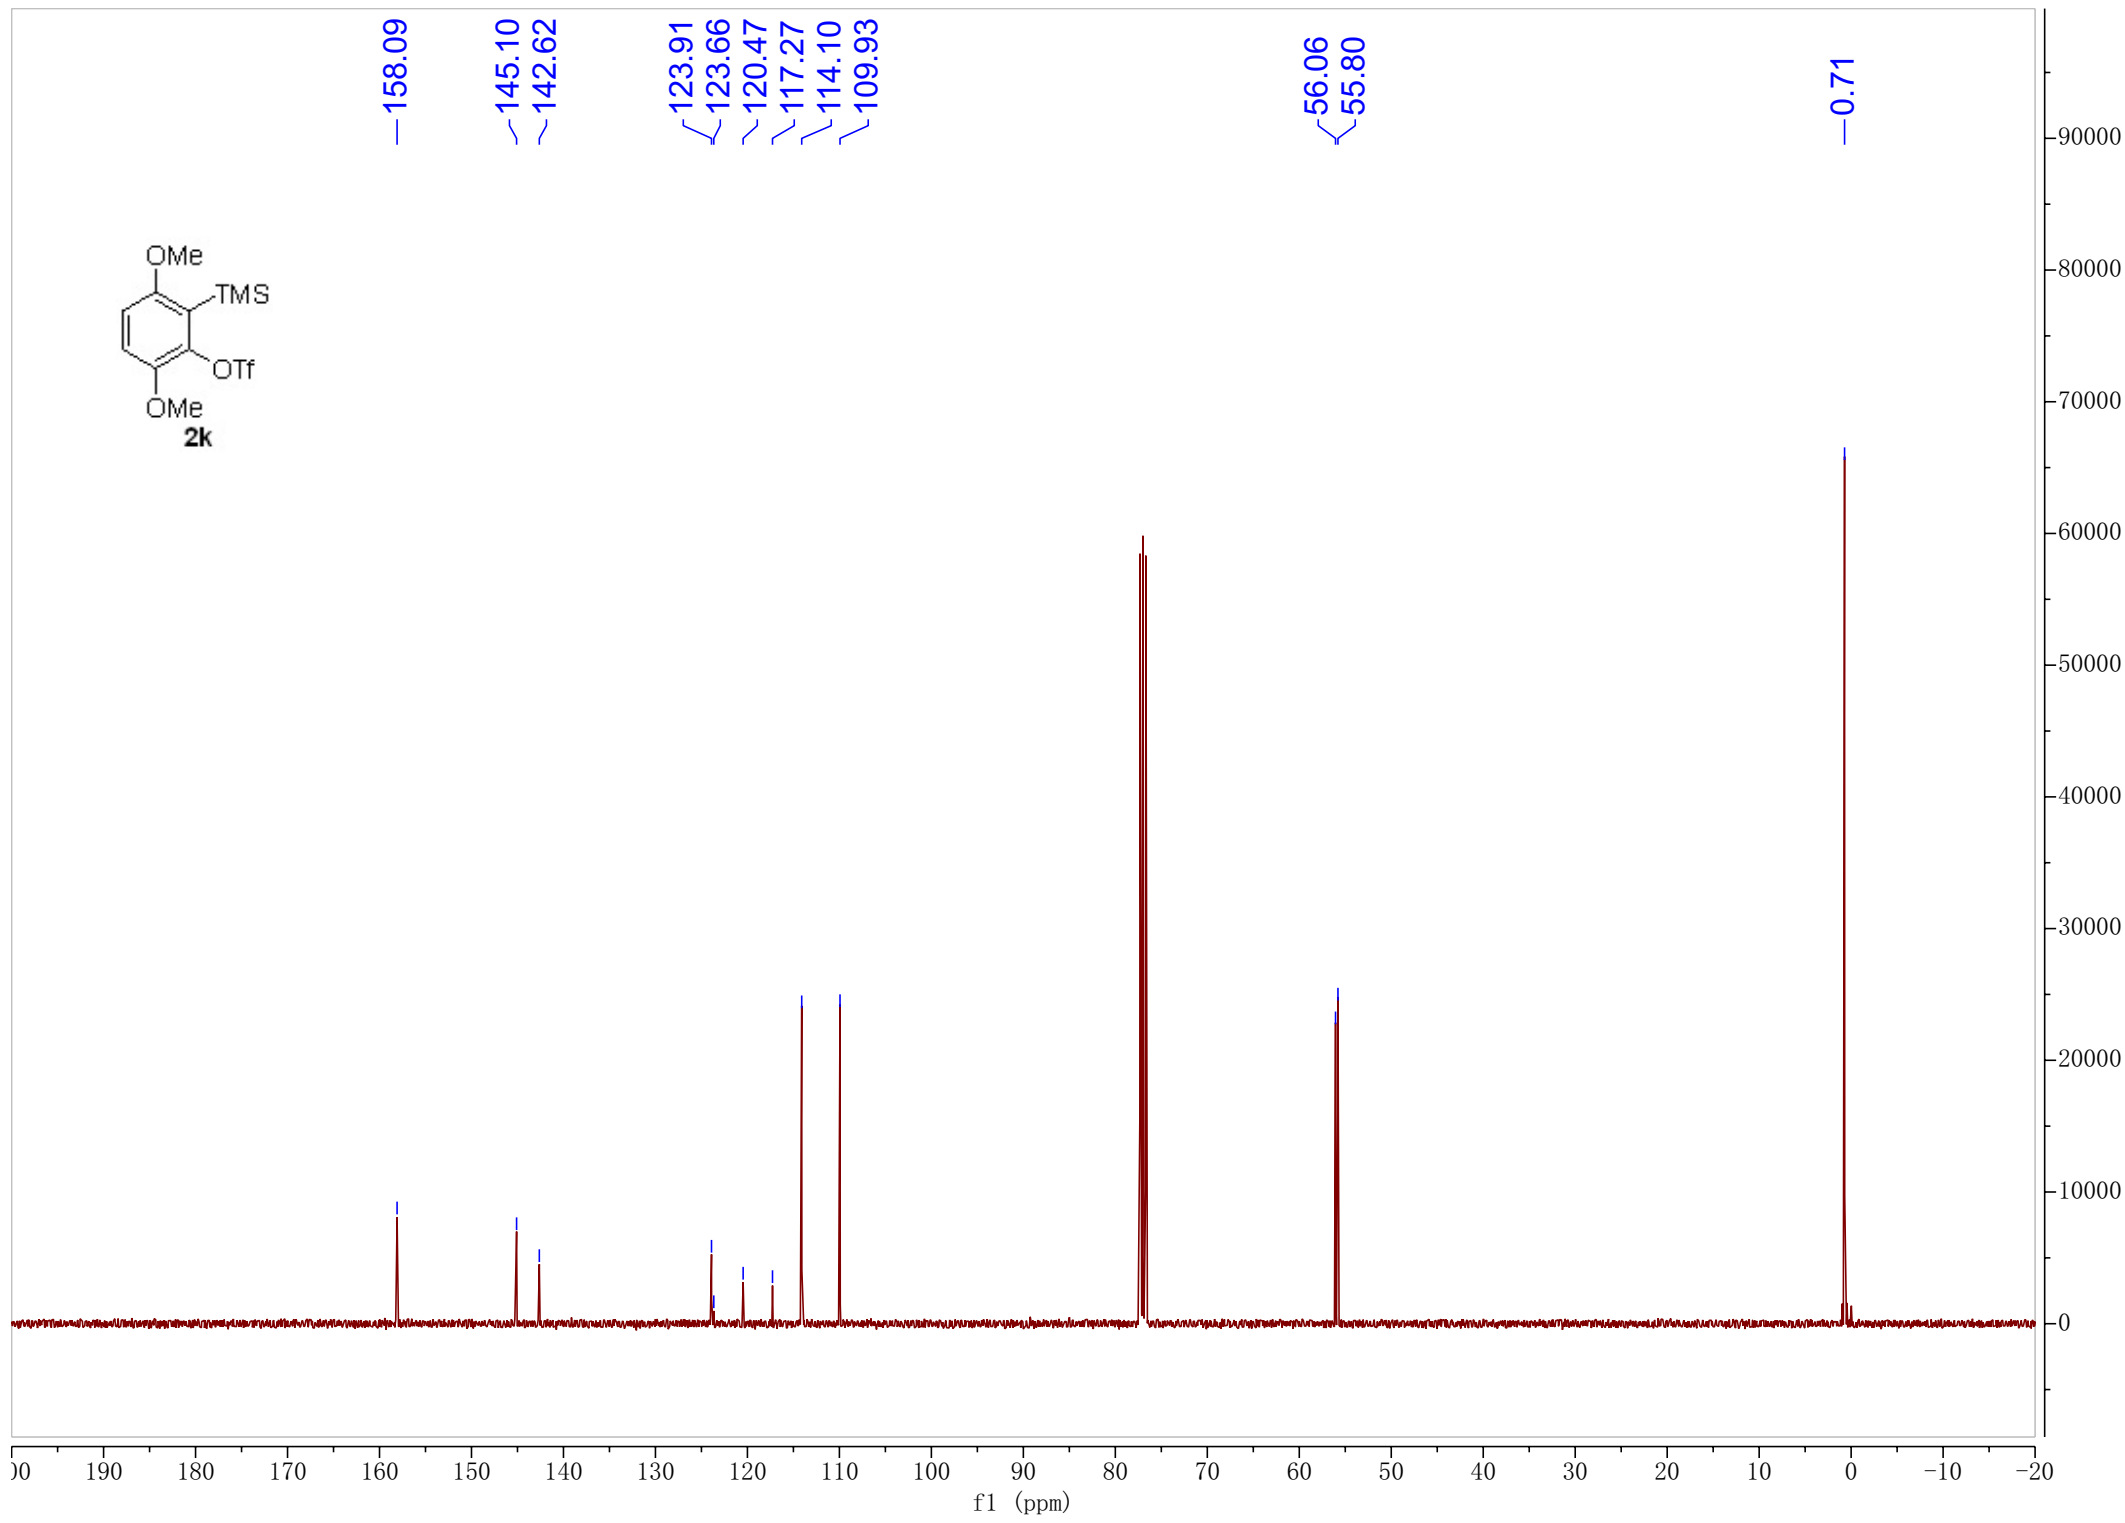

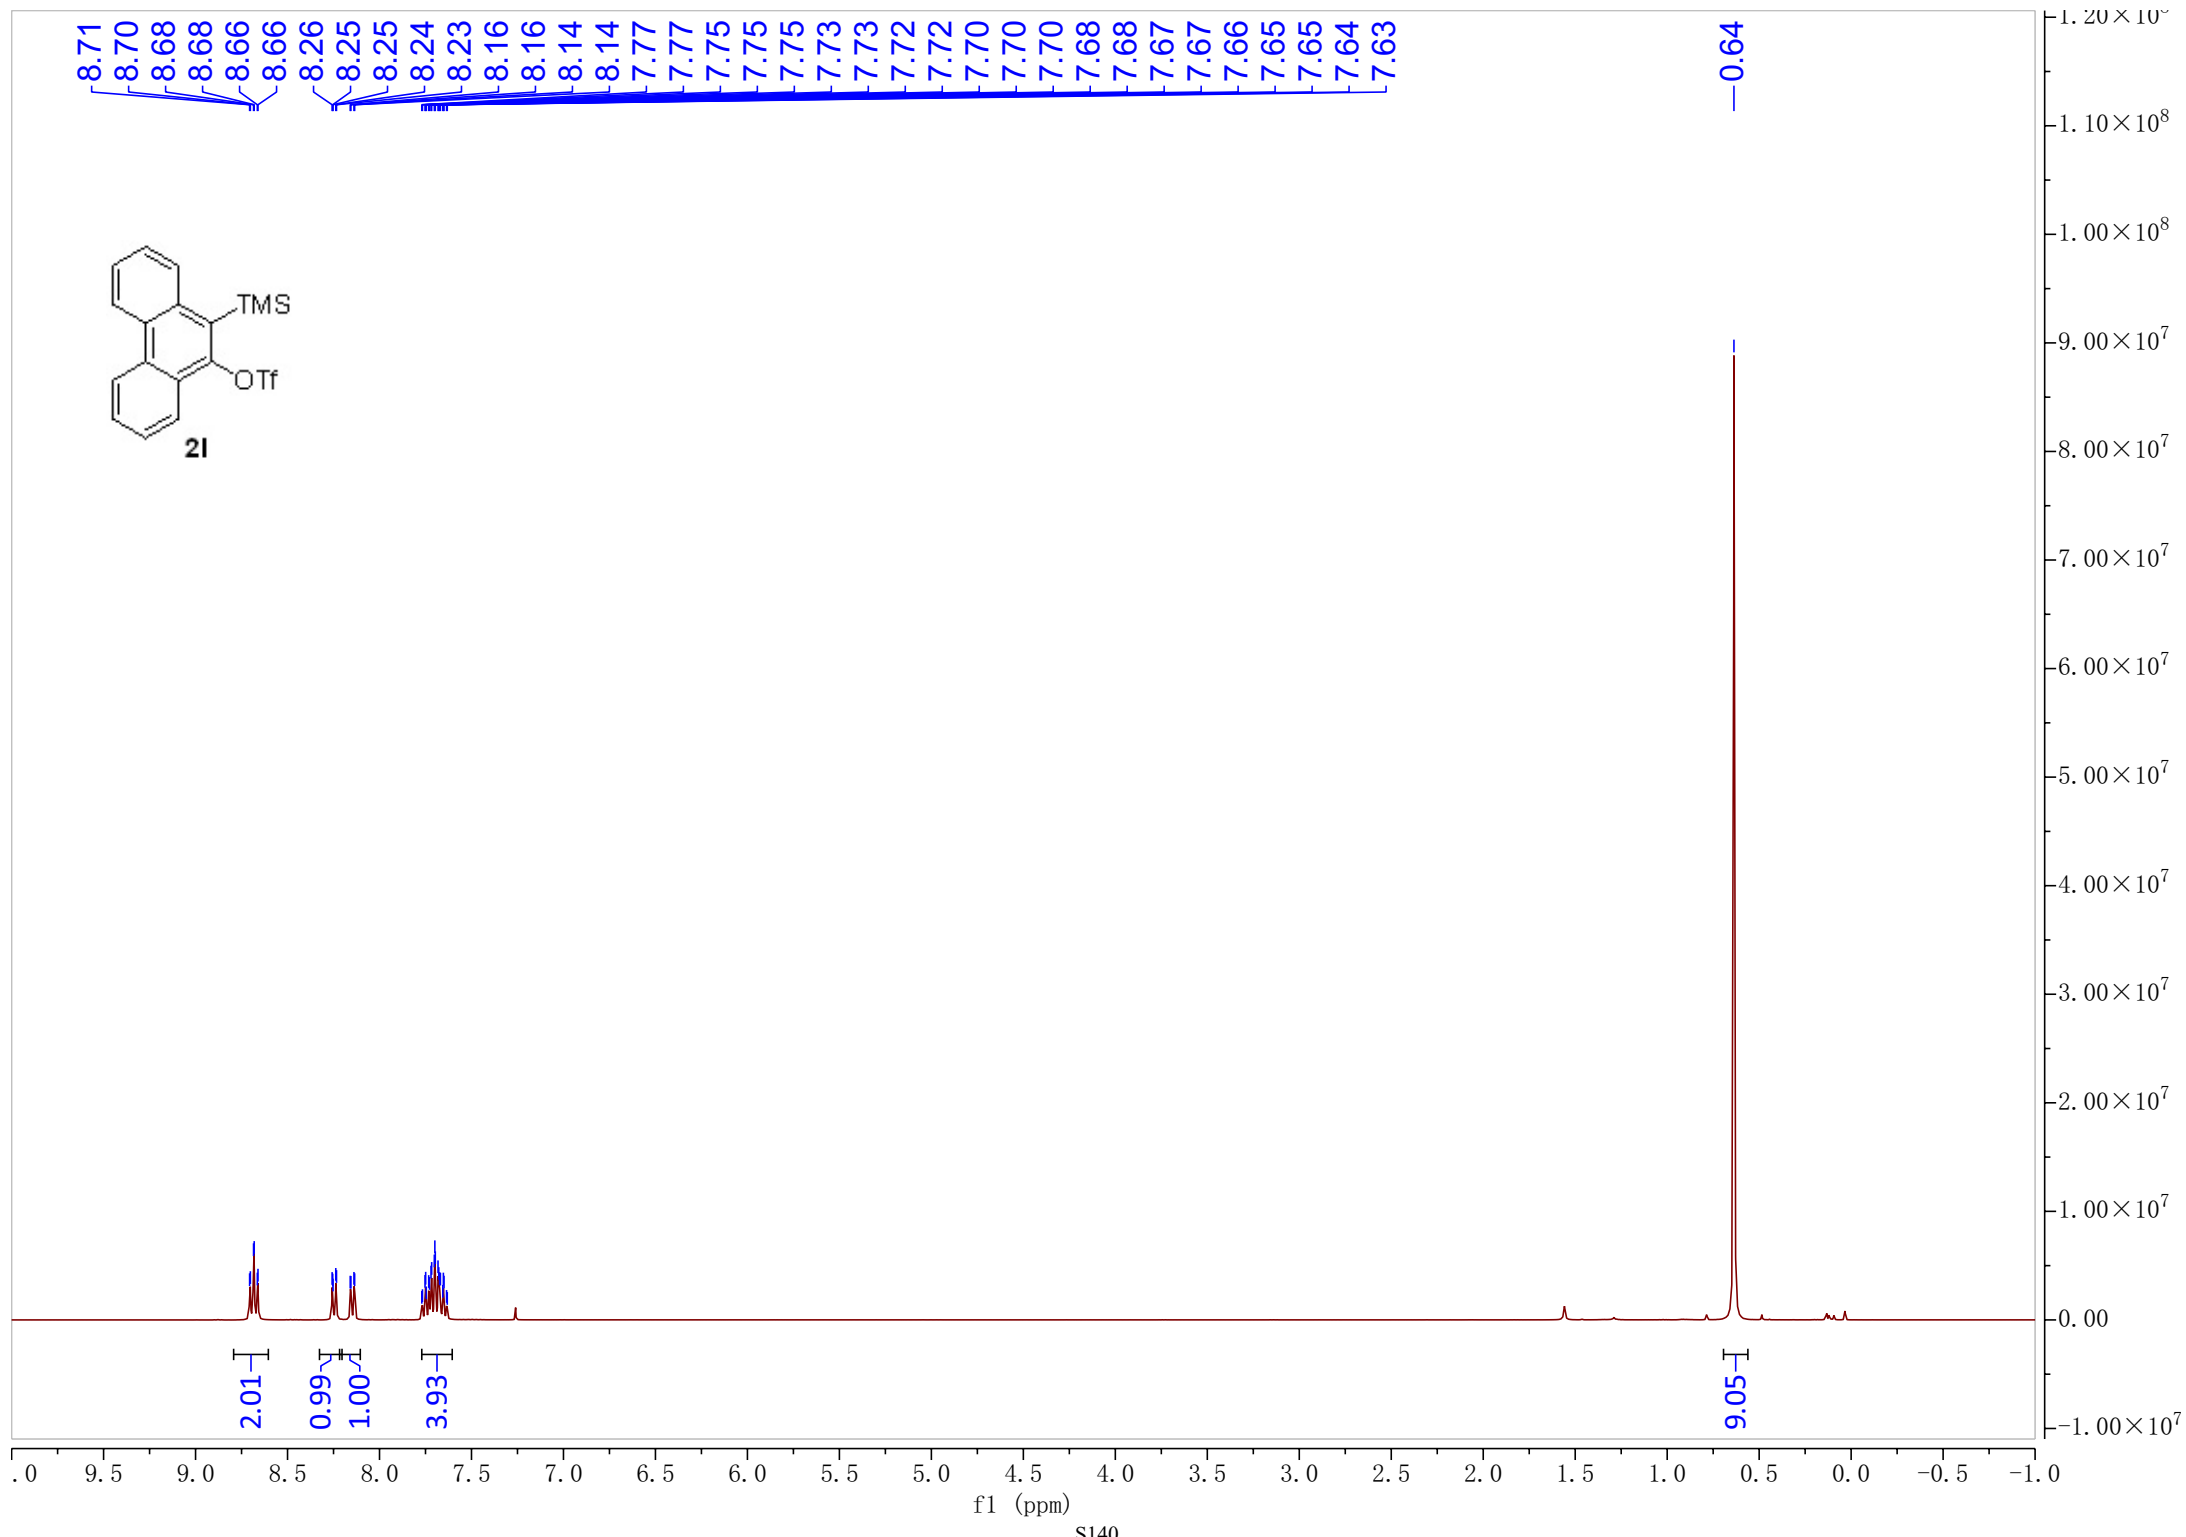

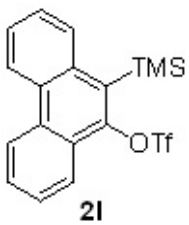

147.87  
134.63  
132.74  
130.50  
129.98  
129.70  
128.37  
127.30  
127.09  
126.63  
125.79  
123.51  
123.33  
122.74  
122.22  
120.32  
117.14  
113.95

-2.23

190 180 170 160 150 140 130 120 110 100 90 80 70 60 50 40 30 20 10 0 -10 -20

f1 (ppm)

S141

190000  
180000  
170000  
160000  
150000  
140000  
130000  
120000  
110000  
100000  
90000  
80000  
70000  
60000  
50000  
40000  
30000  
20000  
10000  
0  
-10000

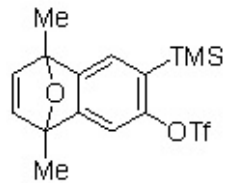

2m

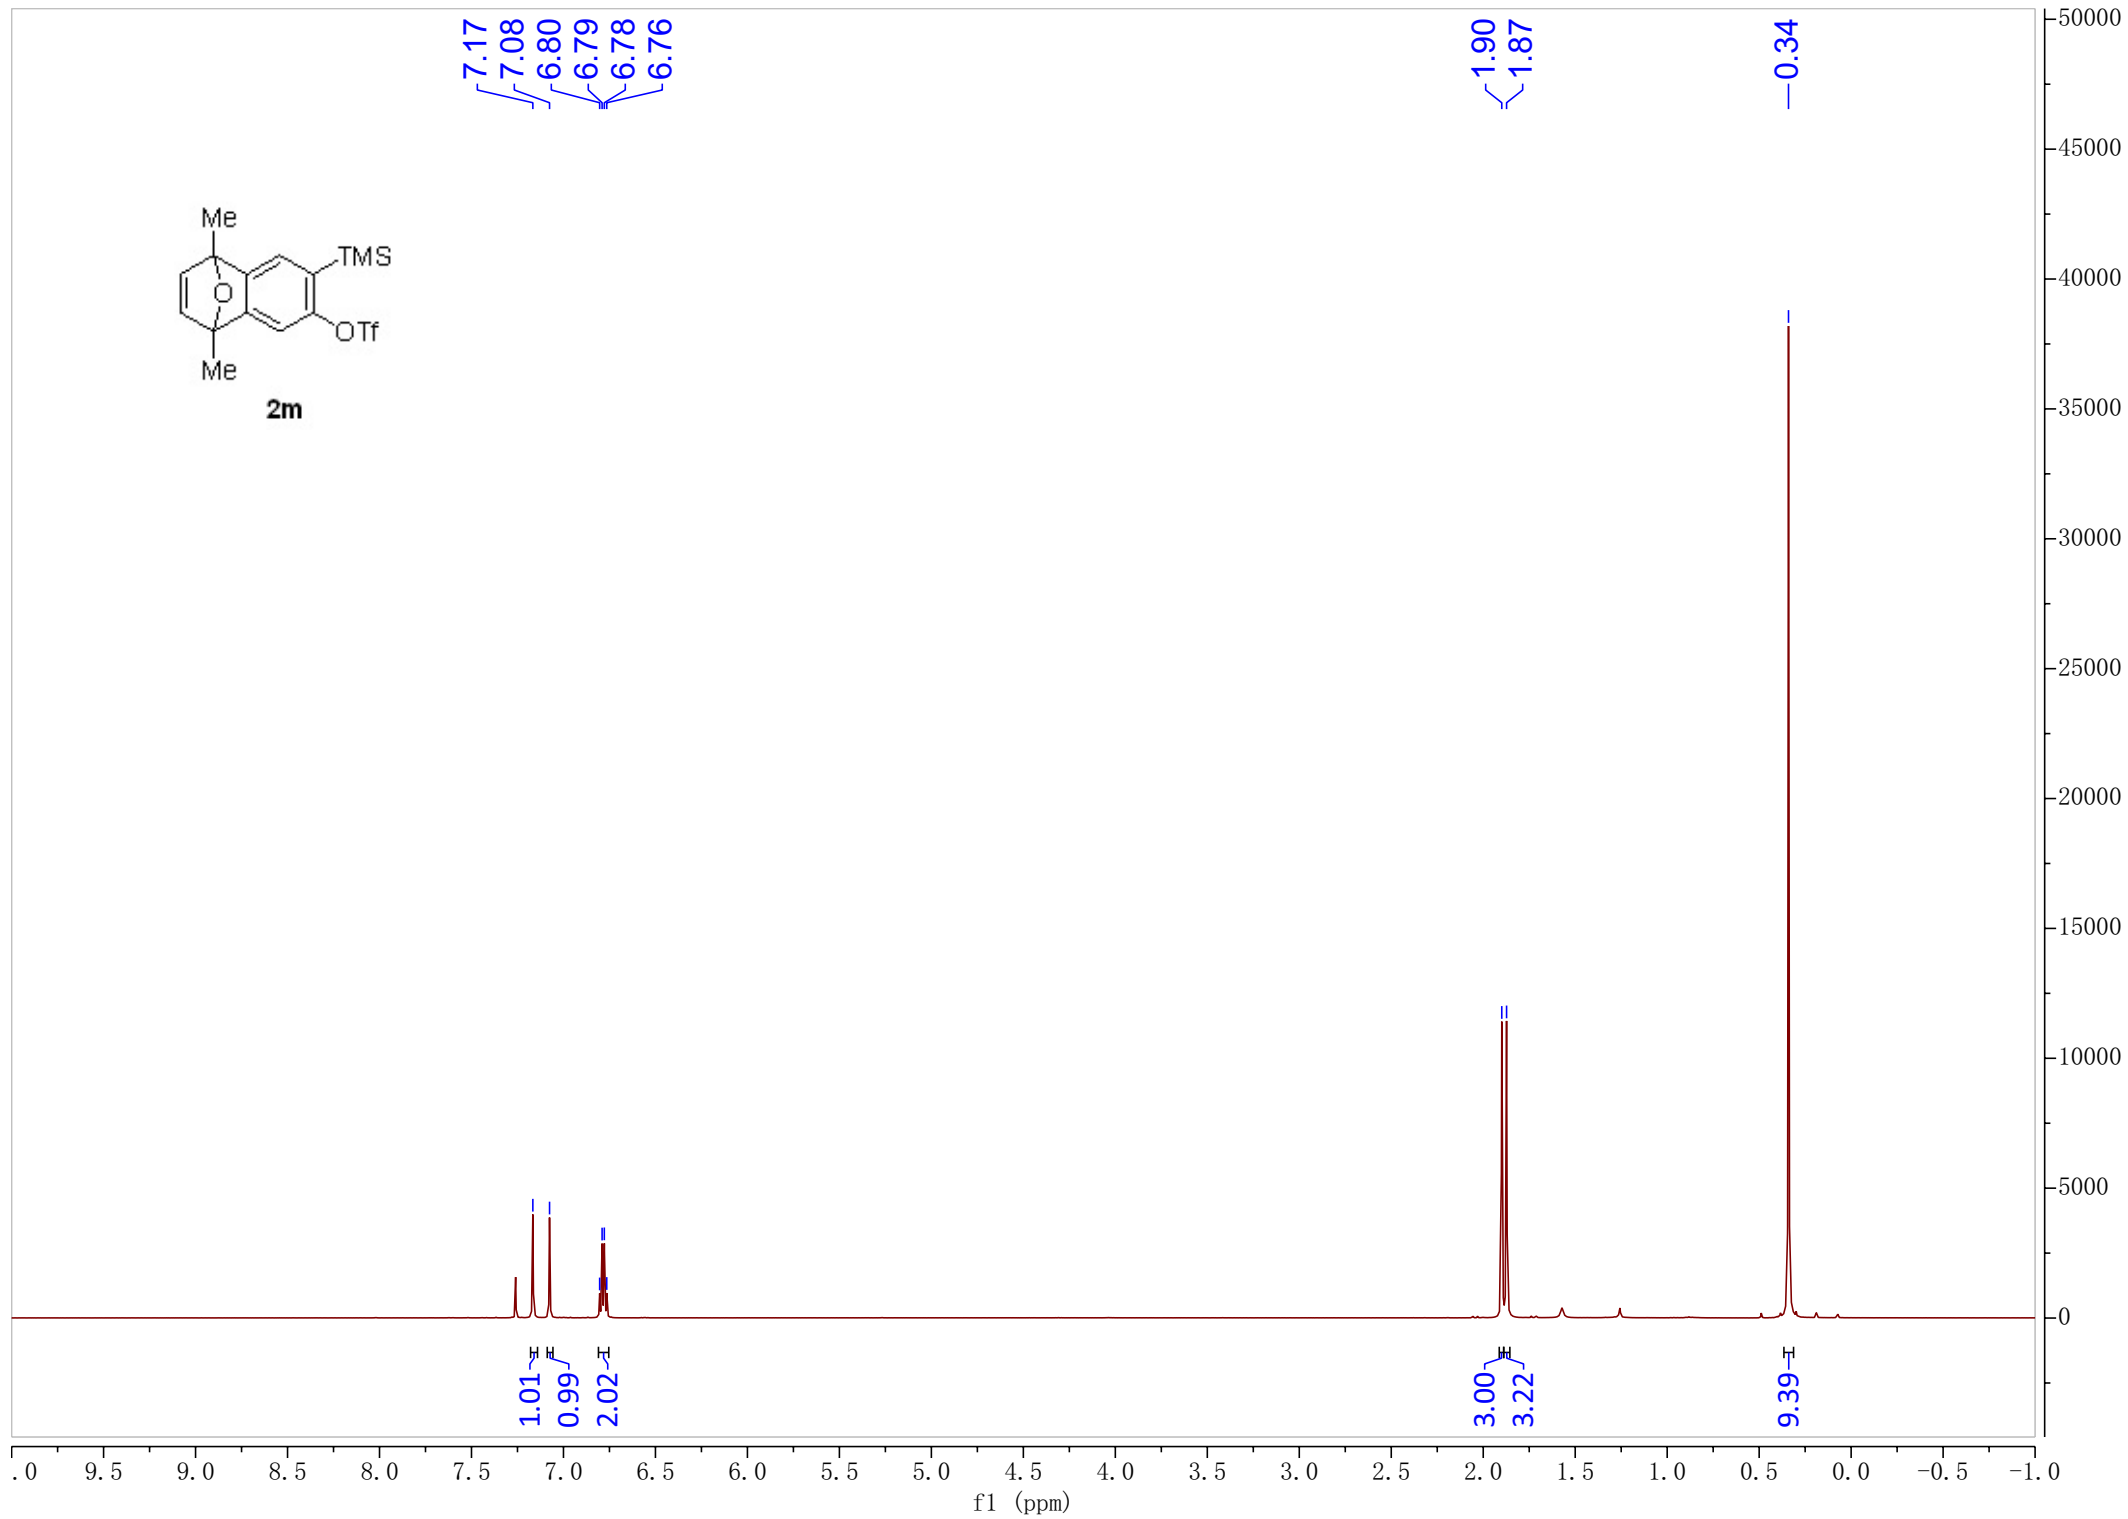

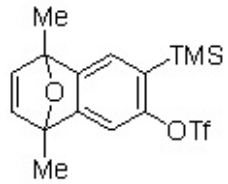

**2m**

157.53  
152.43  
151.64  
146.90  
146.34

127.87  
124.11  
121.60  
119.48  
117.36  
115.24  
111.10

88.58  
88.50

15.11  
15.02

-0.75

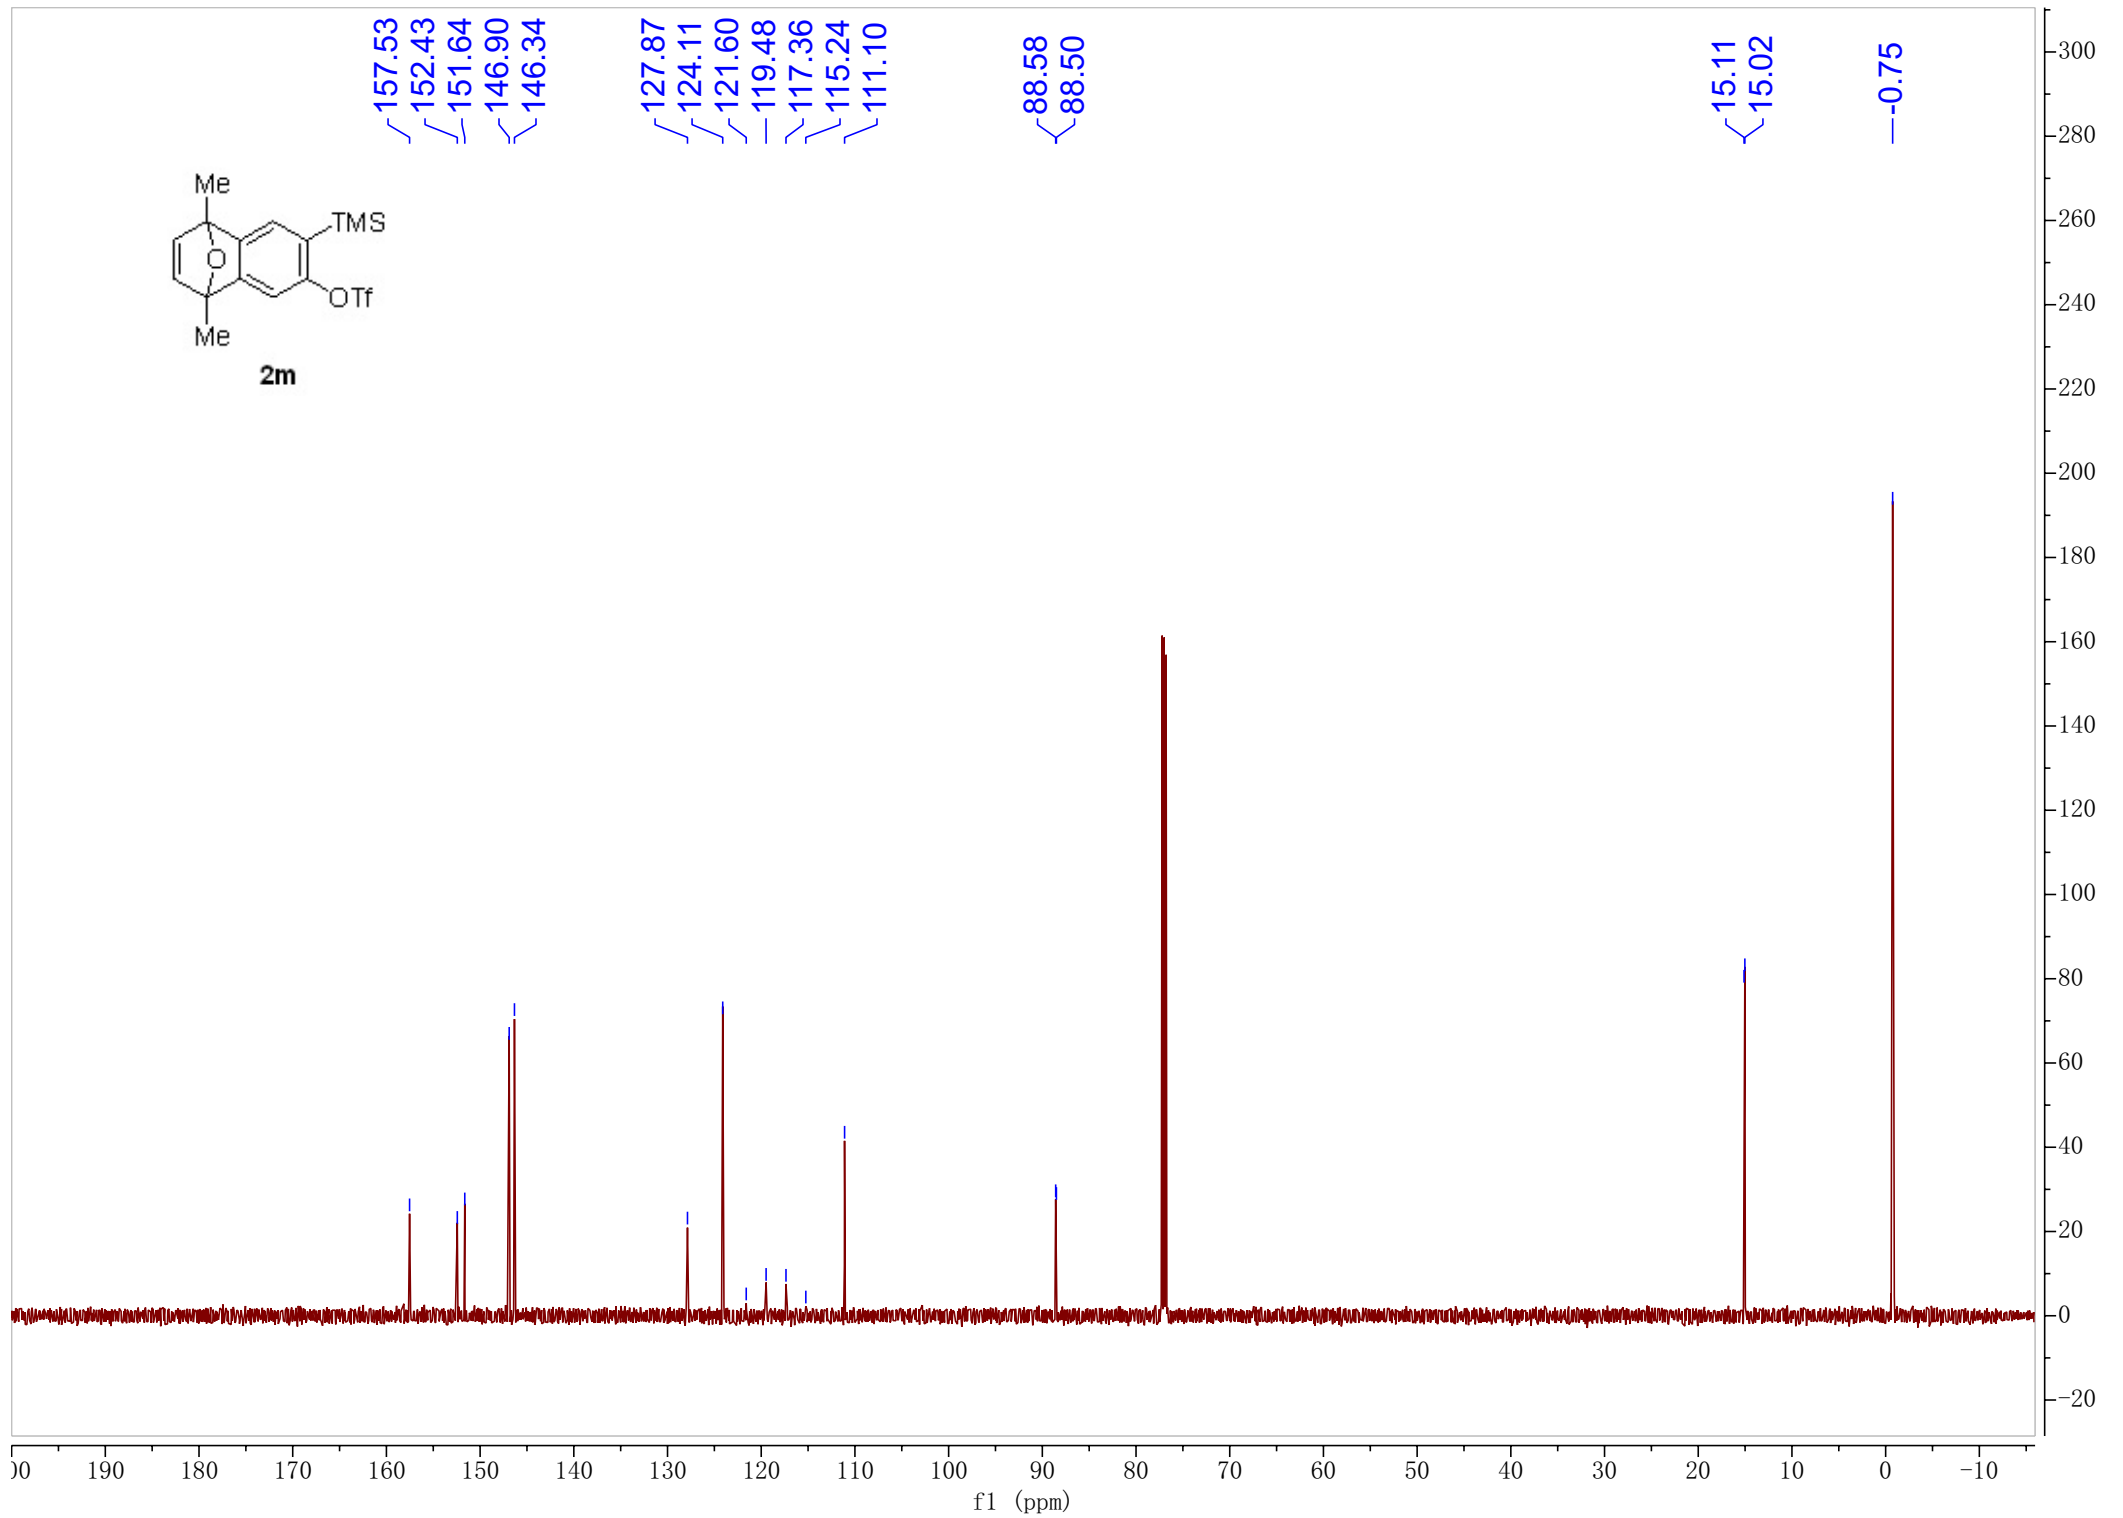

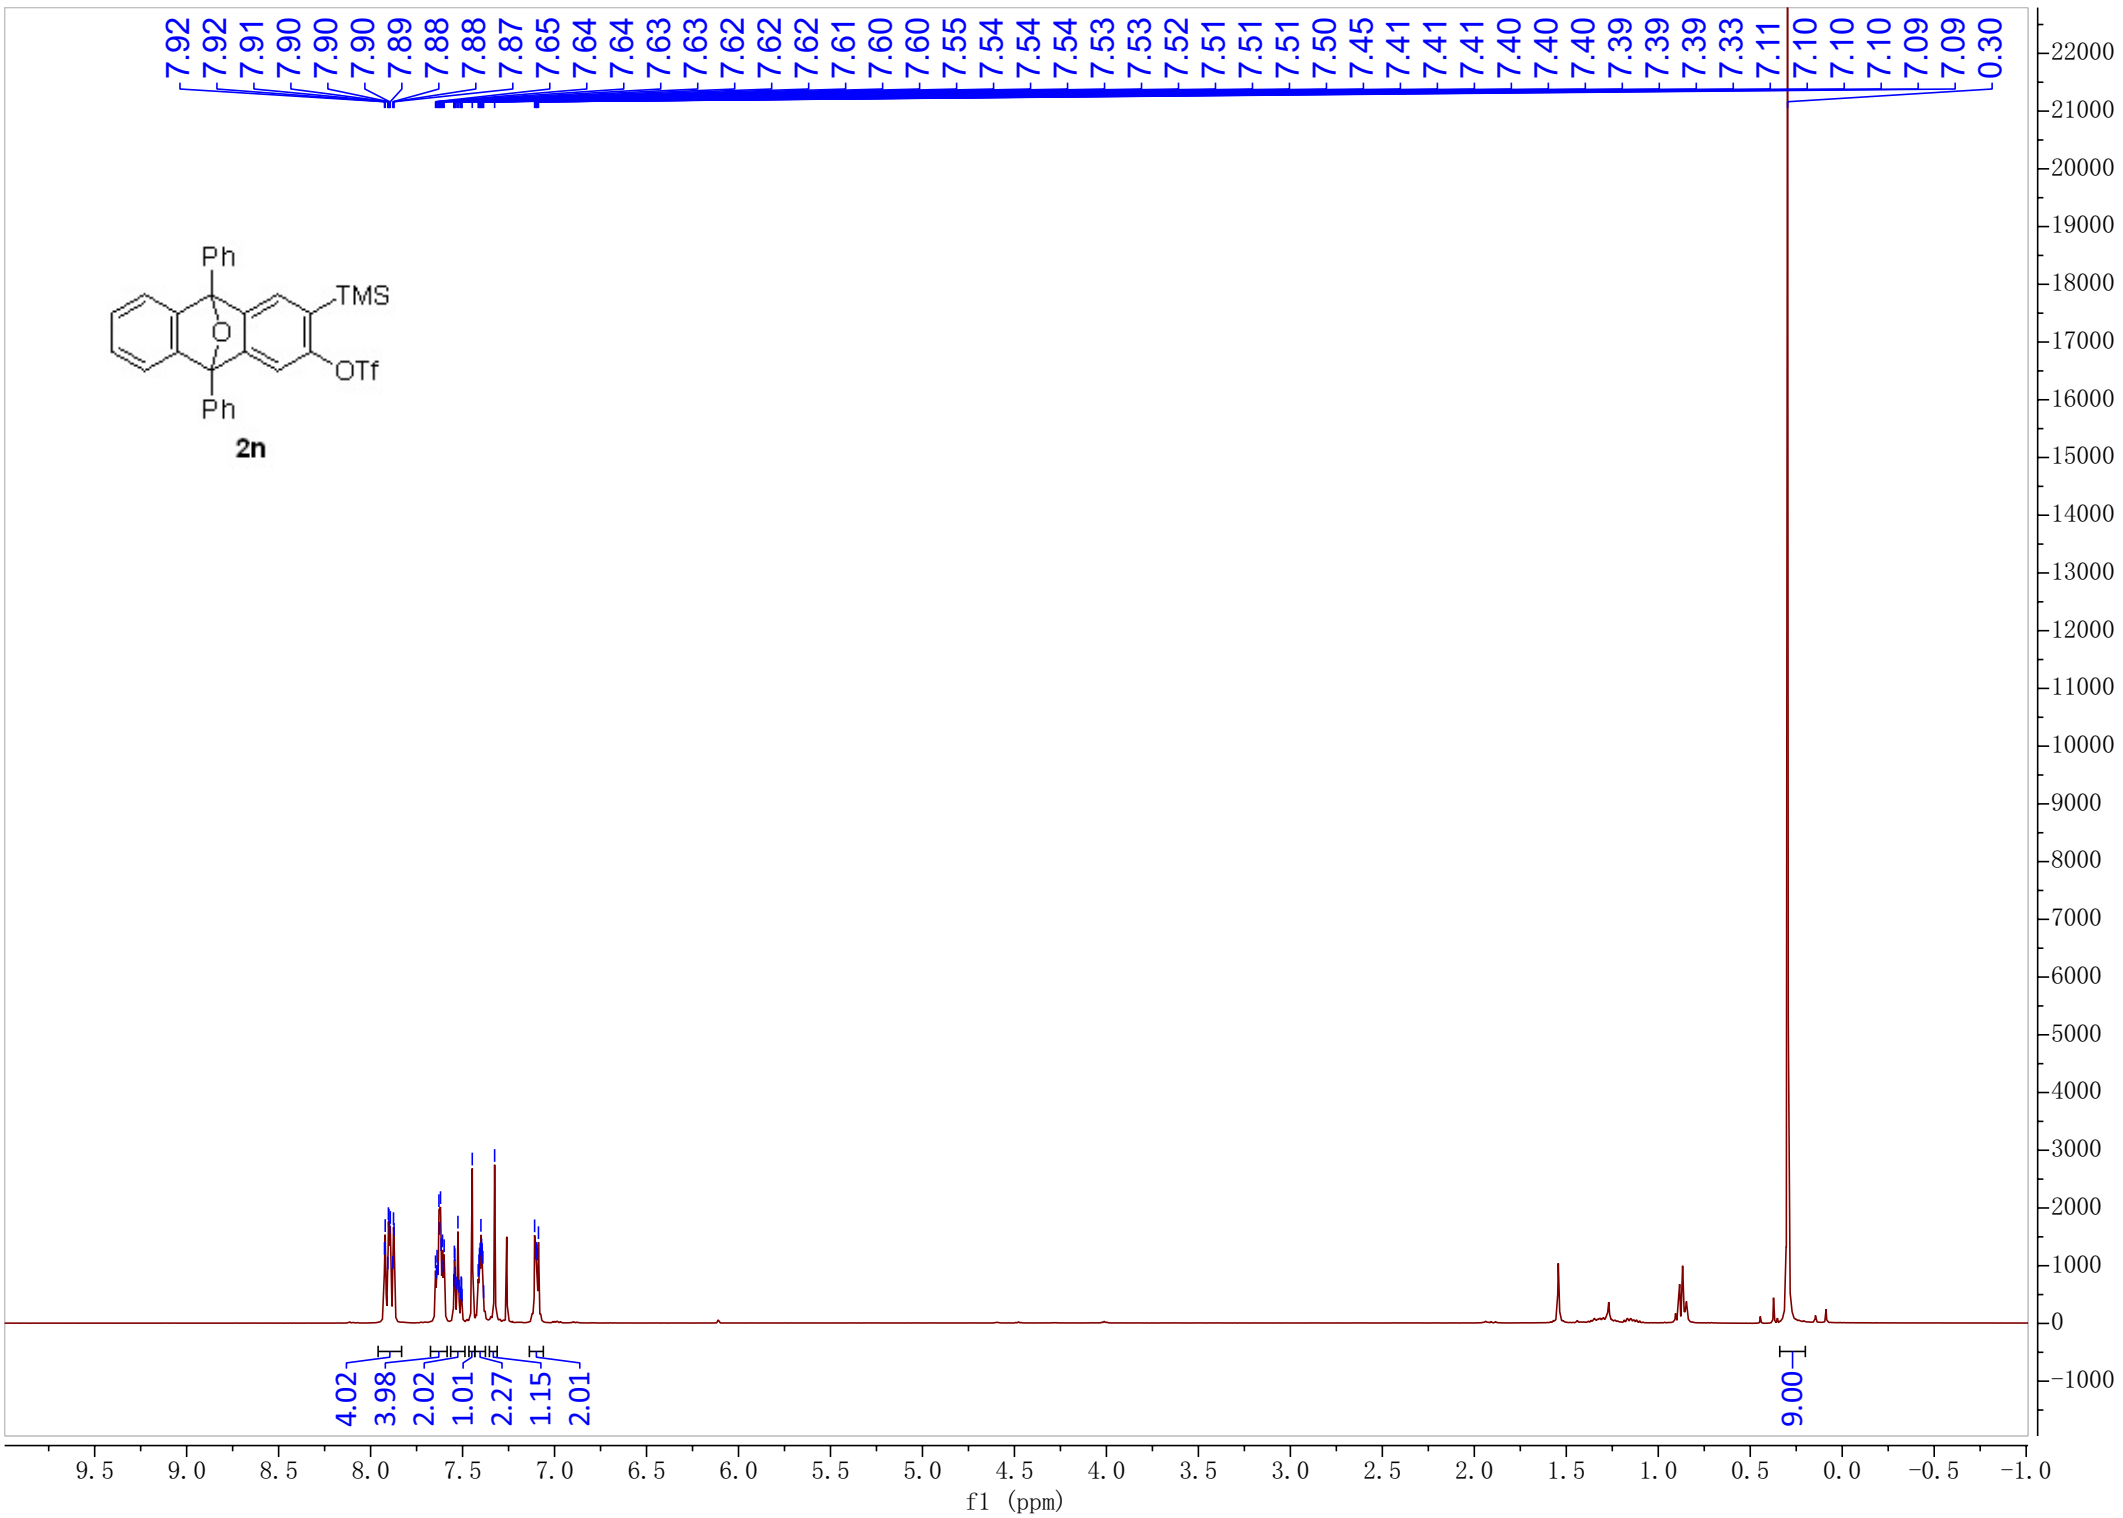



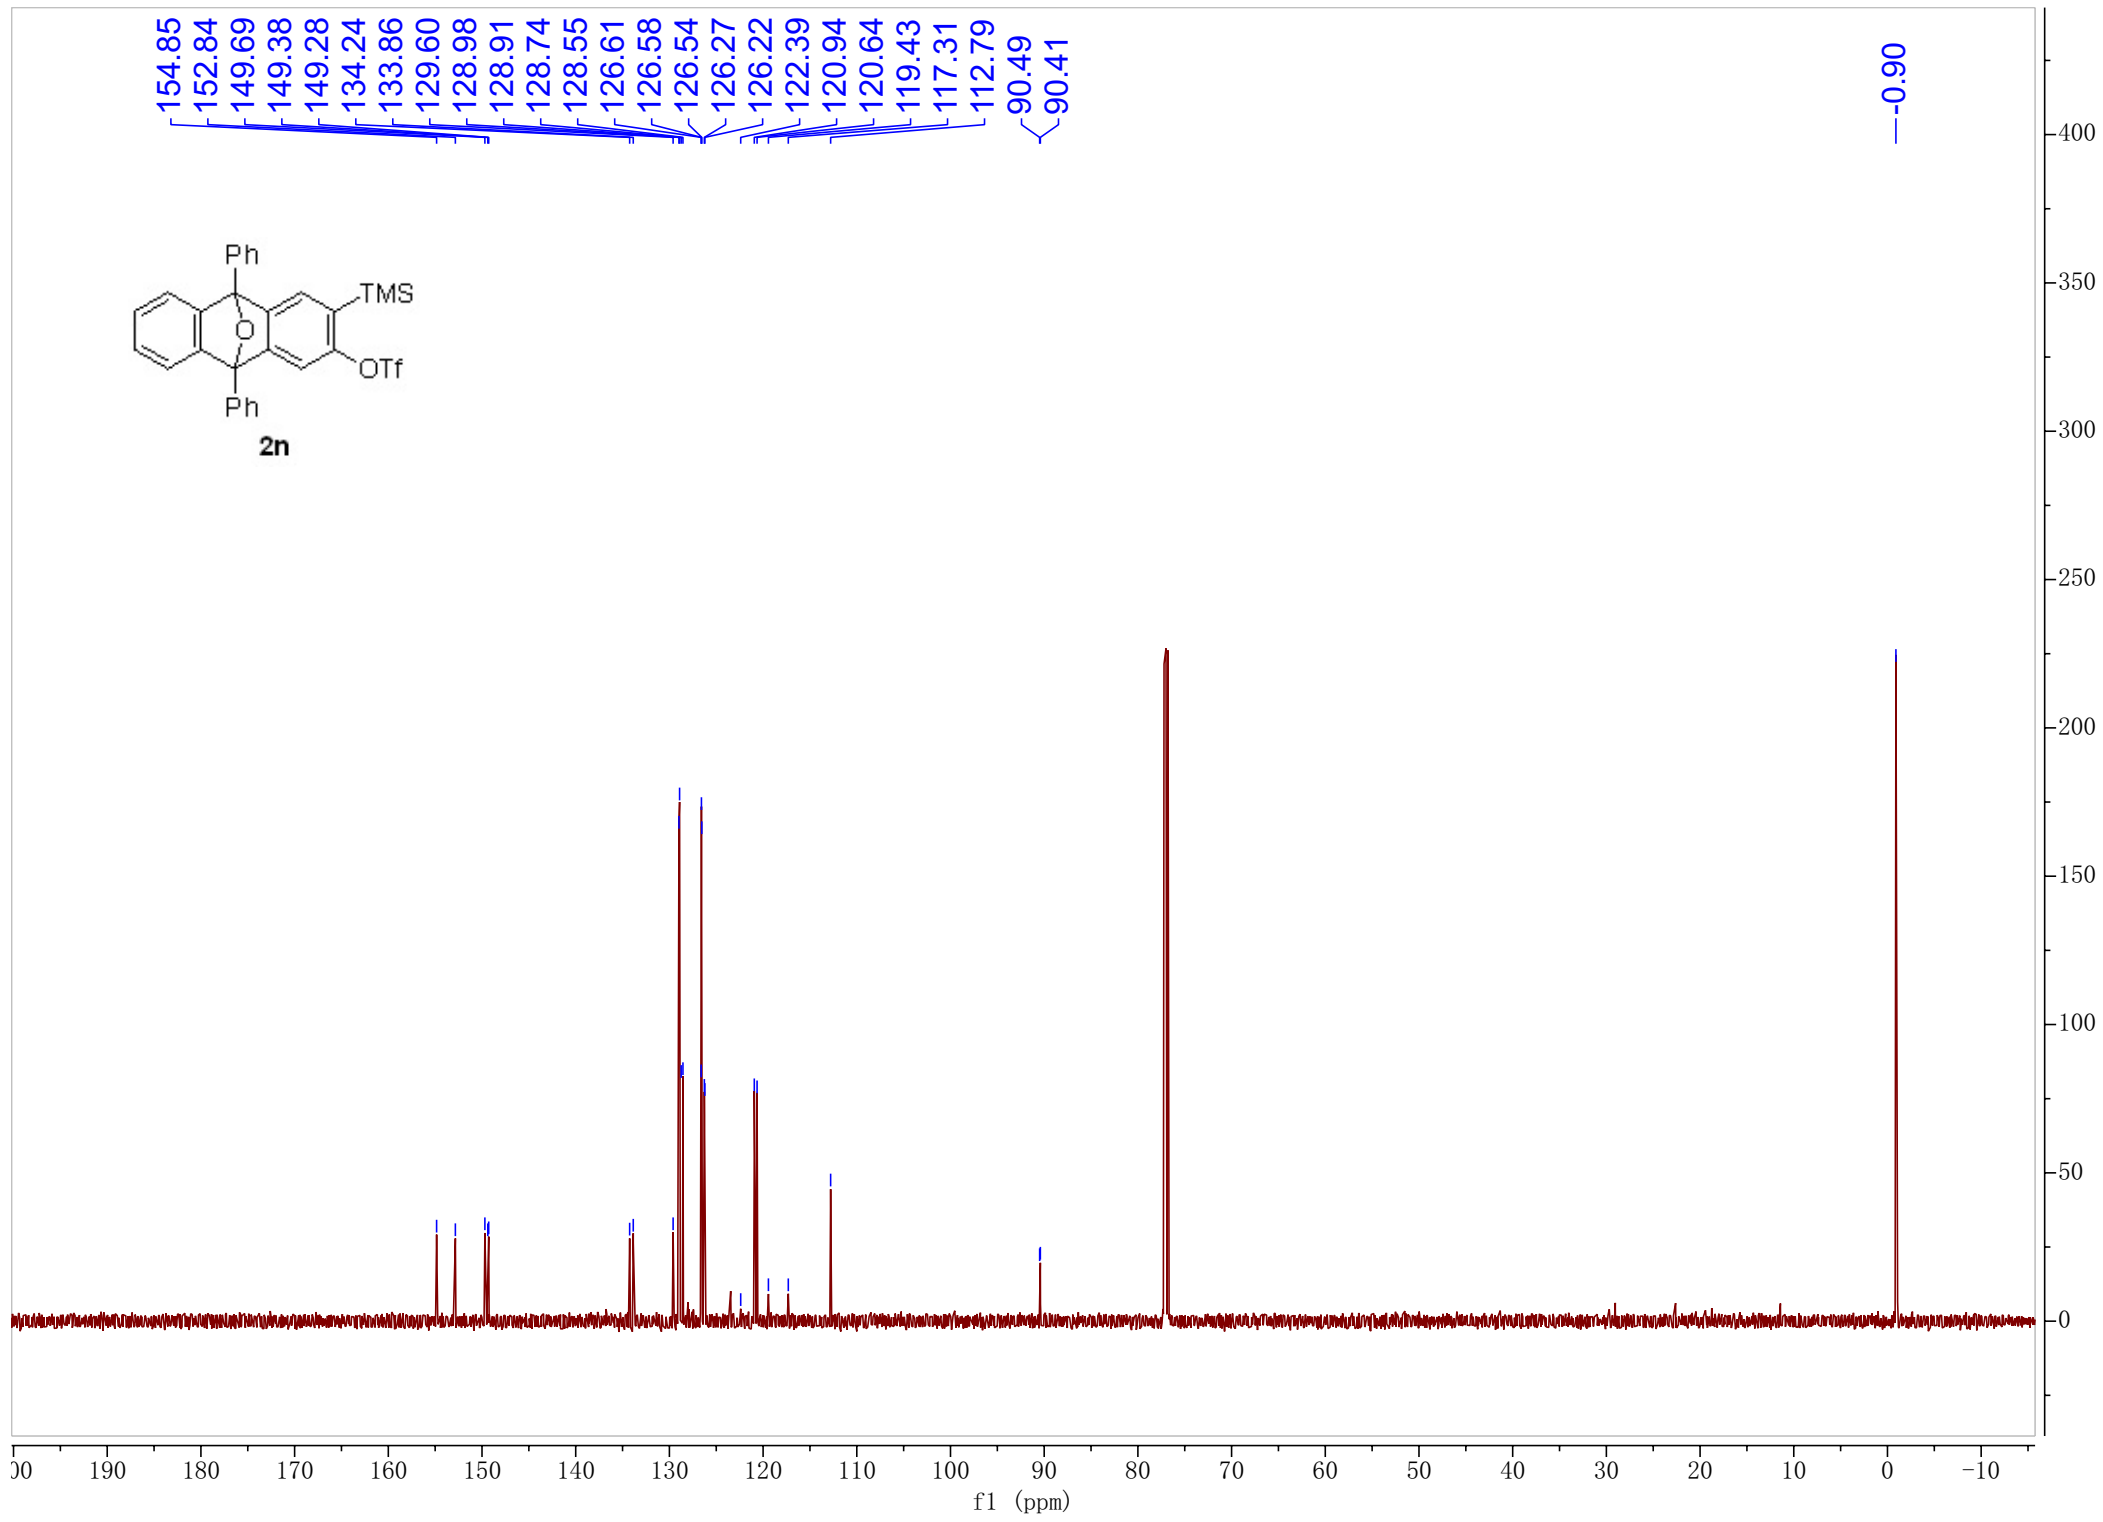

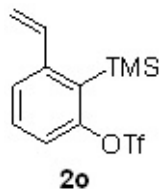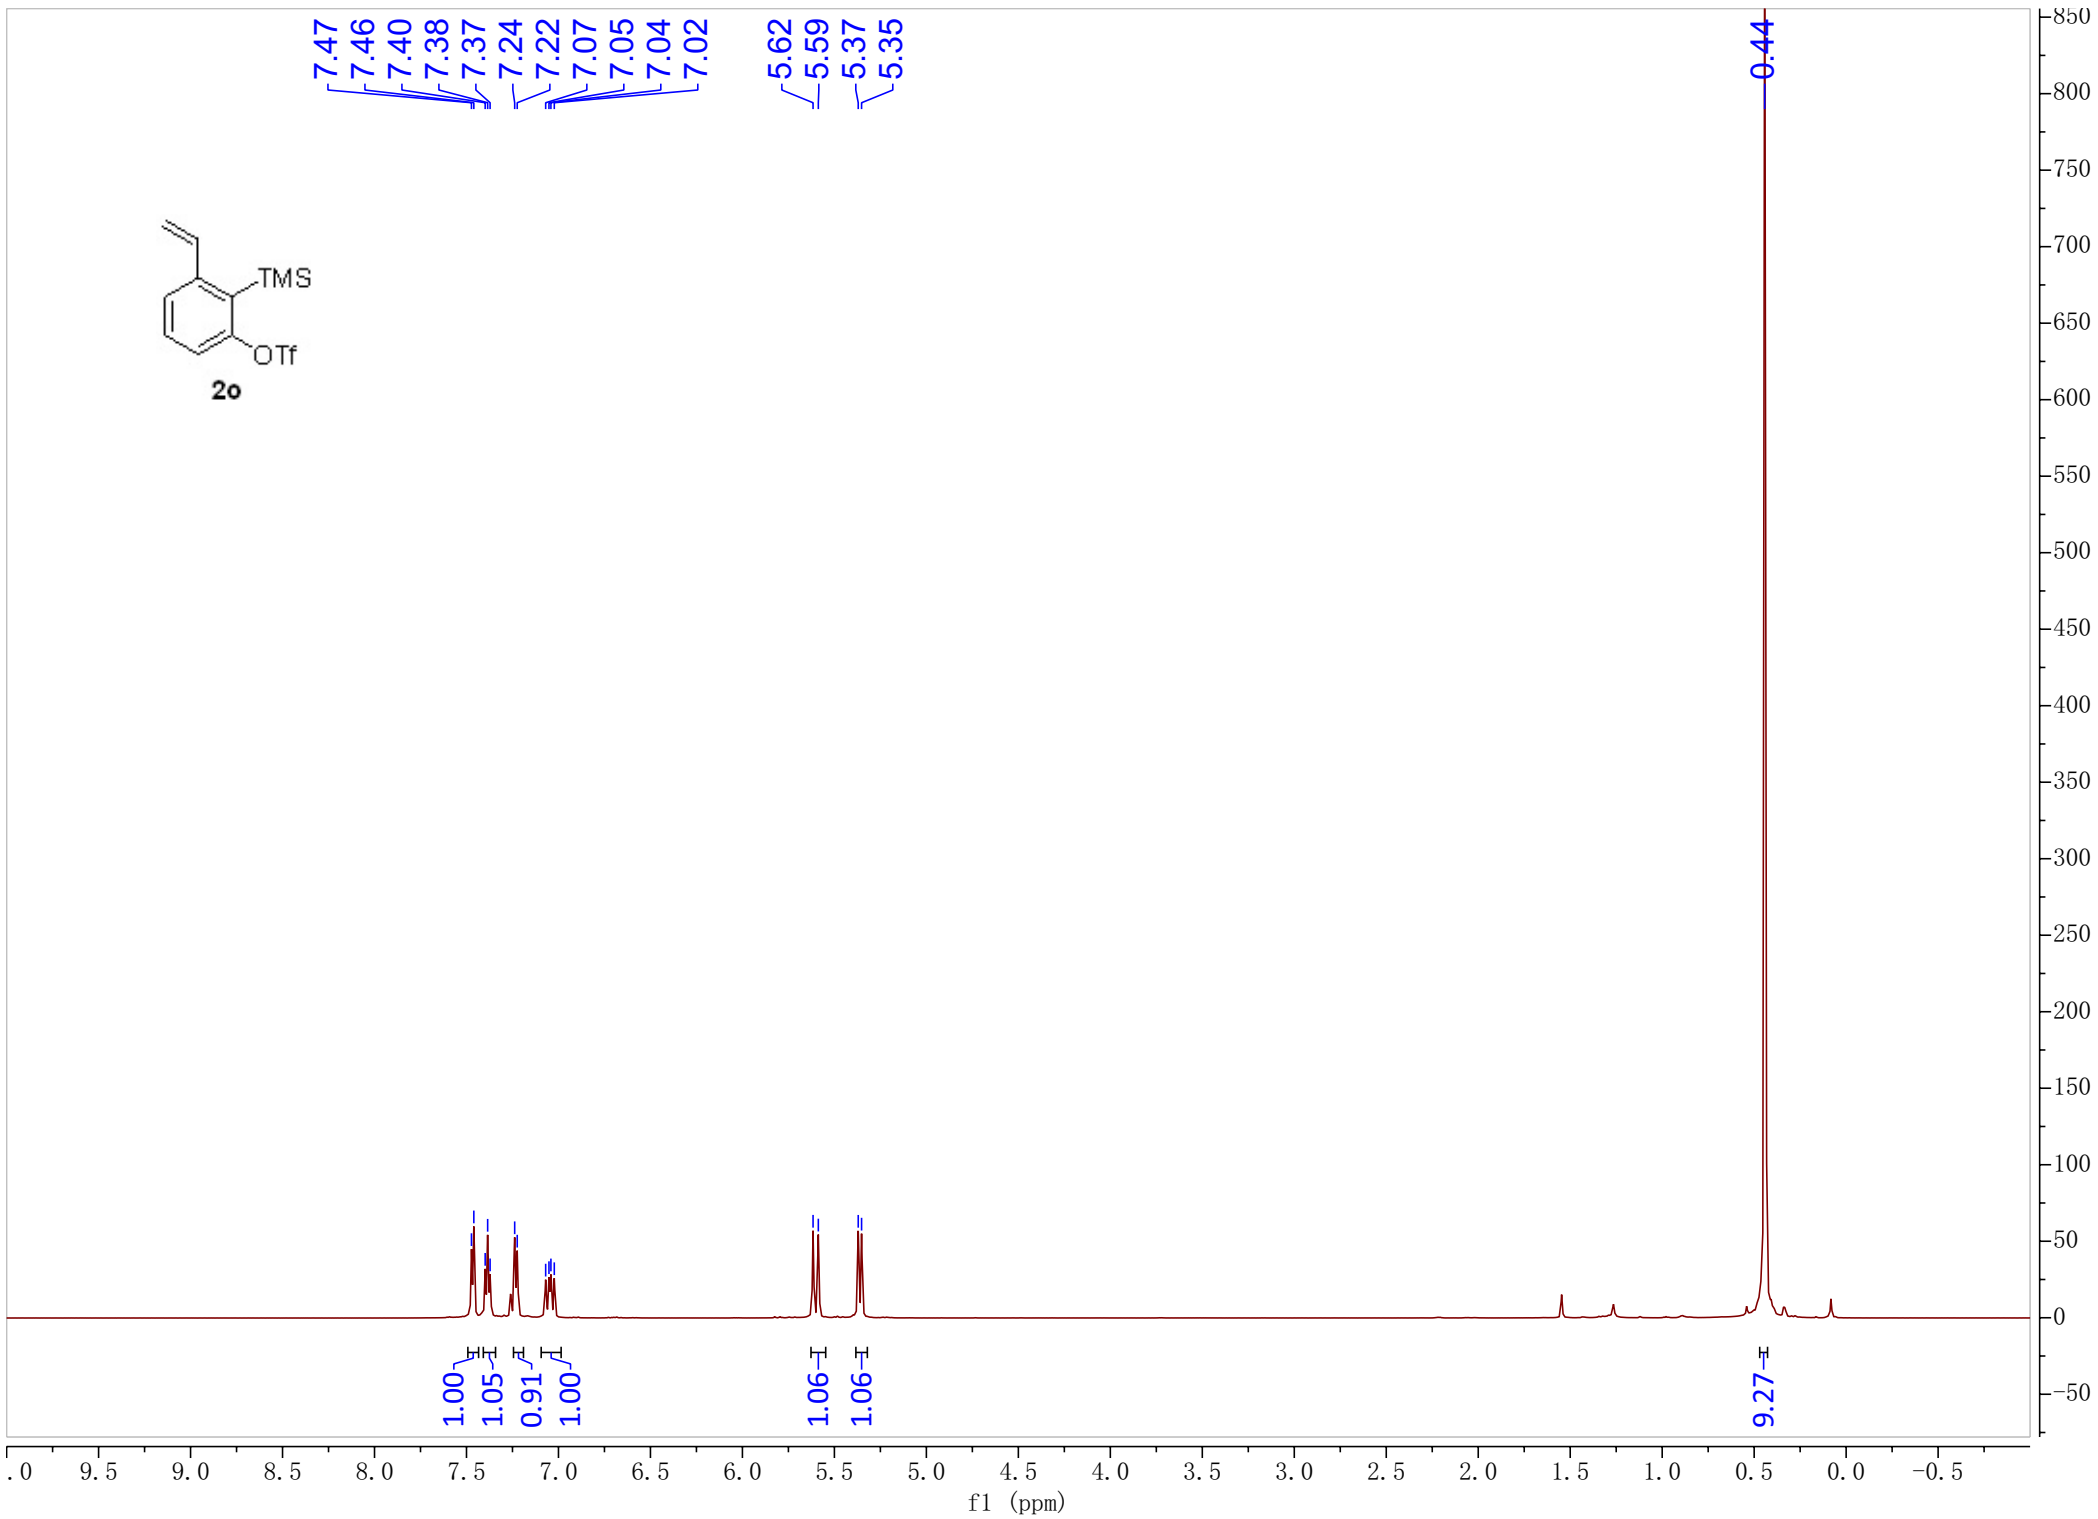

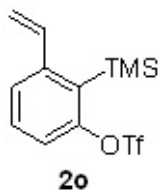

154.95  
147.45  
138.03  
130.71  
126.25  
123.35  
120.16  
119.13  
119.11  
117.21  
116.98  
113.79

1.94

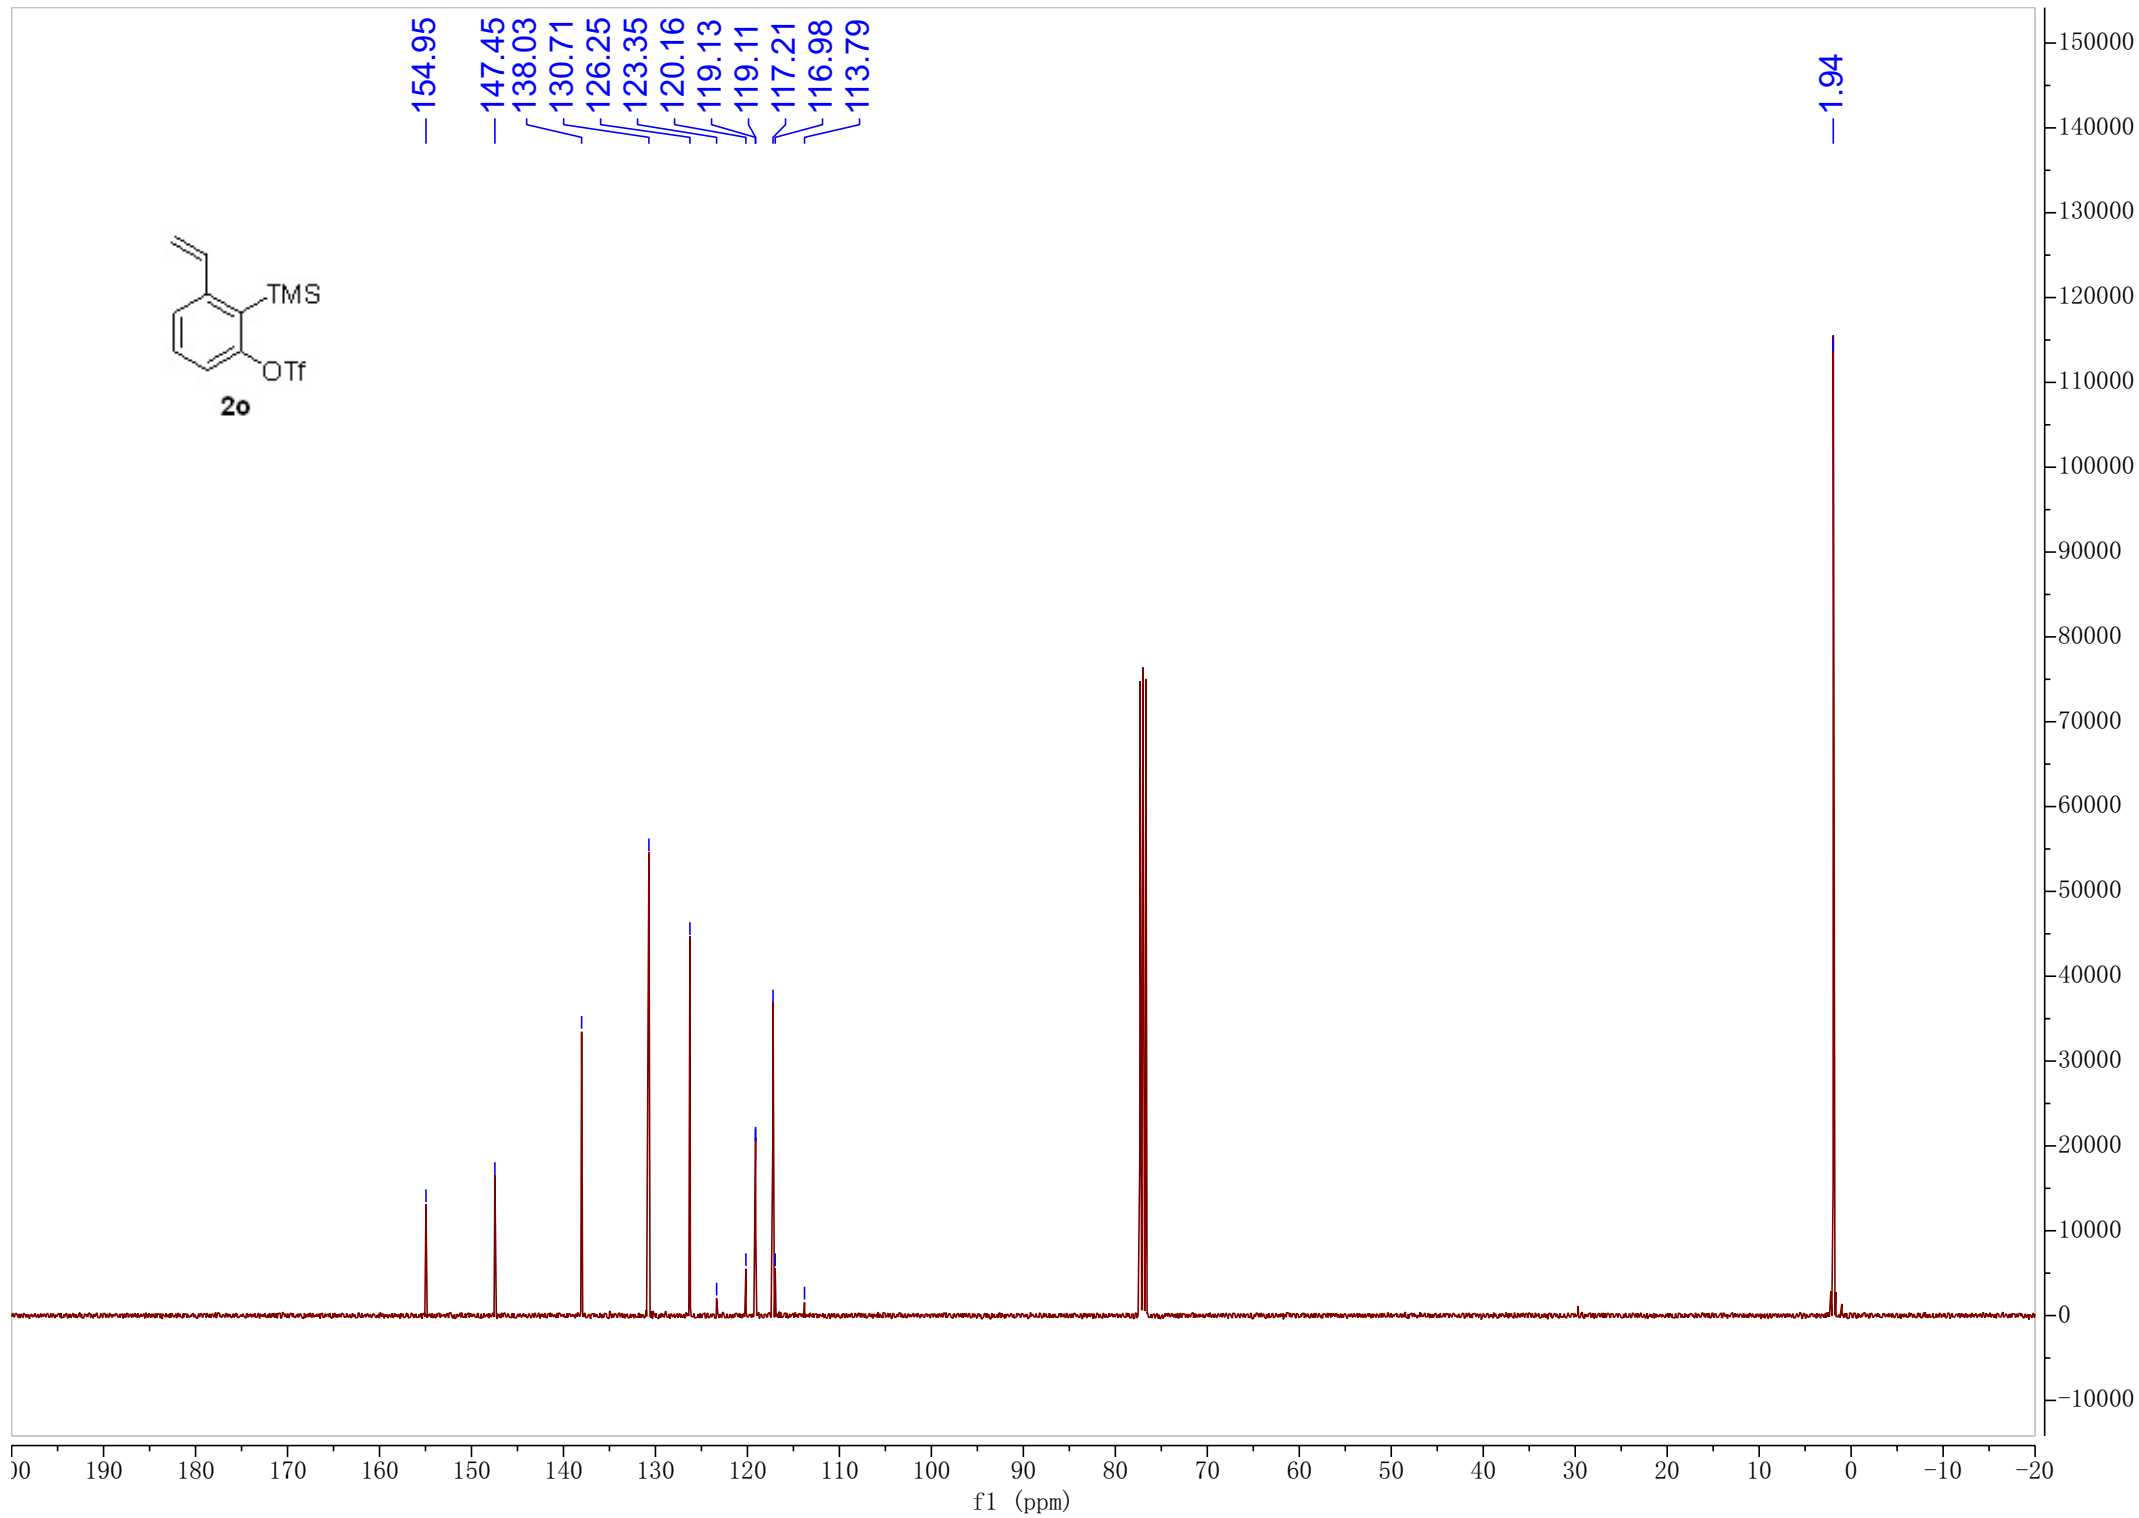



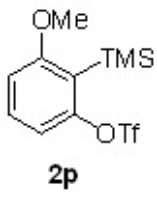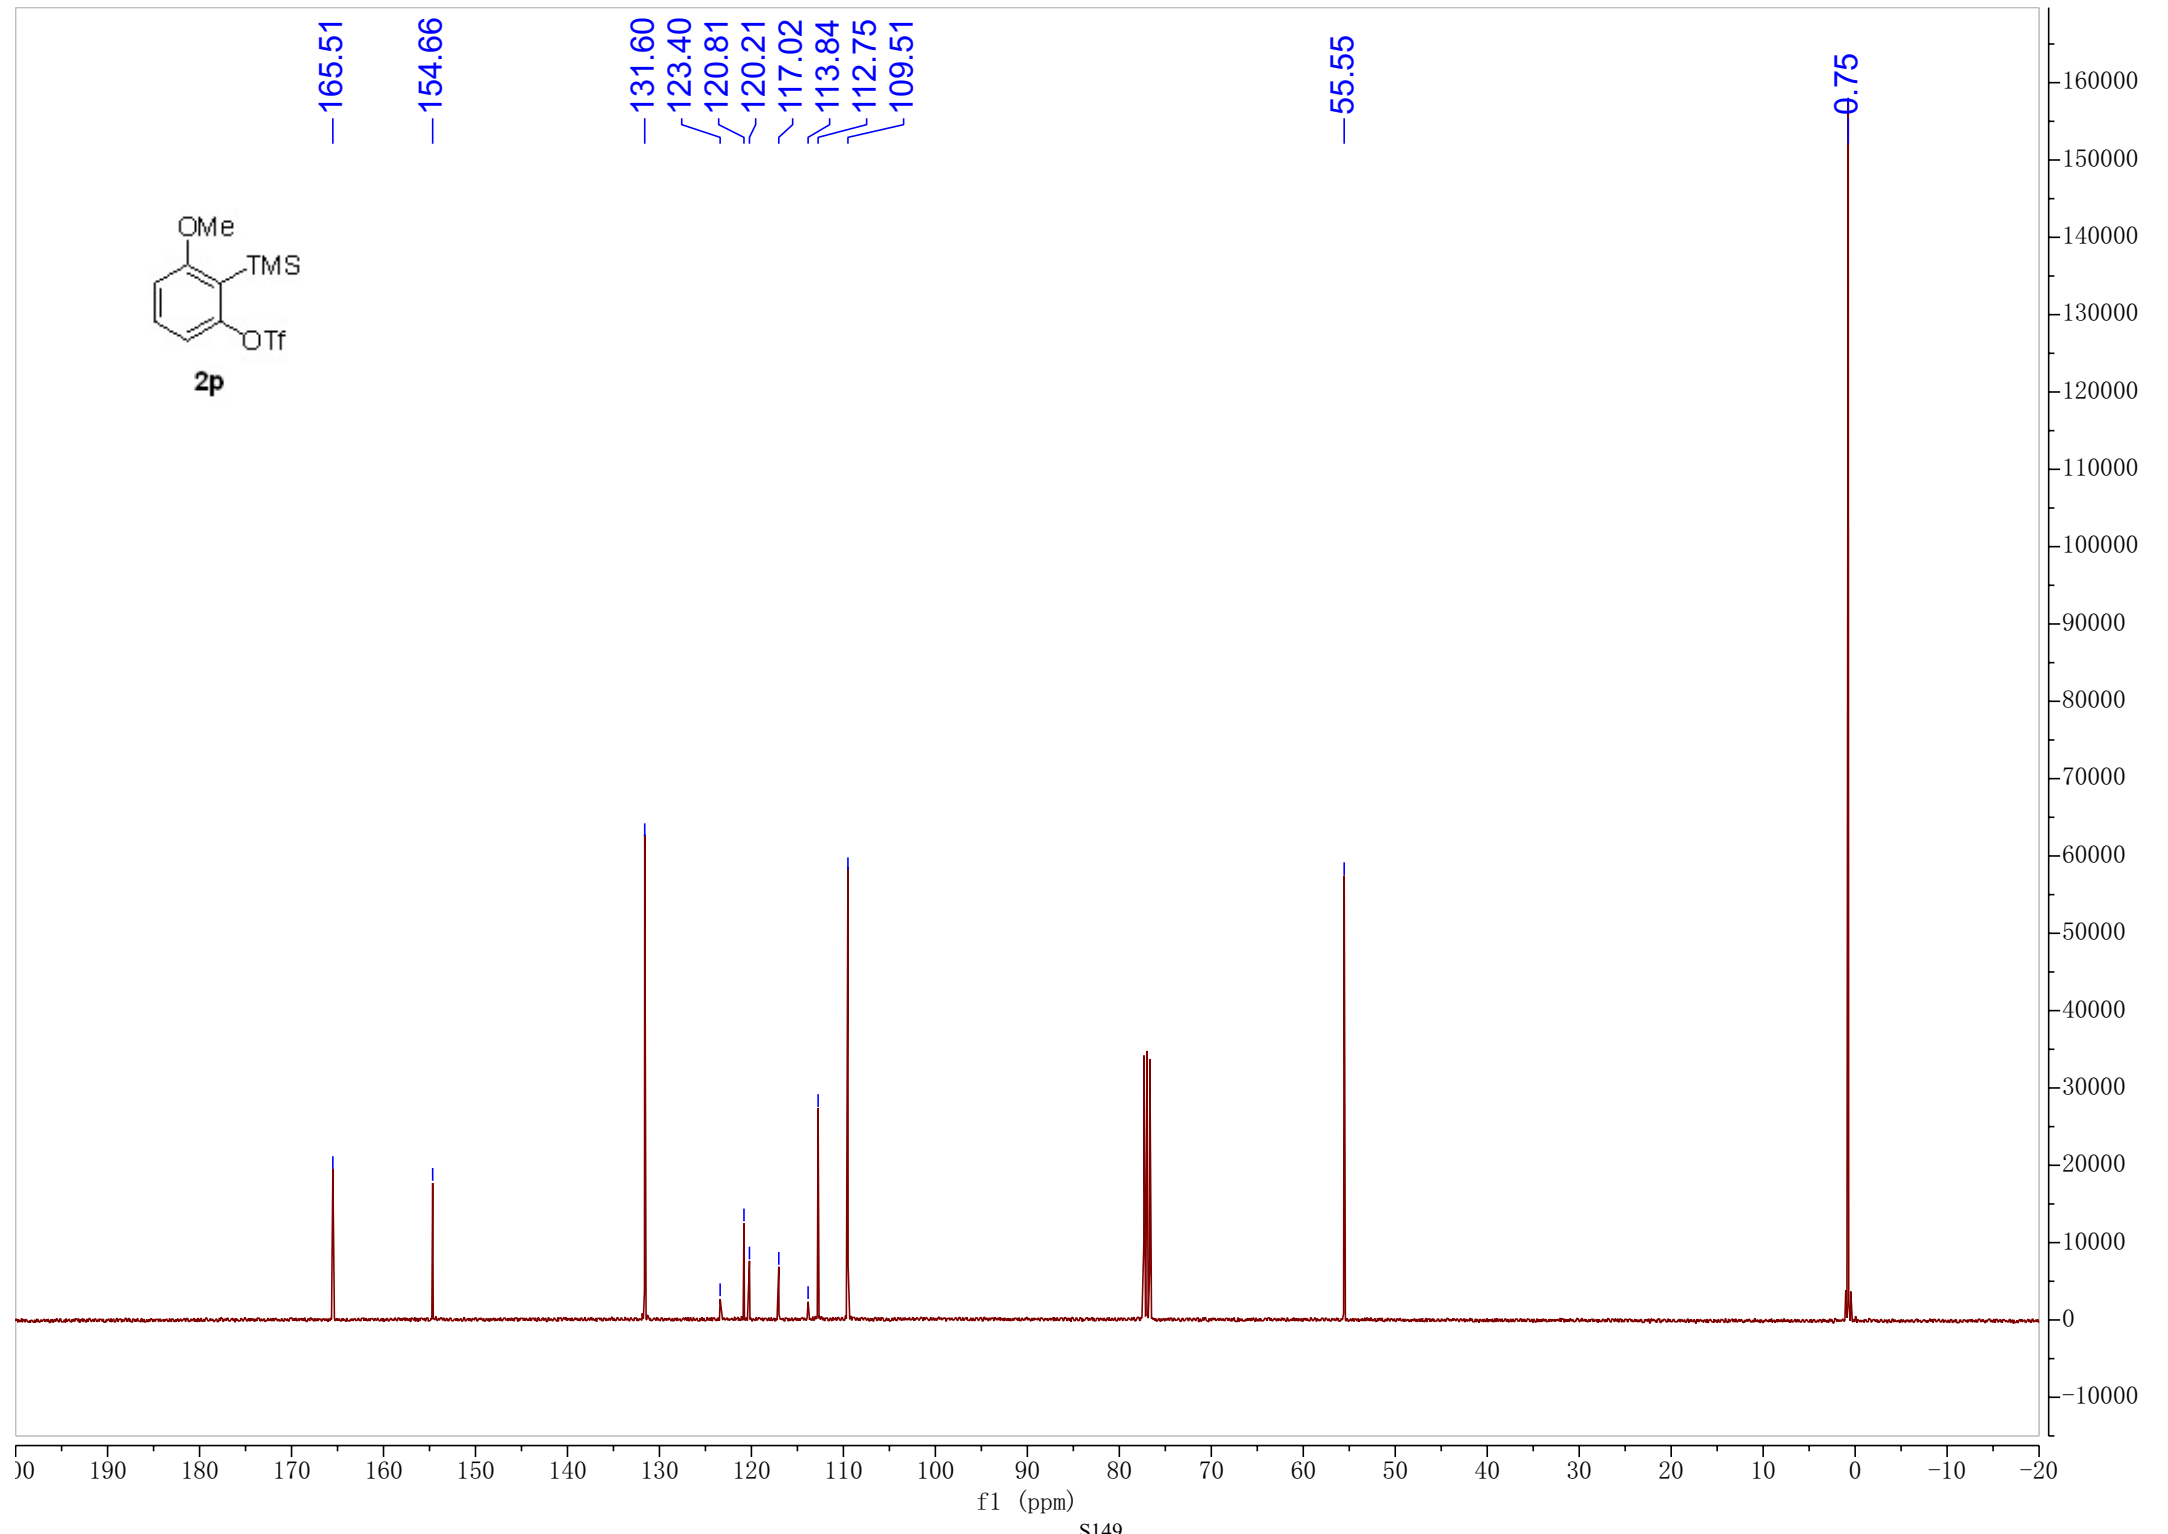

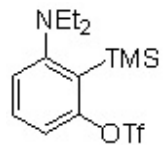

**2q**

7.35  
7.33  
7.31  
7.08  
7.06  
7.04  
7.02

3.05  
3.03  
3.02  
3.00

0.99  
0.98  
0.96  
-0.40

0.99  
1.13  
1.03

3.94

6.31

9.06

9.0 9.5 1.0  
f1 (ppm)

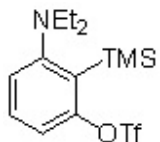

**2q**

—159.95  
—155.94

130.47  
130.00  
123.32  
122.28  
120.14  
116.96  
115.15  
113.77

—48.30

—11.10

—1.75

190 180 170 160 150 140 130 120 110 100 90 80 70 60 50 40 30 20 10 0 -10 -20

f1 (ppm)

S151

150000  
140000  
130000  
120000  
110000  
100000  
90000  
80000  
70000  
60000  
50000  
40000  
30000  
20000  
10000  
0  
-10000

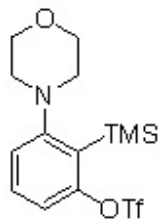

2r

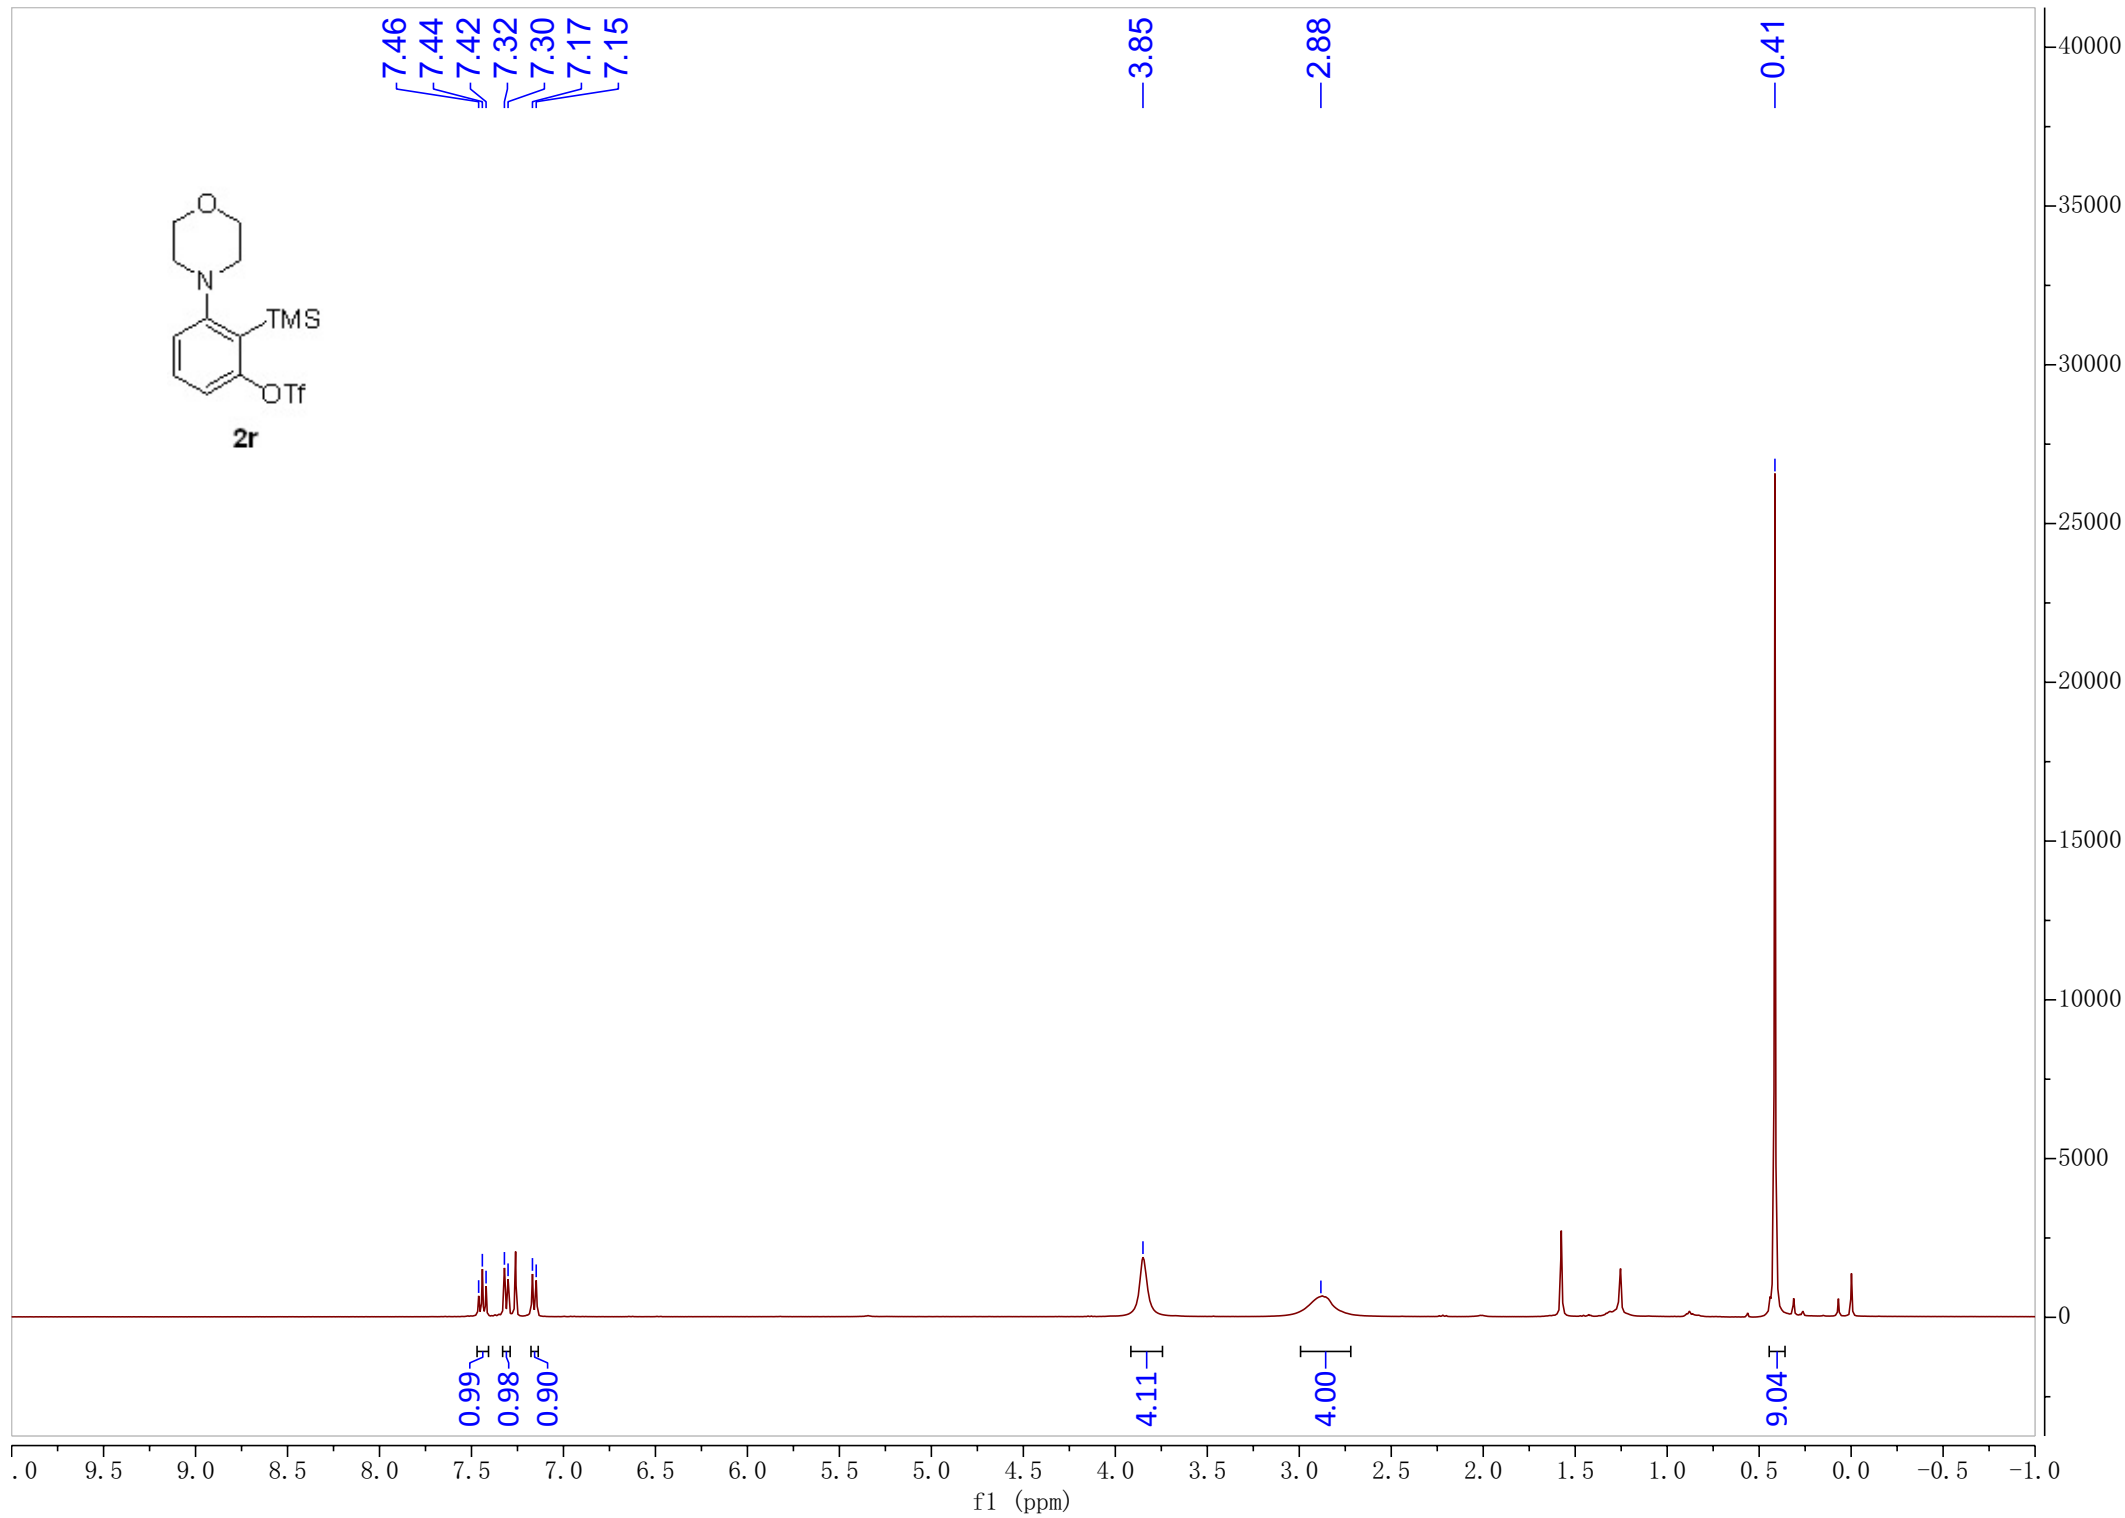



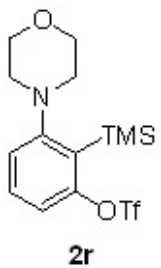

— 161.79

— 154.76

131.58

131.36

123.38

122.35

120.19

118.23

117.00

113.82

— 66.77

— 54.62

— 1.96

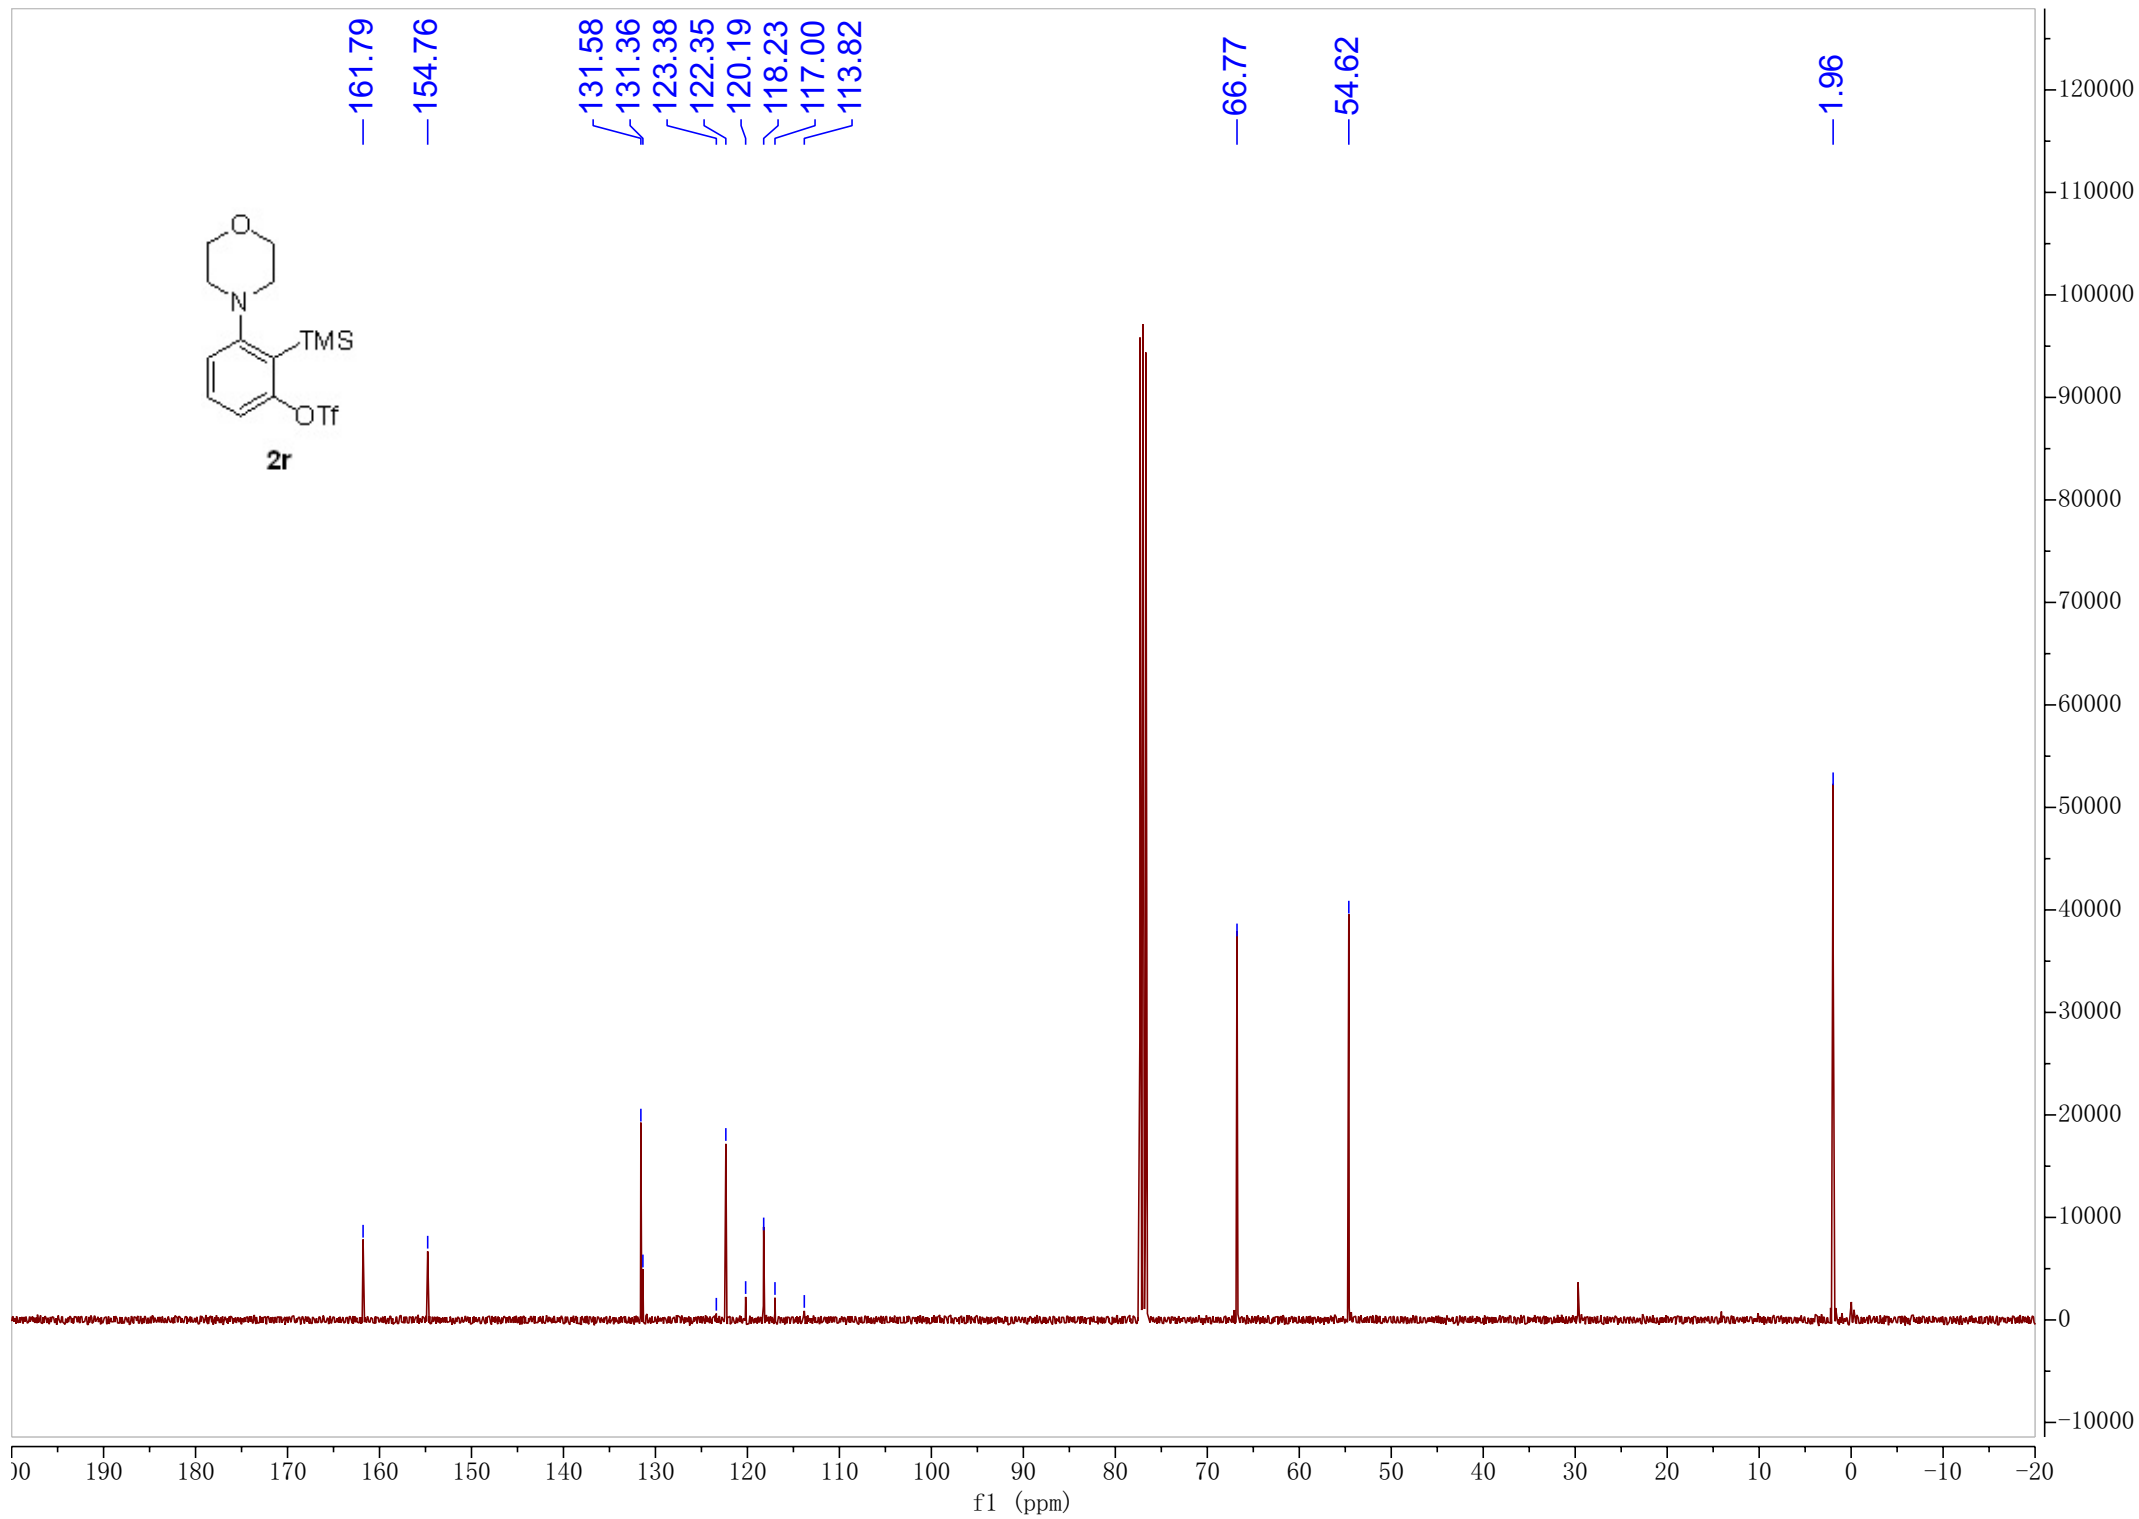

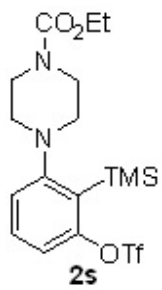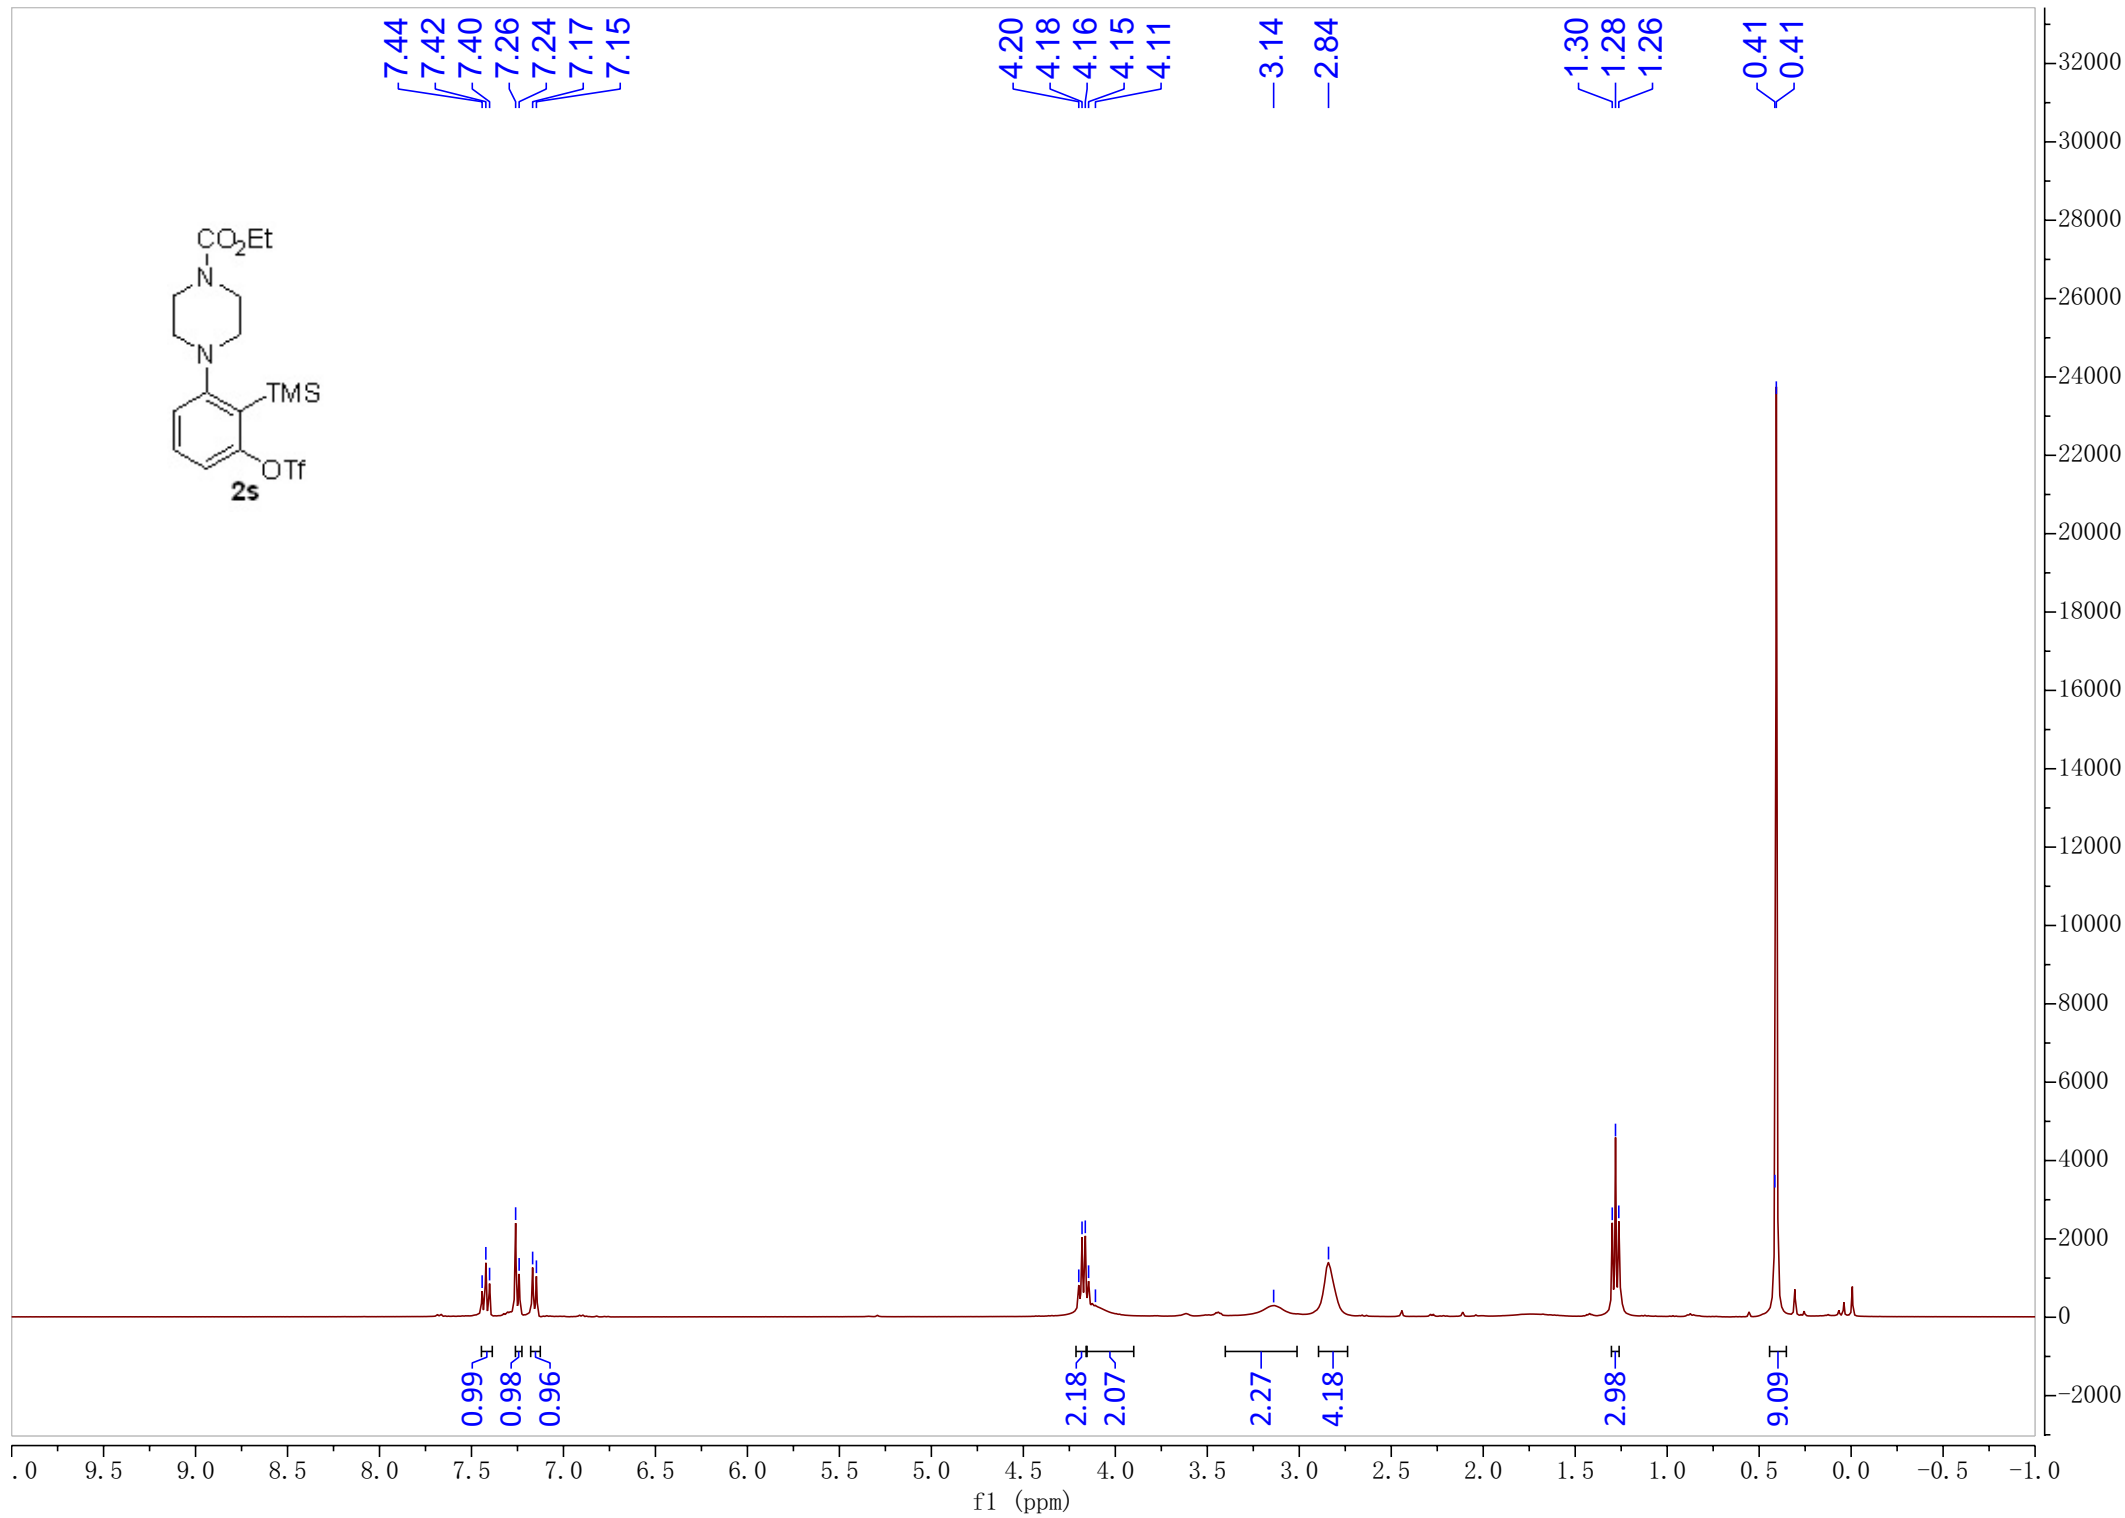

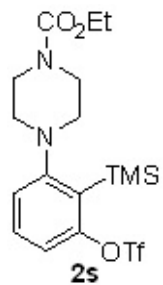

161.69  
155.61  
154.72  
131.56  
131.31  
123.36  
122.27  
120.17  
118.39  
118.37  
116.99  
113.80

61.52  
54.12  
43.50  
14.65  
1.96

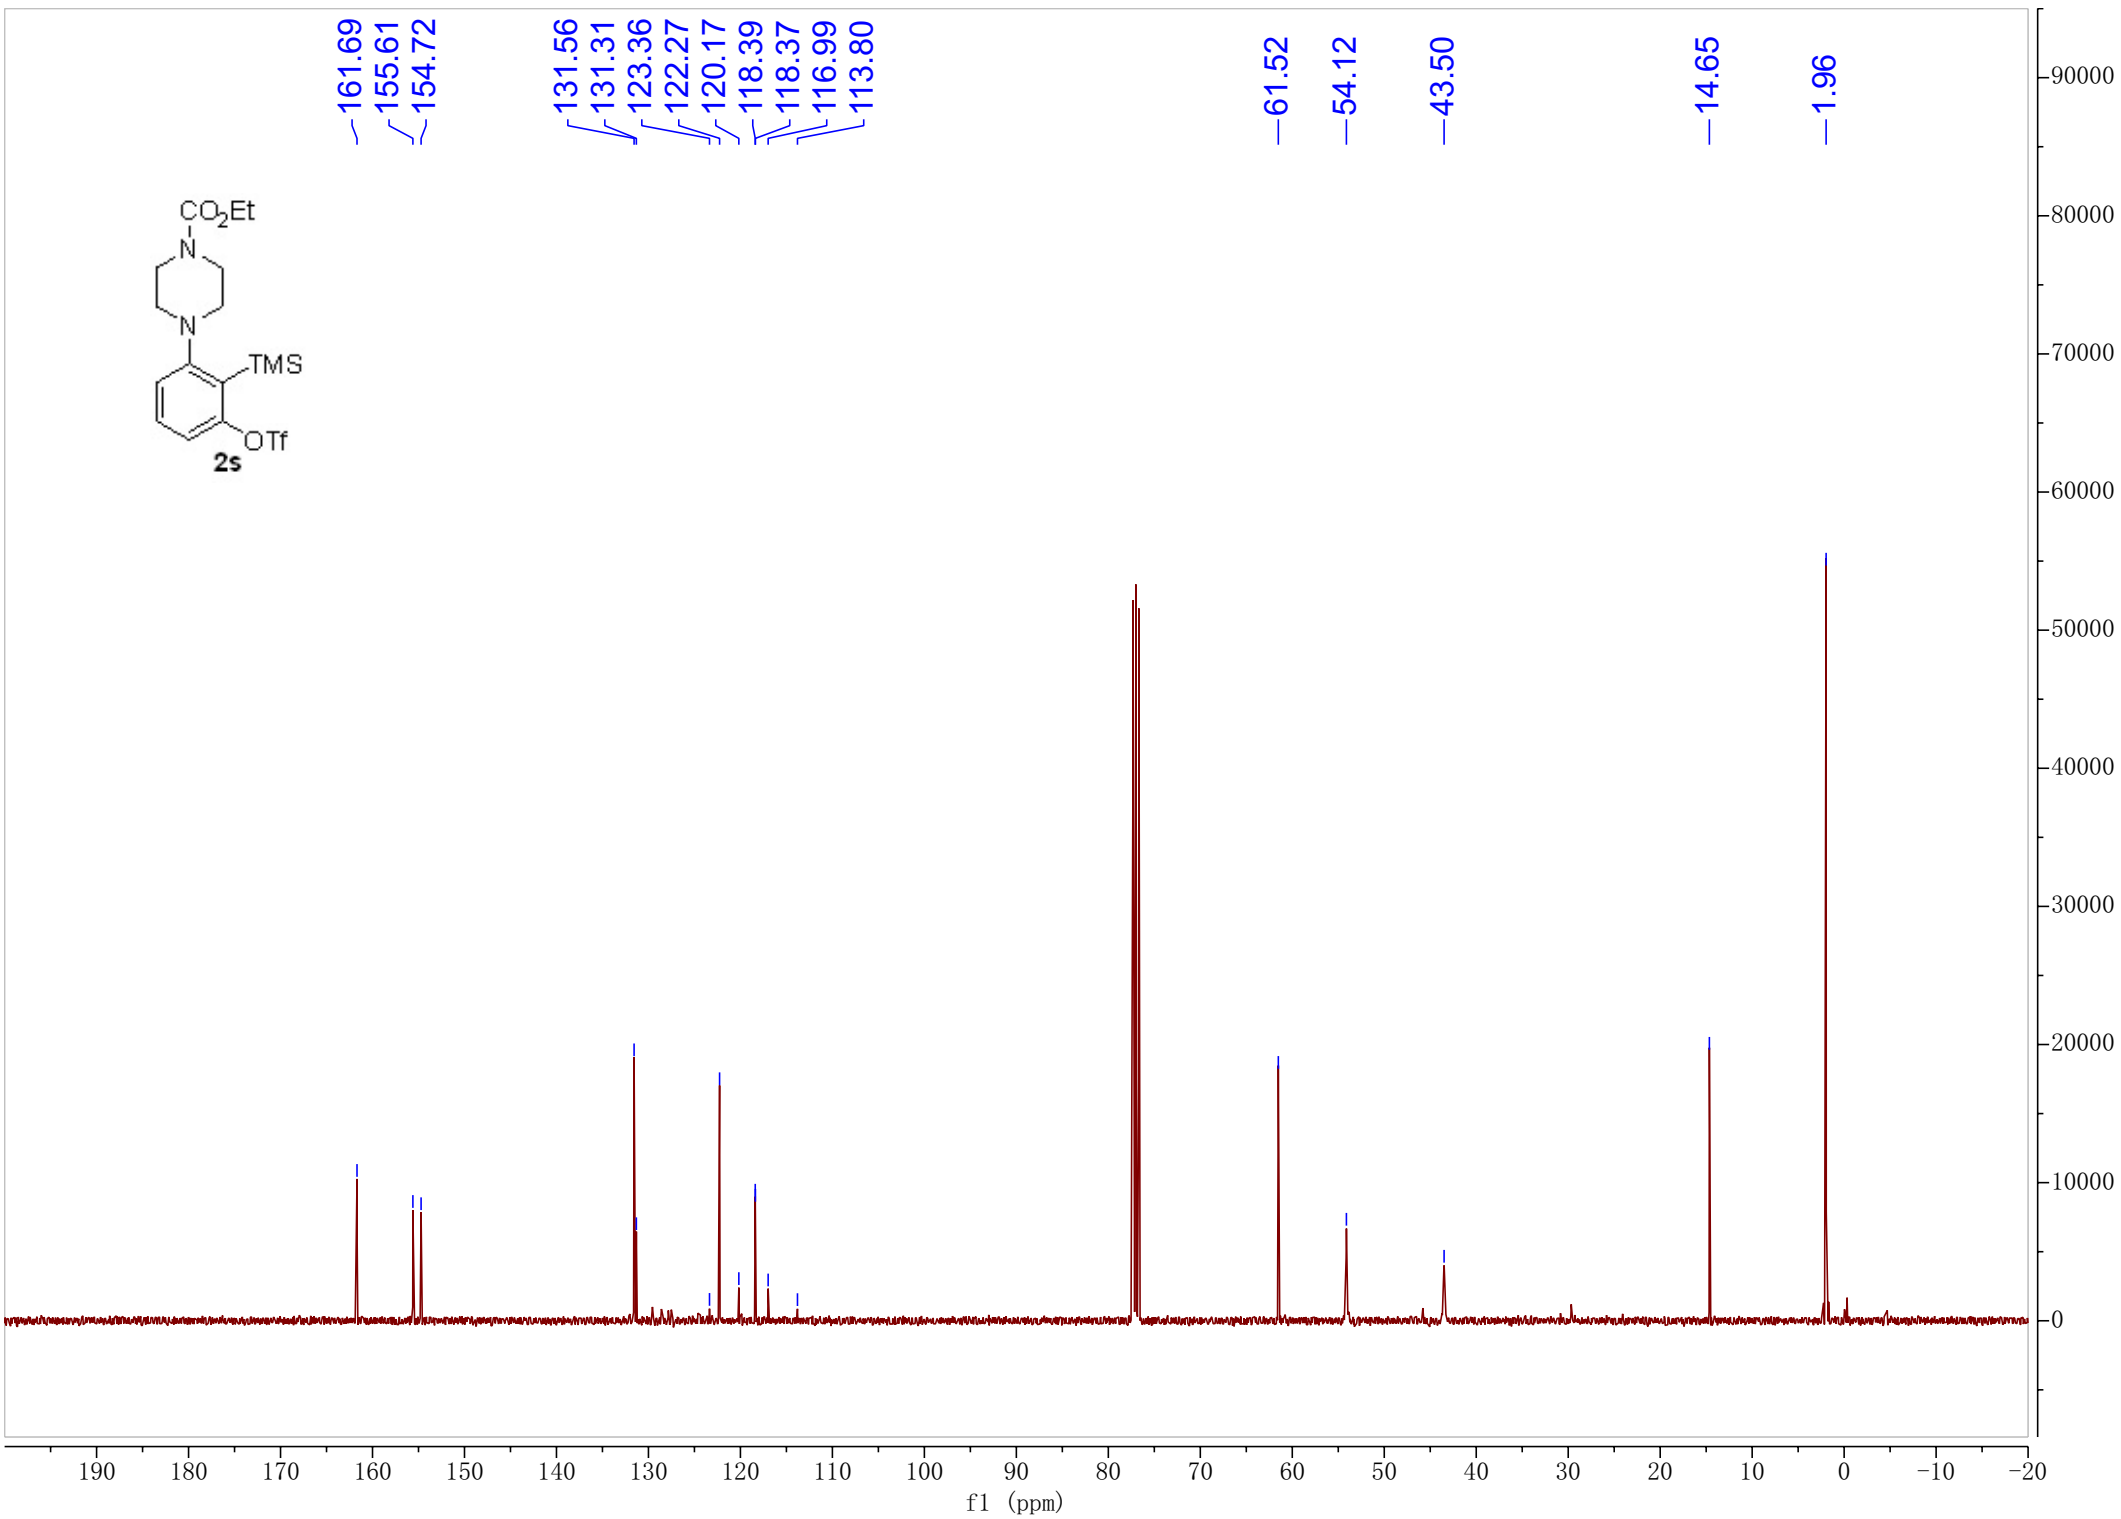

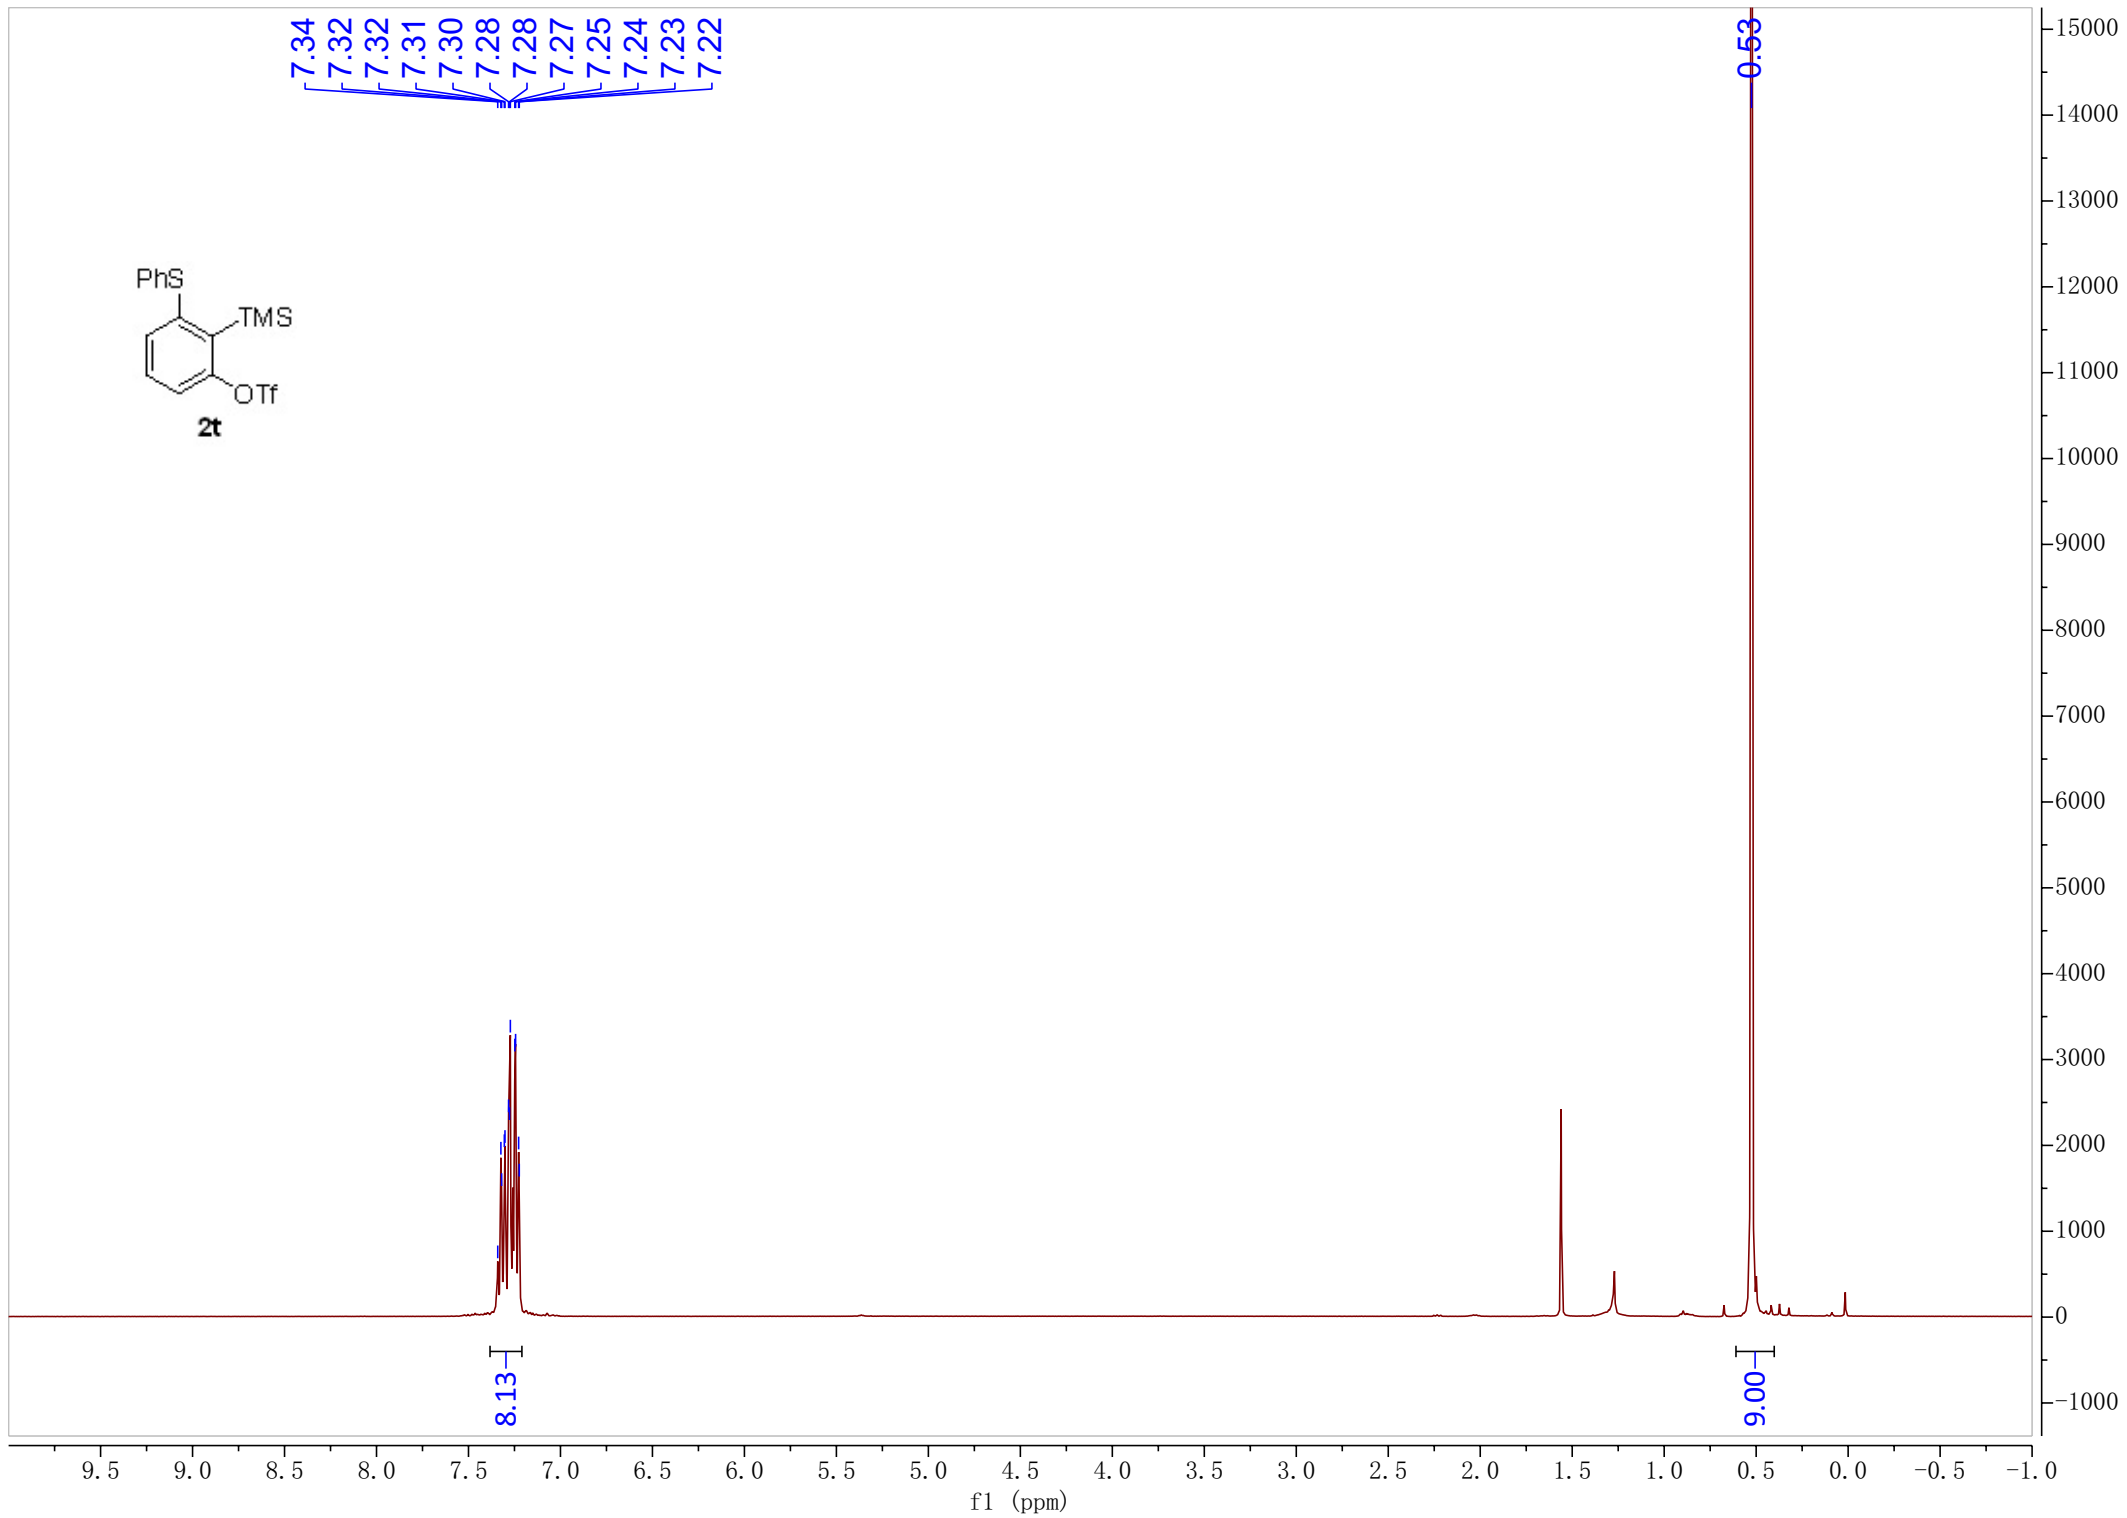

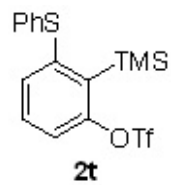

154.68  
145.62  
136.74  
135.22  
133.16  
130.92  
130.38  
129.38  
127.12  
119.66  
119.15  
117.53

2.14

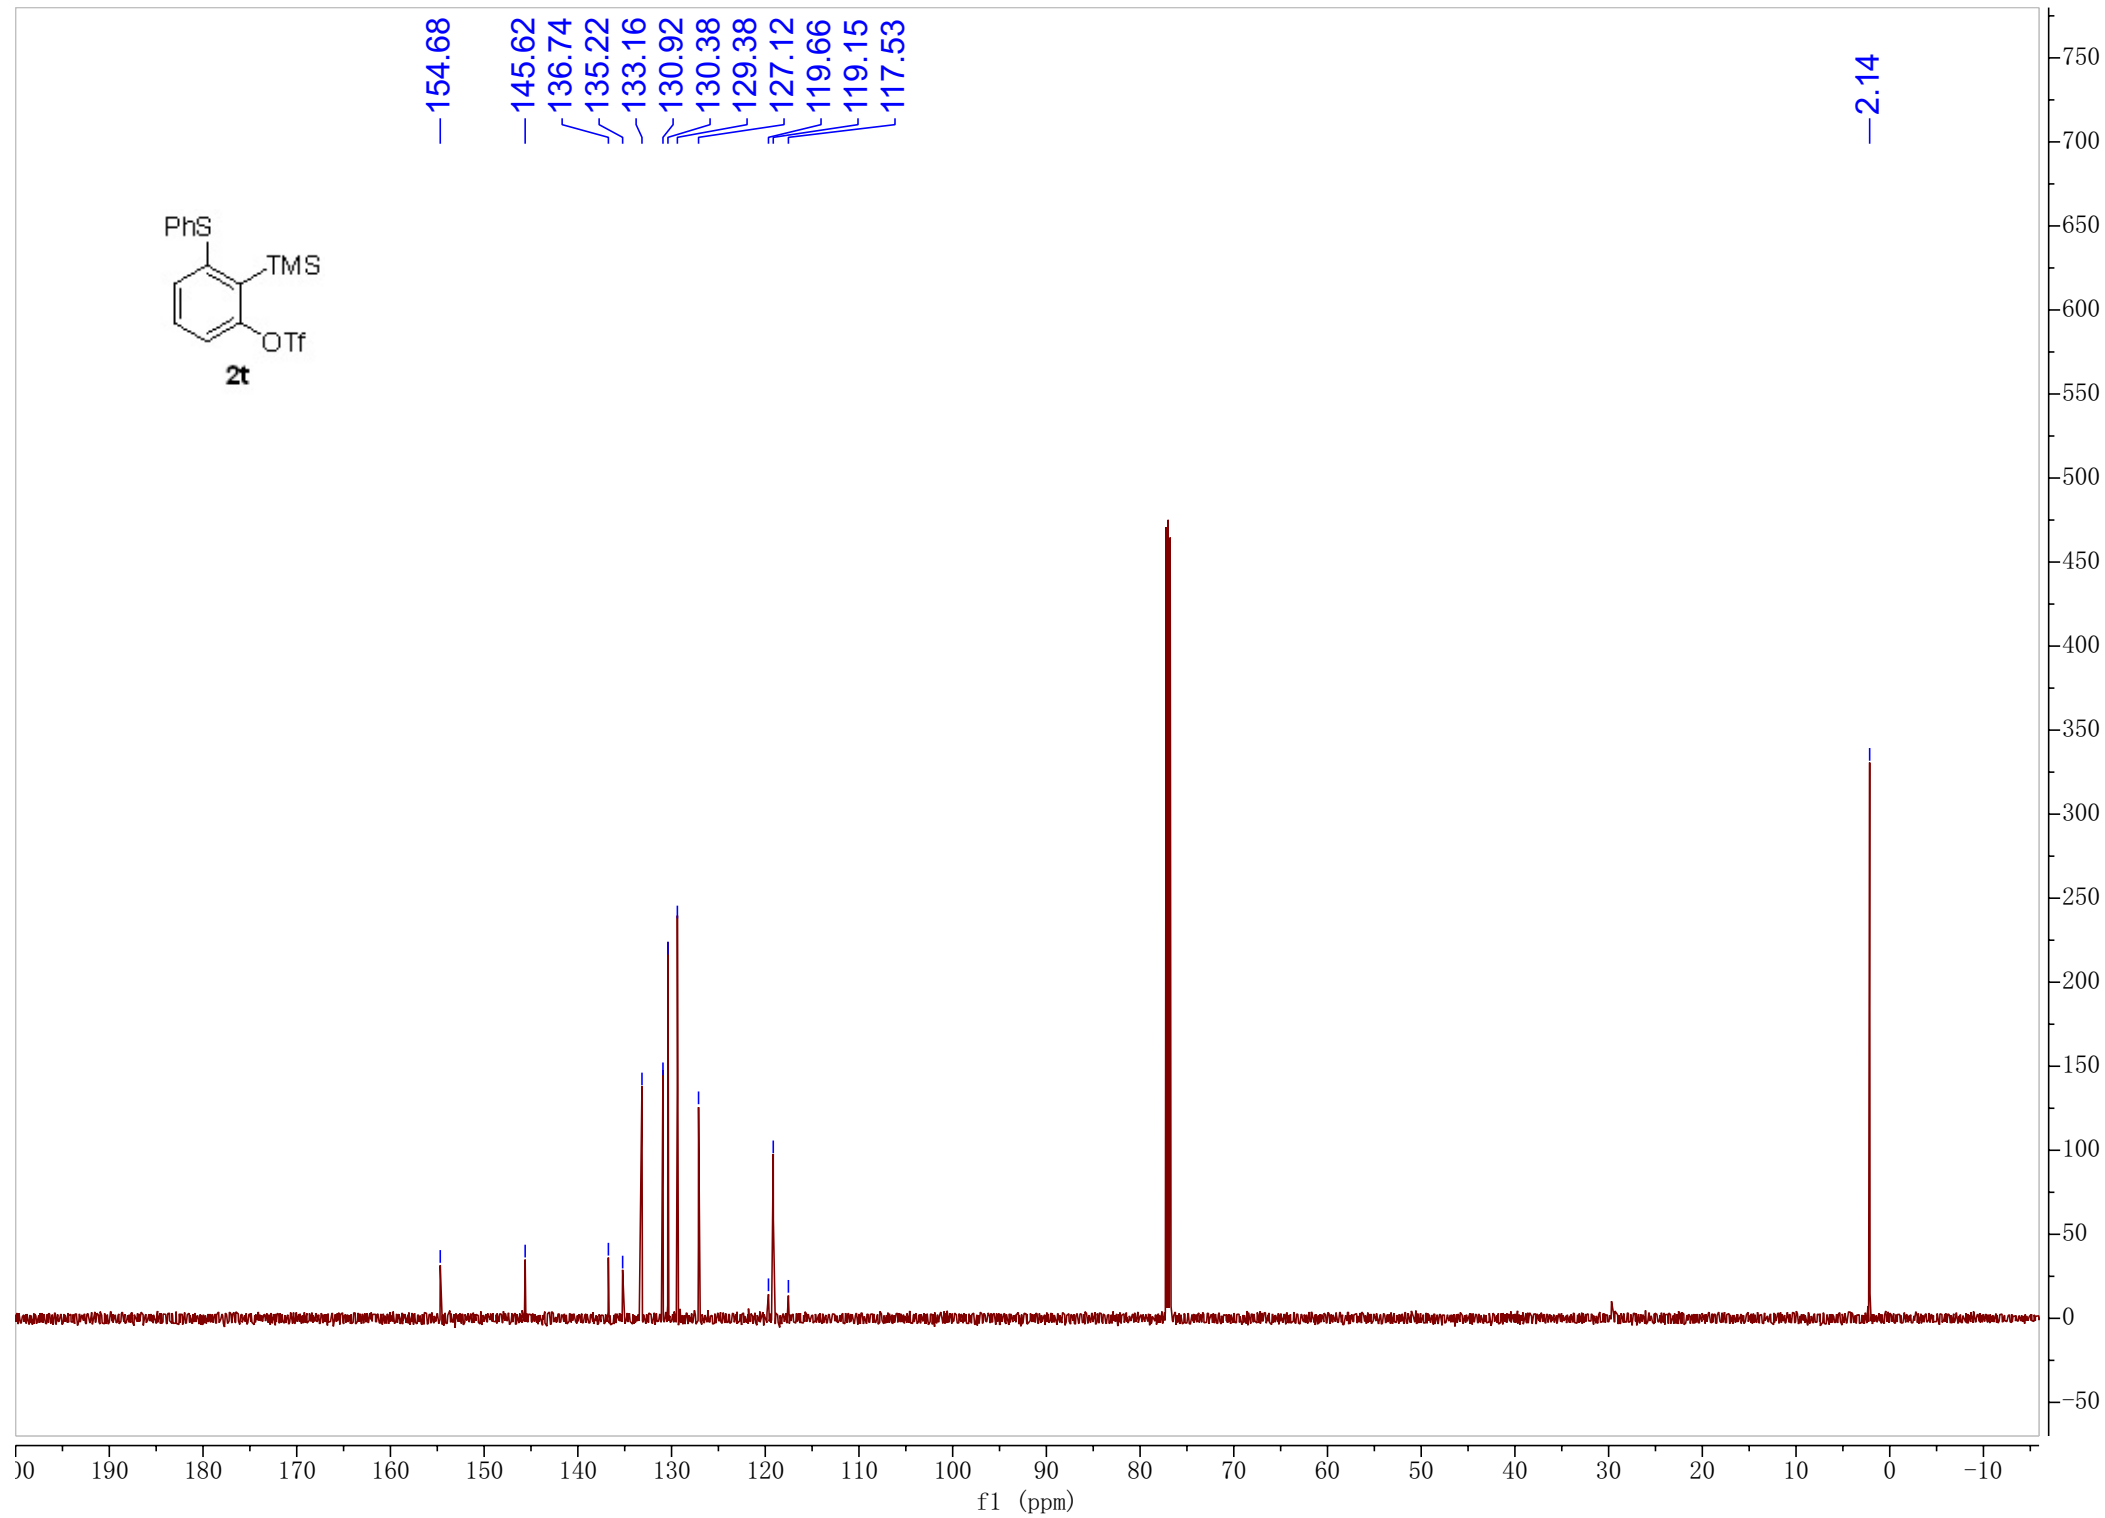

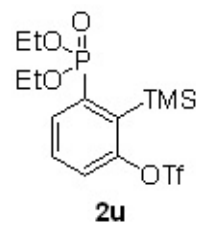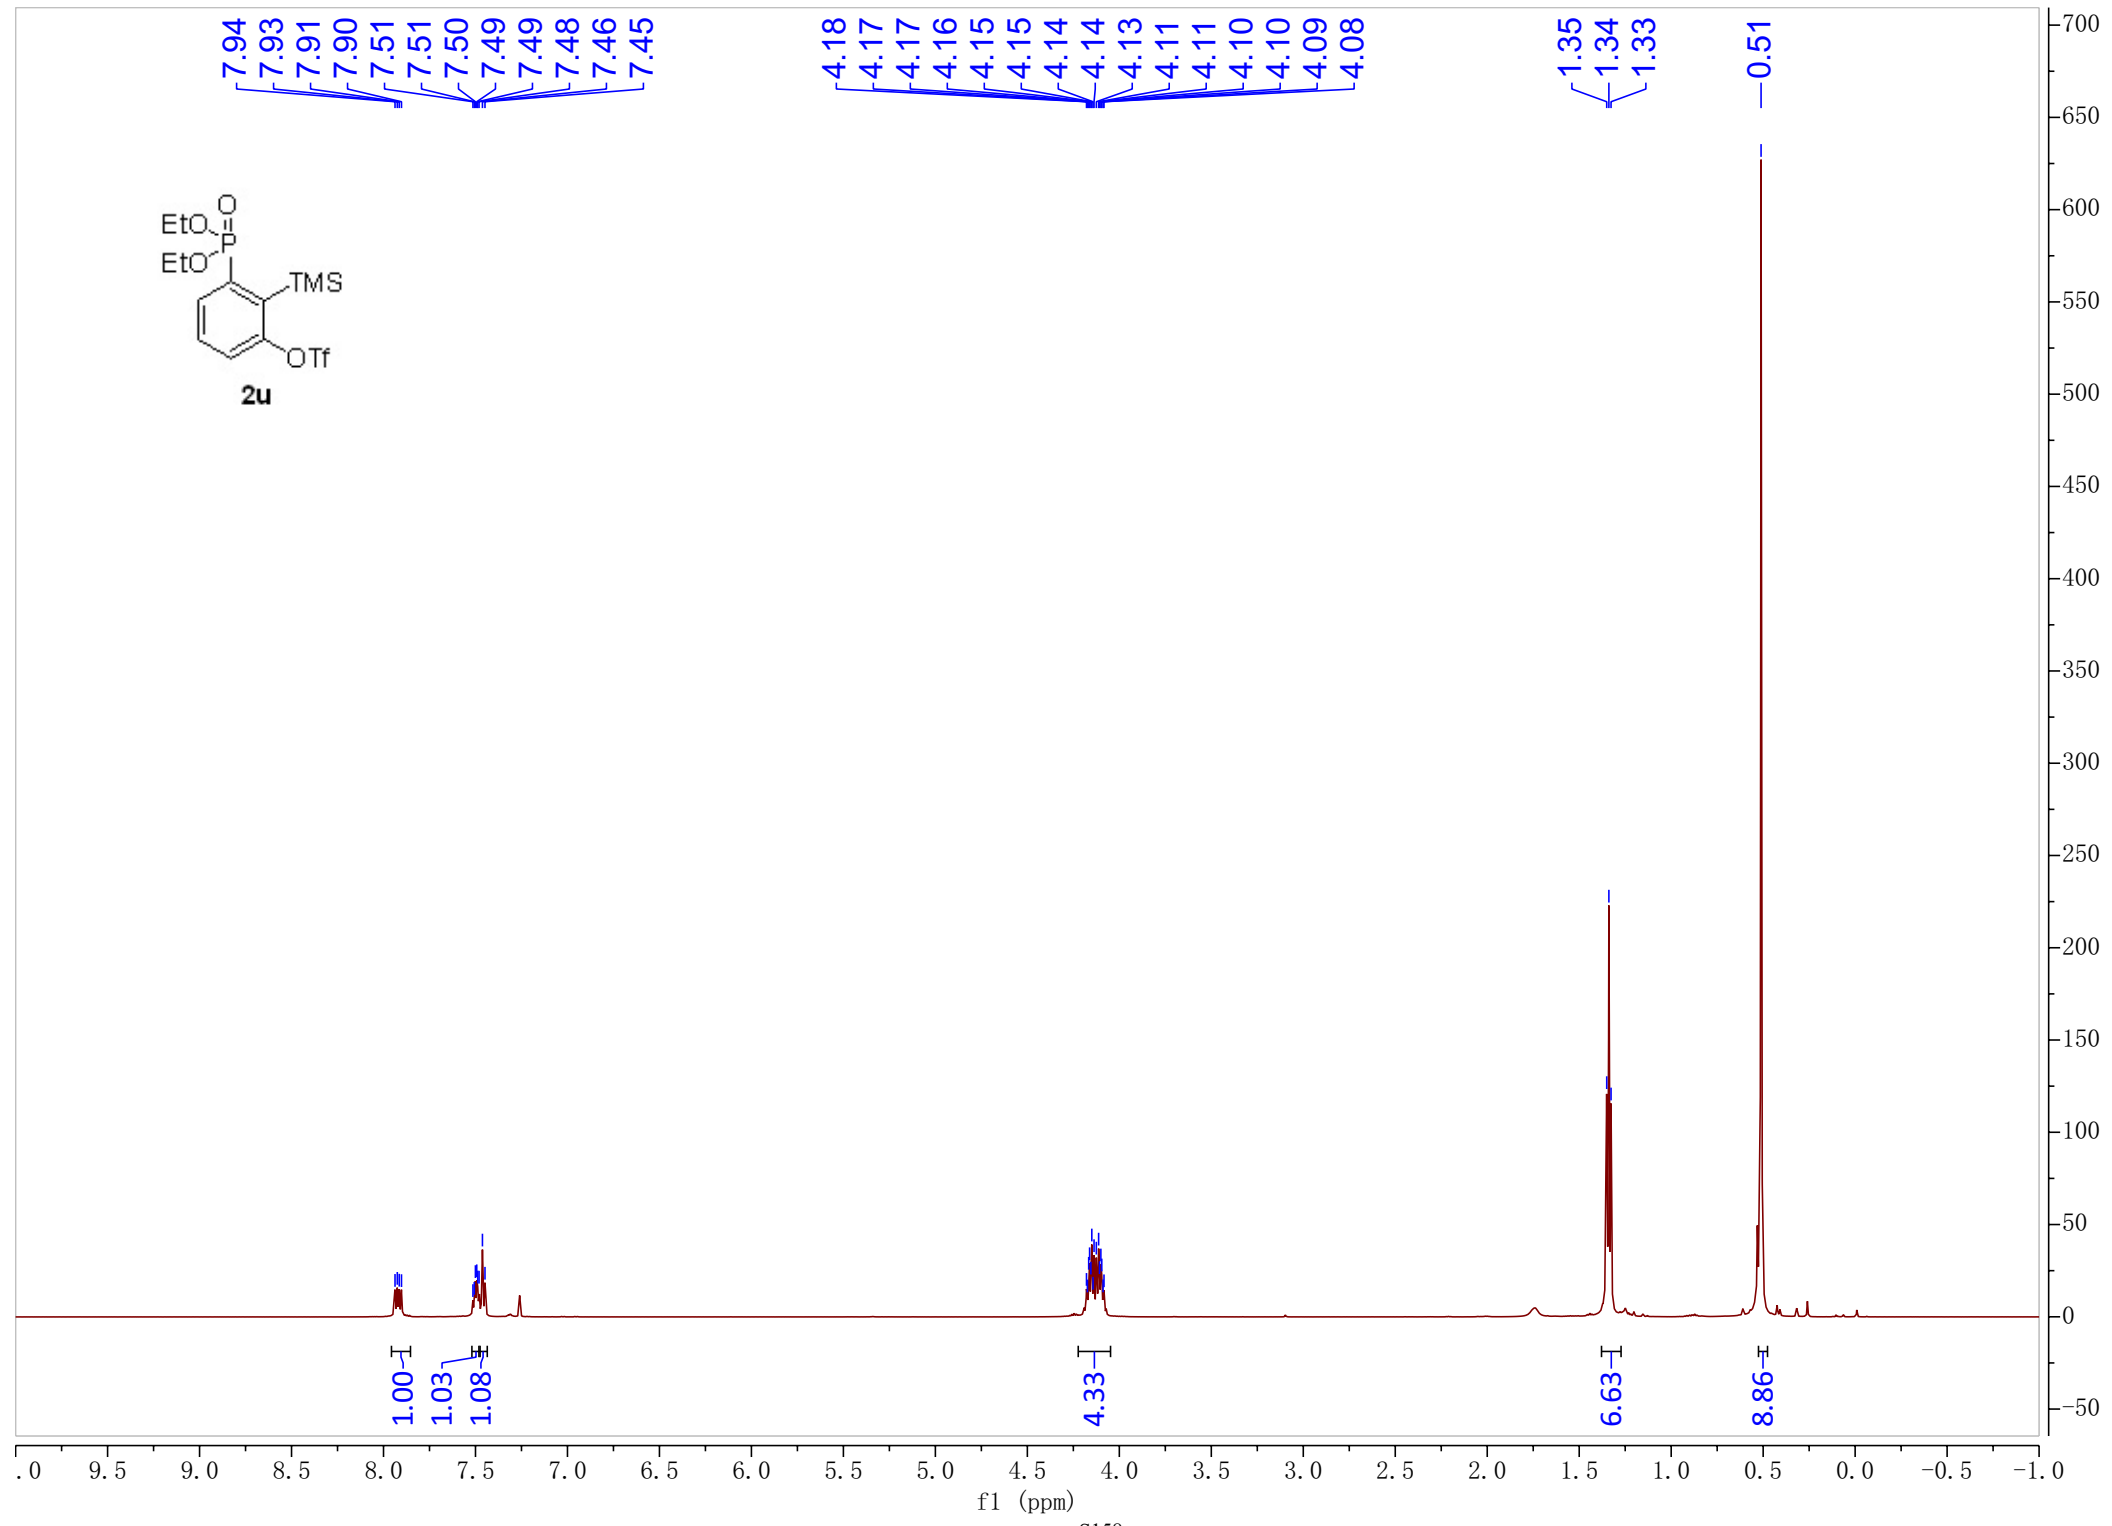

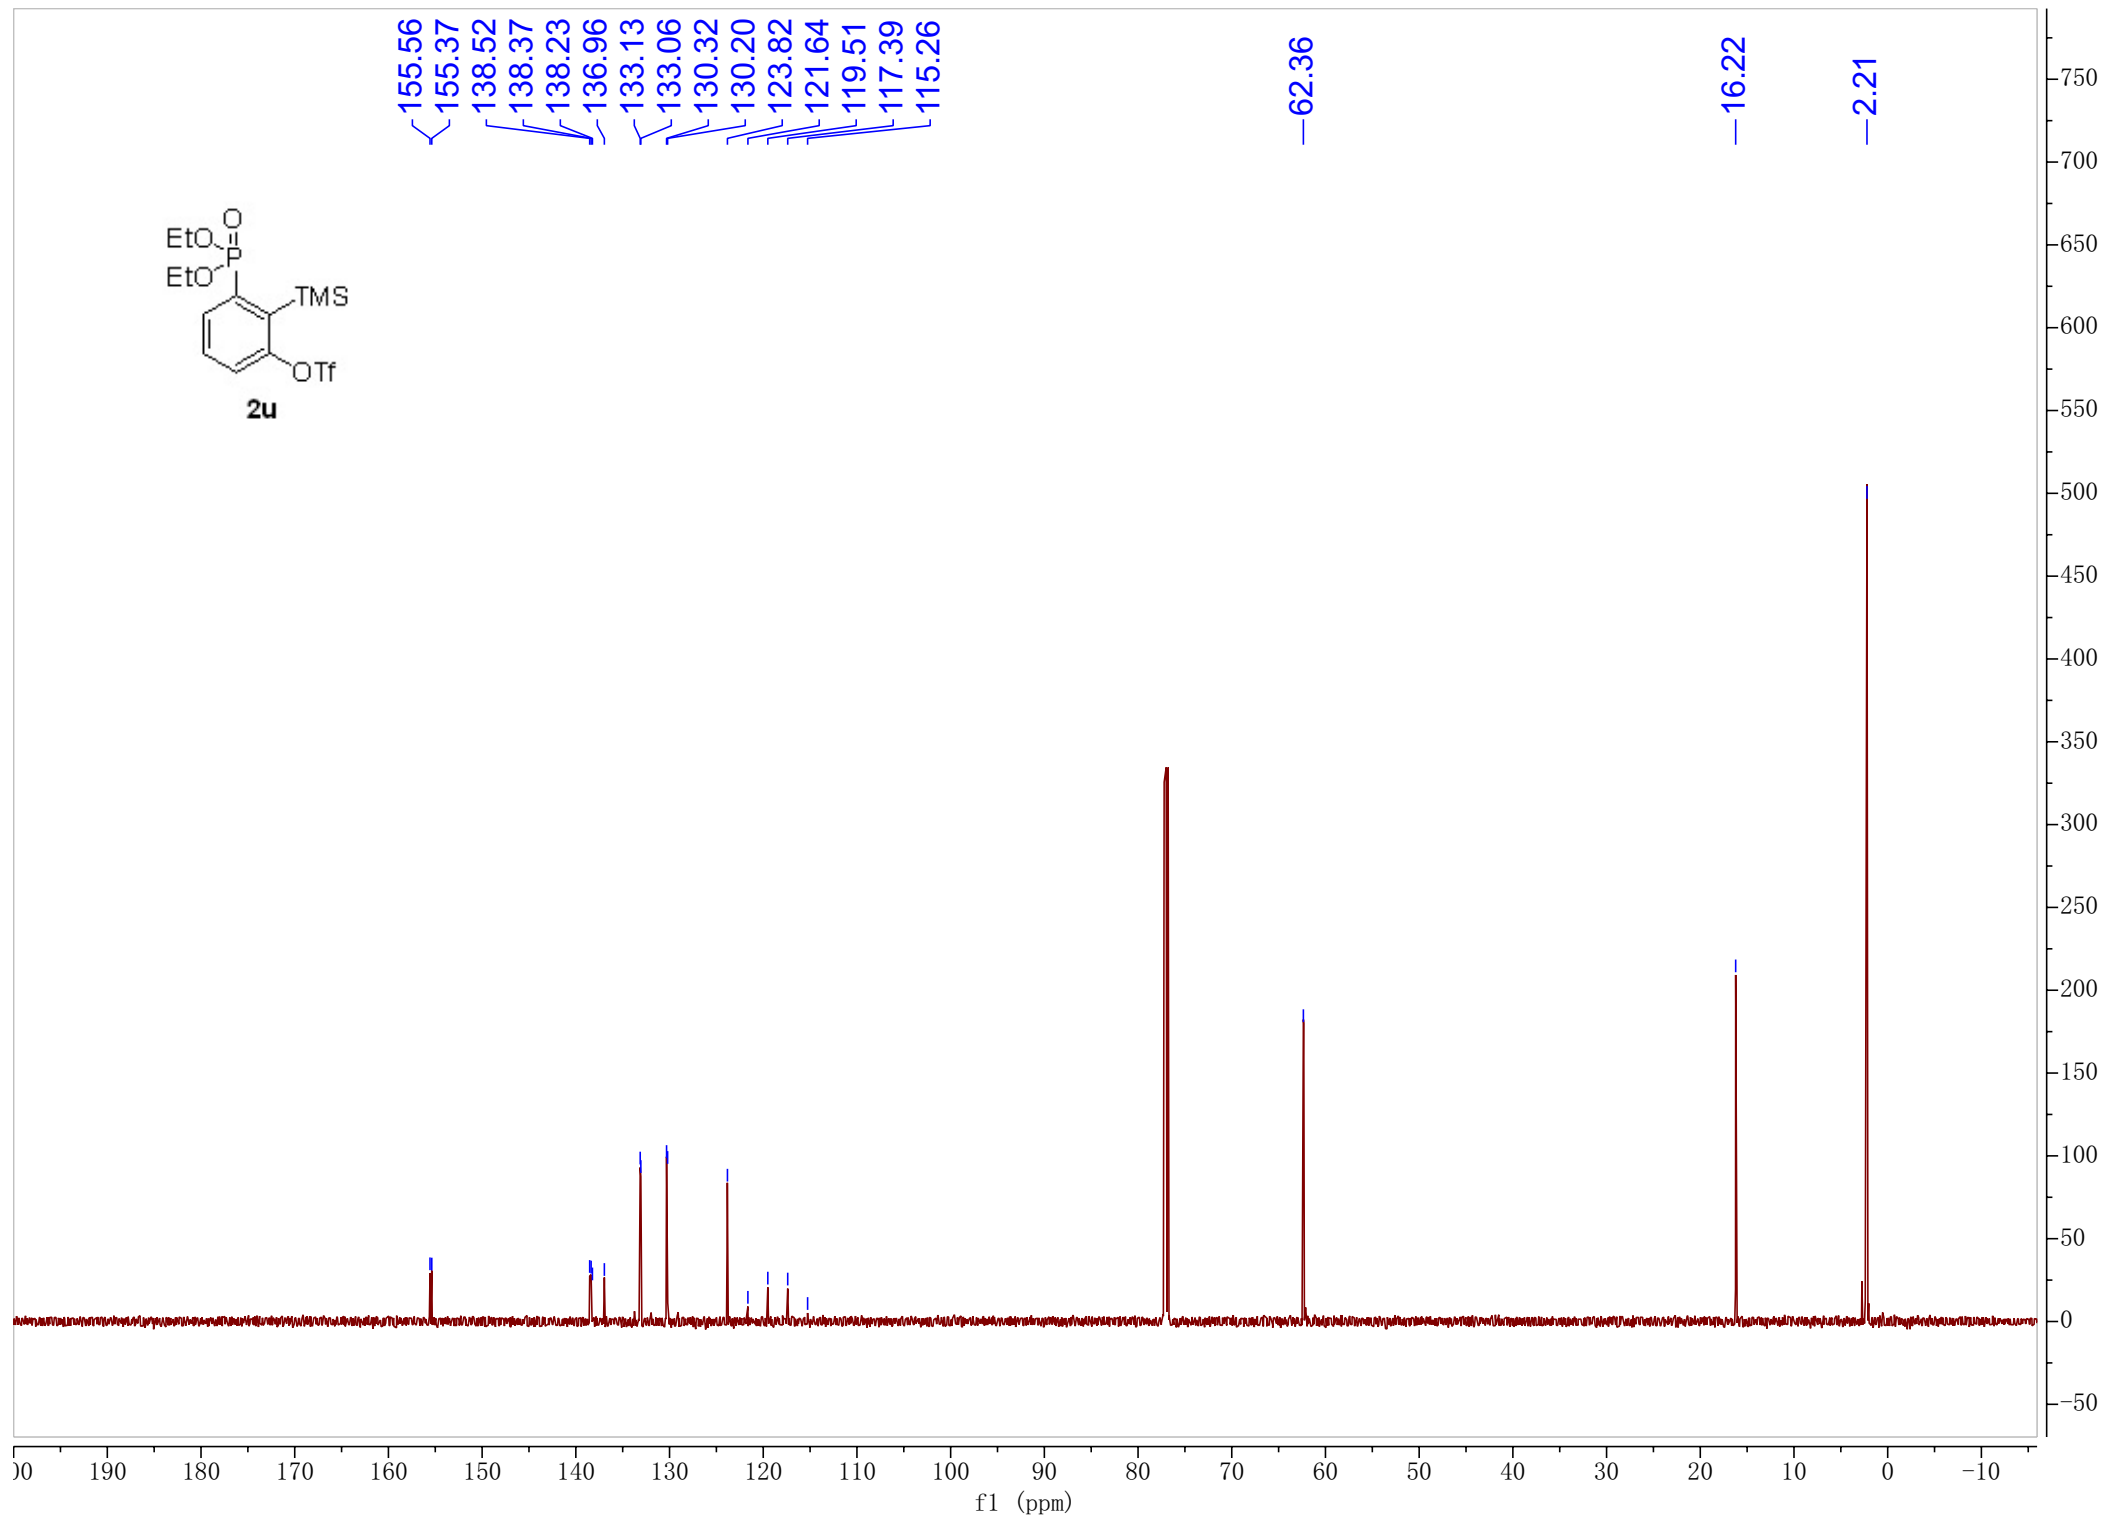

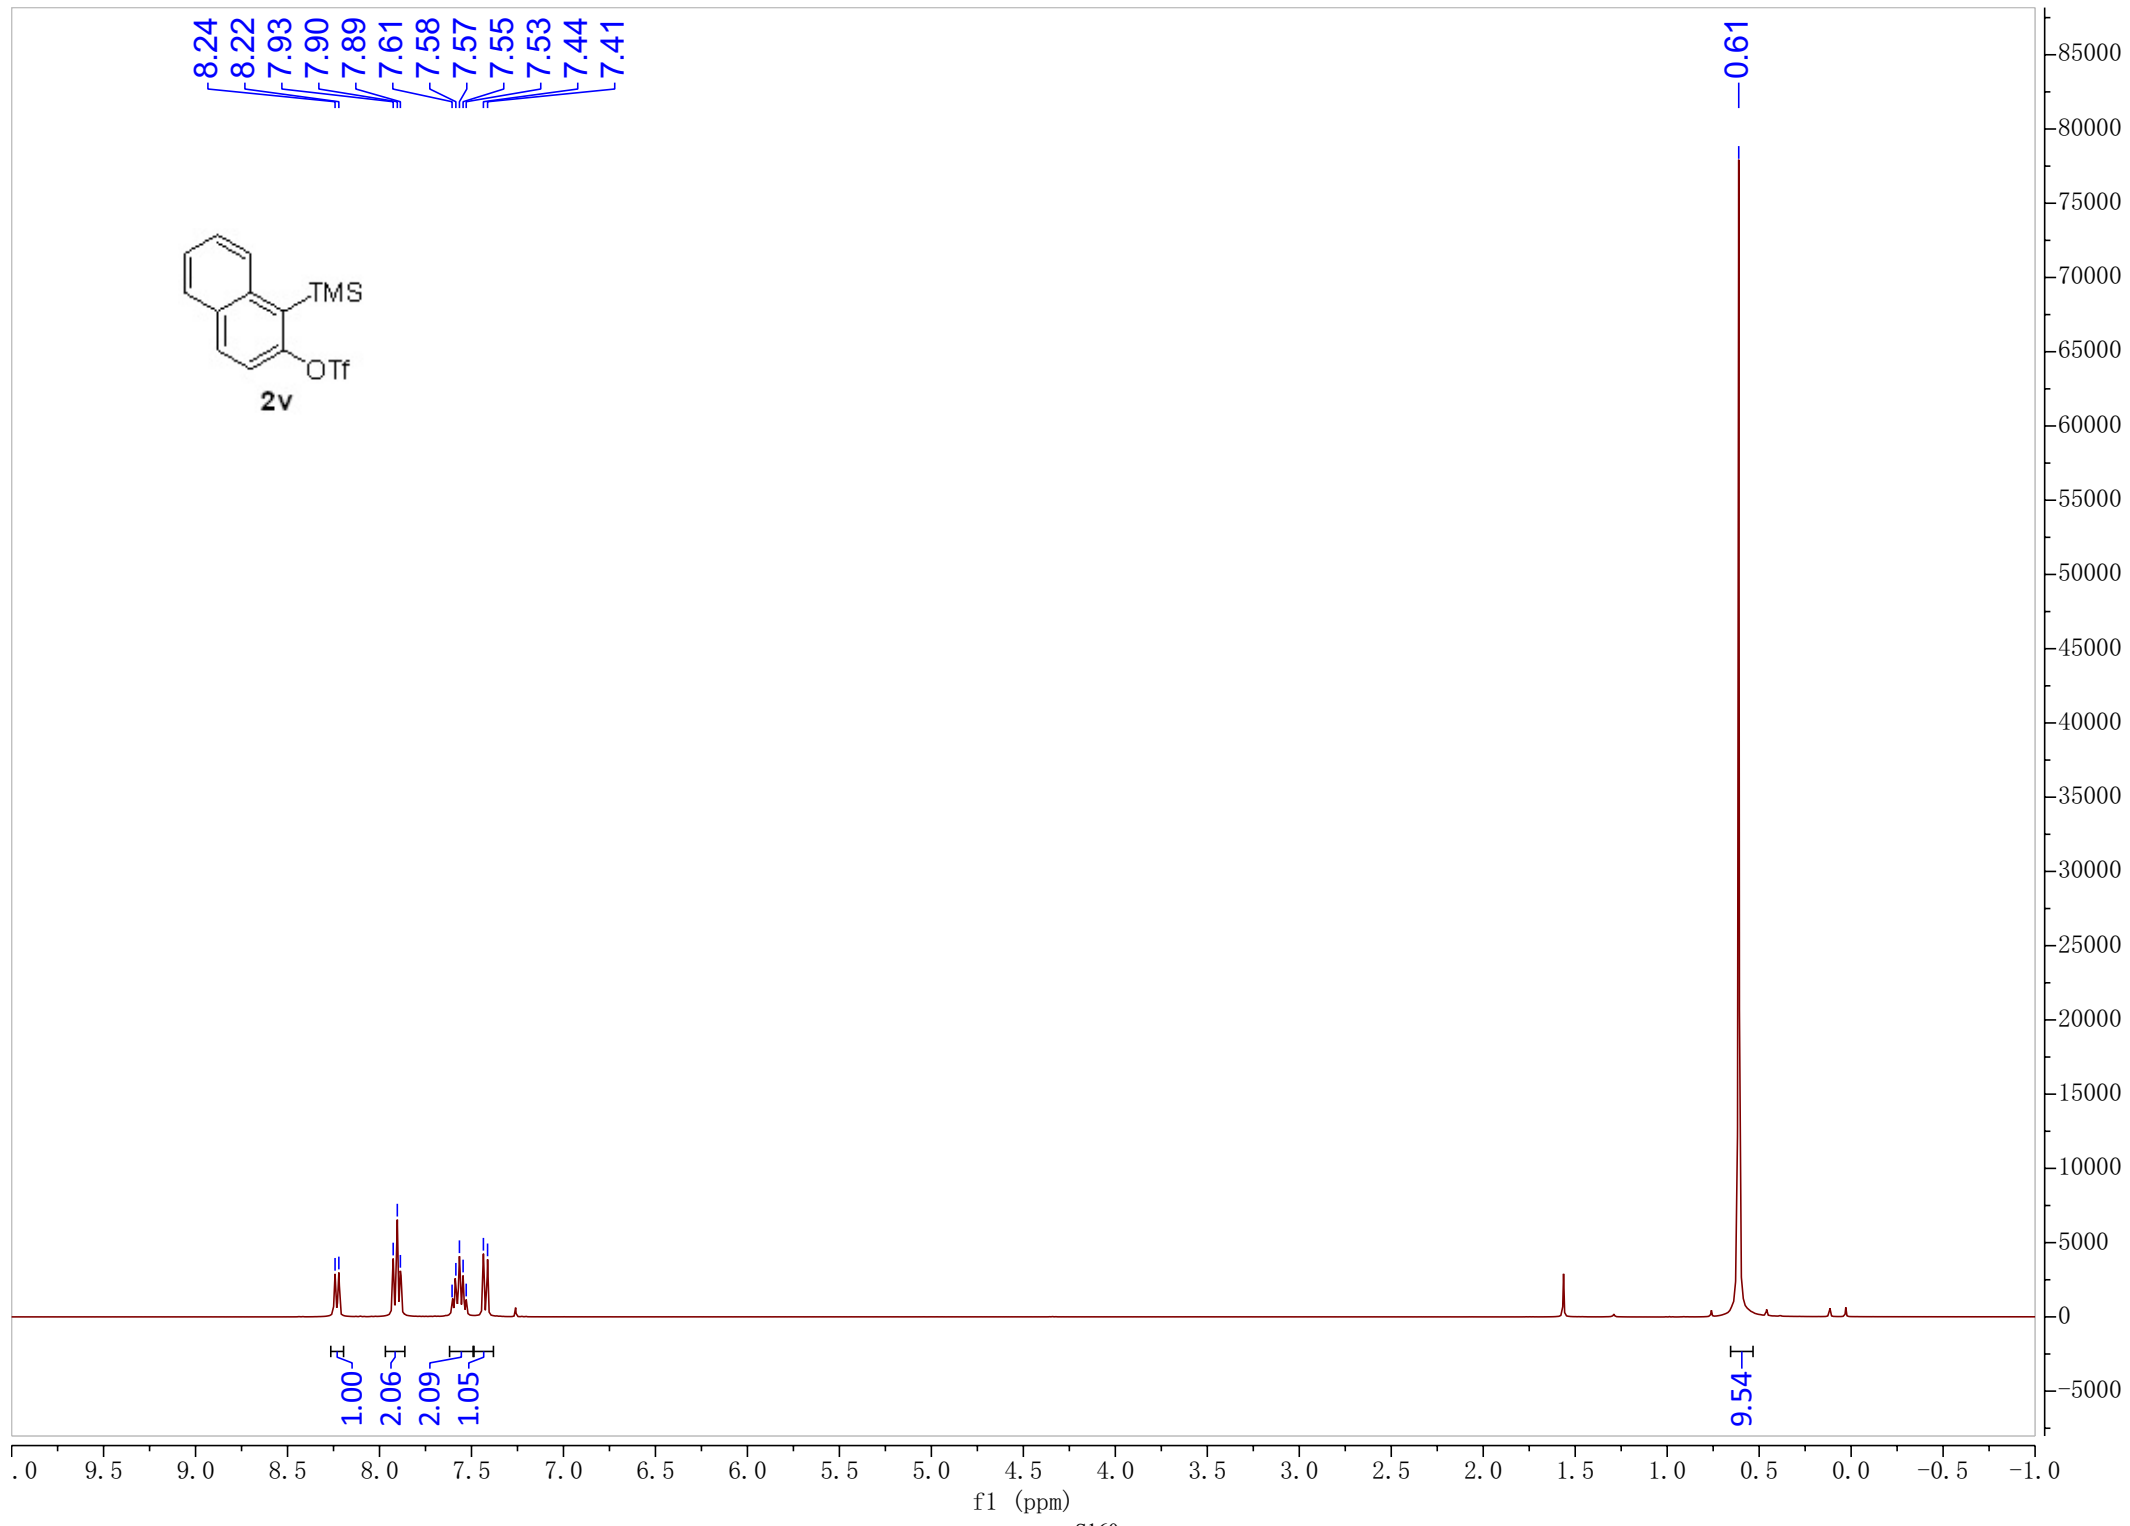



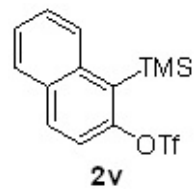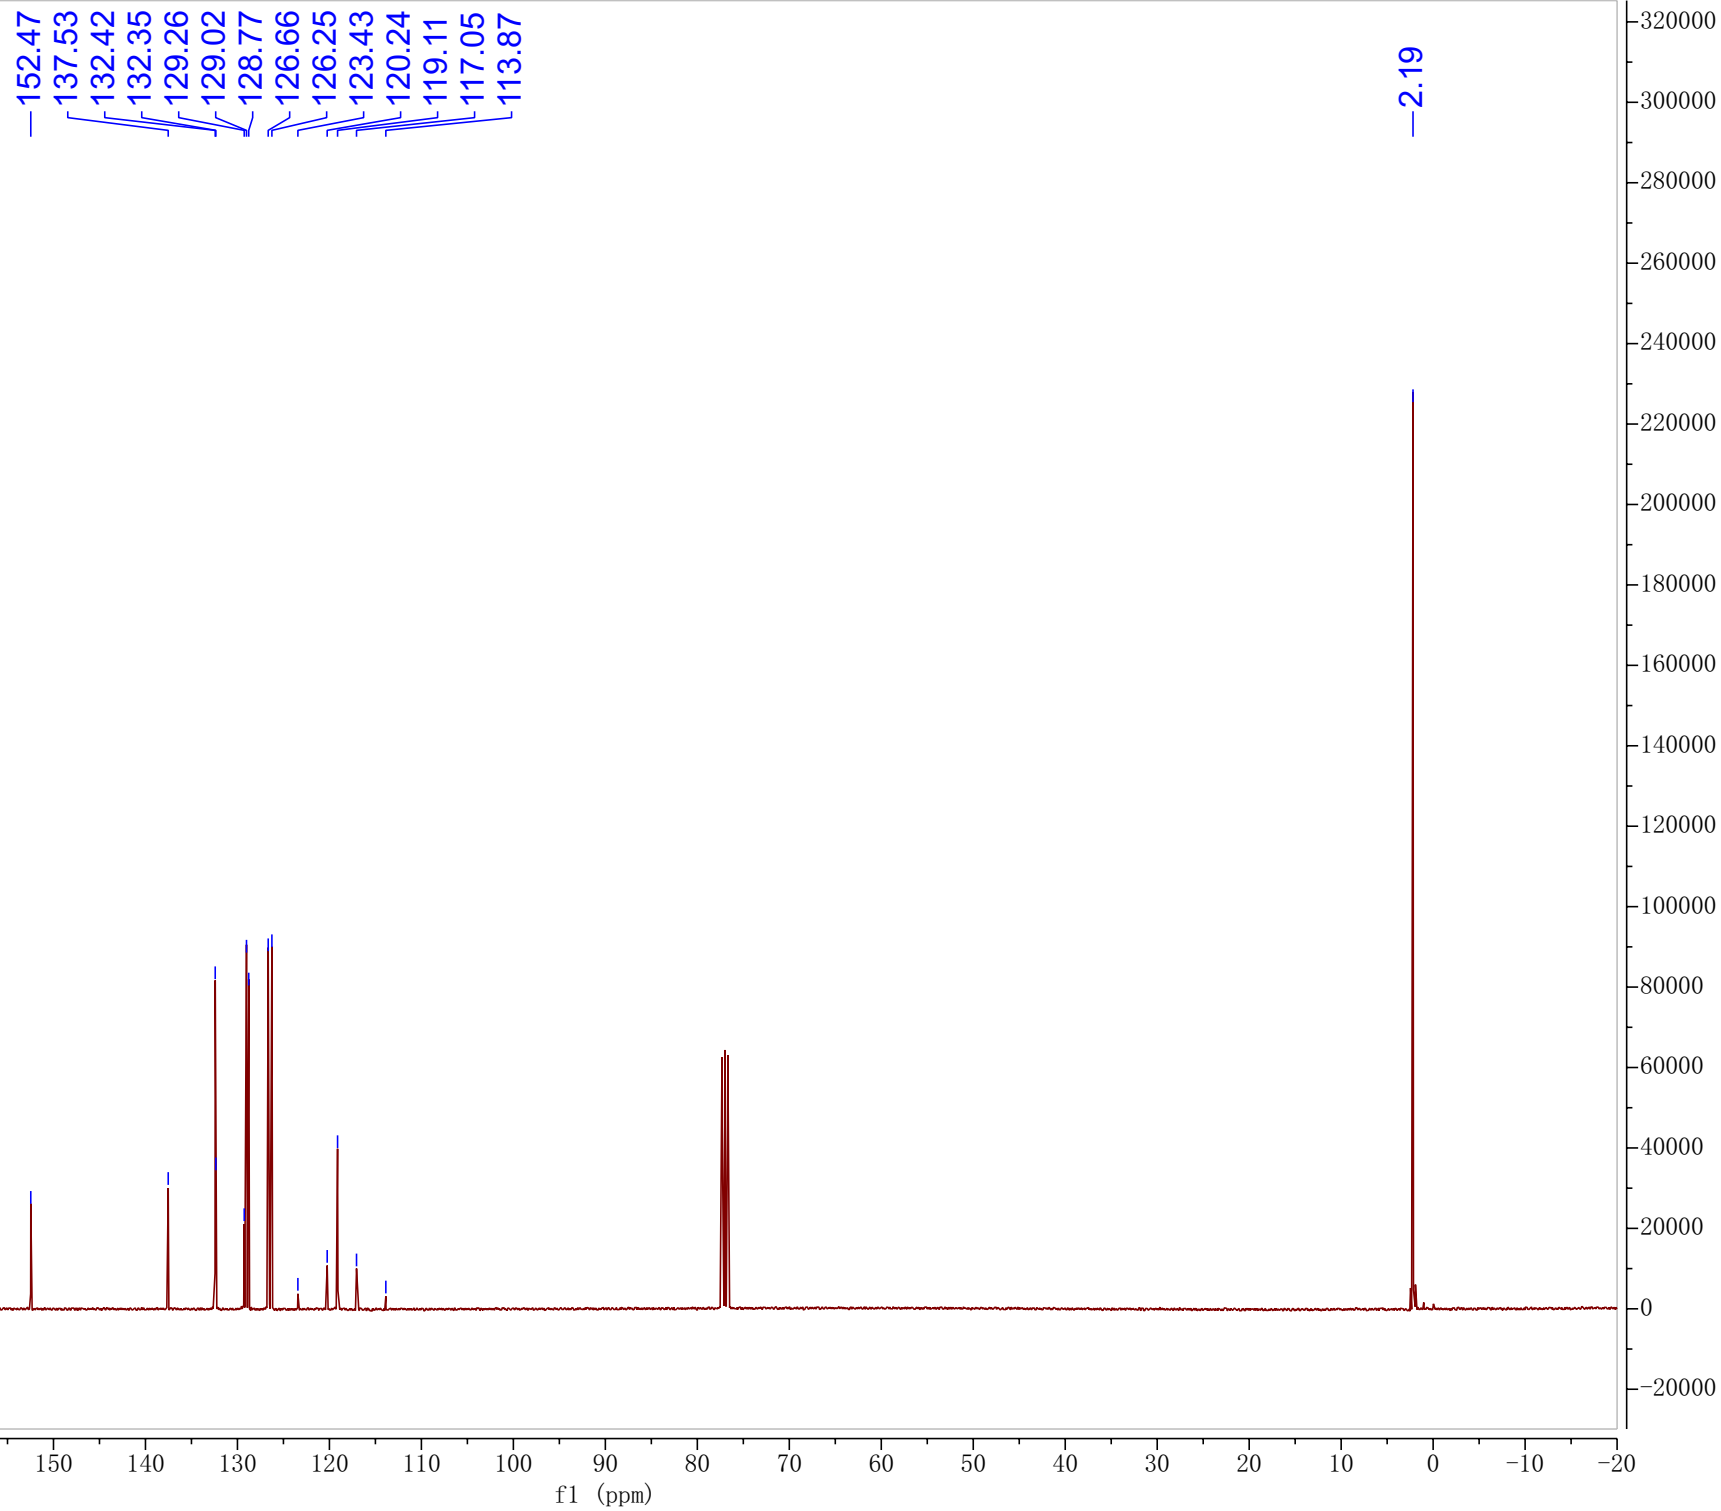

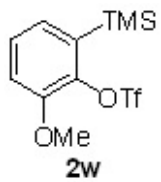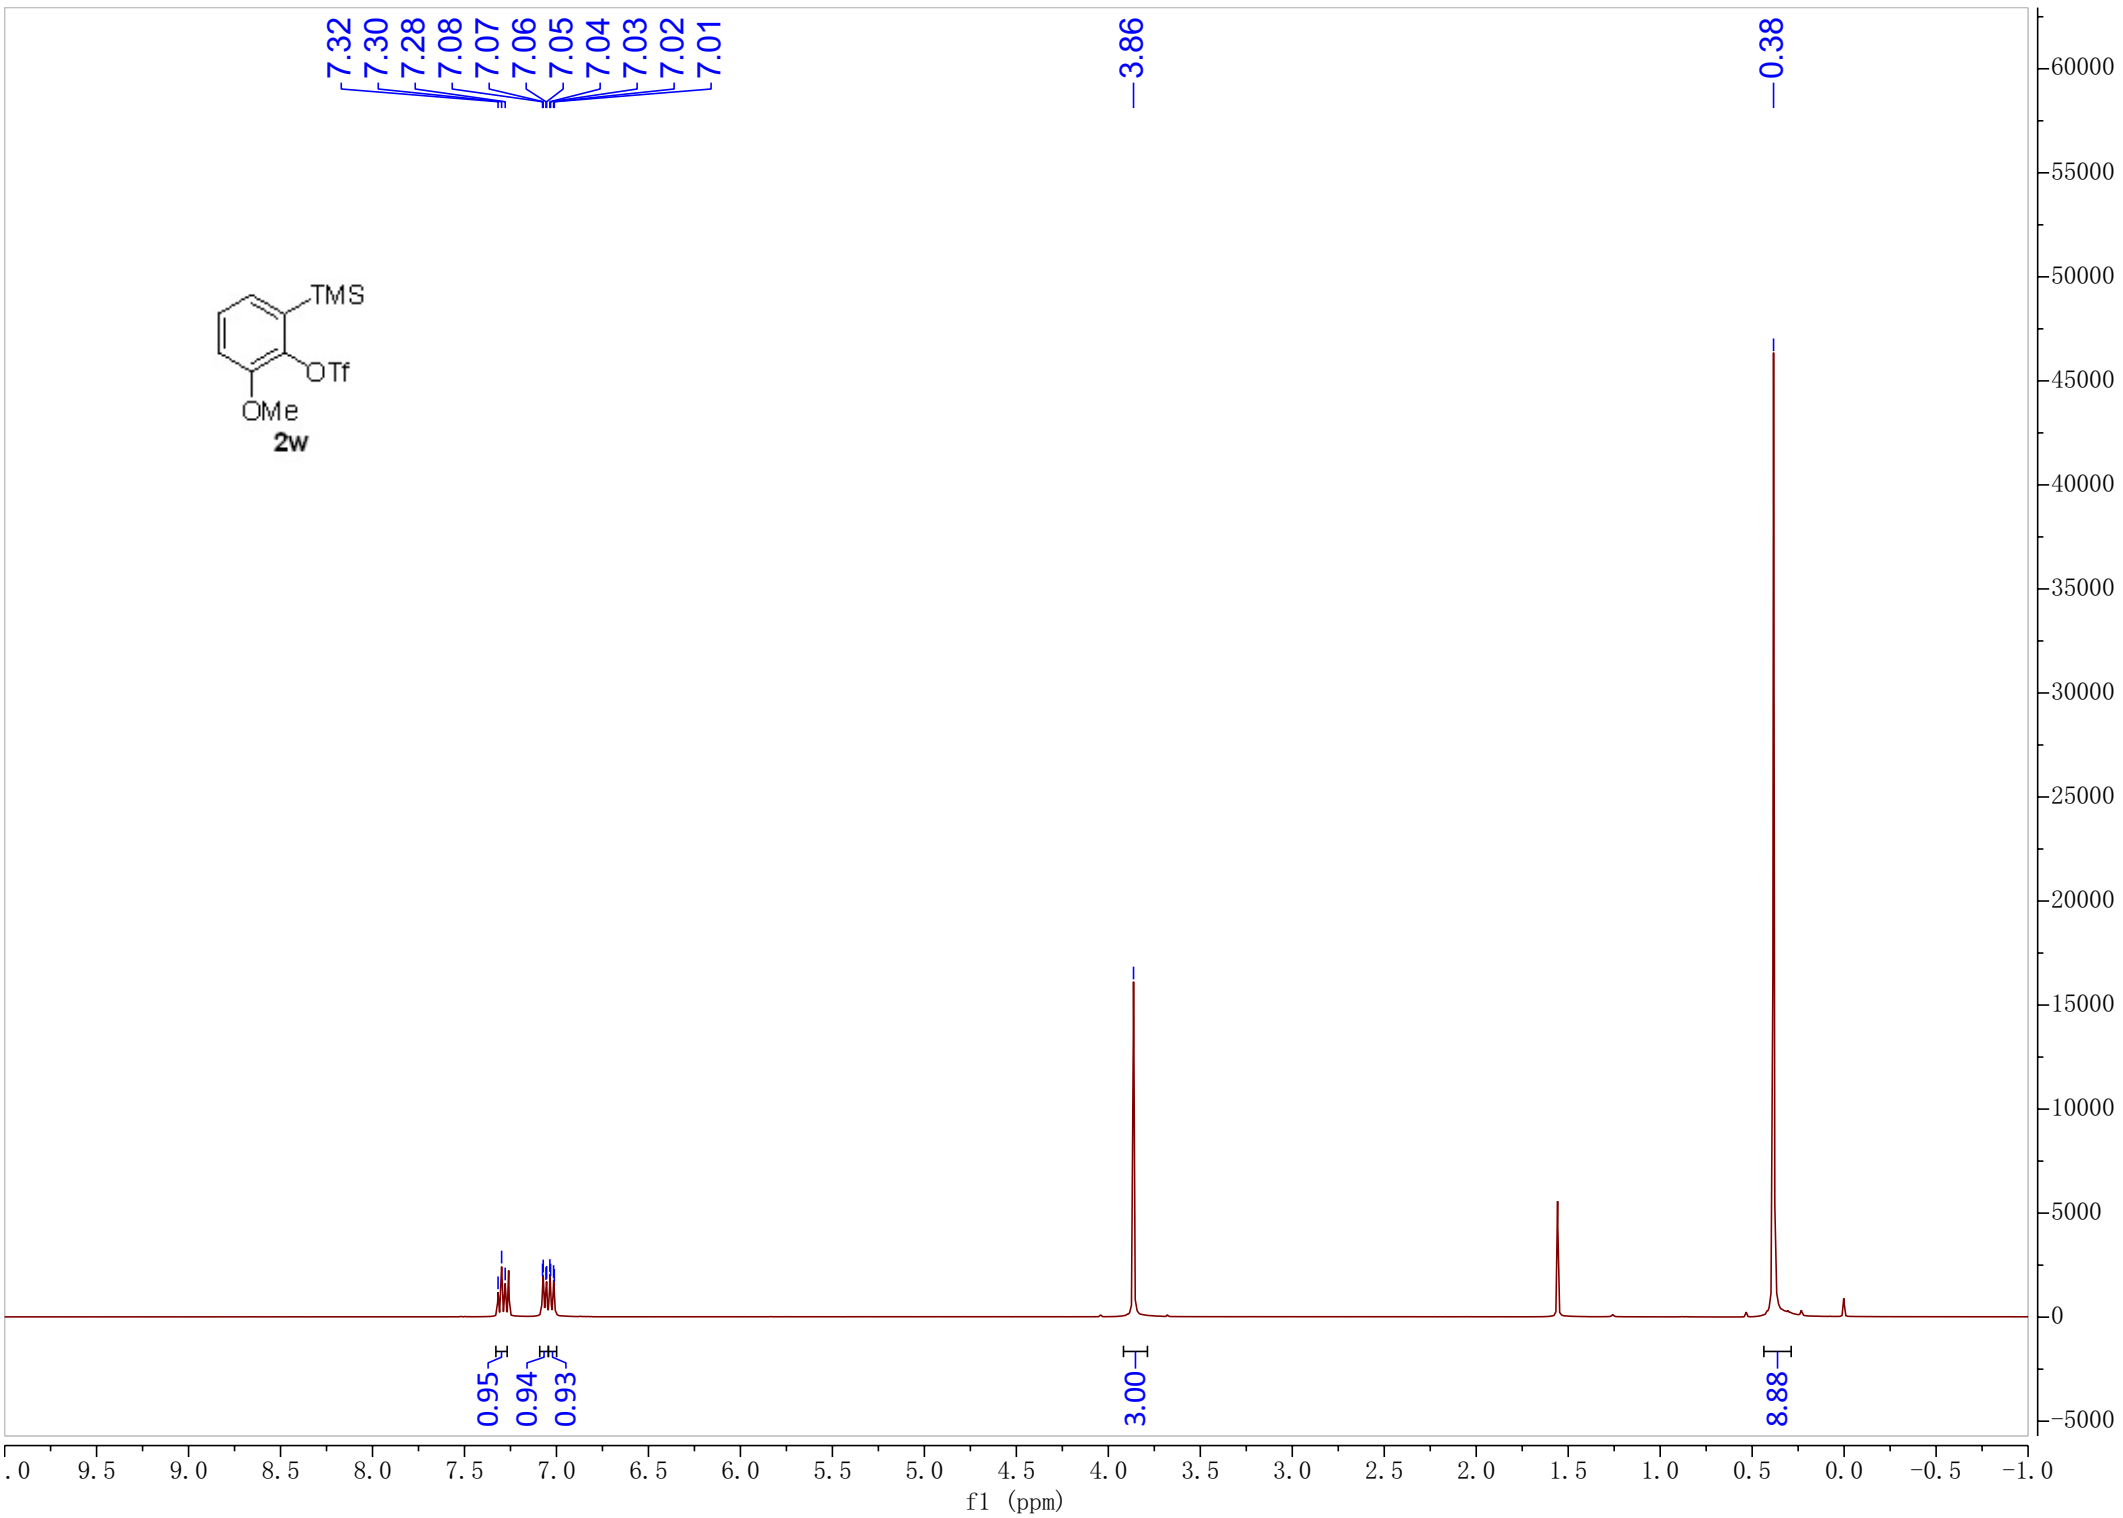

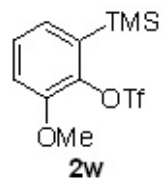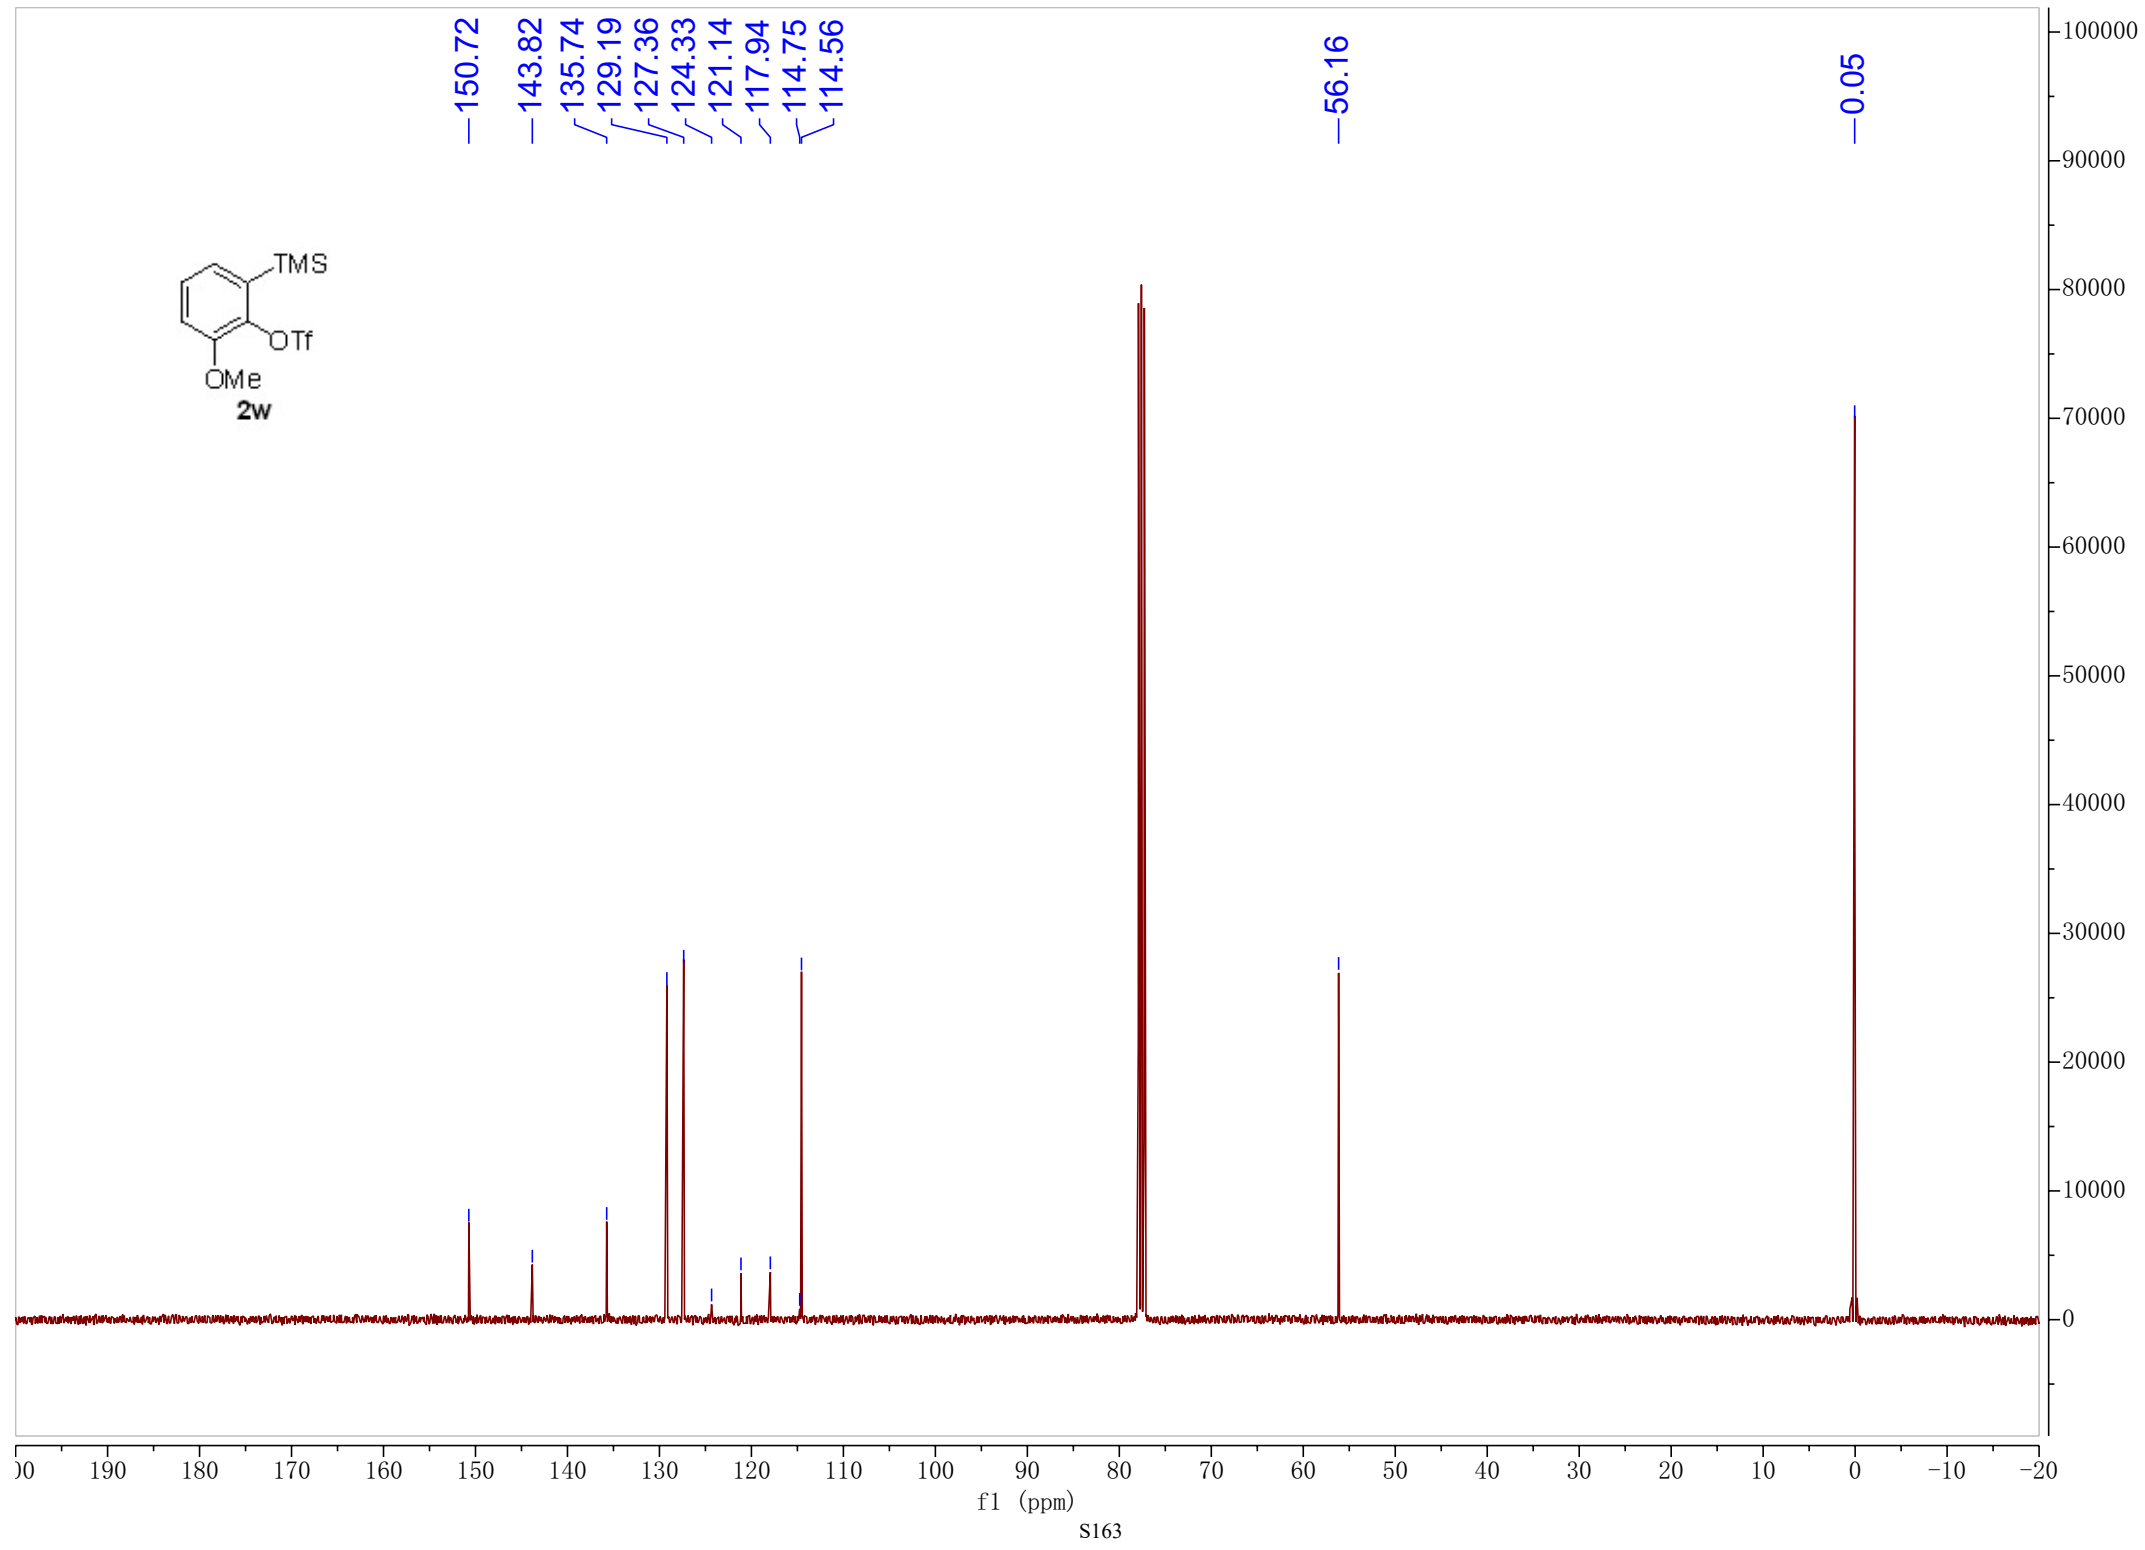

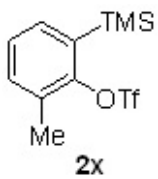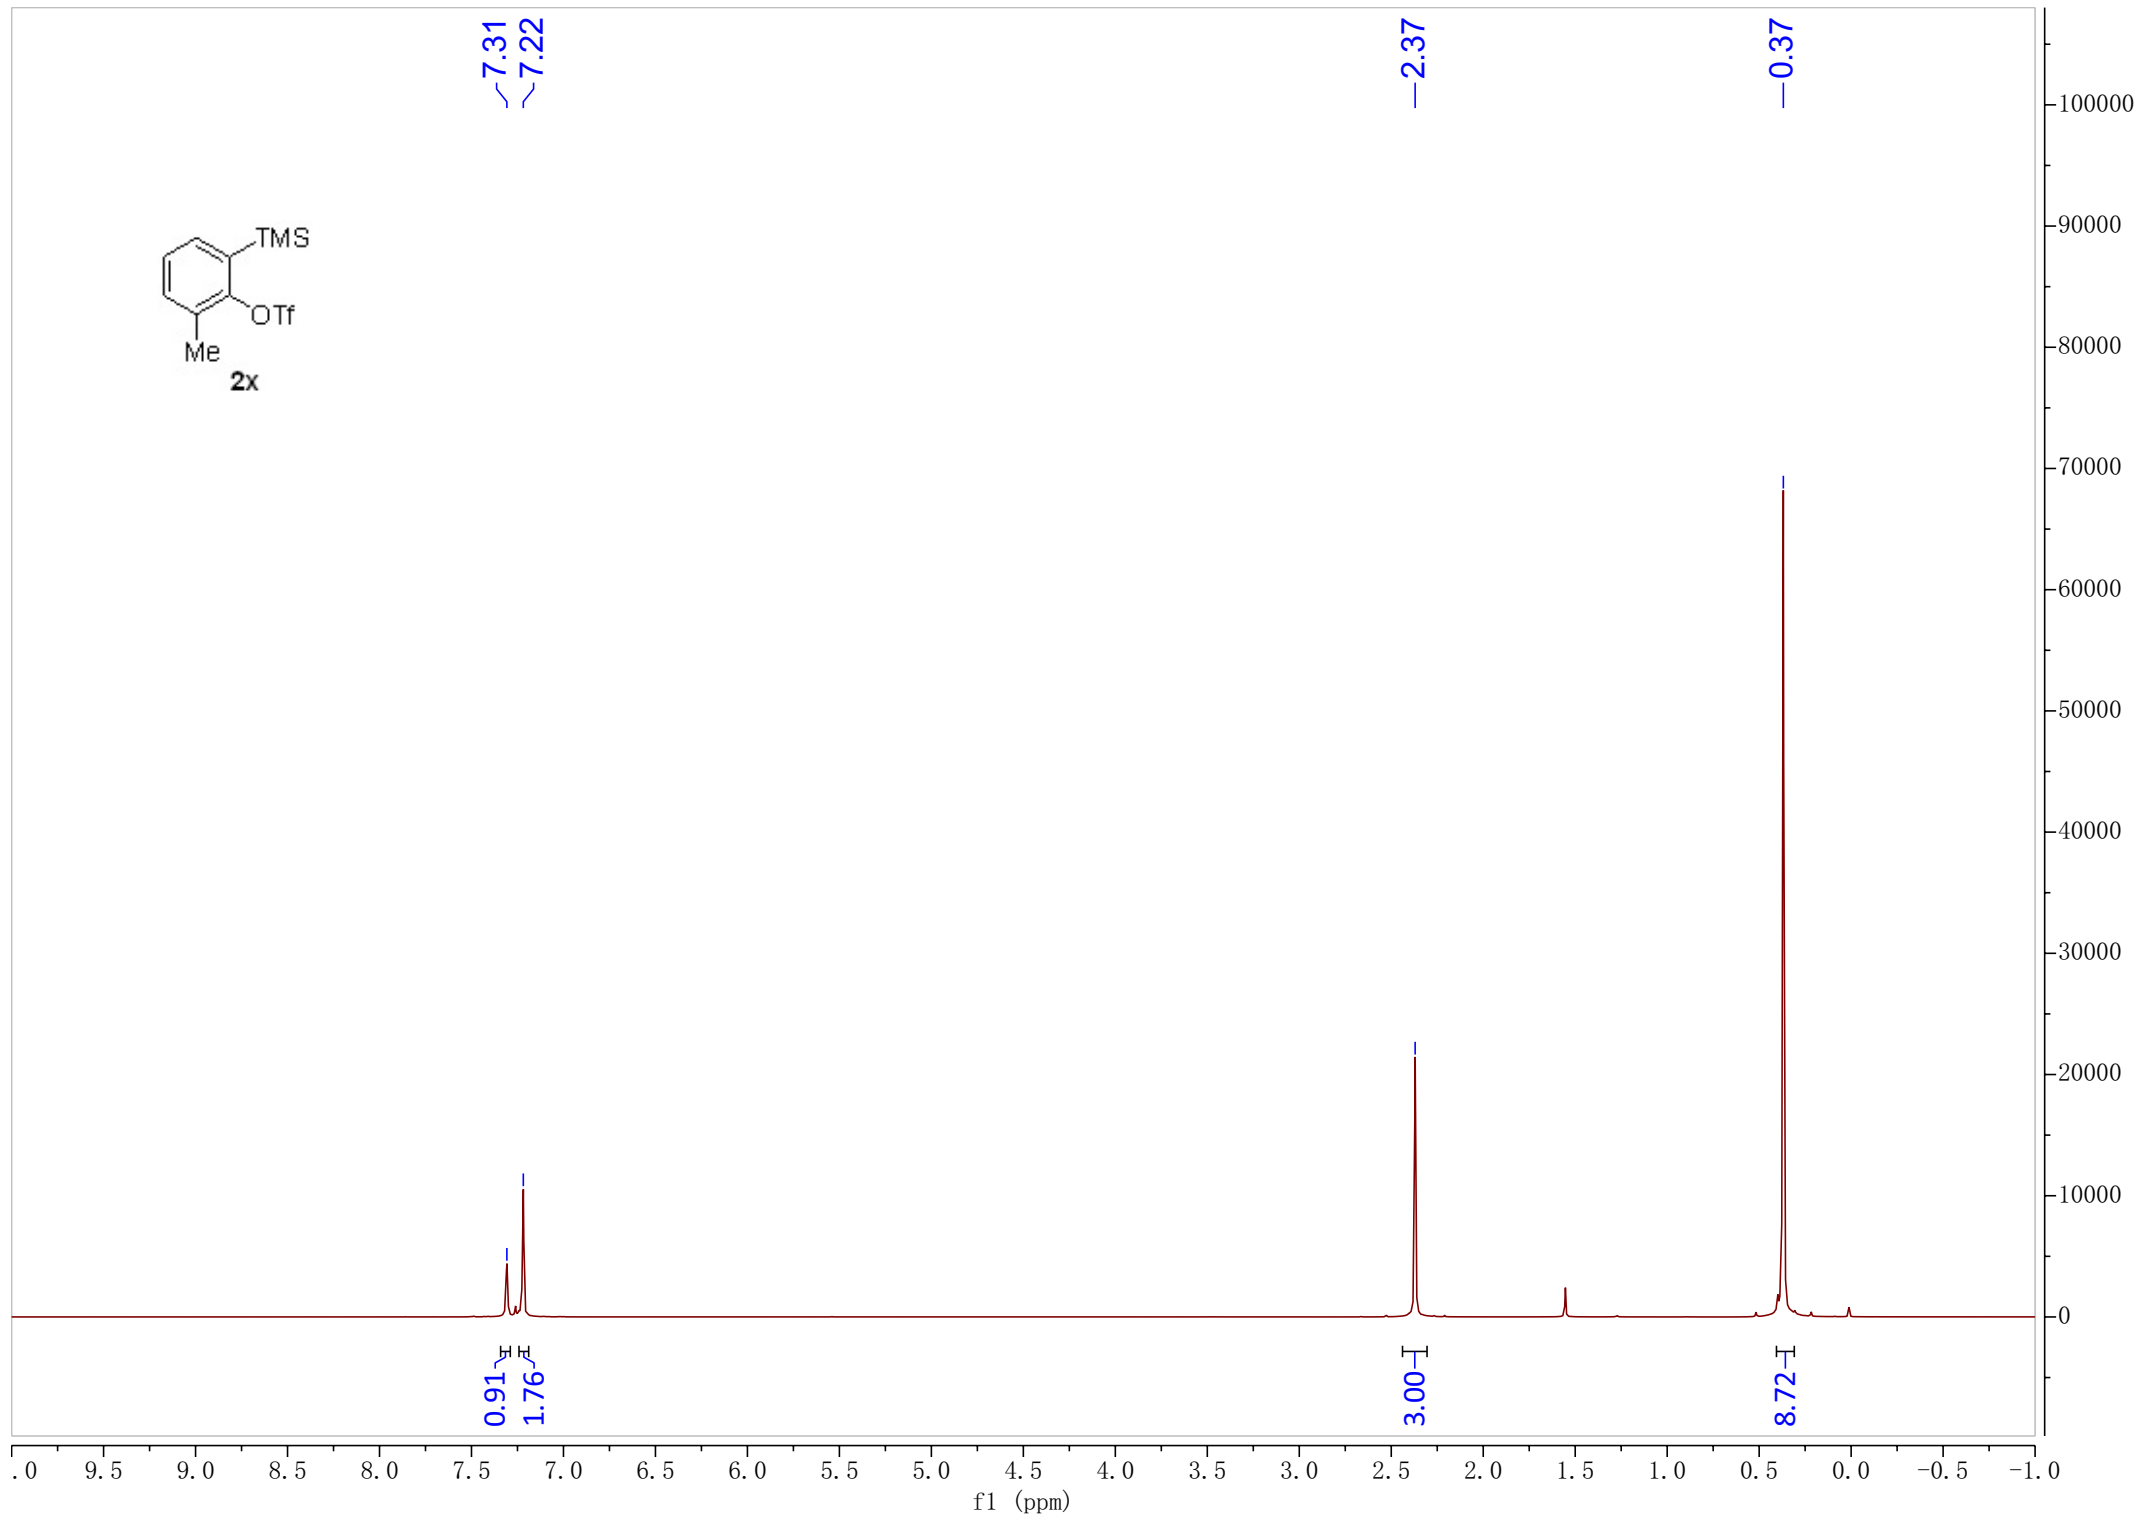

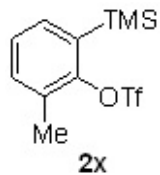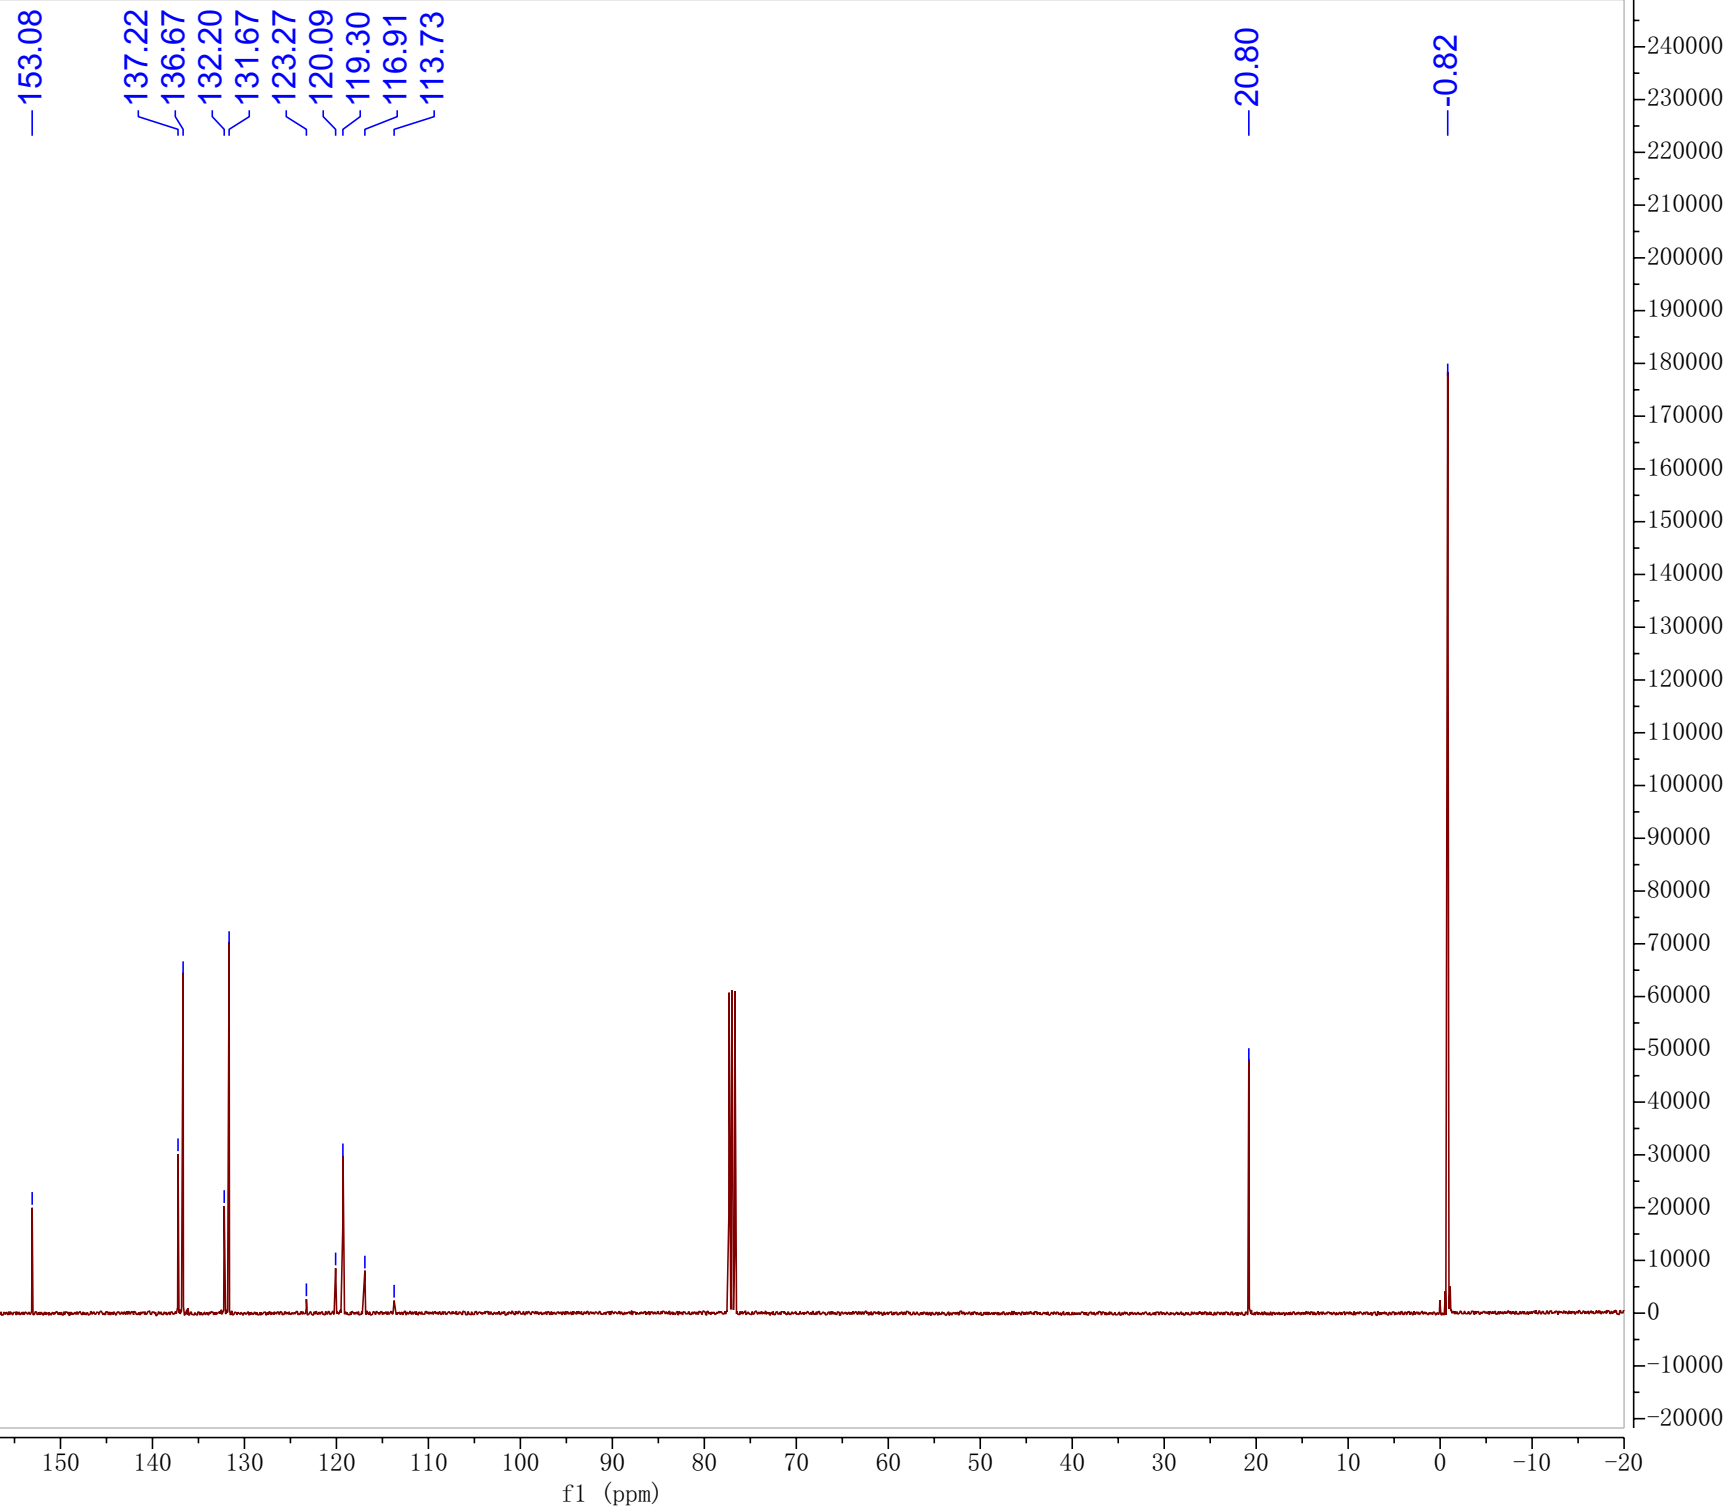

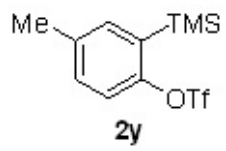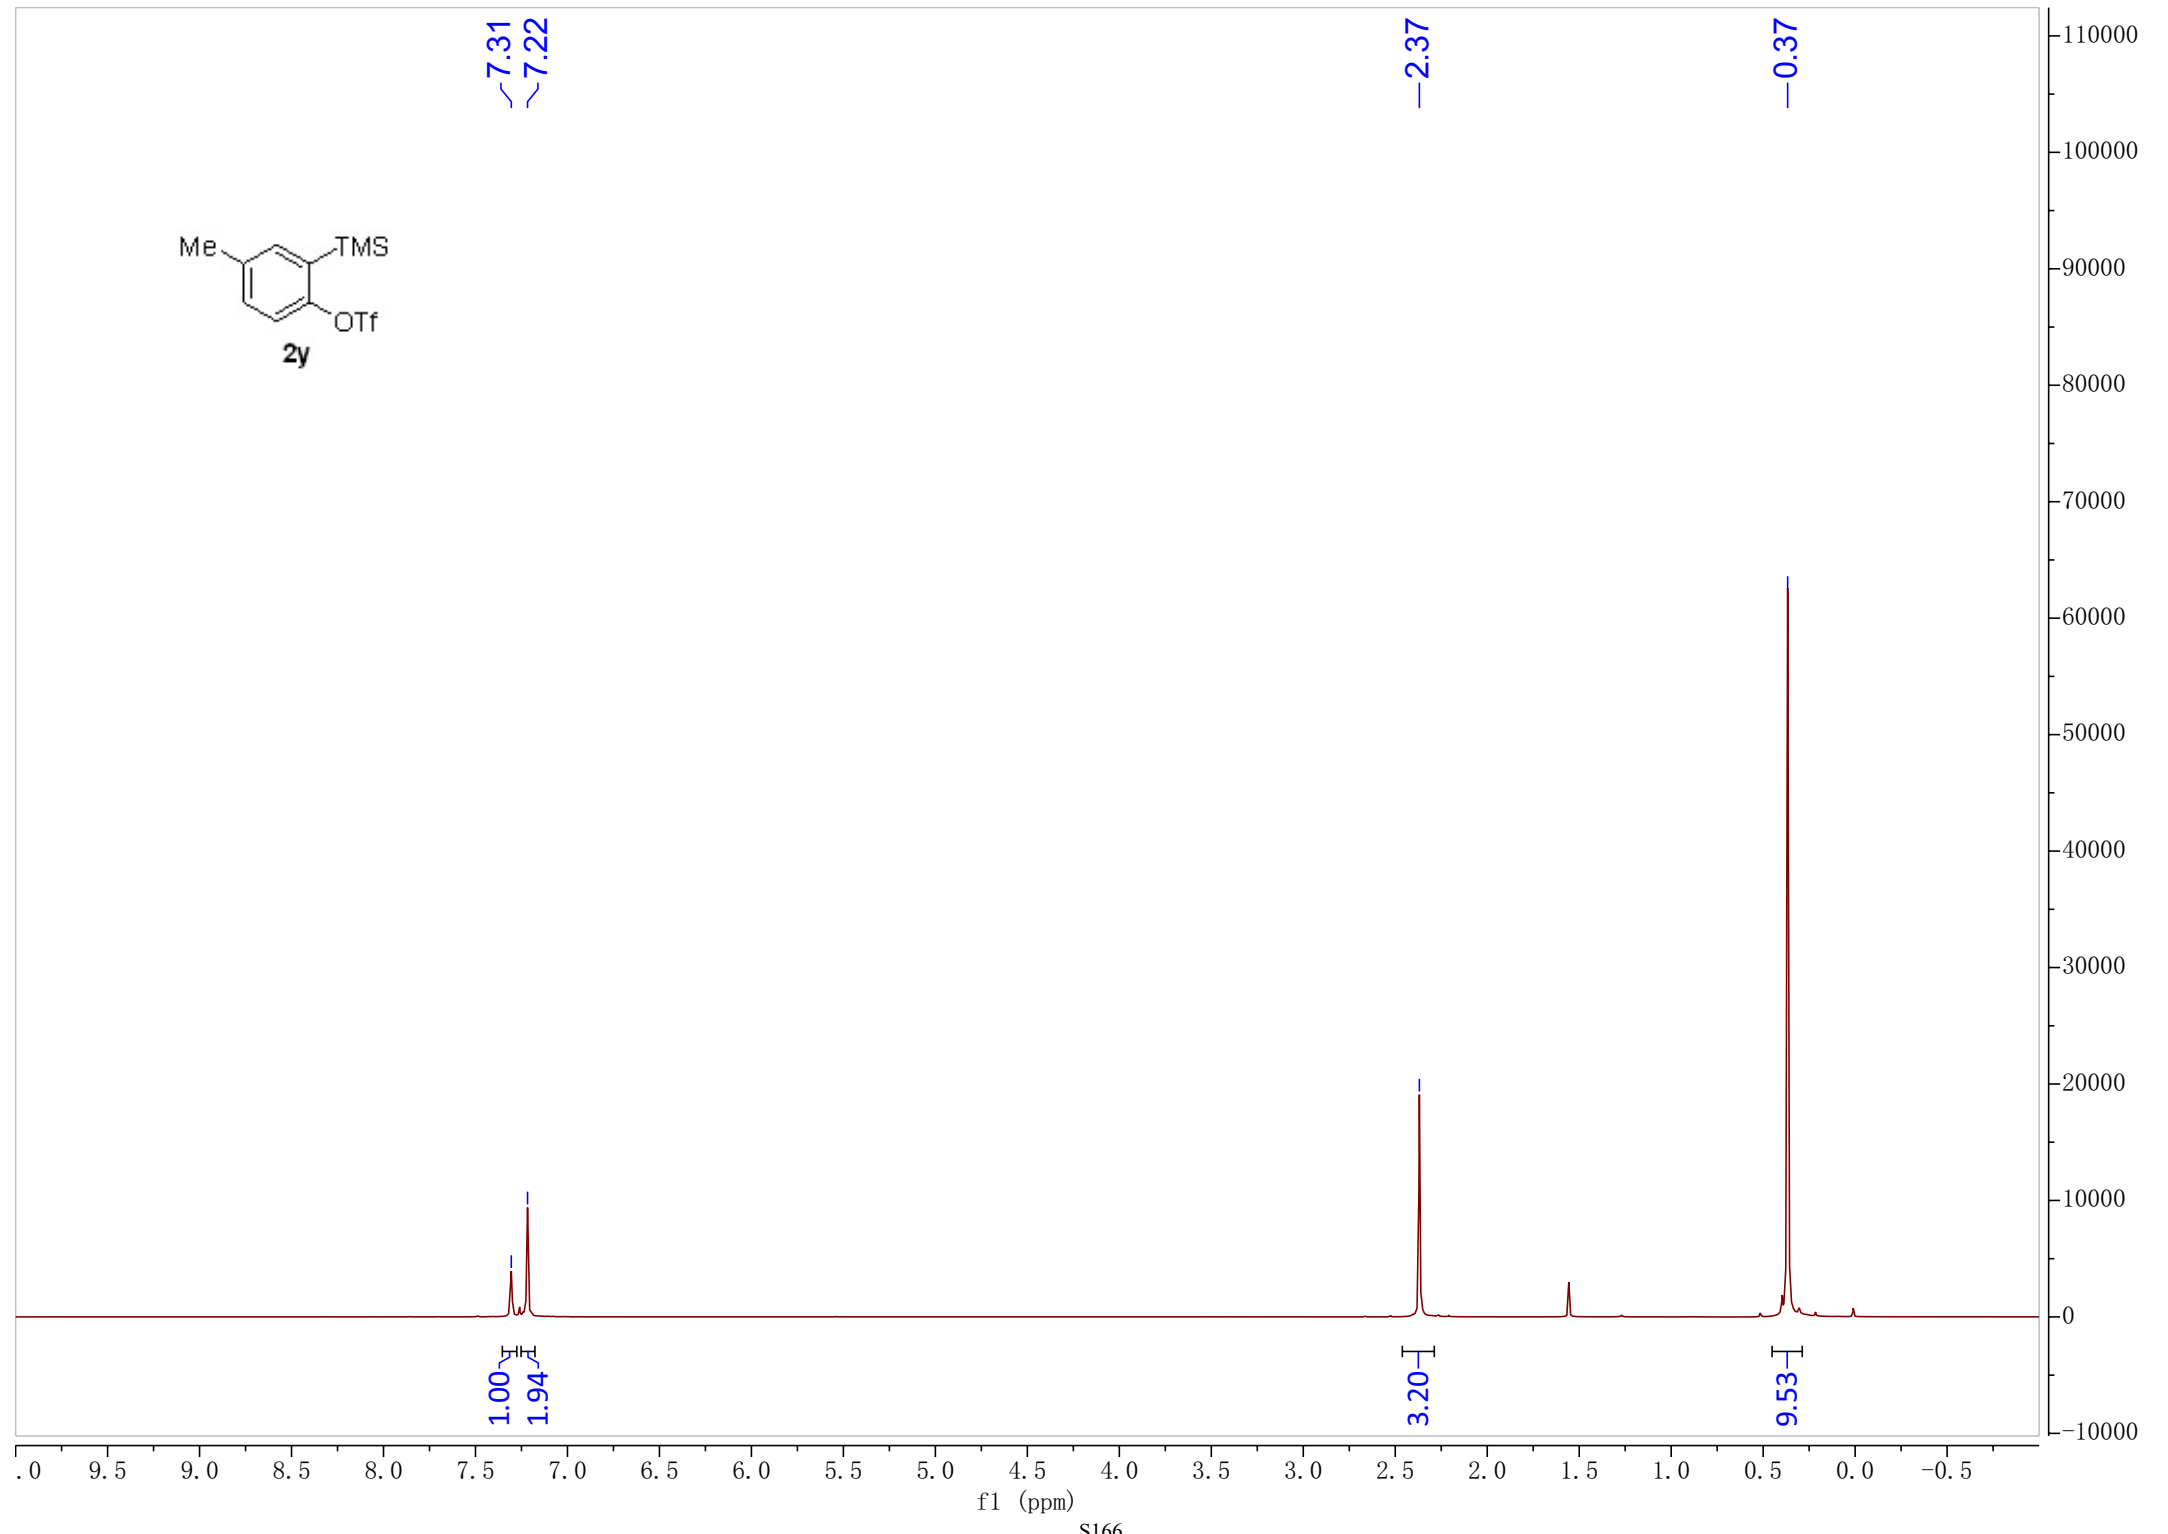

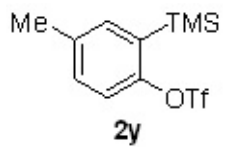

153.08  
137.22  
136.67  
132.20  
131.67  
123.27  
120.08  
119.30  
116.91  
113.73

20.80

-0.82

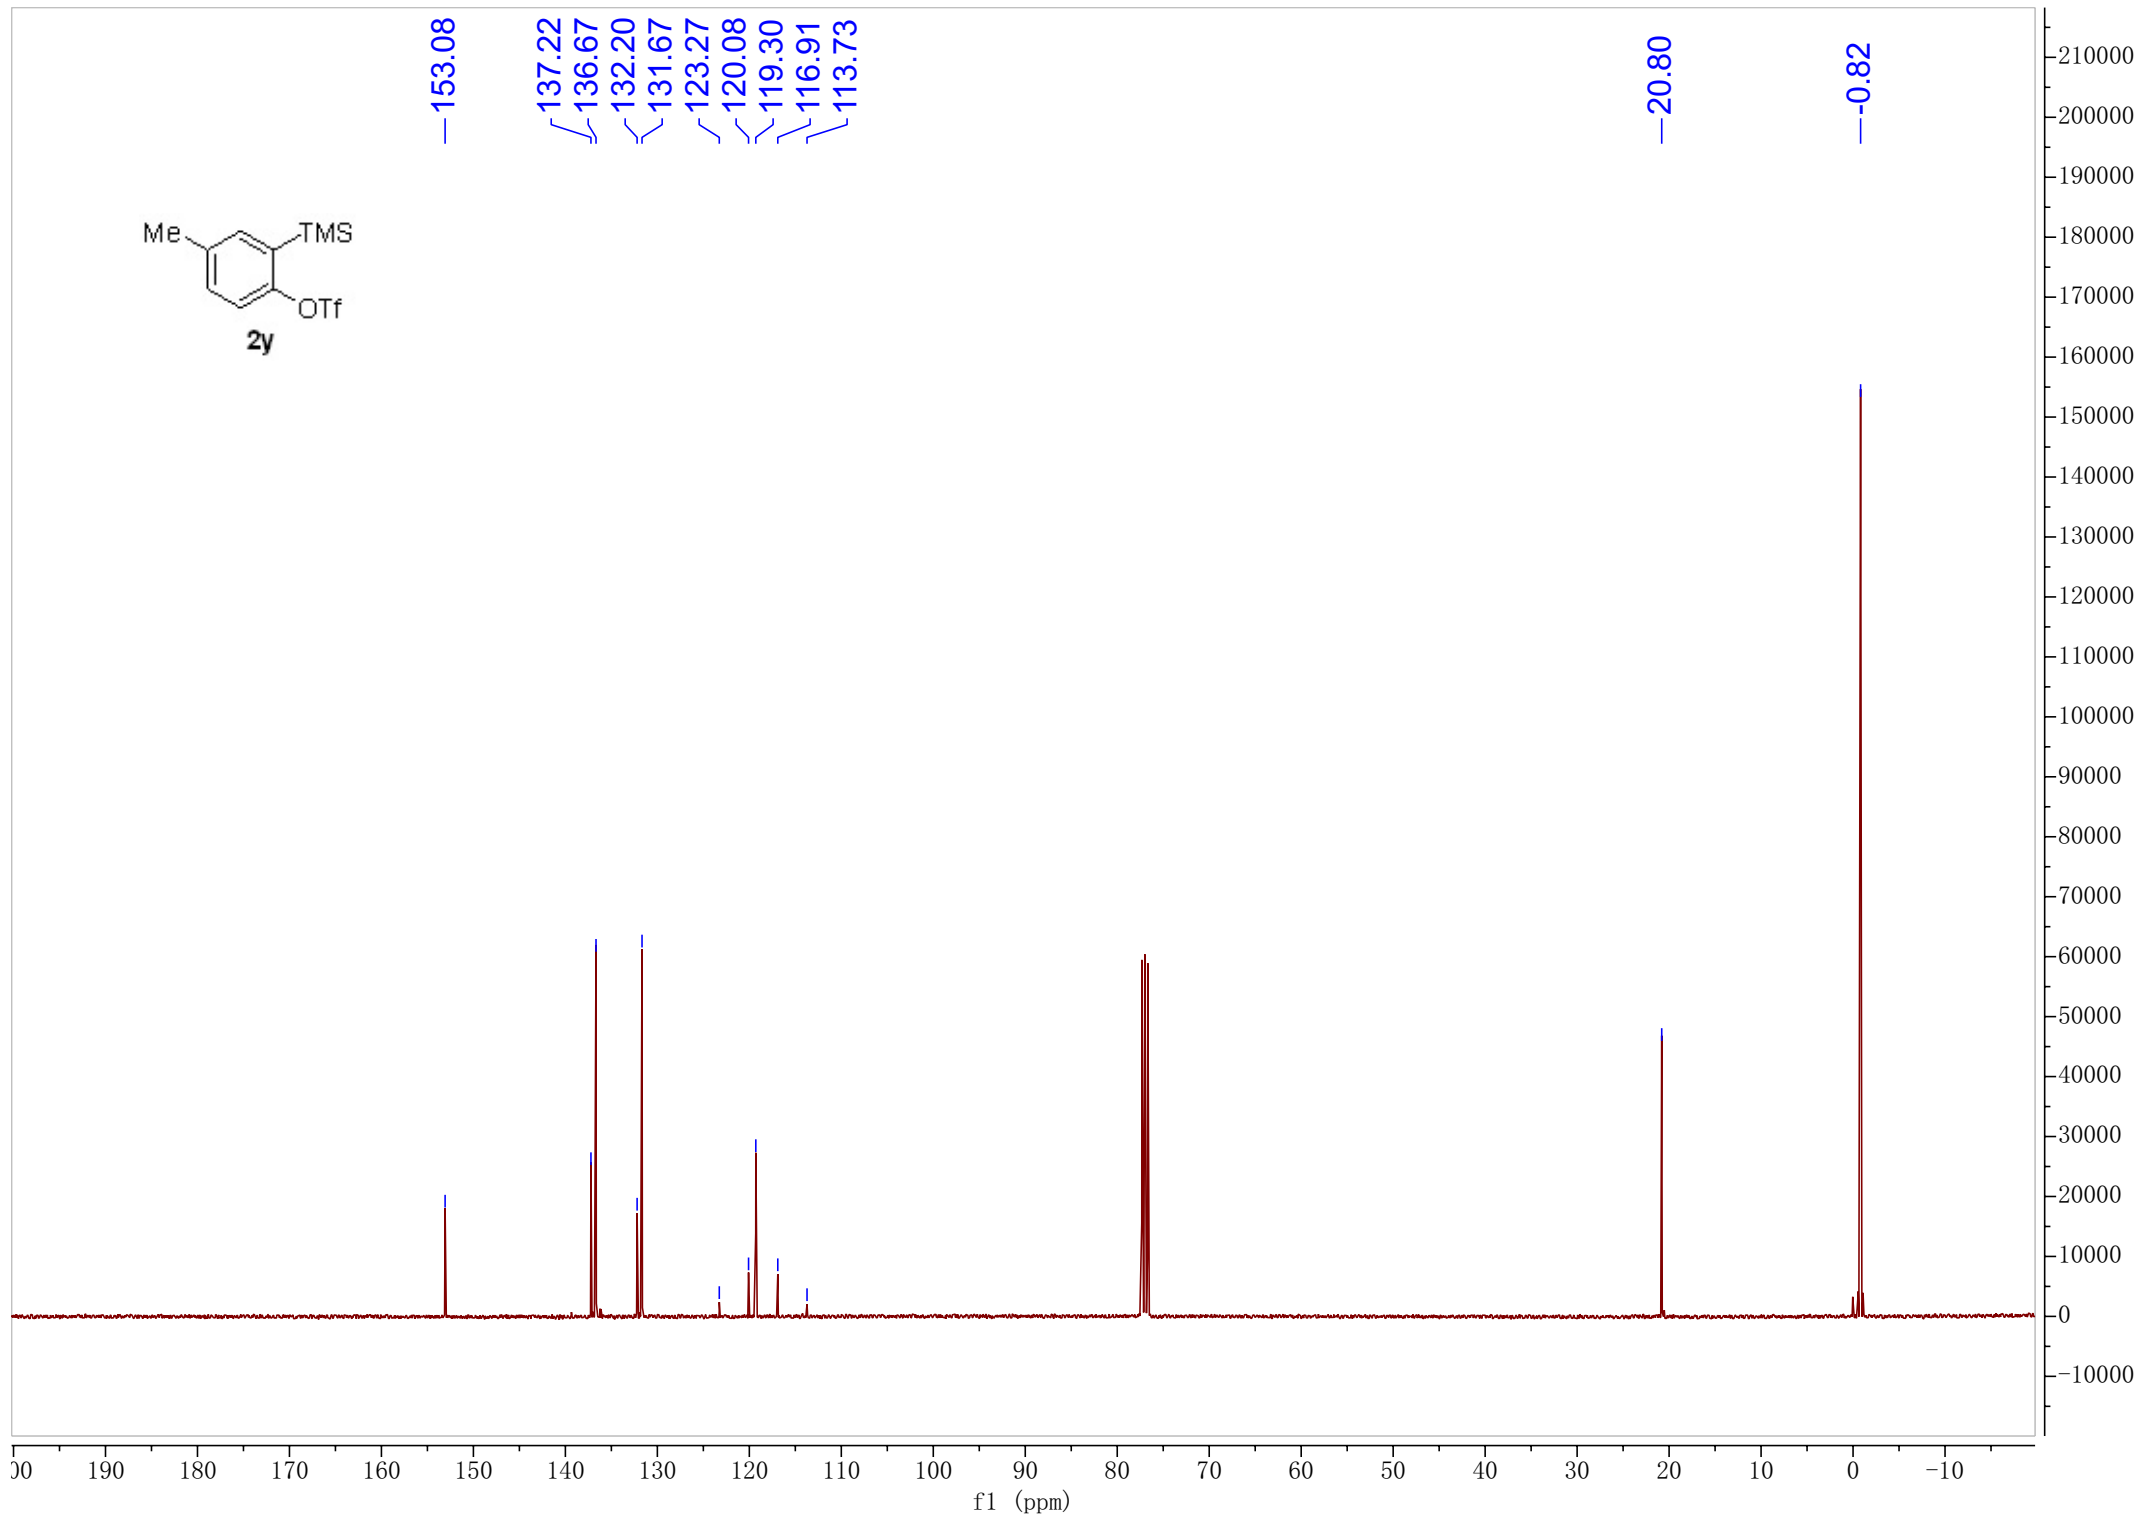

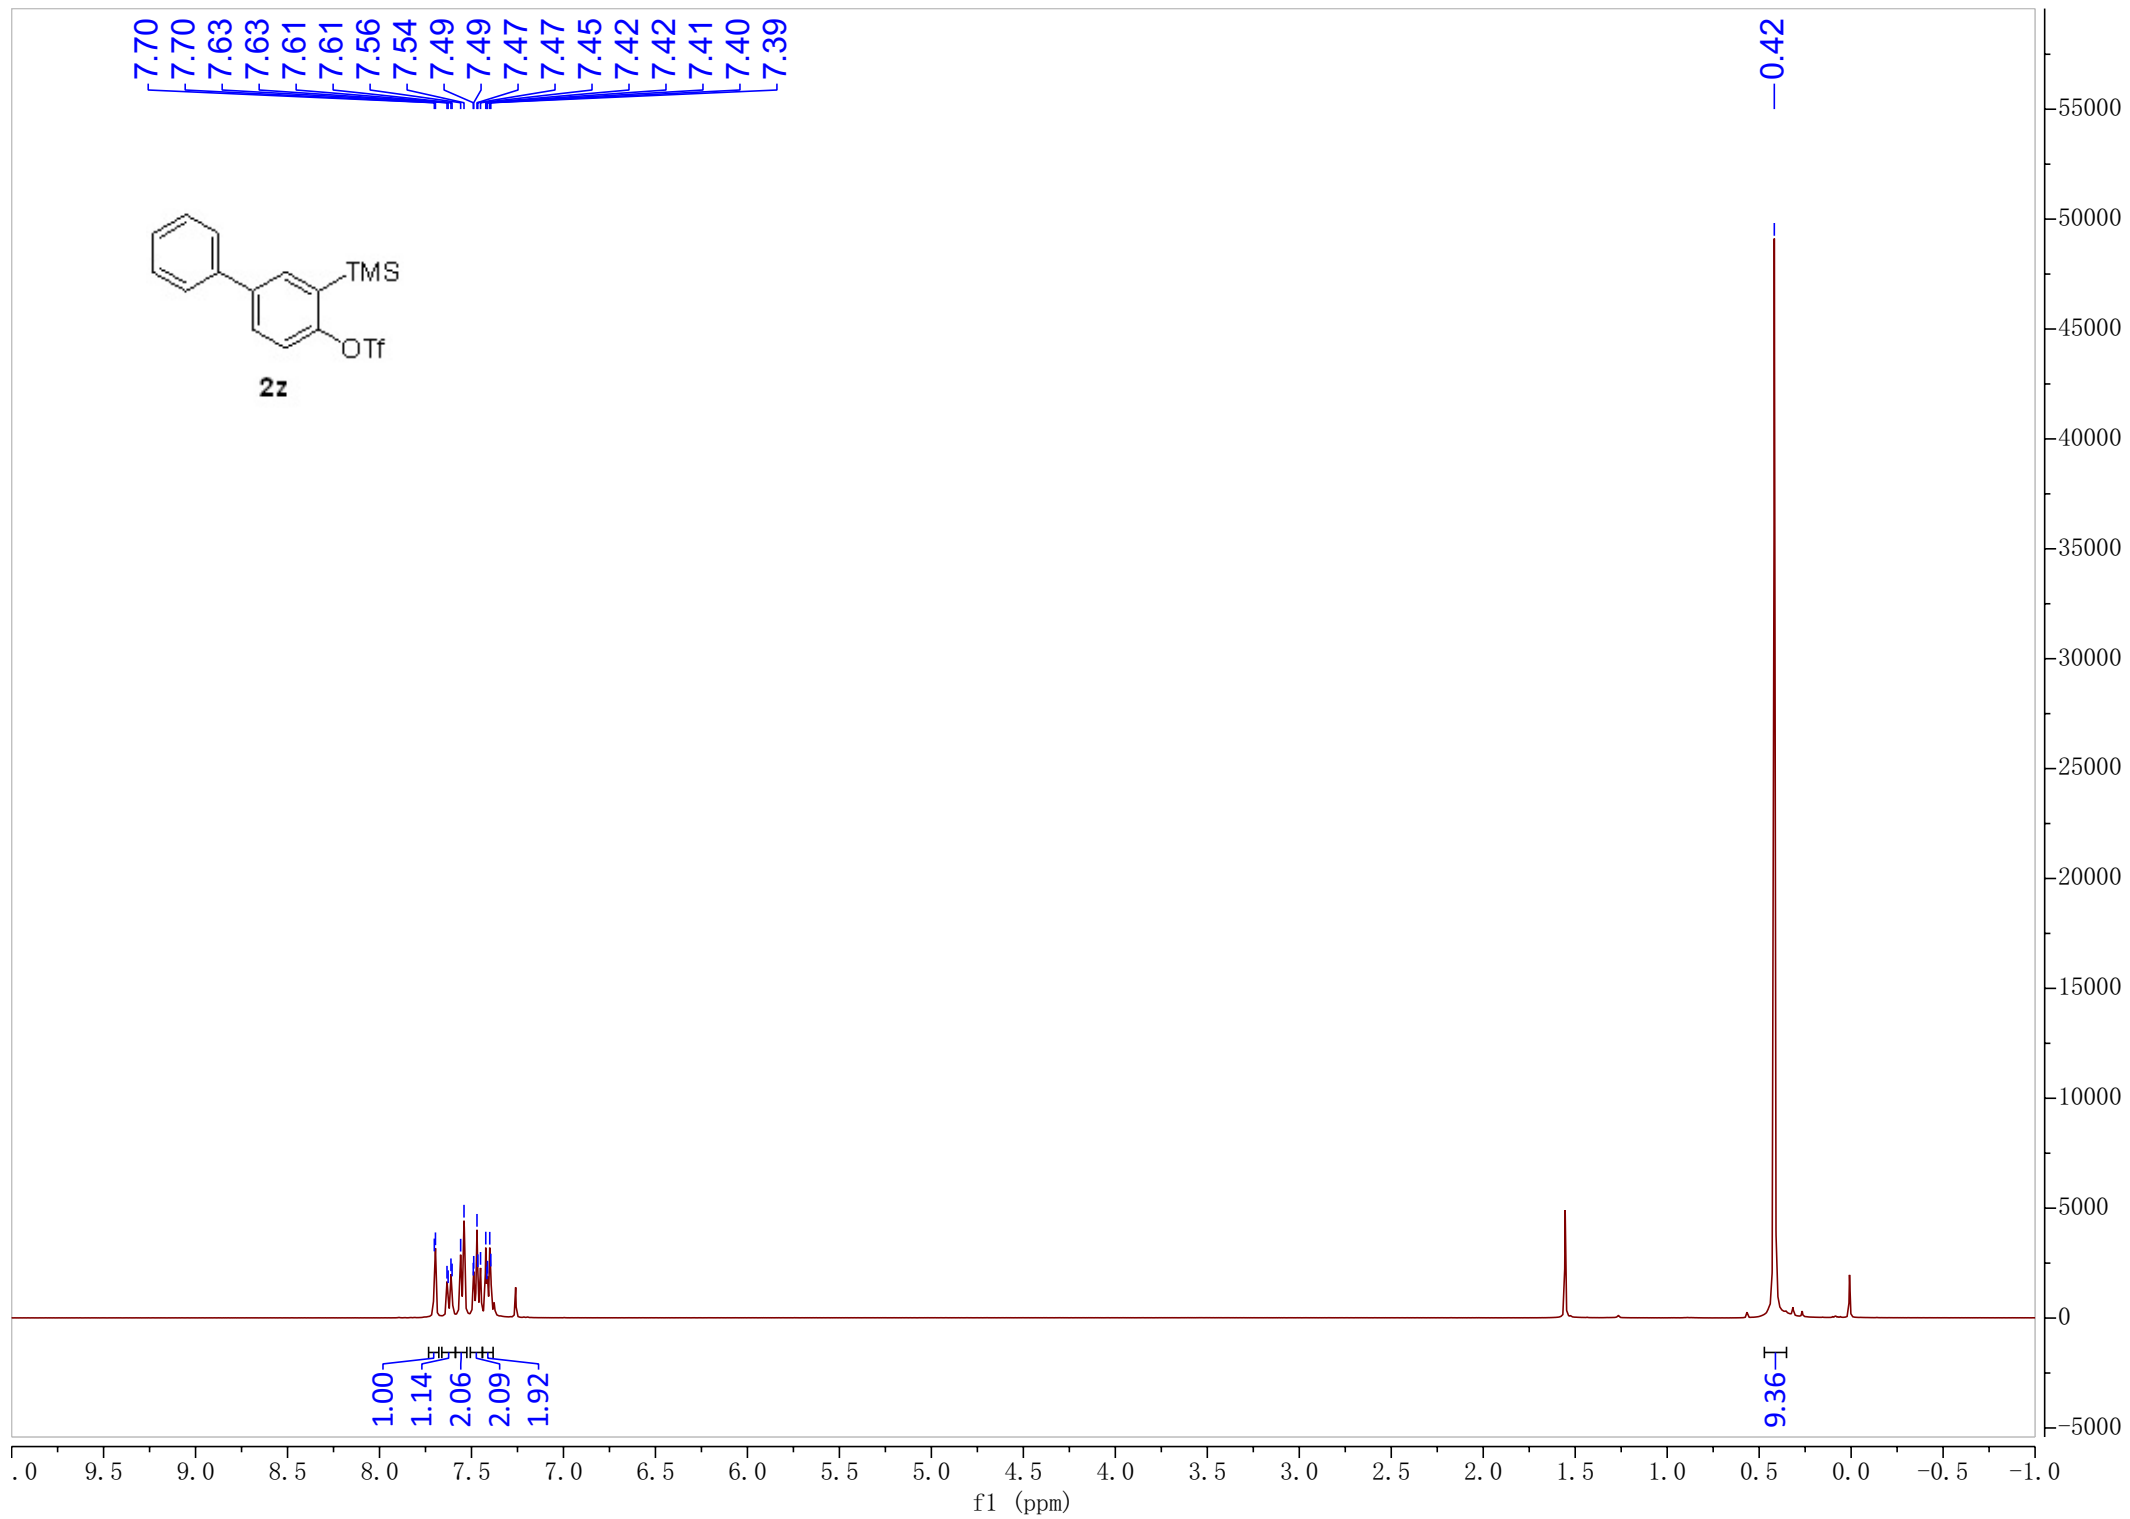



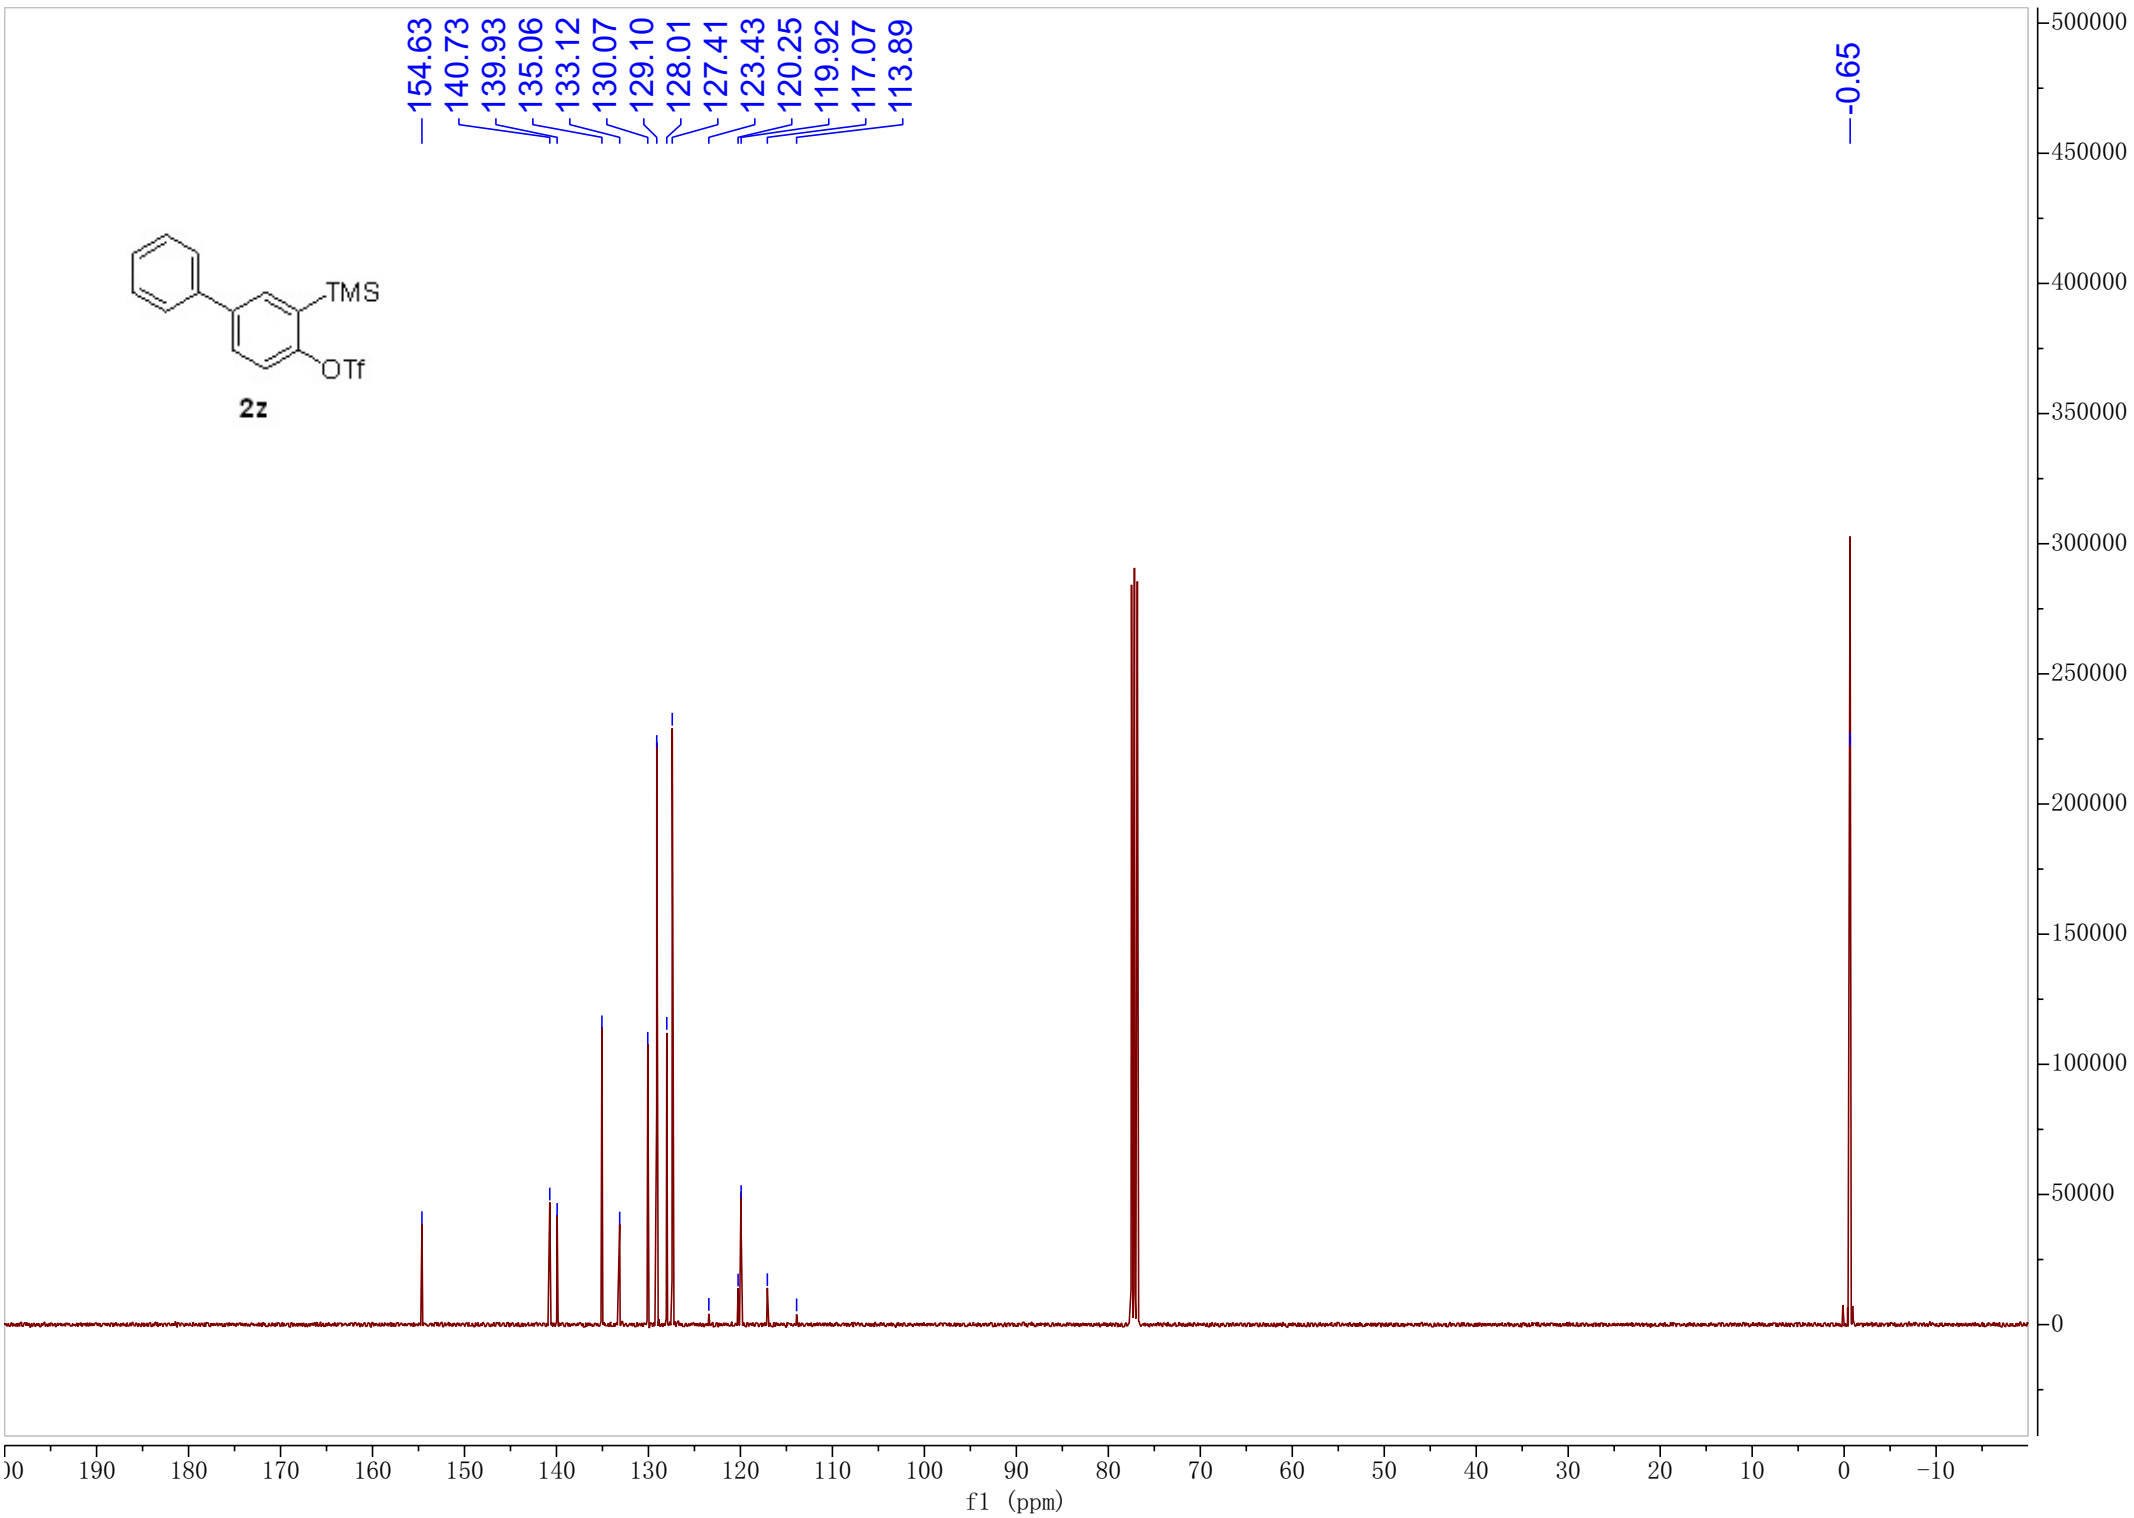

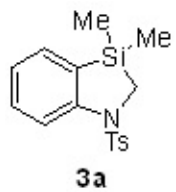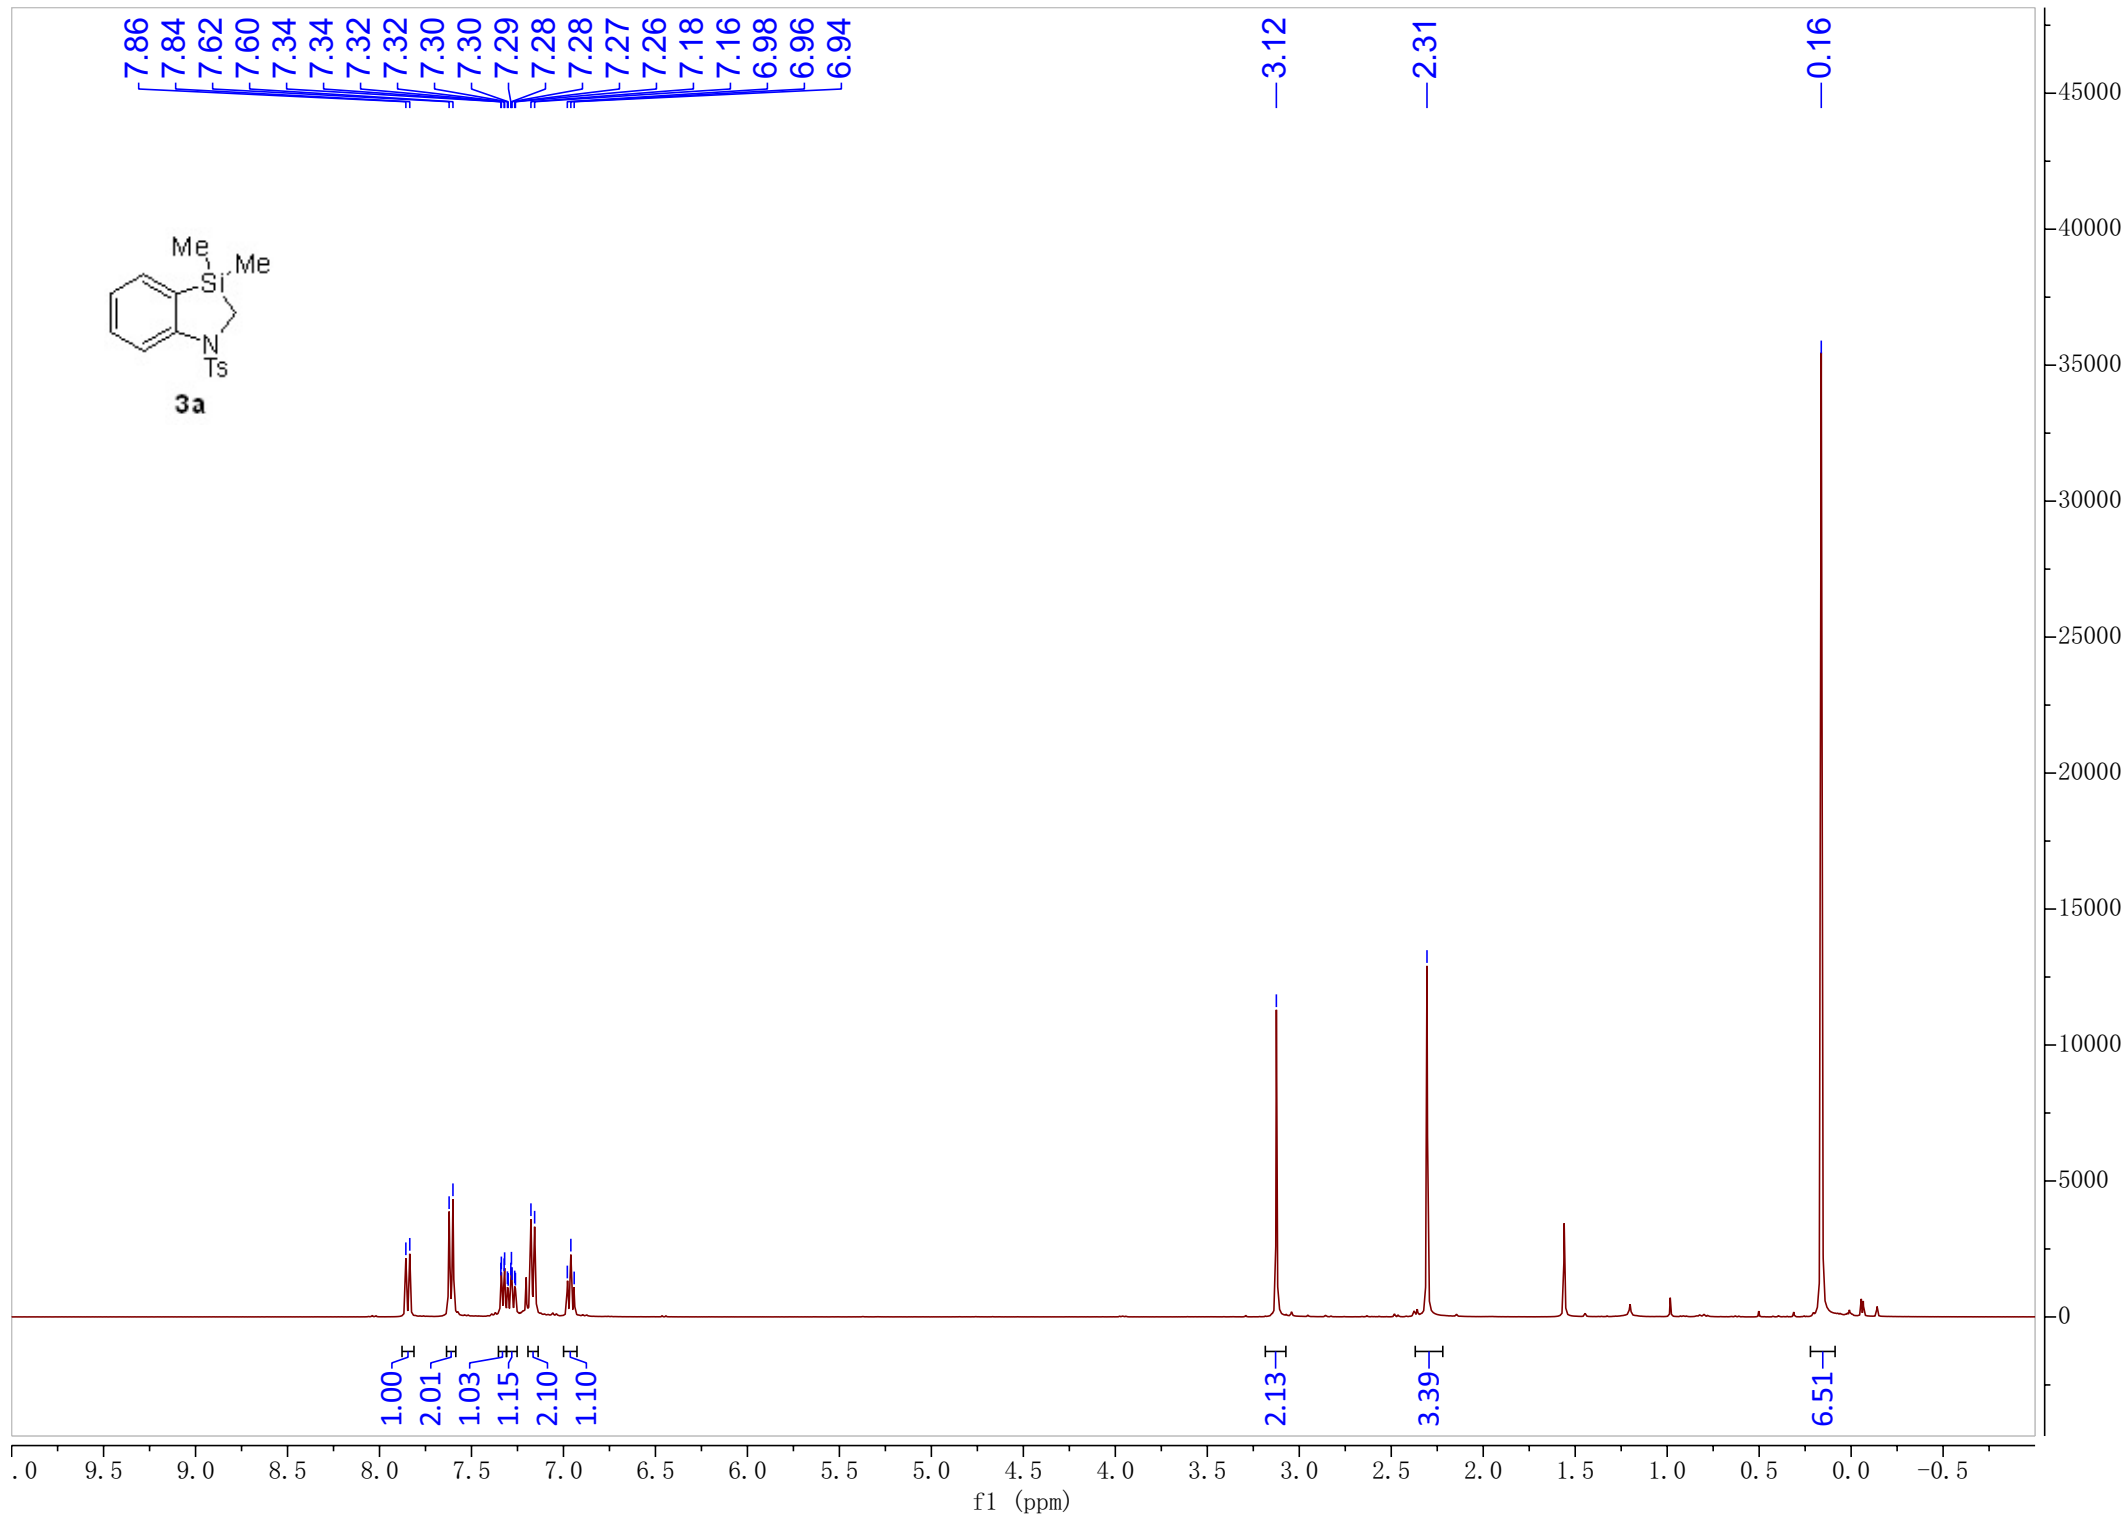

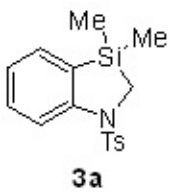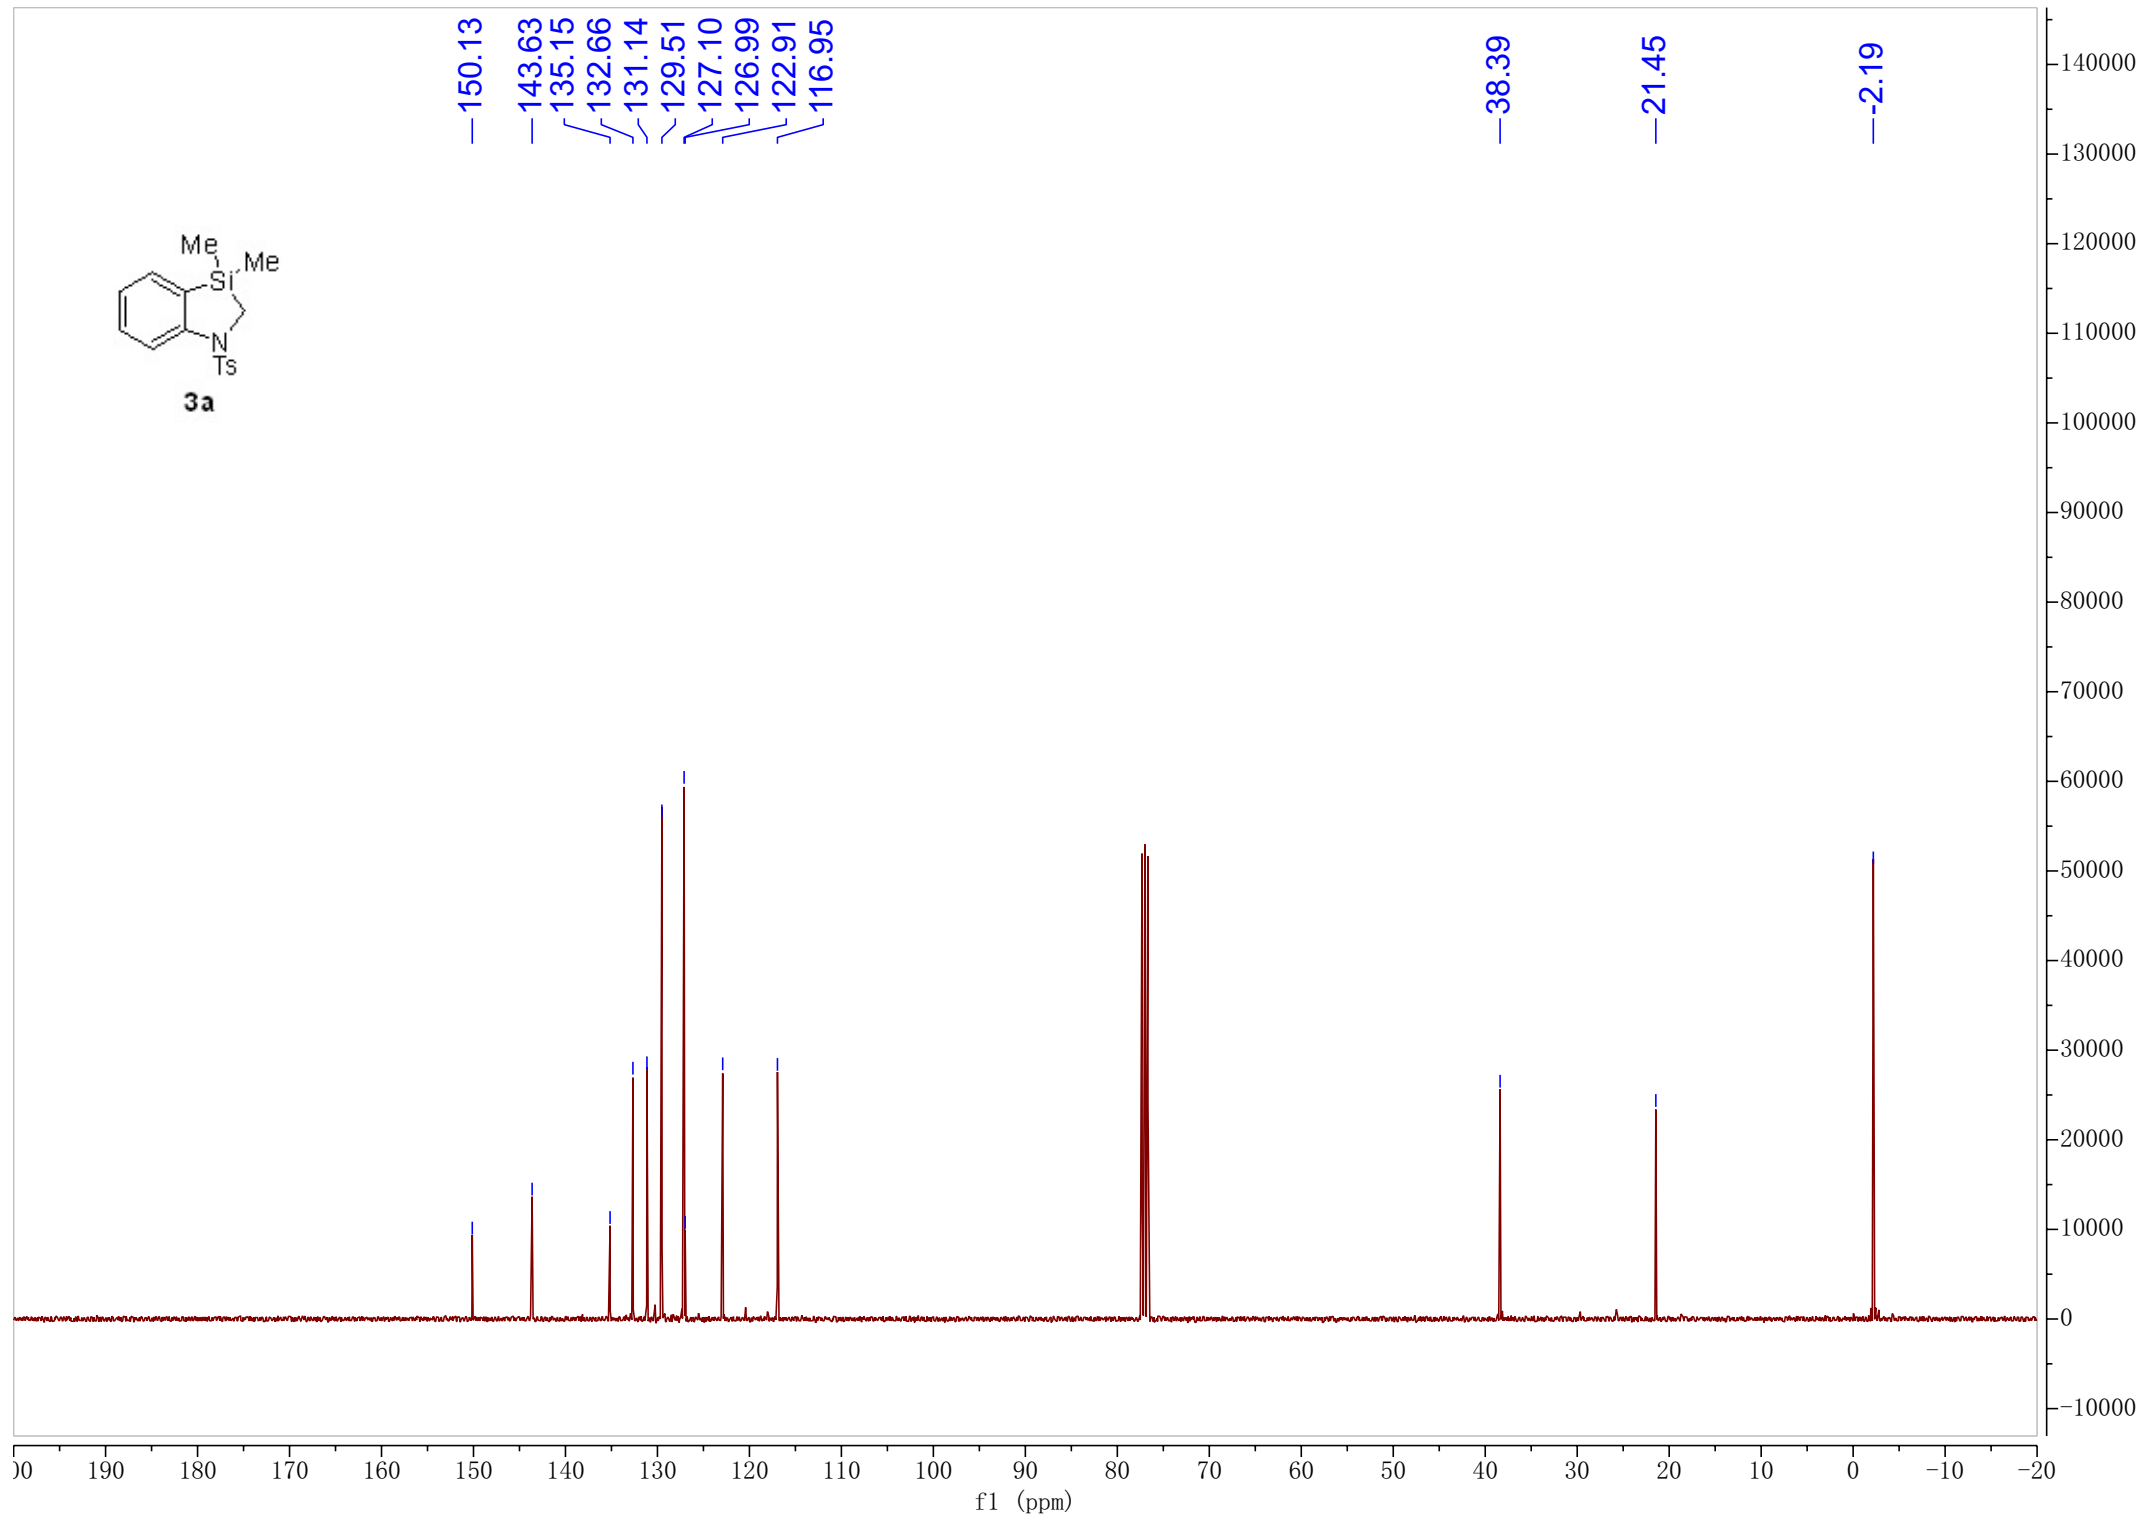

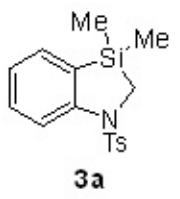

—4.54

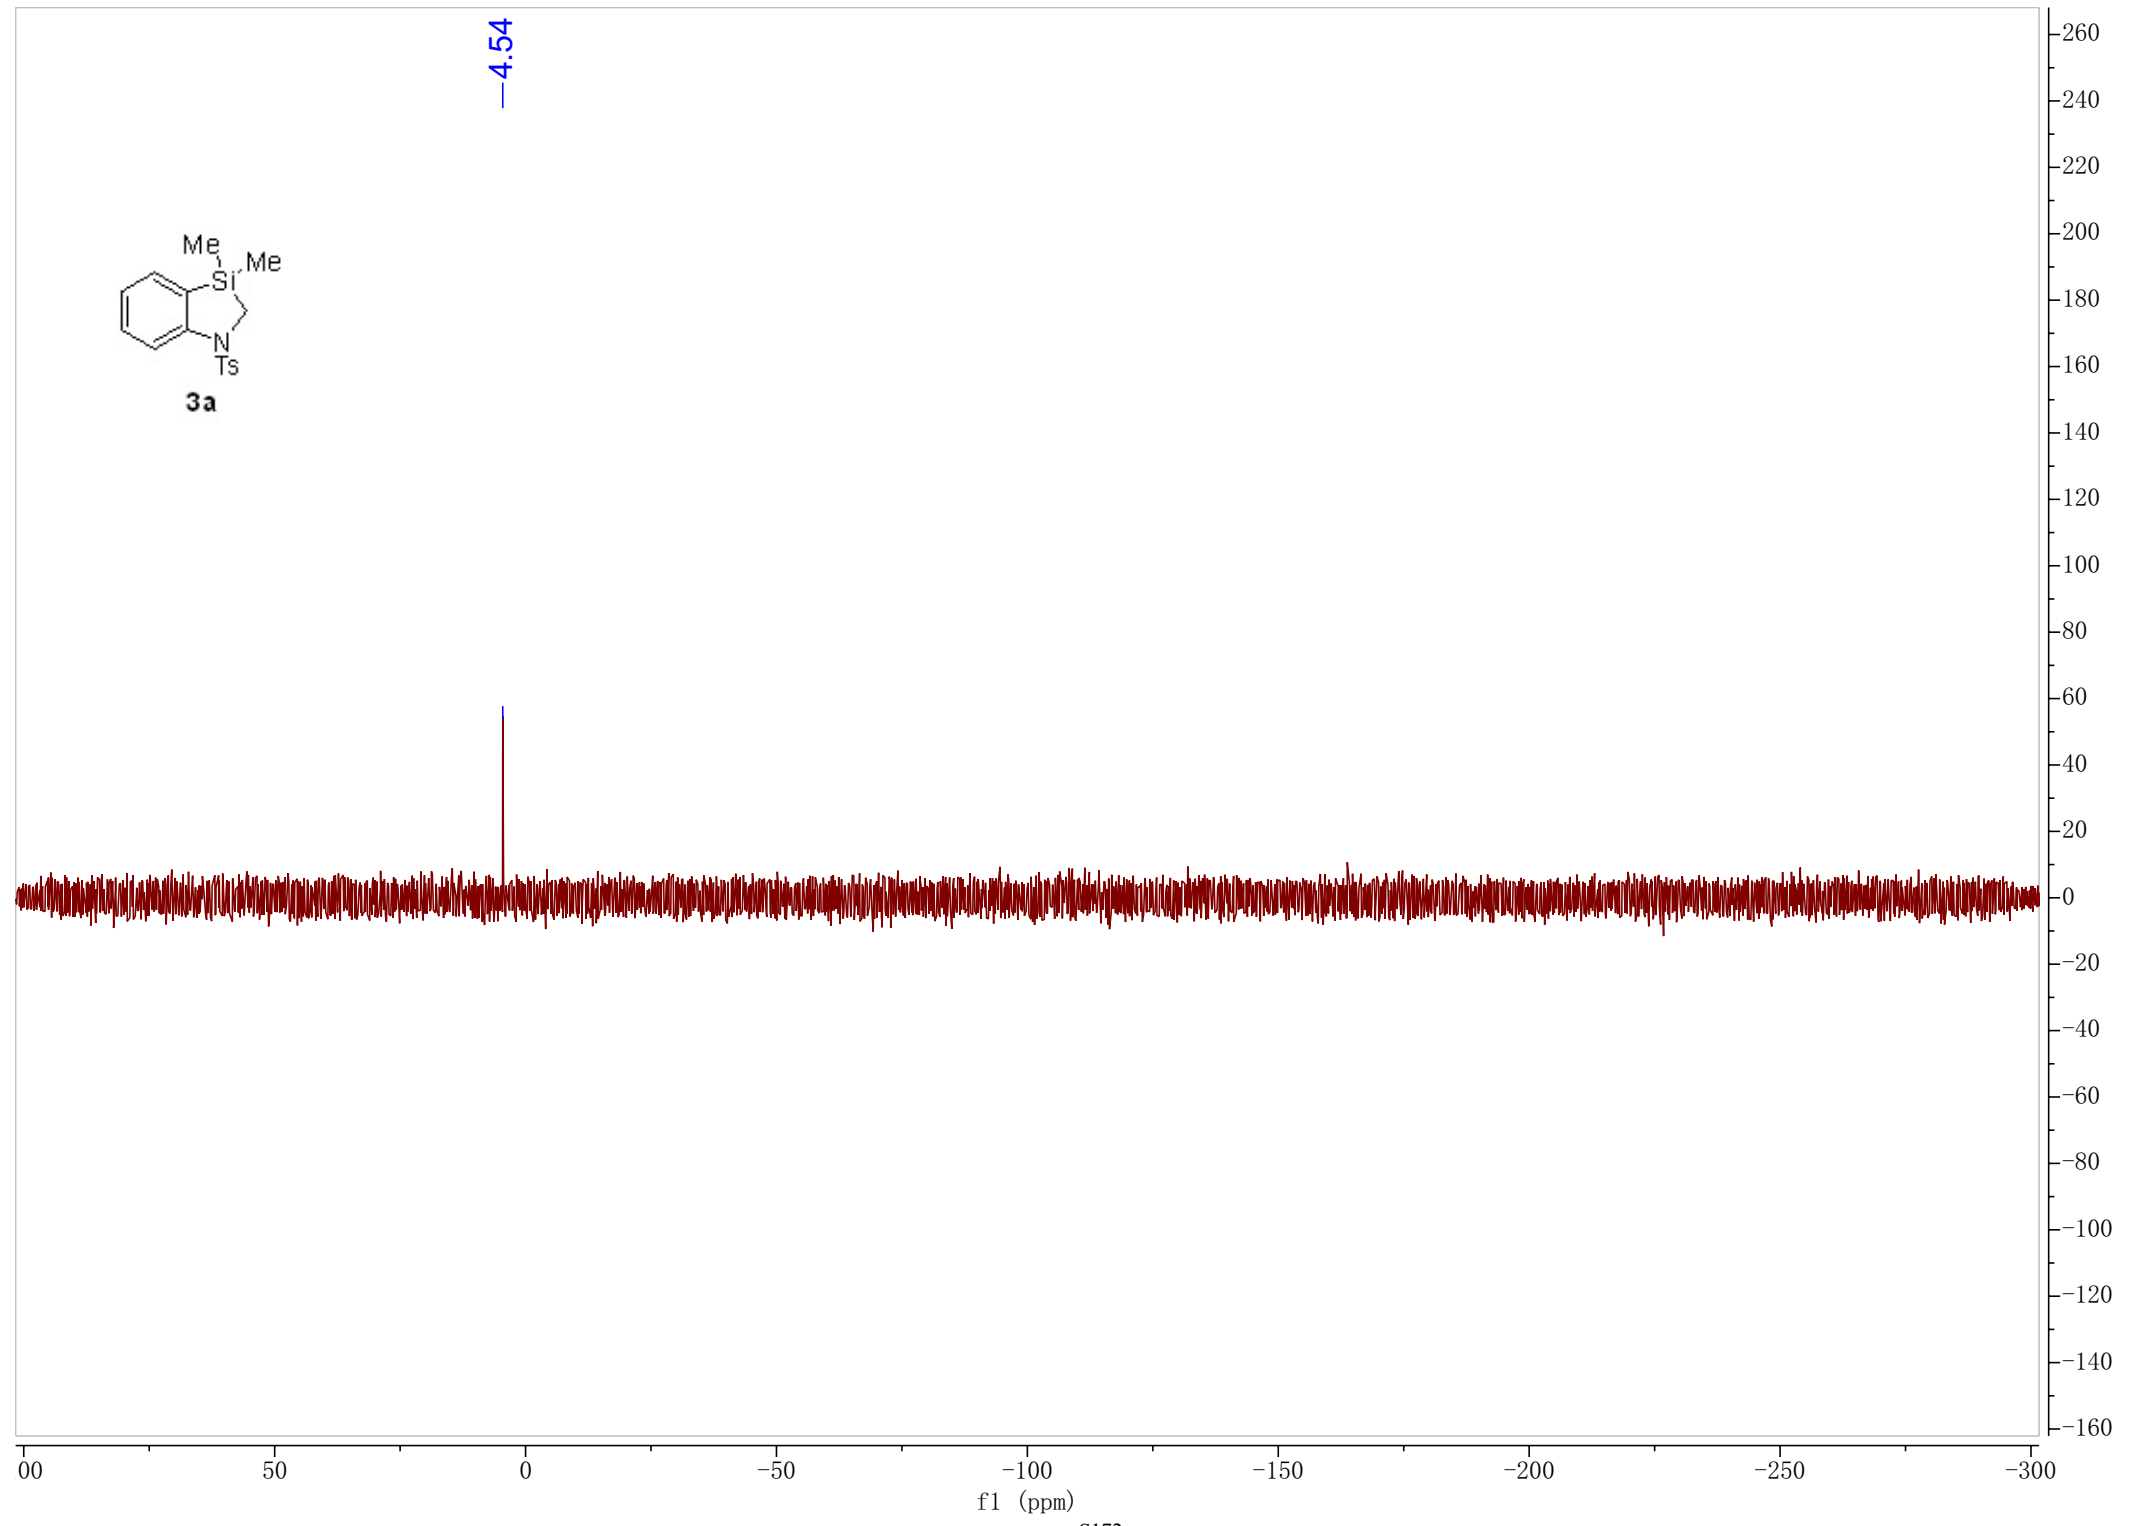

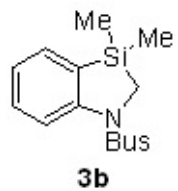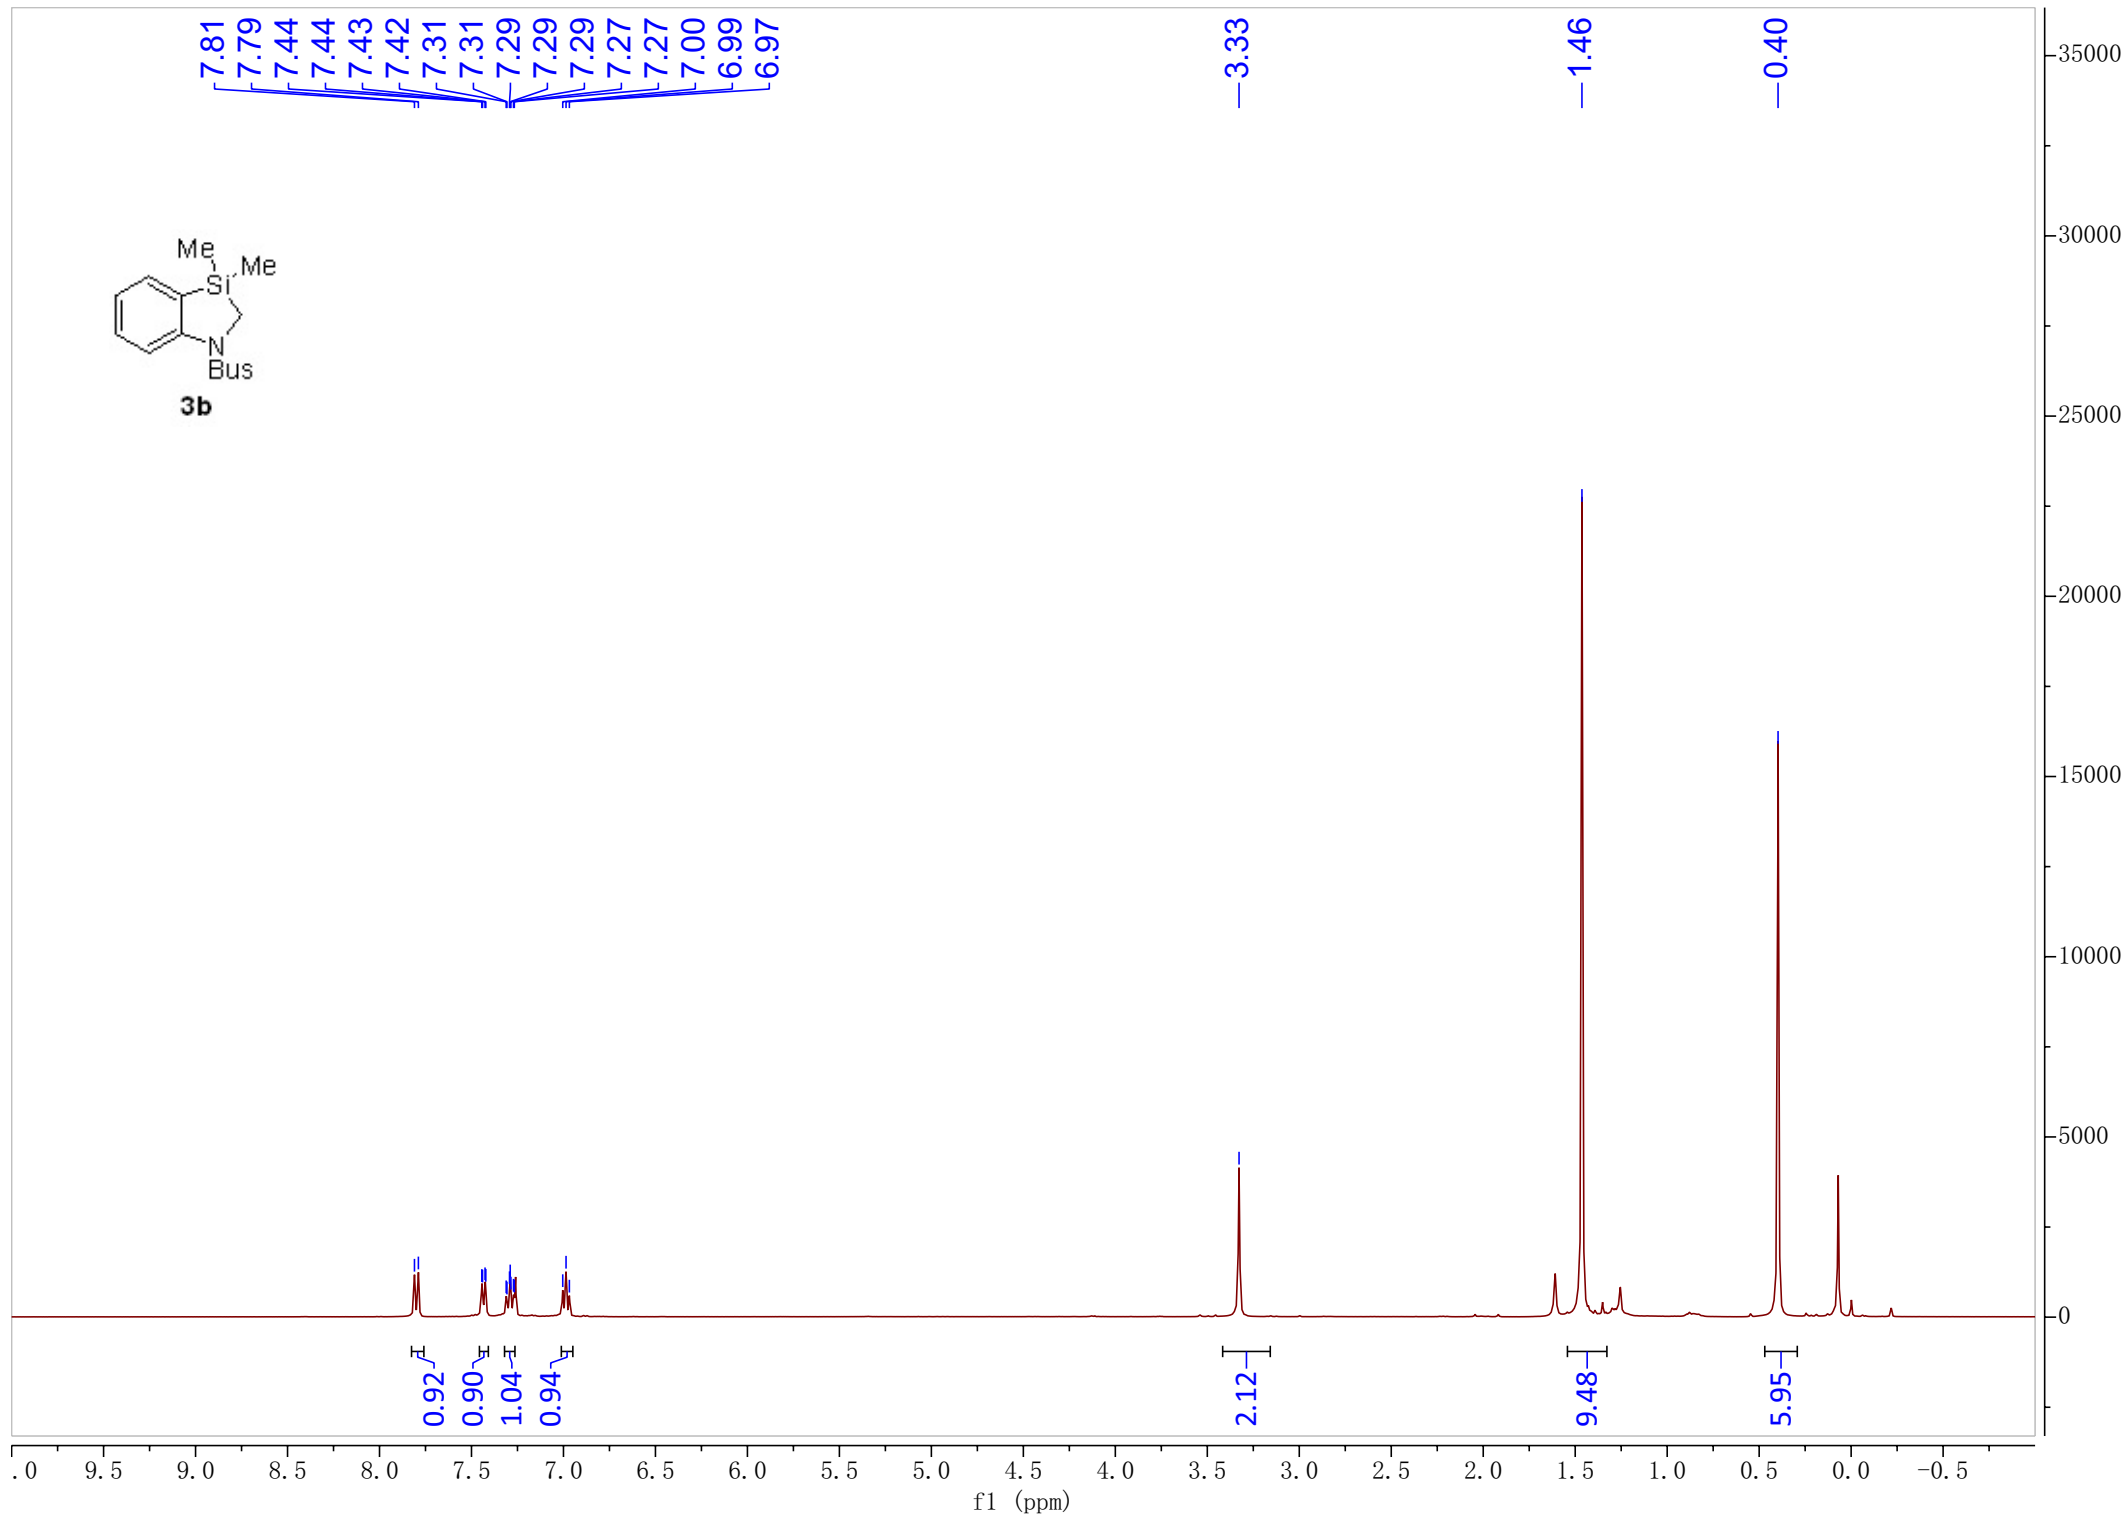

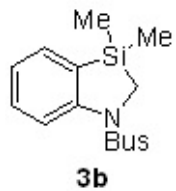

— 151.90  
— 132.57  
— 130.93  
— 125.80  
— 122.08  
— 116.85  
— 64.02  
— 40.84  
— 25.33  
— -1.98

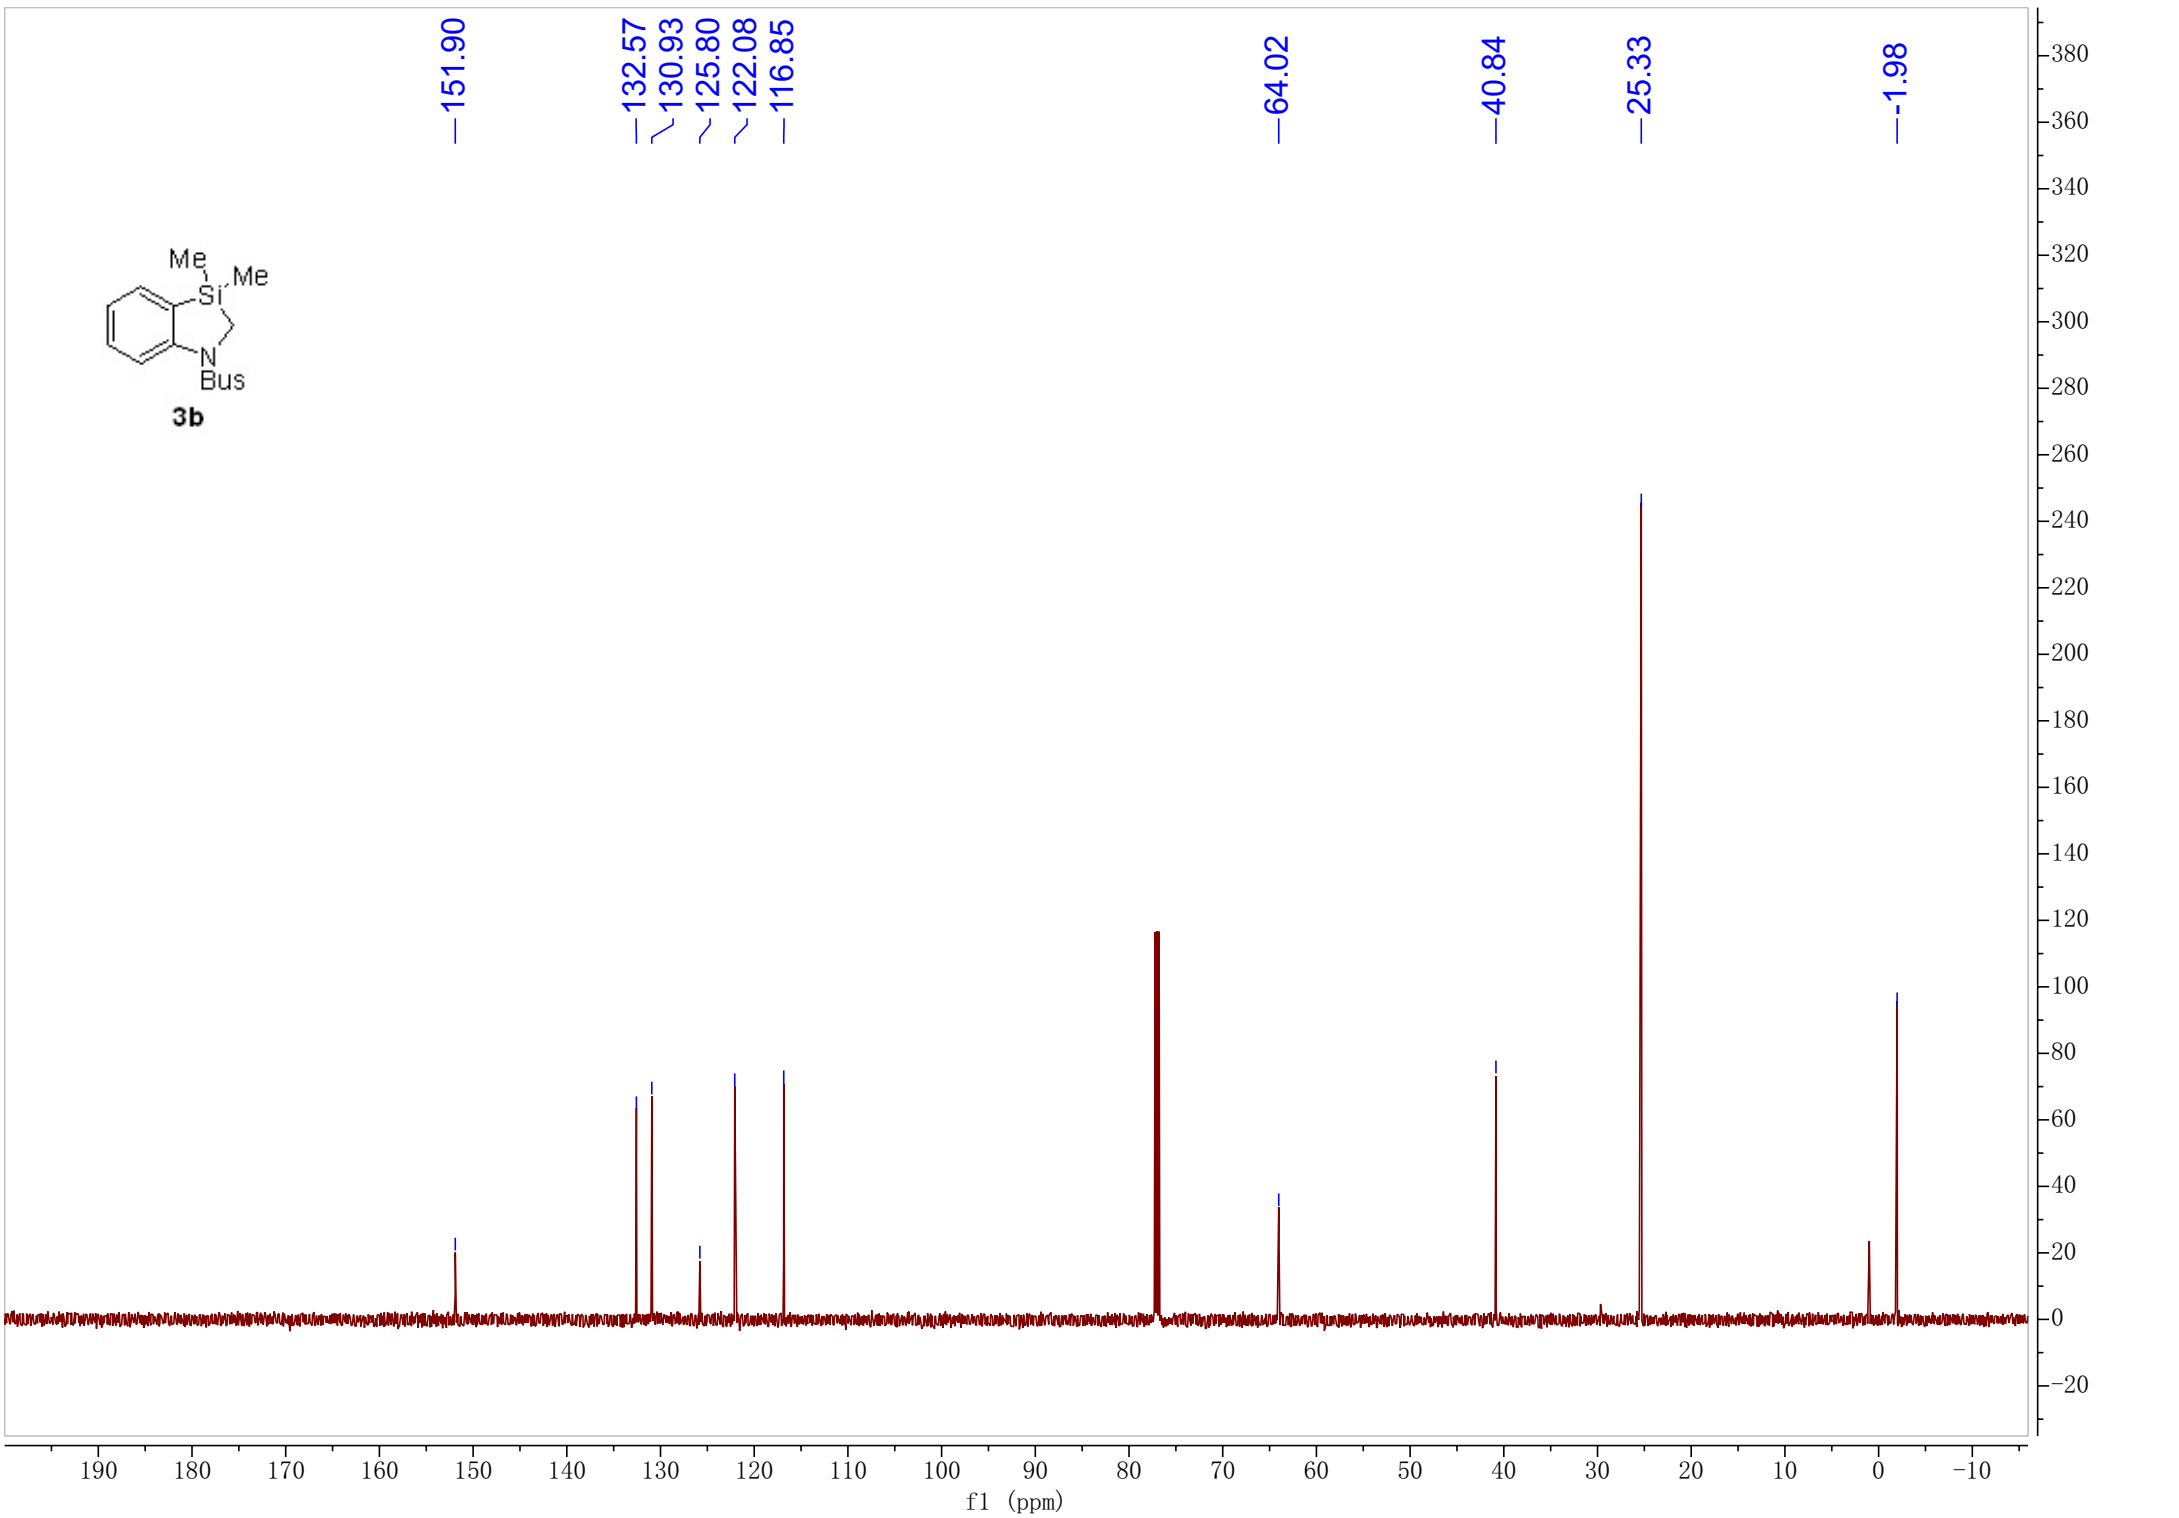

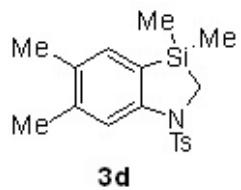

7.75  
7.66  
7.64  
7.23  
7.21  
7.14

3.14  
2.36  
2.28  
2.20

0.18

1.01  
2.29

2.34  
1.03

1.96

3.22  
2.97  
3.27

6.00

f1 (ppm)

S175

70000  
65000  
60000  
55000  
50000  
45000  
40000  
35000  
30000  
25000  
20000  
15000  
10000  
5000  
0  
-5000

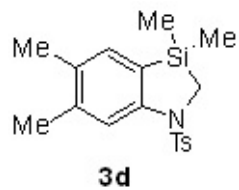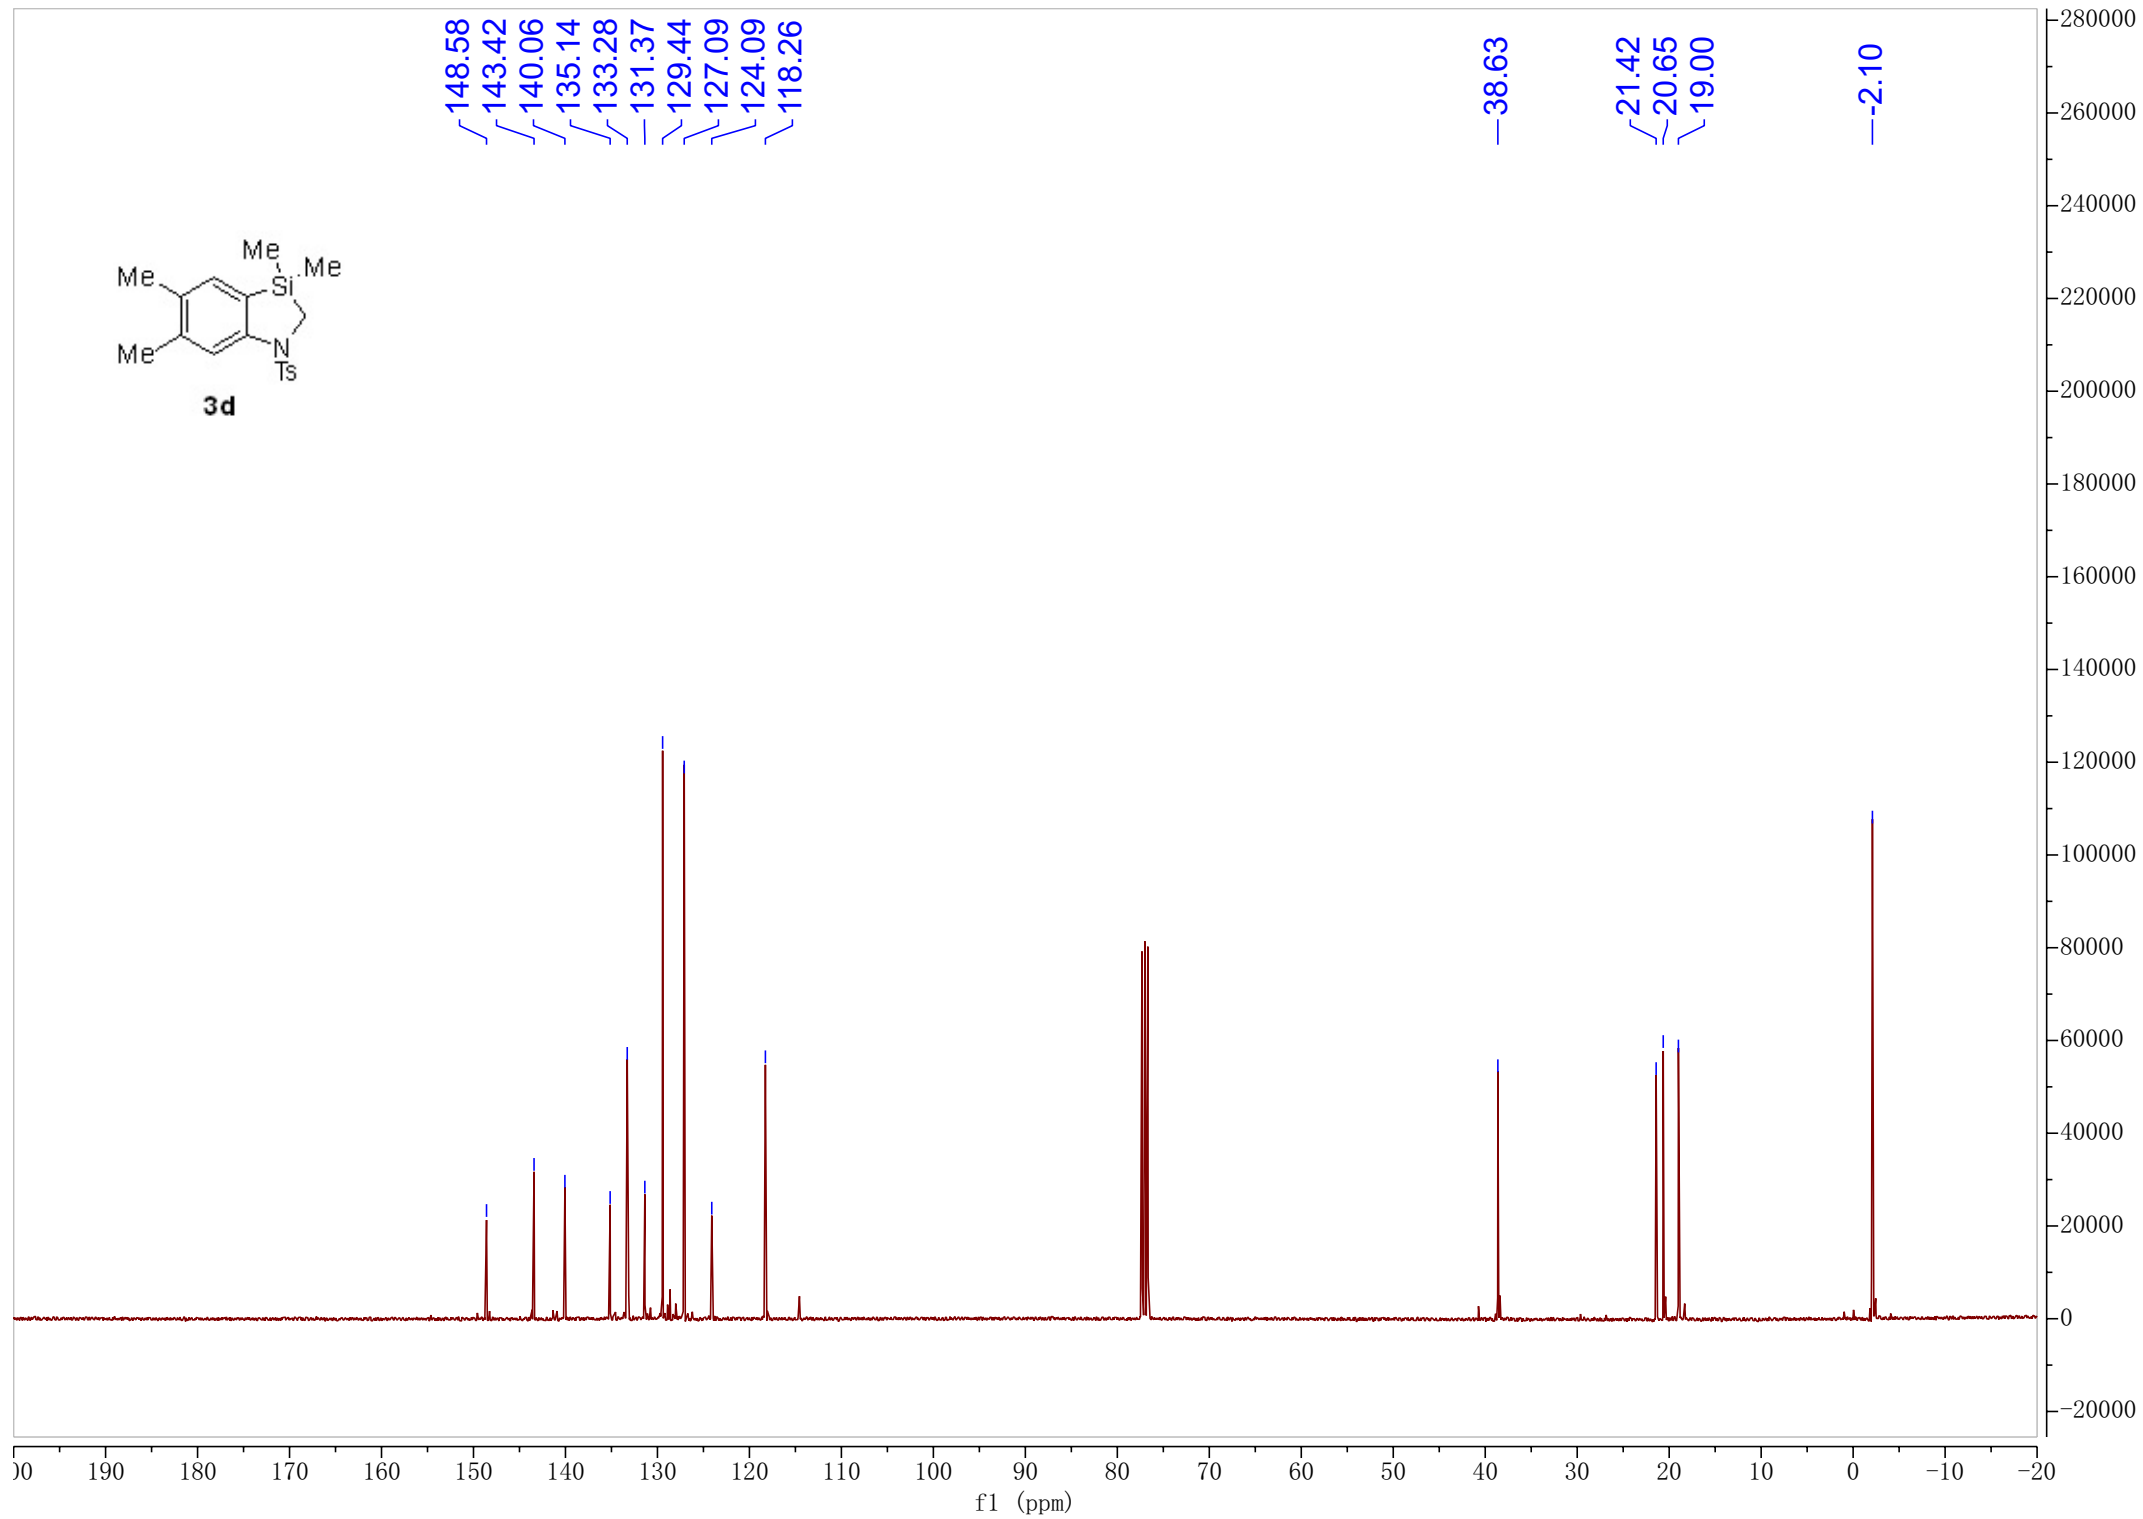



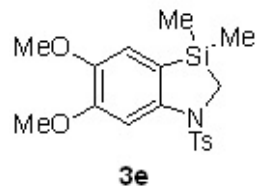

7.62  
7.58  
7.56  
7.21  
7.19  
6.78

3.93  
3.85

3.13

2.36

0.11

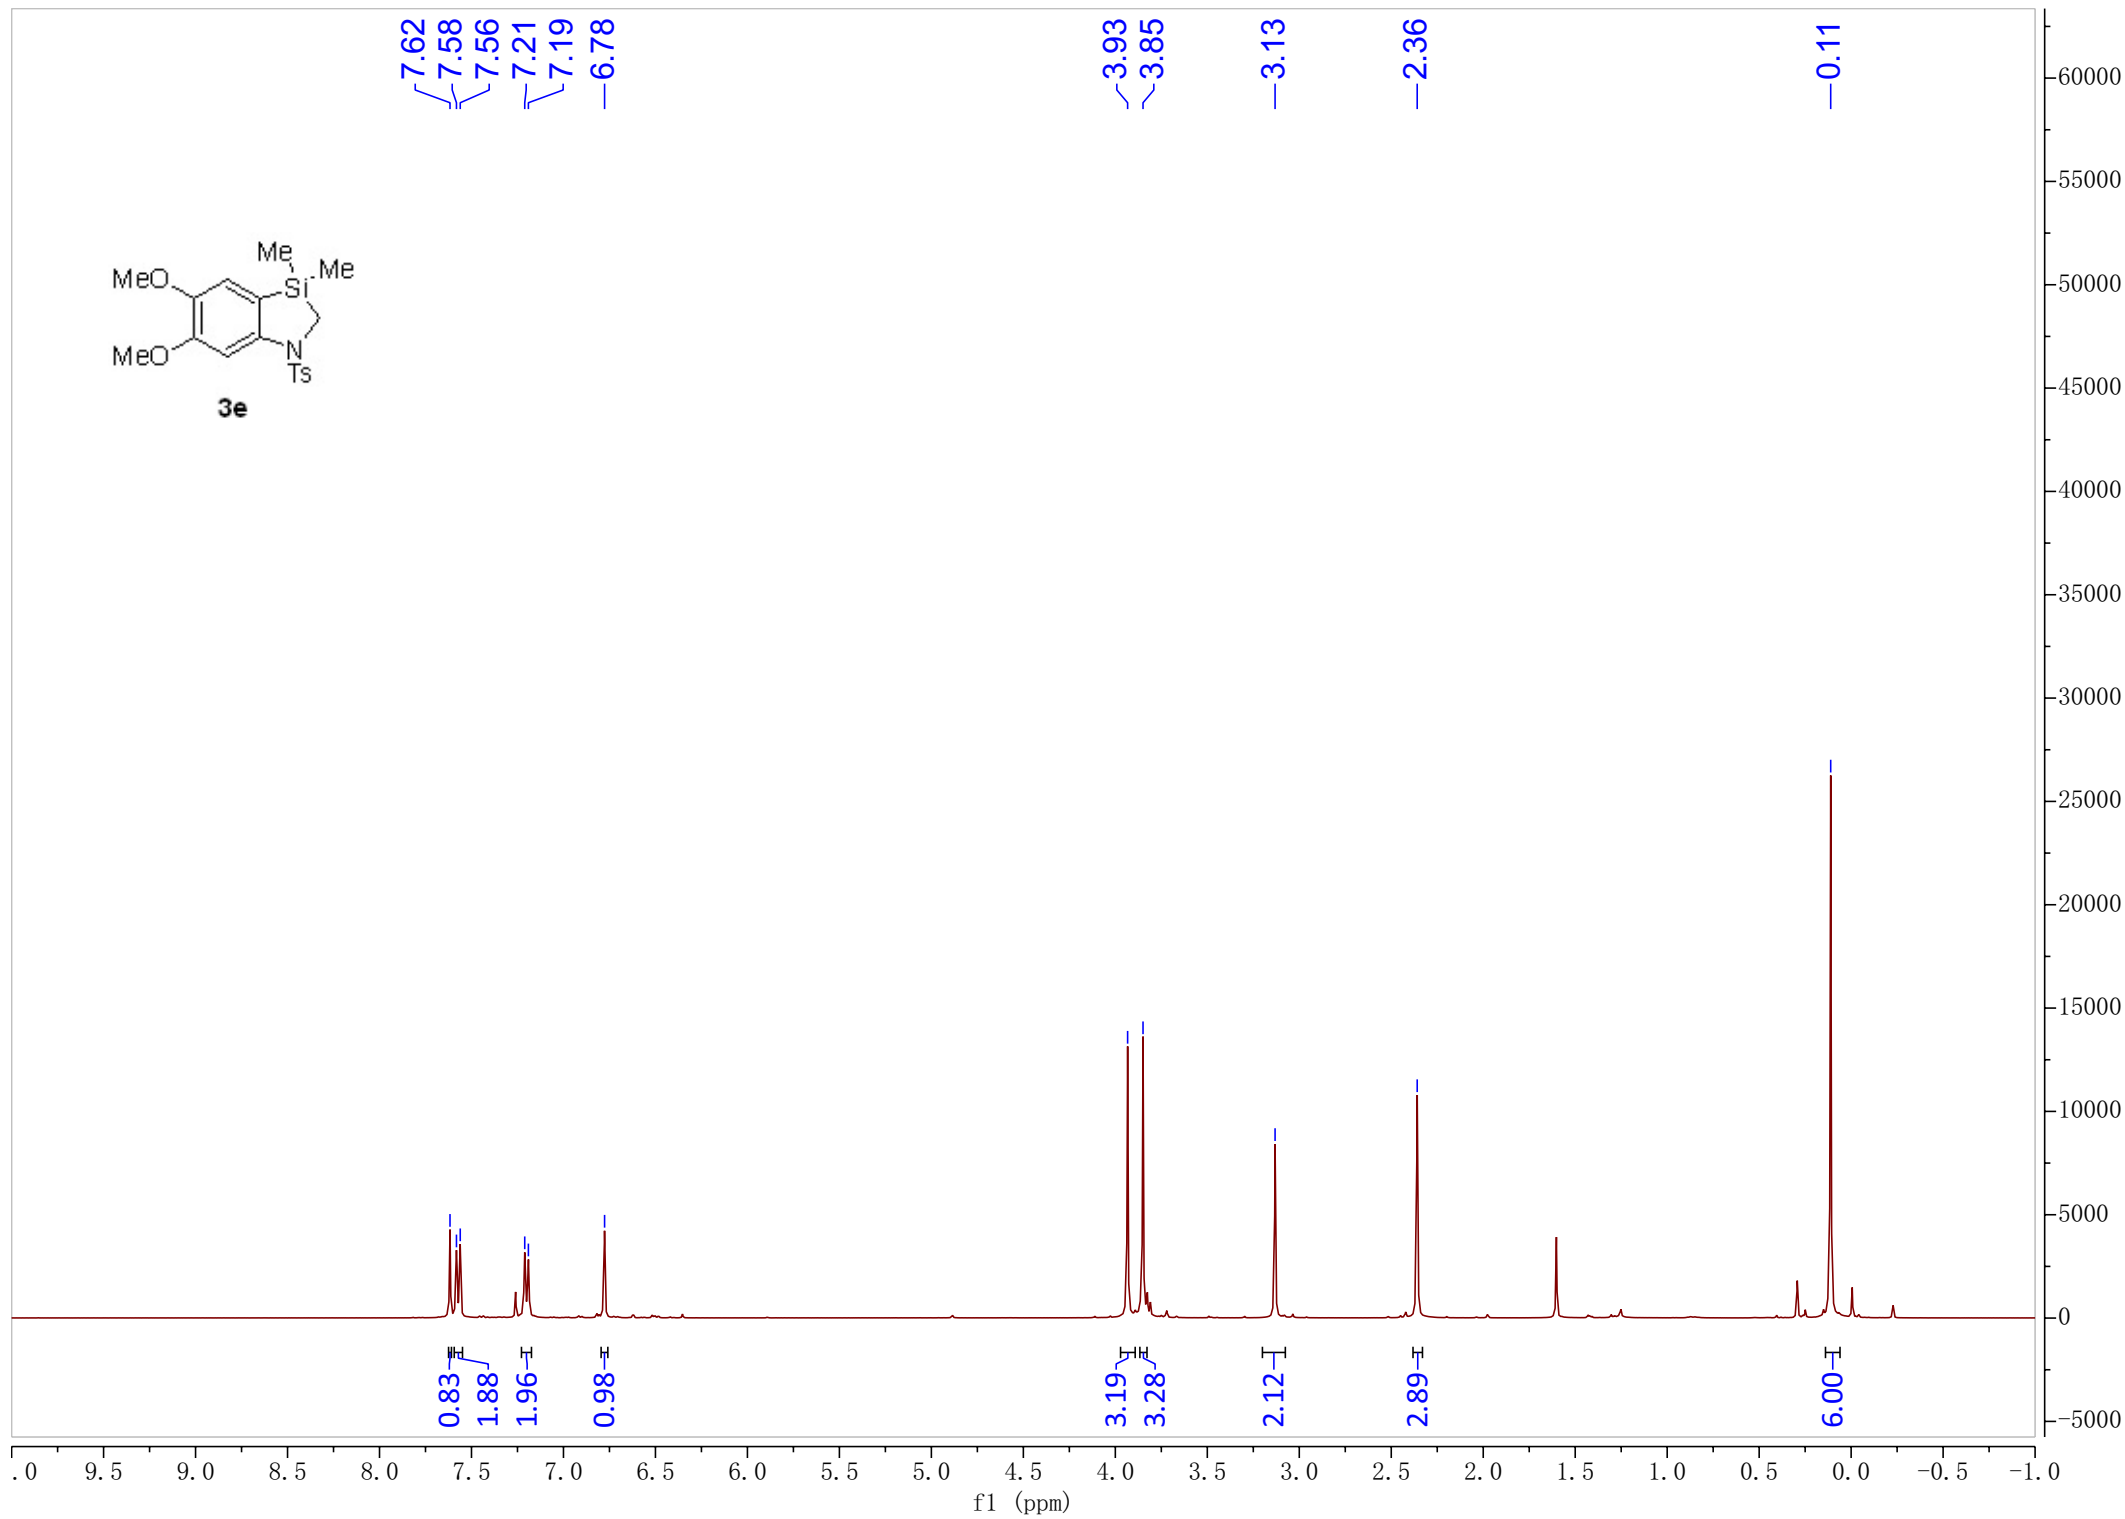

f1 (ppm)

S177

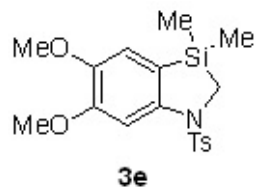

151.37  
145.72  
144.81  
143.57  
134.71  
129.43  
127.19  
117.71  
113.17  
102.61

56.03  
55.90  
39.05  
21.45  
-1.91

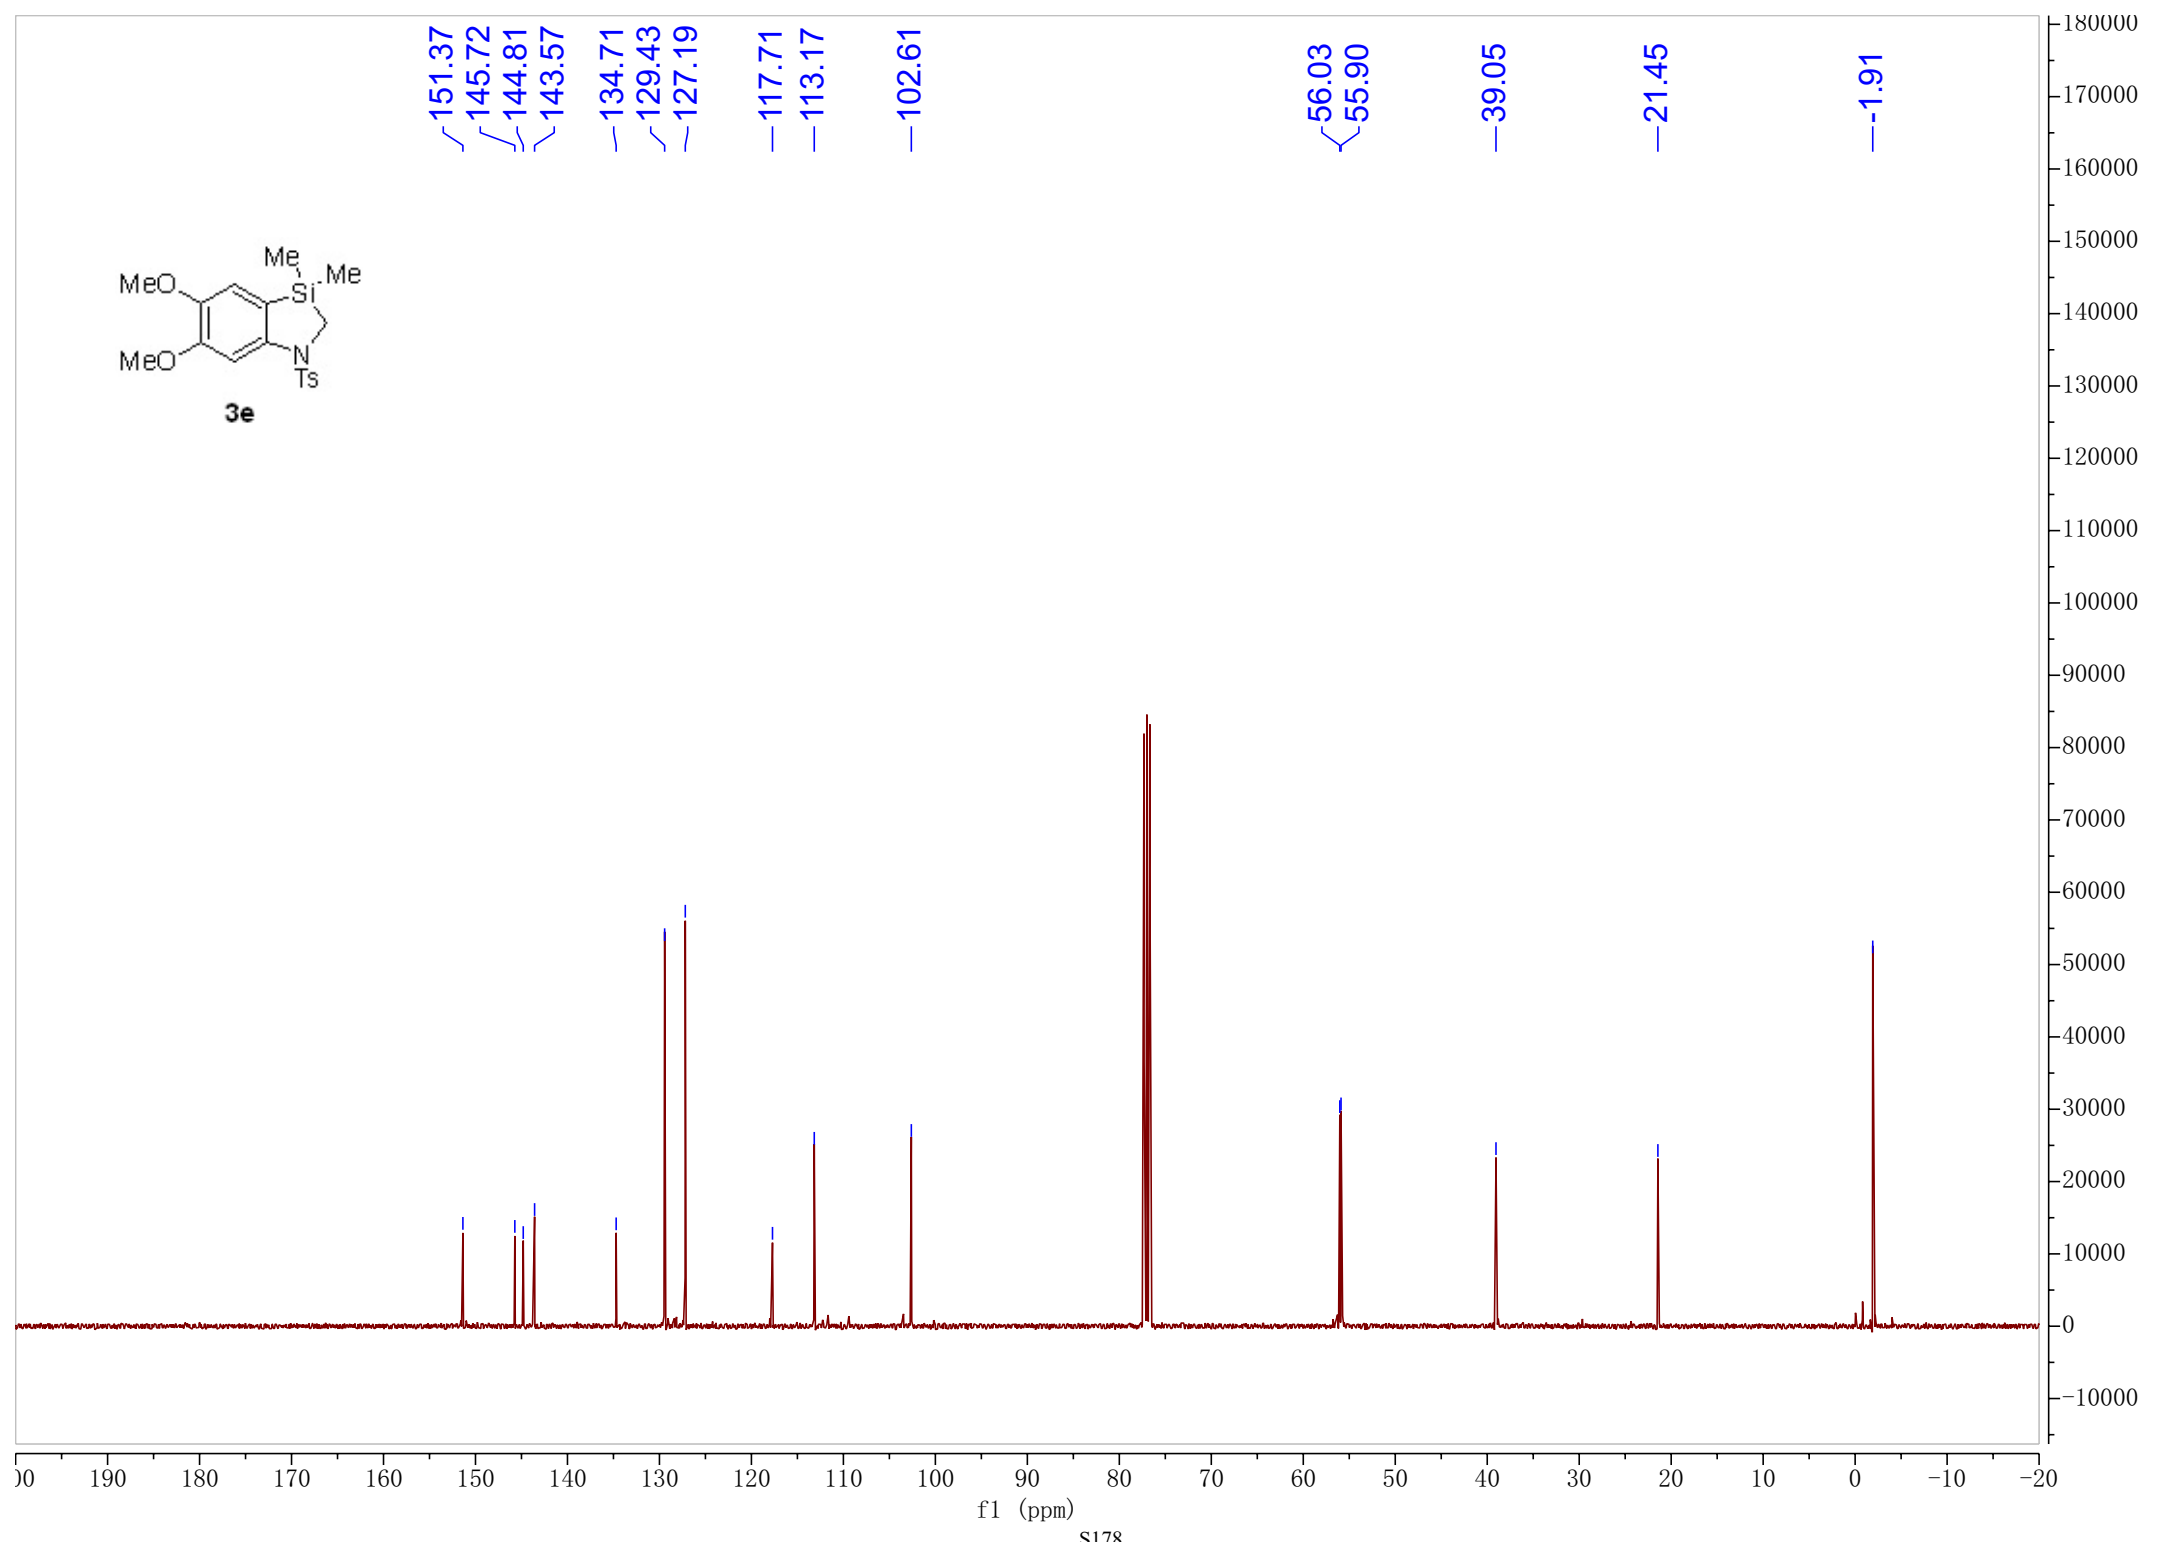

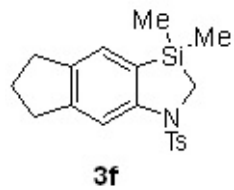

7.68  
7.54  
7.52  
7.10  
7.09  
7.08

3.06  
2.80  
2.78  
2.76  
2.71  
2.69  
2.68  
2.23  
1.98  
1.96  
1.94  
1.92  
1.90

0.05

0.87

1.96

2.90

2.06

1.98

2.03

2.97

2.23

6.00

9.5 9.0 8.5 8.0 7.5 7.0 6.5 6.0 5.5 5.0 4.5 4.0 3.5 3.0 2.5 2.0 1.5 1.0 0.5 0.0 -0.5 -1.0

f1 (ppm)

S179

80000  
75000  
70000  
65000  
60000  
55000  
50000  
45000  
40000  
35000  
30000  
25000  
20000  
15000  
10000  
5000  
0  
-5000

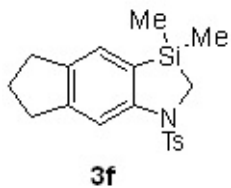

148.97  
148.37  
143.39  
139.10  
135.16  
129.42  
127.80  
127.06  
124.81  
— 113.48

39.01  
33.26  
31.69  
25.63  
21.38

— 2.13

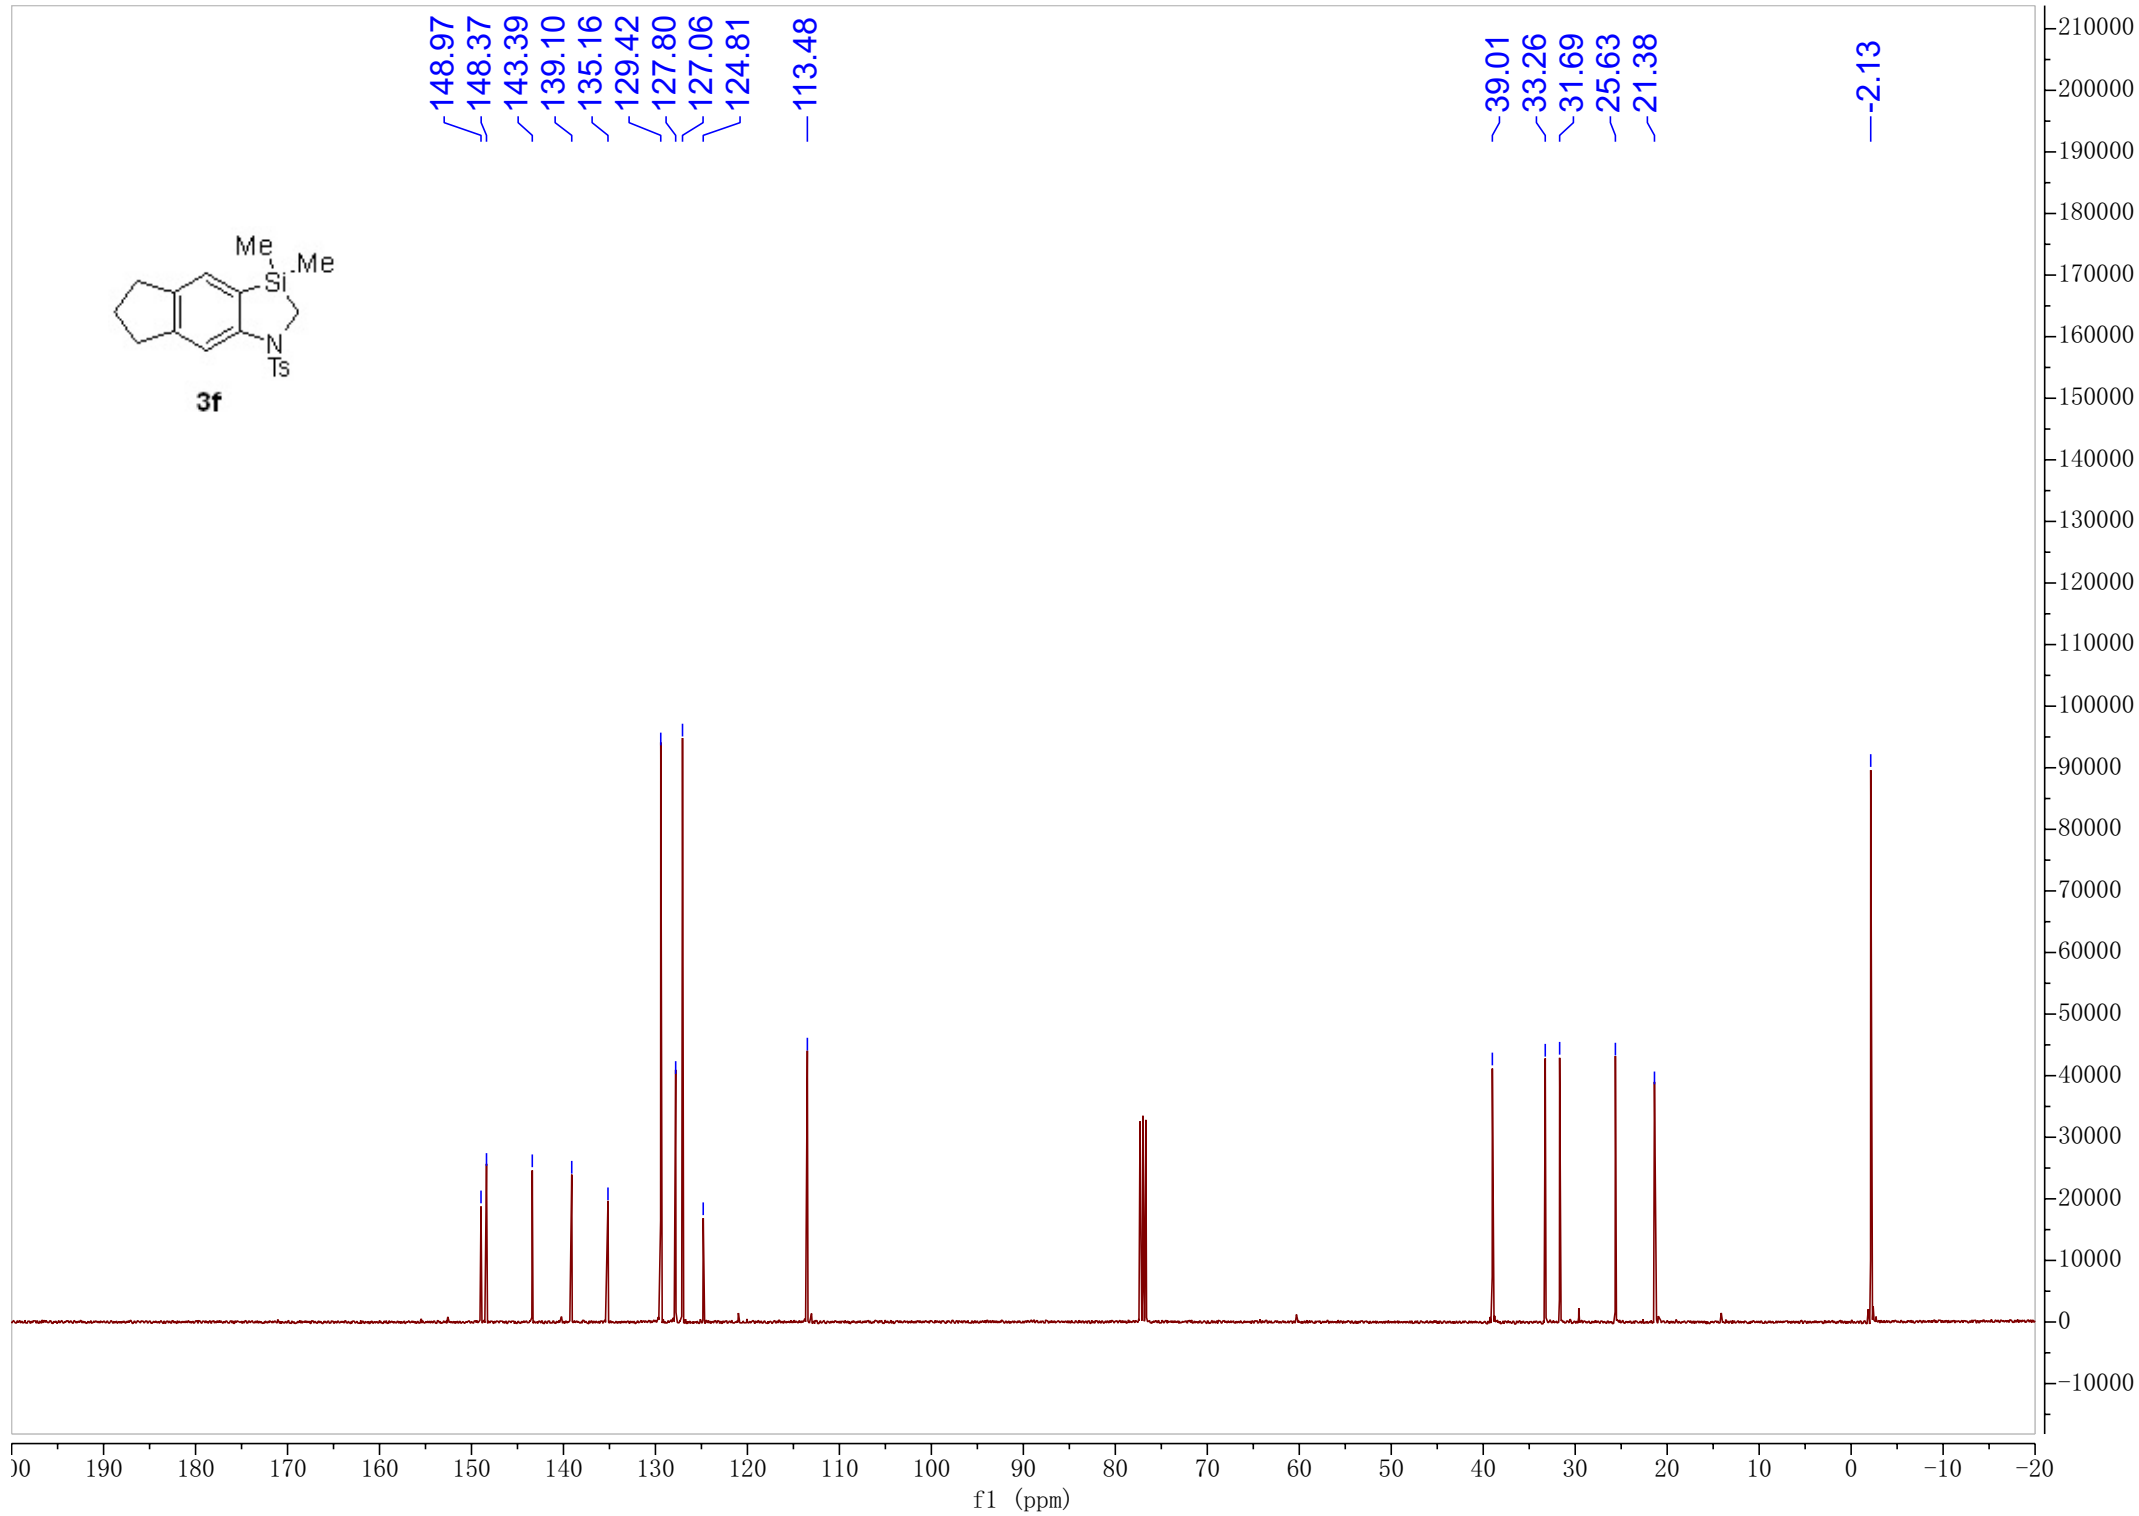

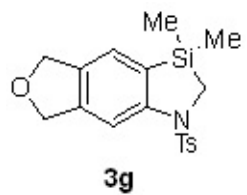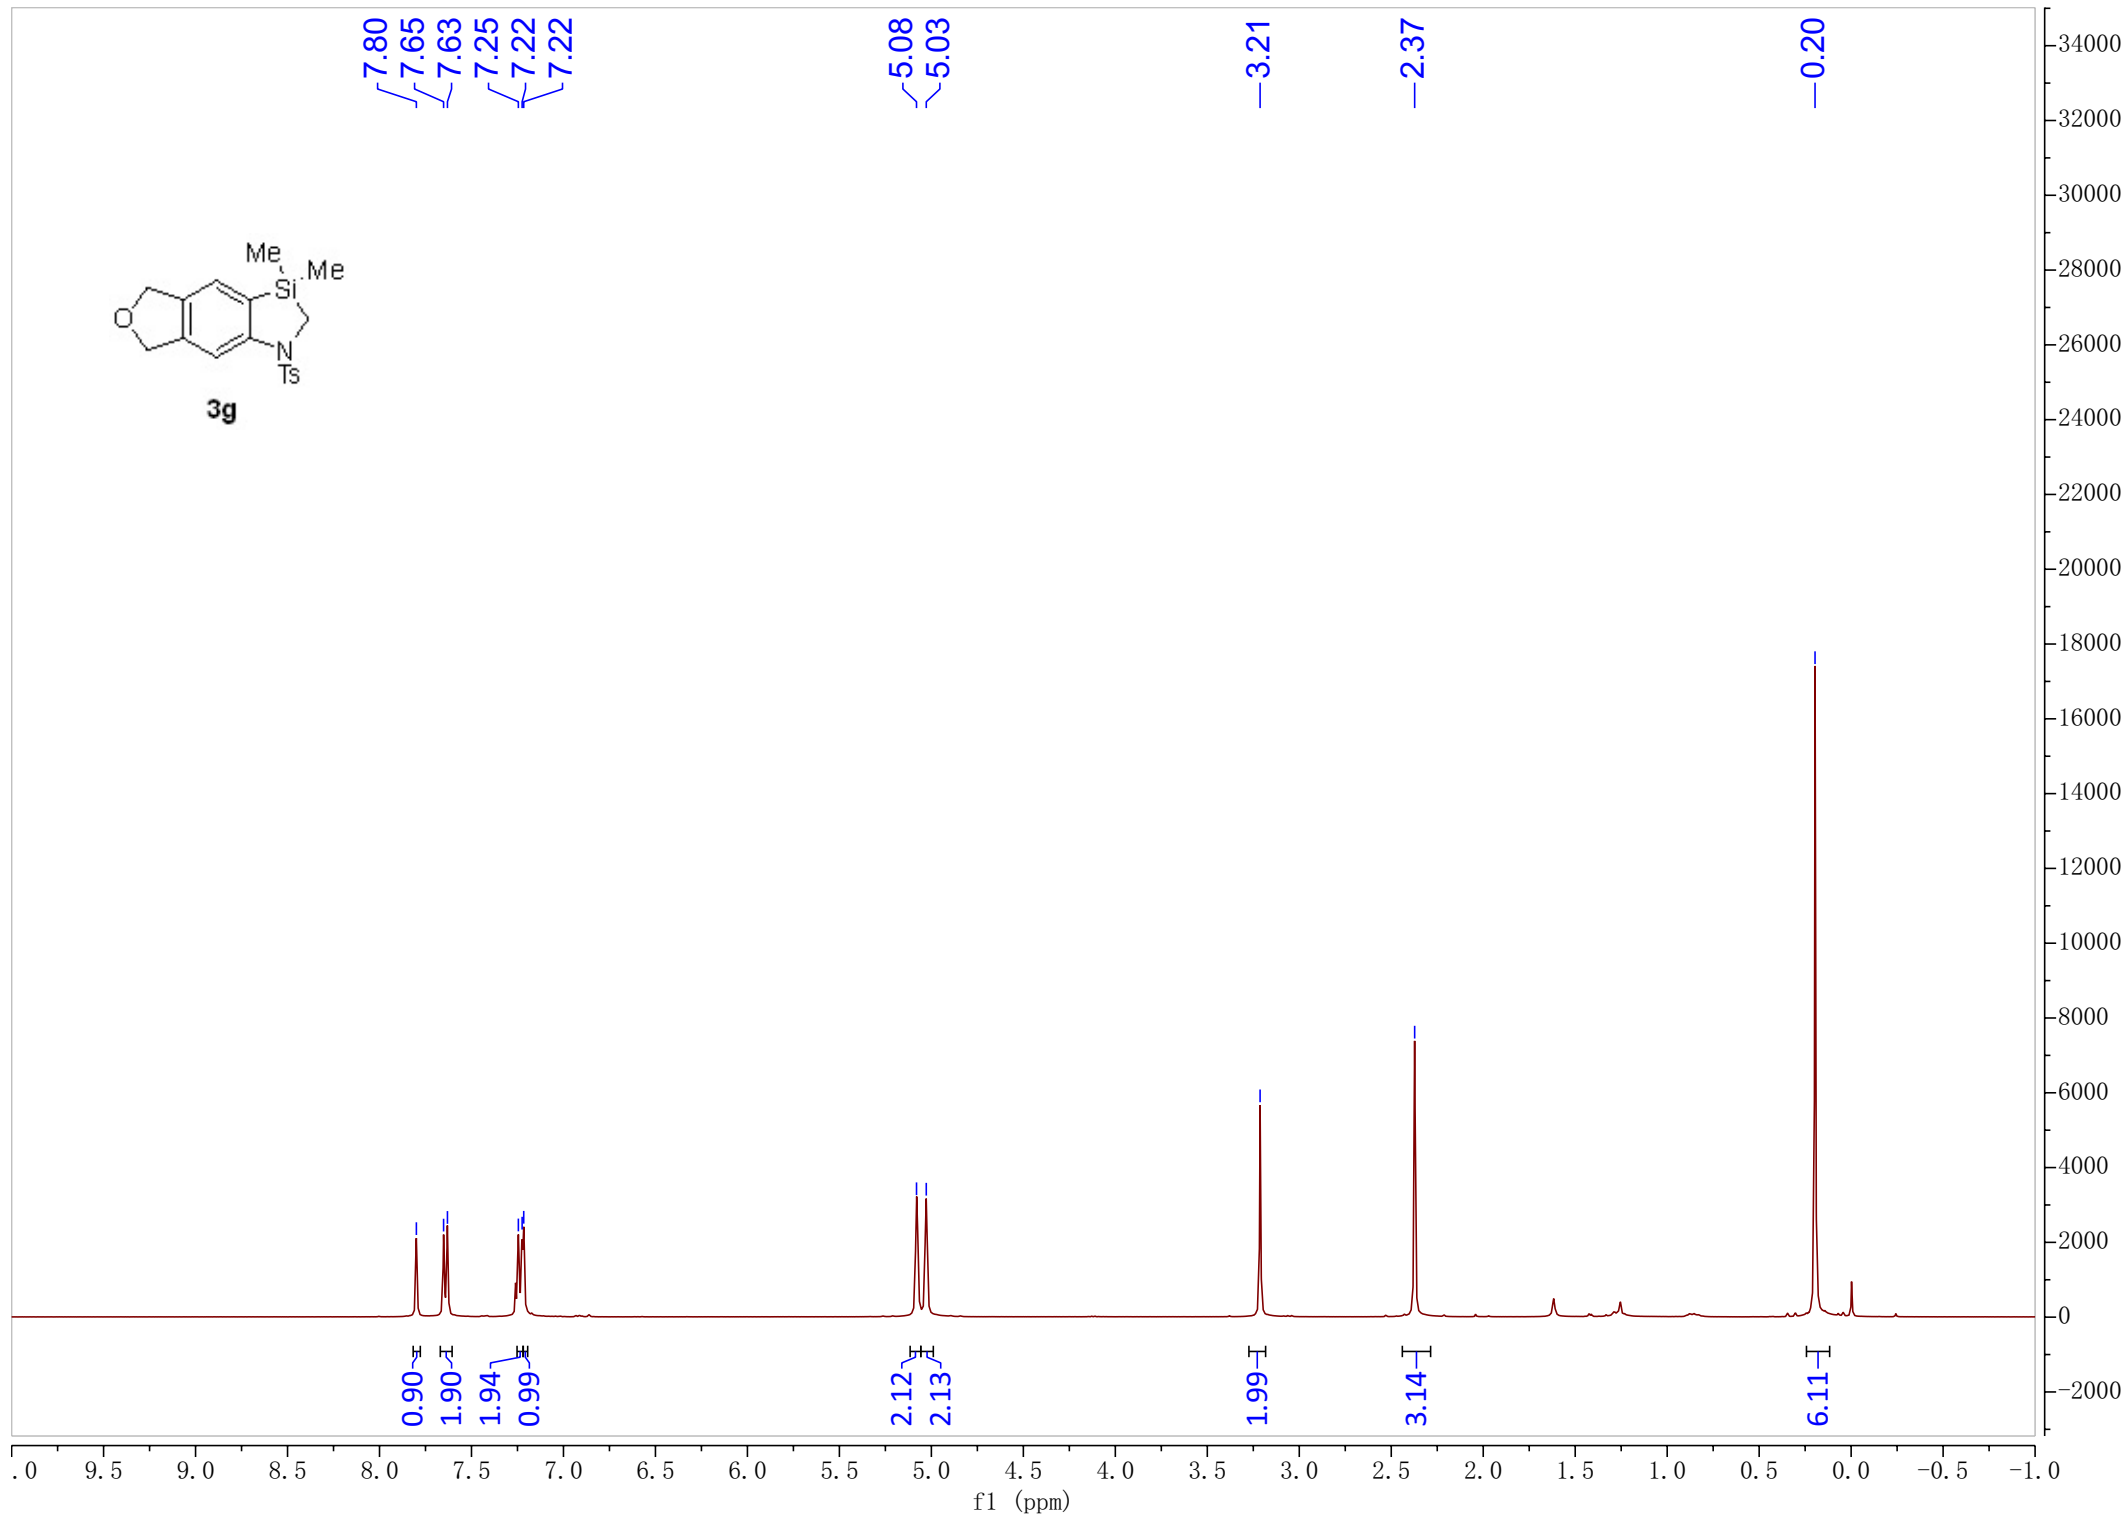

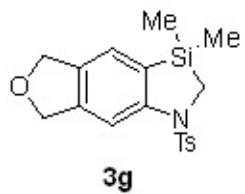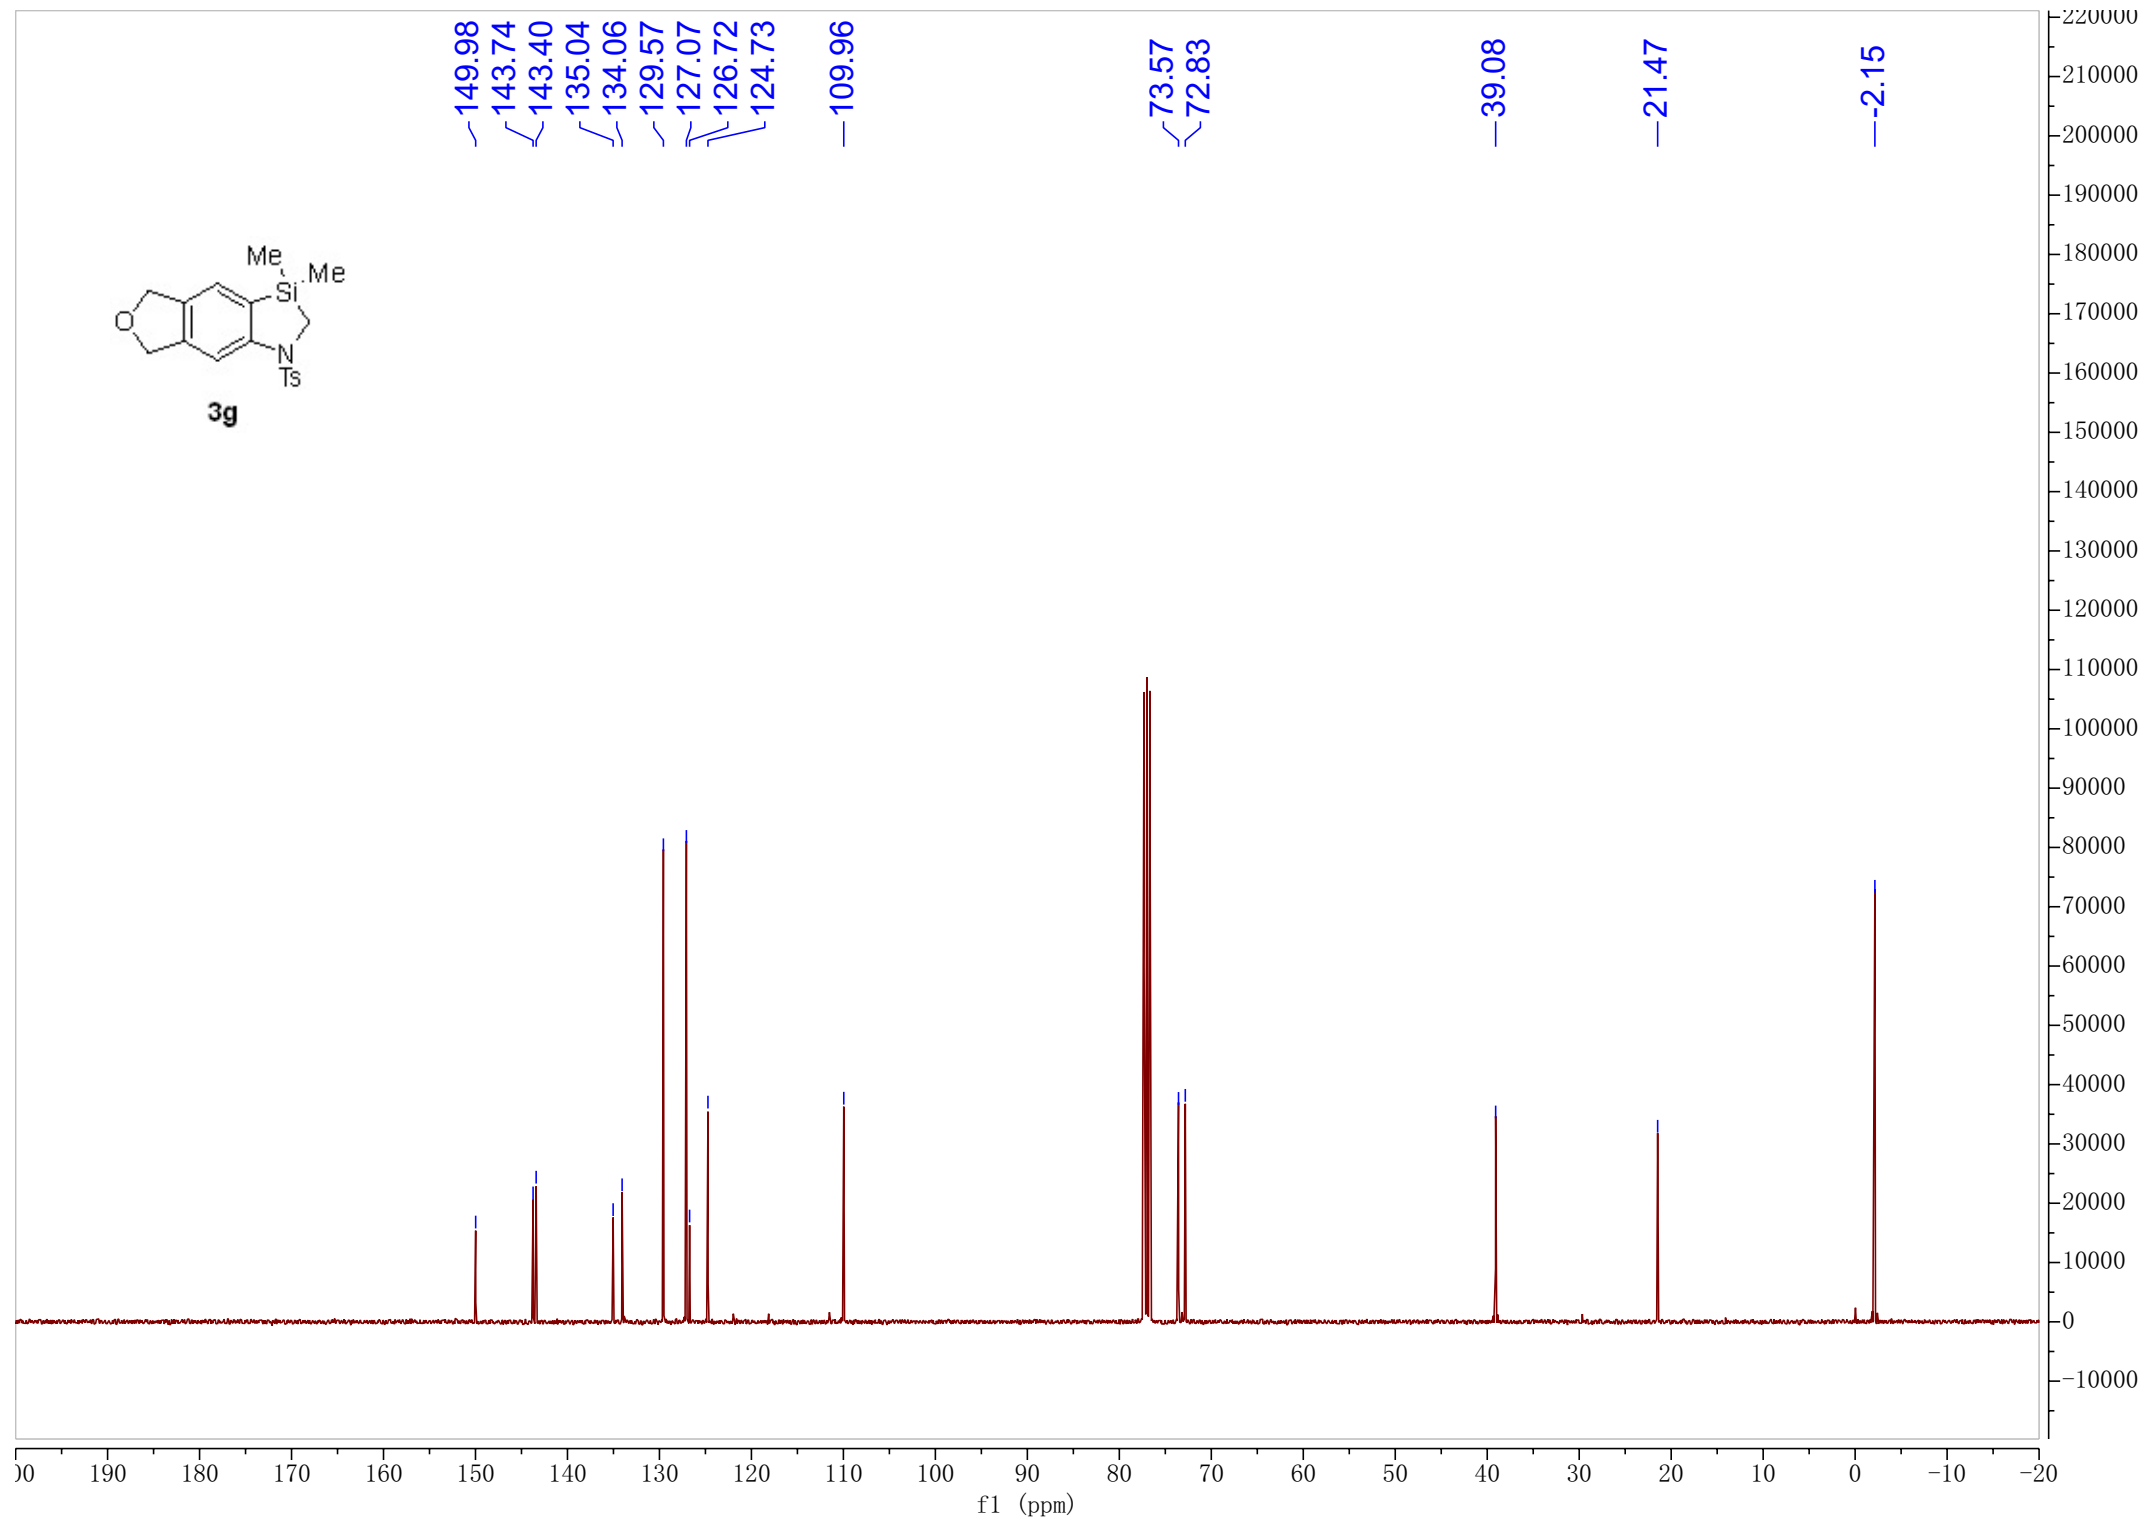

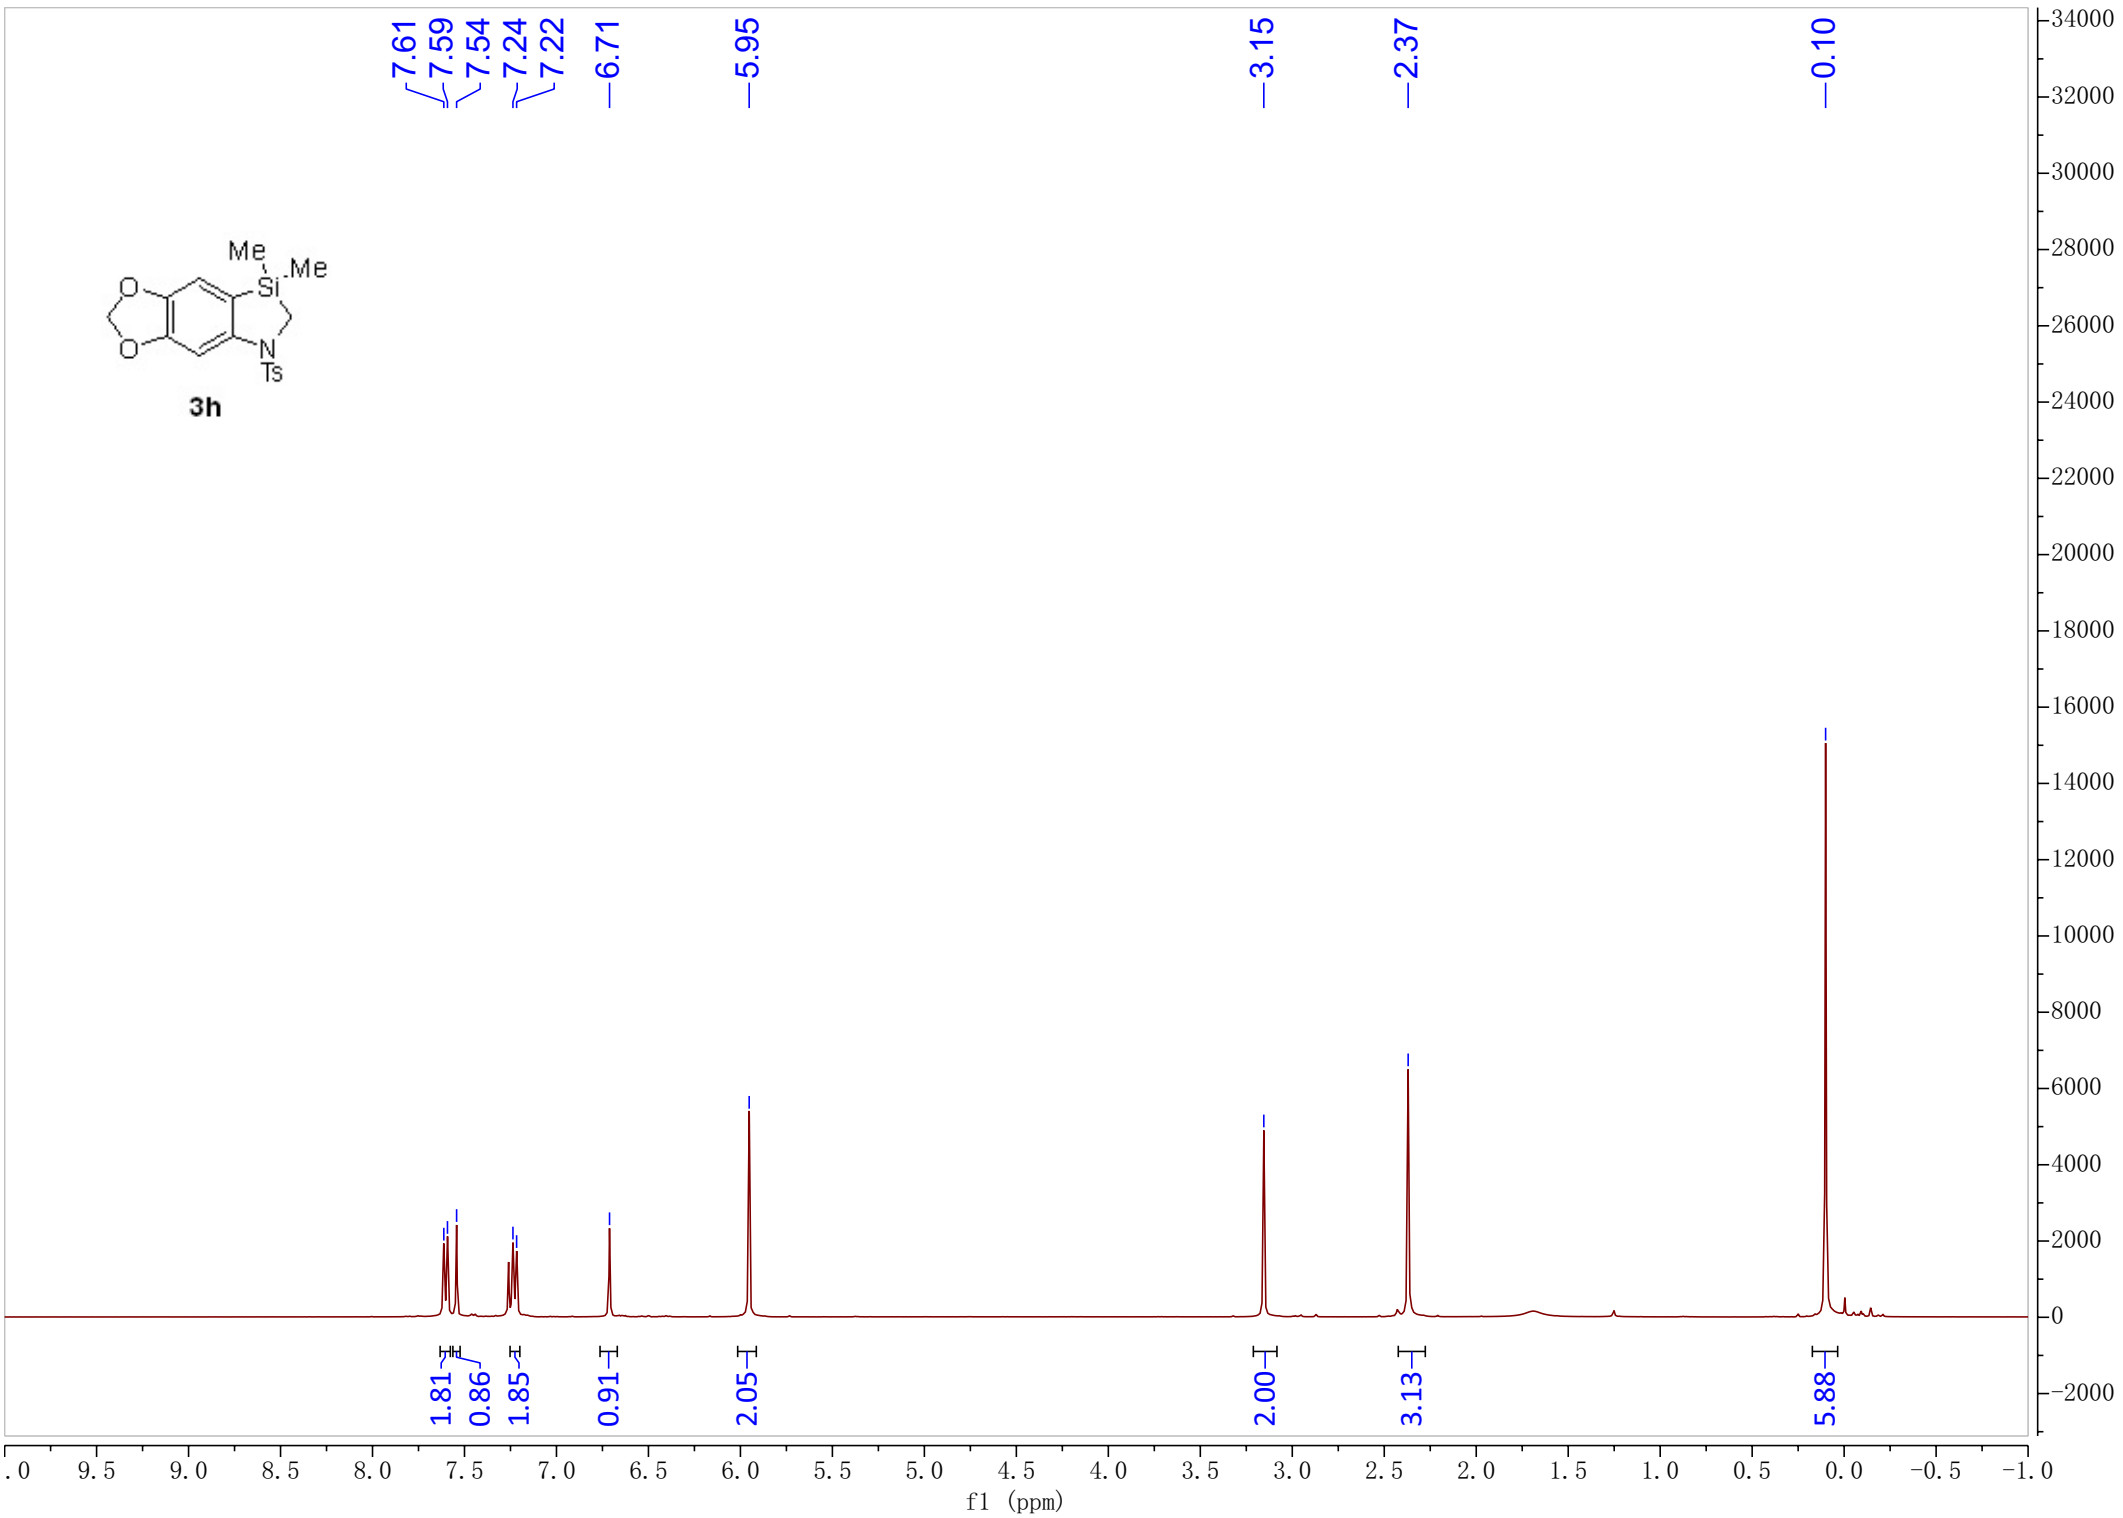

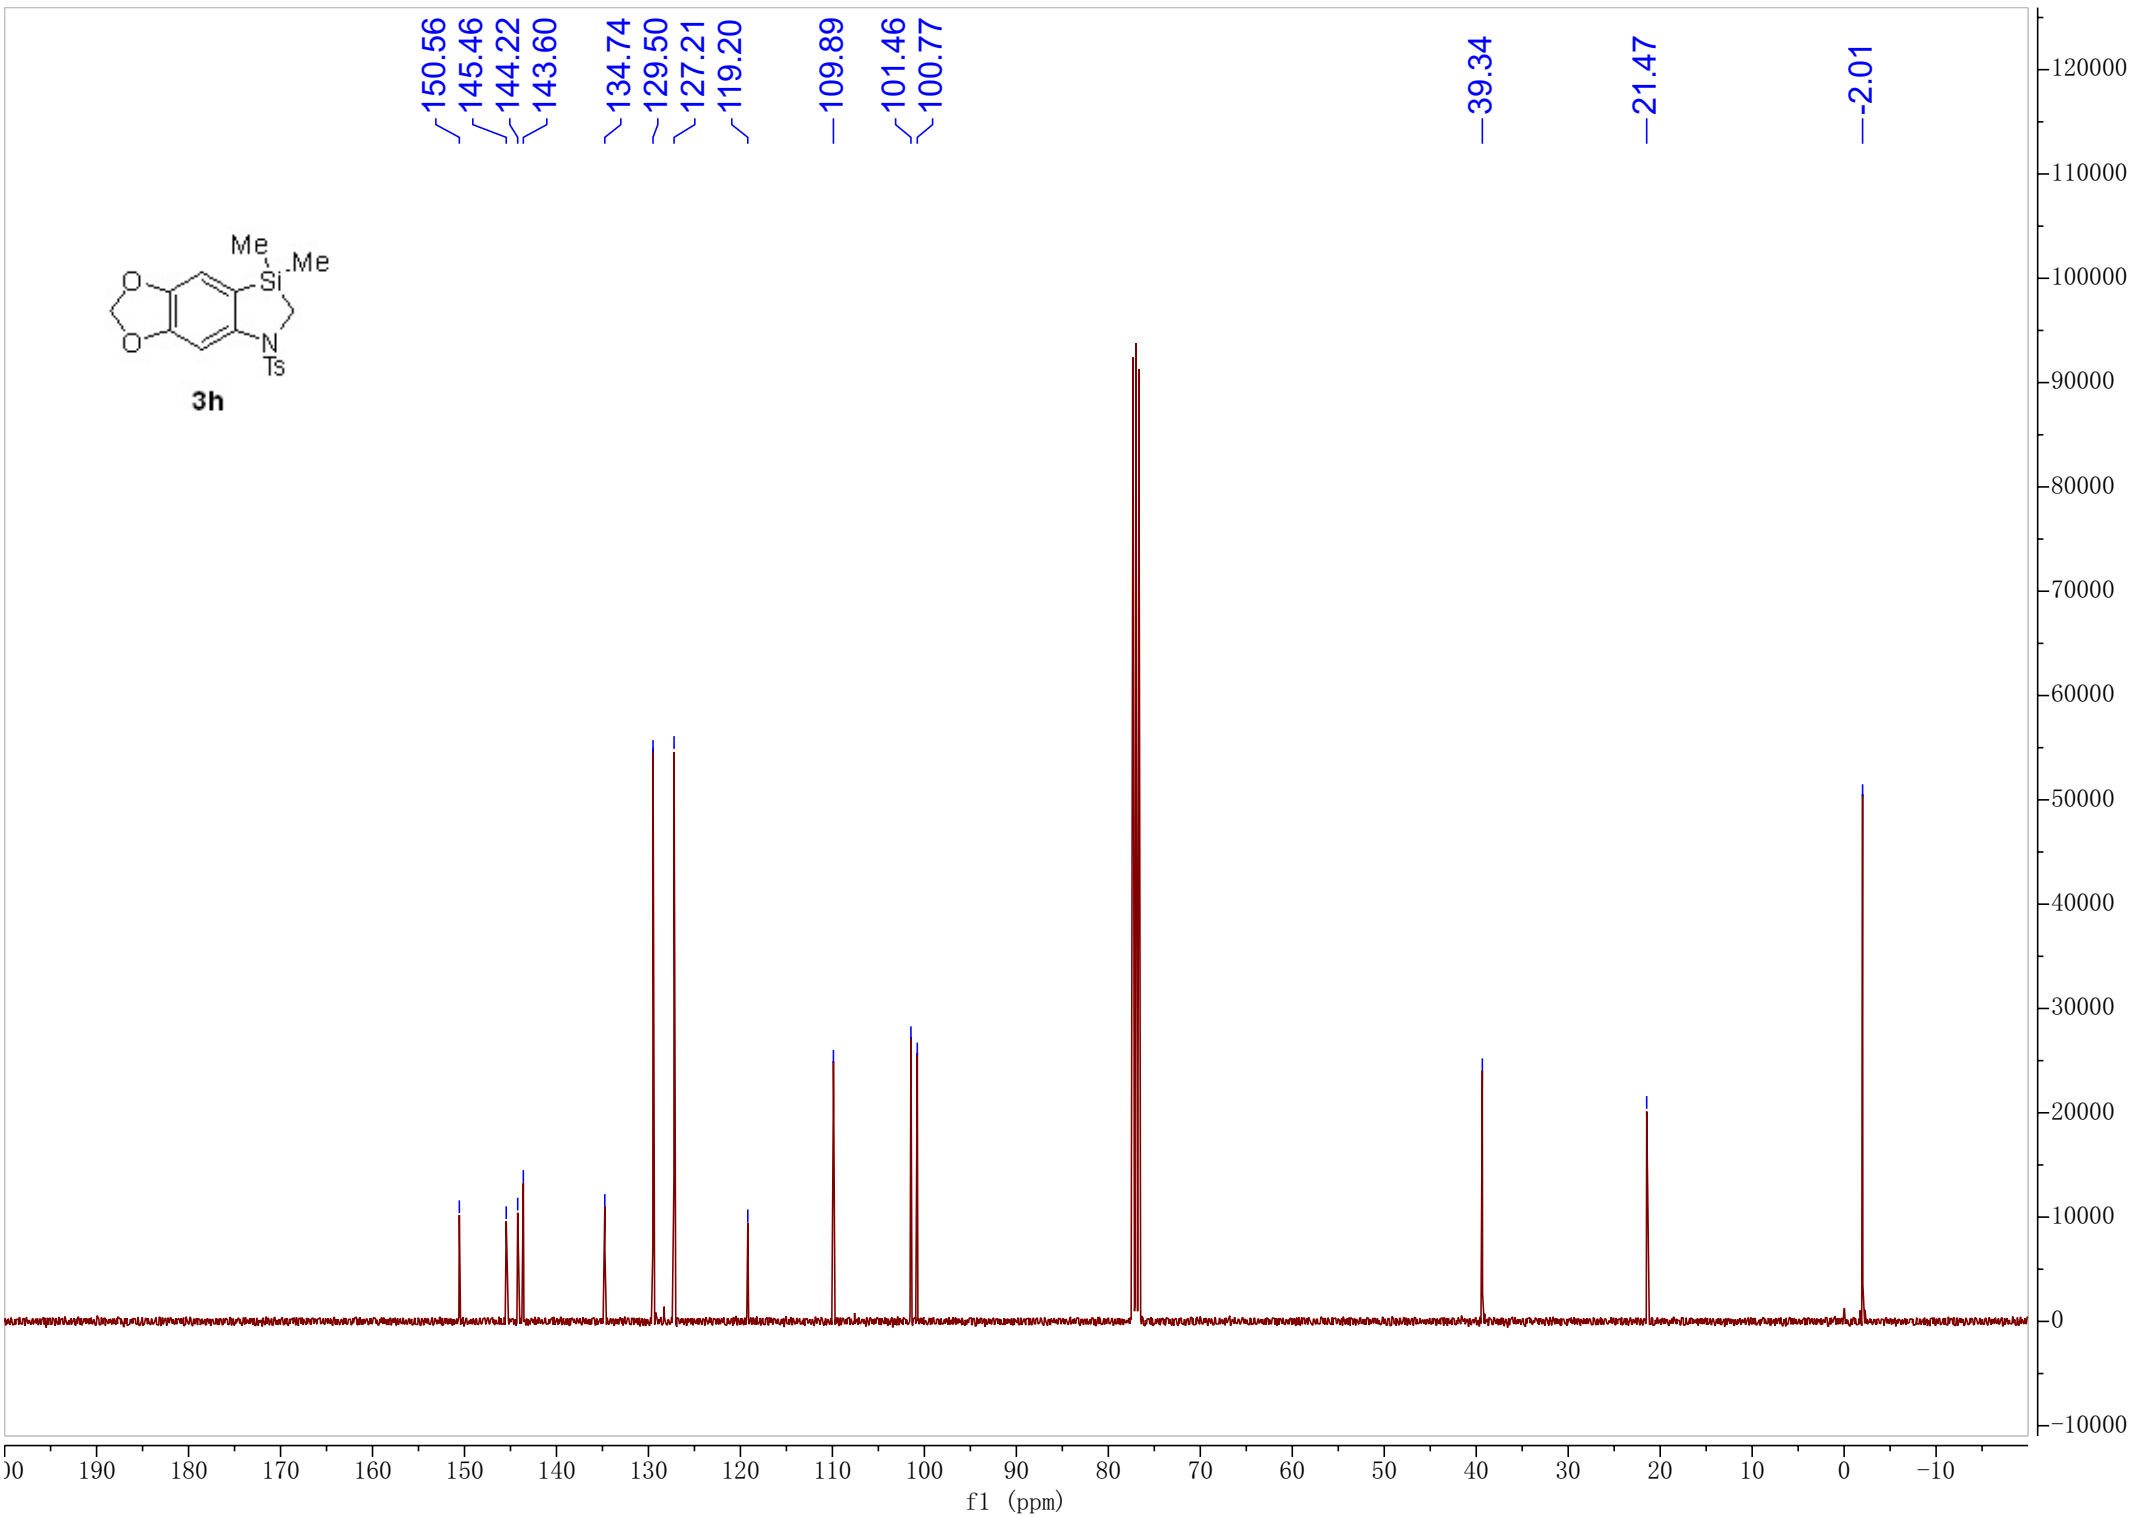



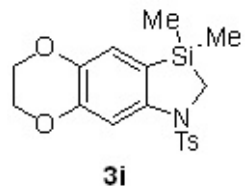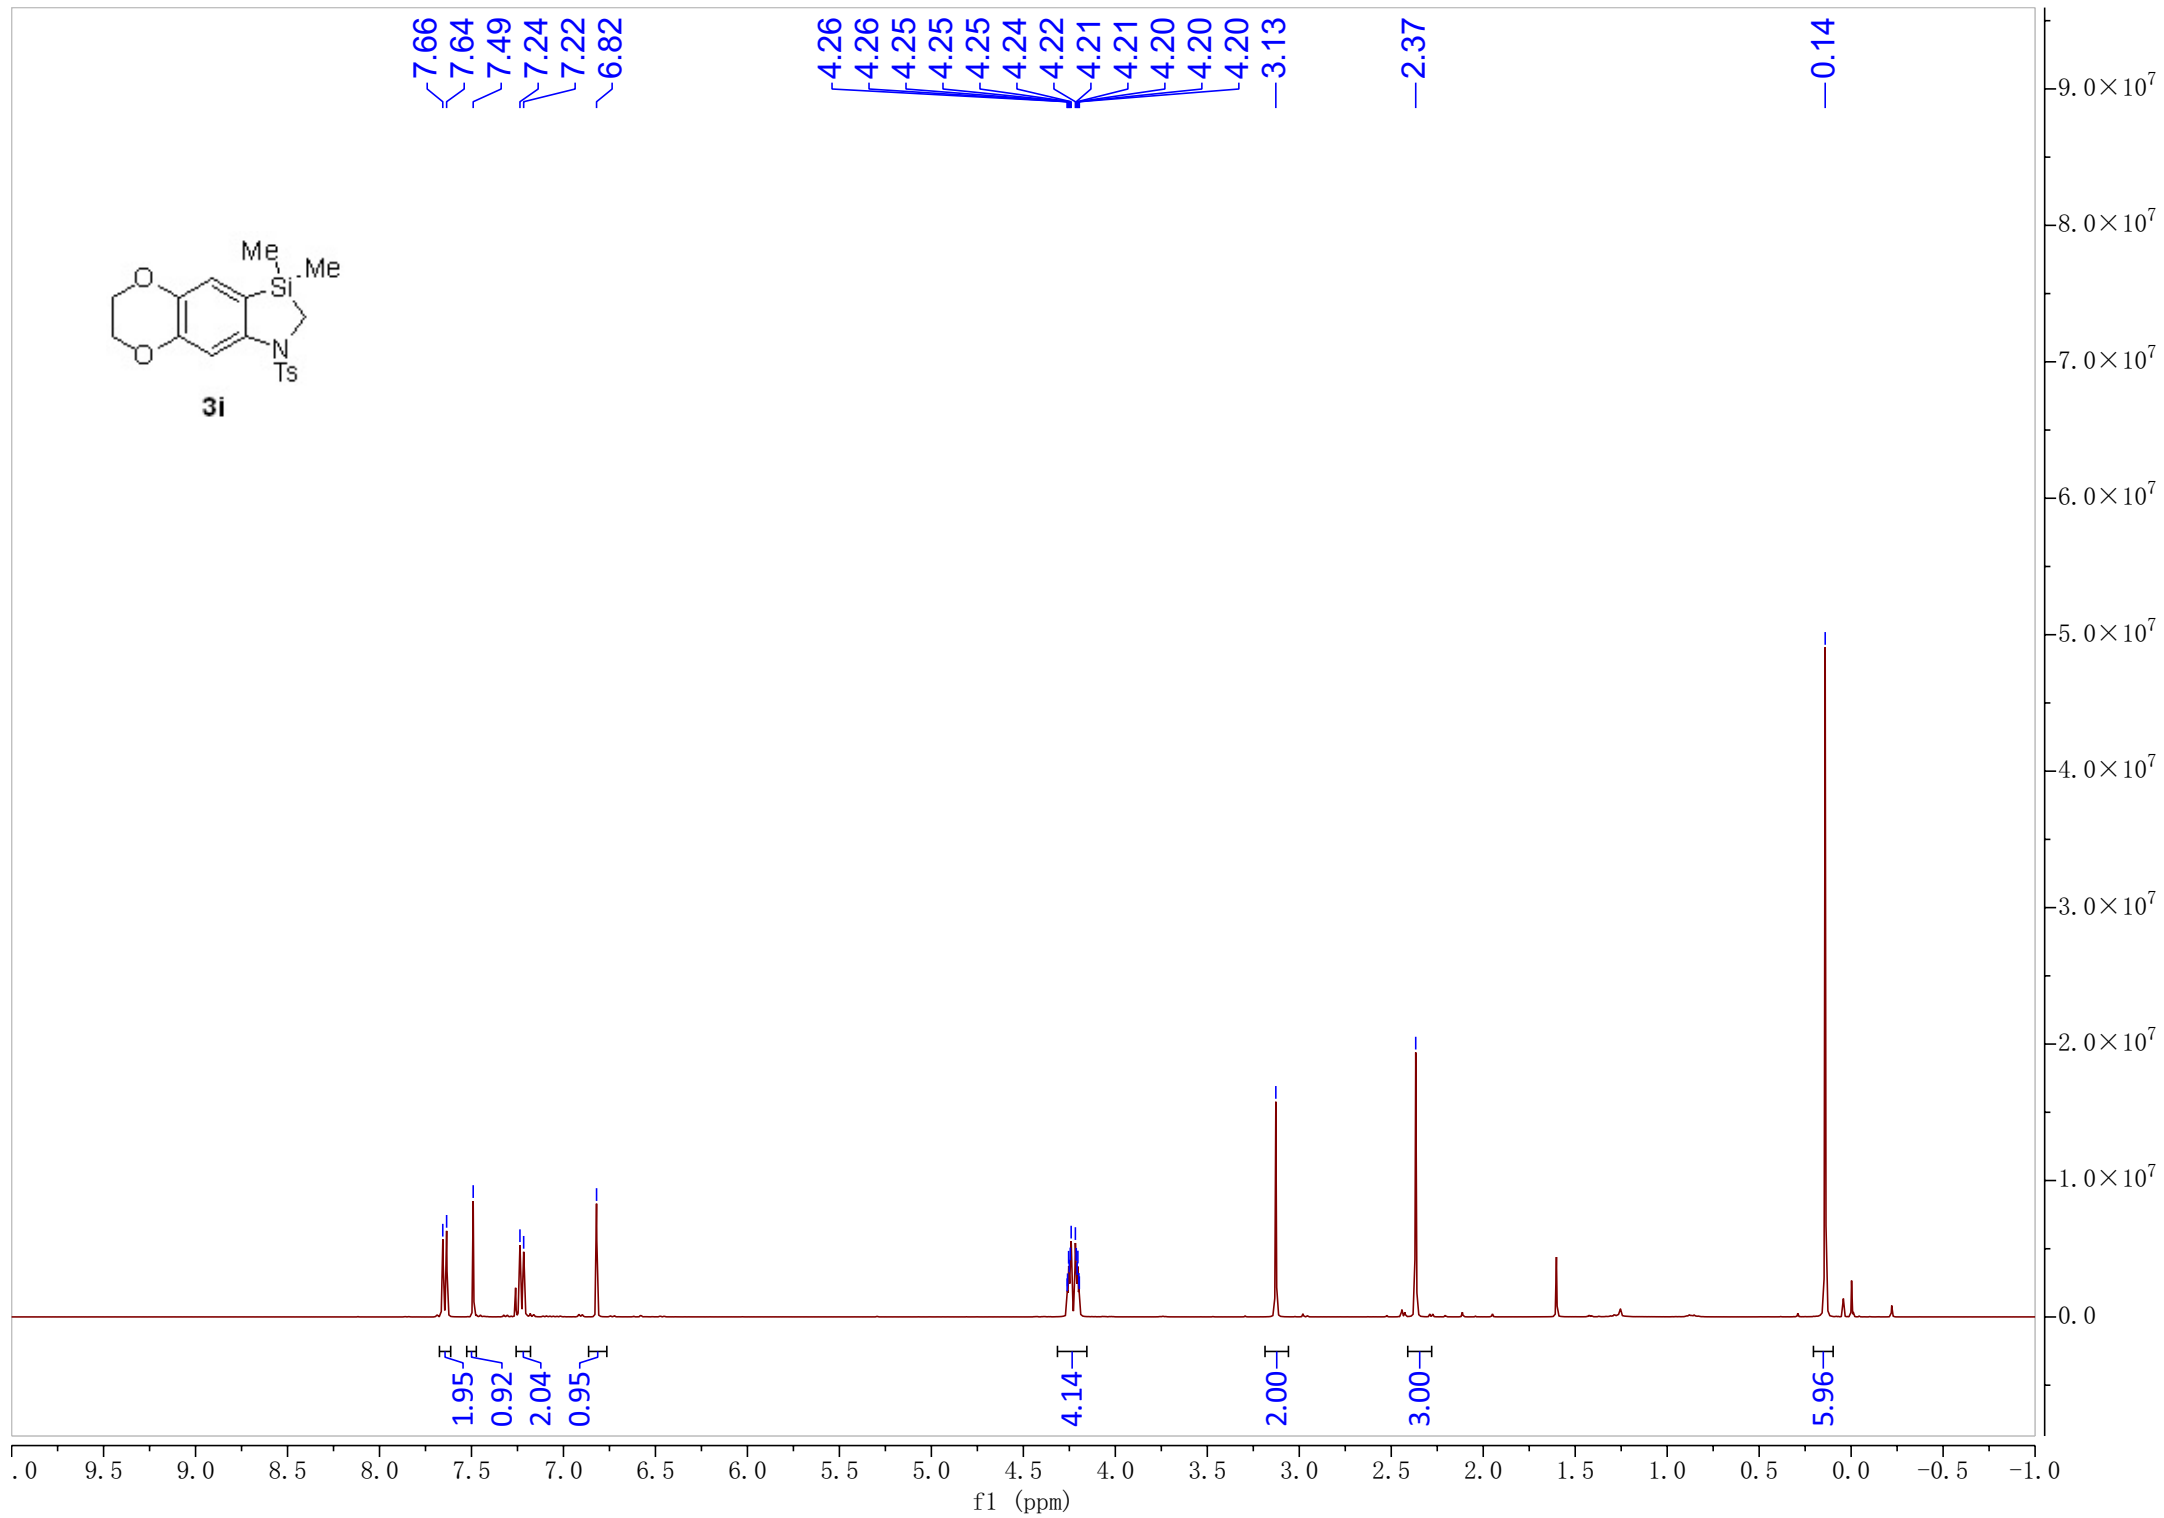

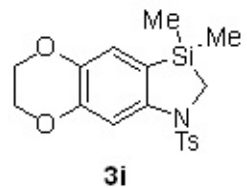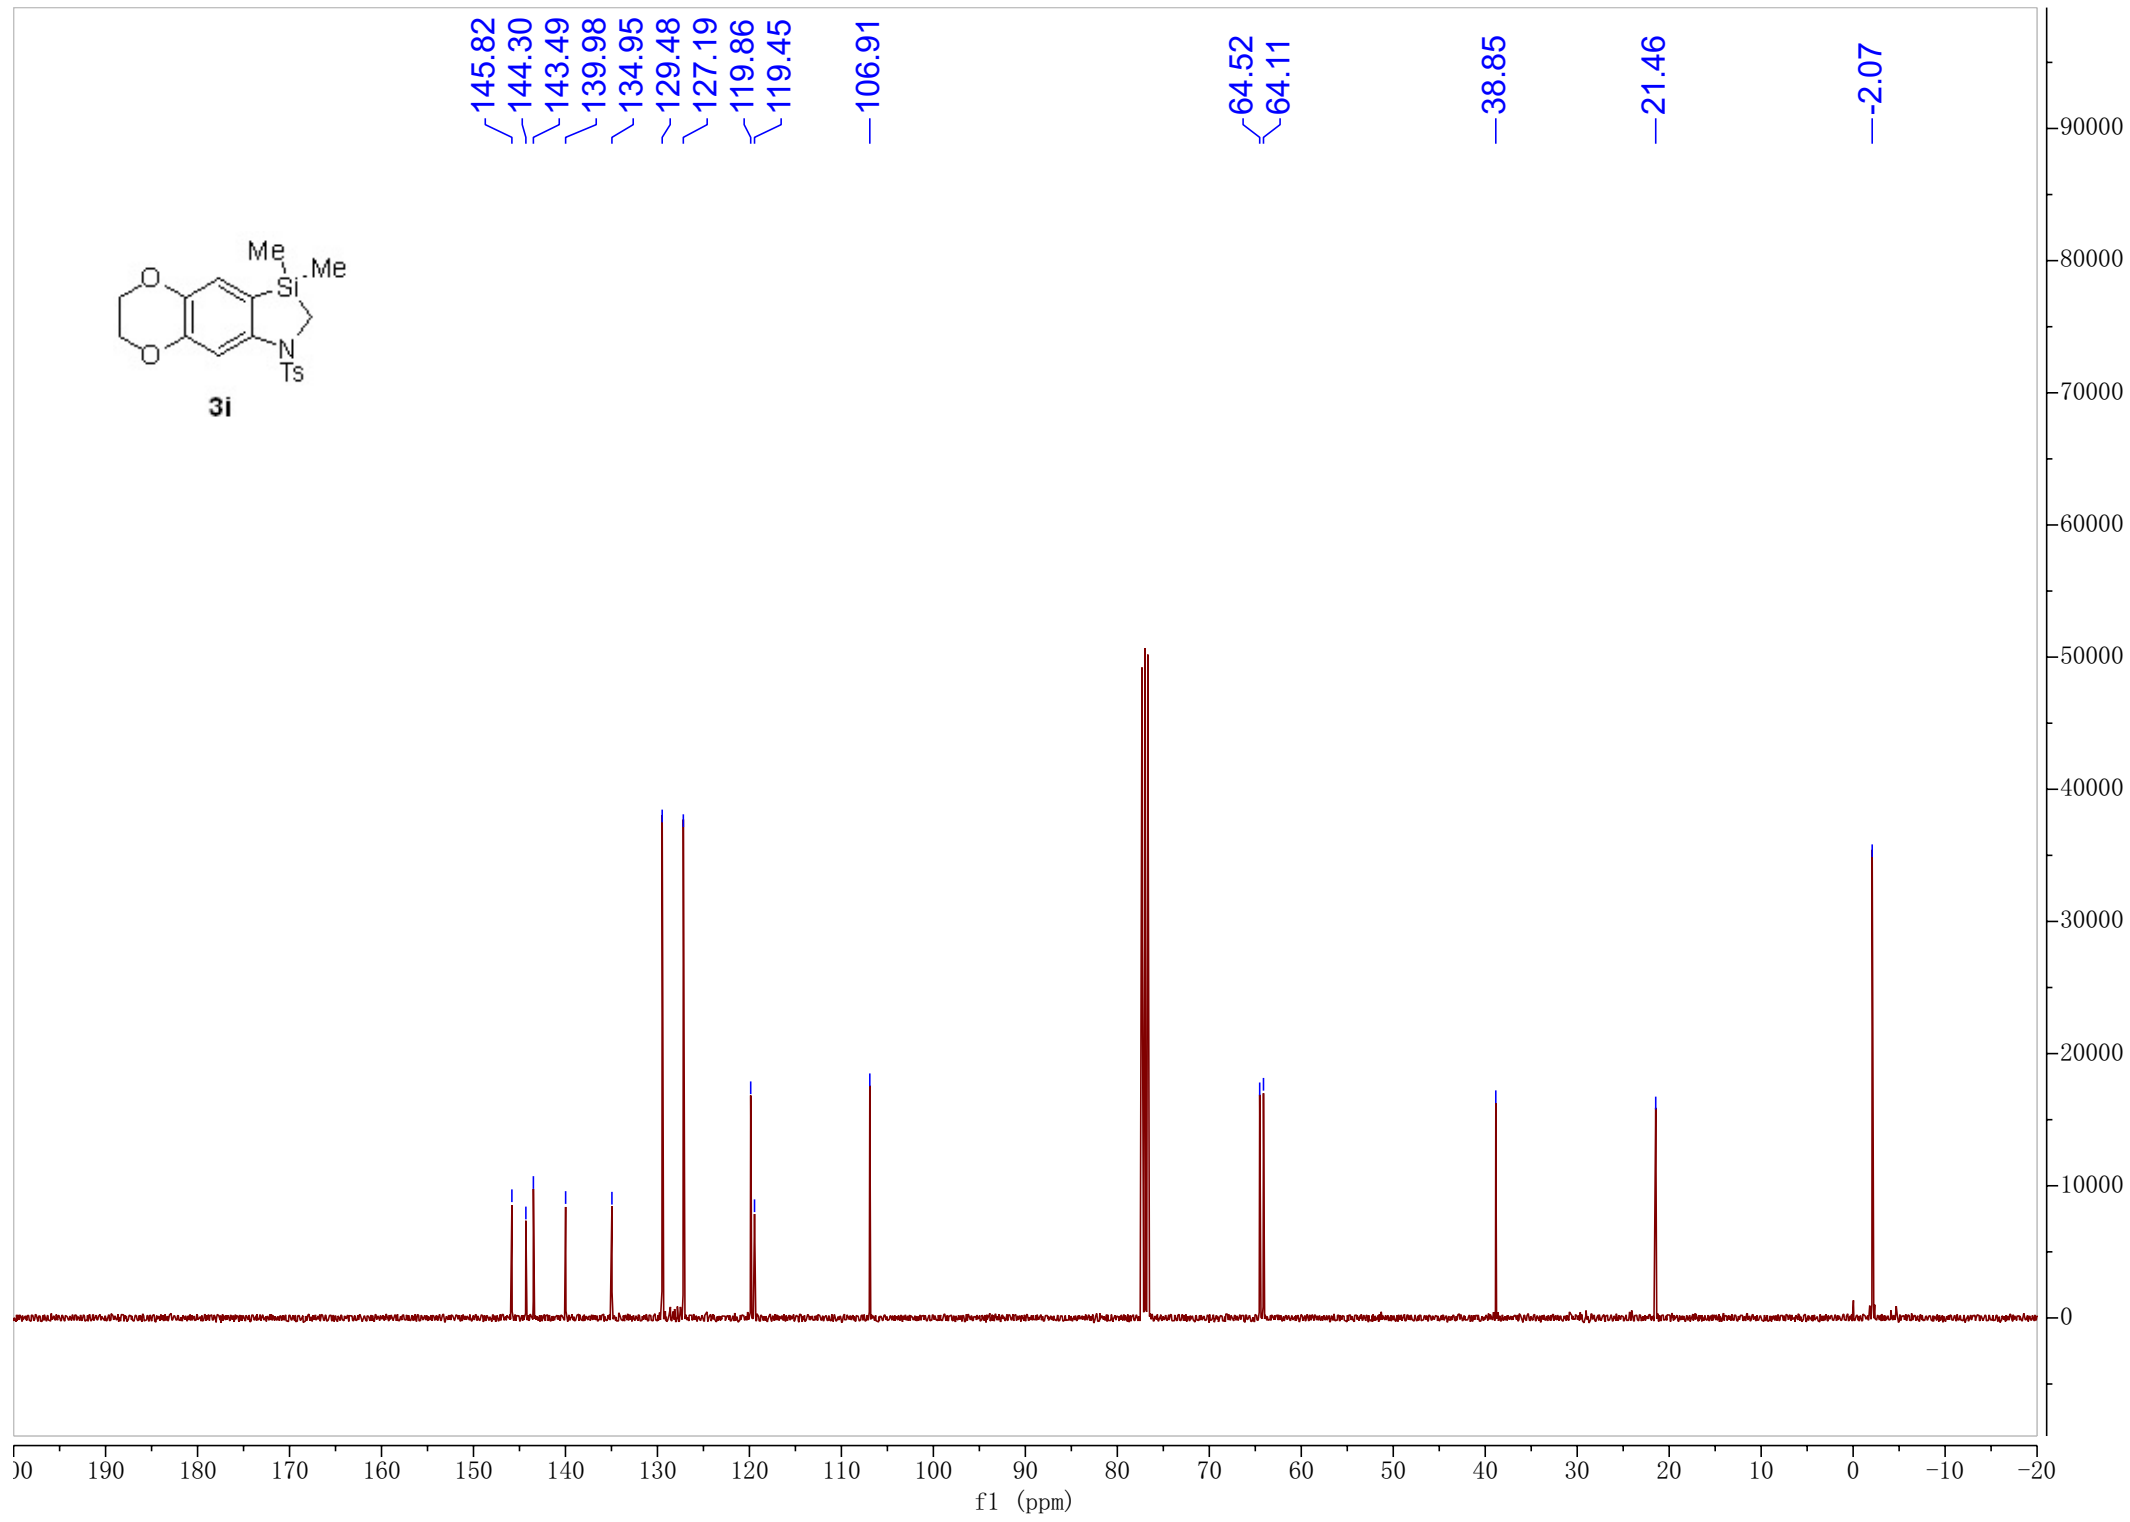

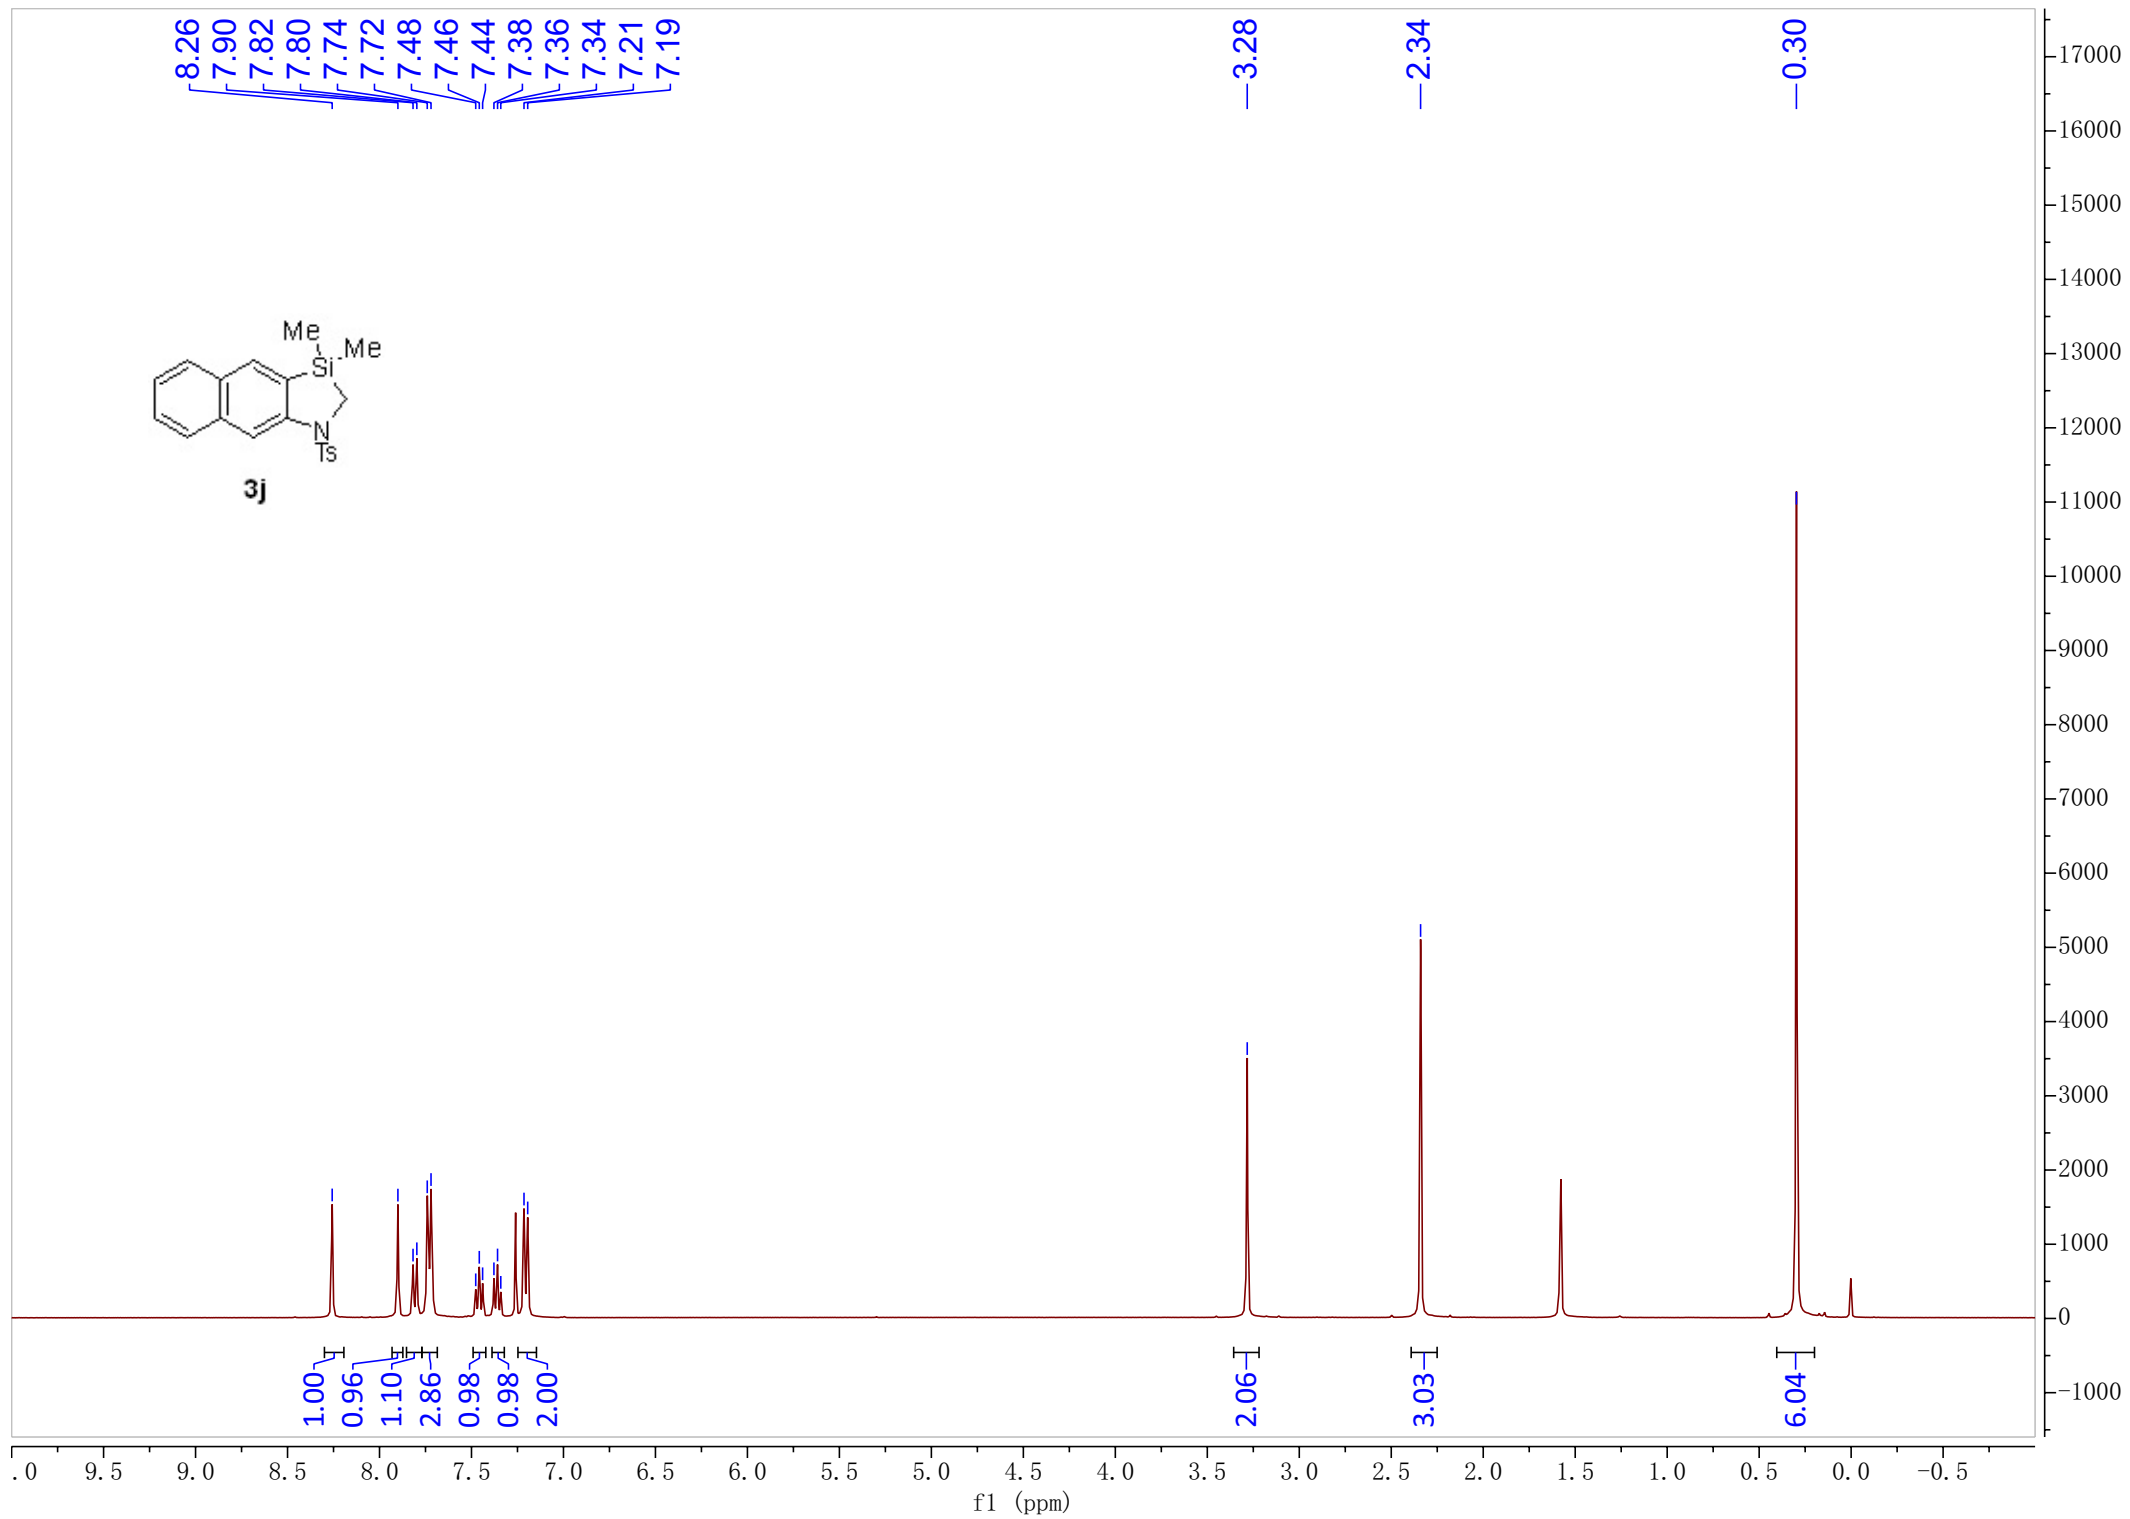

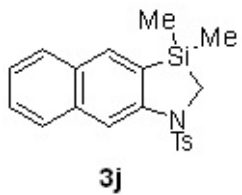

146.29  
143.72  
135.31  
135.20  
133.75  
129.87  
129.55  
128.43  
127.99  
127.52  
127.16  
127.05  
124.67  
112.87

38.73

21.46

2.29

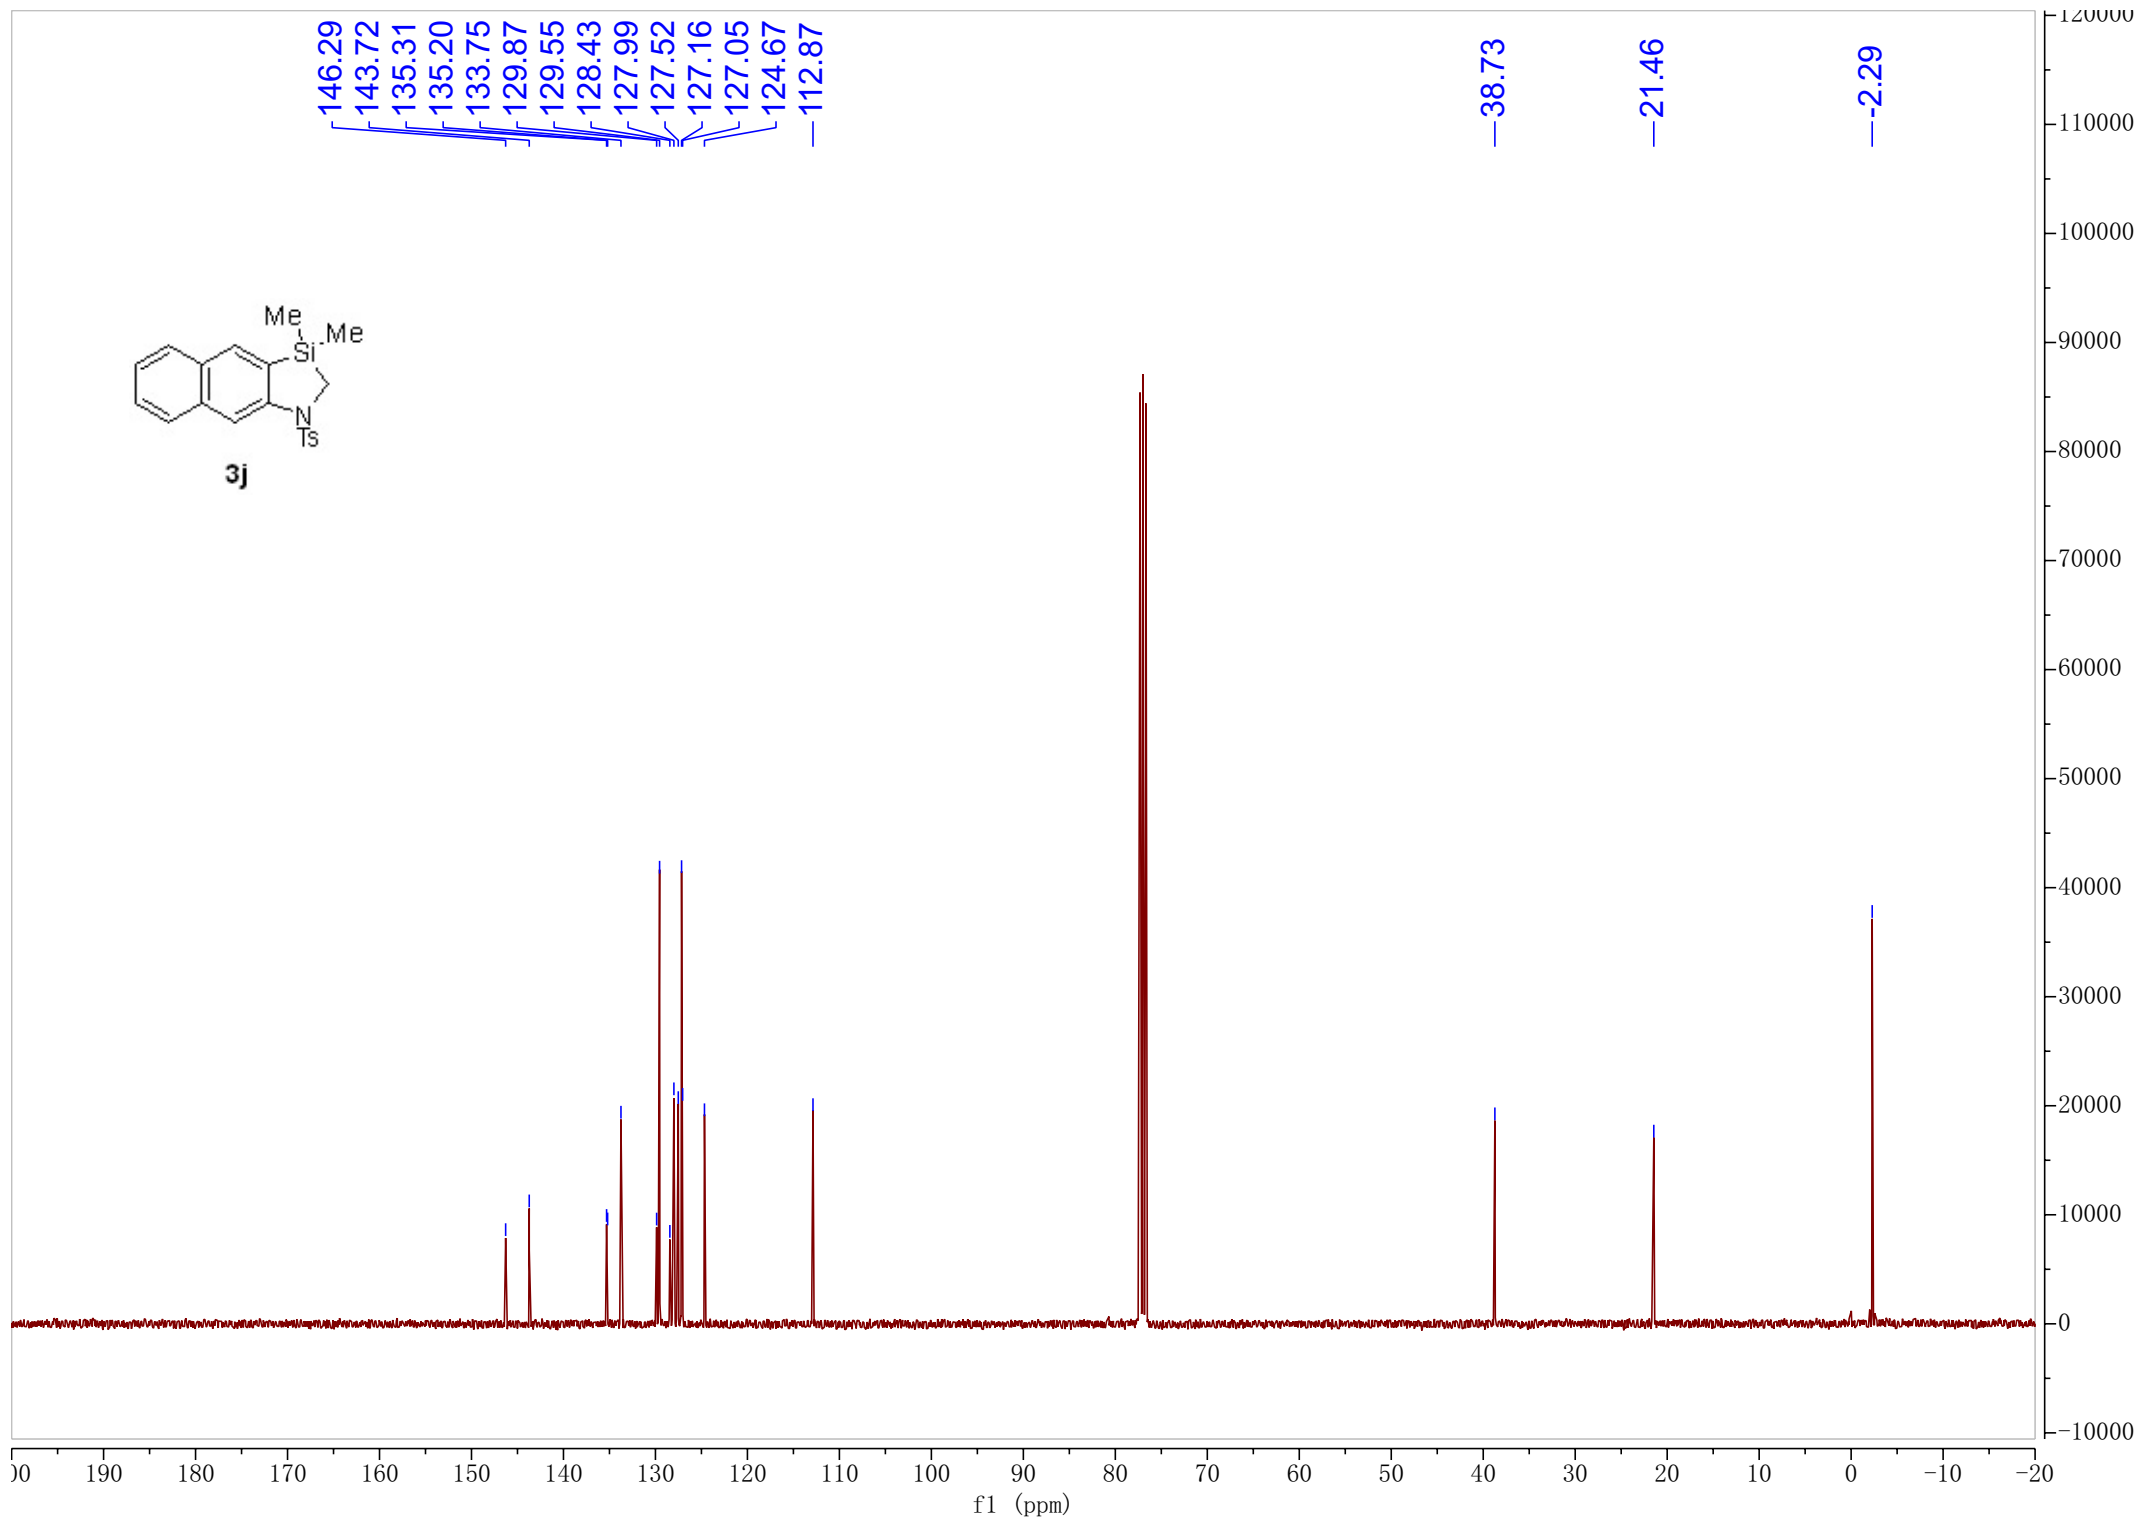

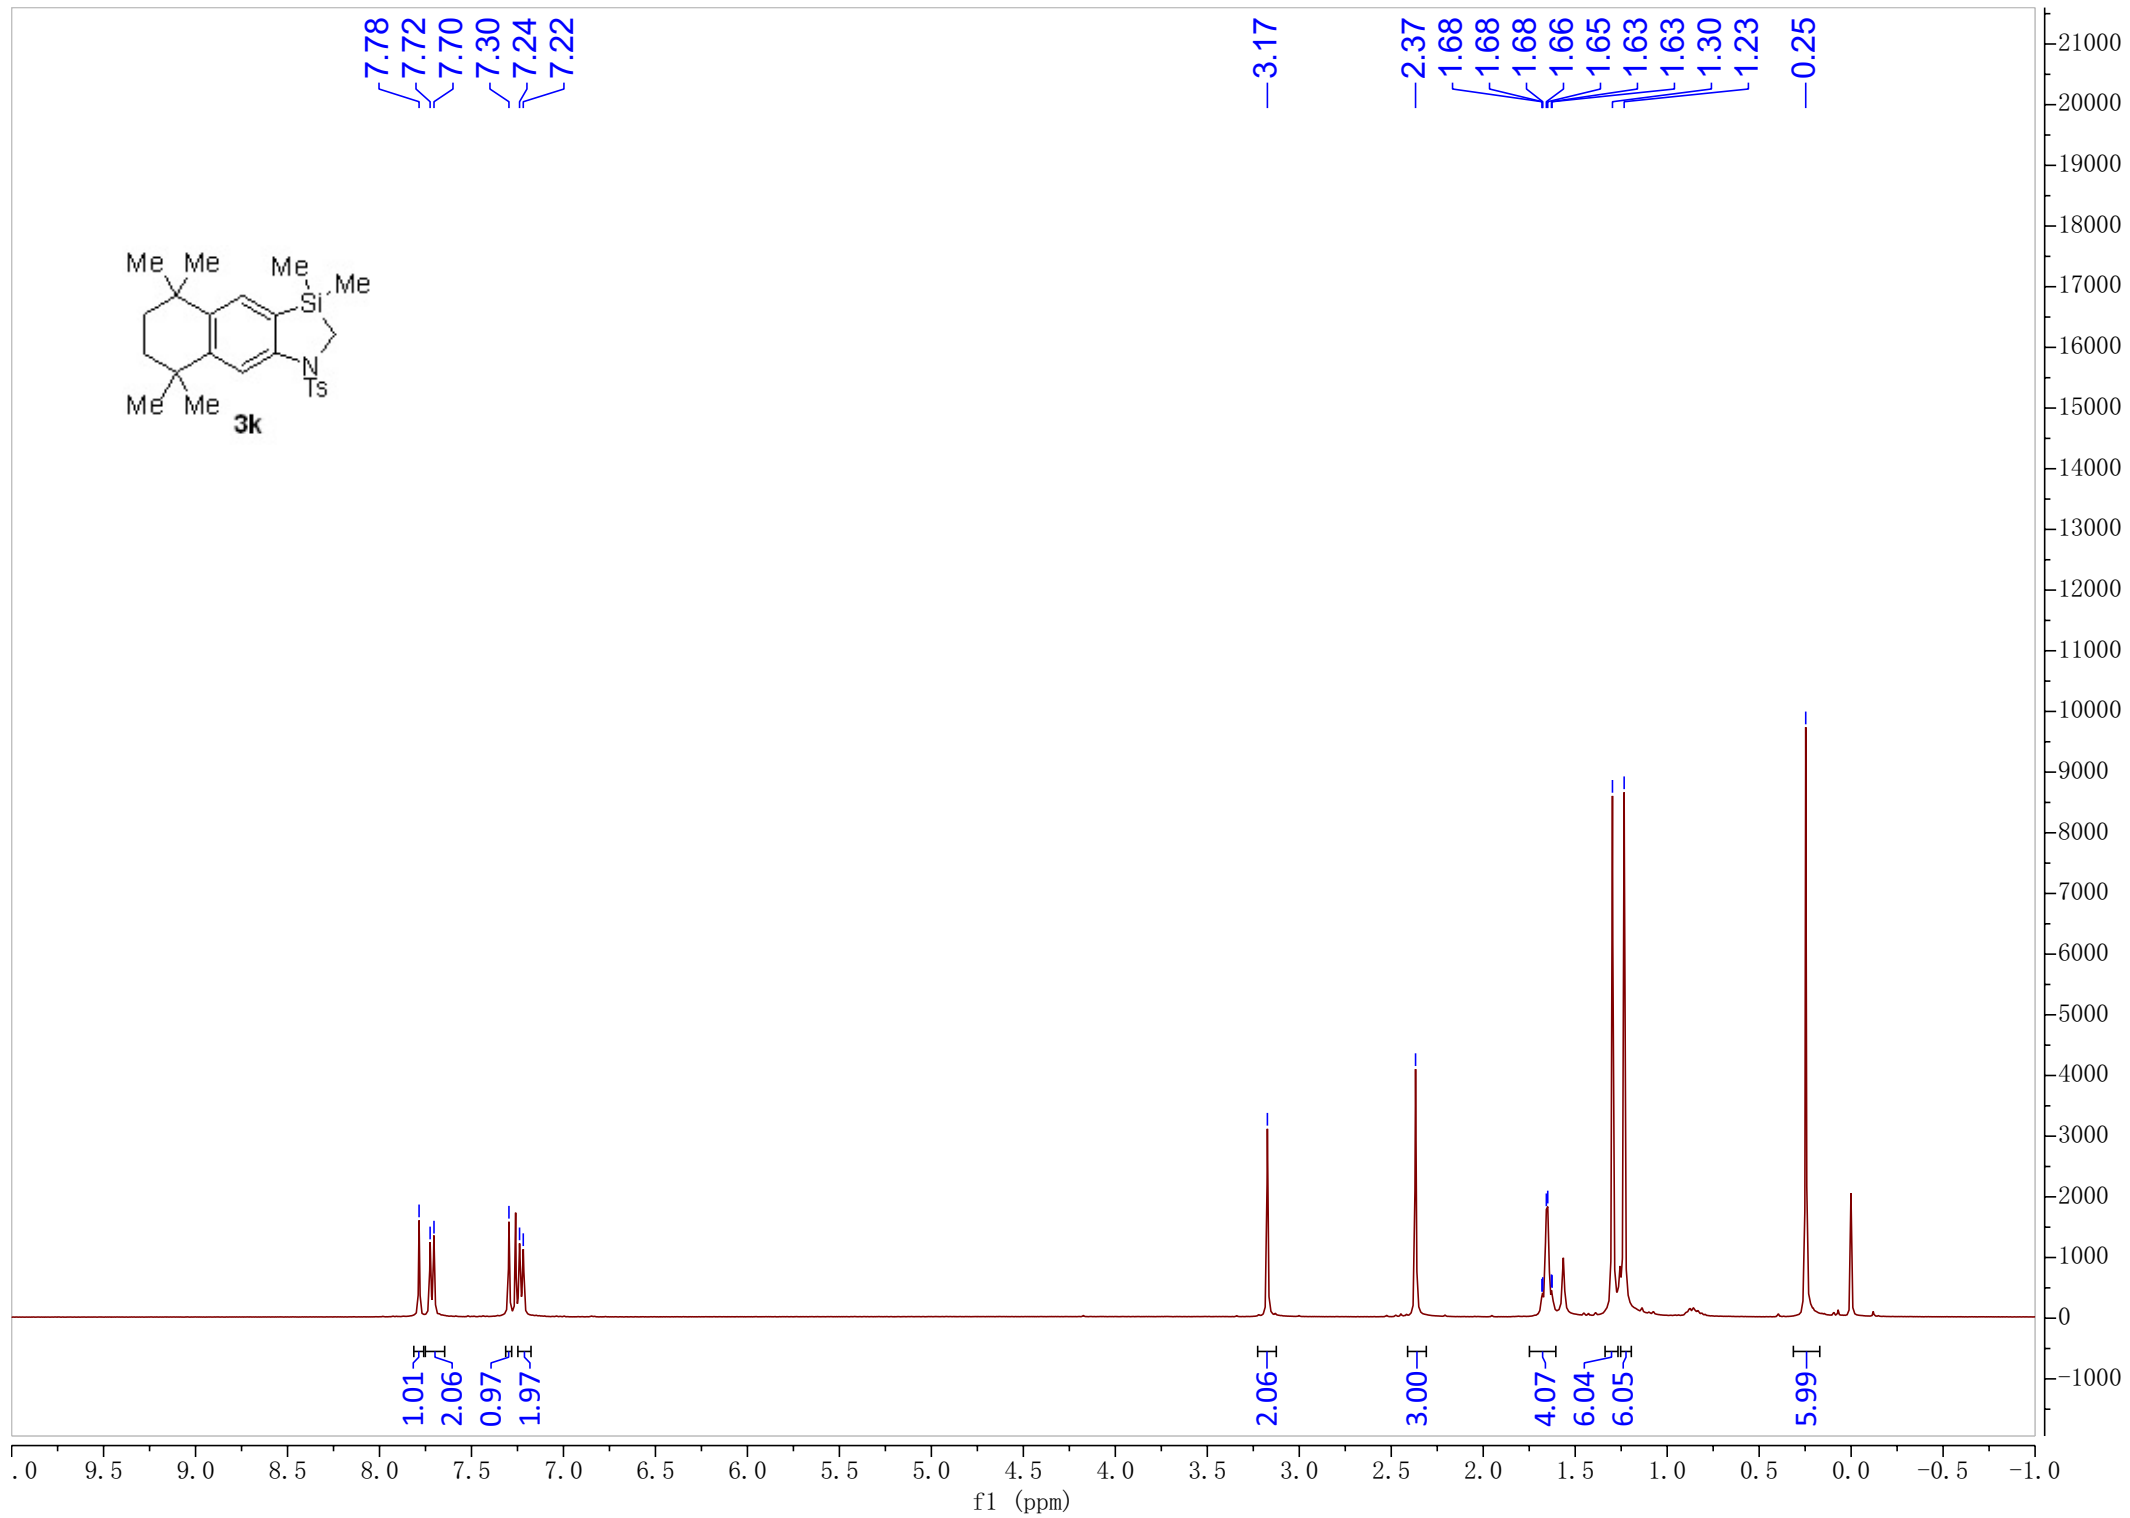

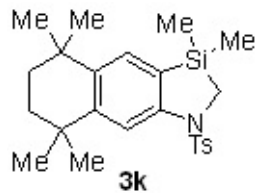

148.30  
147.70  
143.45  
139.36  
135.50  
130.68  
129.44  
127.31  
123.97  
114.16

38.63  
35.10  
35.00  
34.93  
33.81  
31.89  
31.79  
21.47

-2.00

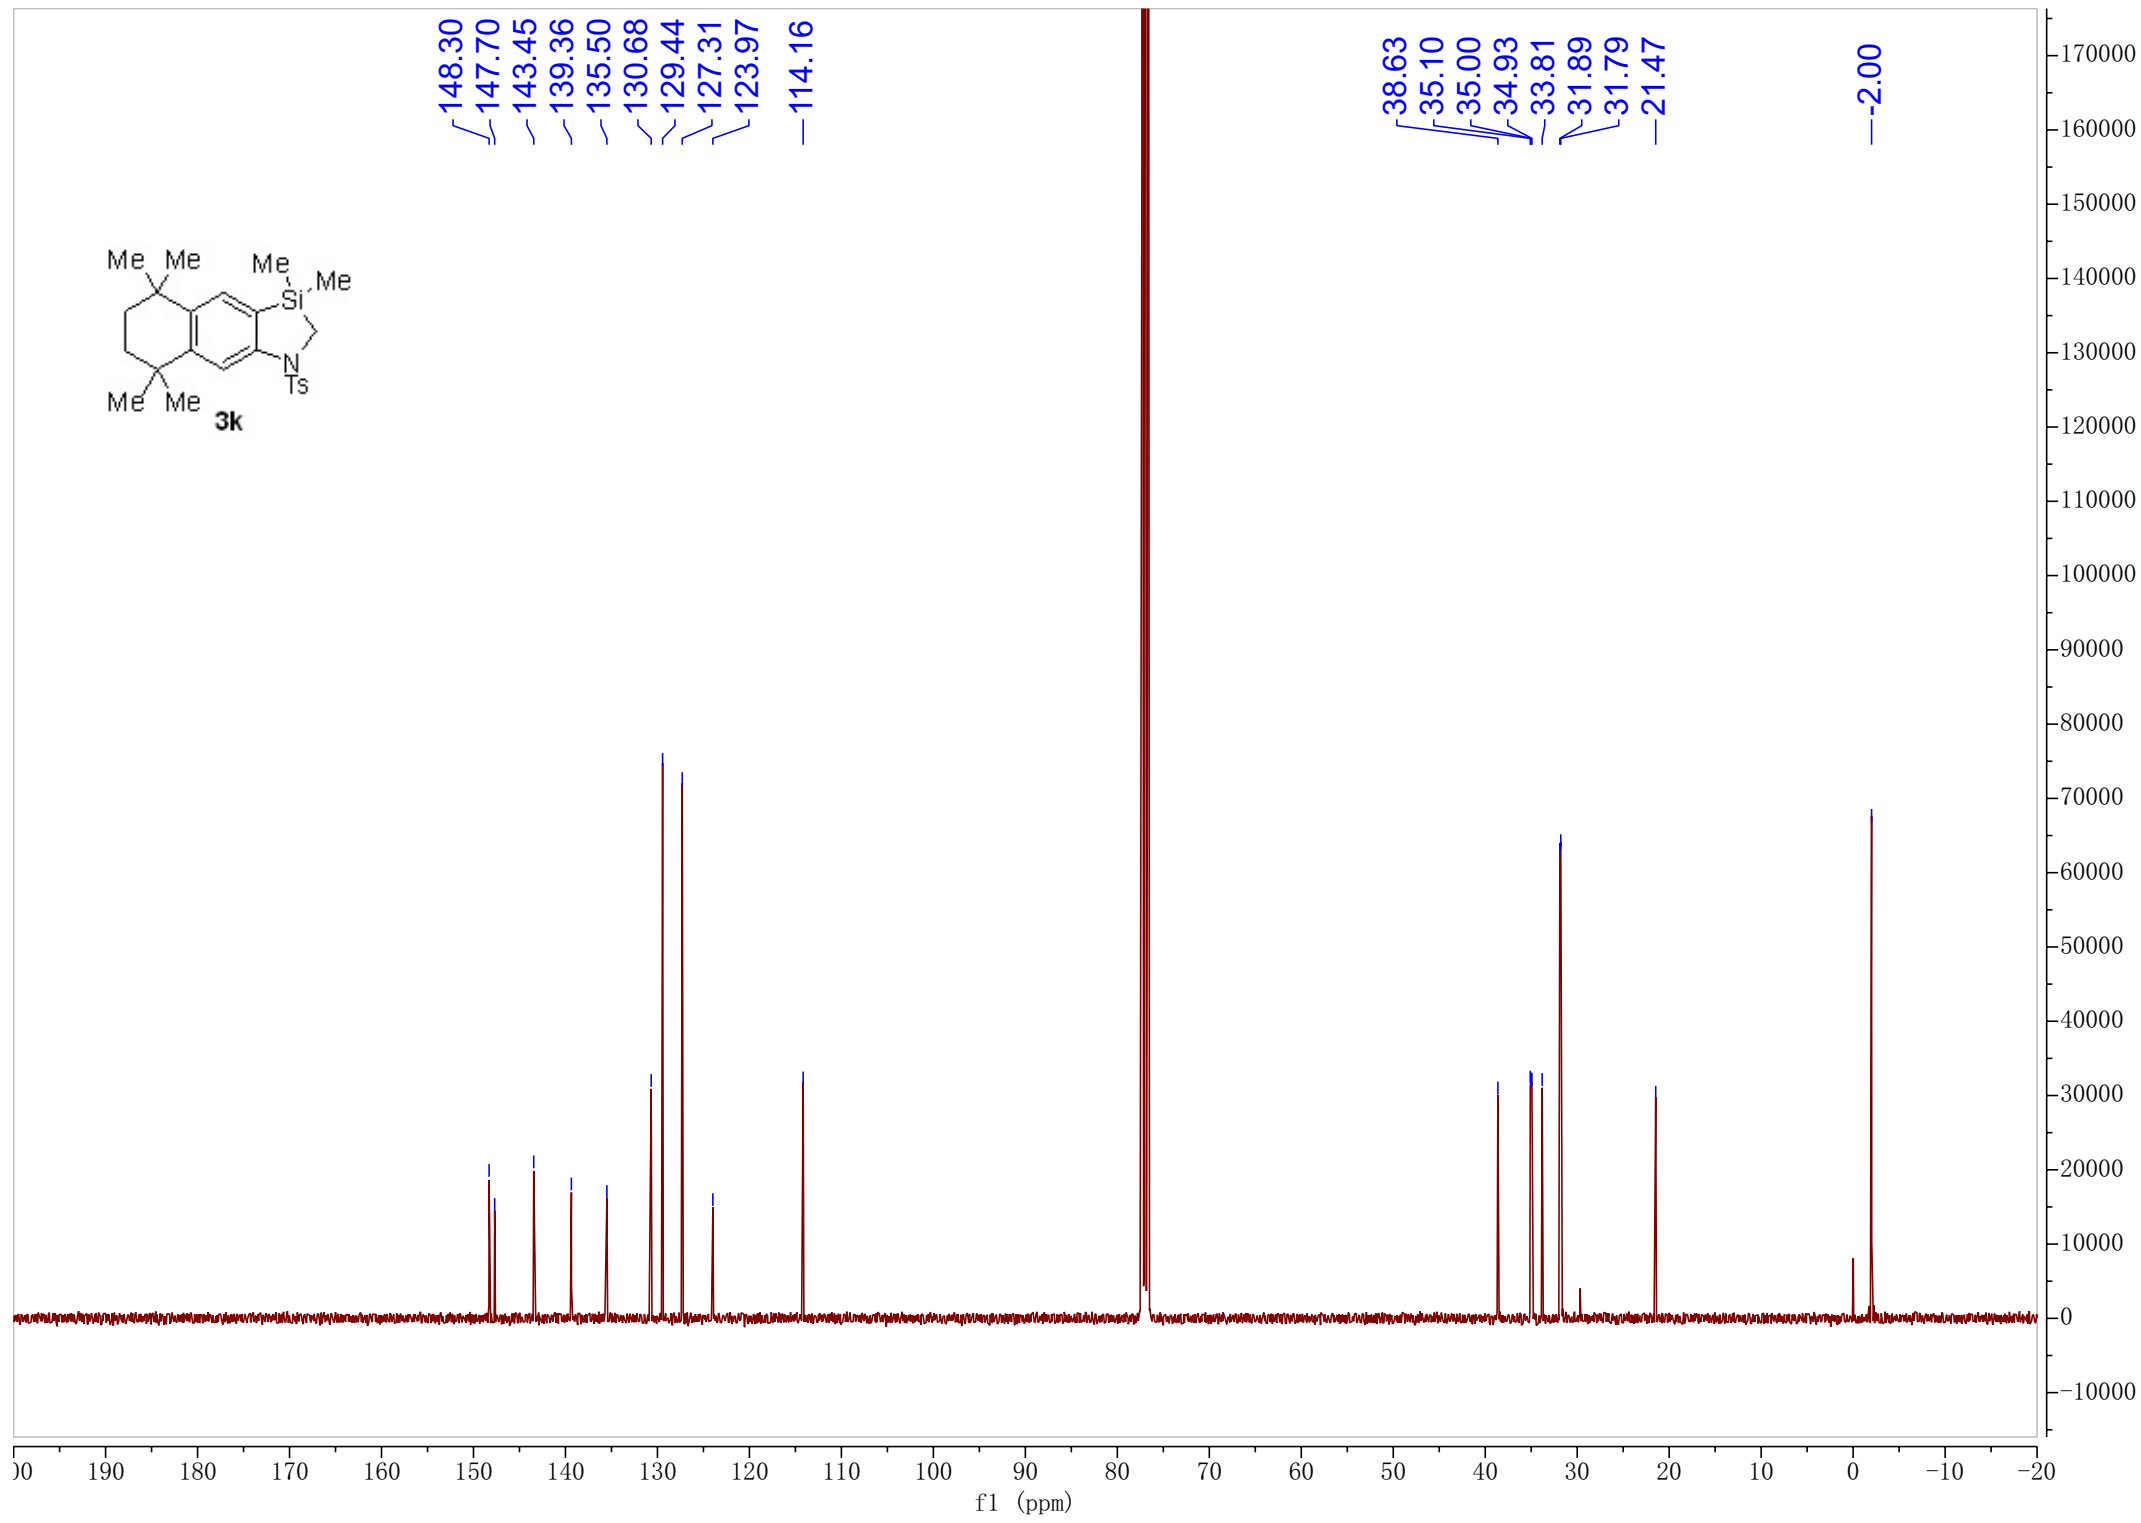

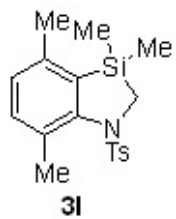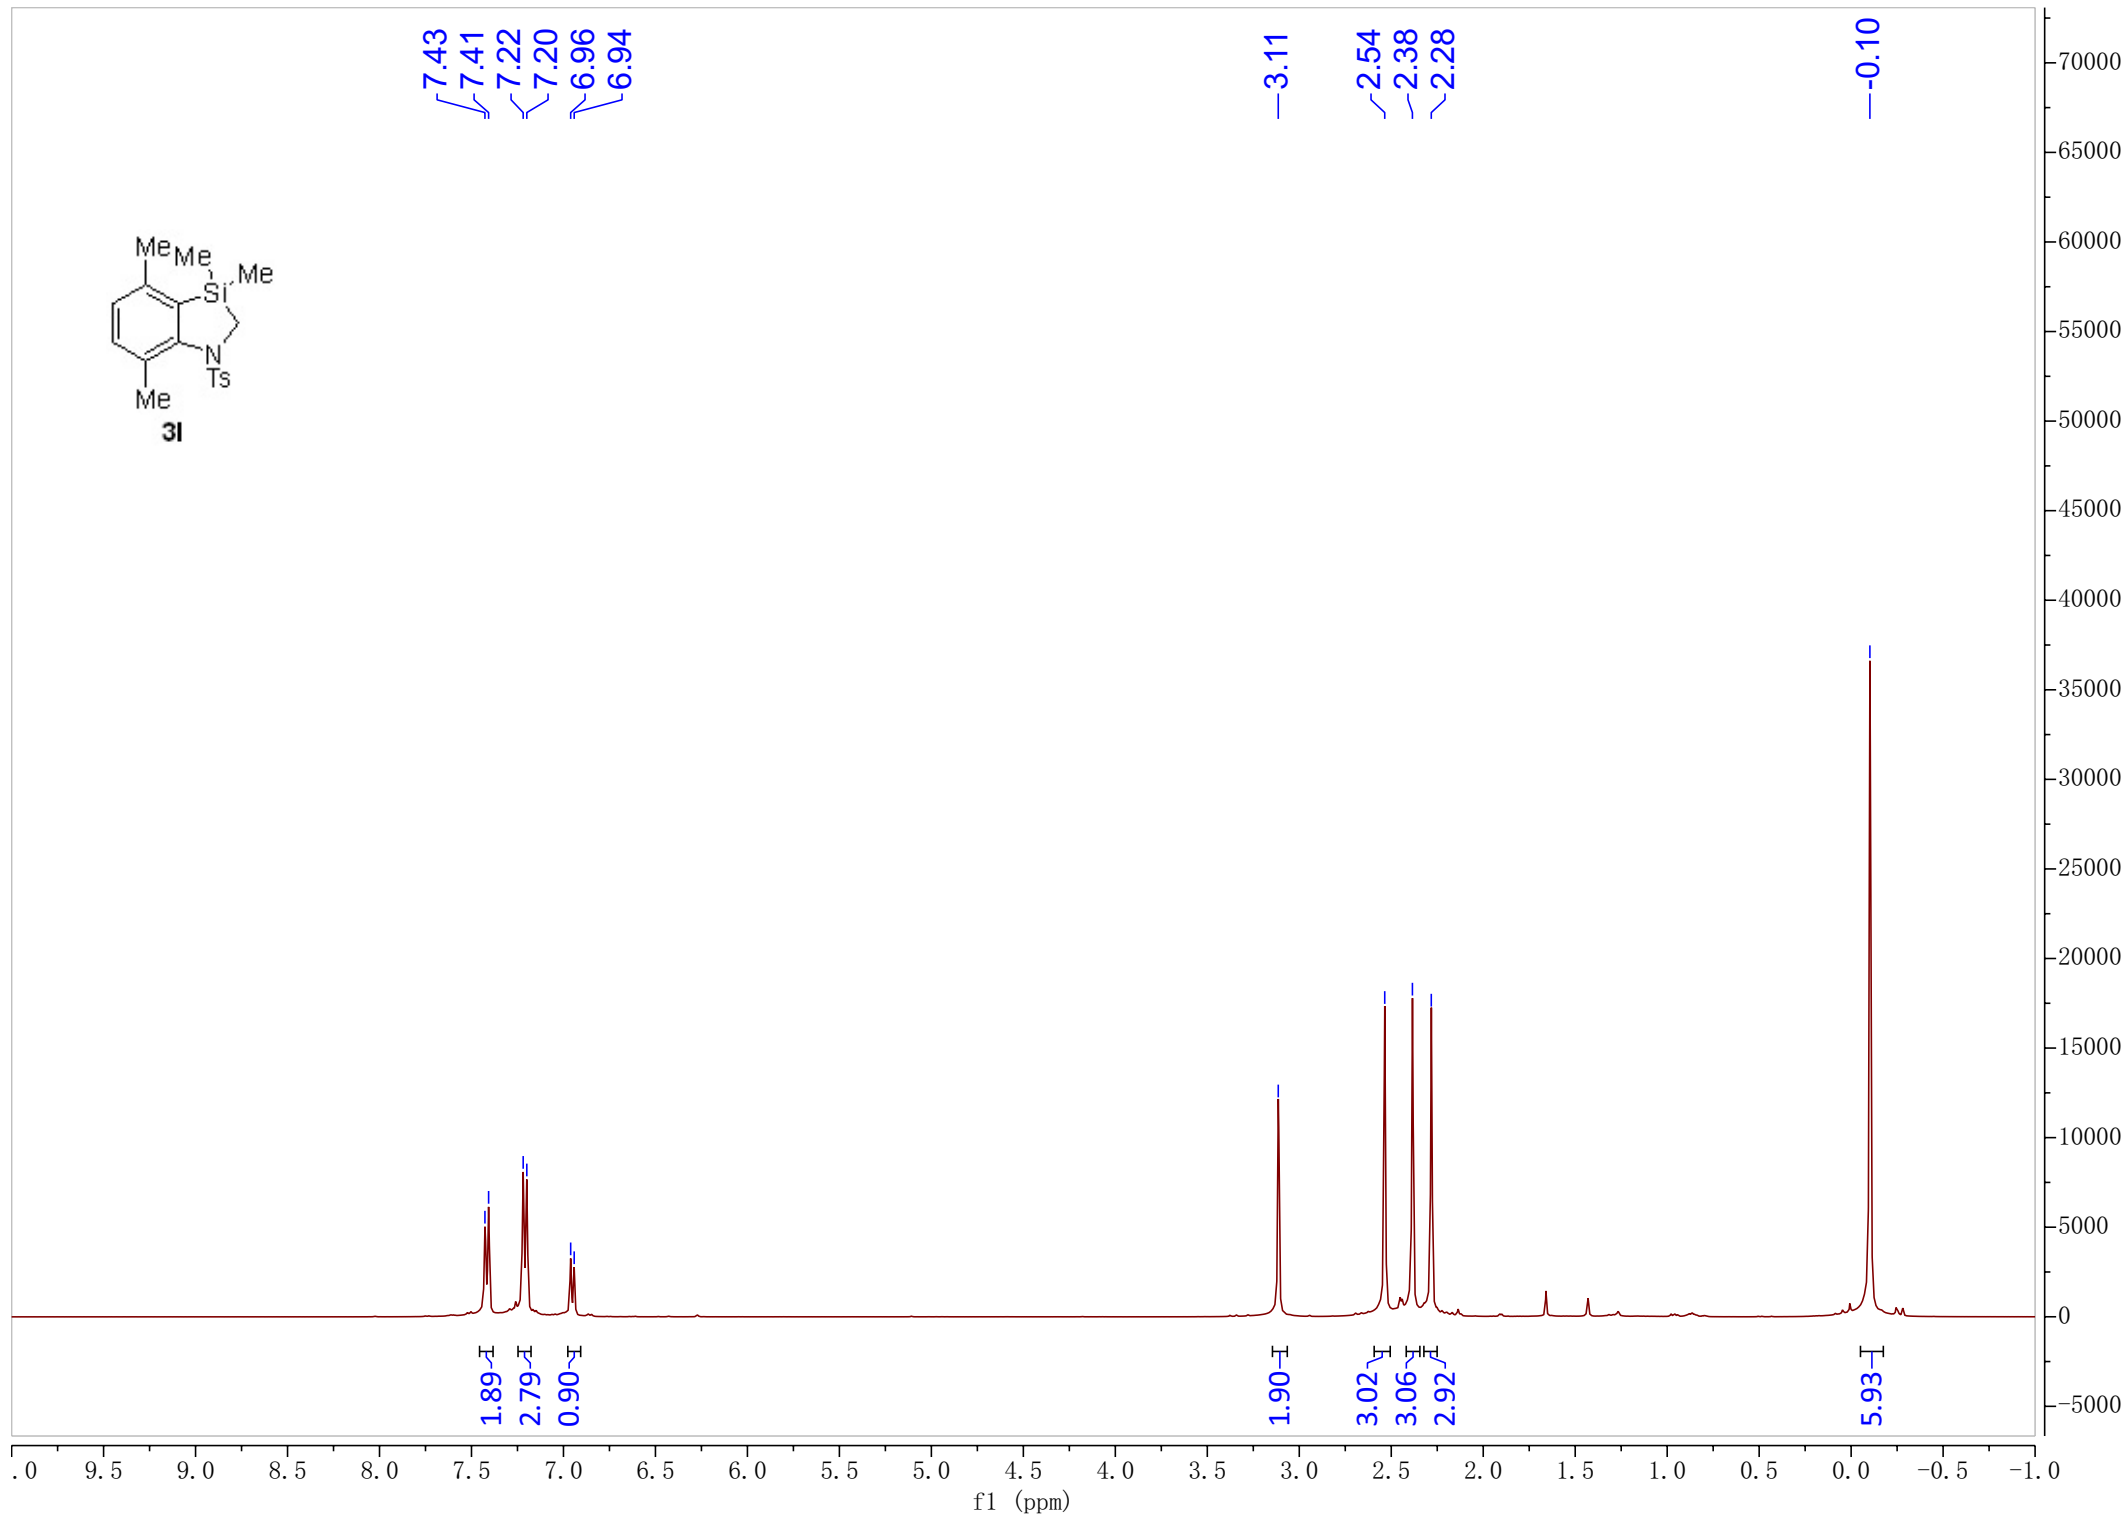

148.98  
 143.61  
 139.84  
 134.70  
 133.91  
 133.28  
 131.50  
 129.26  
 128.53  
 126.92

40.26  
 21.68  
 21.39  
 20.58  
 -2.84

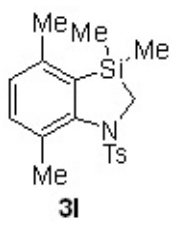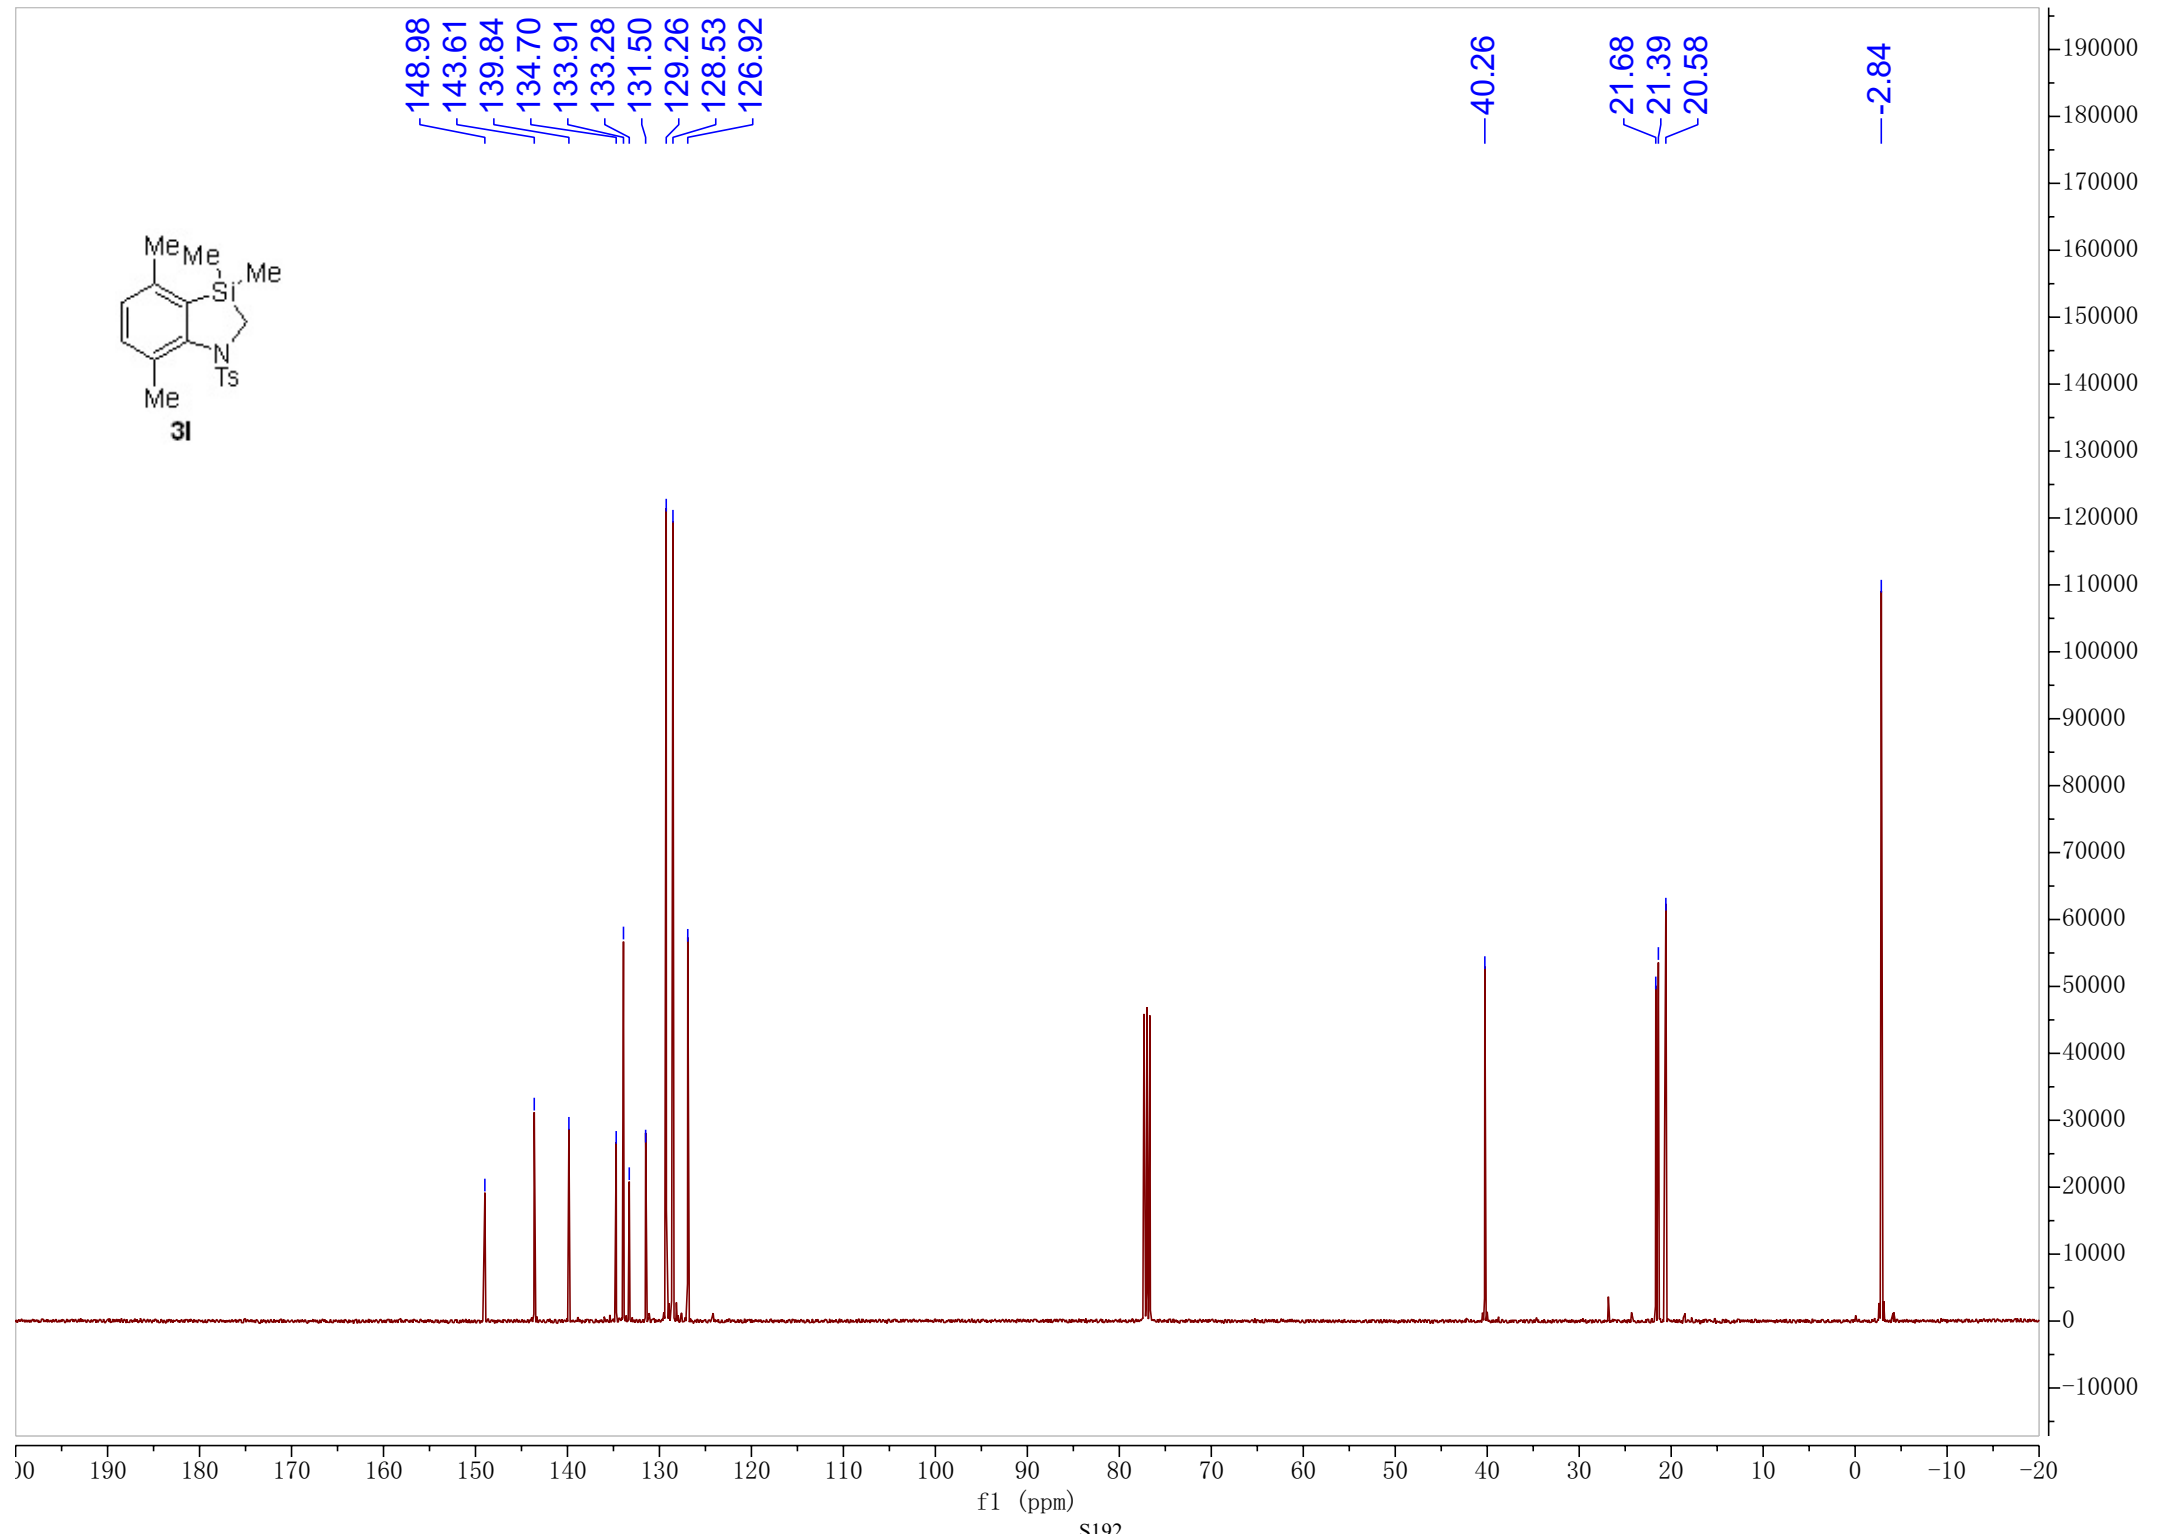



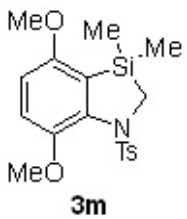

7.74  
7.72  
7.28  
6.89  
6.87  
6.57  
6.54

3.75  
3.63  
3.37

2.41

-0.26

1.93

1.90

1.08

1.03

3.26

3.00

2.20

3.35

5.85

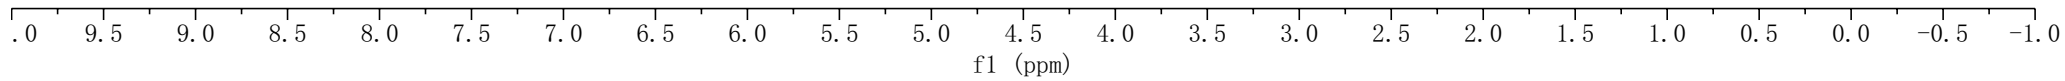

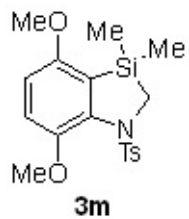

157.22  
146.66  
142.59  
140.26  
138.92  
129.06  
126.97  
121.15  
116.85  
107.01  
56.21  
55.74  
41.55  
21.46  
-3.19

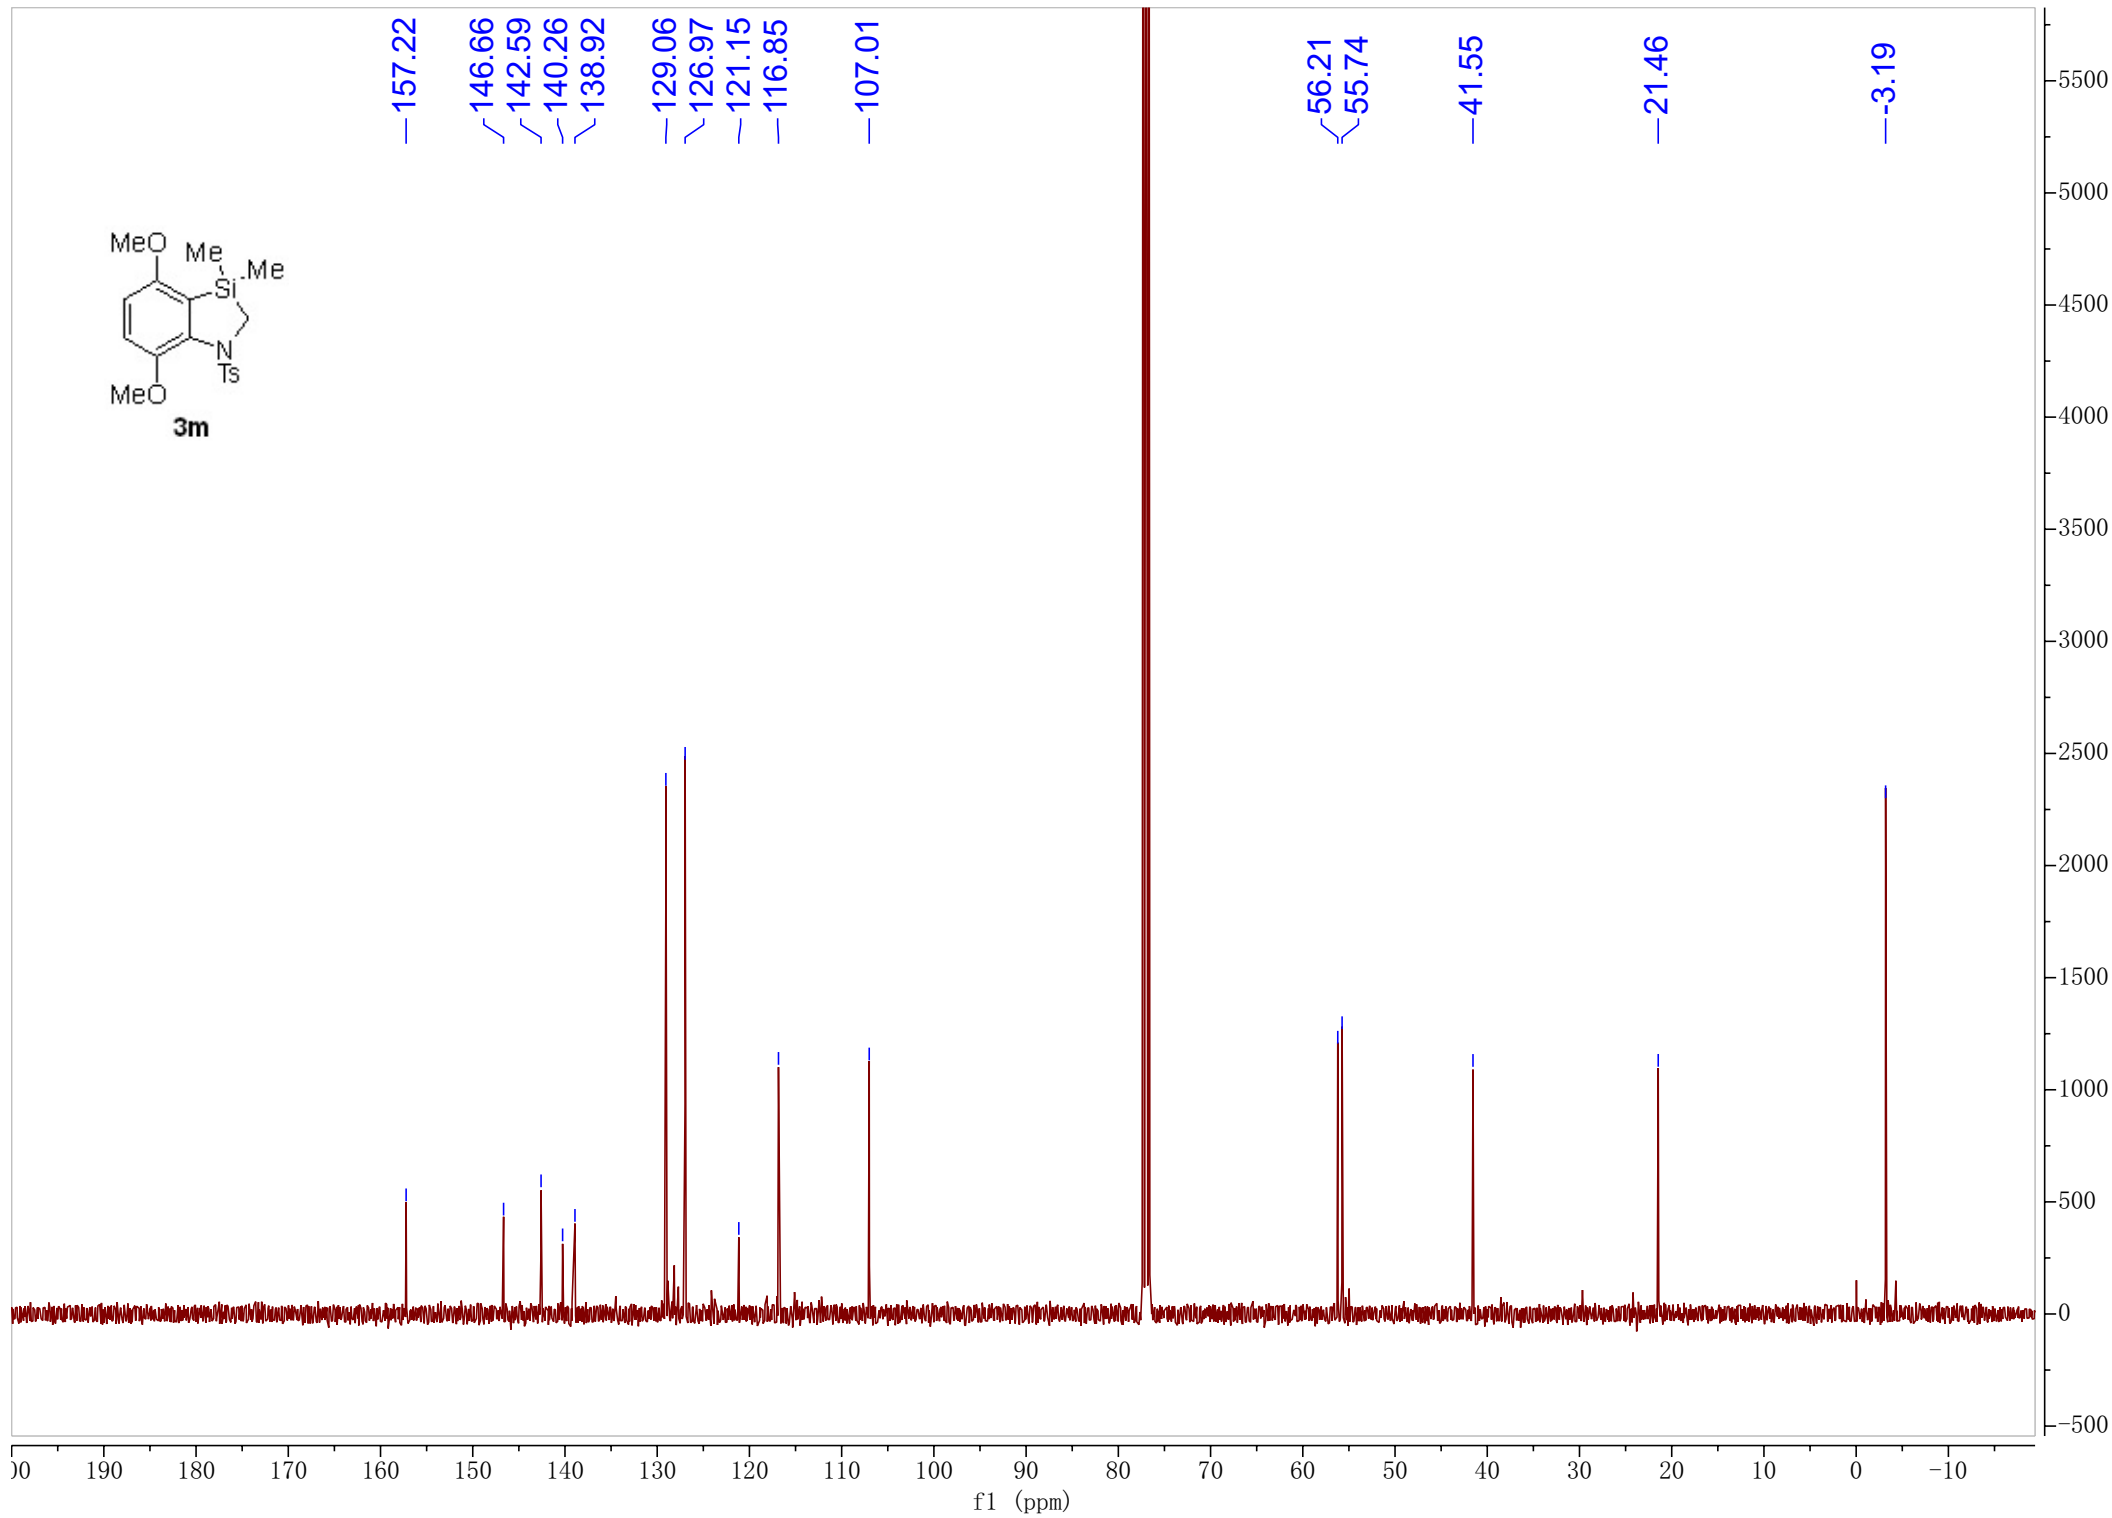

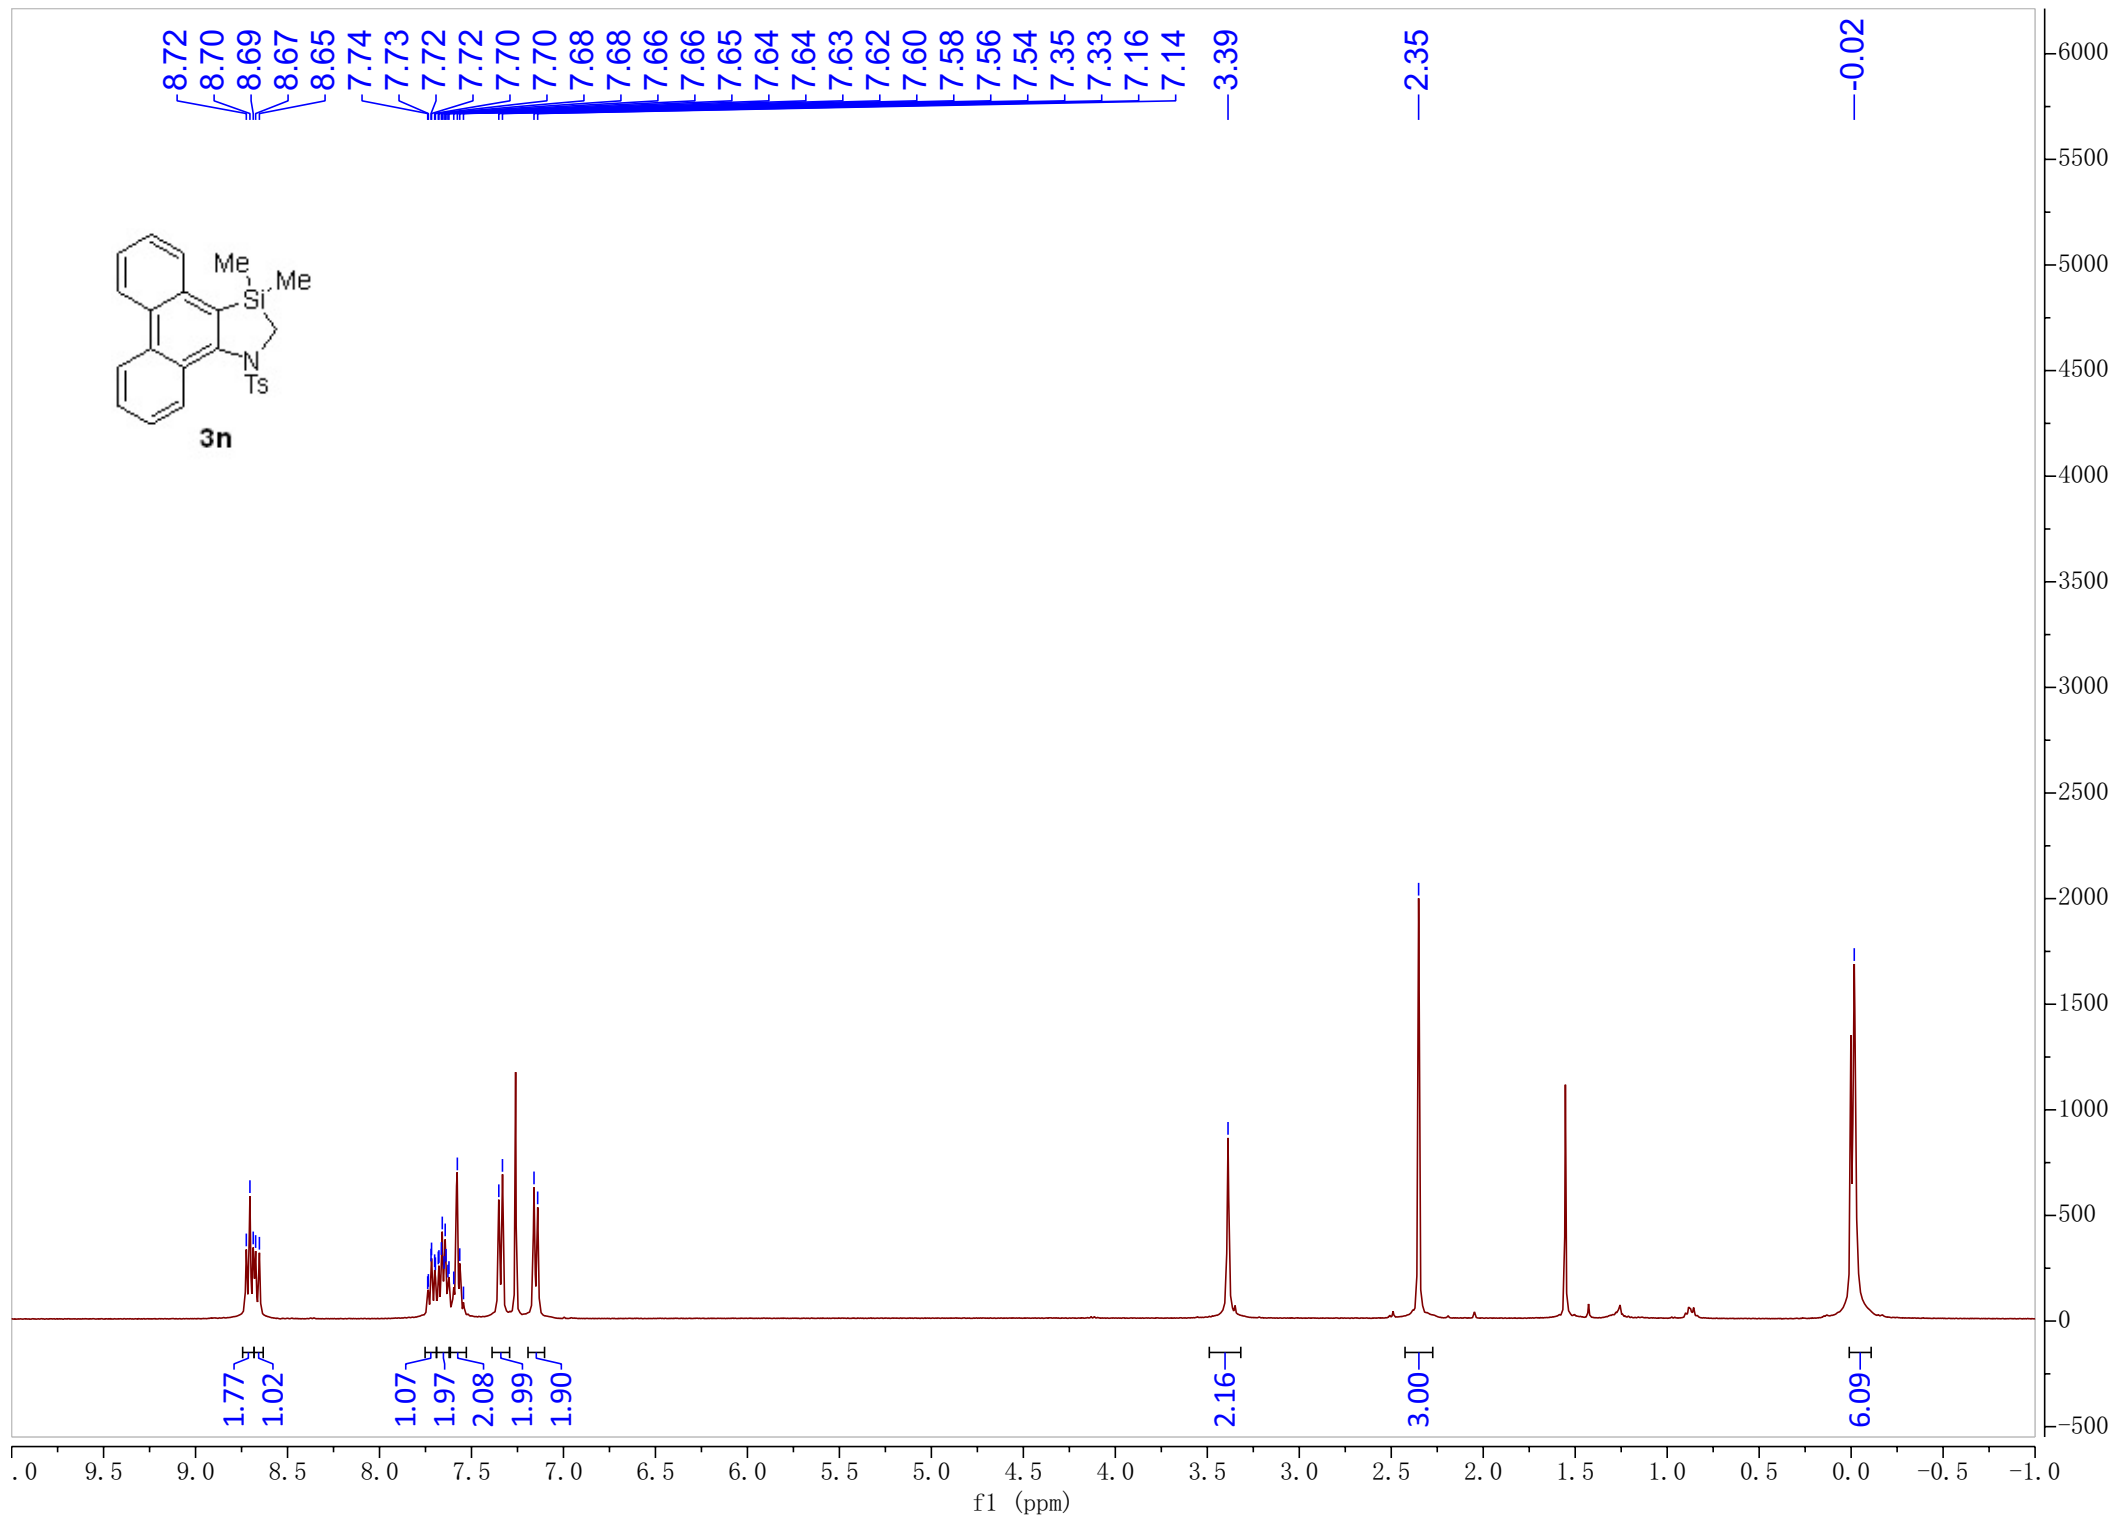

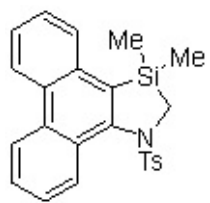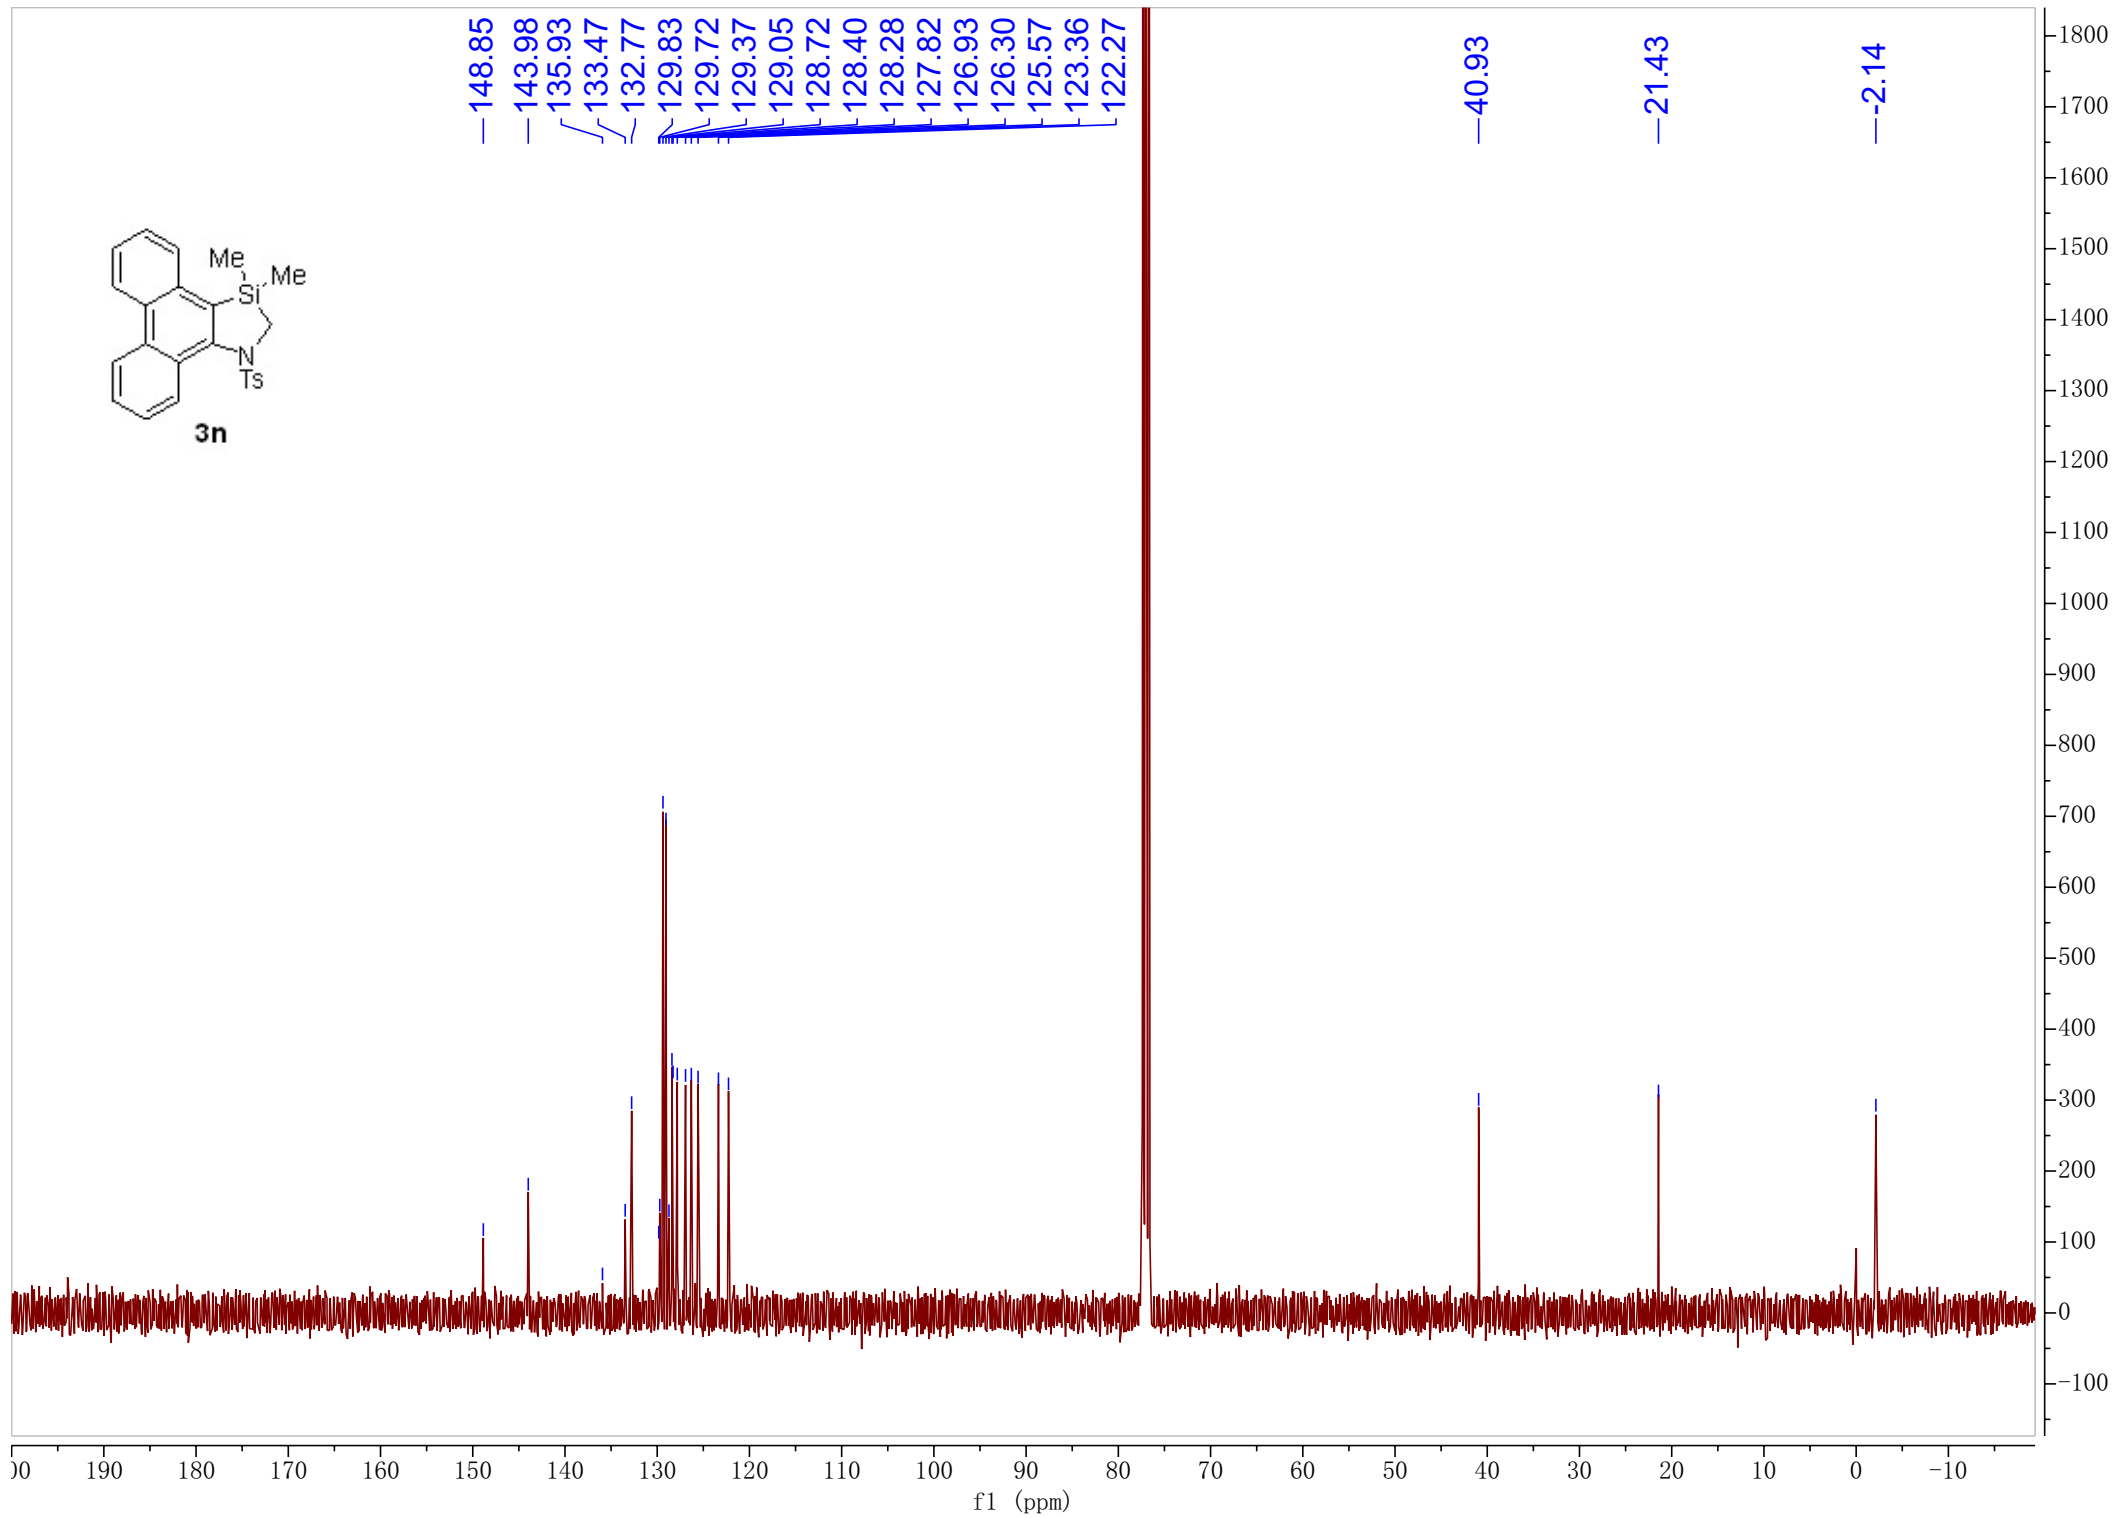

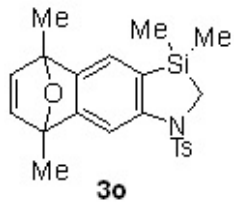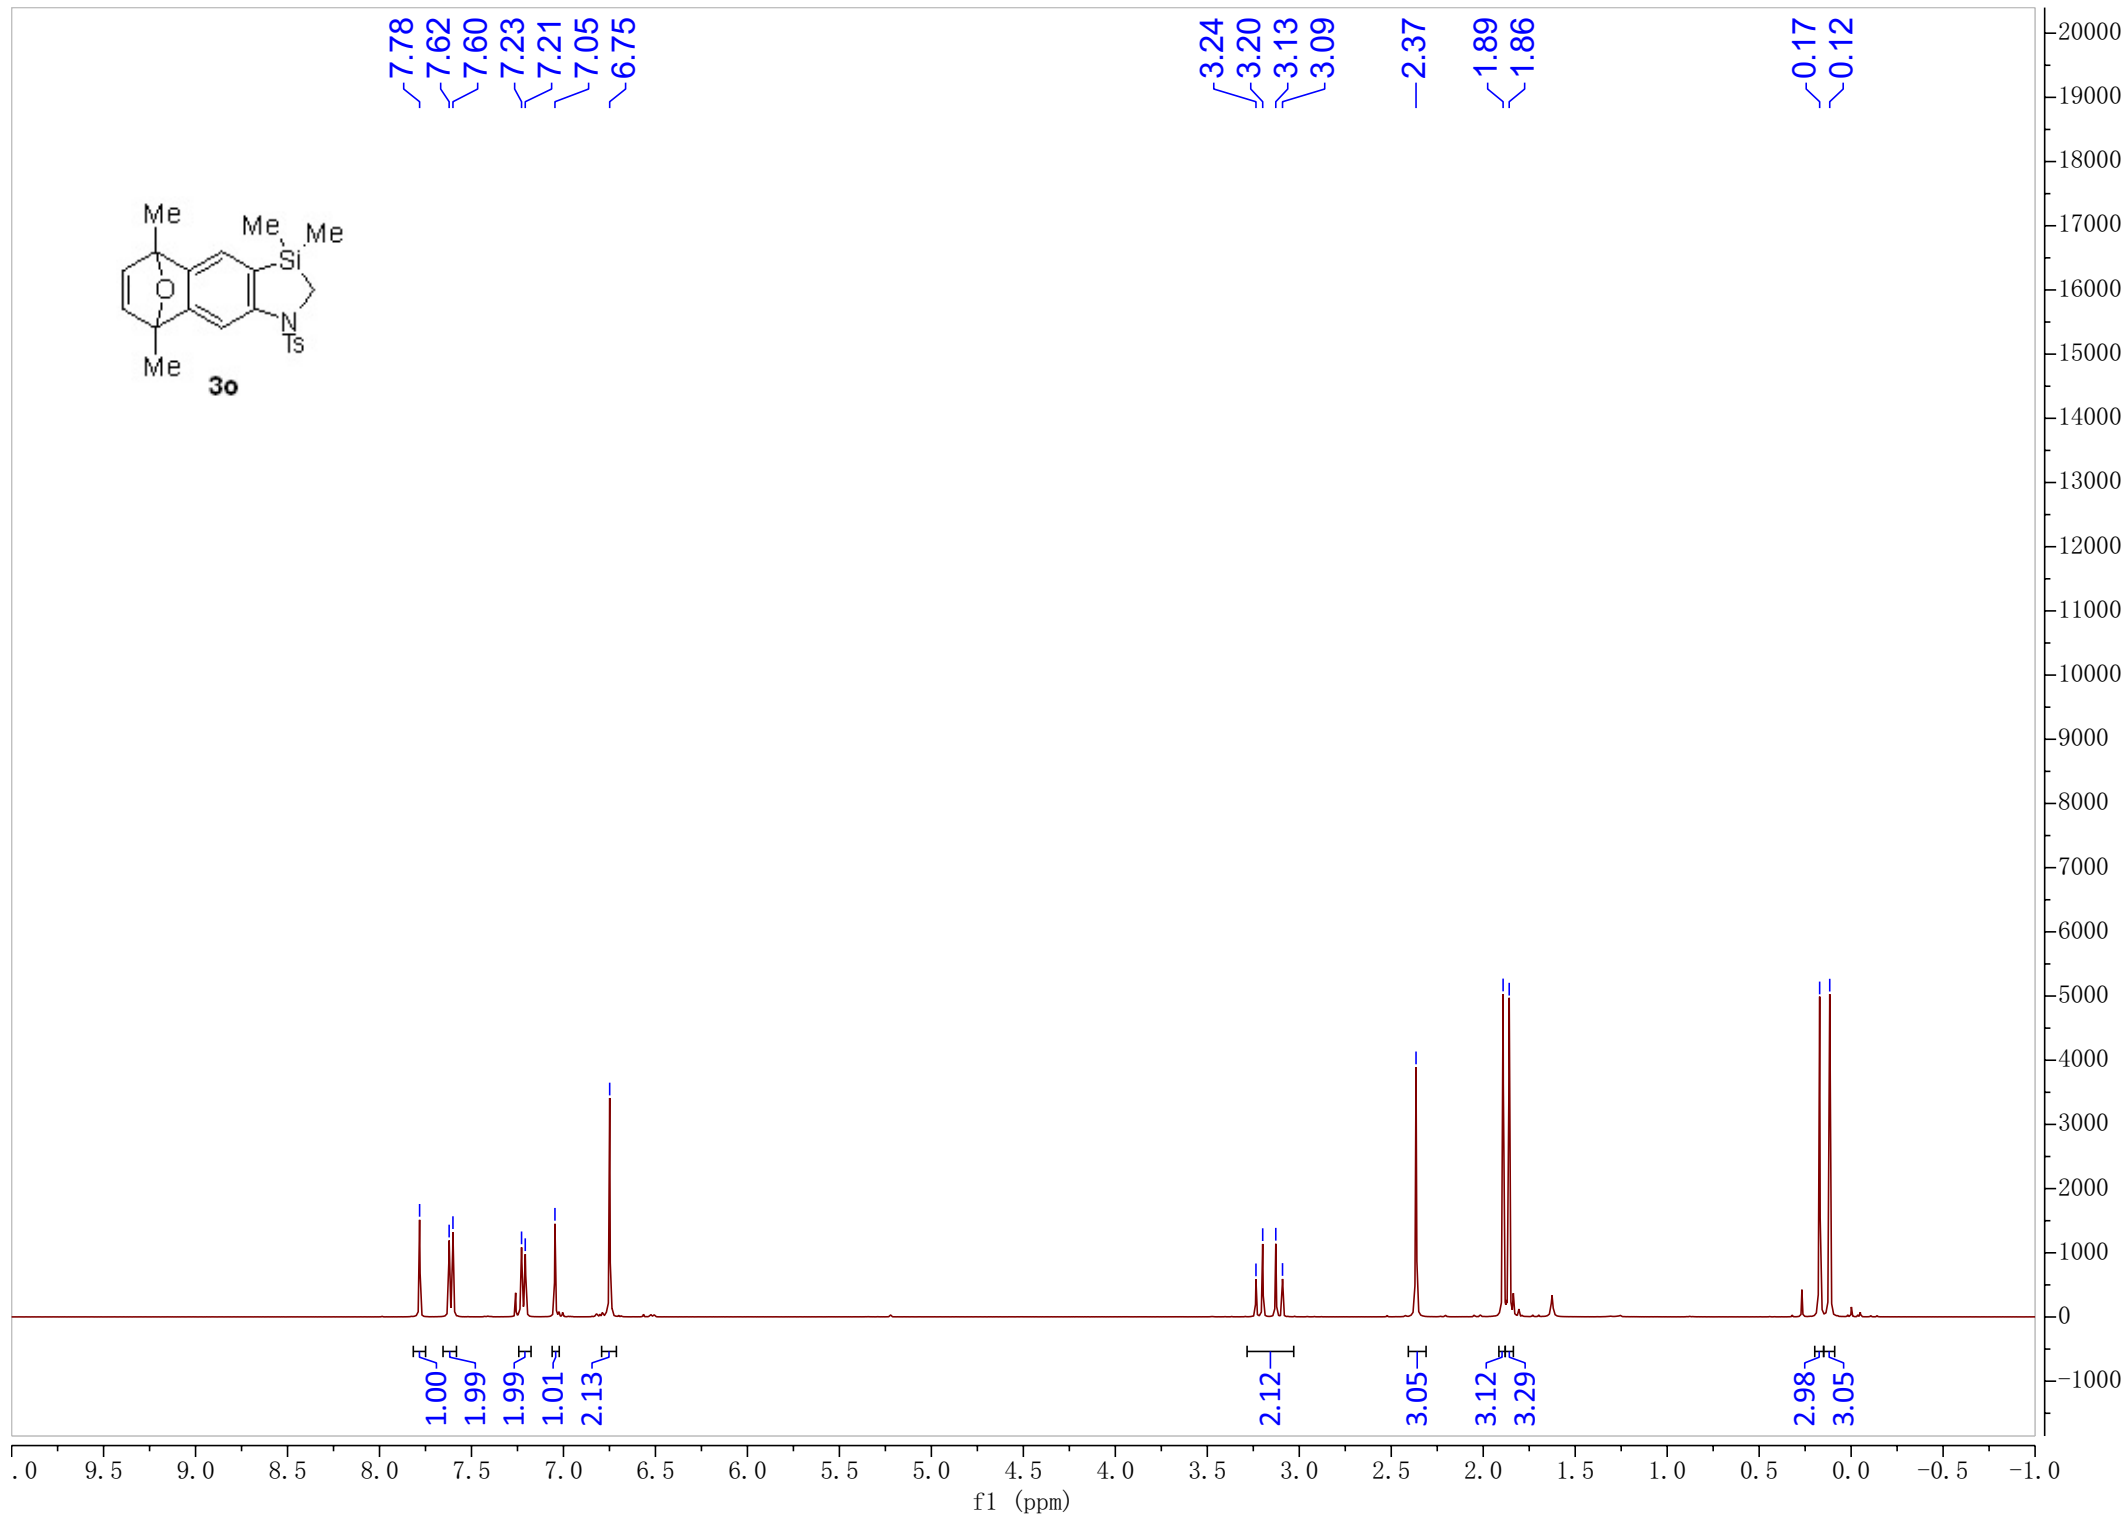

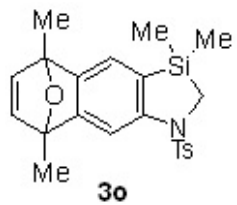

157.13  
148.50  
147.21  
146.69  
146.00  
143.65  
135.04  
129.52  
127.11  
122.15  
120.89  
-109.77  
88.71  
88.21  
-39.21  
21.44  
15.22  
15.21  
-2.00  
-2.11

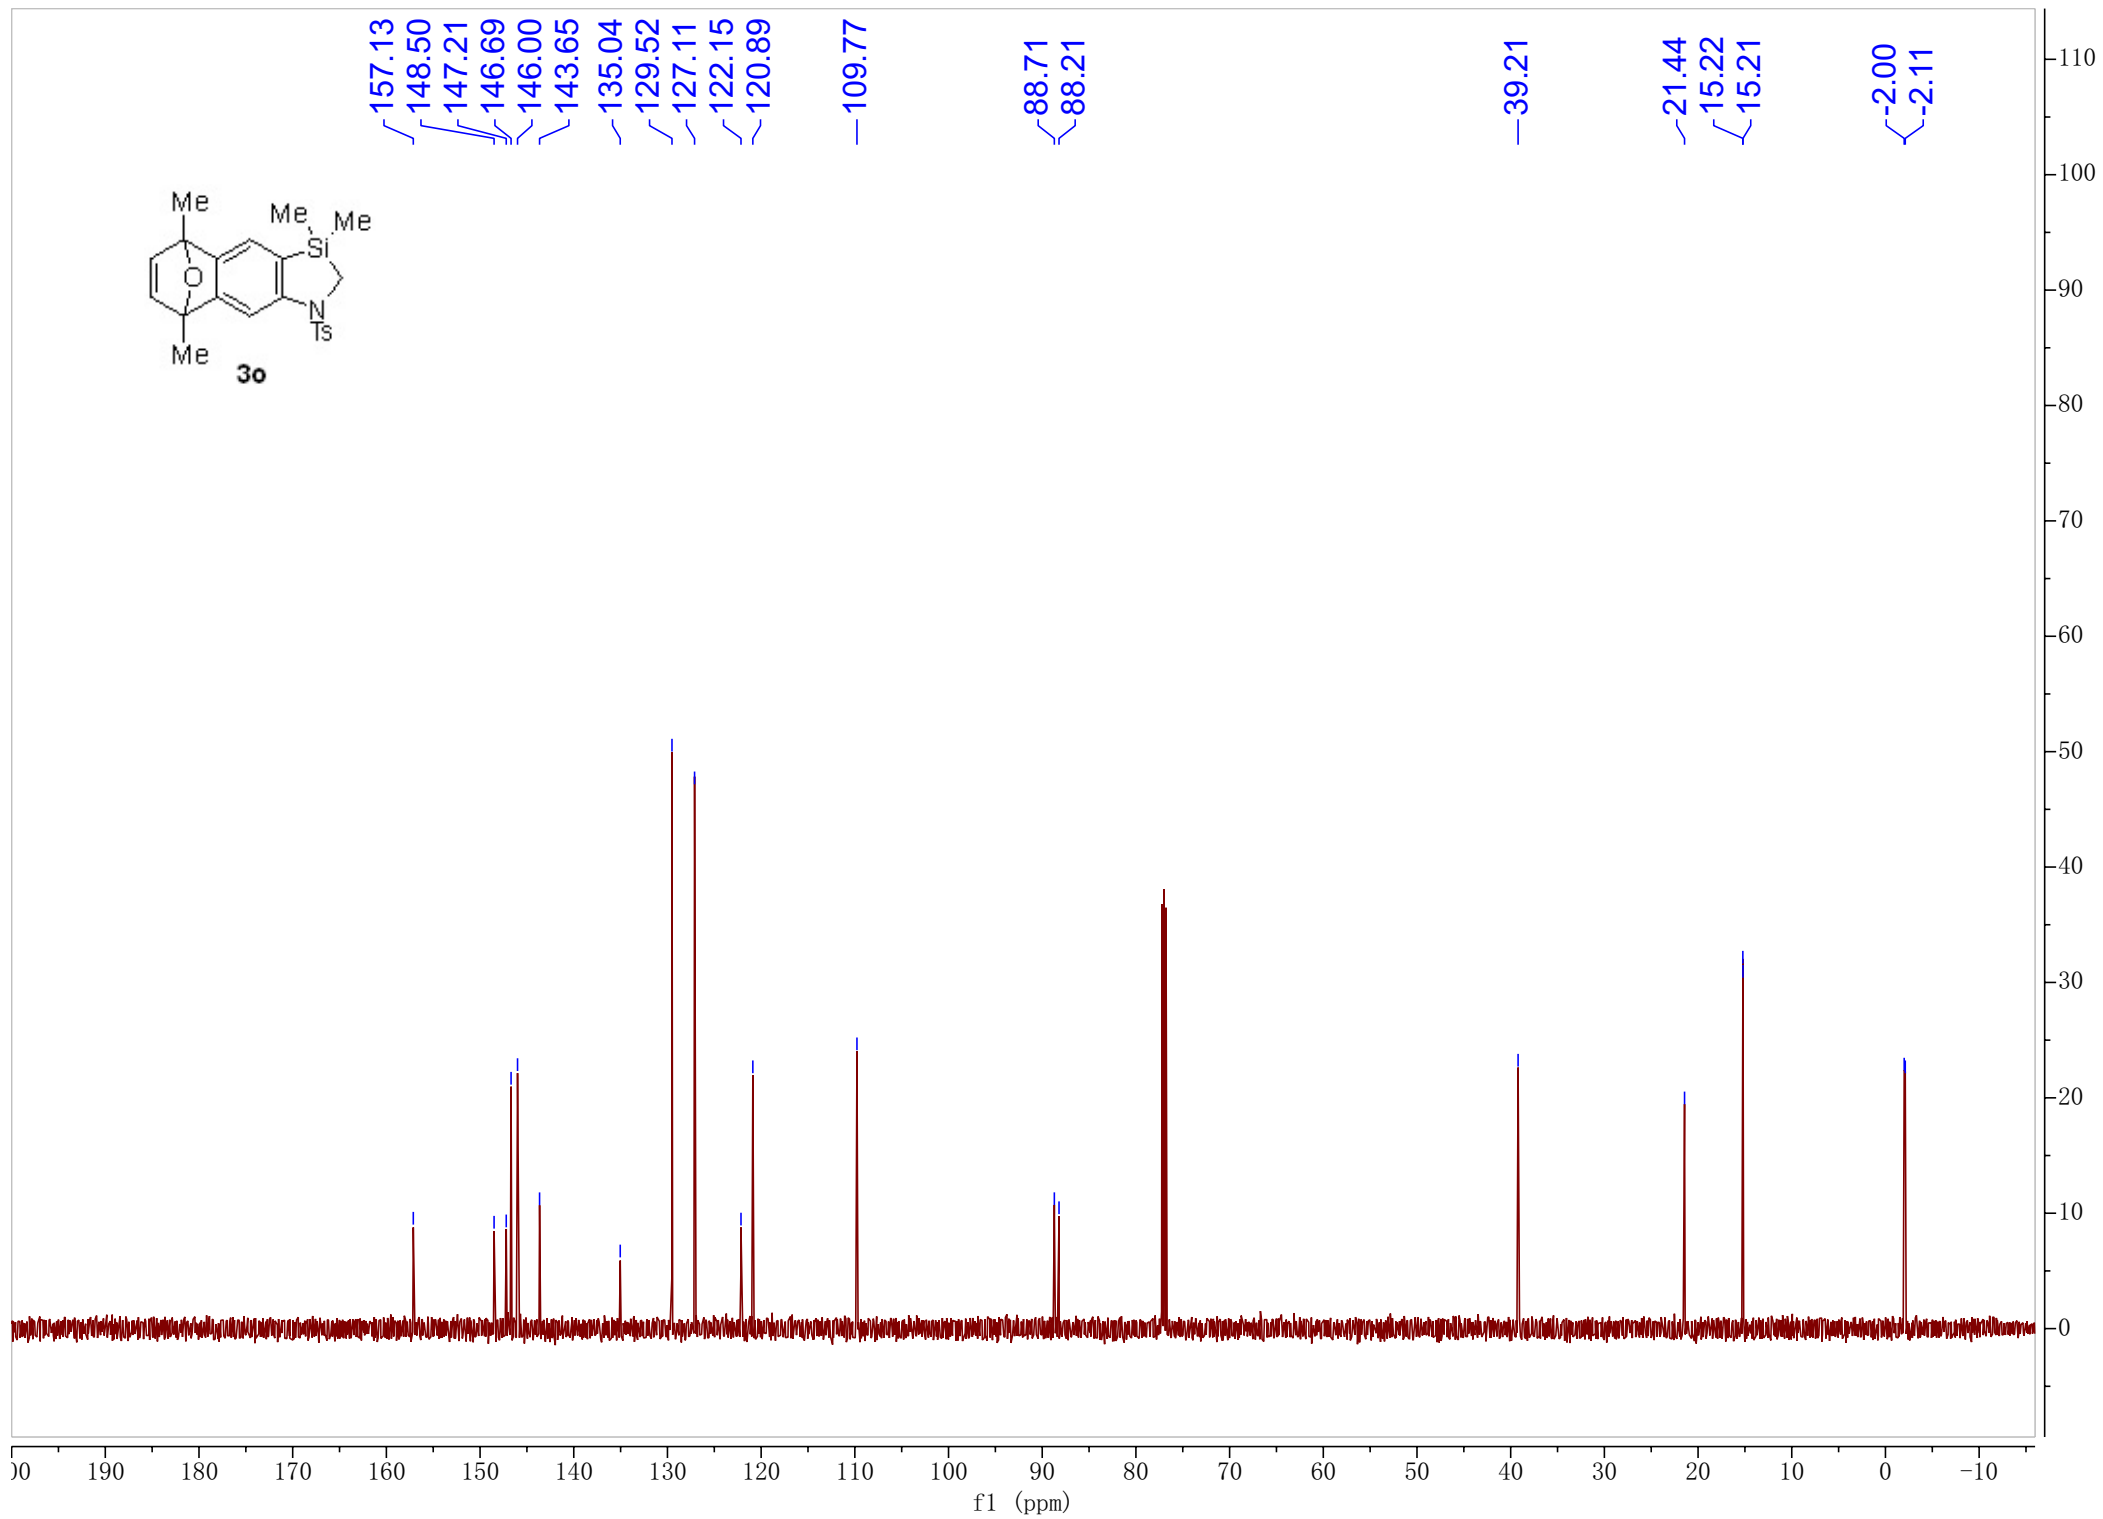

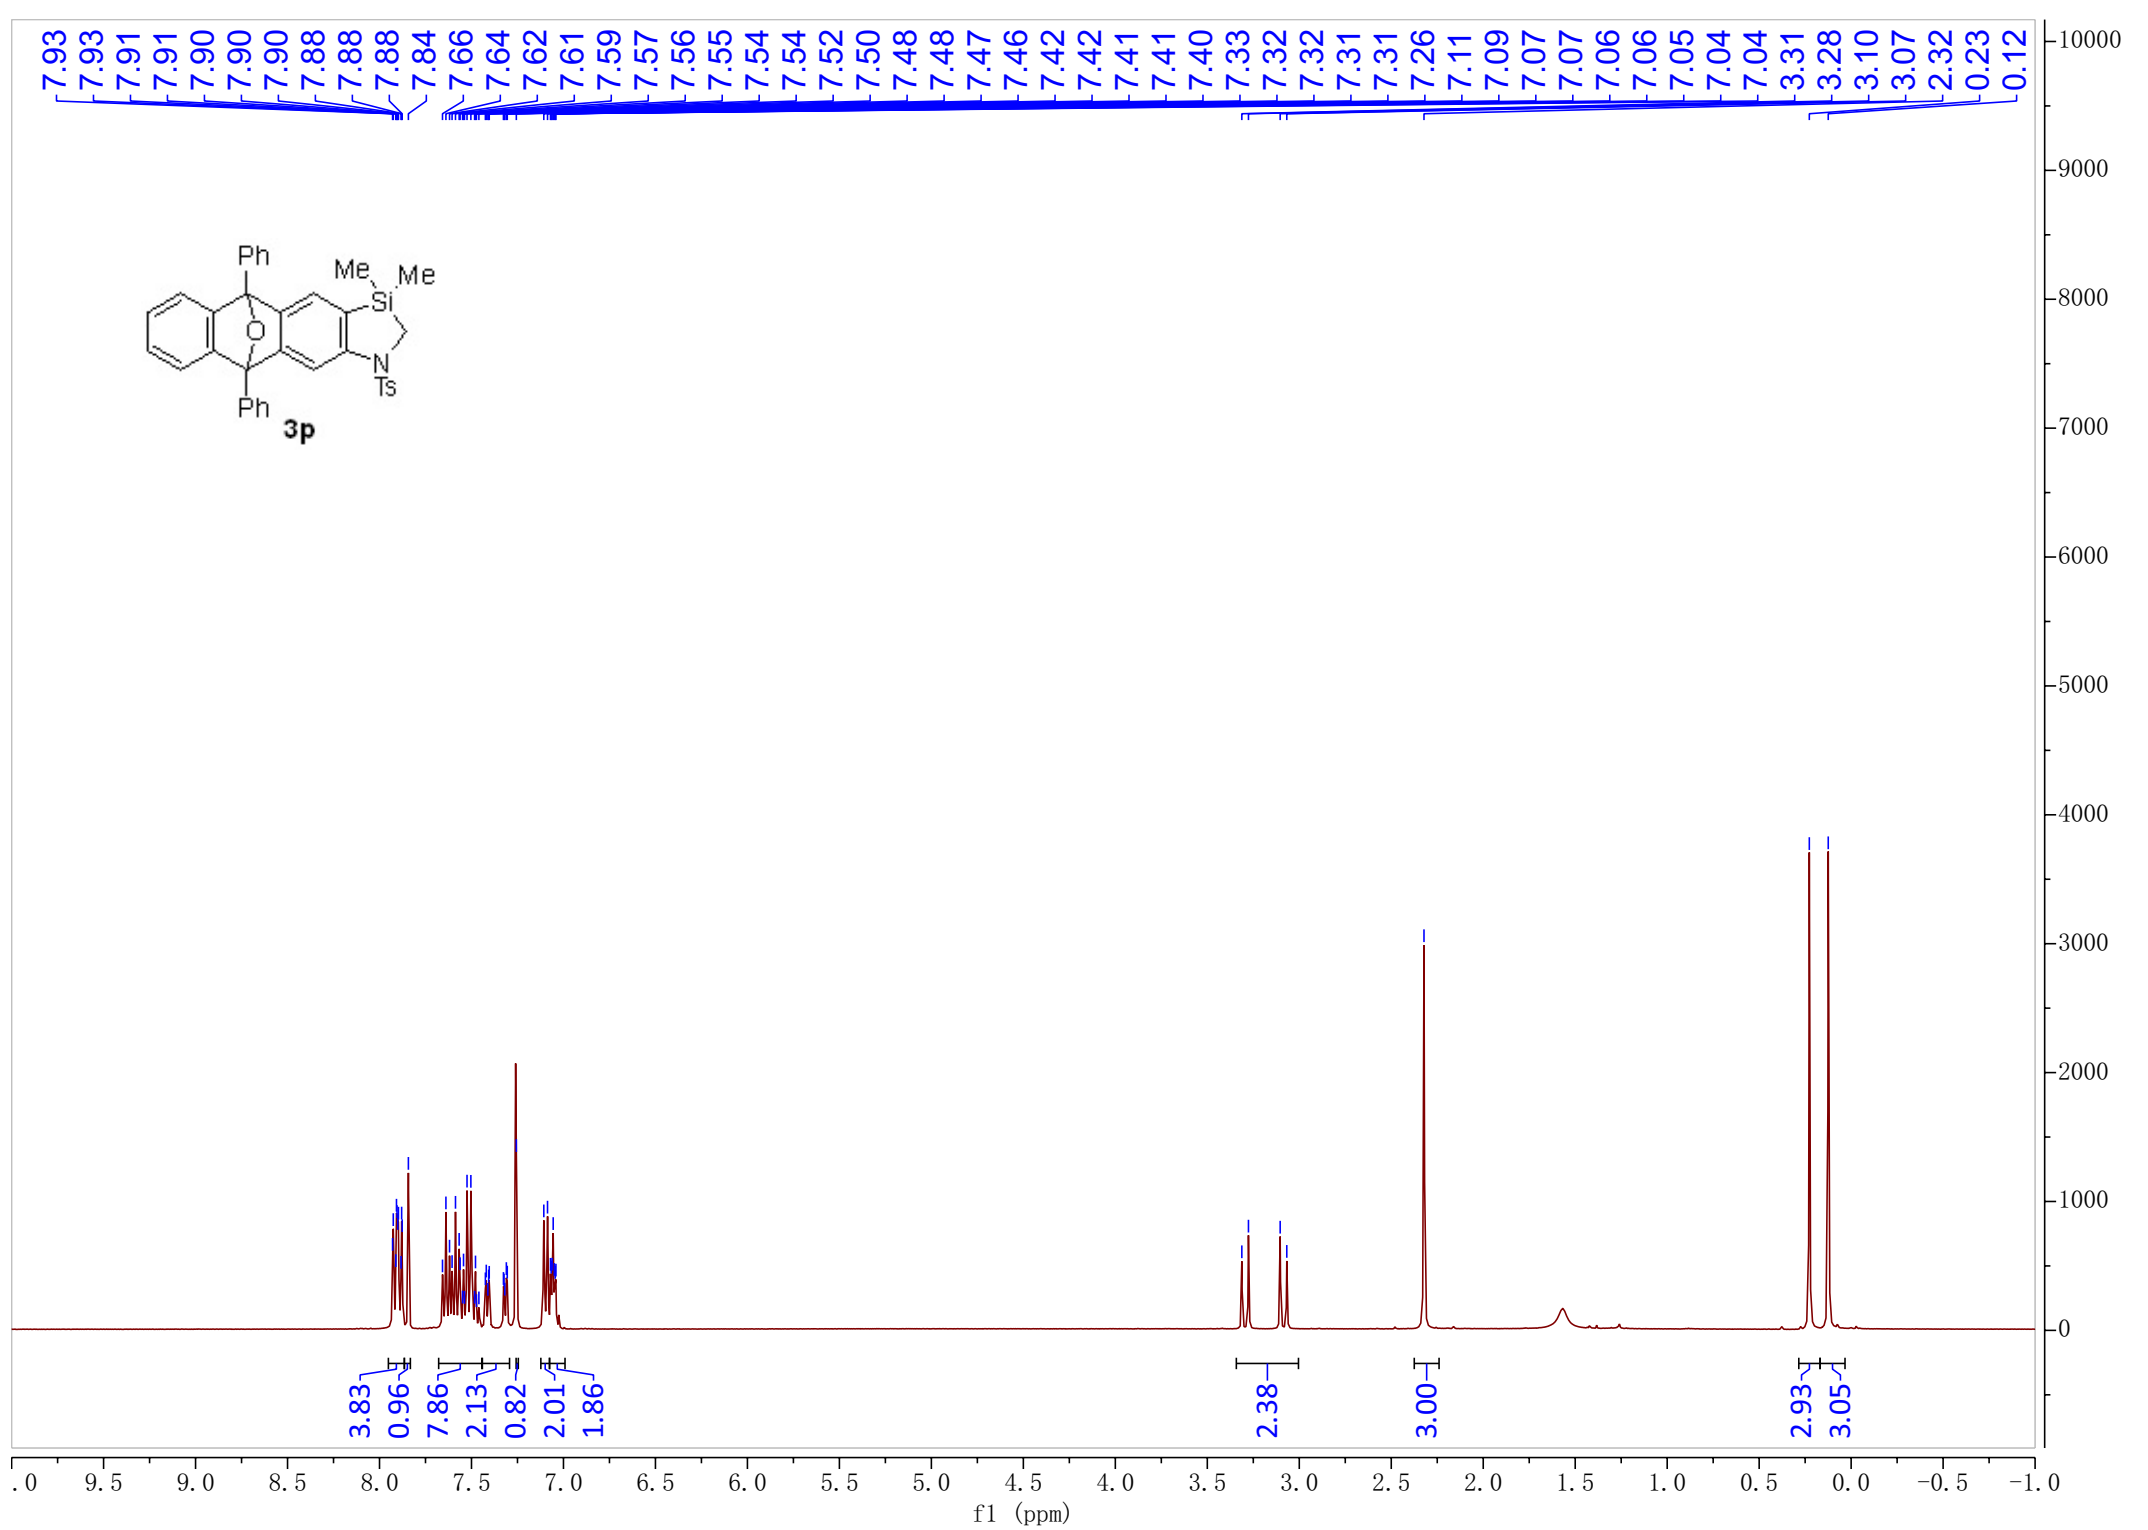

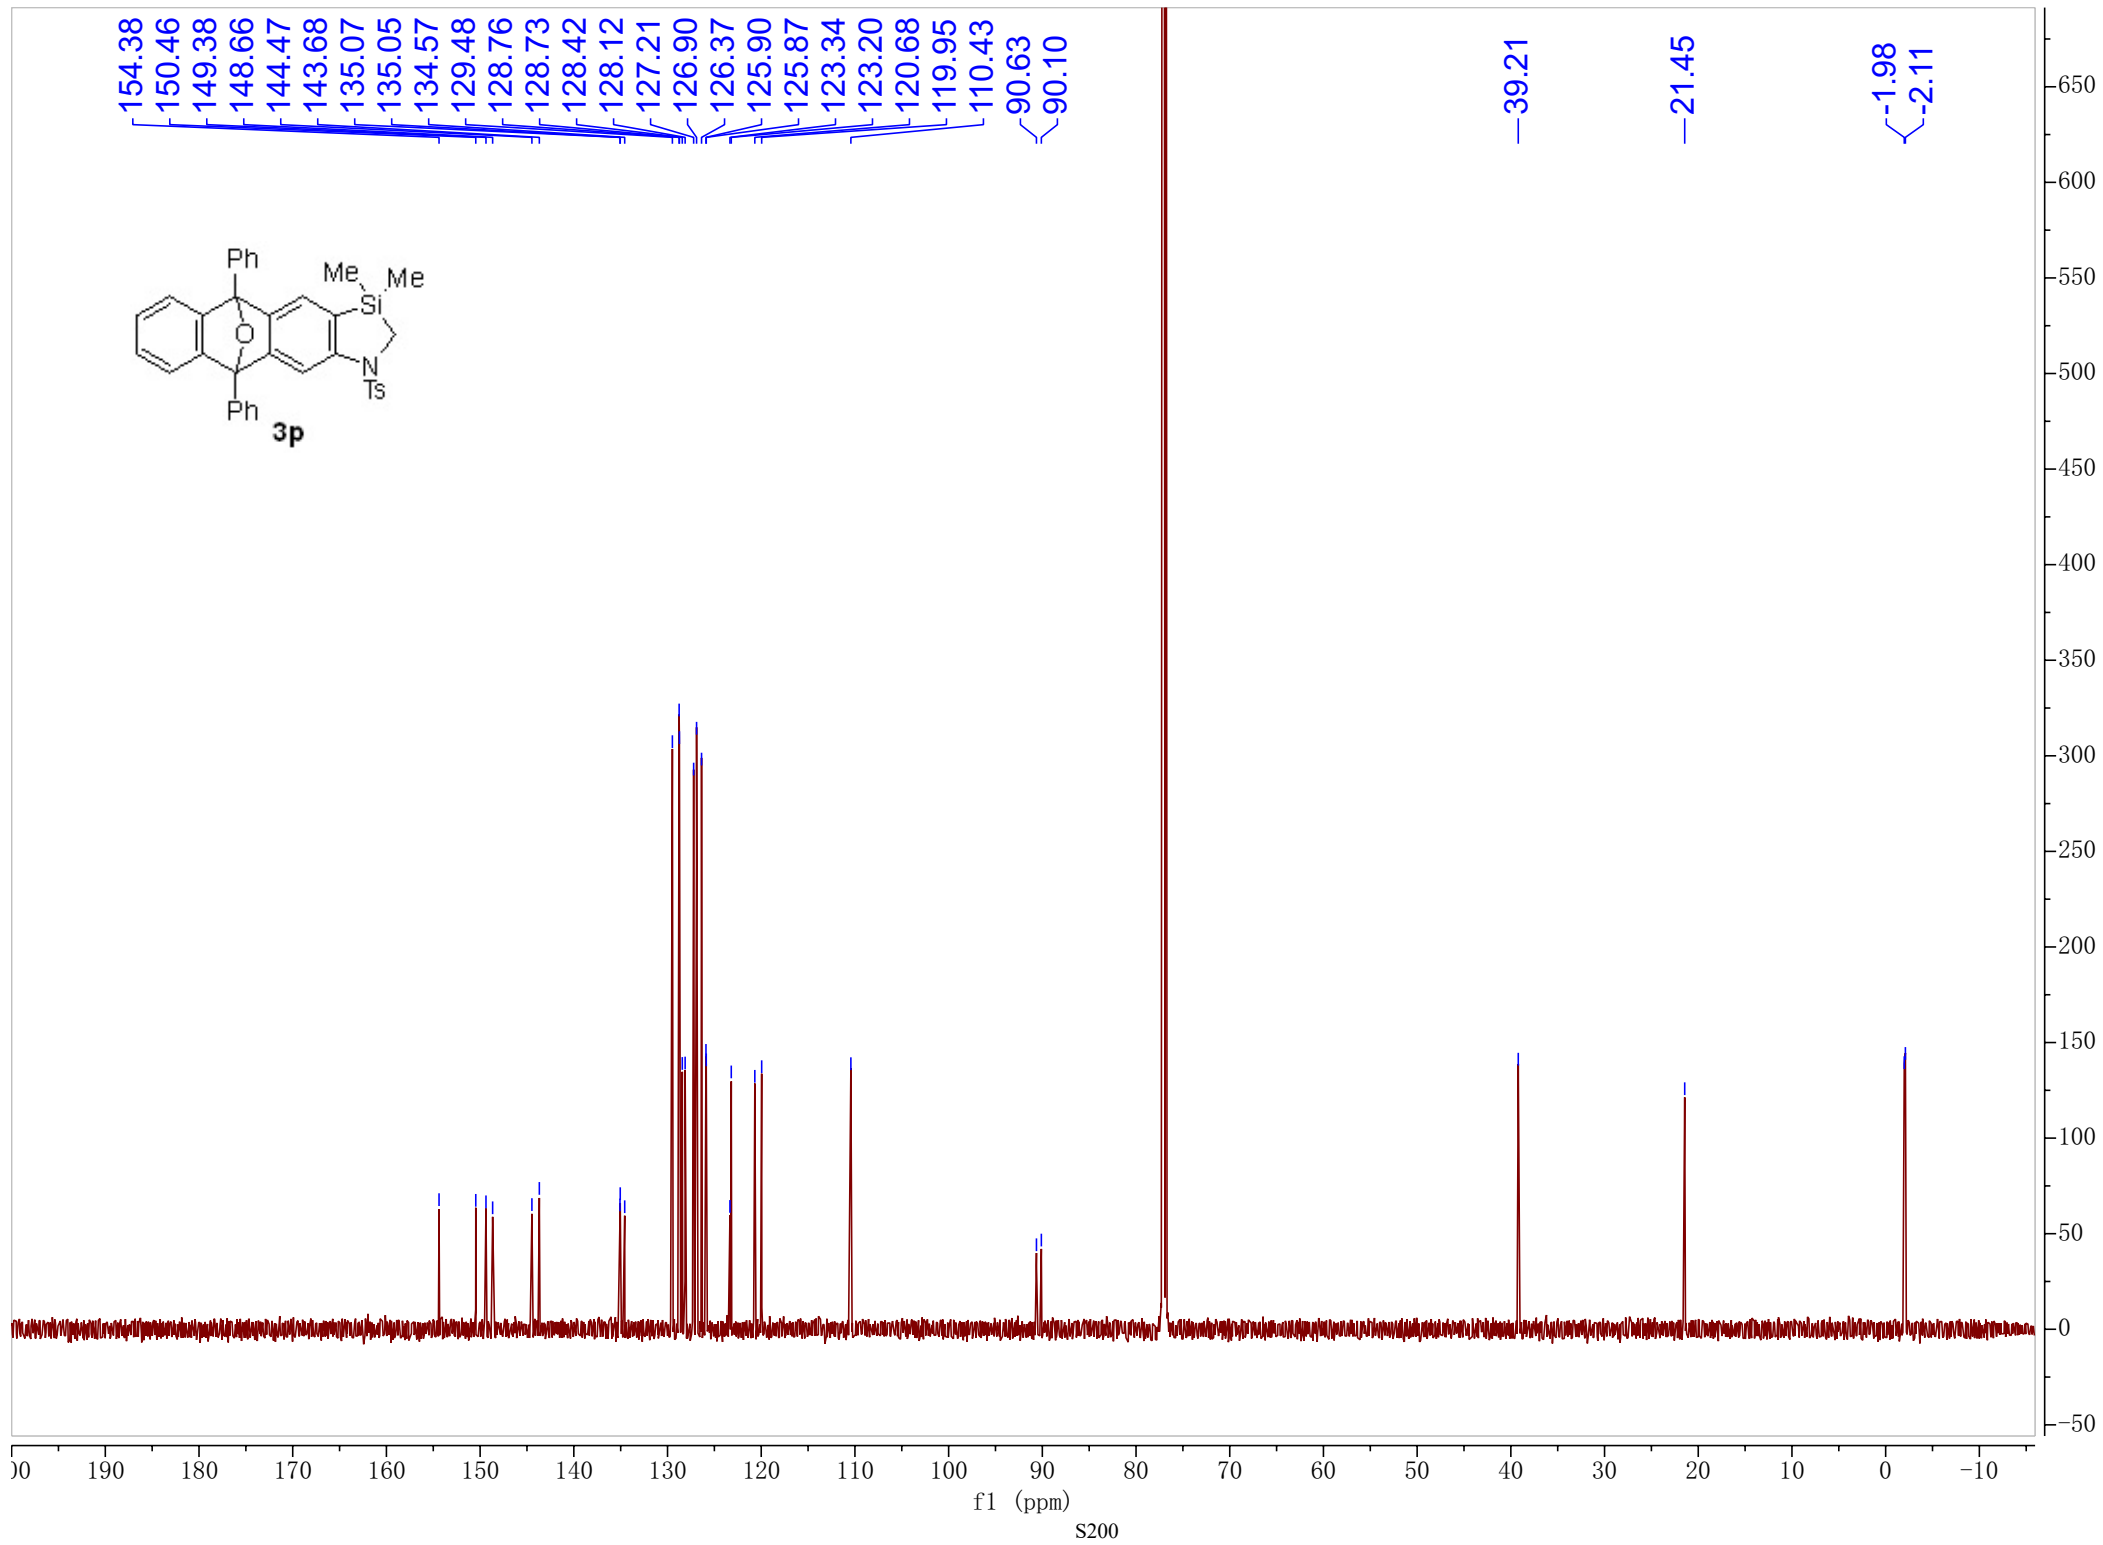



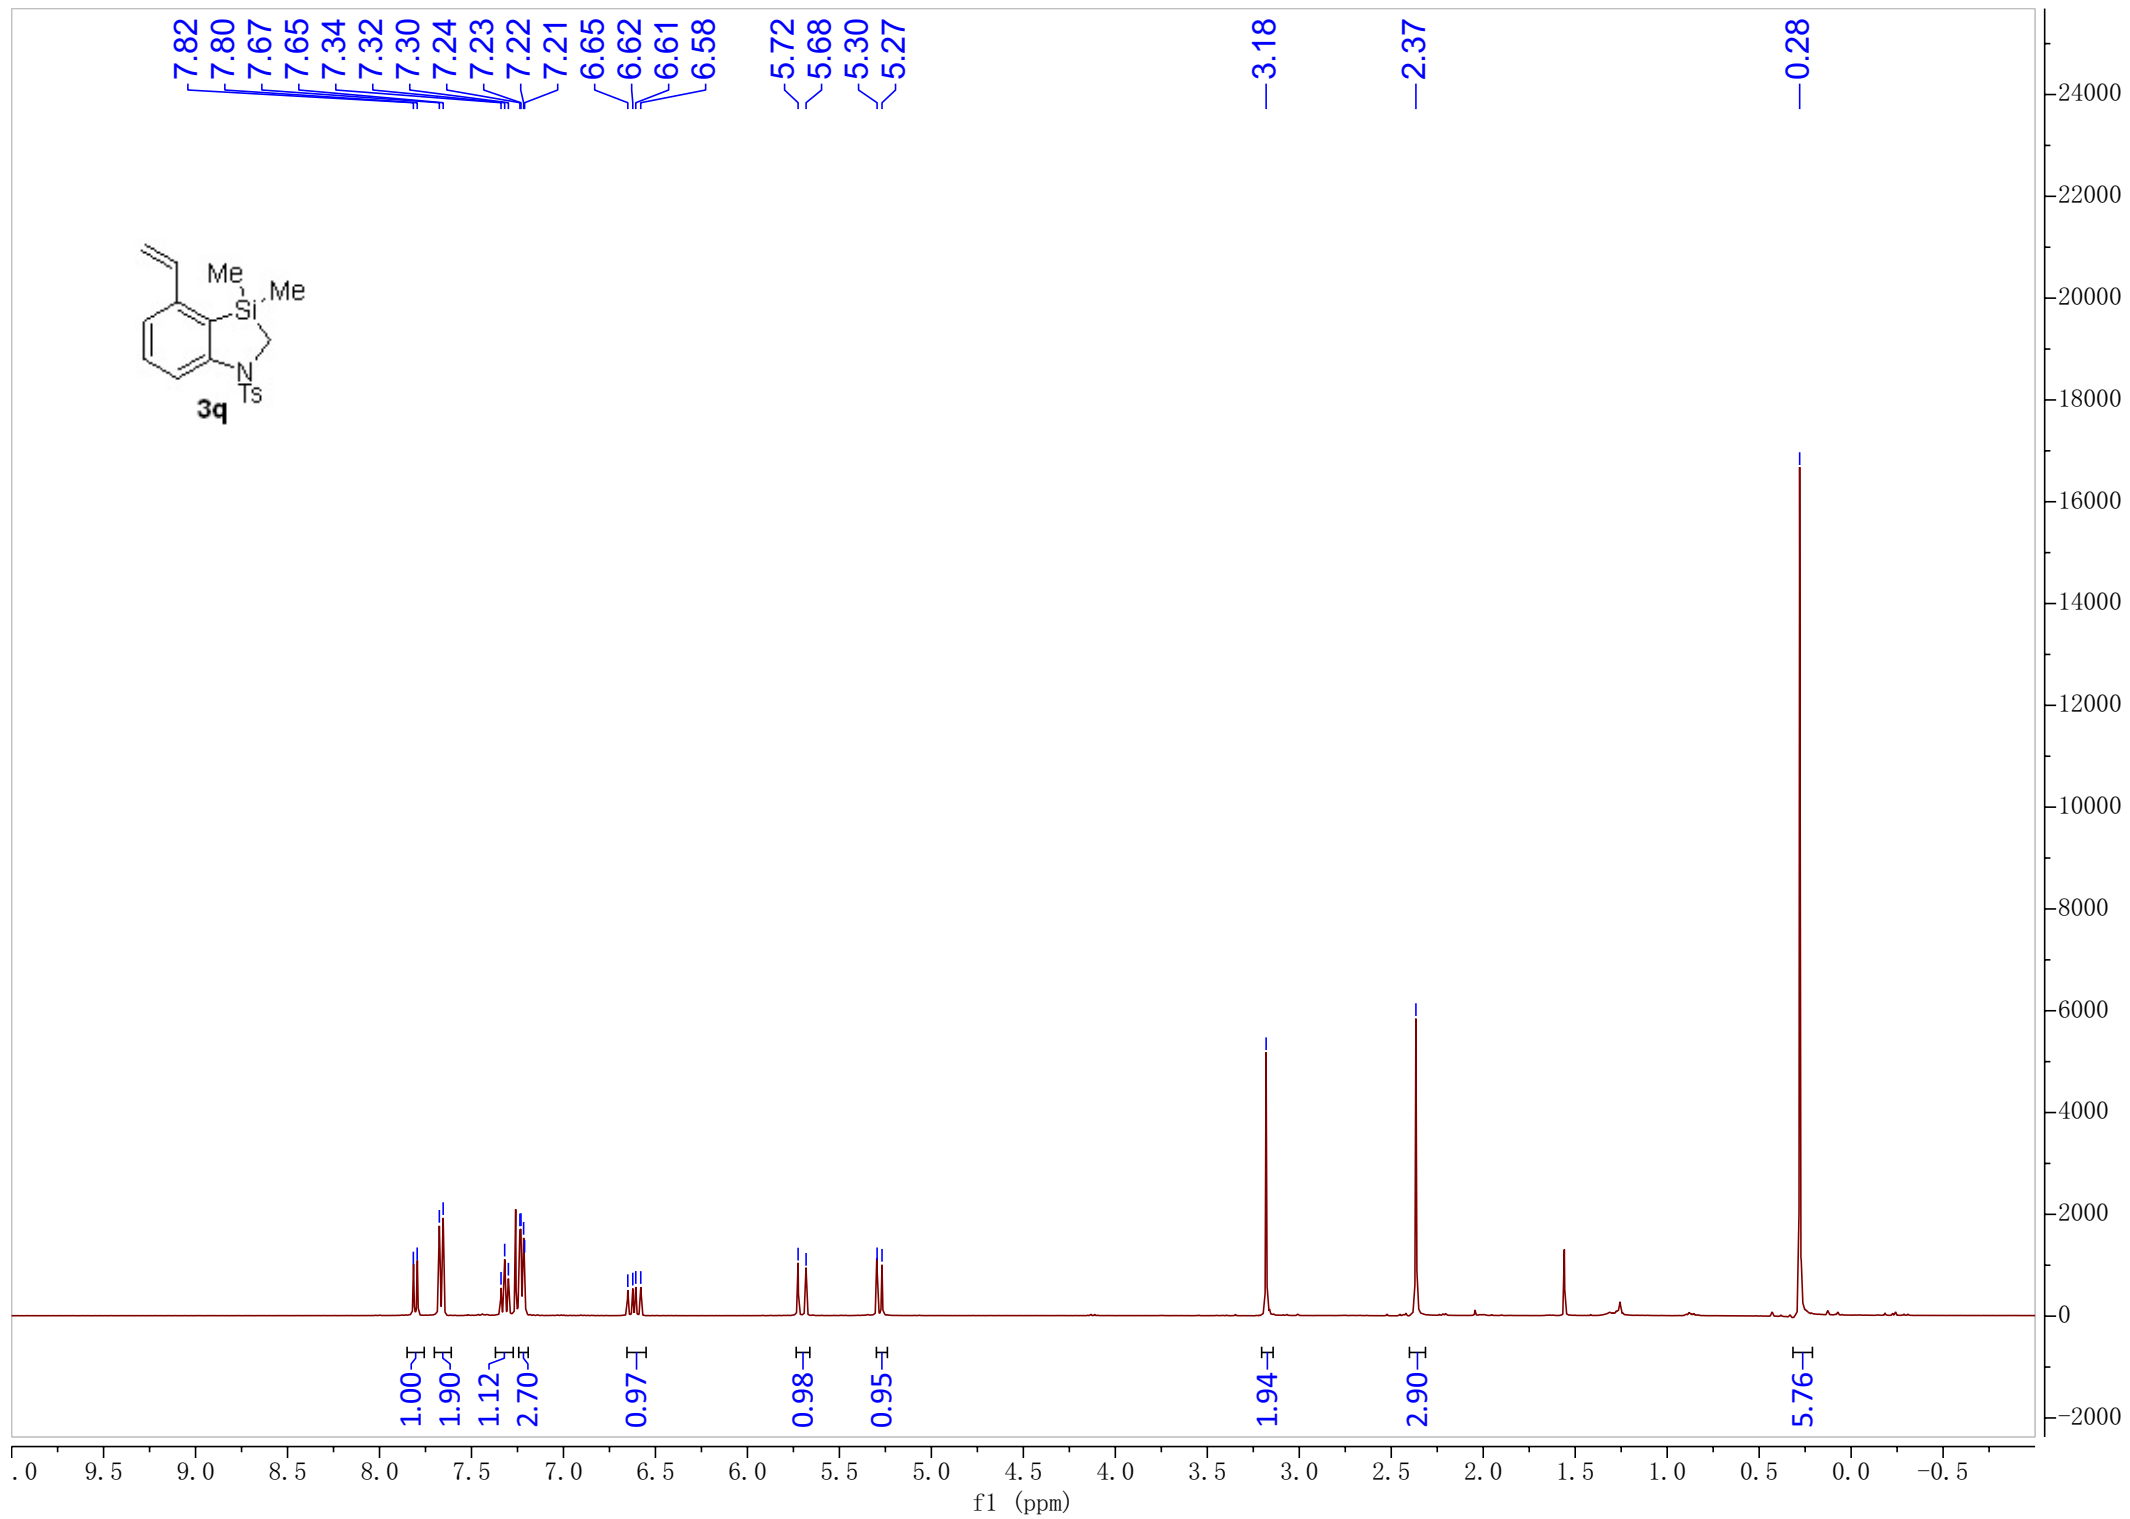

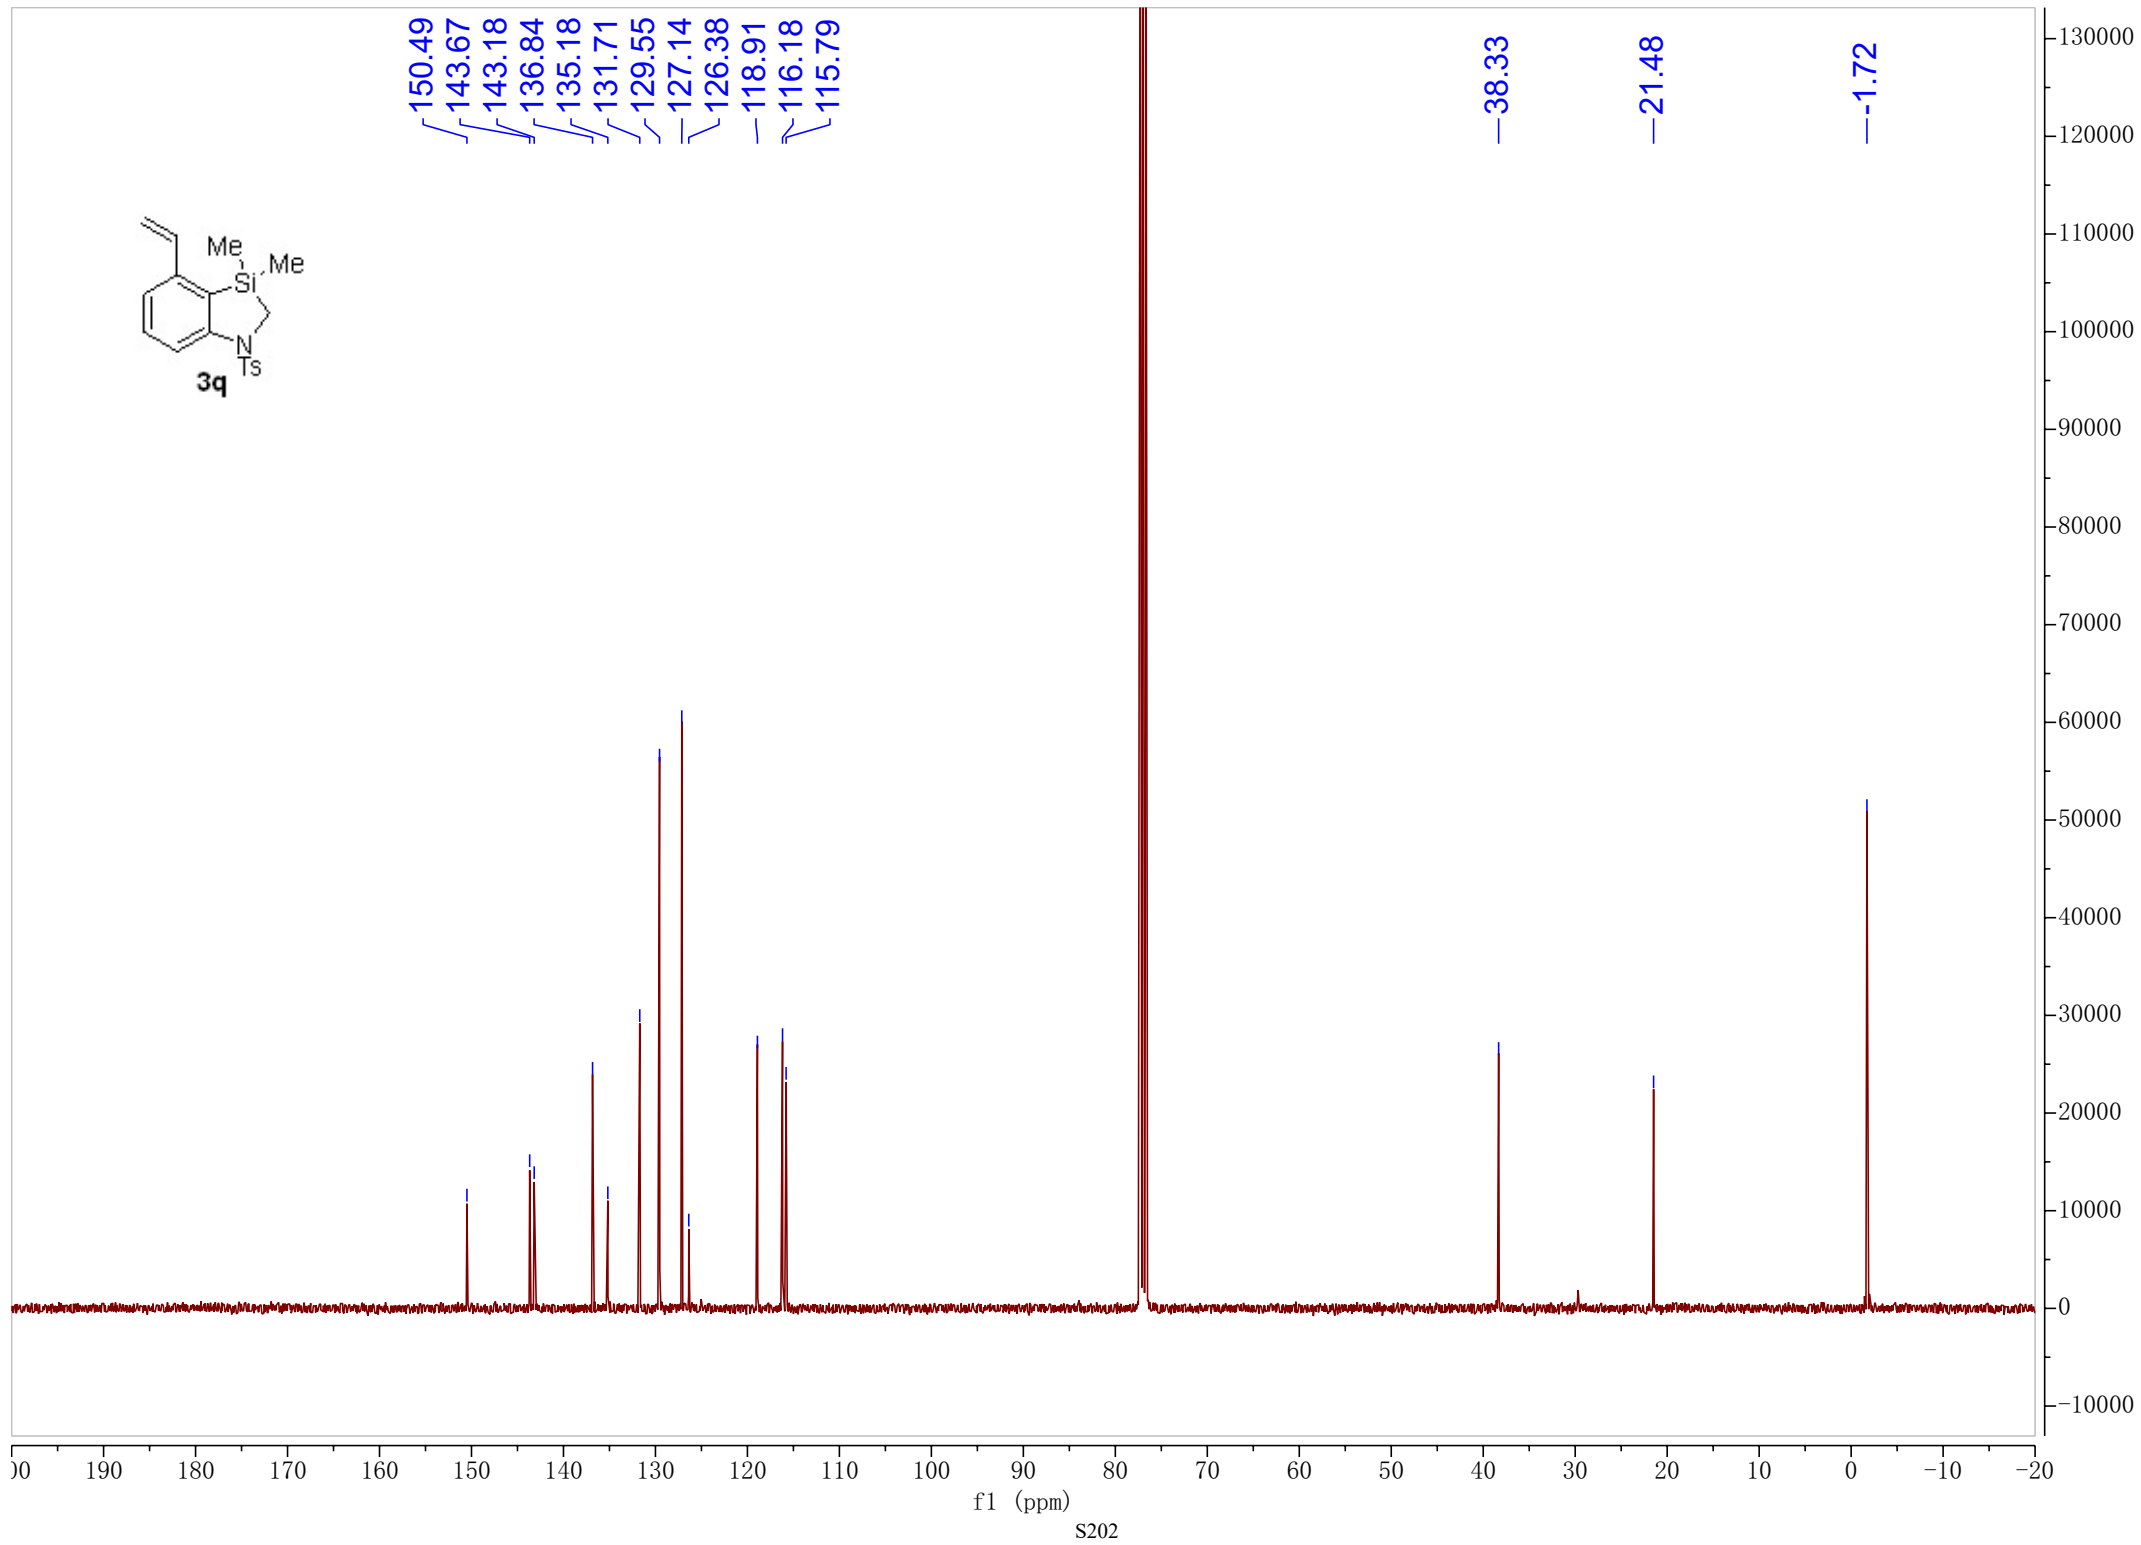

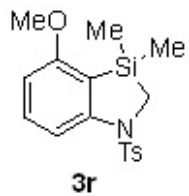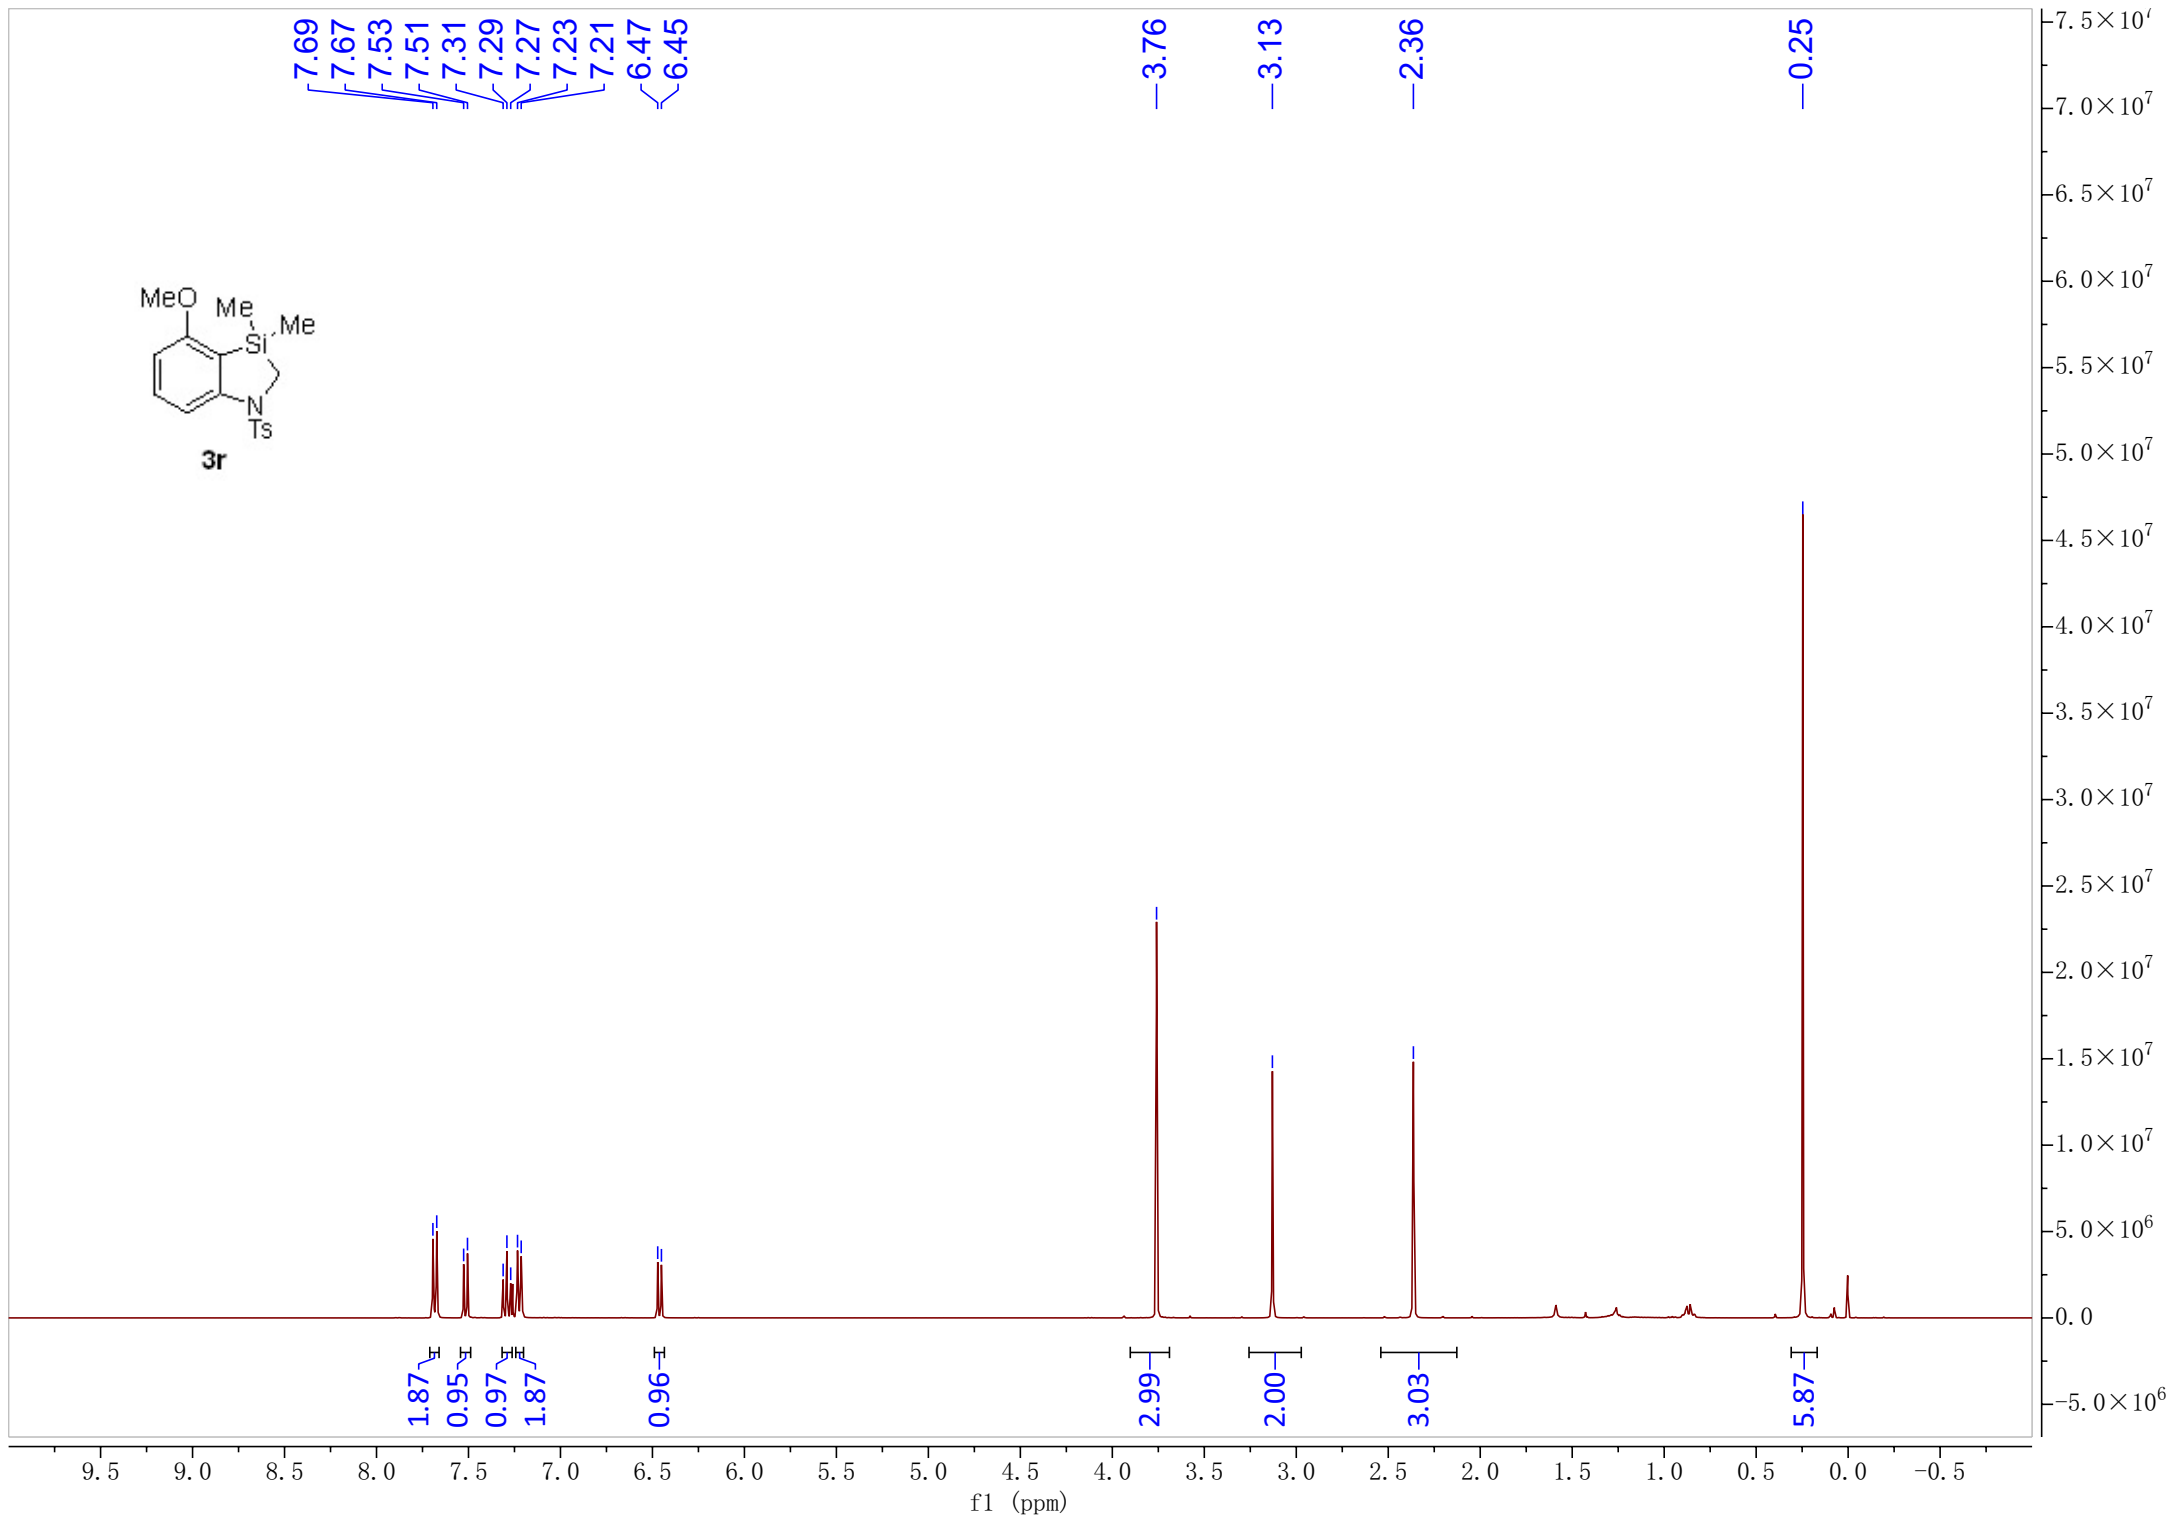

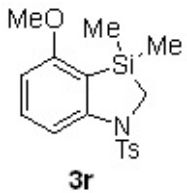

— 163.79  
— 151.46  
— 143.53  
/ 135.27  
— 133.32  
— 129.49  
/ 127.08  
  
/ 114.14  
/ 109.79  
/ 103.92

— 55.22  
— 38.89  
— 21.46  
— -2.48

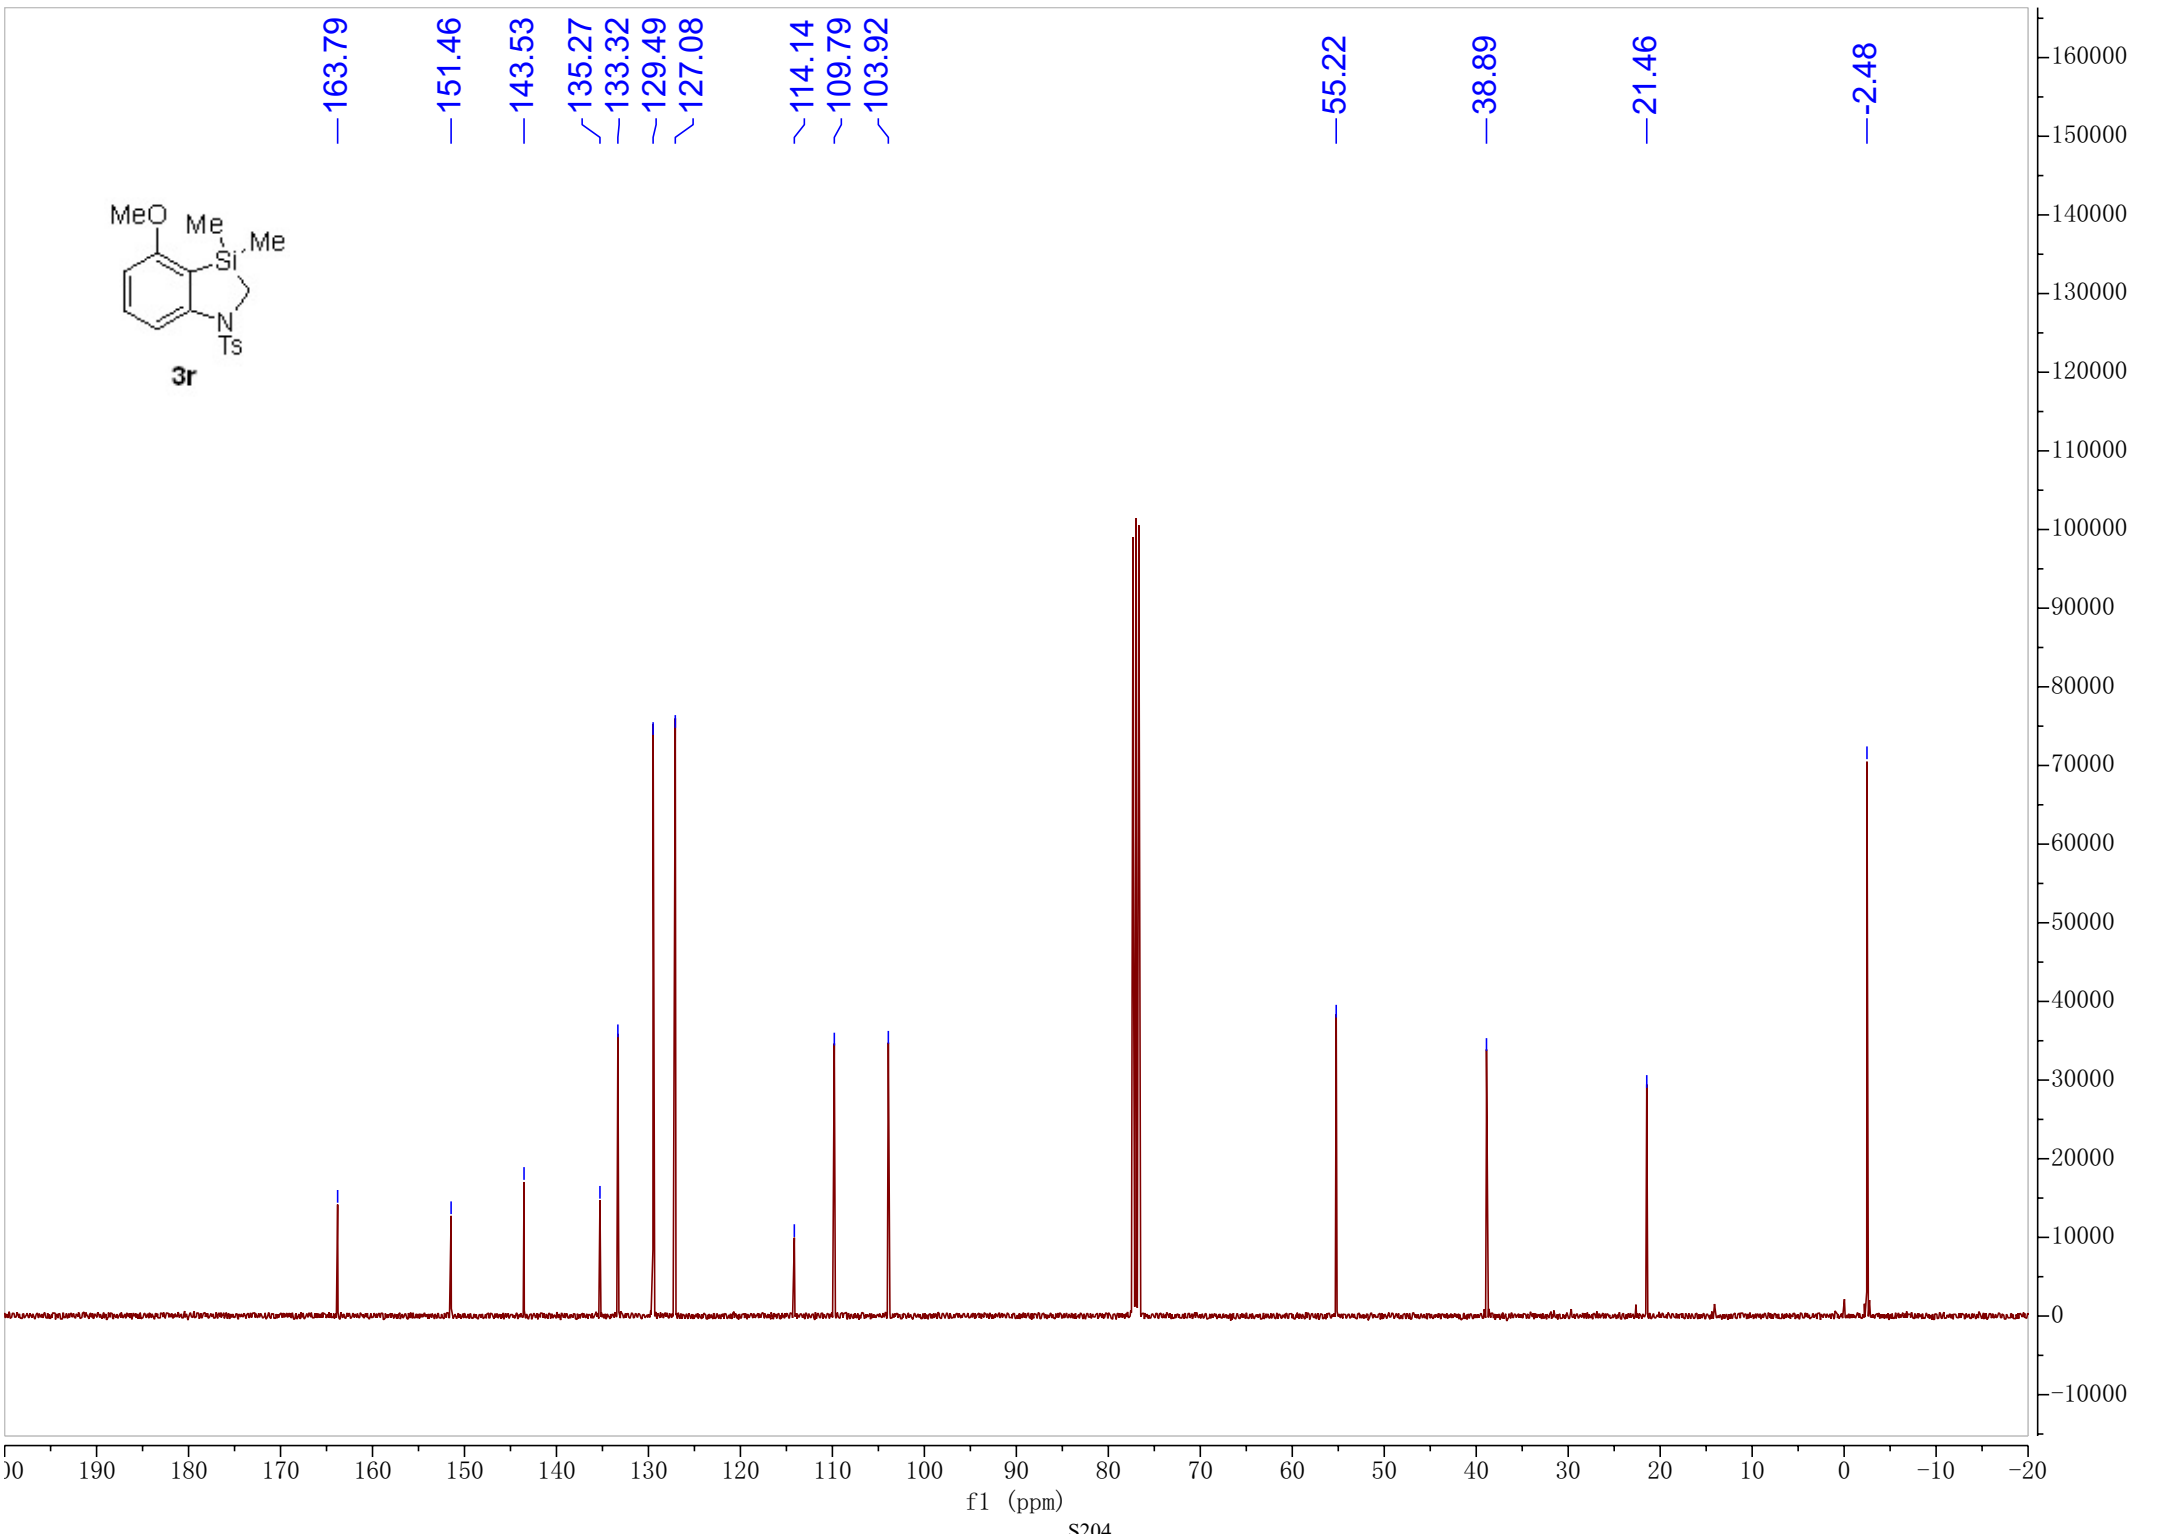

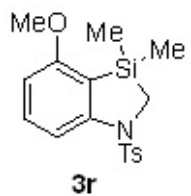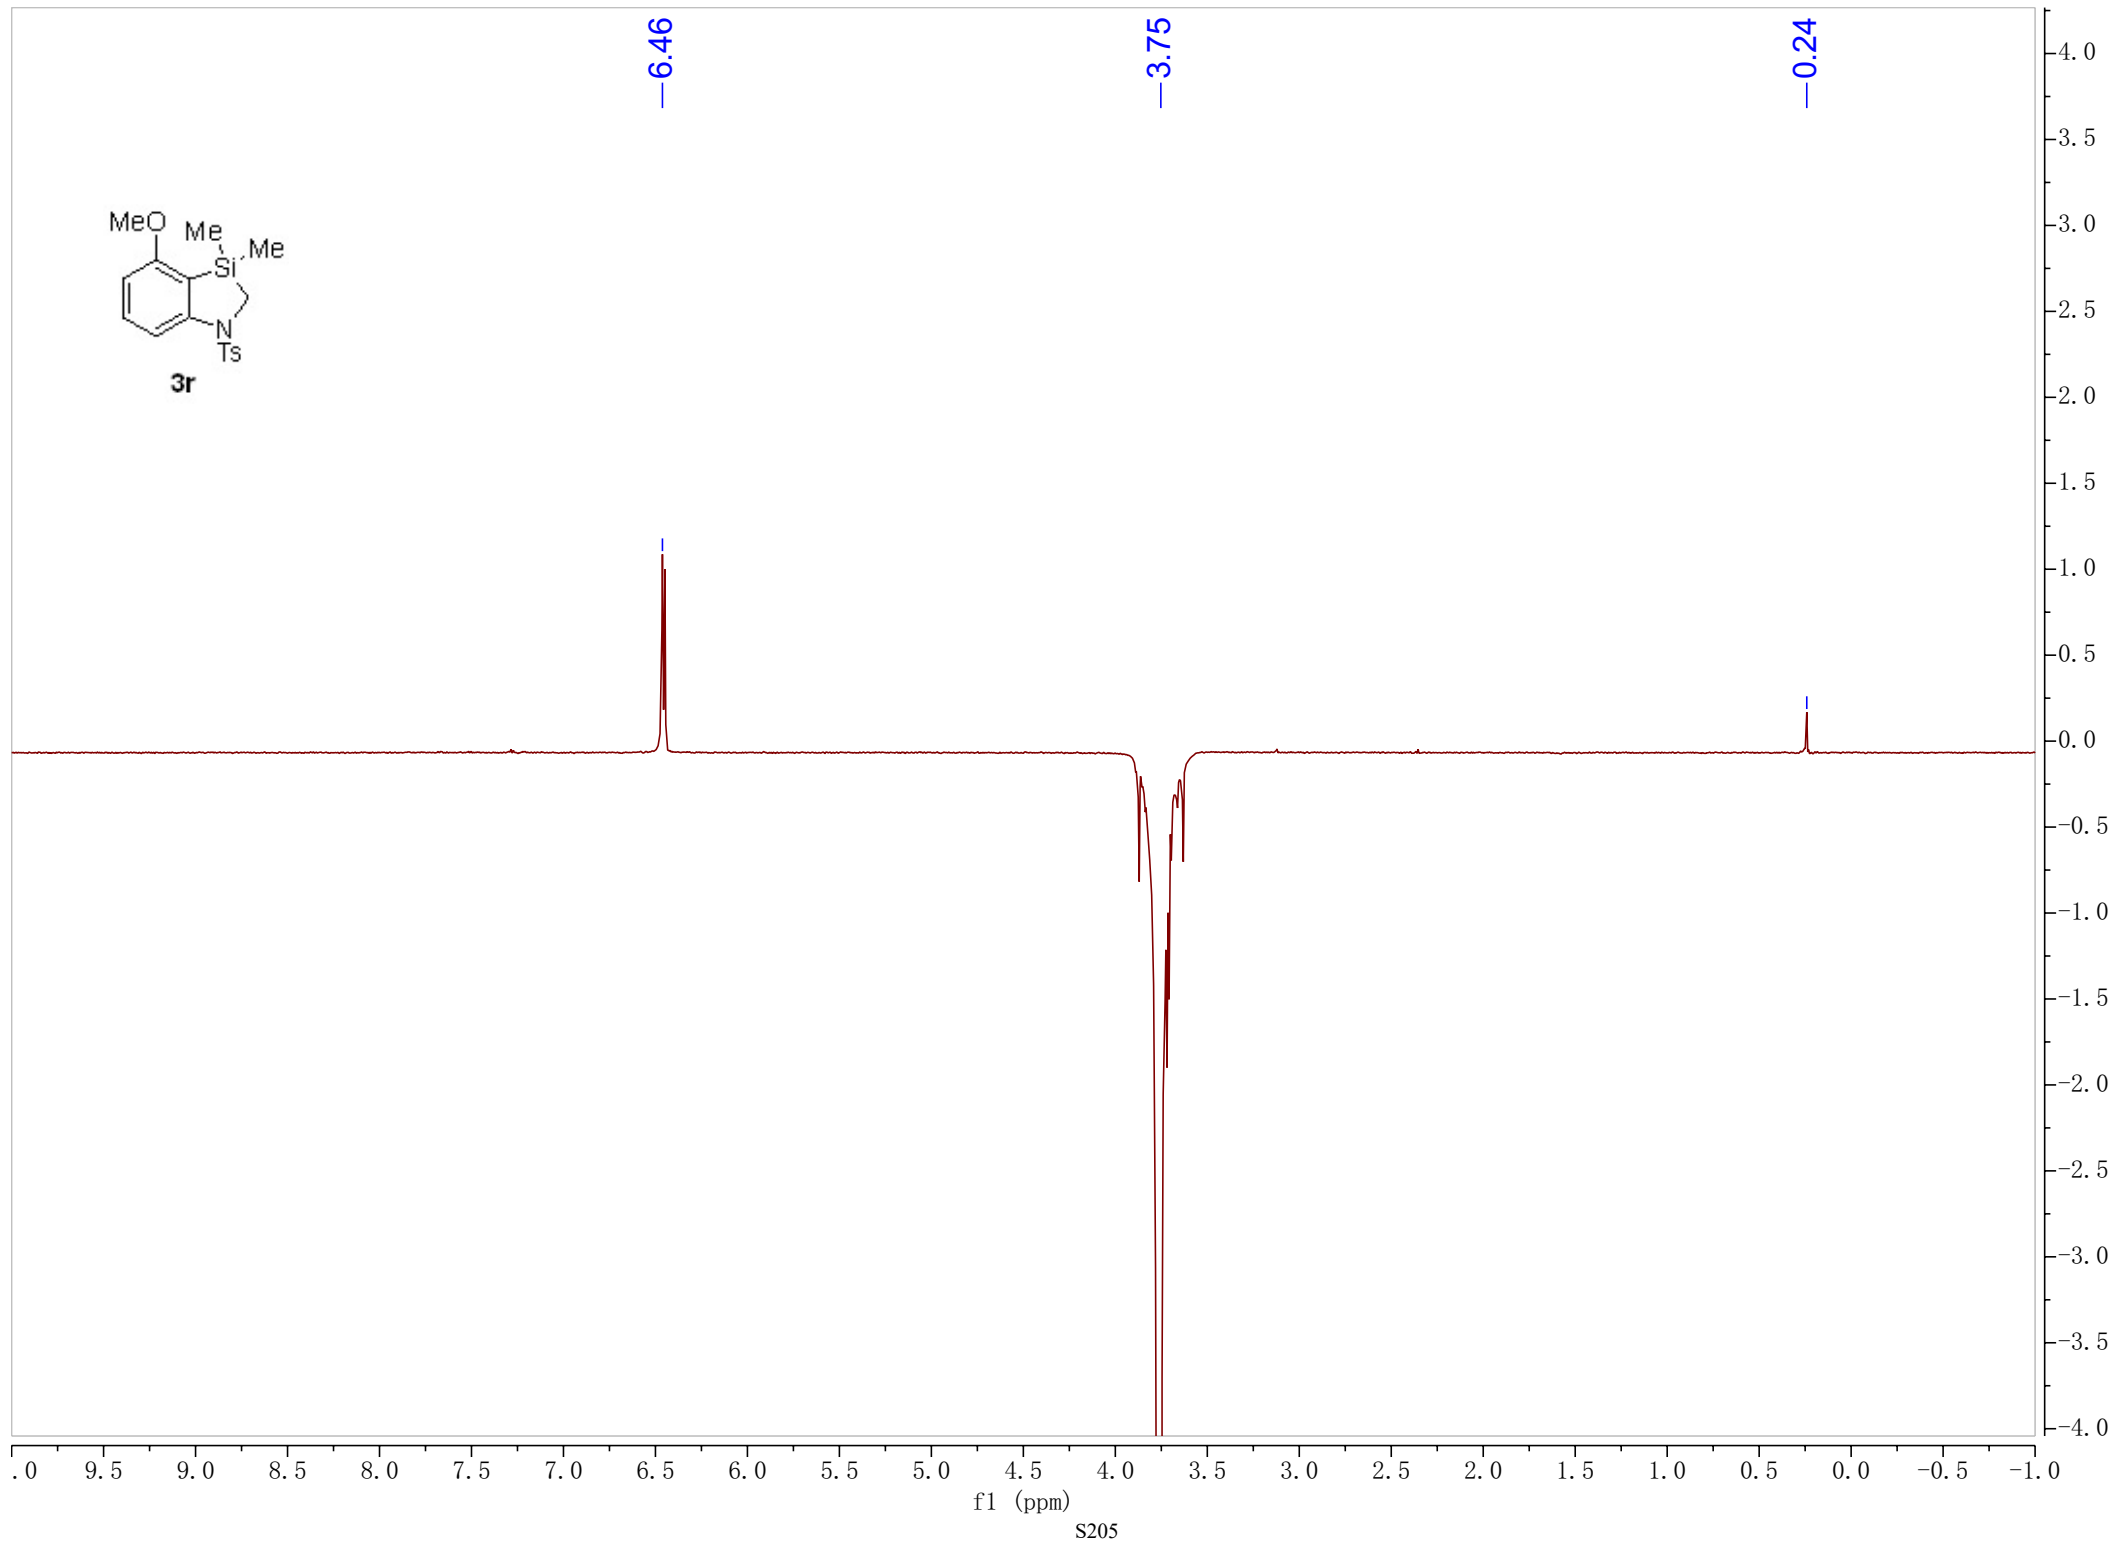

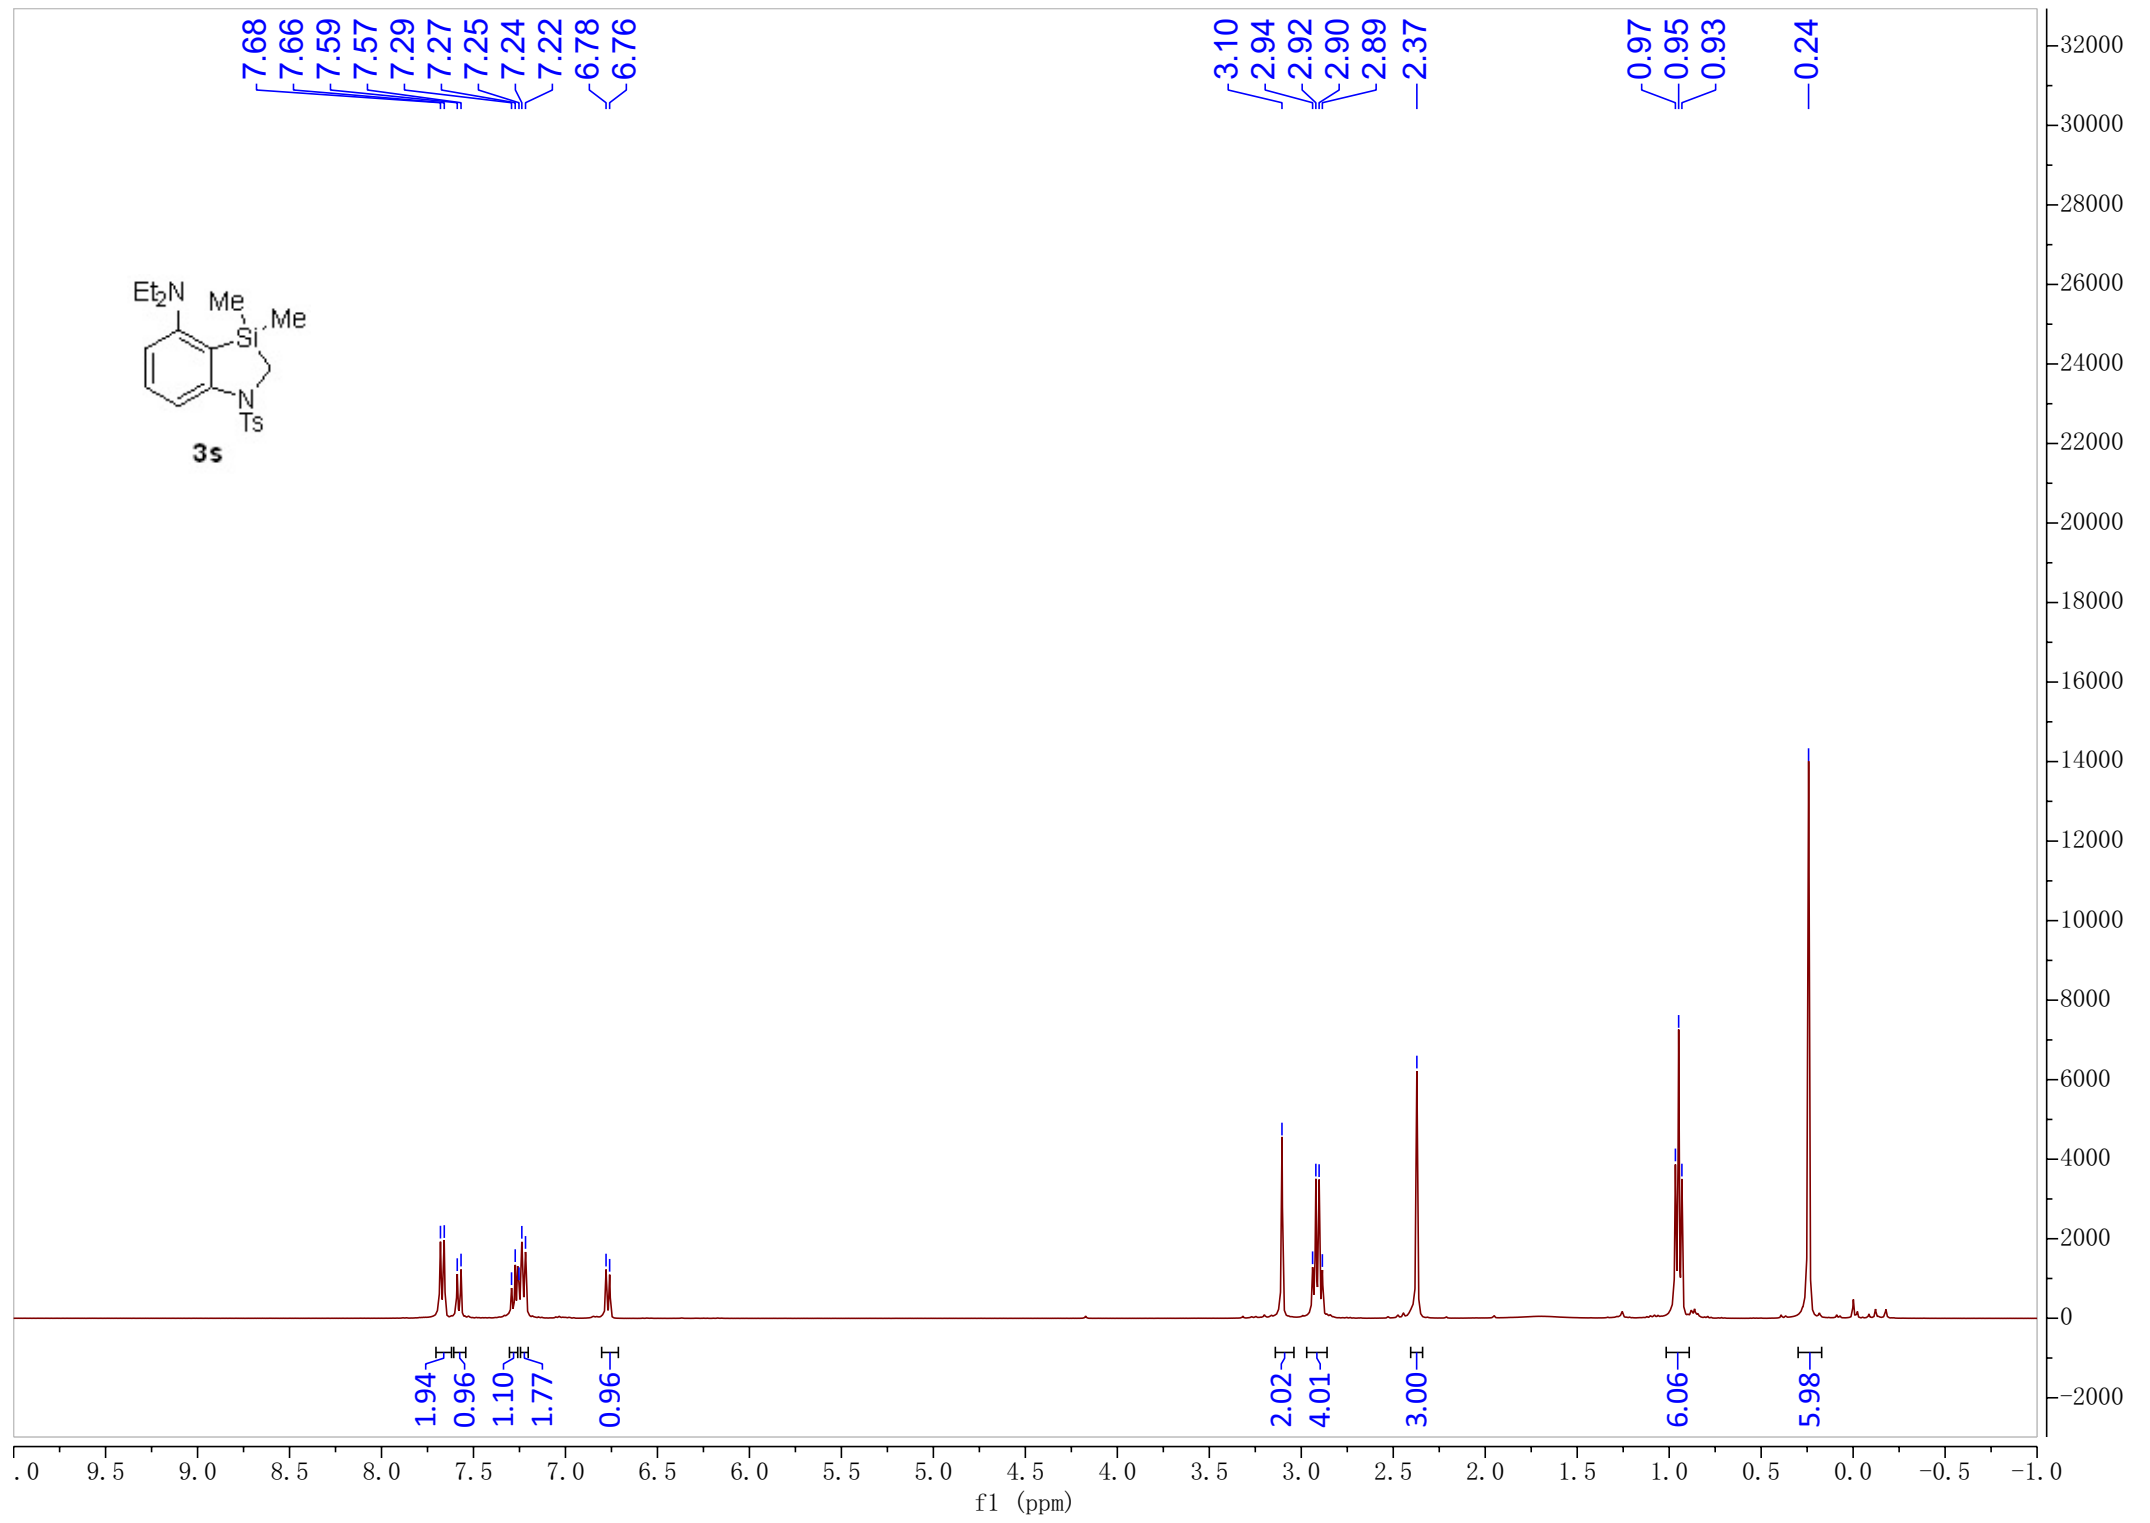

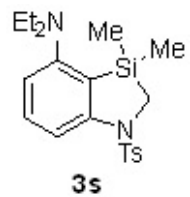

157.72  
151.37  
143.41  
135.51  
132.07  
129.42  
127.22  
125.69

116.59  
113.12

48.36

38.92

21.46

12.59

-1.71

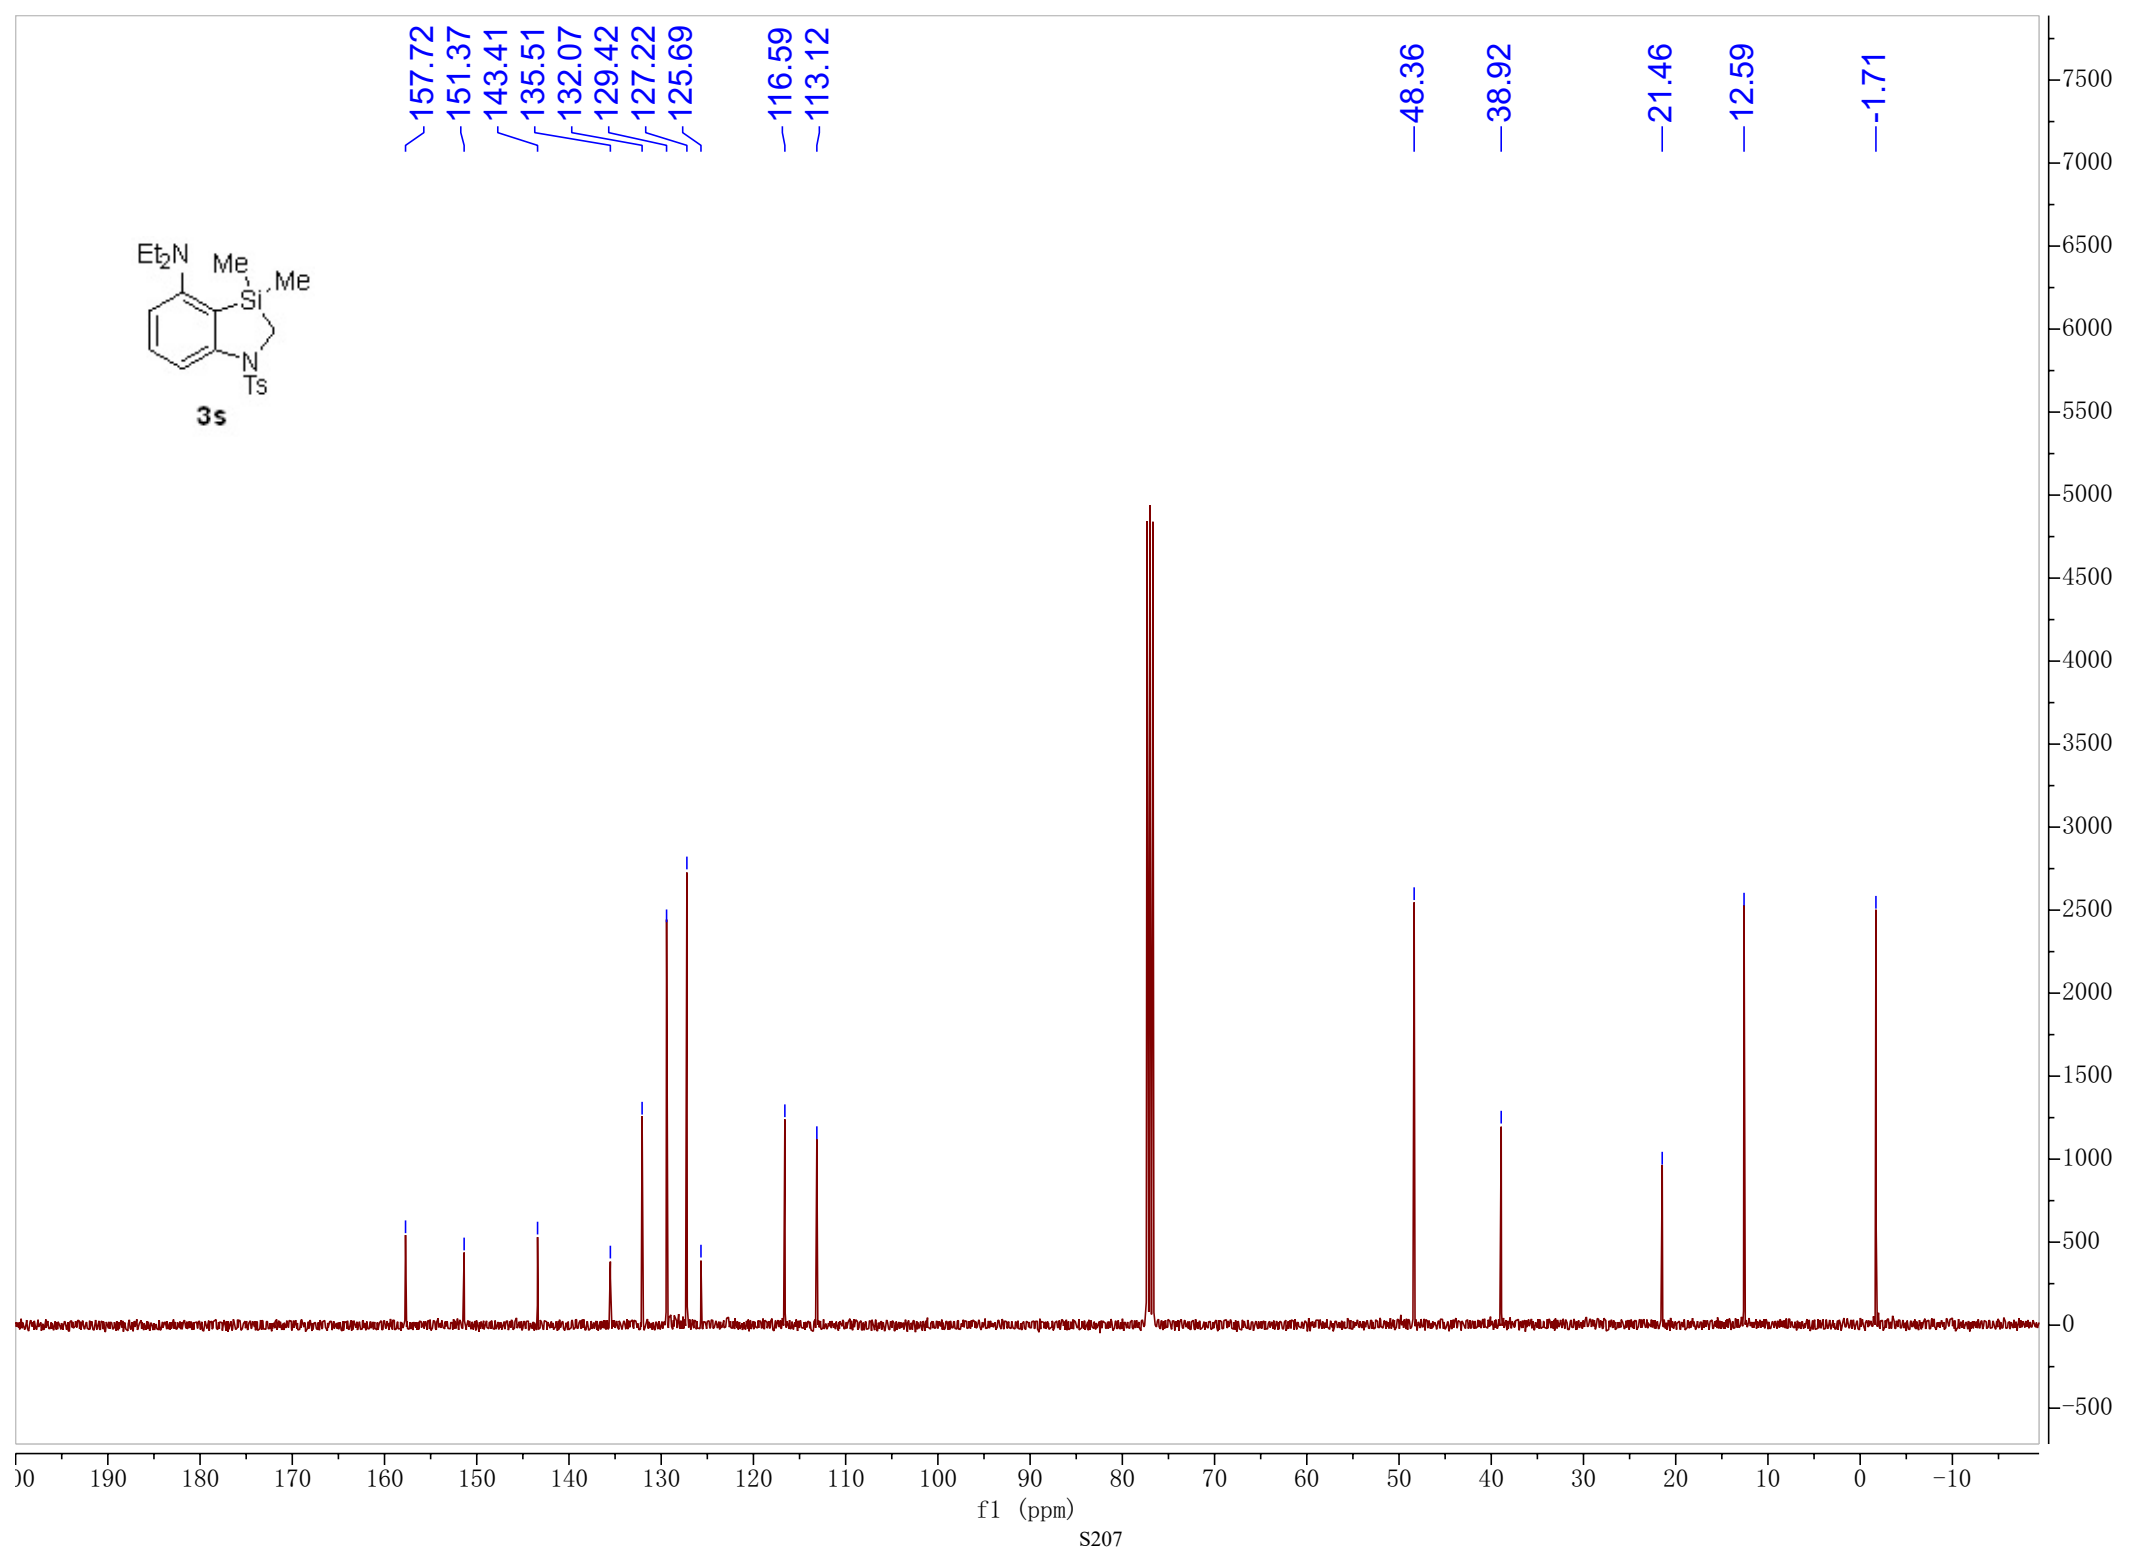

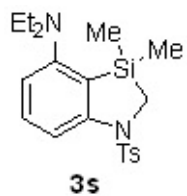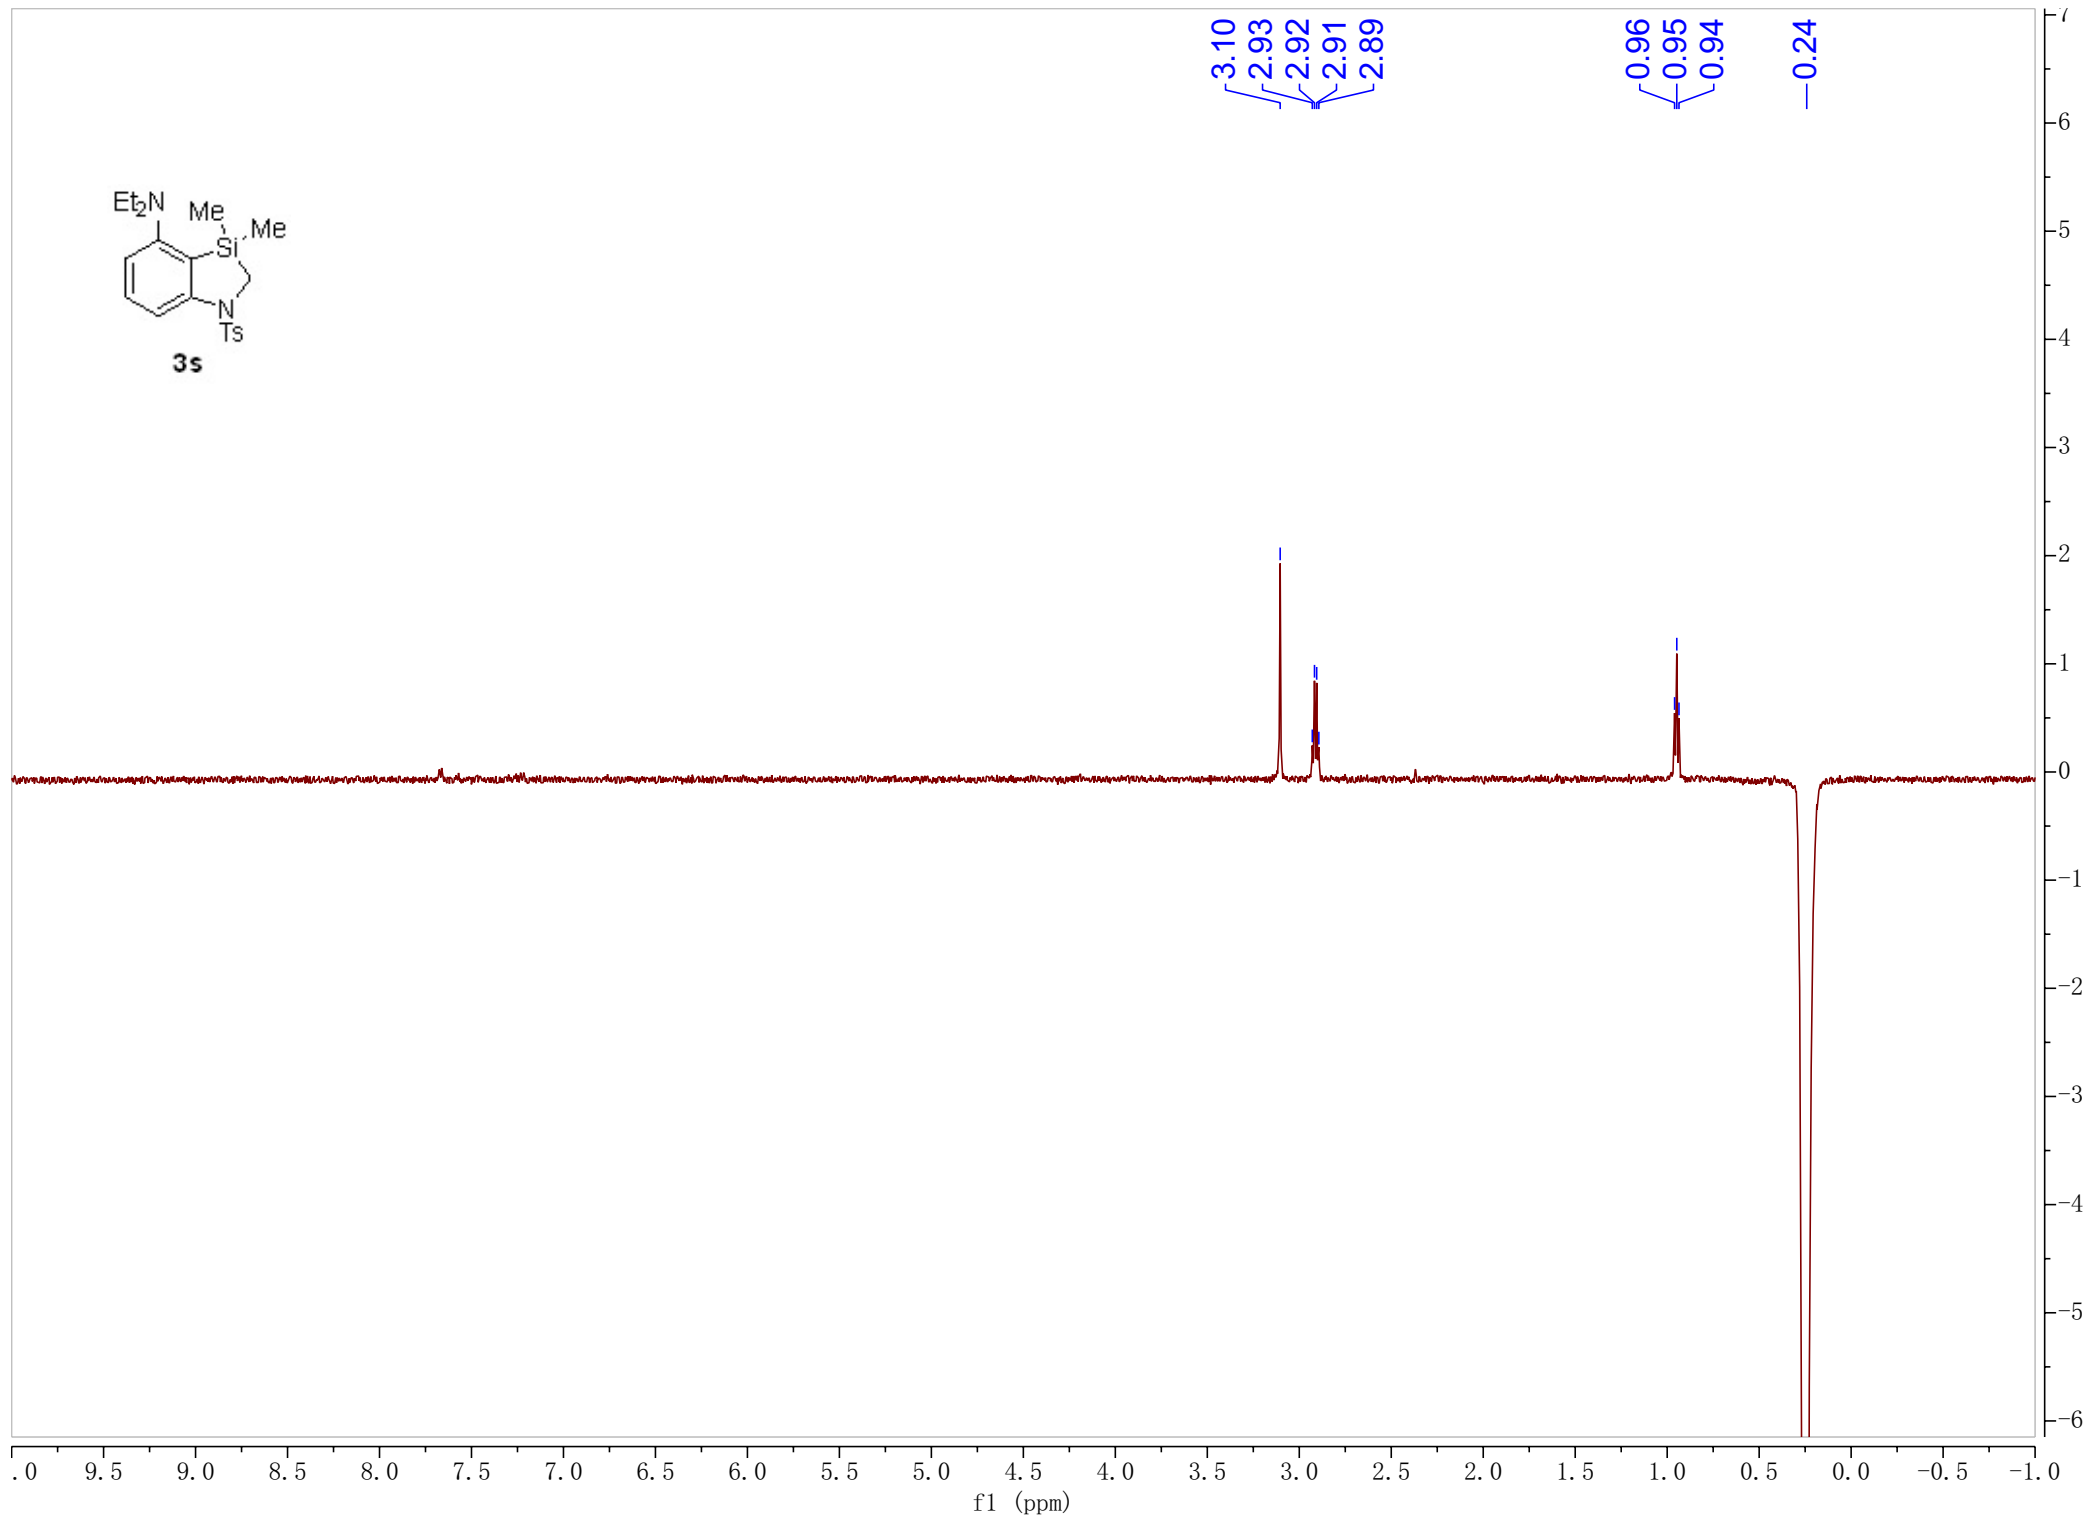



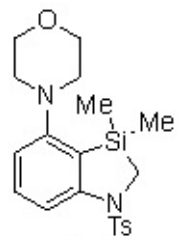

**3t**

7.70  
7.68  
7.67  
7.64  
7.35  
7.33  
7.31  
7.25  
7.23  
6.81  
6.79

3.79  
3.78  
3.77  
3.13  
2.88  
2.86  
2.85  
-2.38

-0.28

1.87  
0.94  
1.00  
1.90  
0.91

4.00  
2.13  
4.01  
3.01

6.25

9.5 9.0 8.5 8.0 7.5 7.0 6.5 6.0 5.5 5.0 4.5 4.0 3.5 3.0 2.5 2.0 1.5 1.0 0.5 0.0 -0.5 -1.0

f1 (ppm)

S209

25000

20000

15000

10000

5000

0

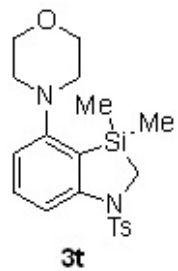

158.81  
151.42  
143.57  
135.35  
132.84  
129.51  
127.17  
124.21  
114.74  
113.72  
-67.39  
-53.83  
-38.69  
-21.49  
-1.71

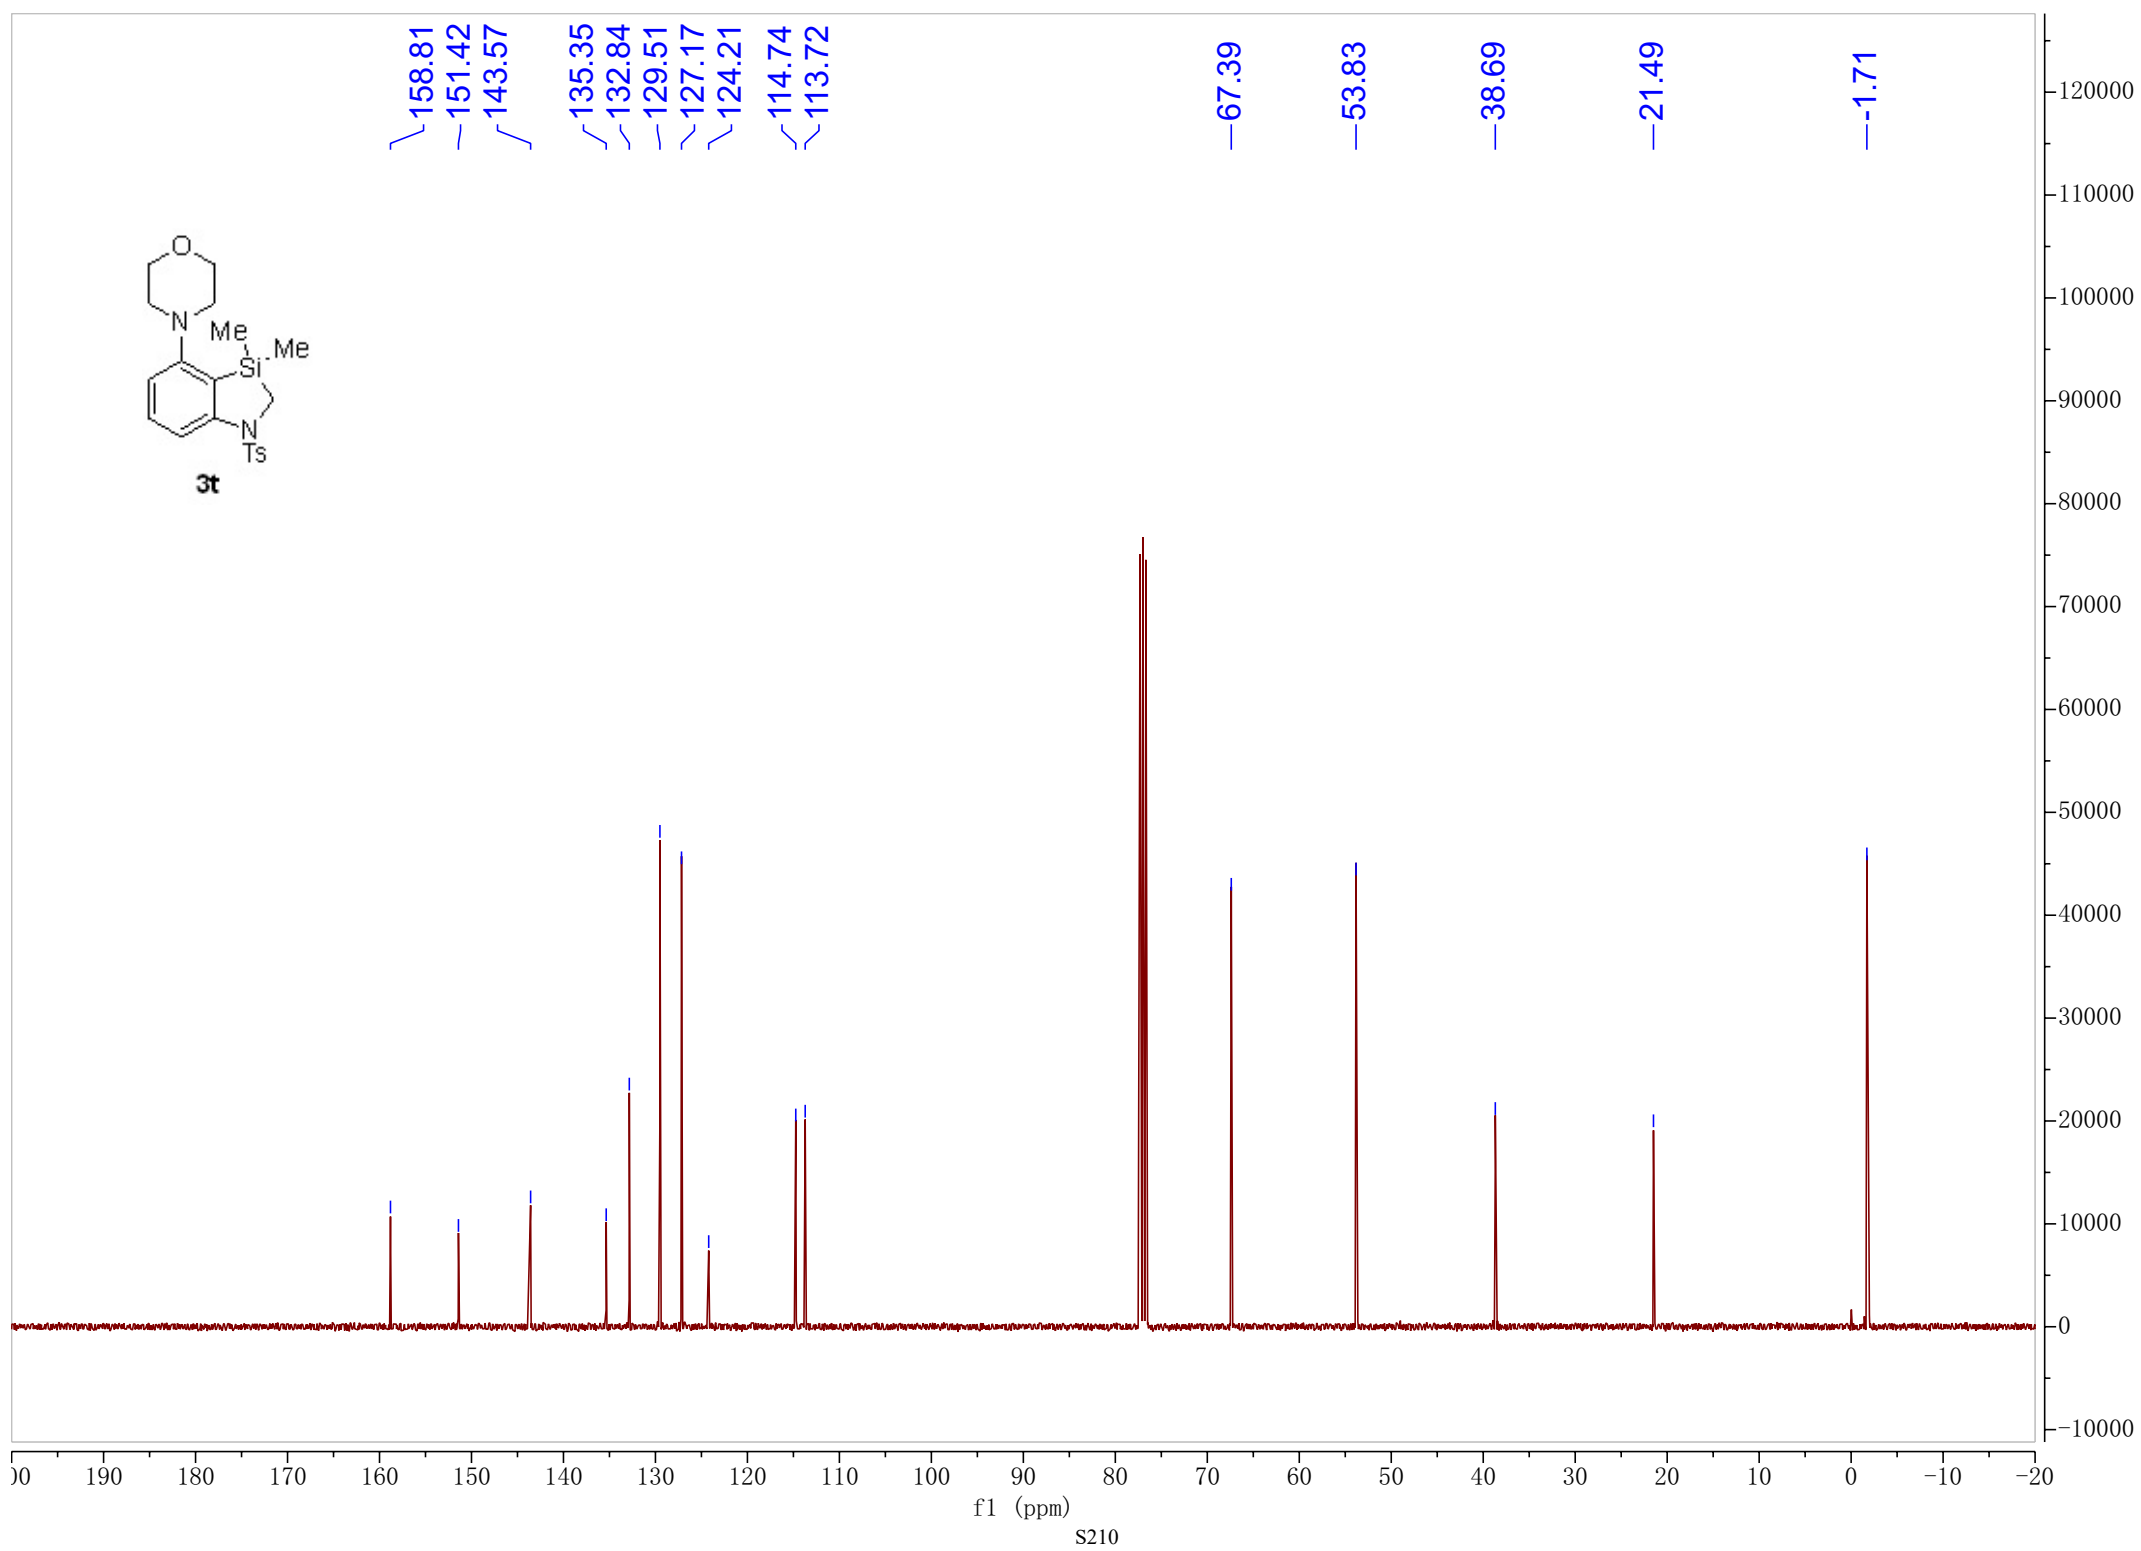

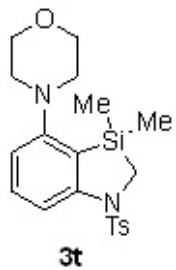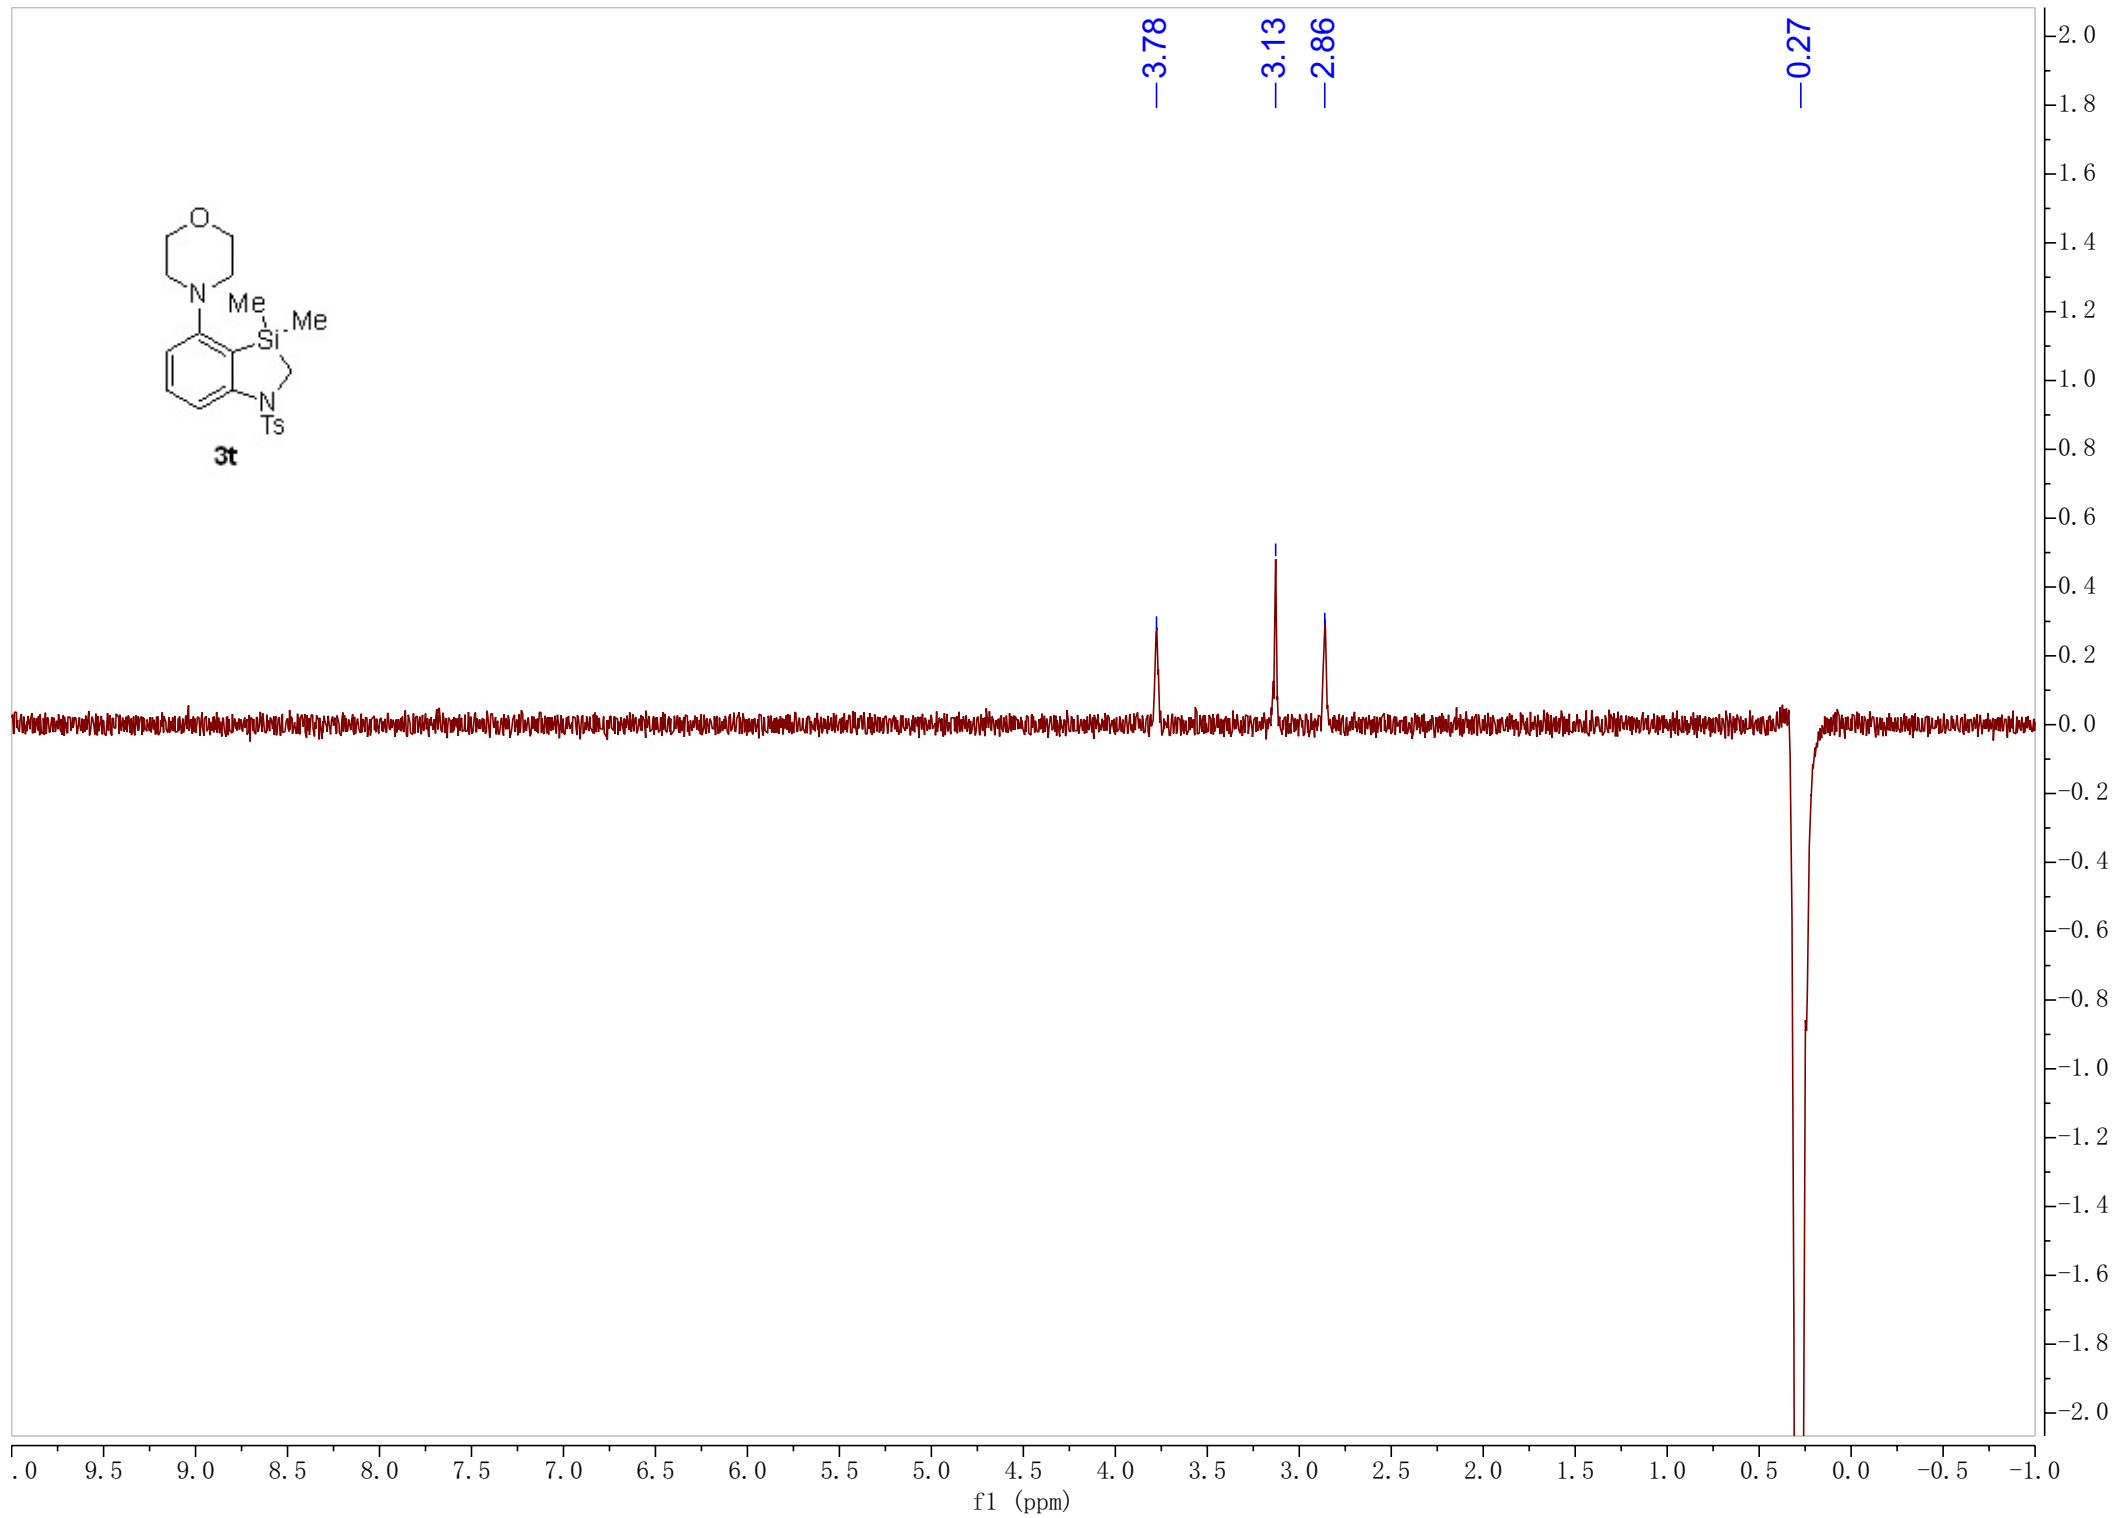

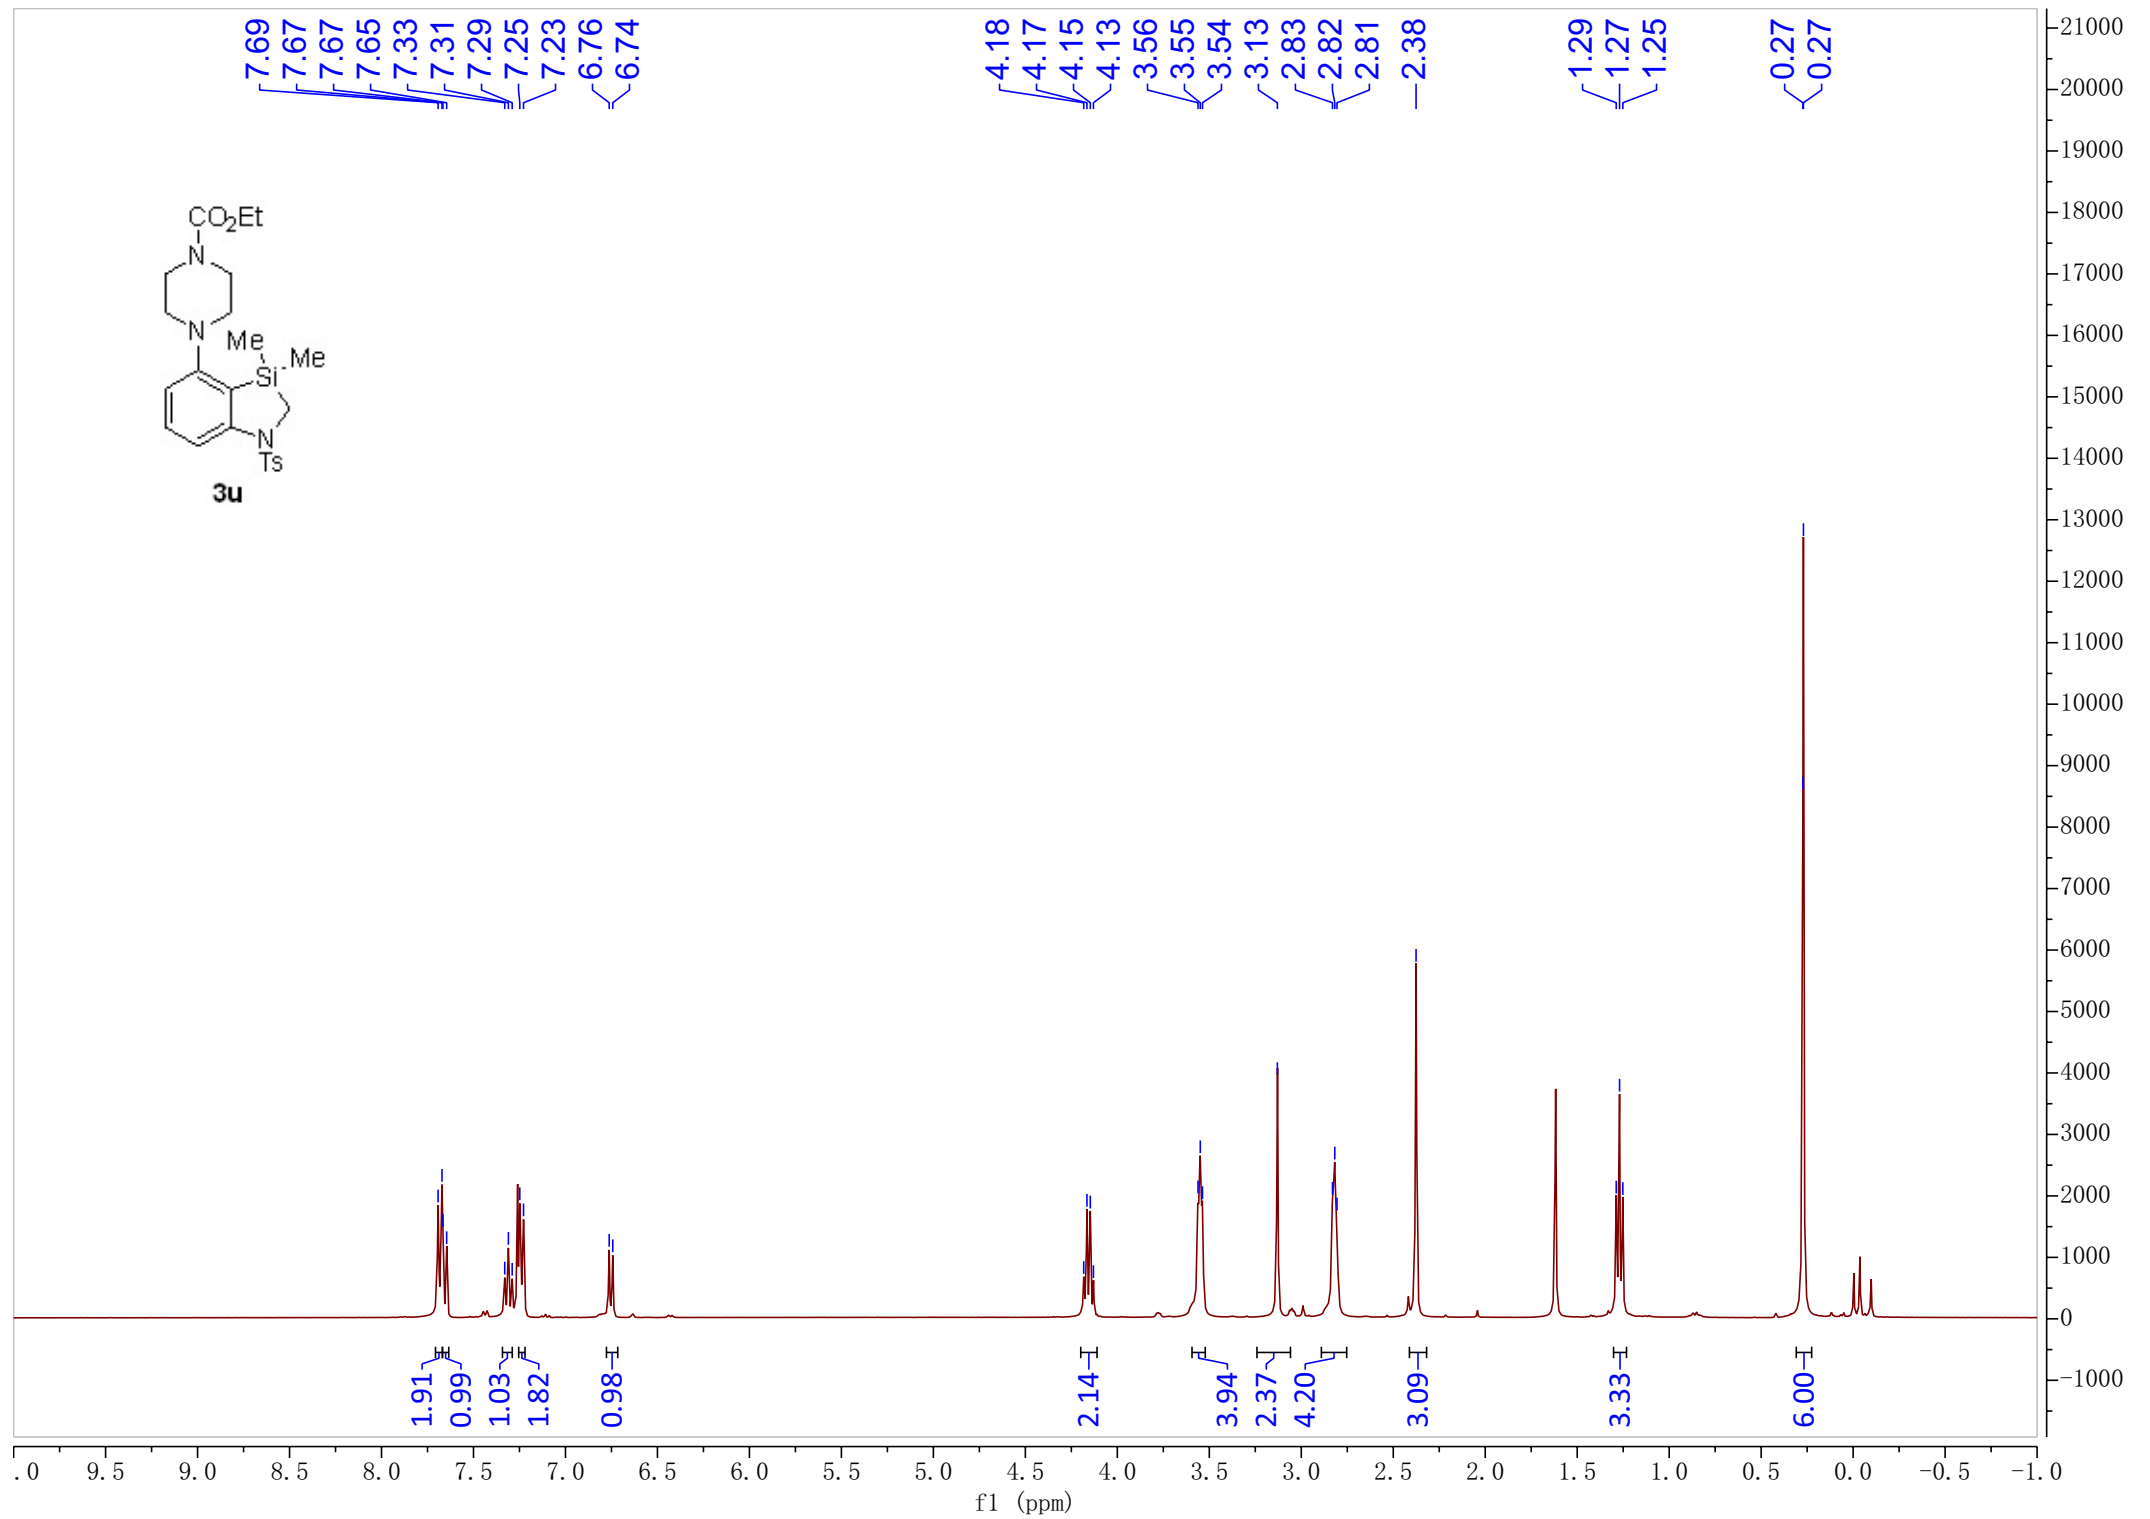

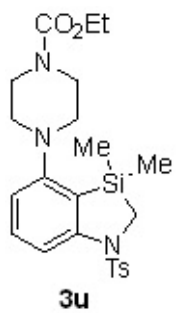

158.75  
155.59  
151.46  
143.60  
135.39  
132.84  
129.52  
127.17  
124.29  
114.80  
113.90

61.46  
53.32  
44.21  
38.68  
21.49  
14.66  
-1.72

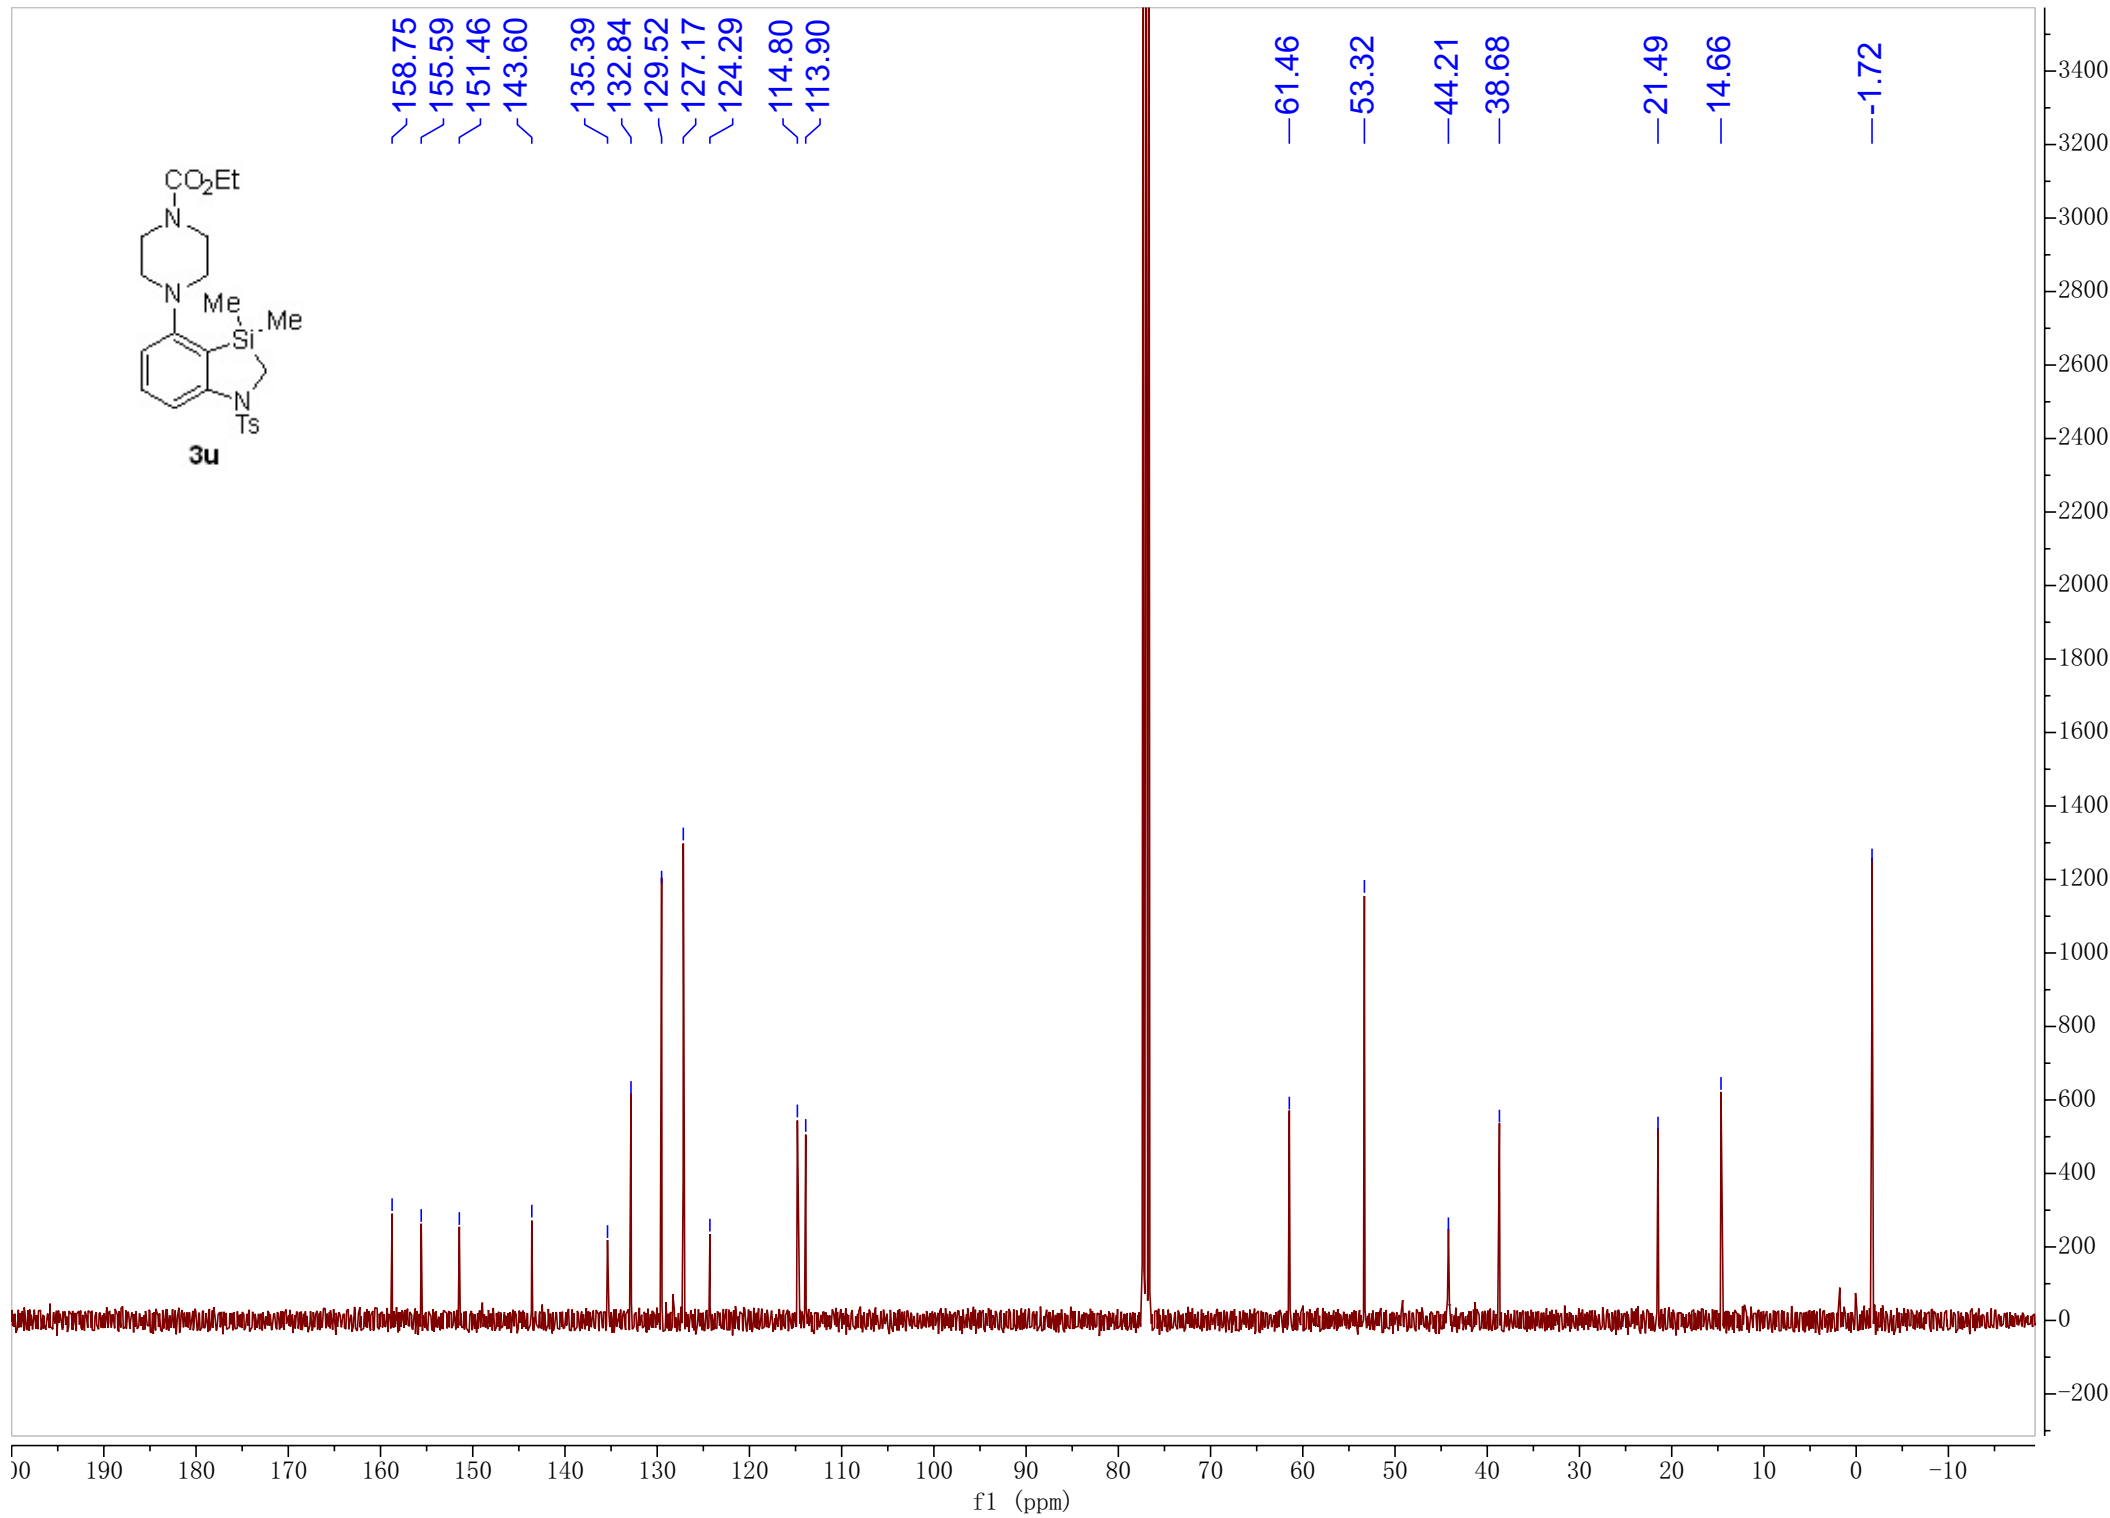

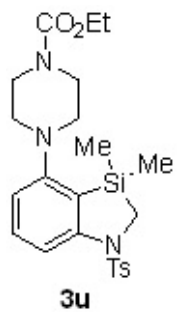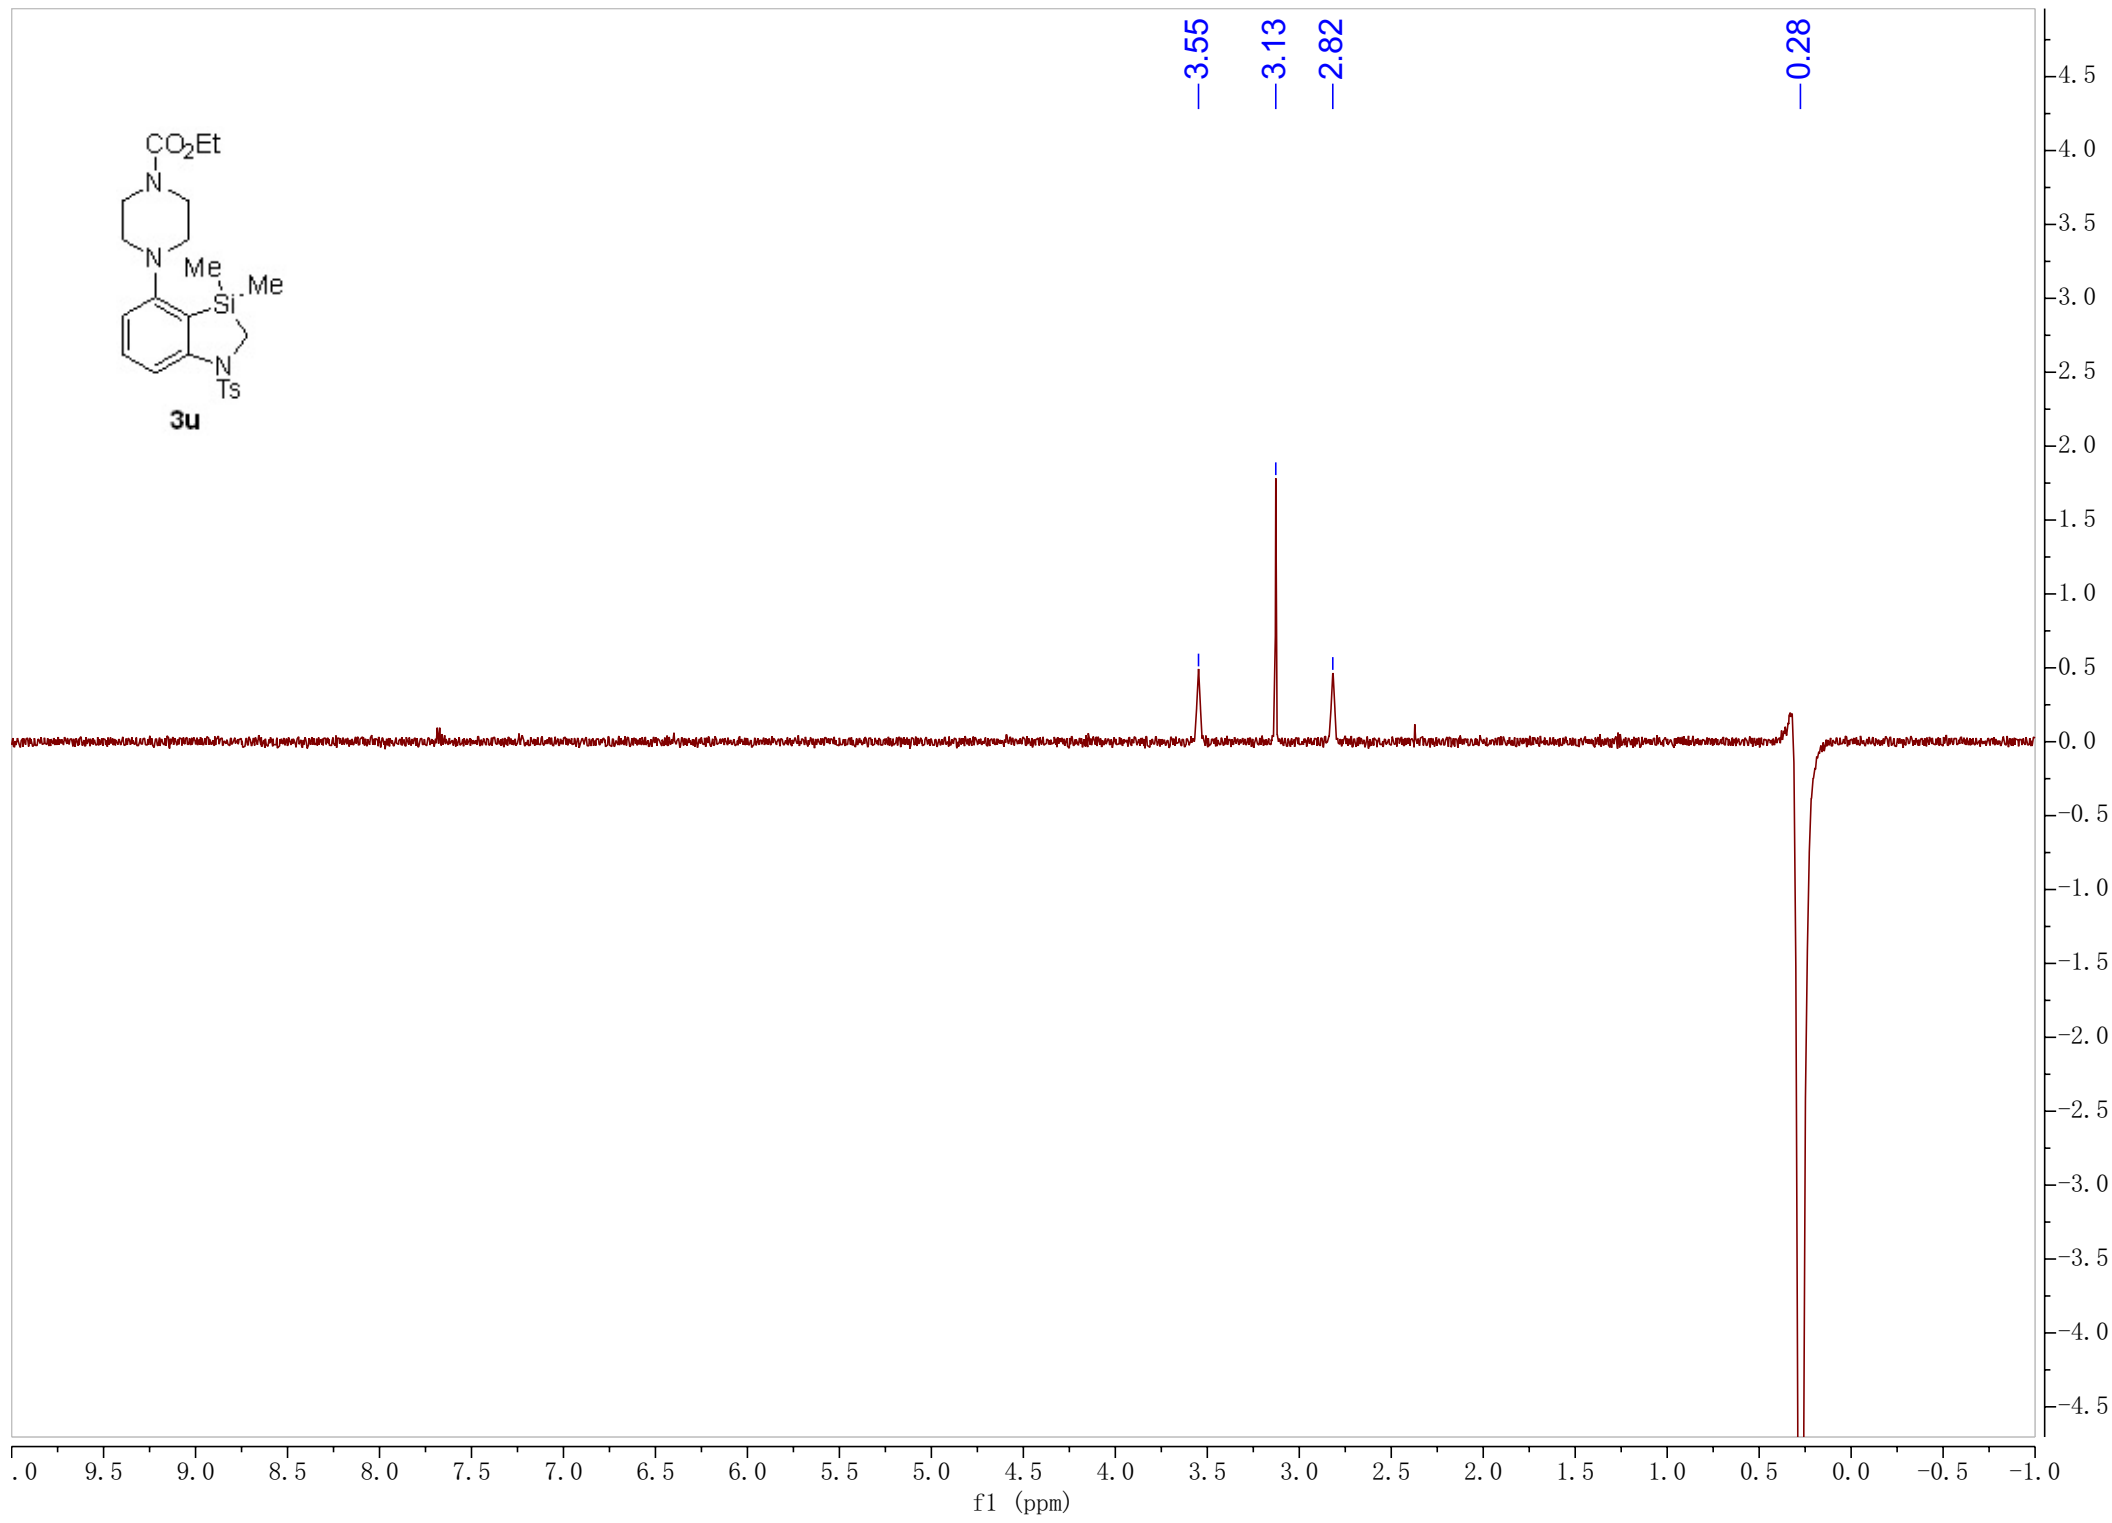

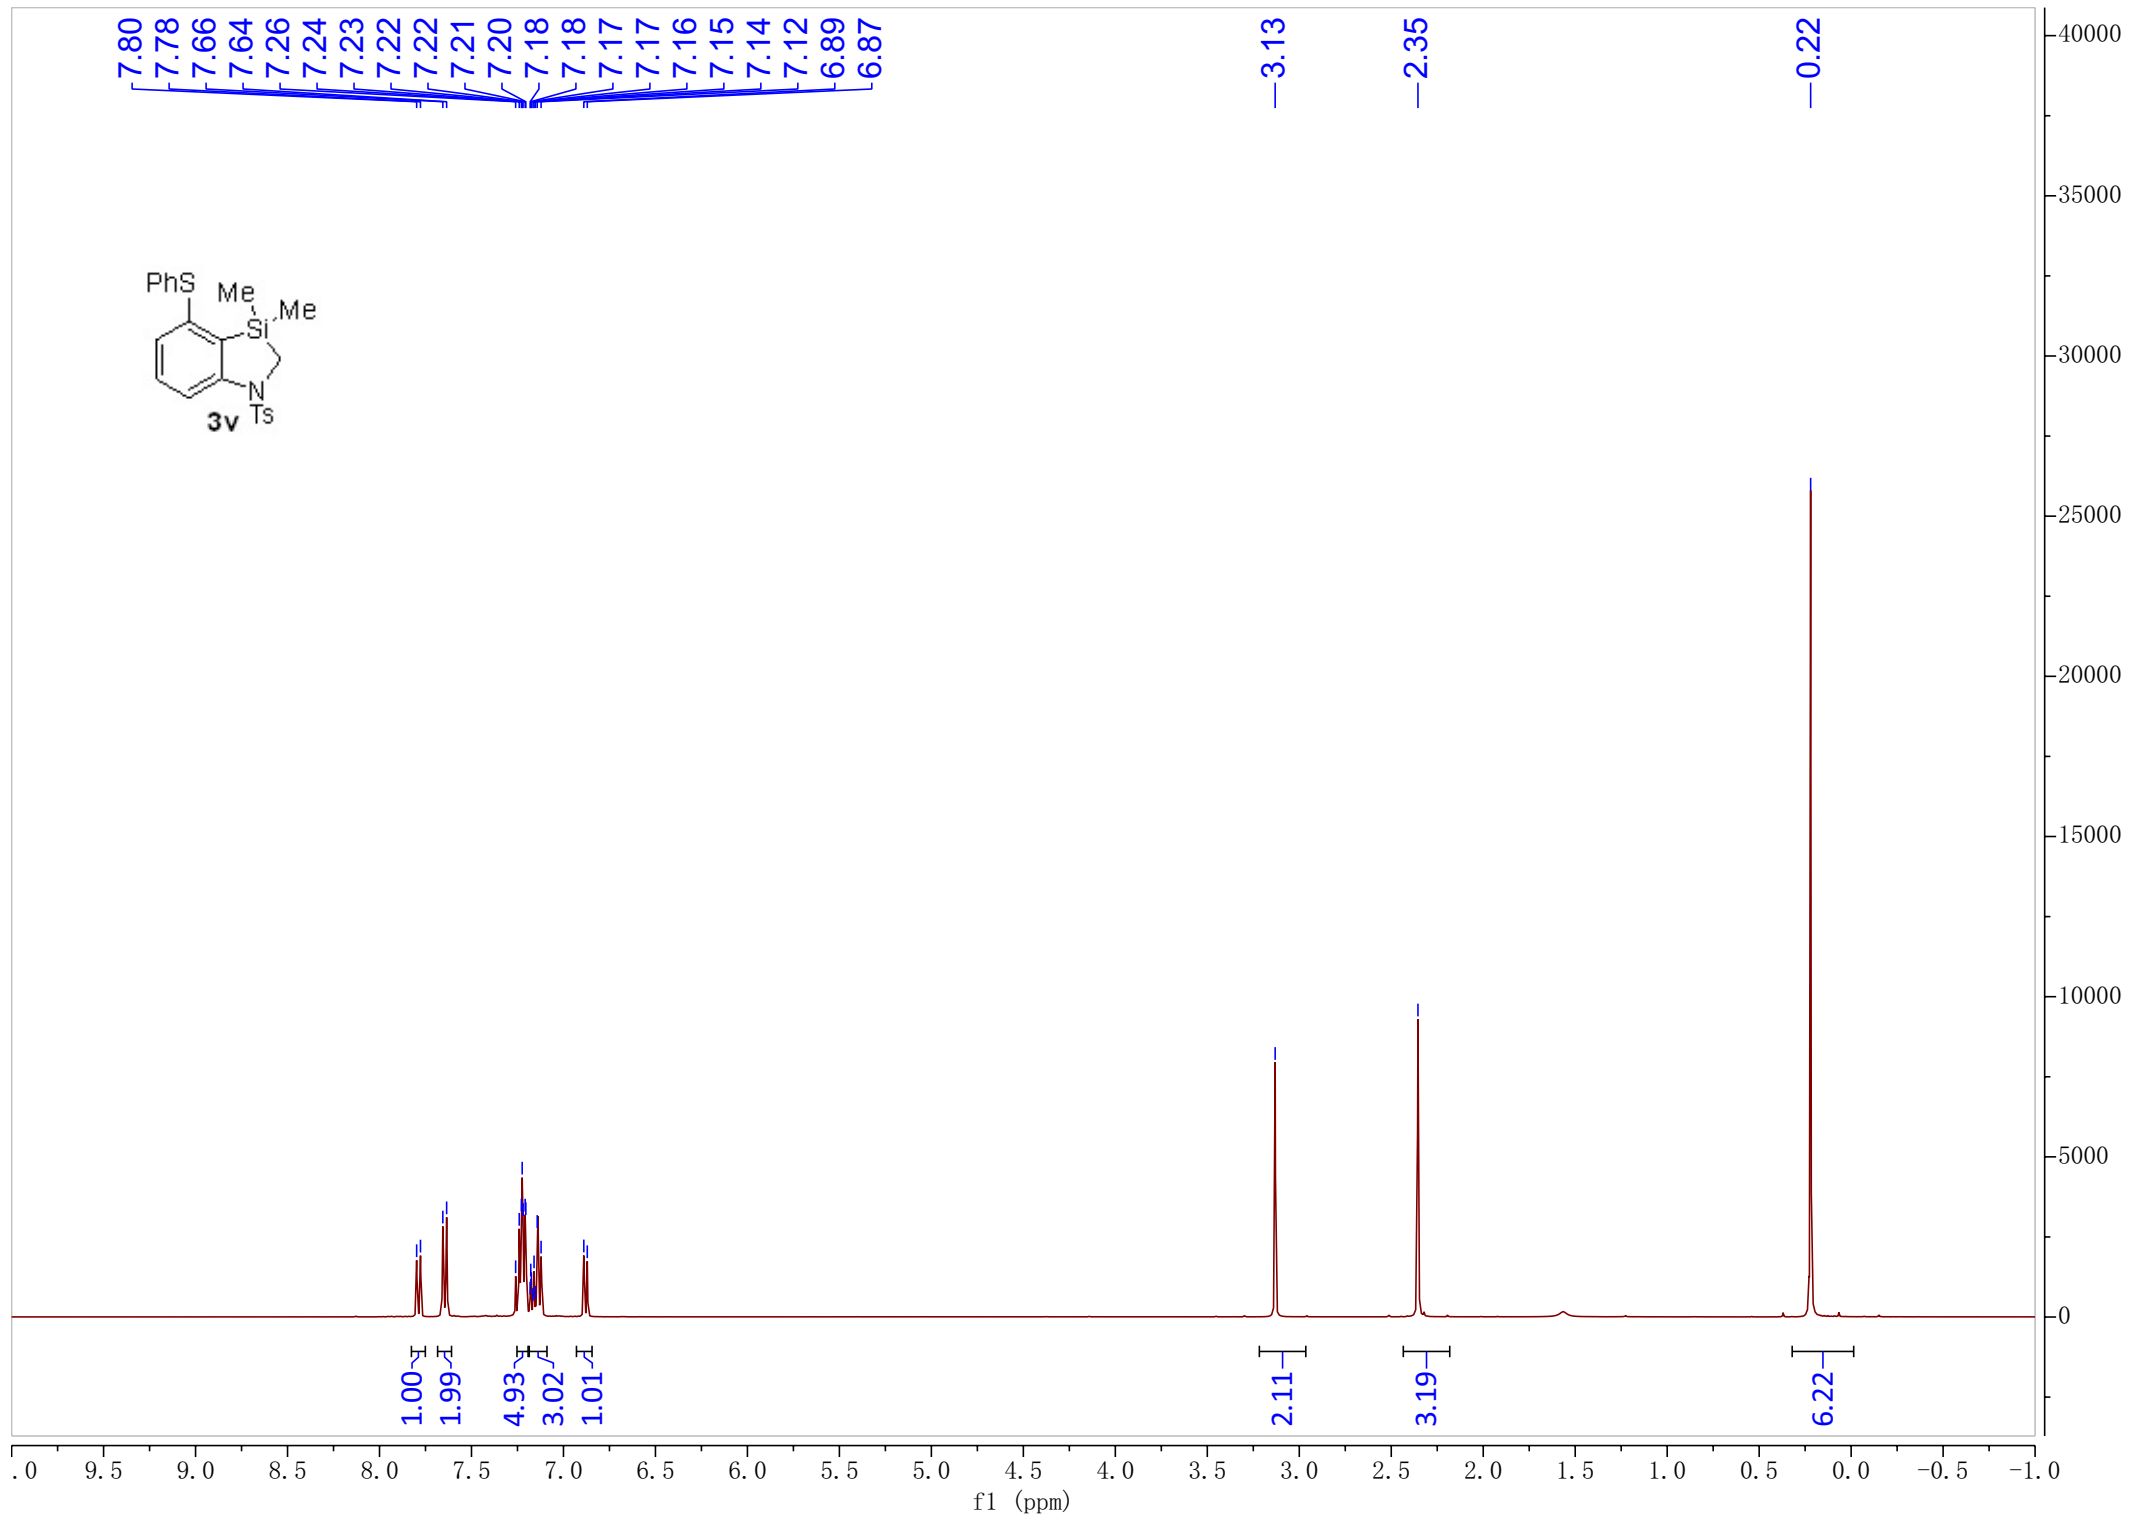

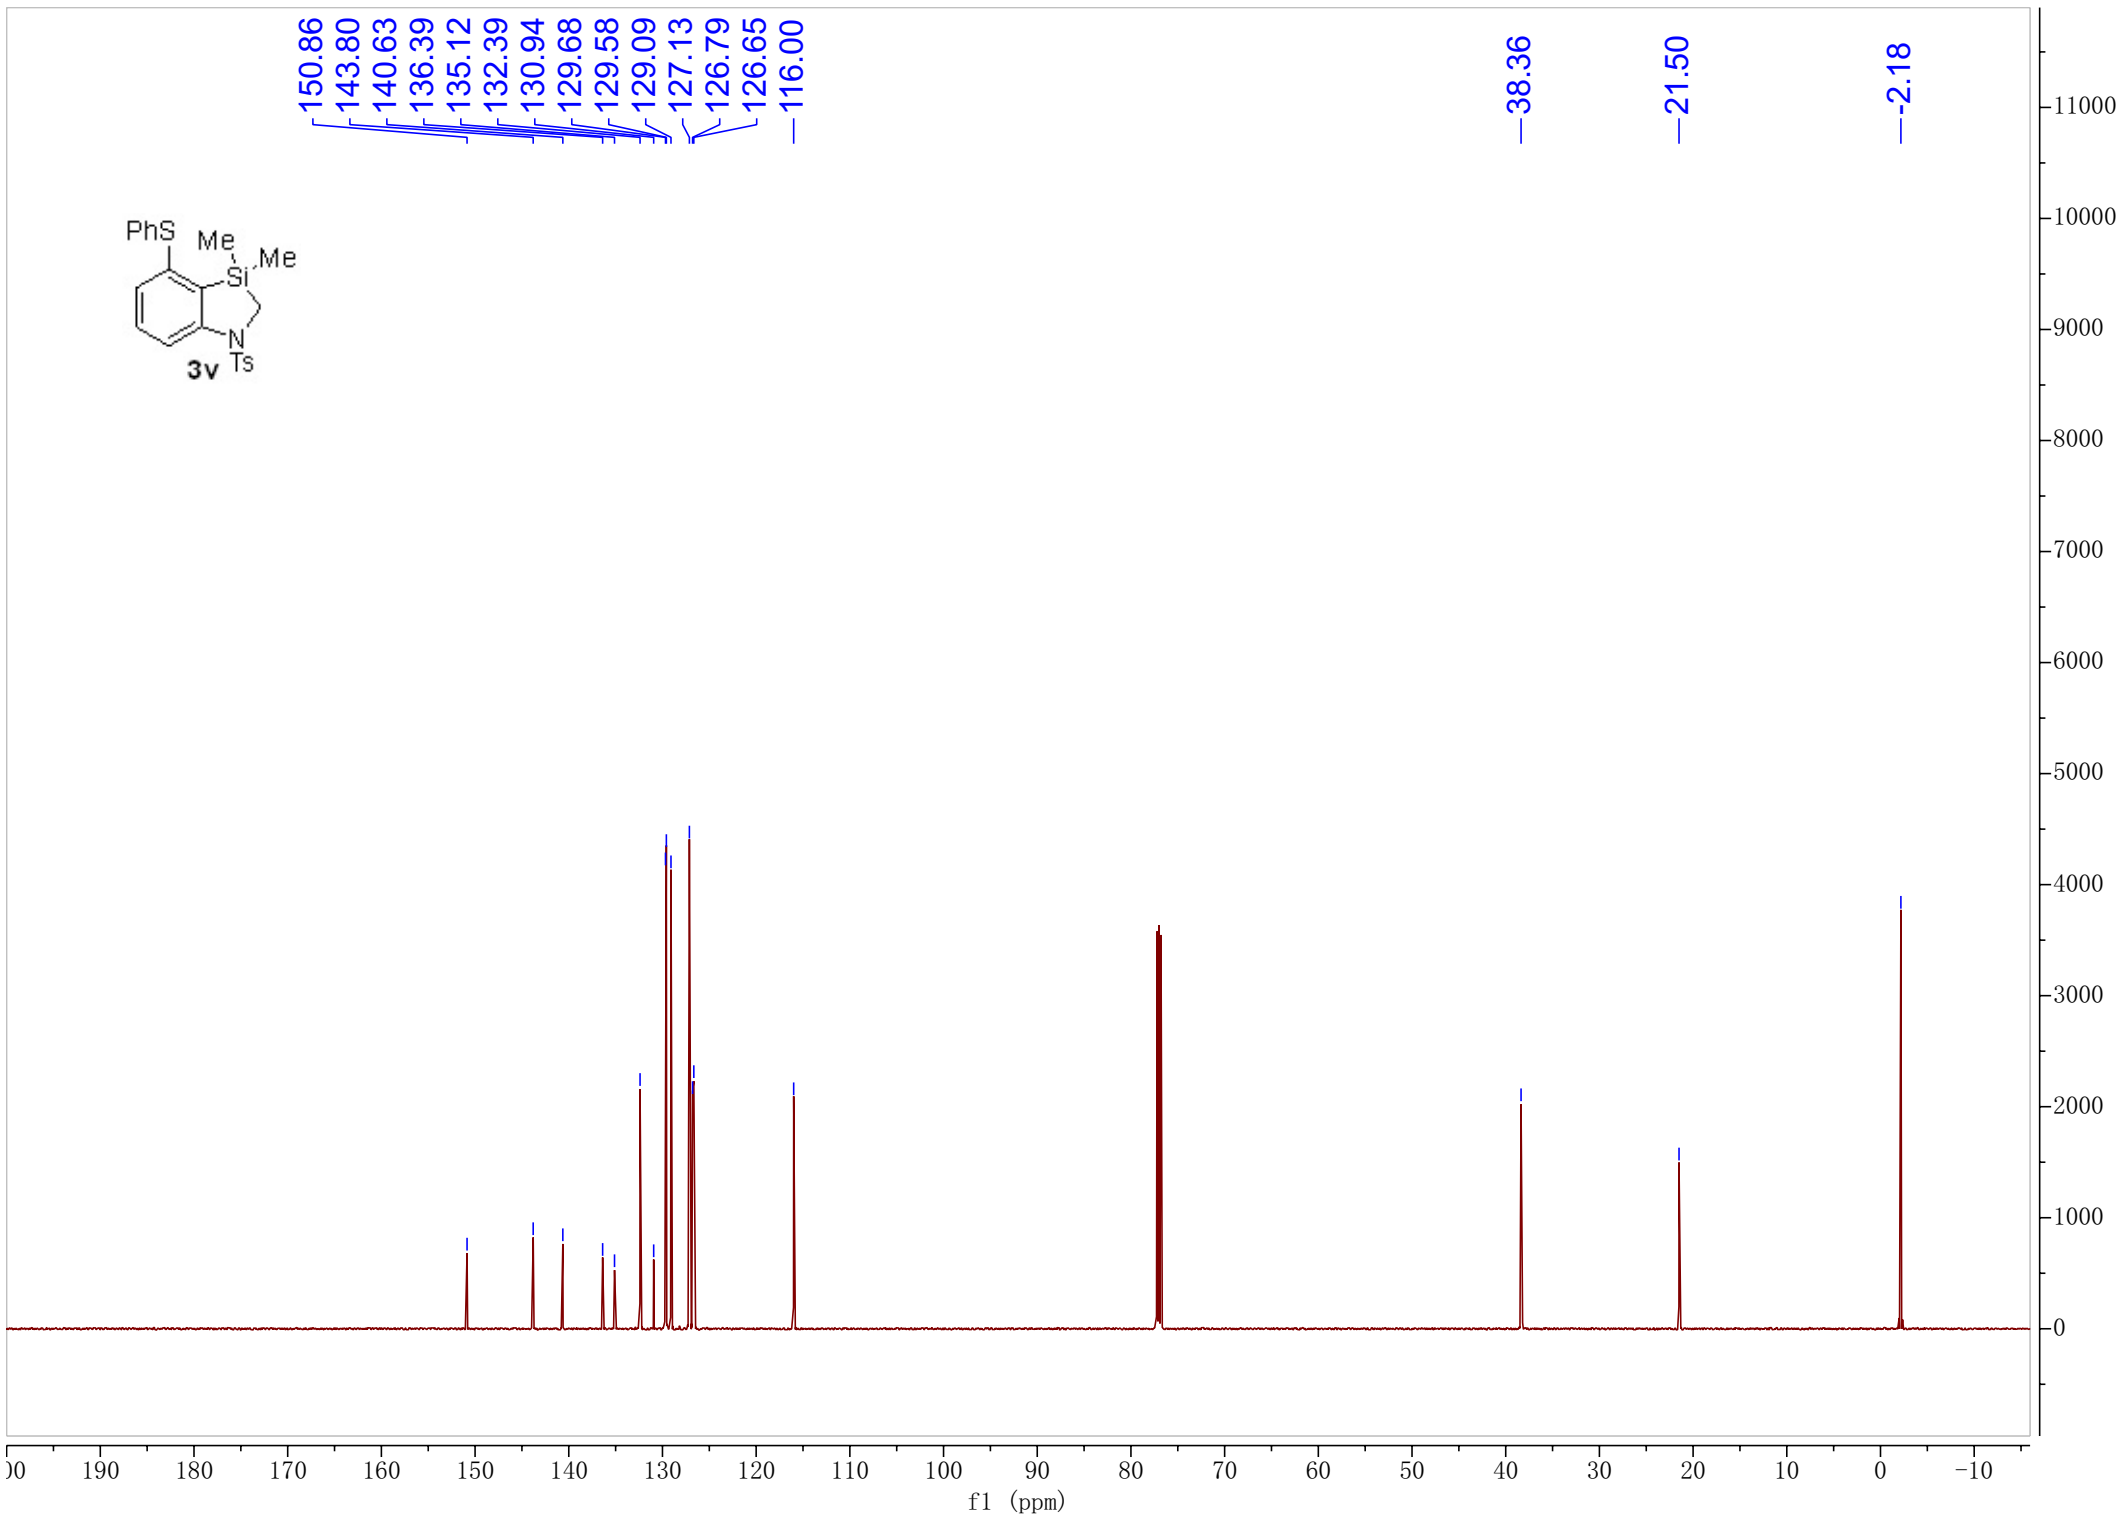



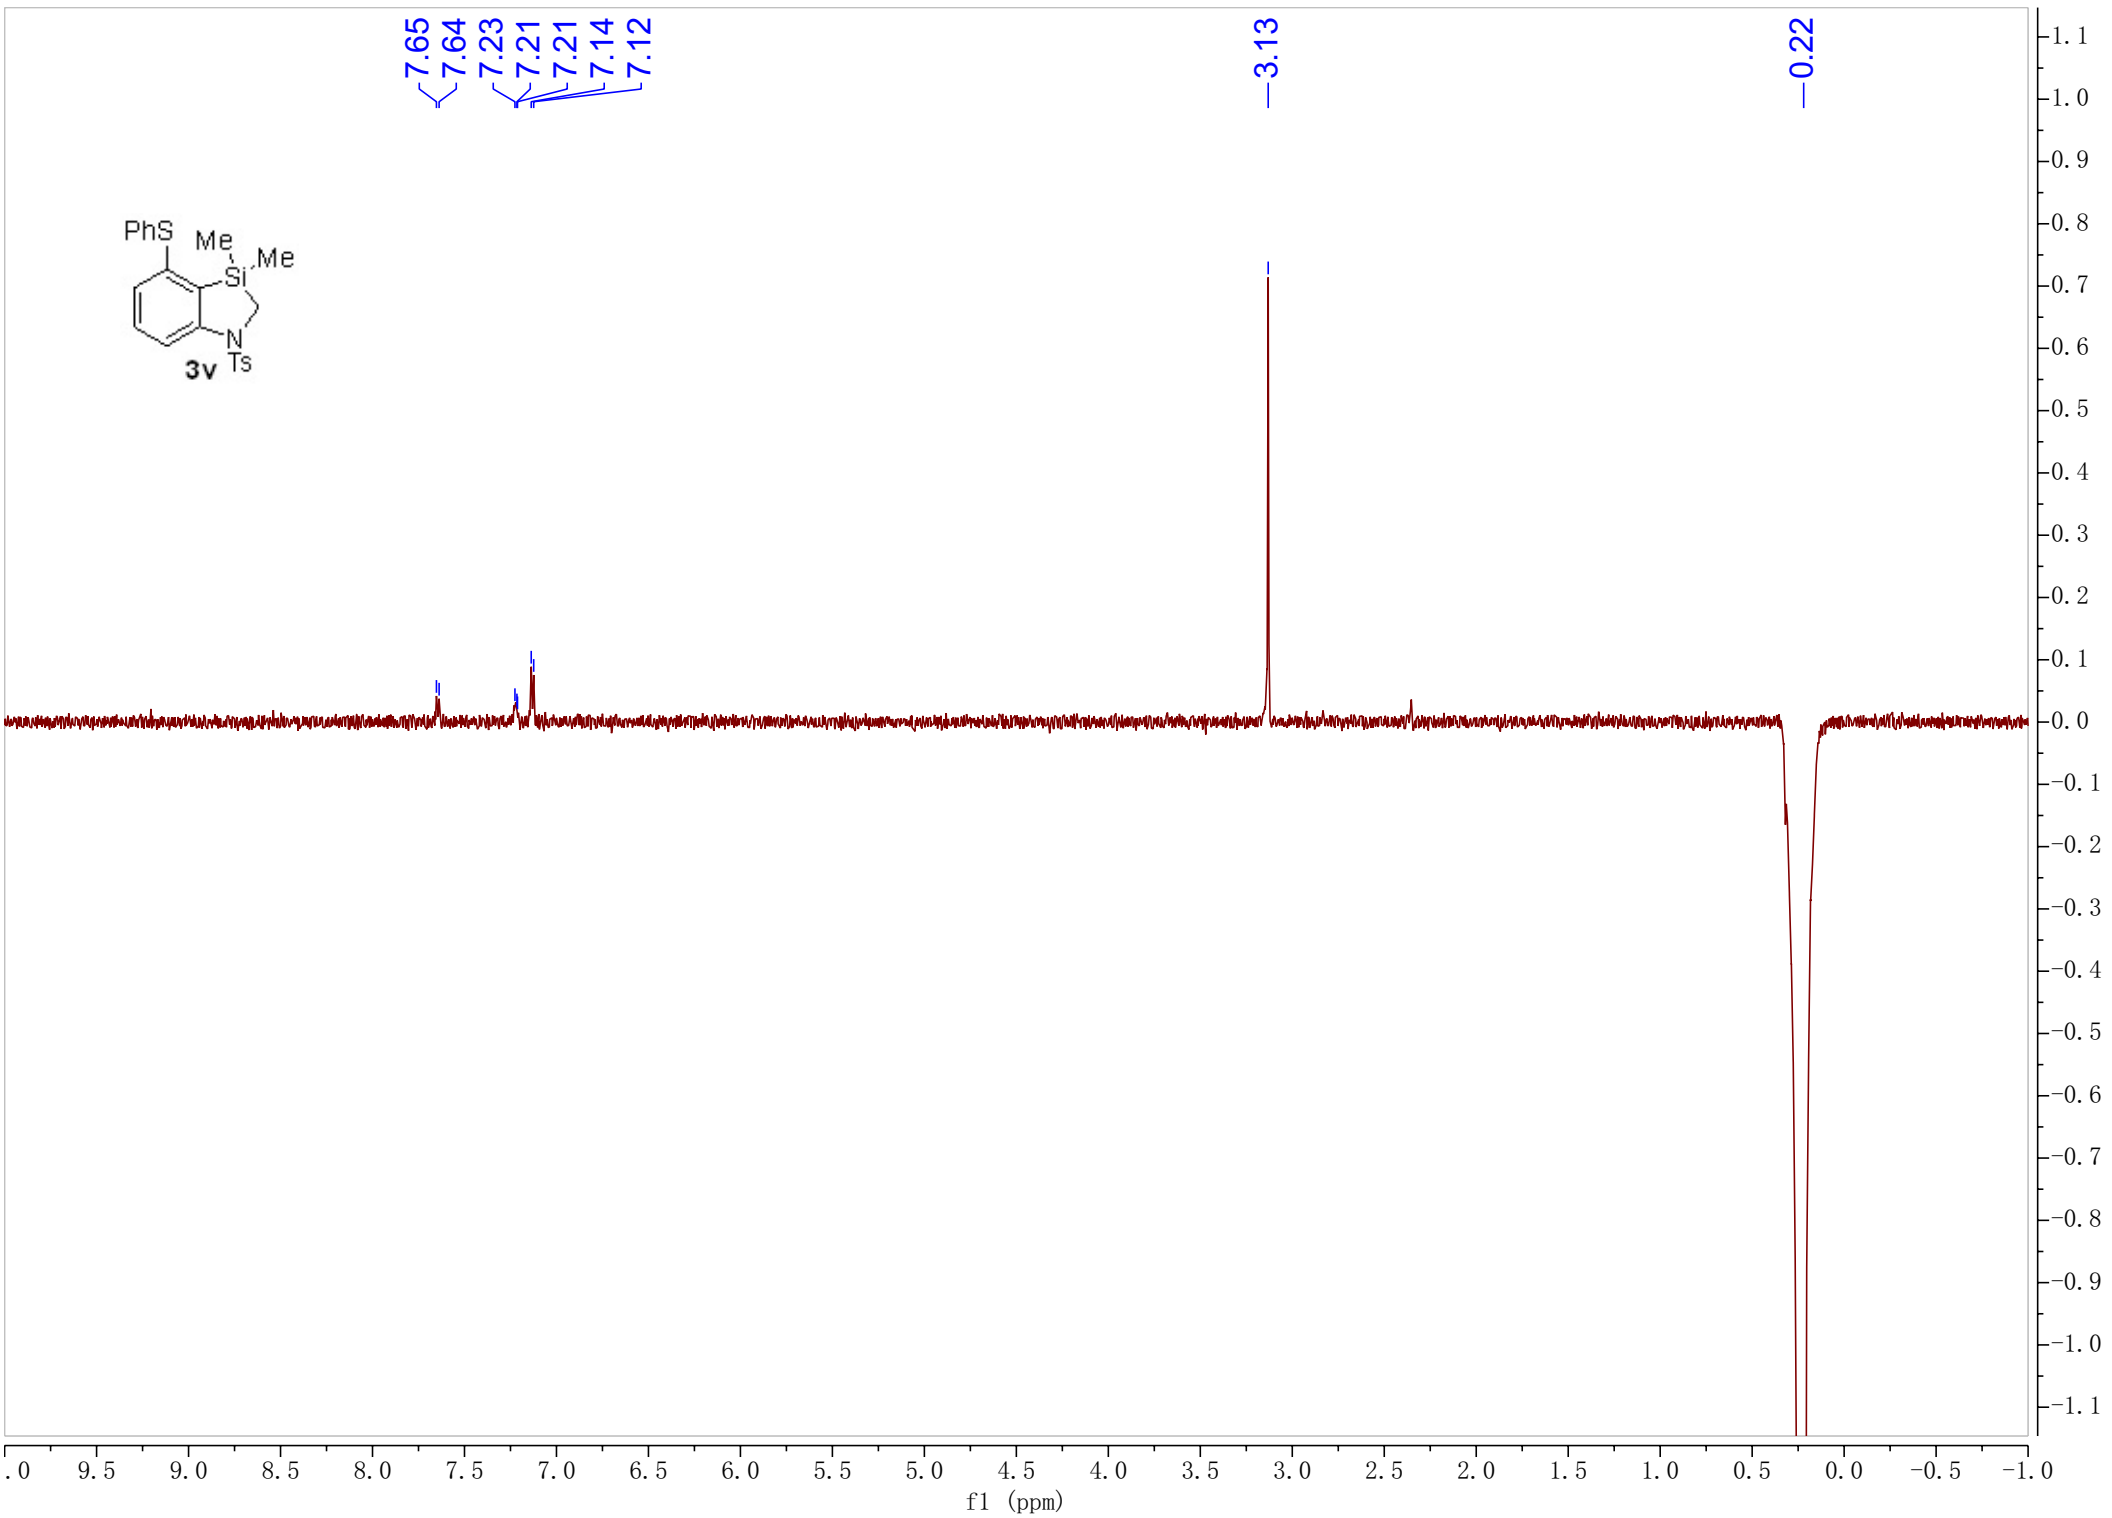

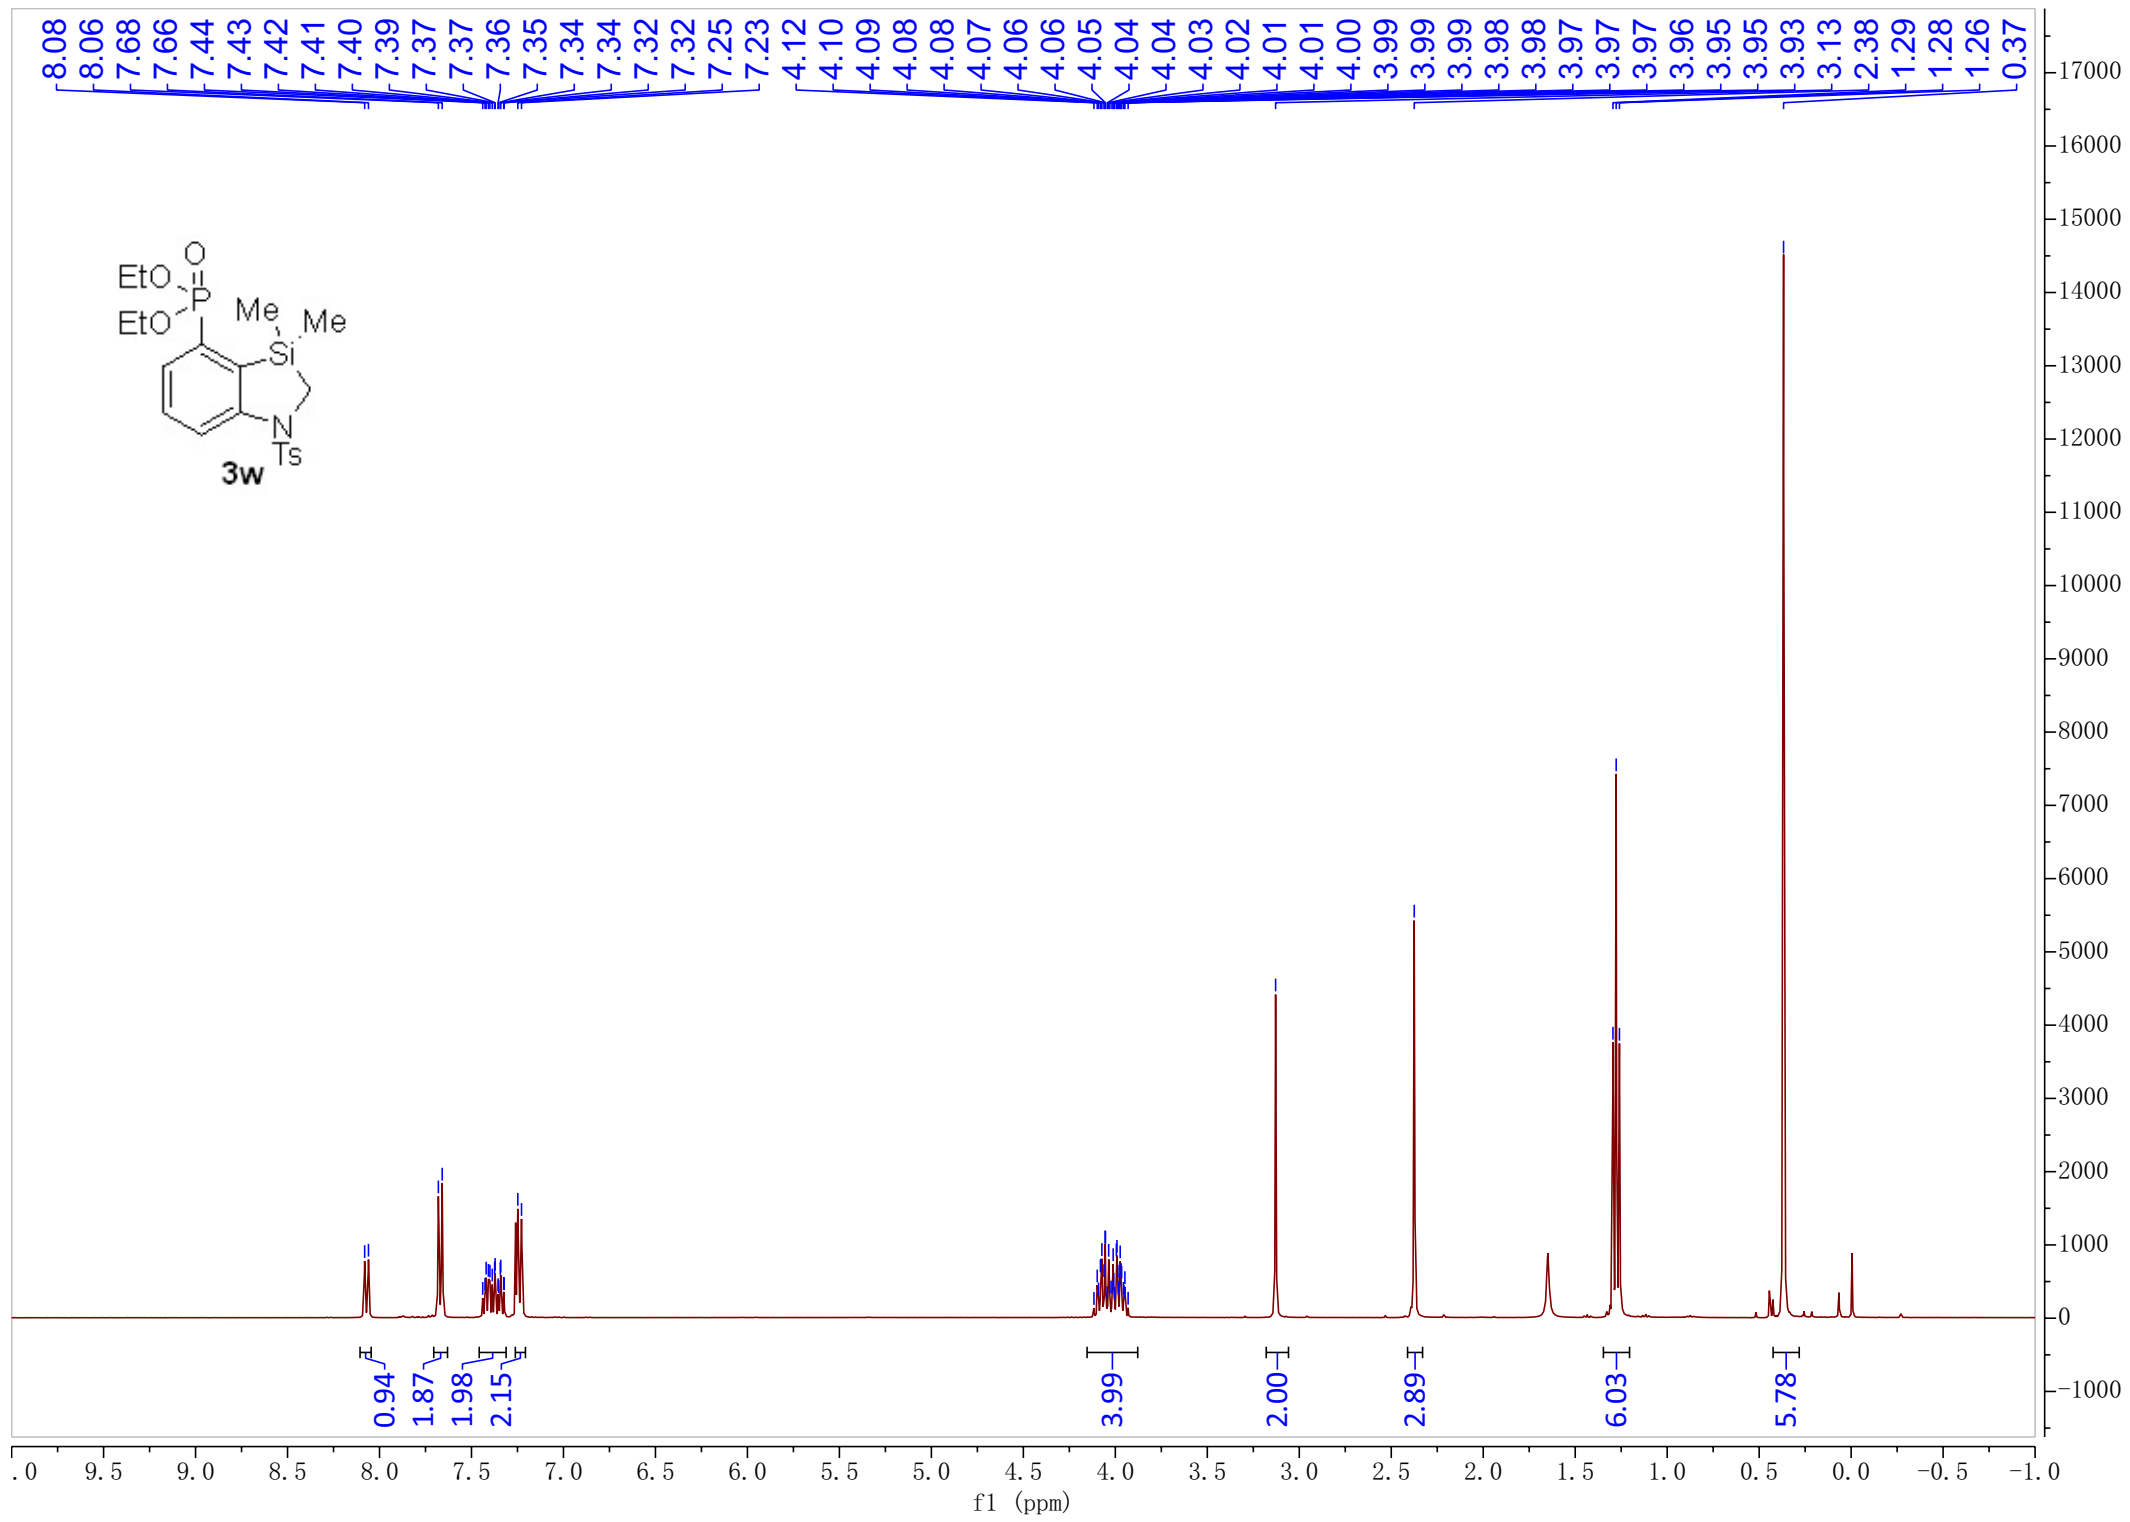

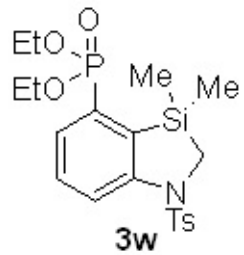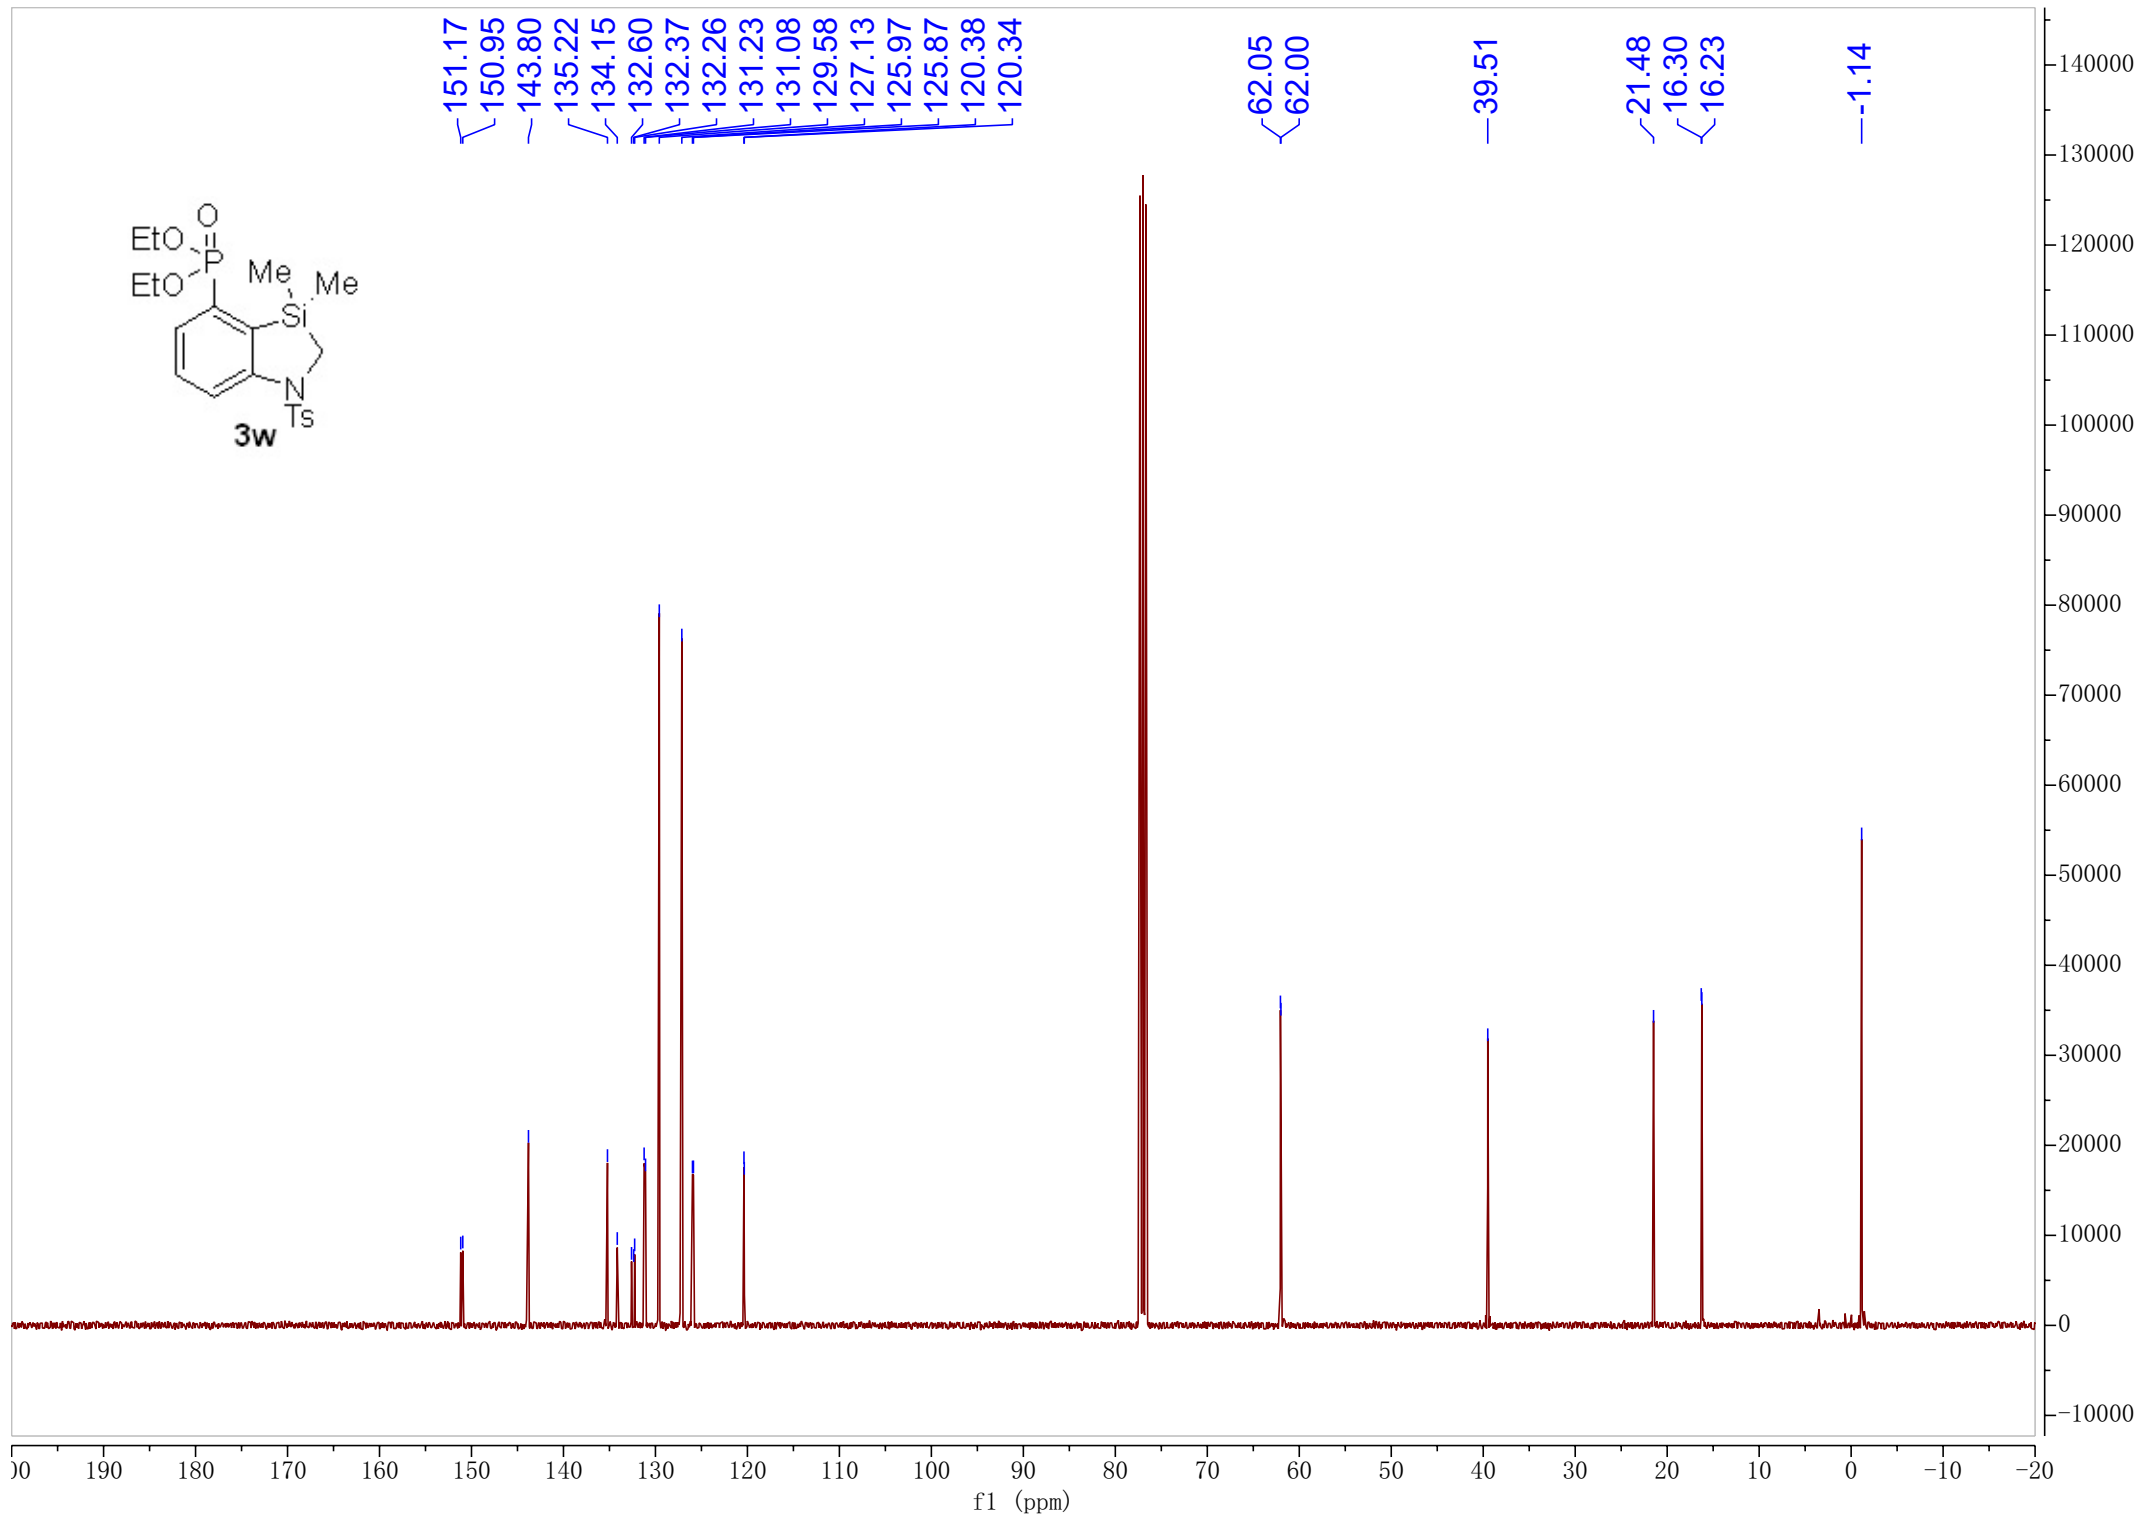

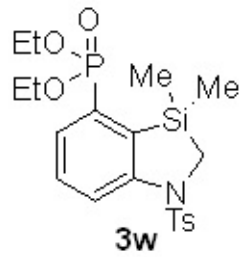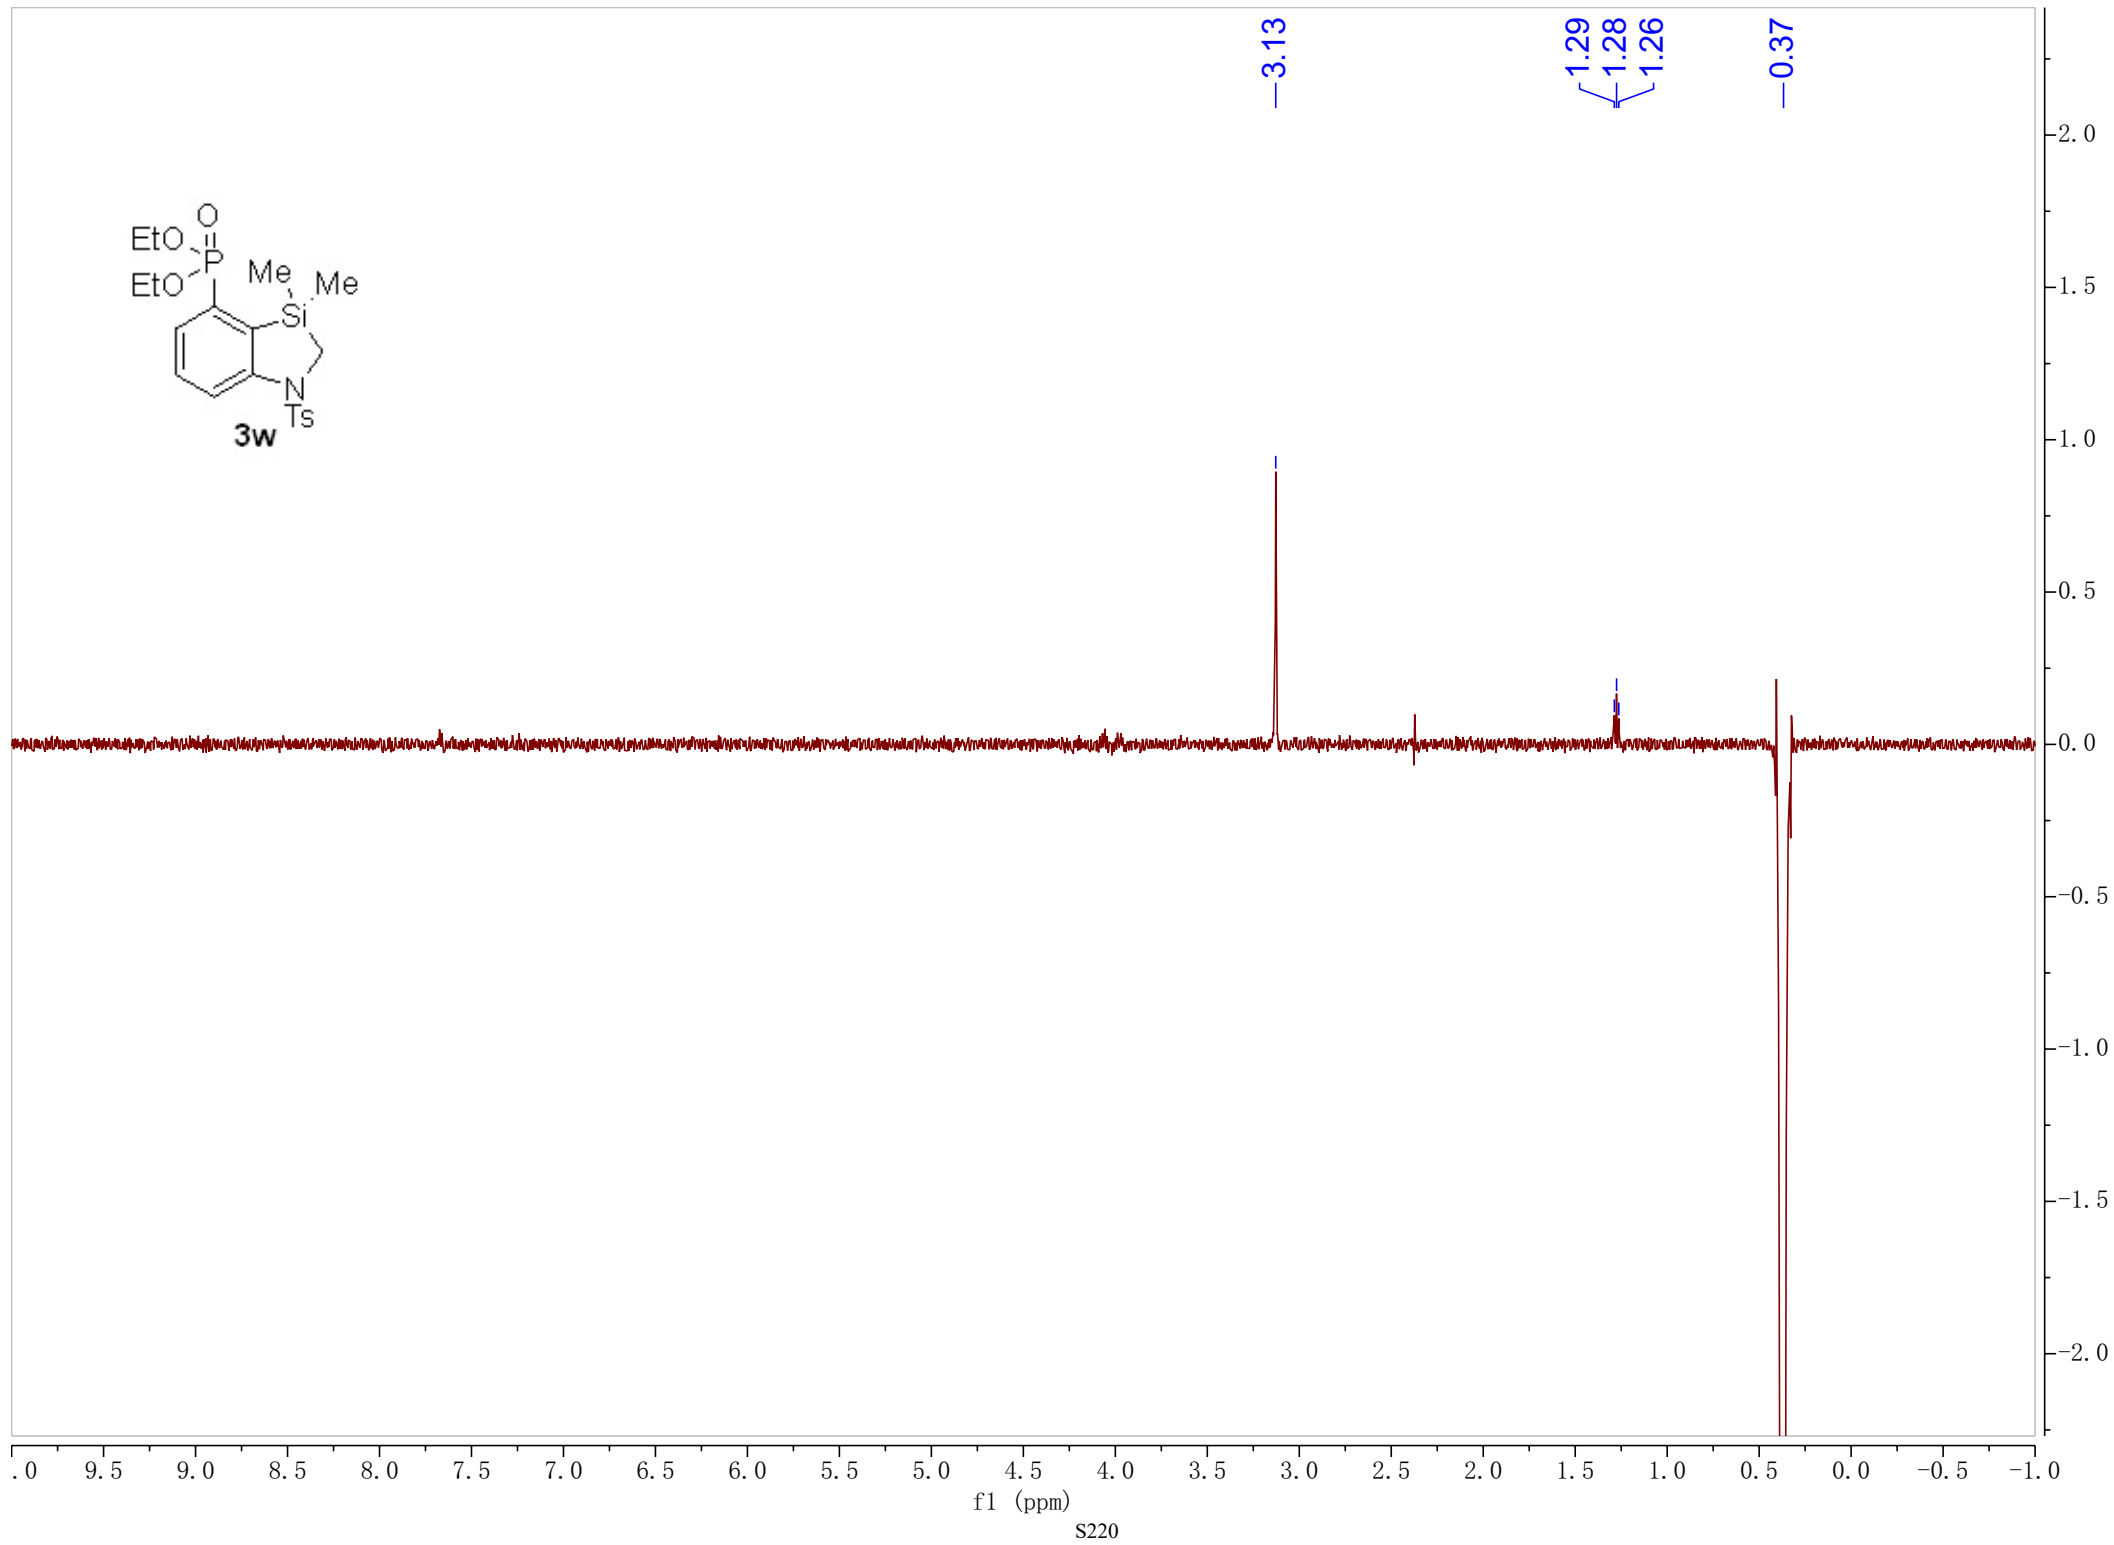

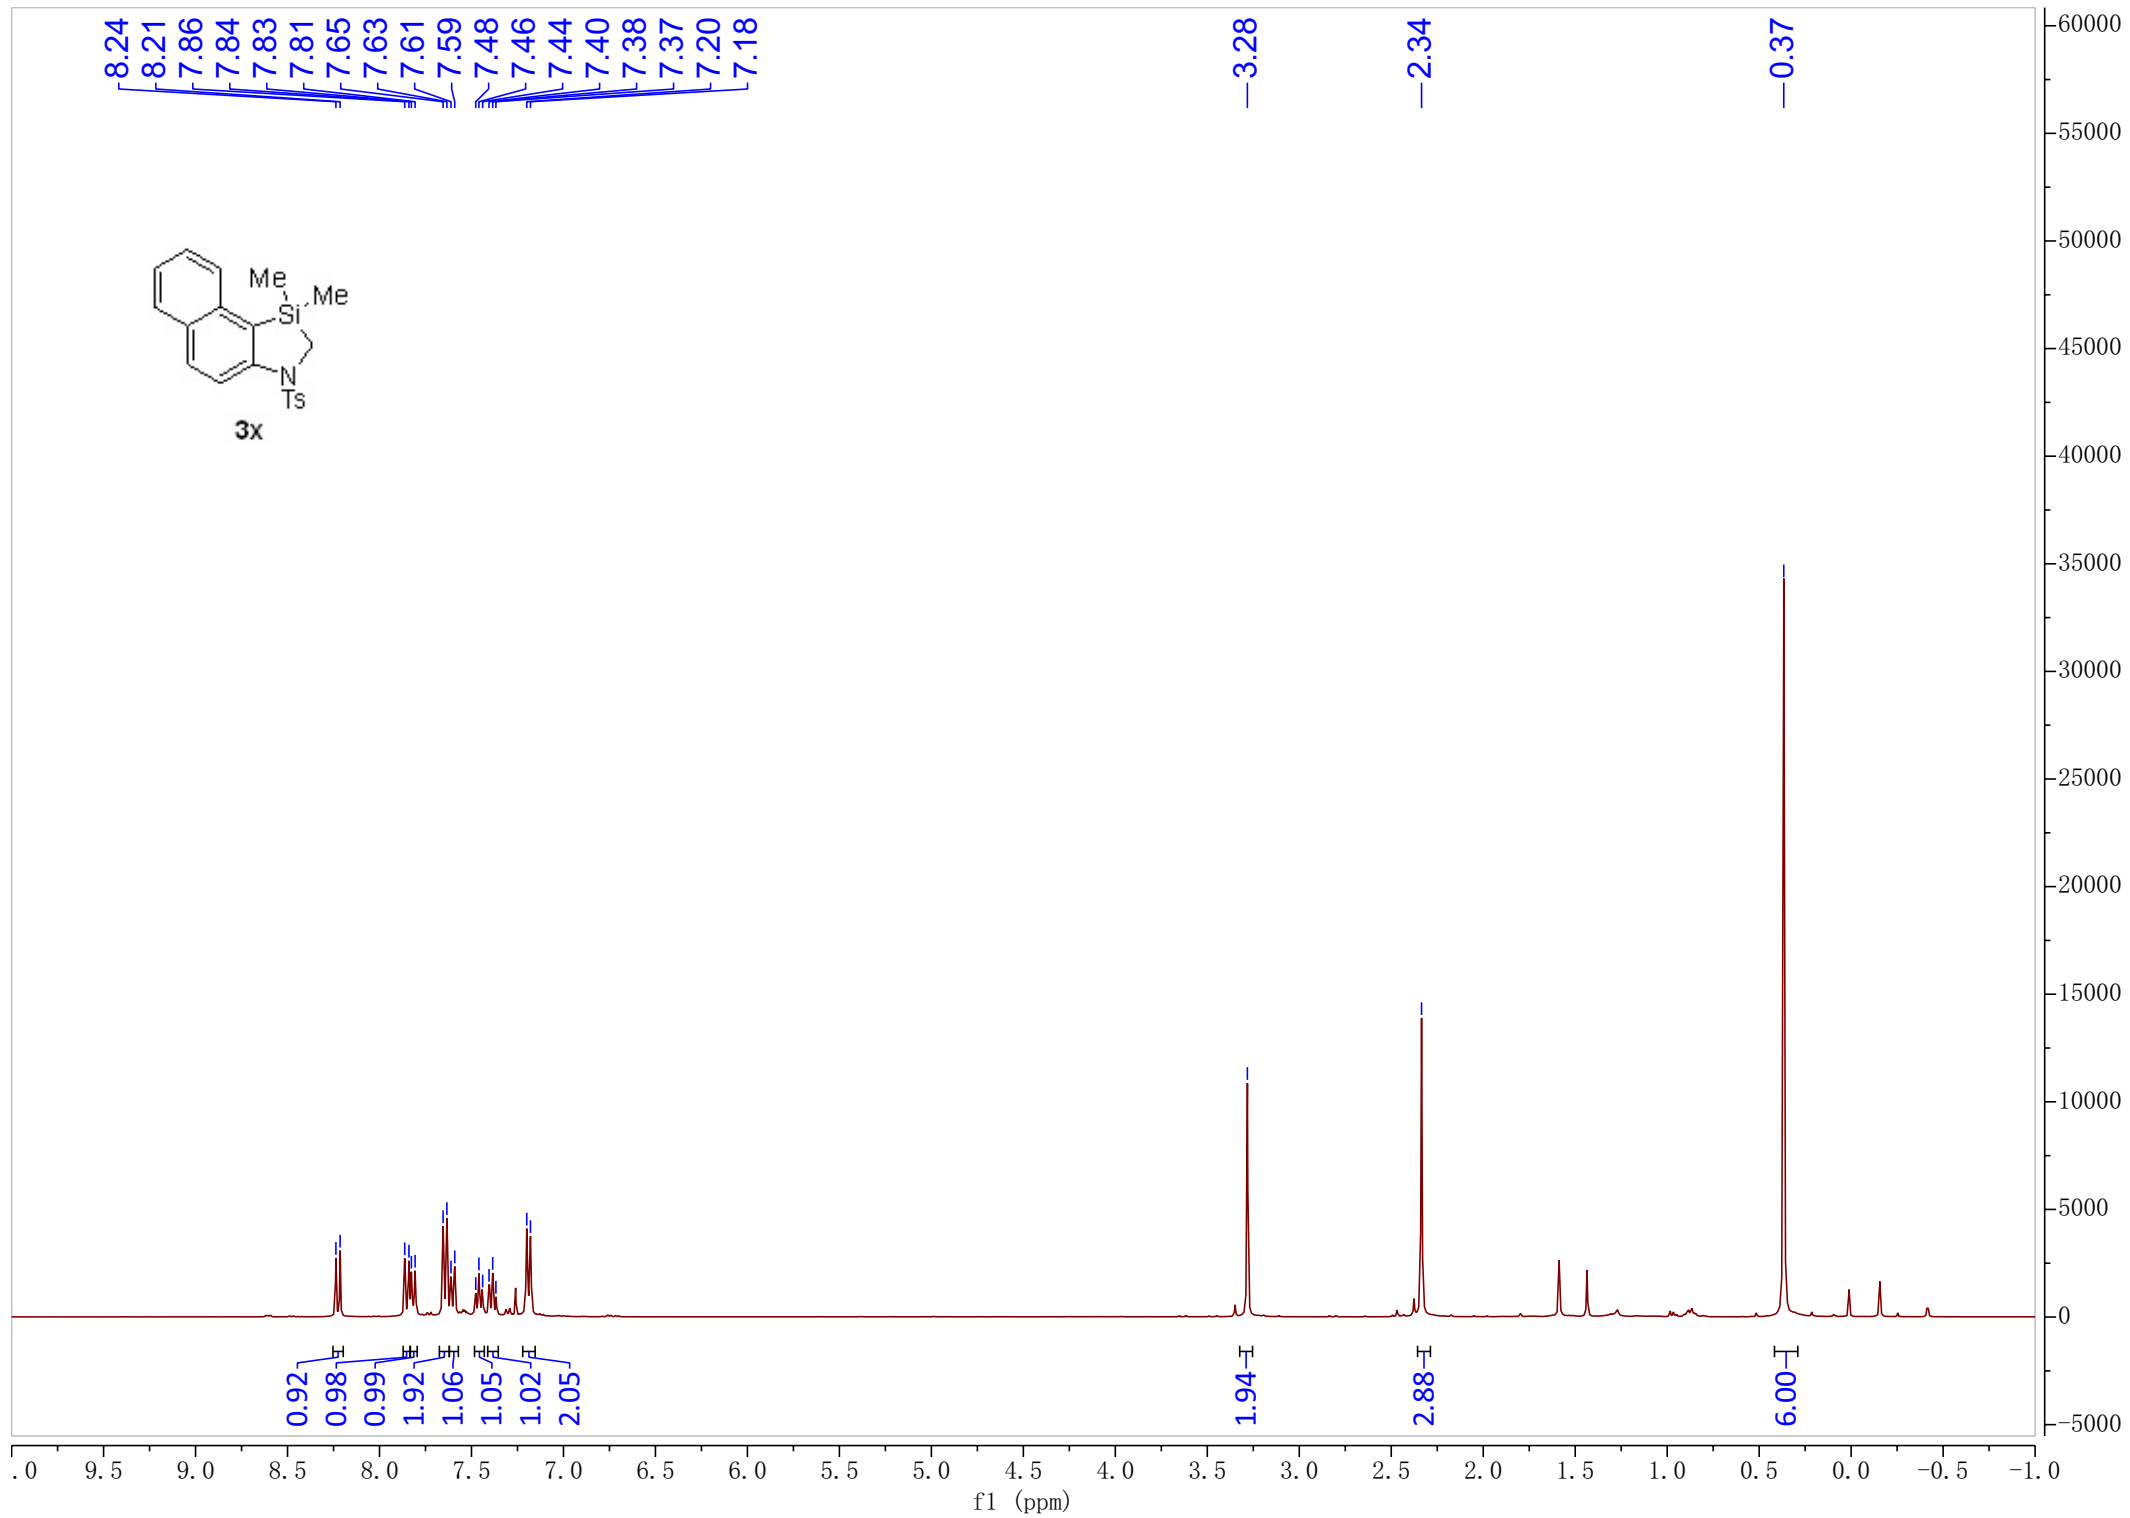

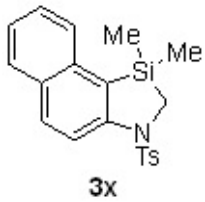

149.85  
143.69  
136.36  
134.94  
132.08  
130.10  
129.54  
128.50  
127.08  
126.96  
124.55  
122.45  
118.02

—38.90

—21.43

—-1.69

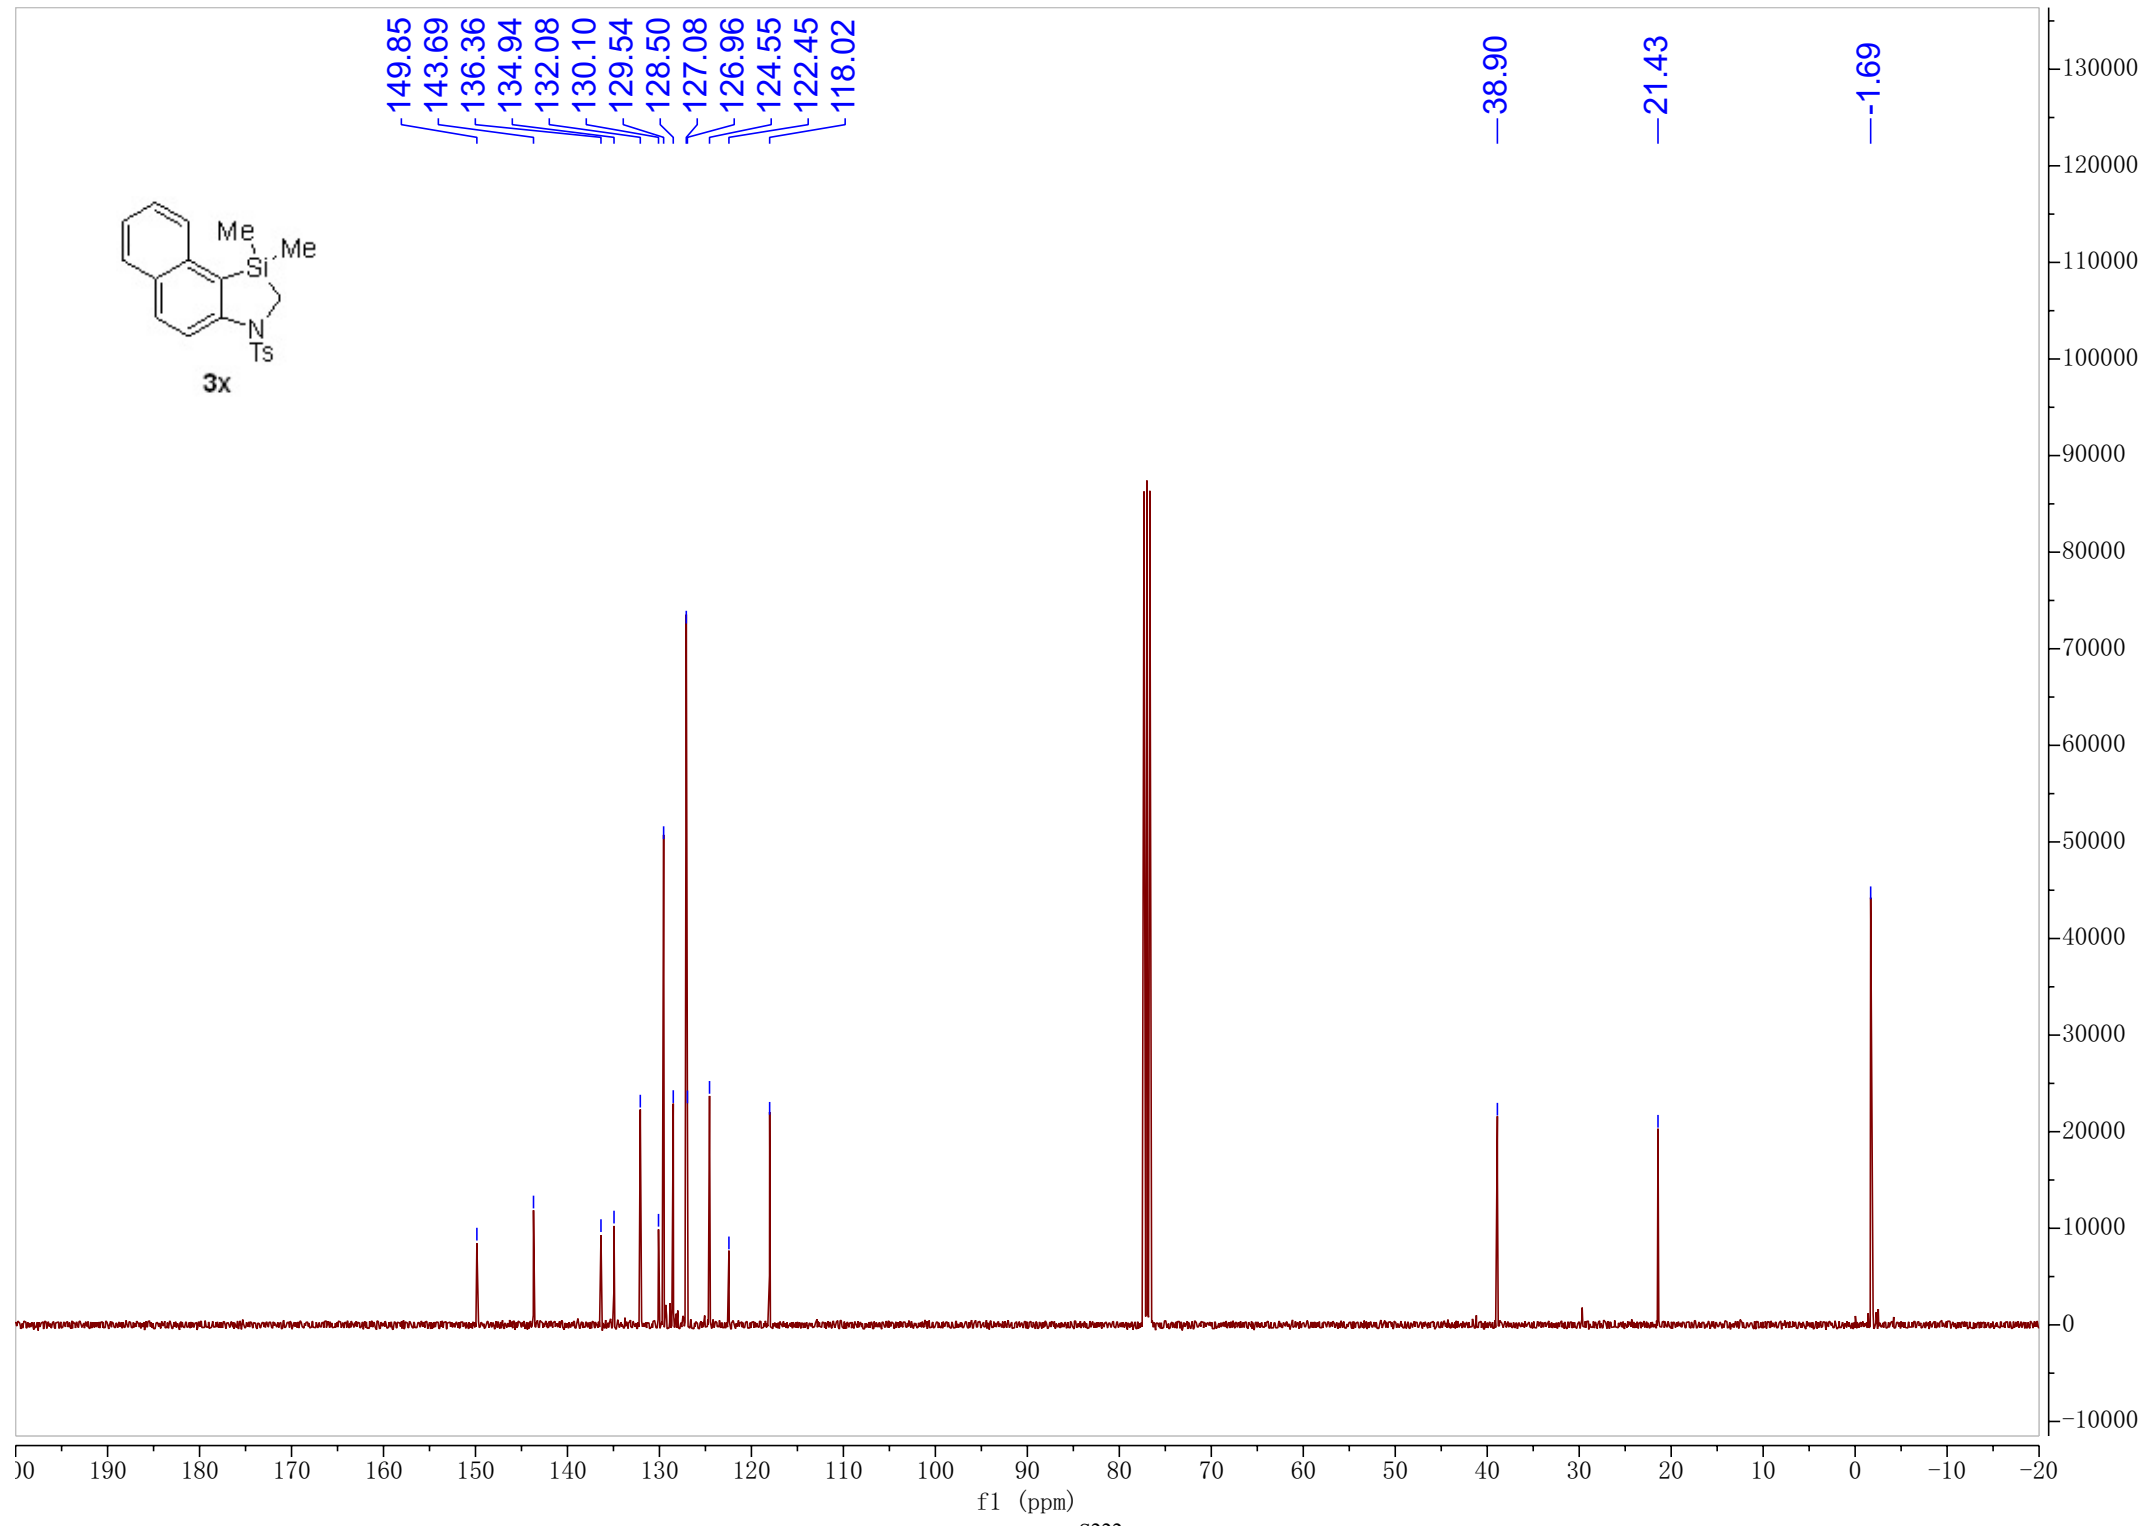

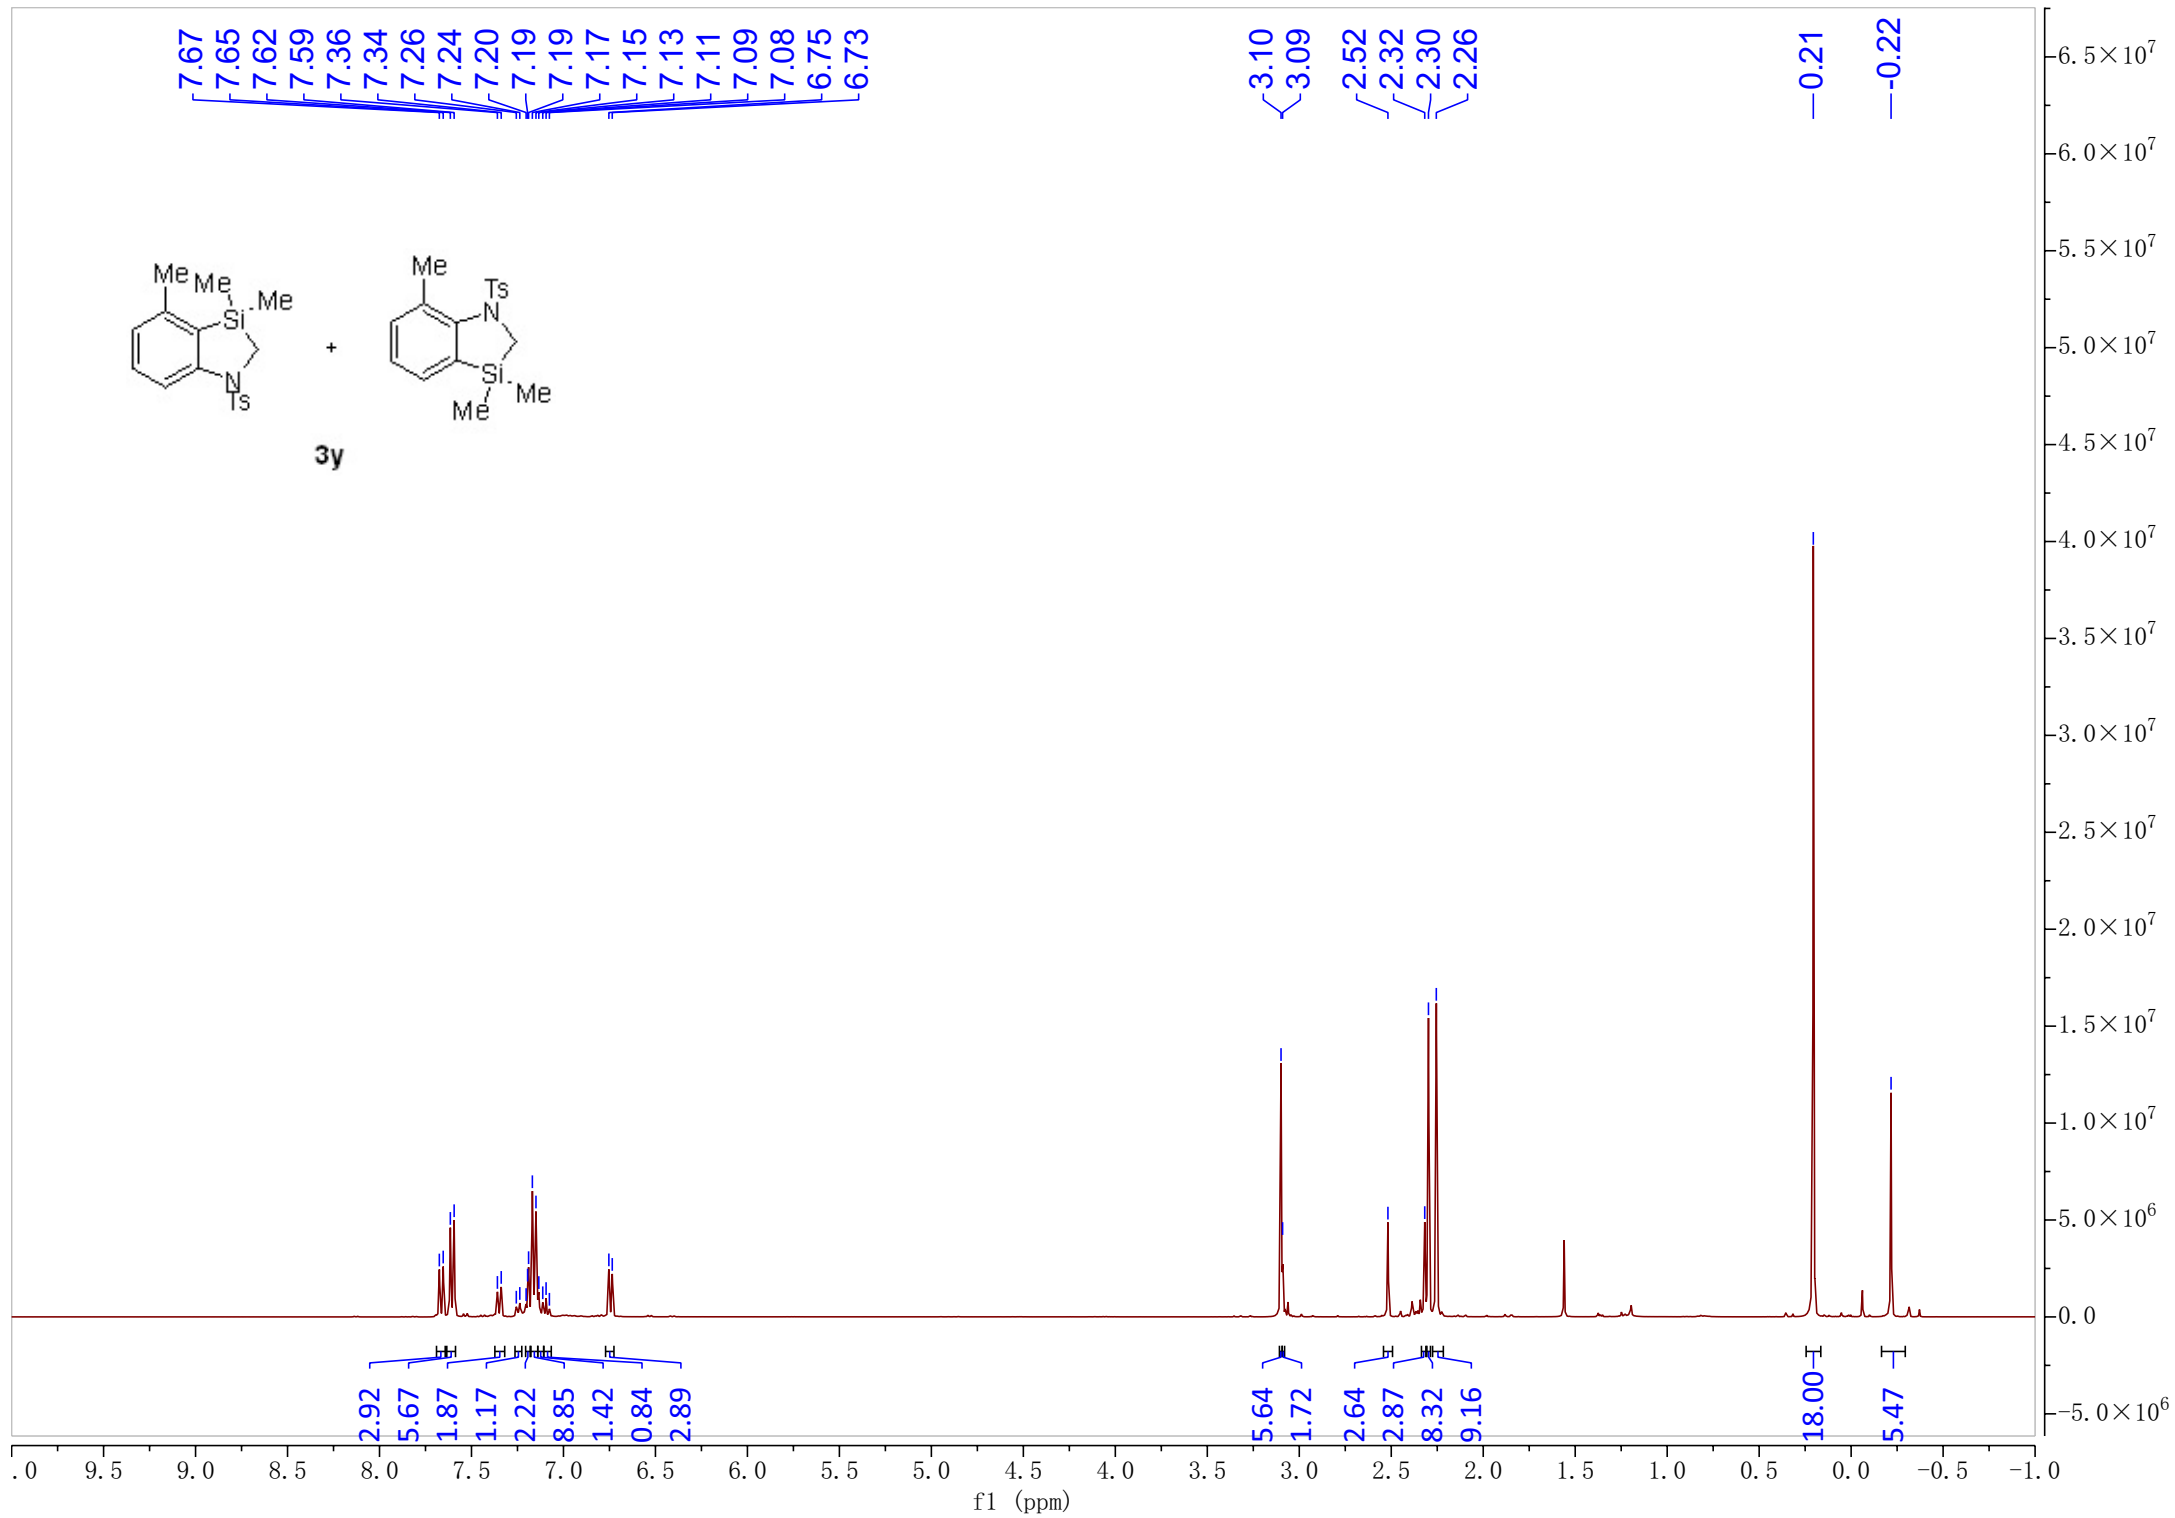

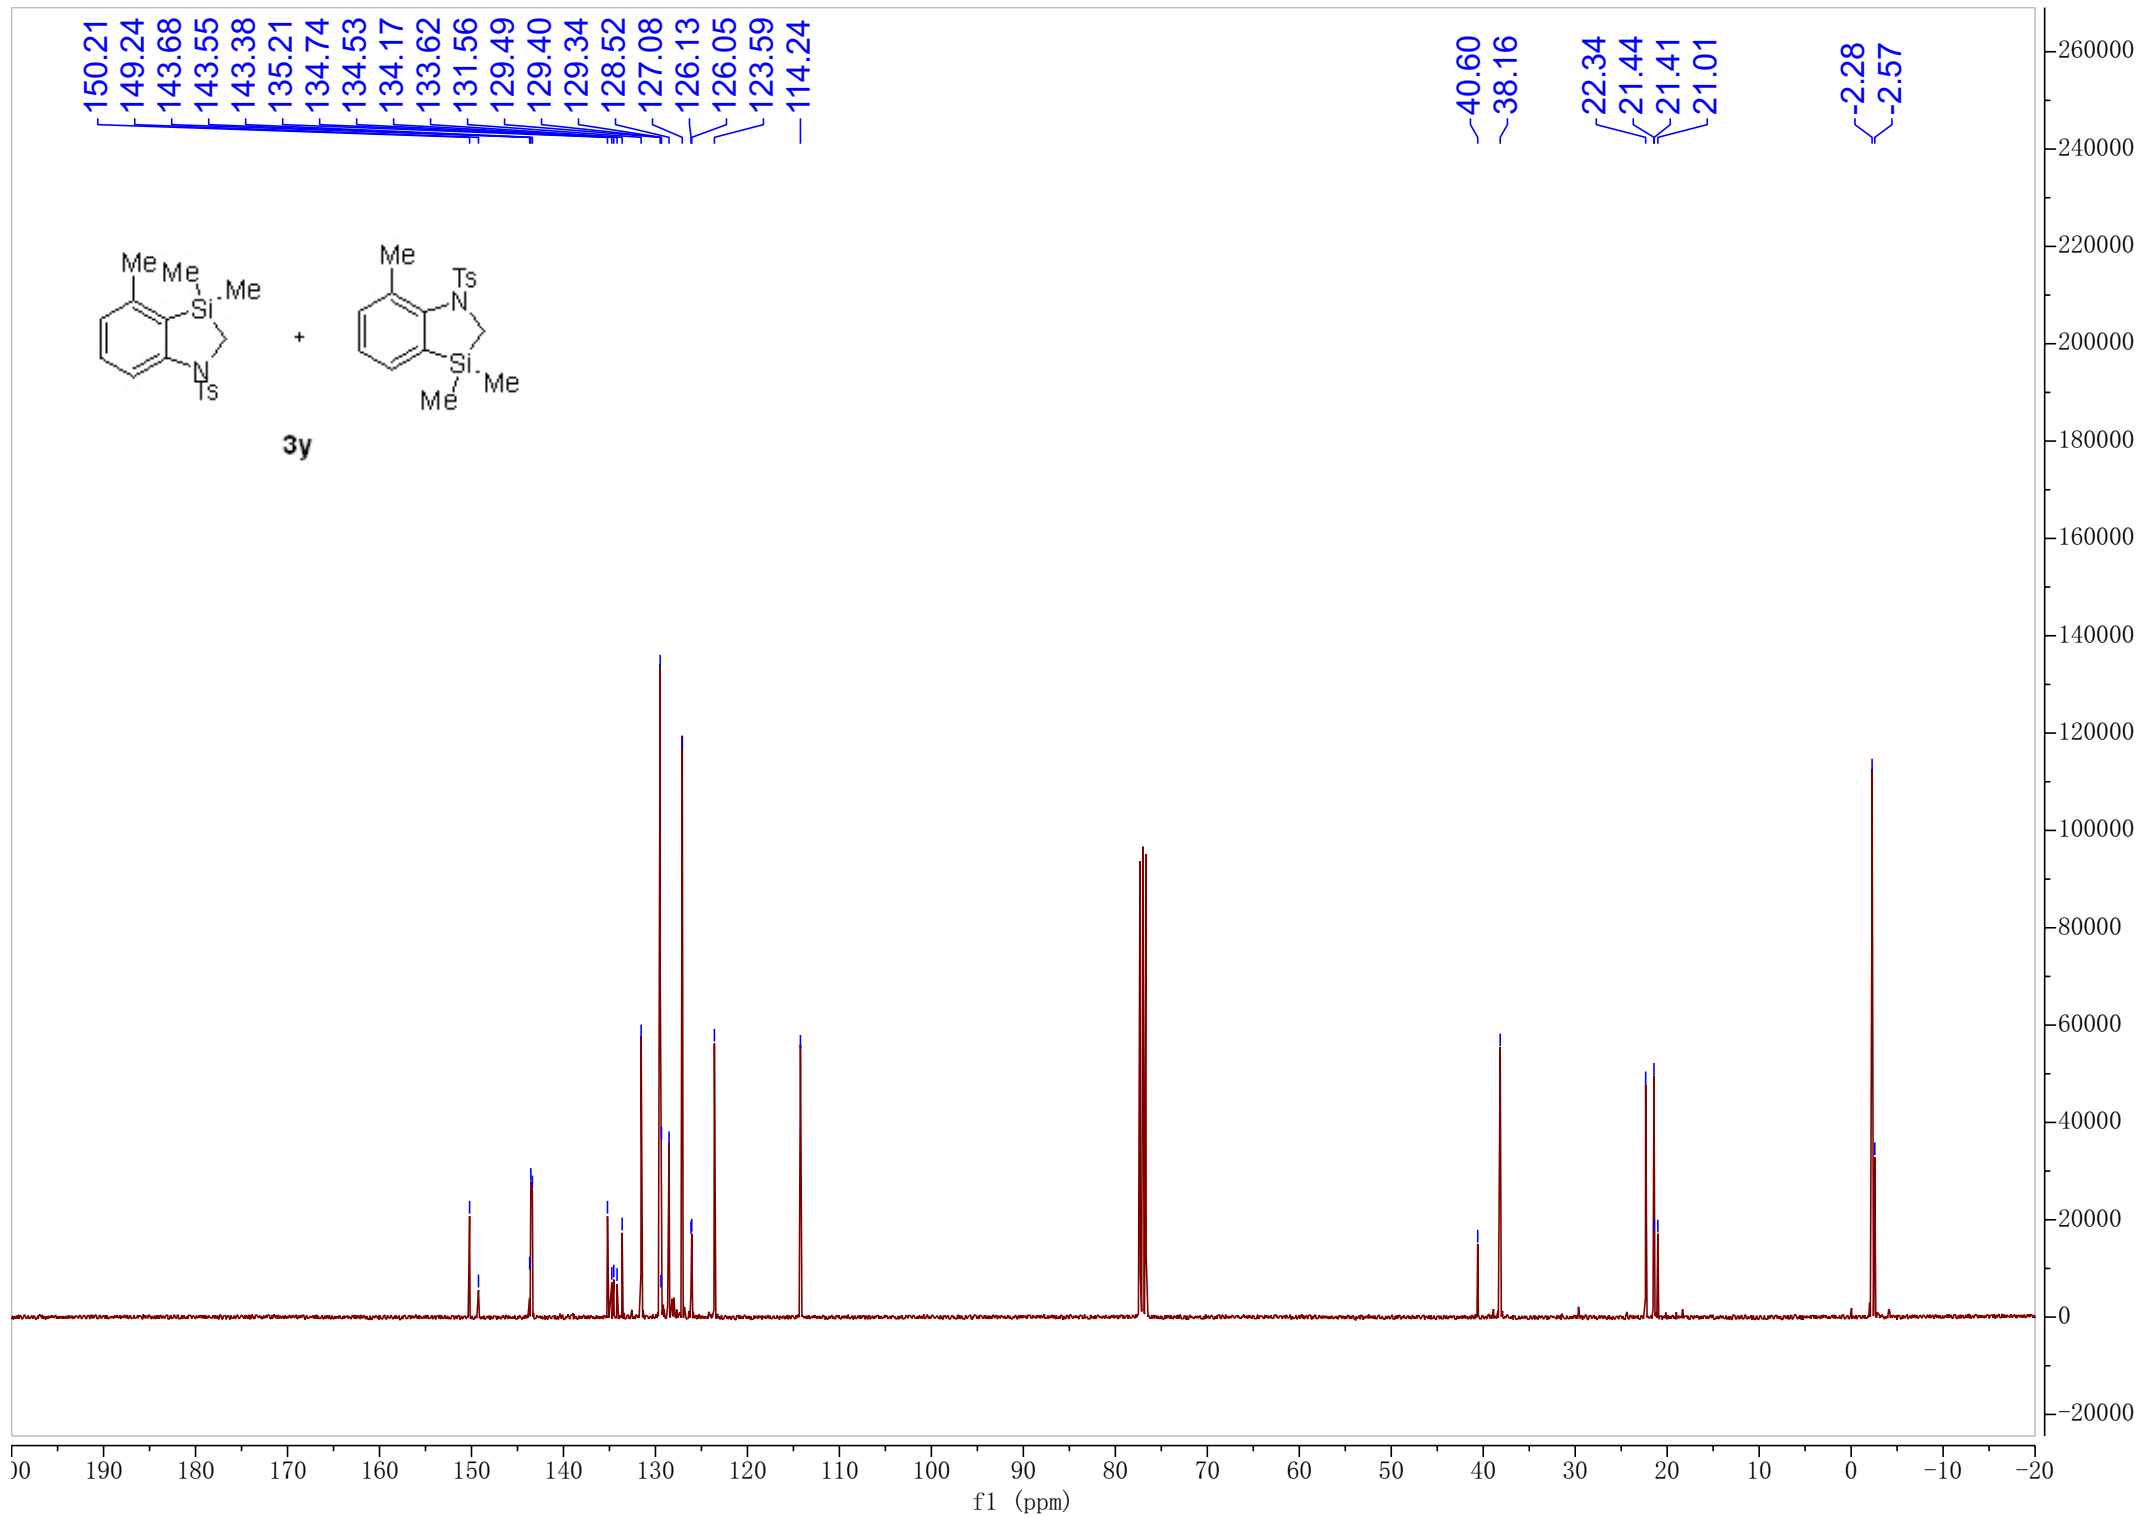



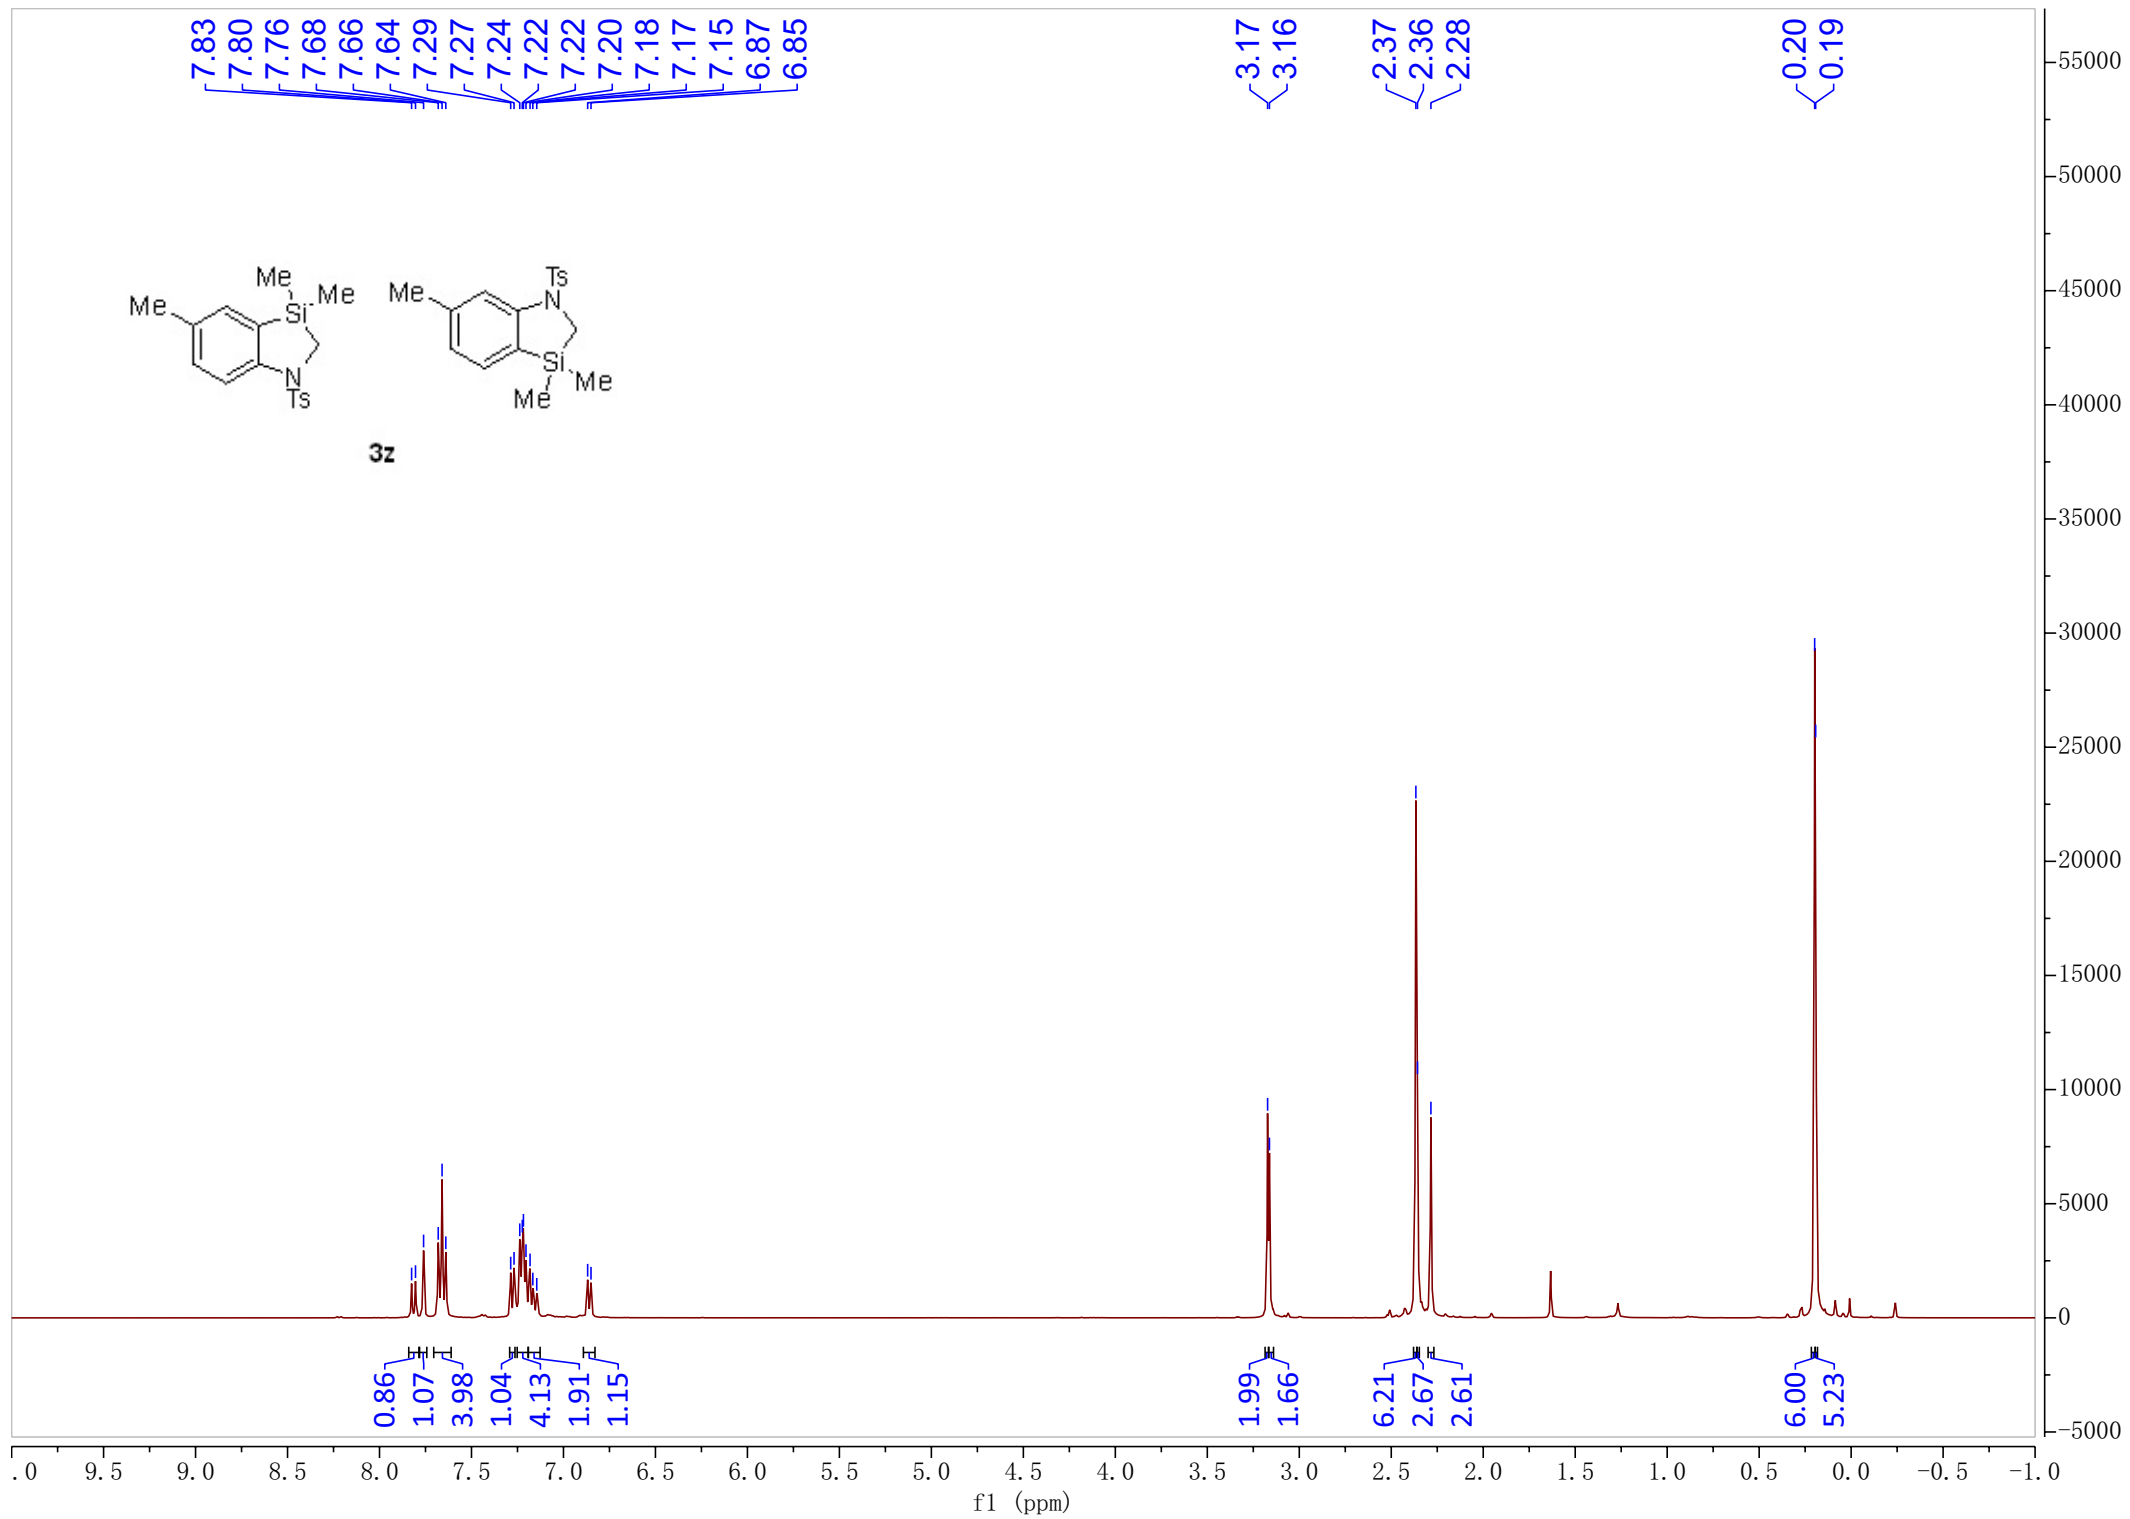



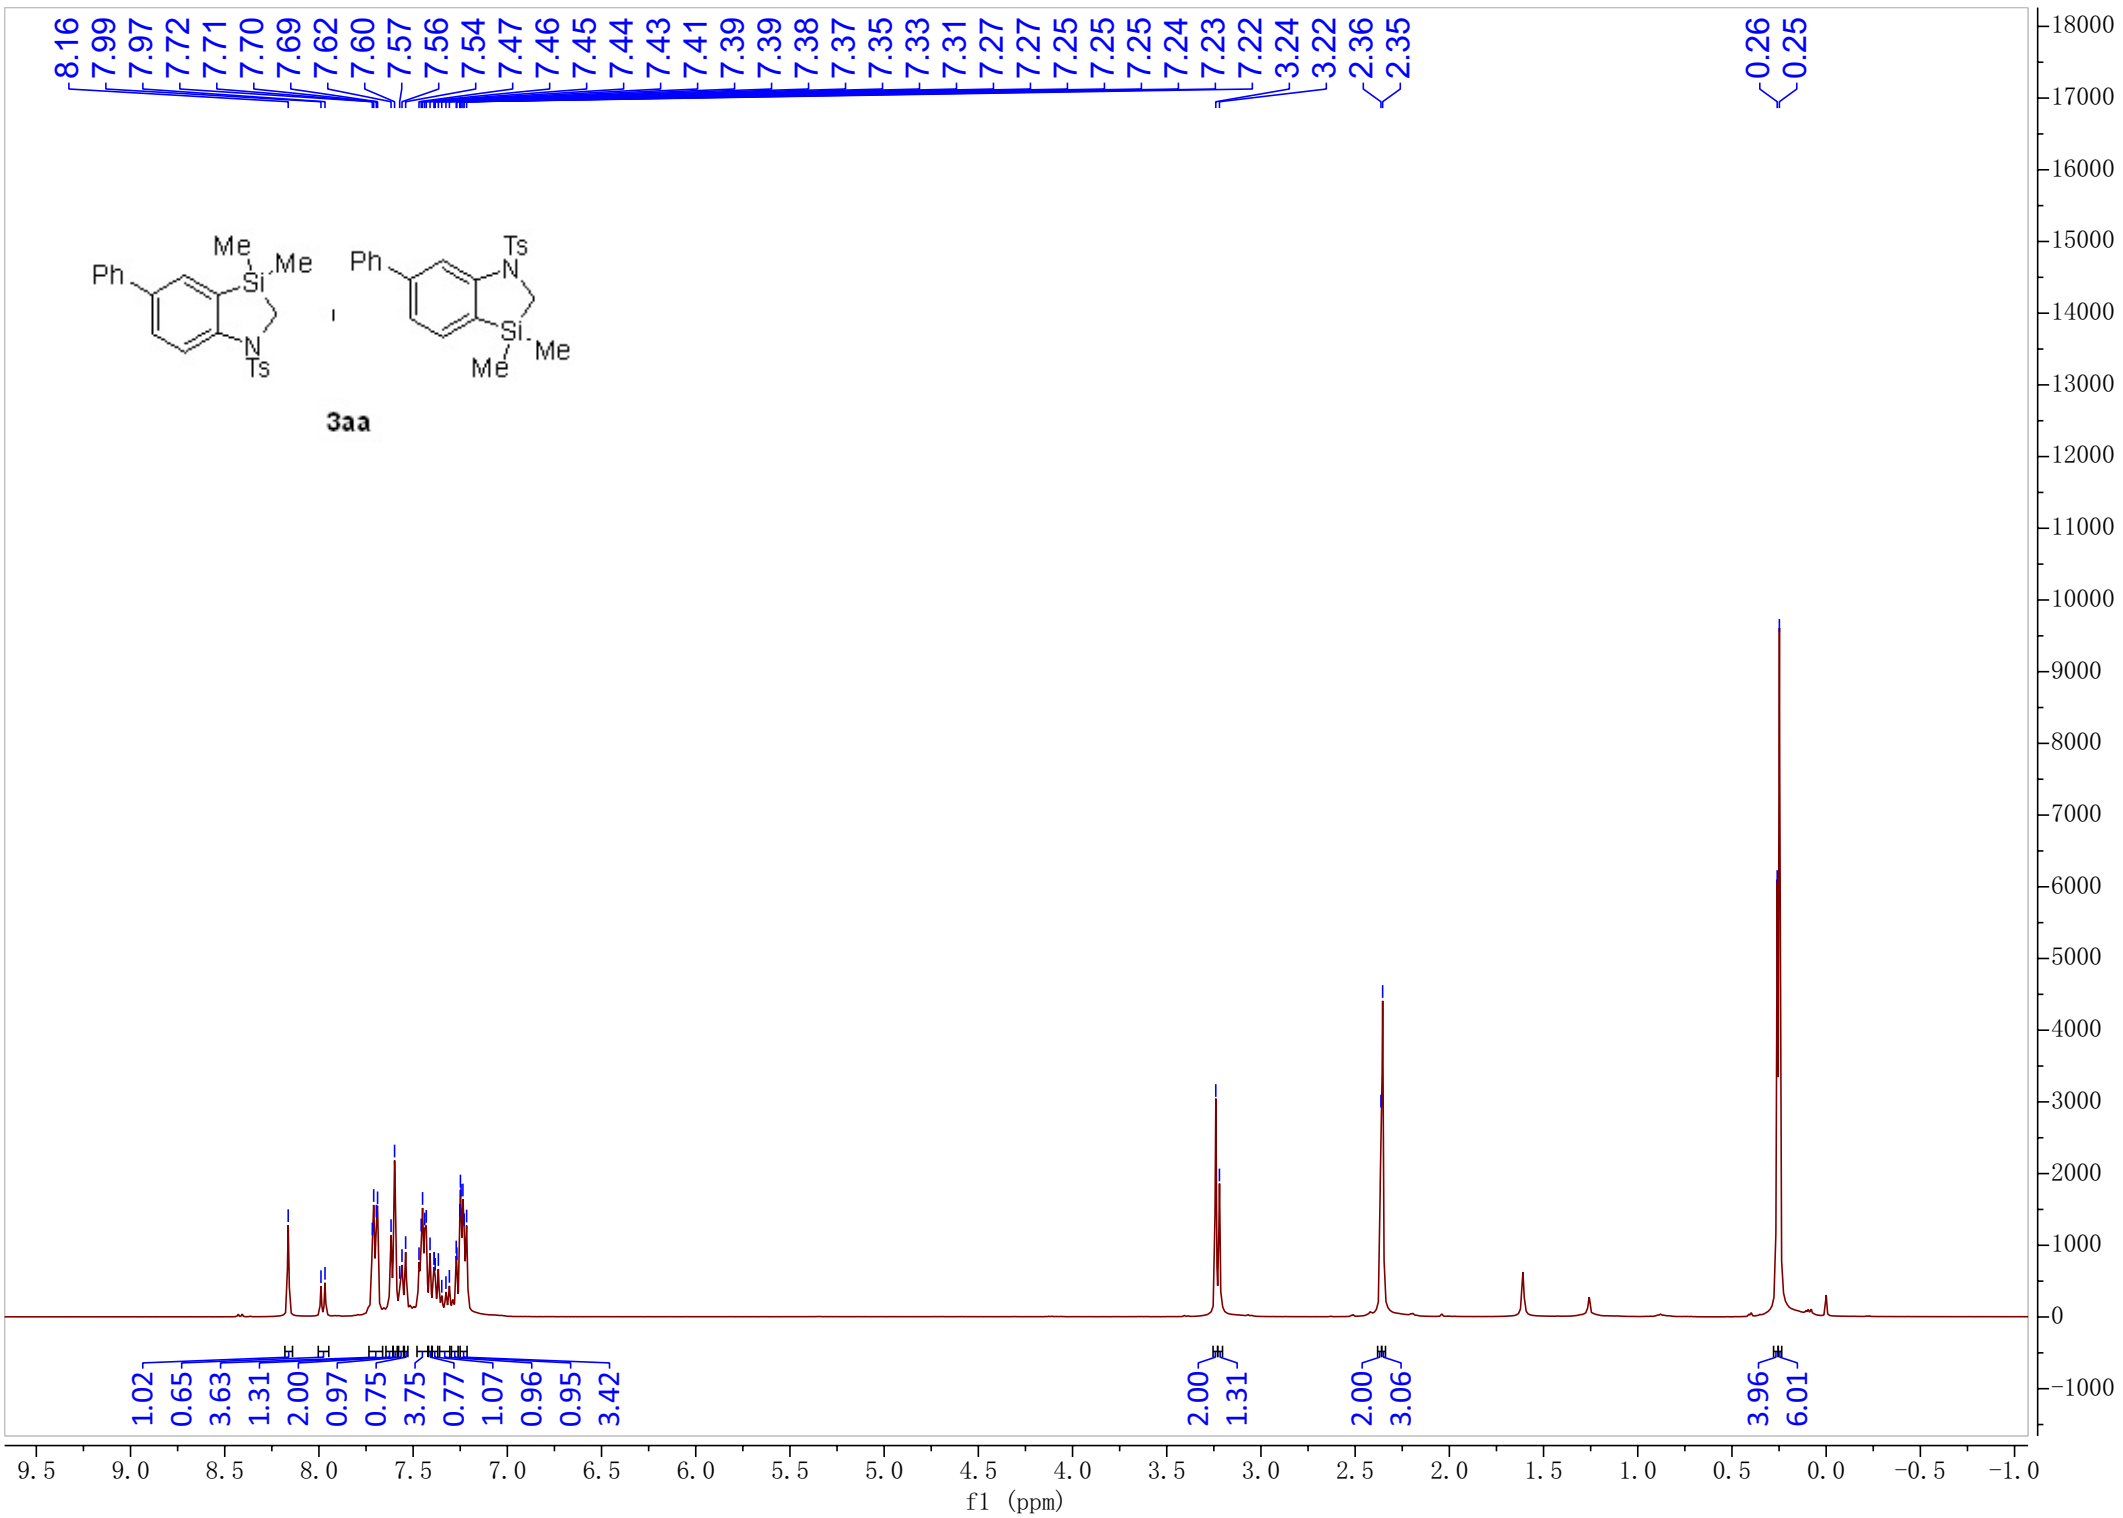

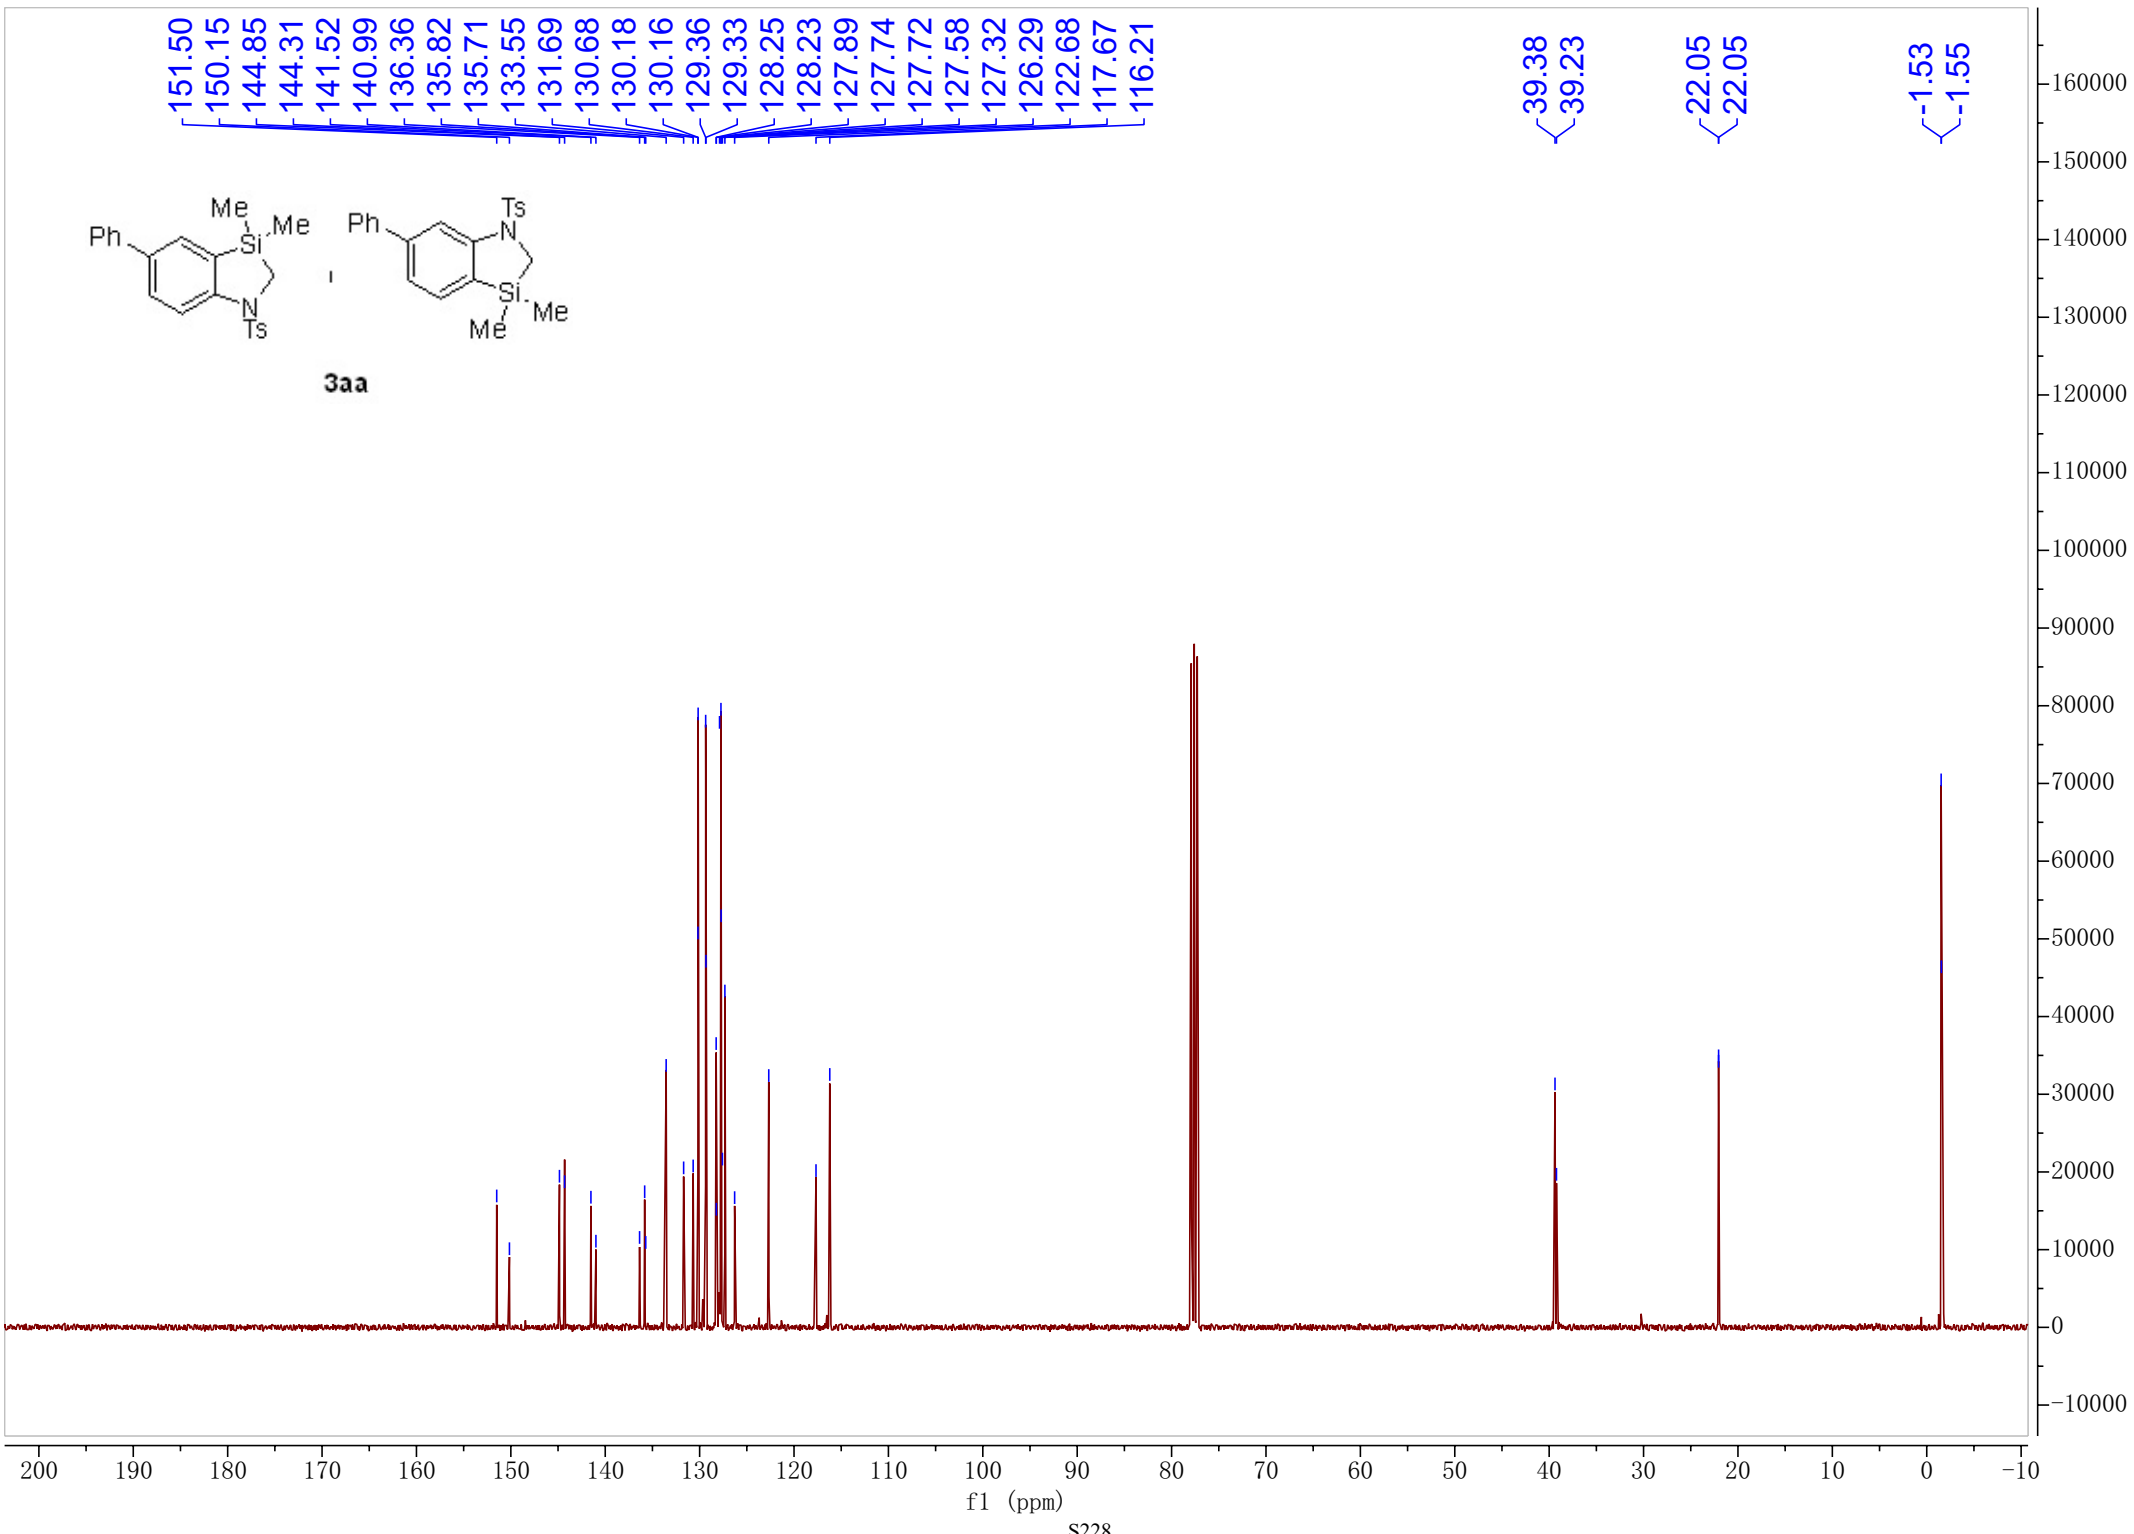

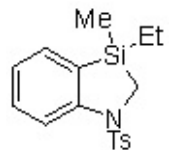

**3ab**

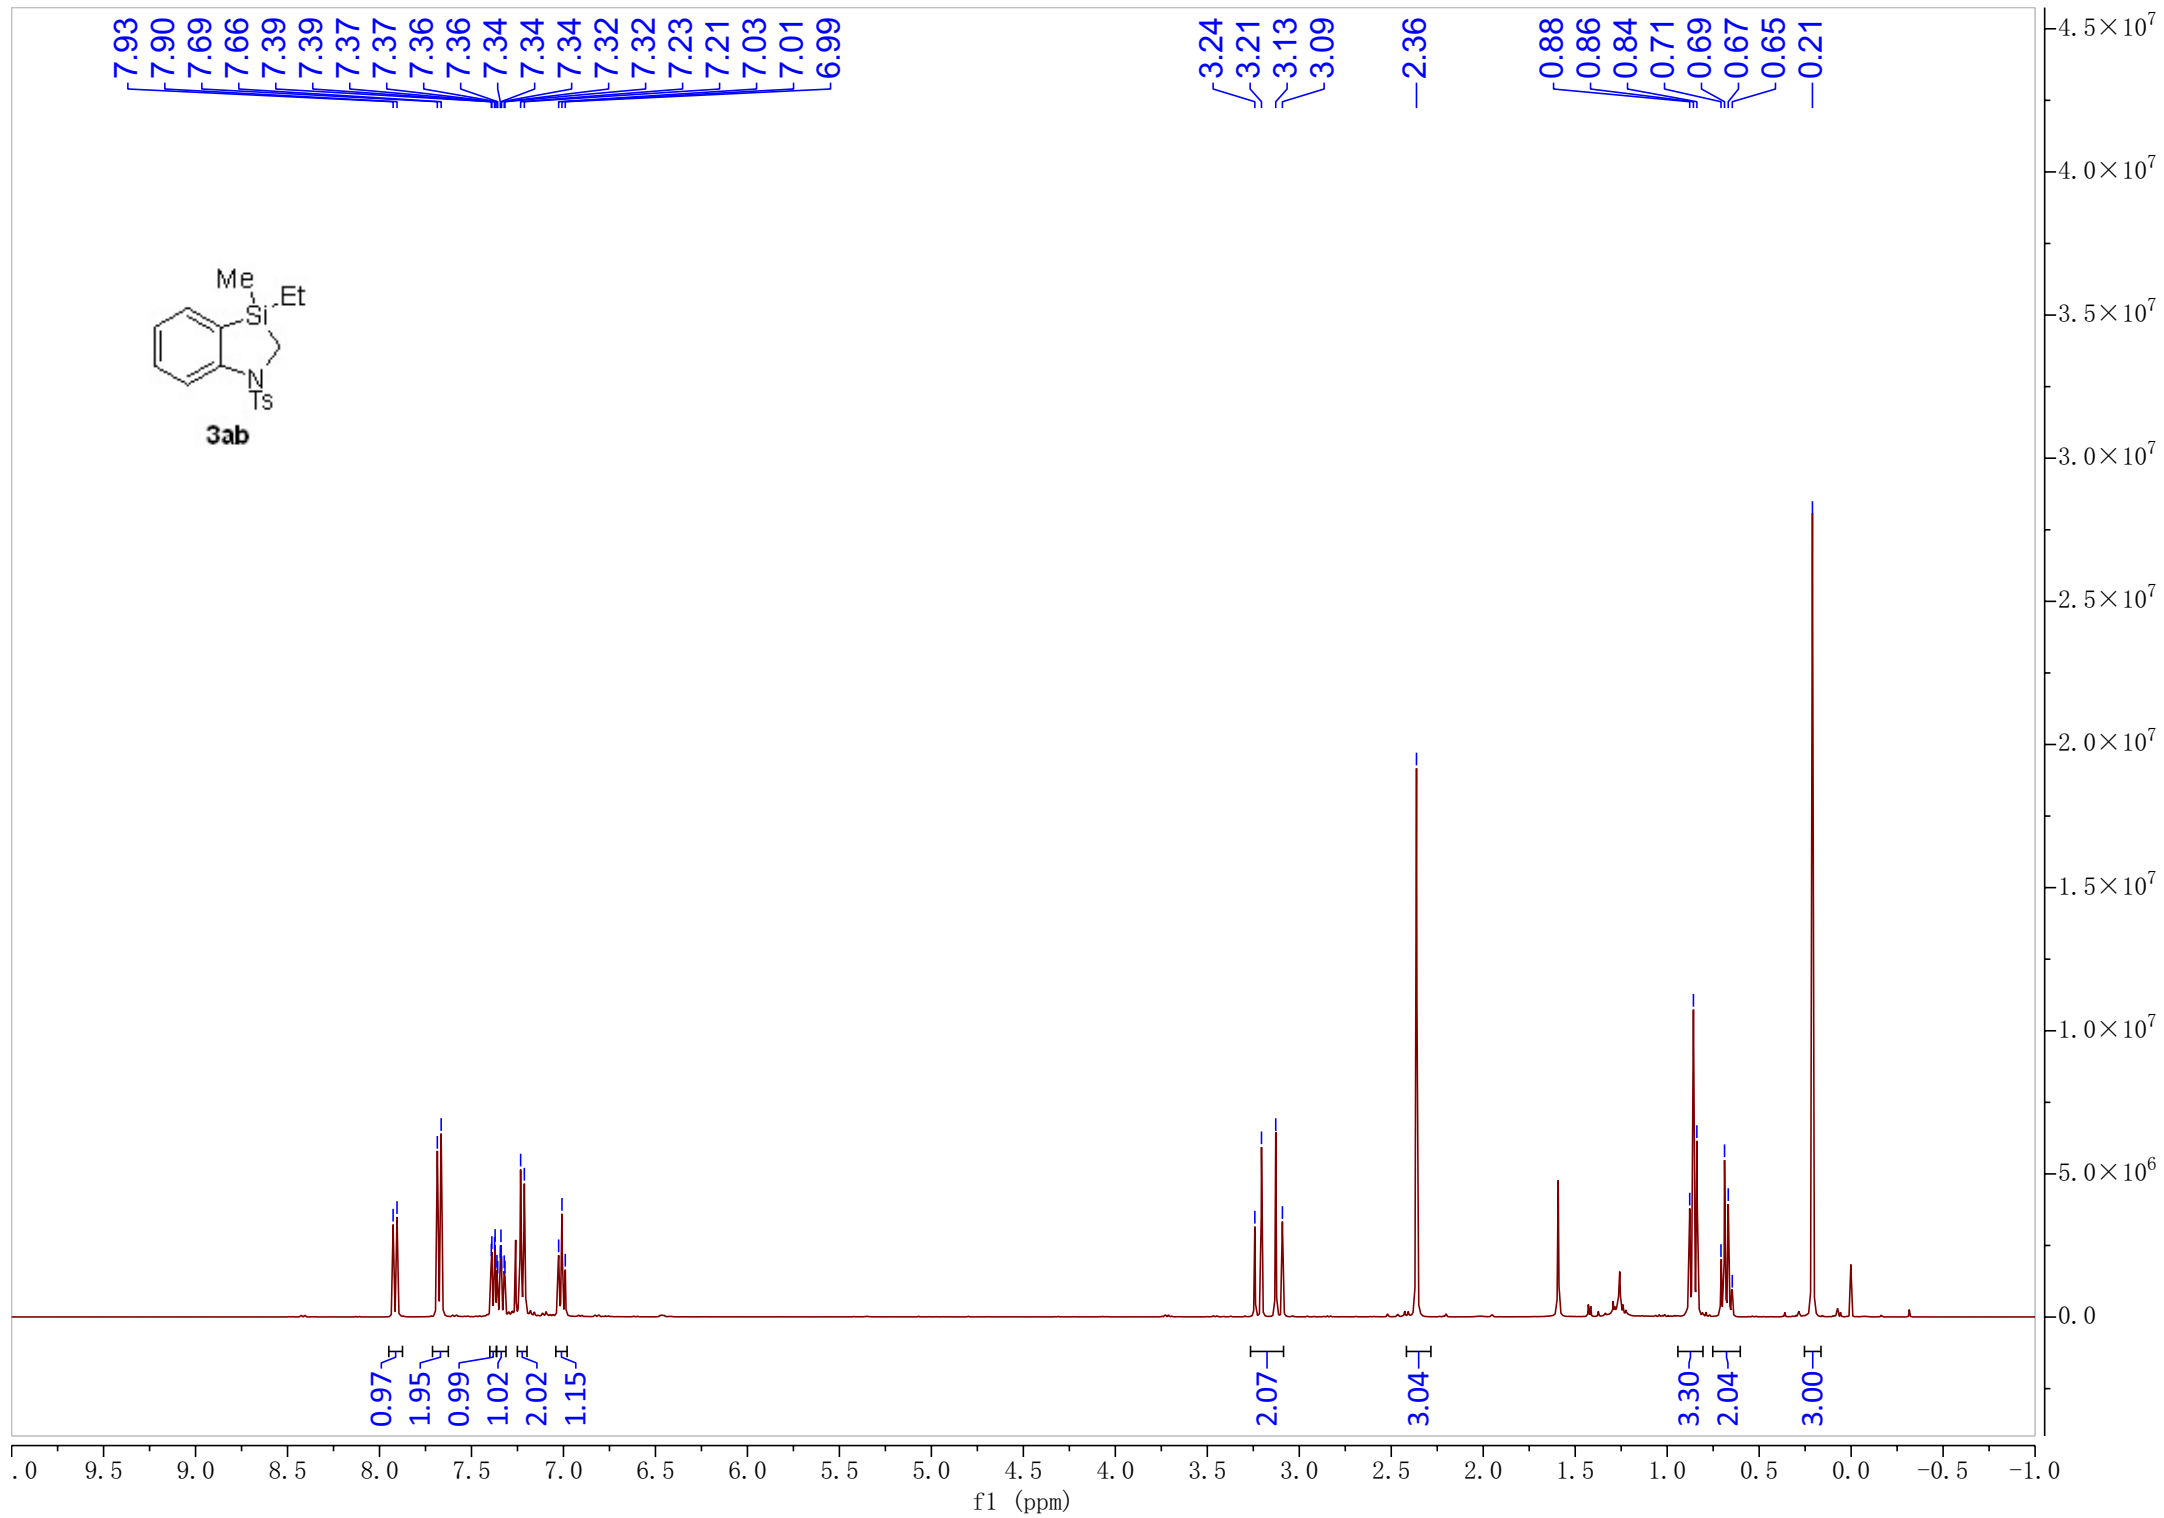

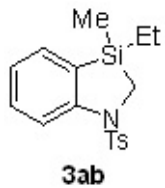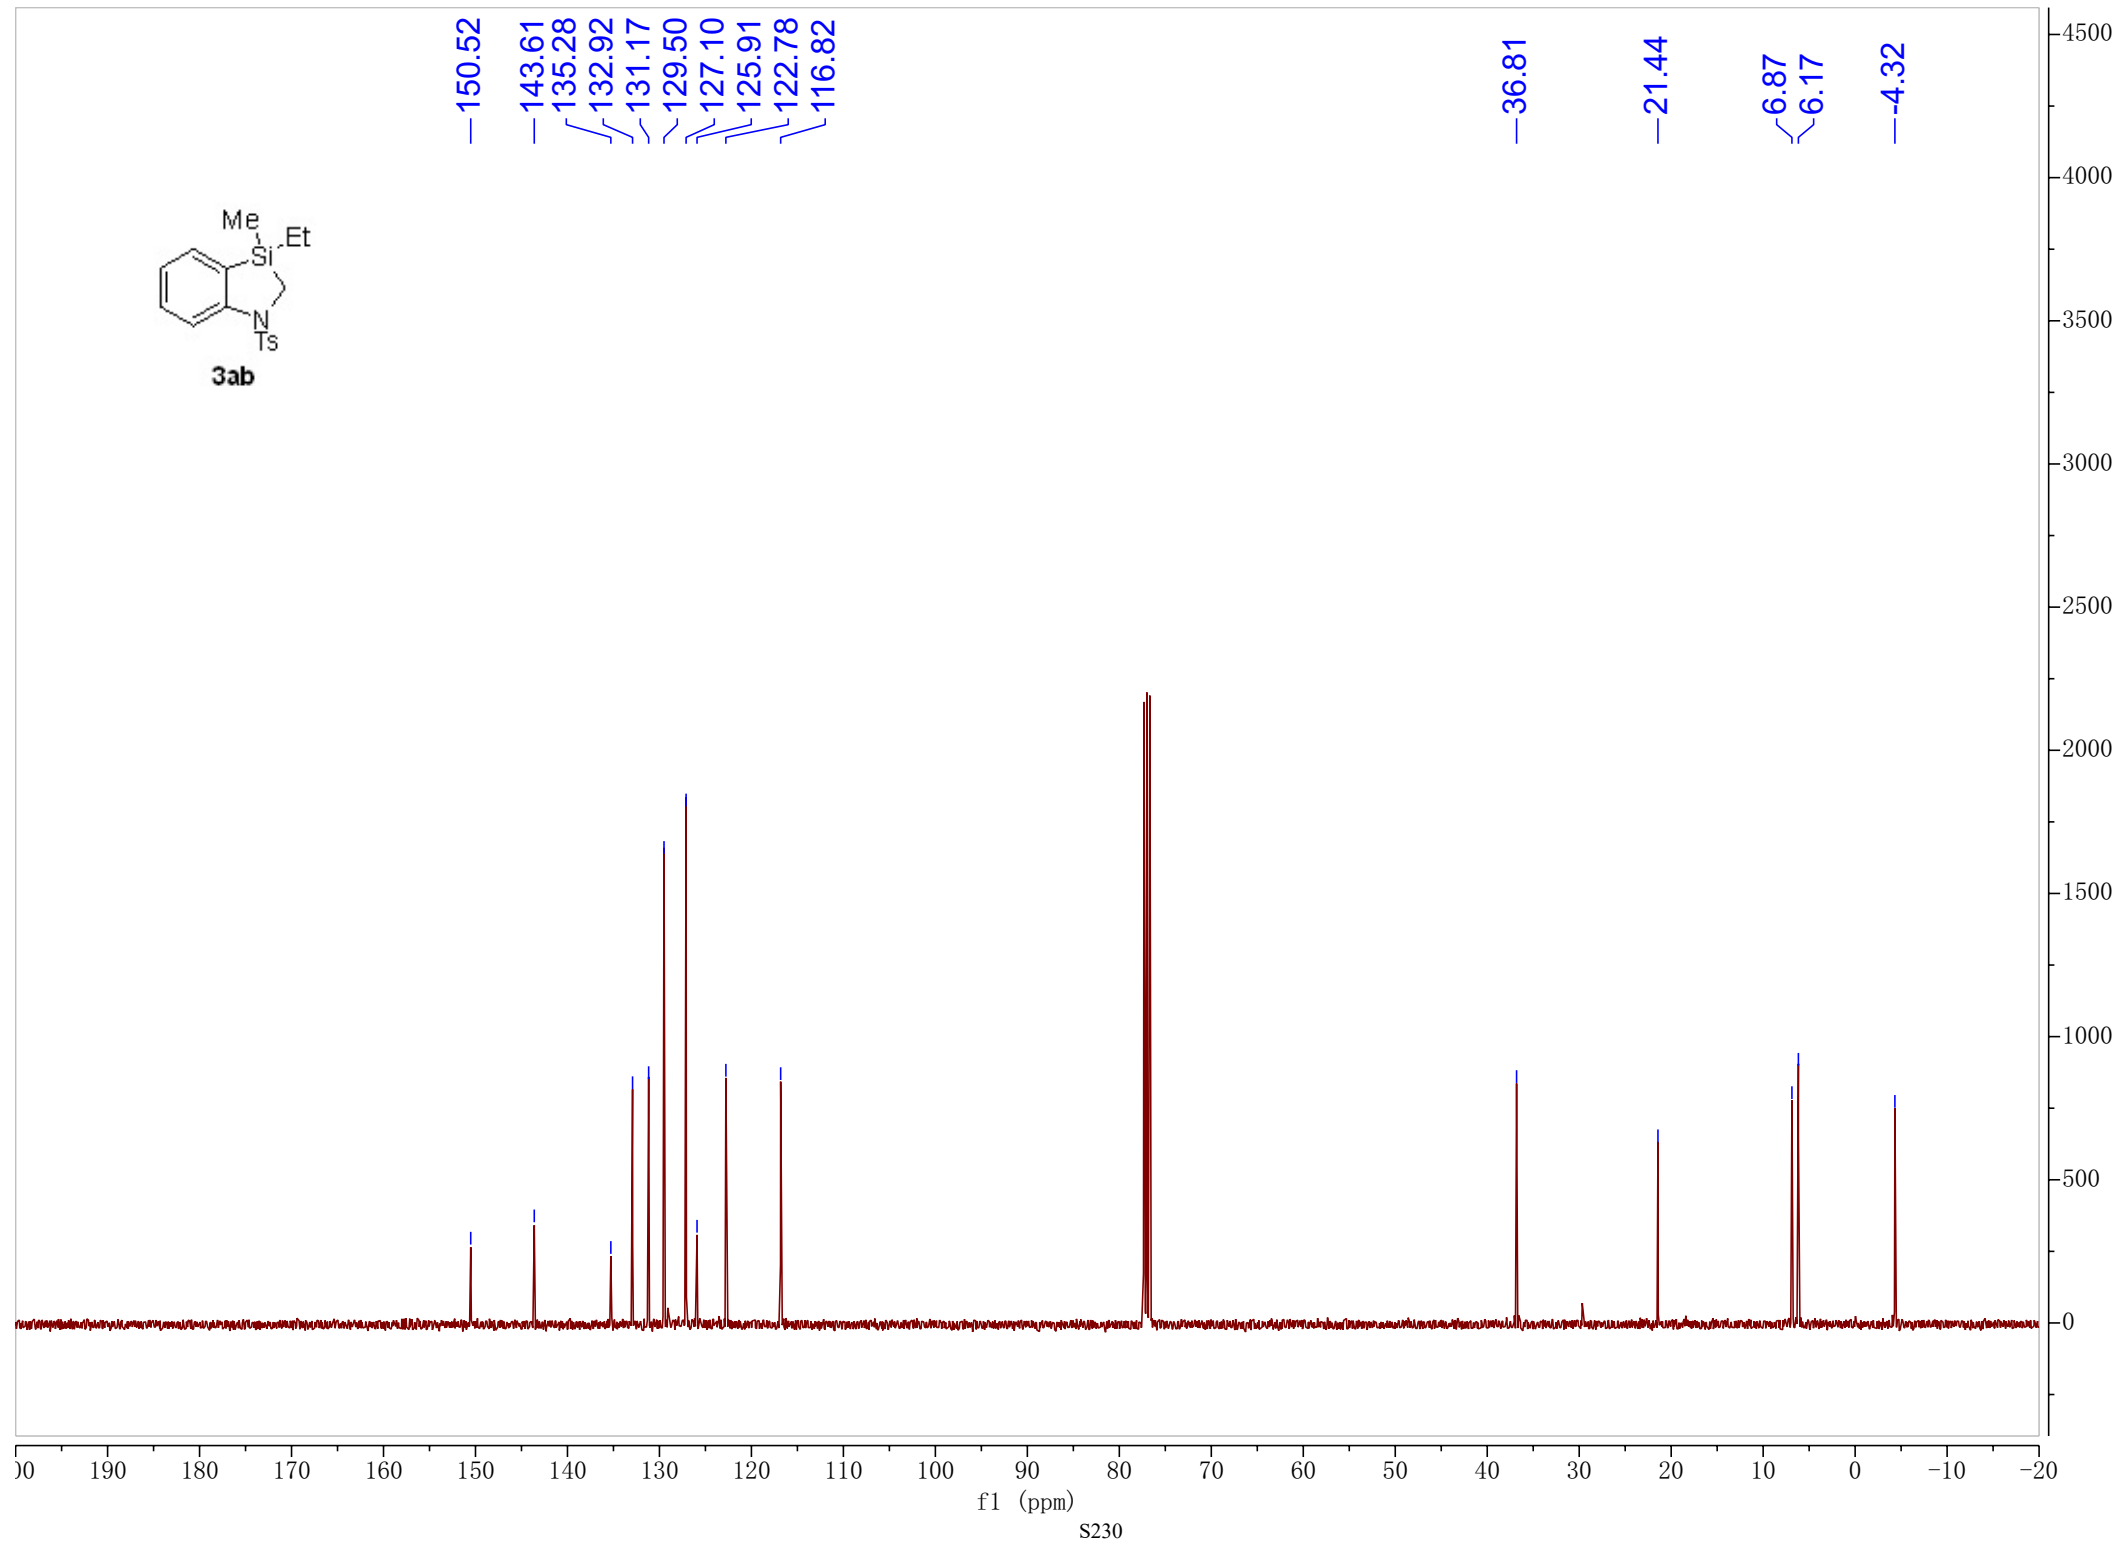

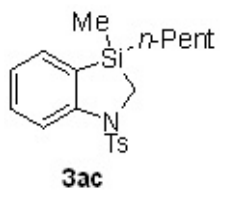

7.94  
7.91  
7.67  
7.65  
7.38  
7.36  
7.34  
7.32  
7.23  
7.21  
7.03  
7.01  
6.99

3.22  
3.18  
3.13  
3.09  
2.36  
1.23  
1.20  
1.19  
1.18  
1.16  
0.84  
0.82  
0.81  
0.67  
0.65  
0.63  
-0.21

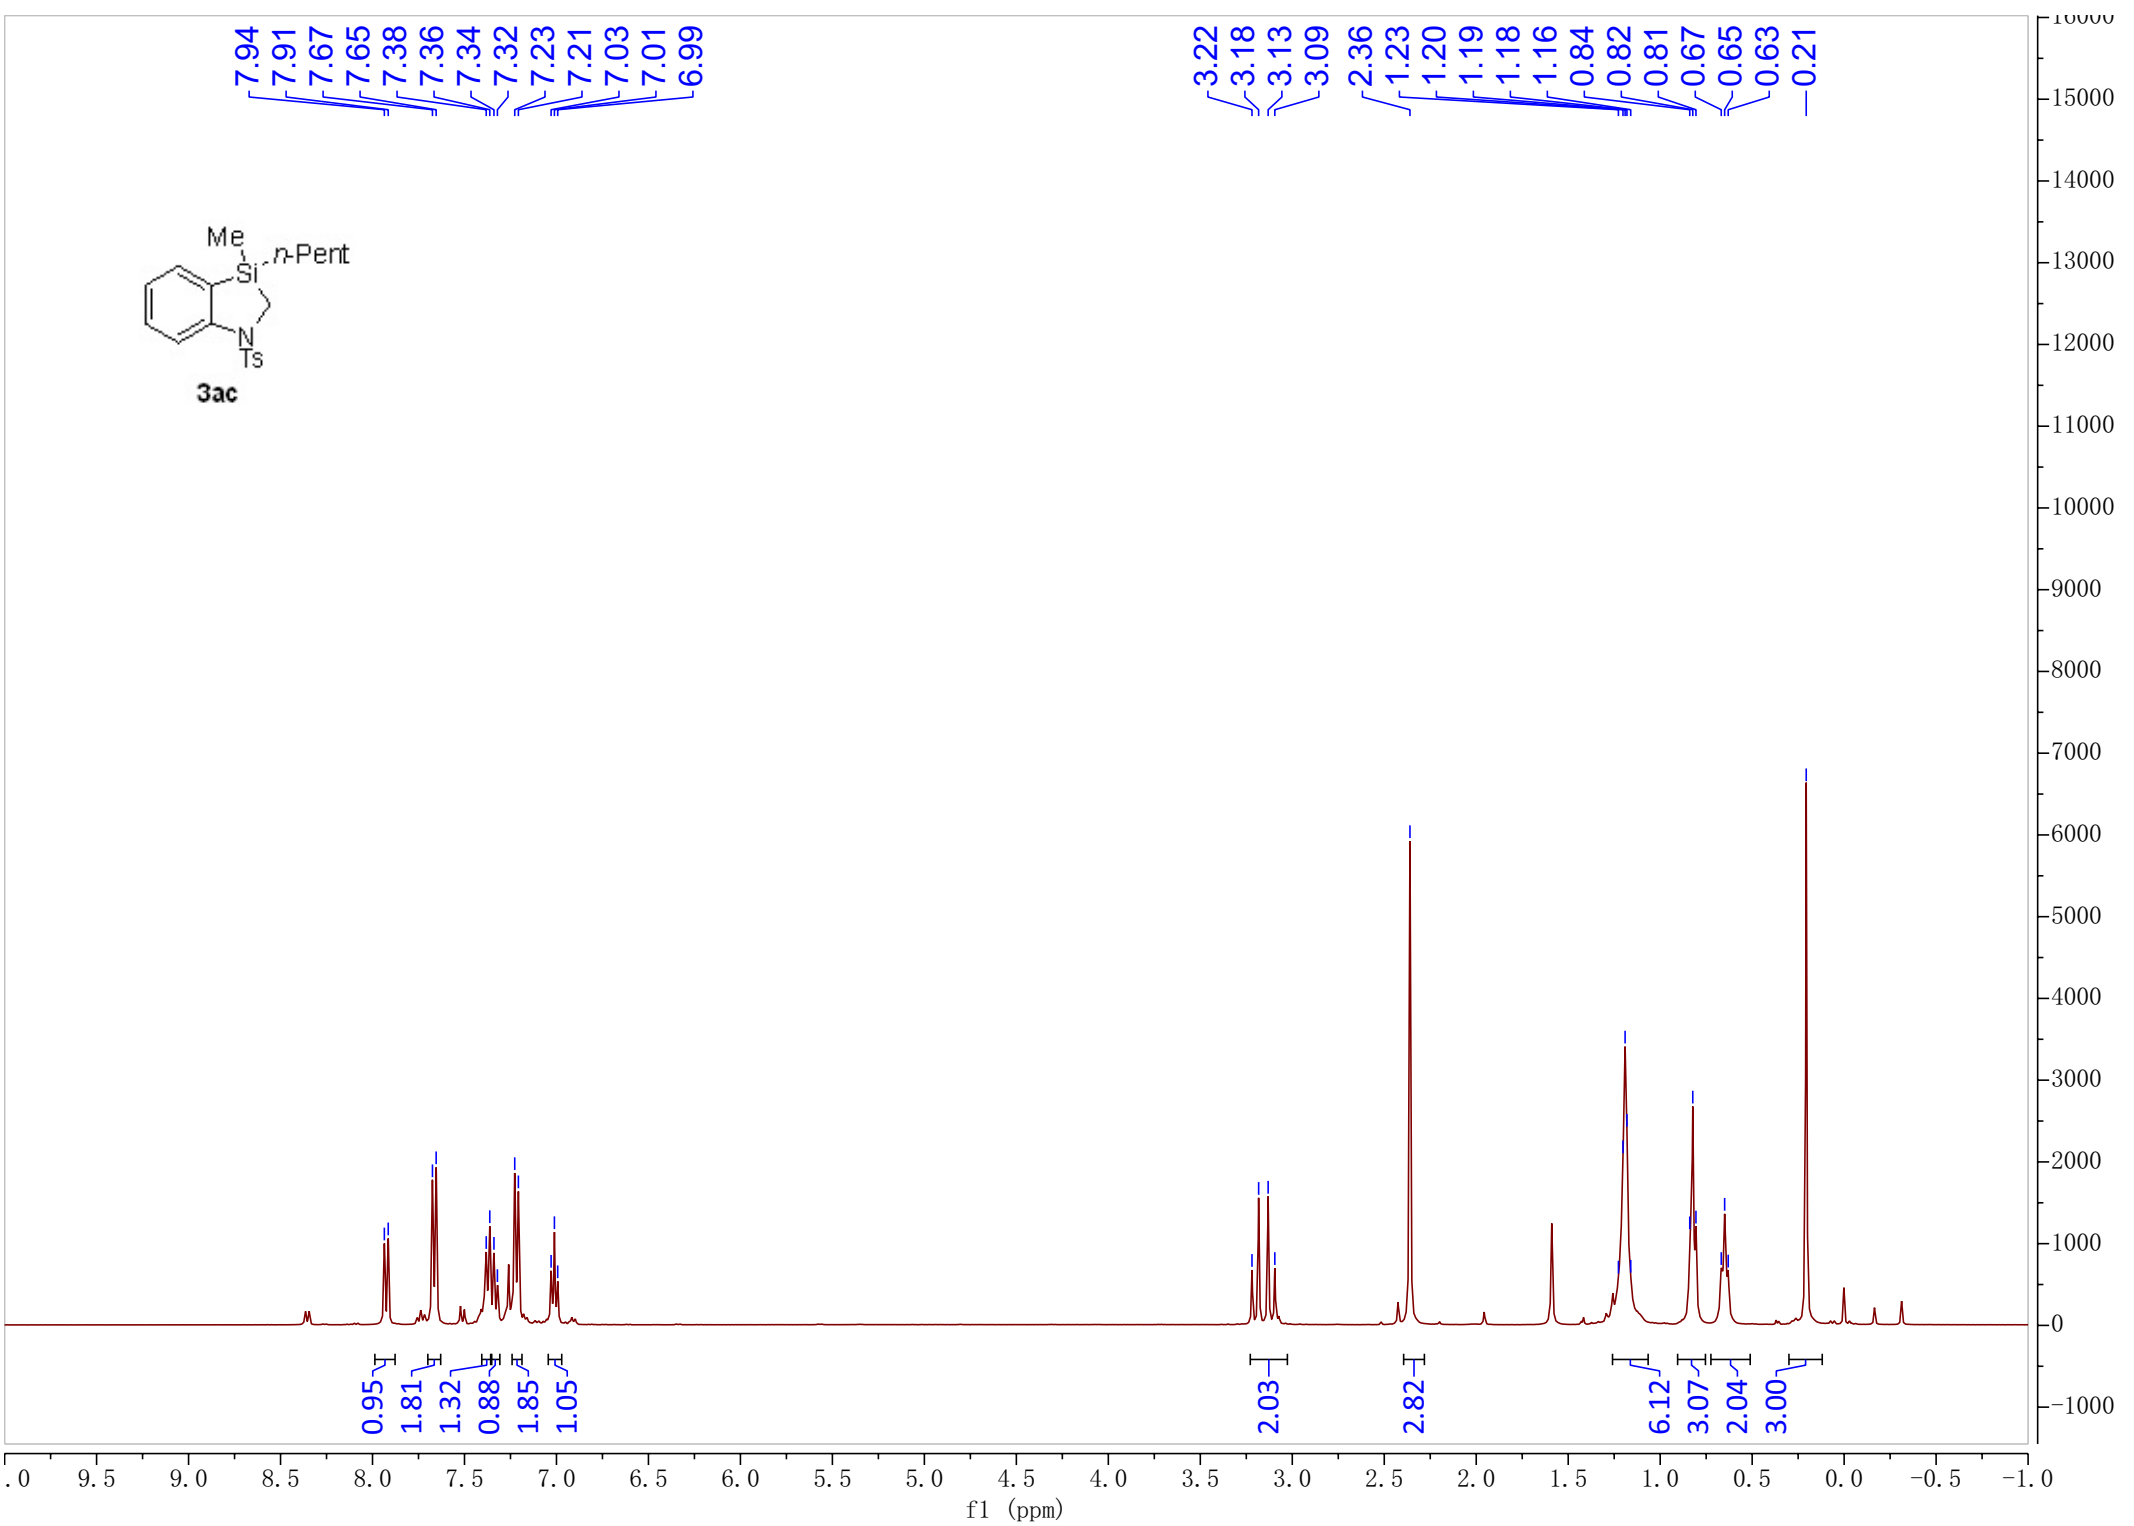

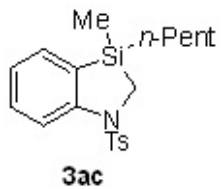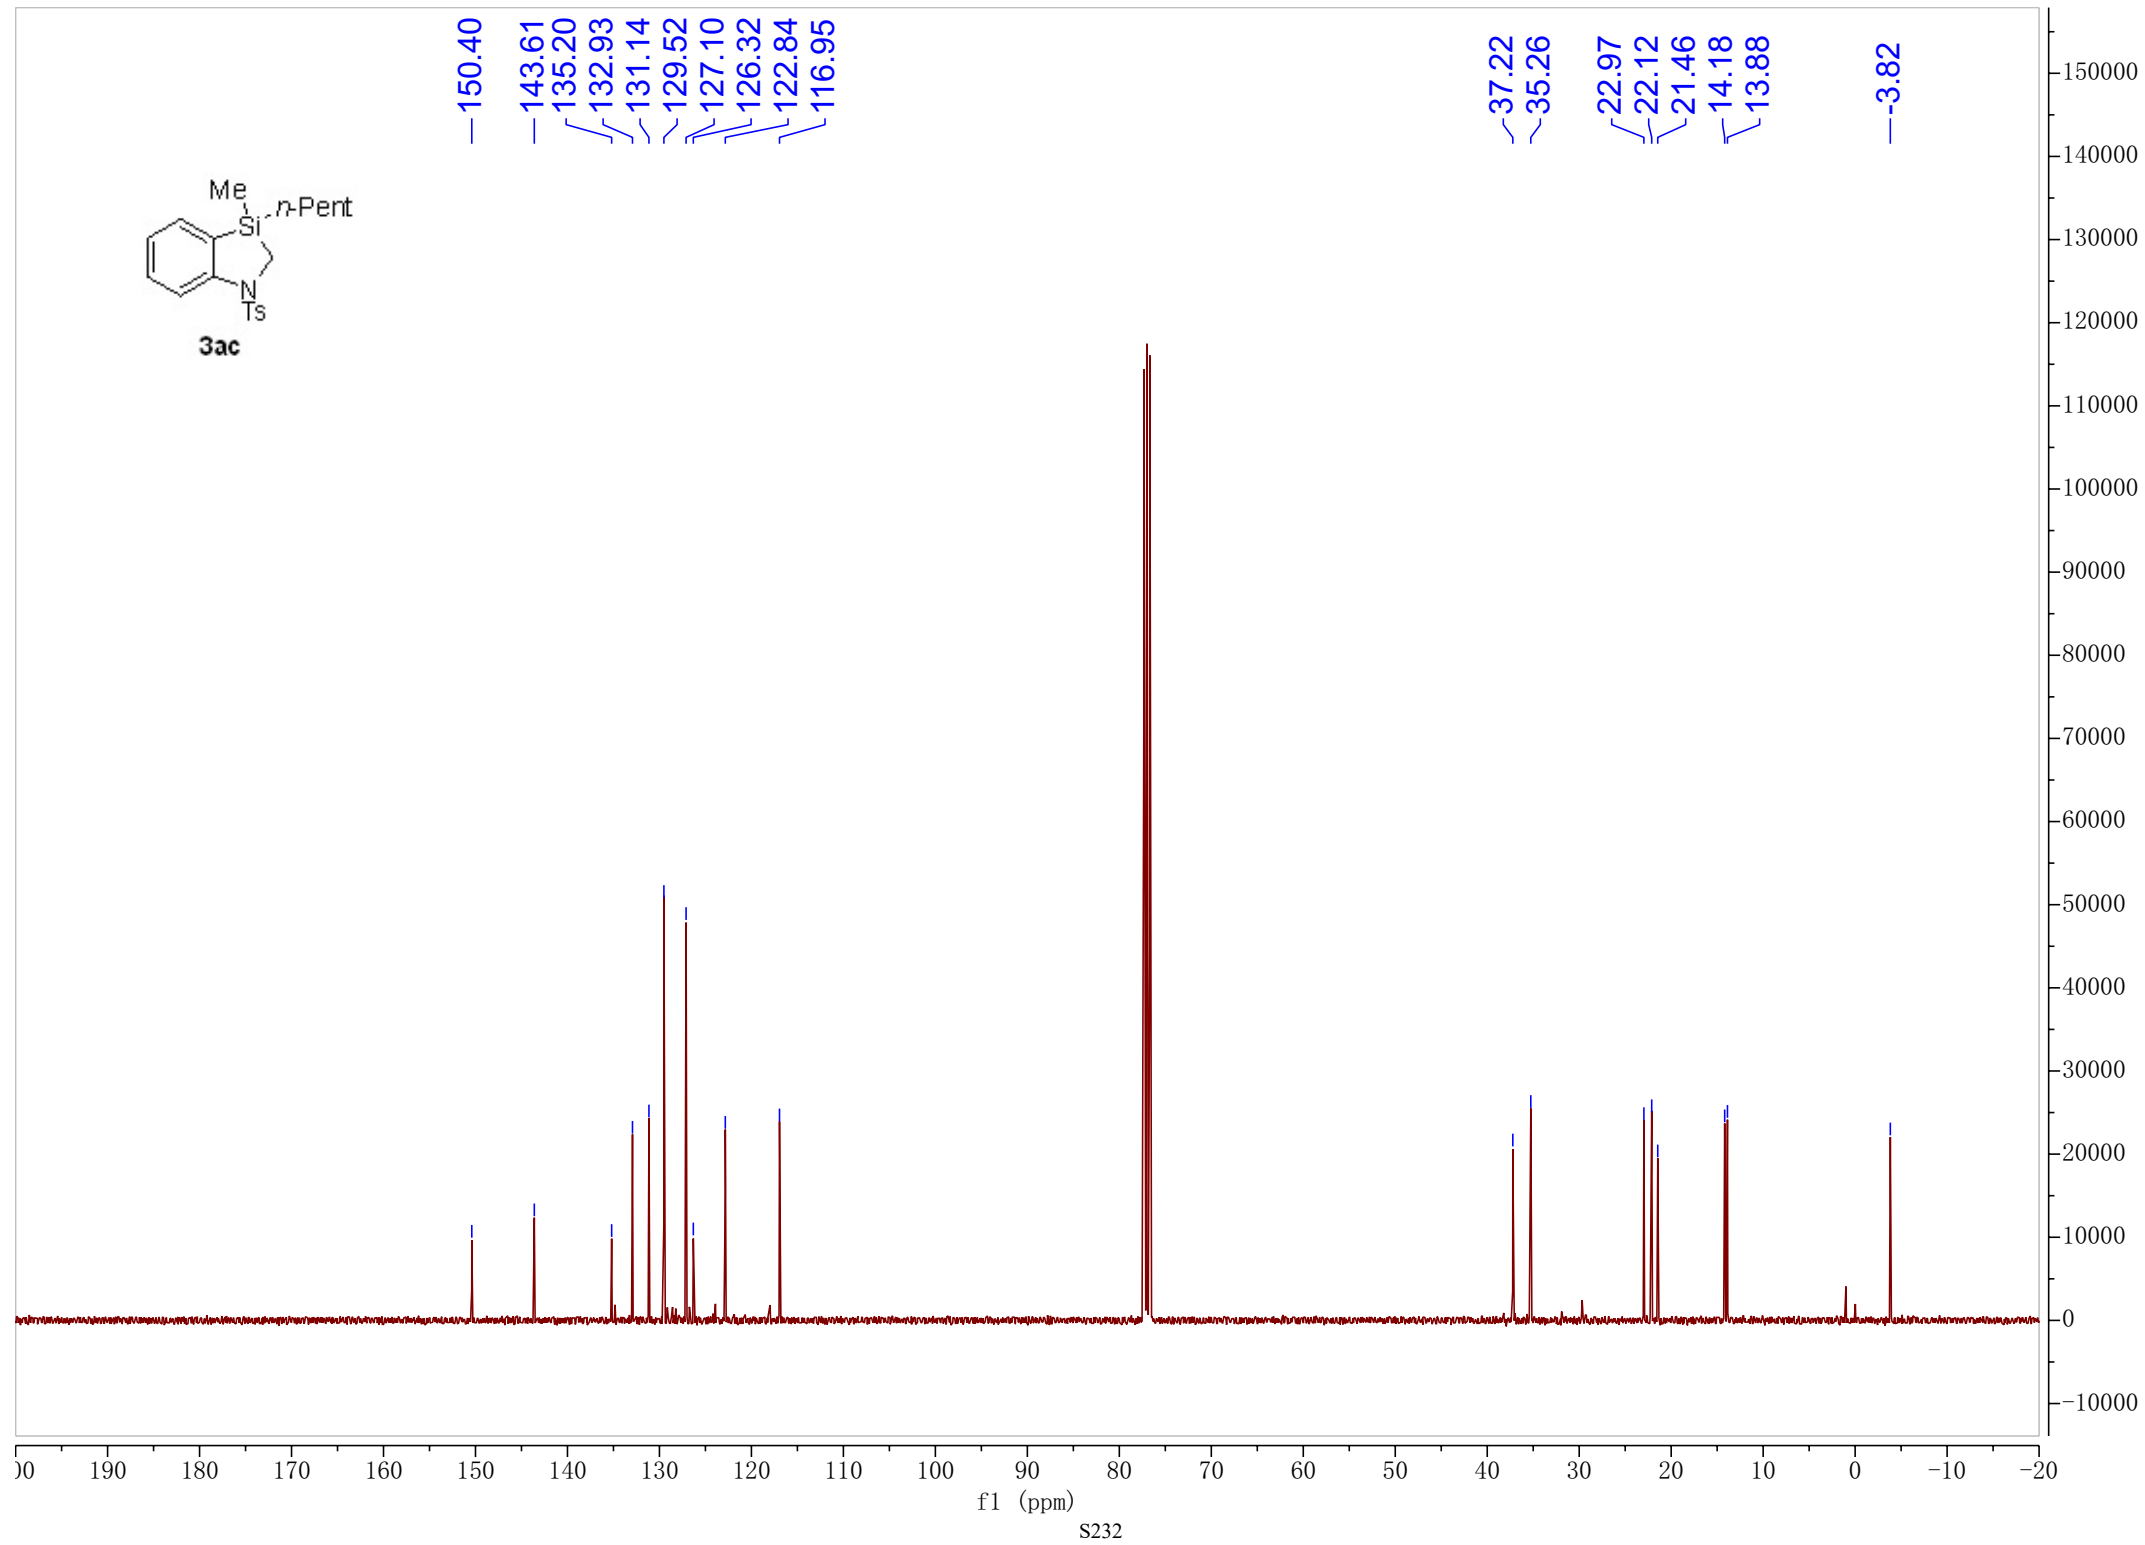



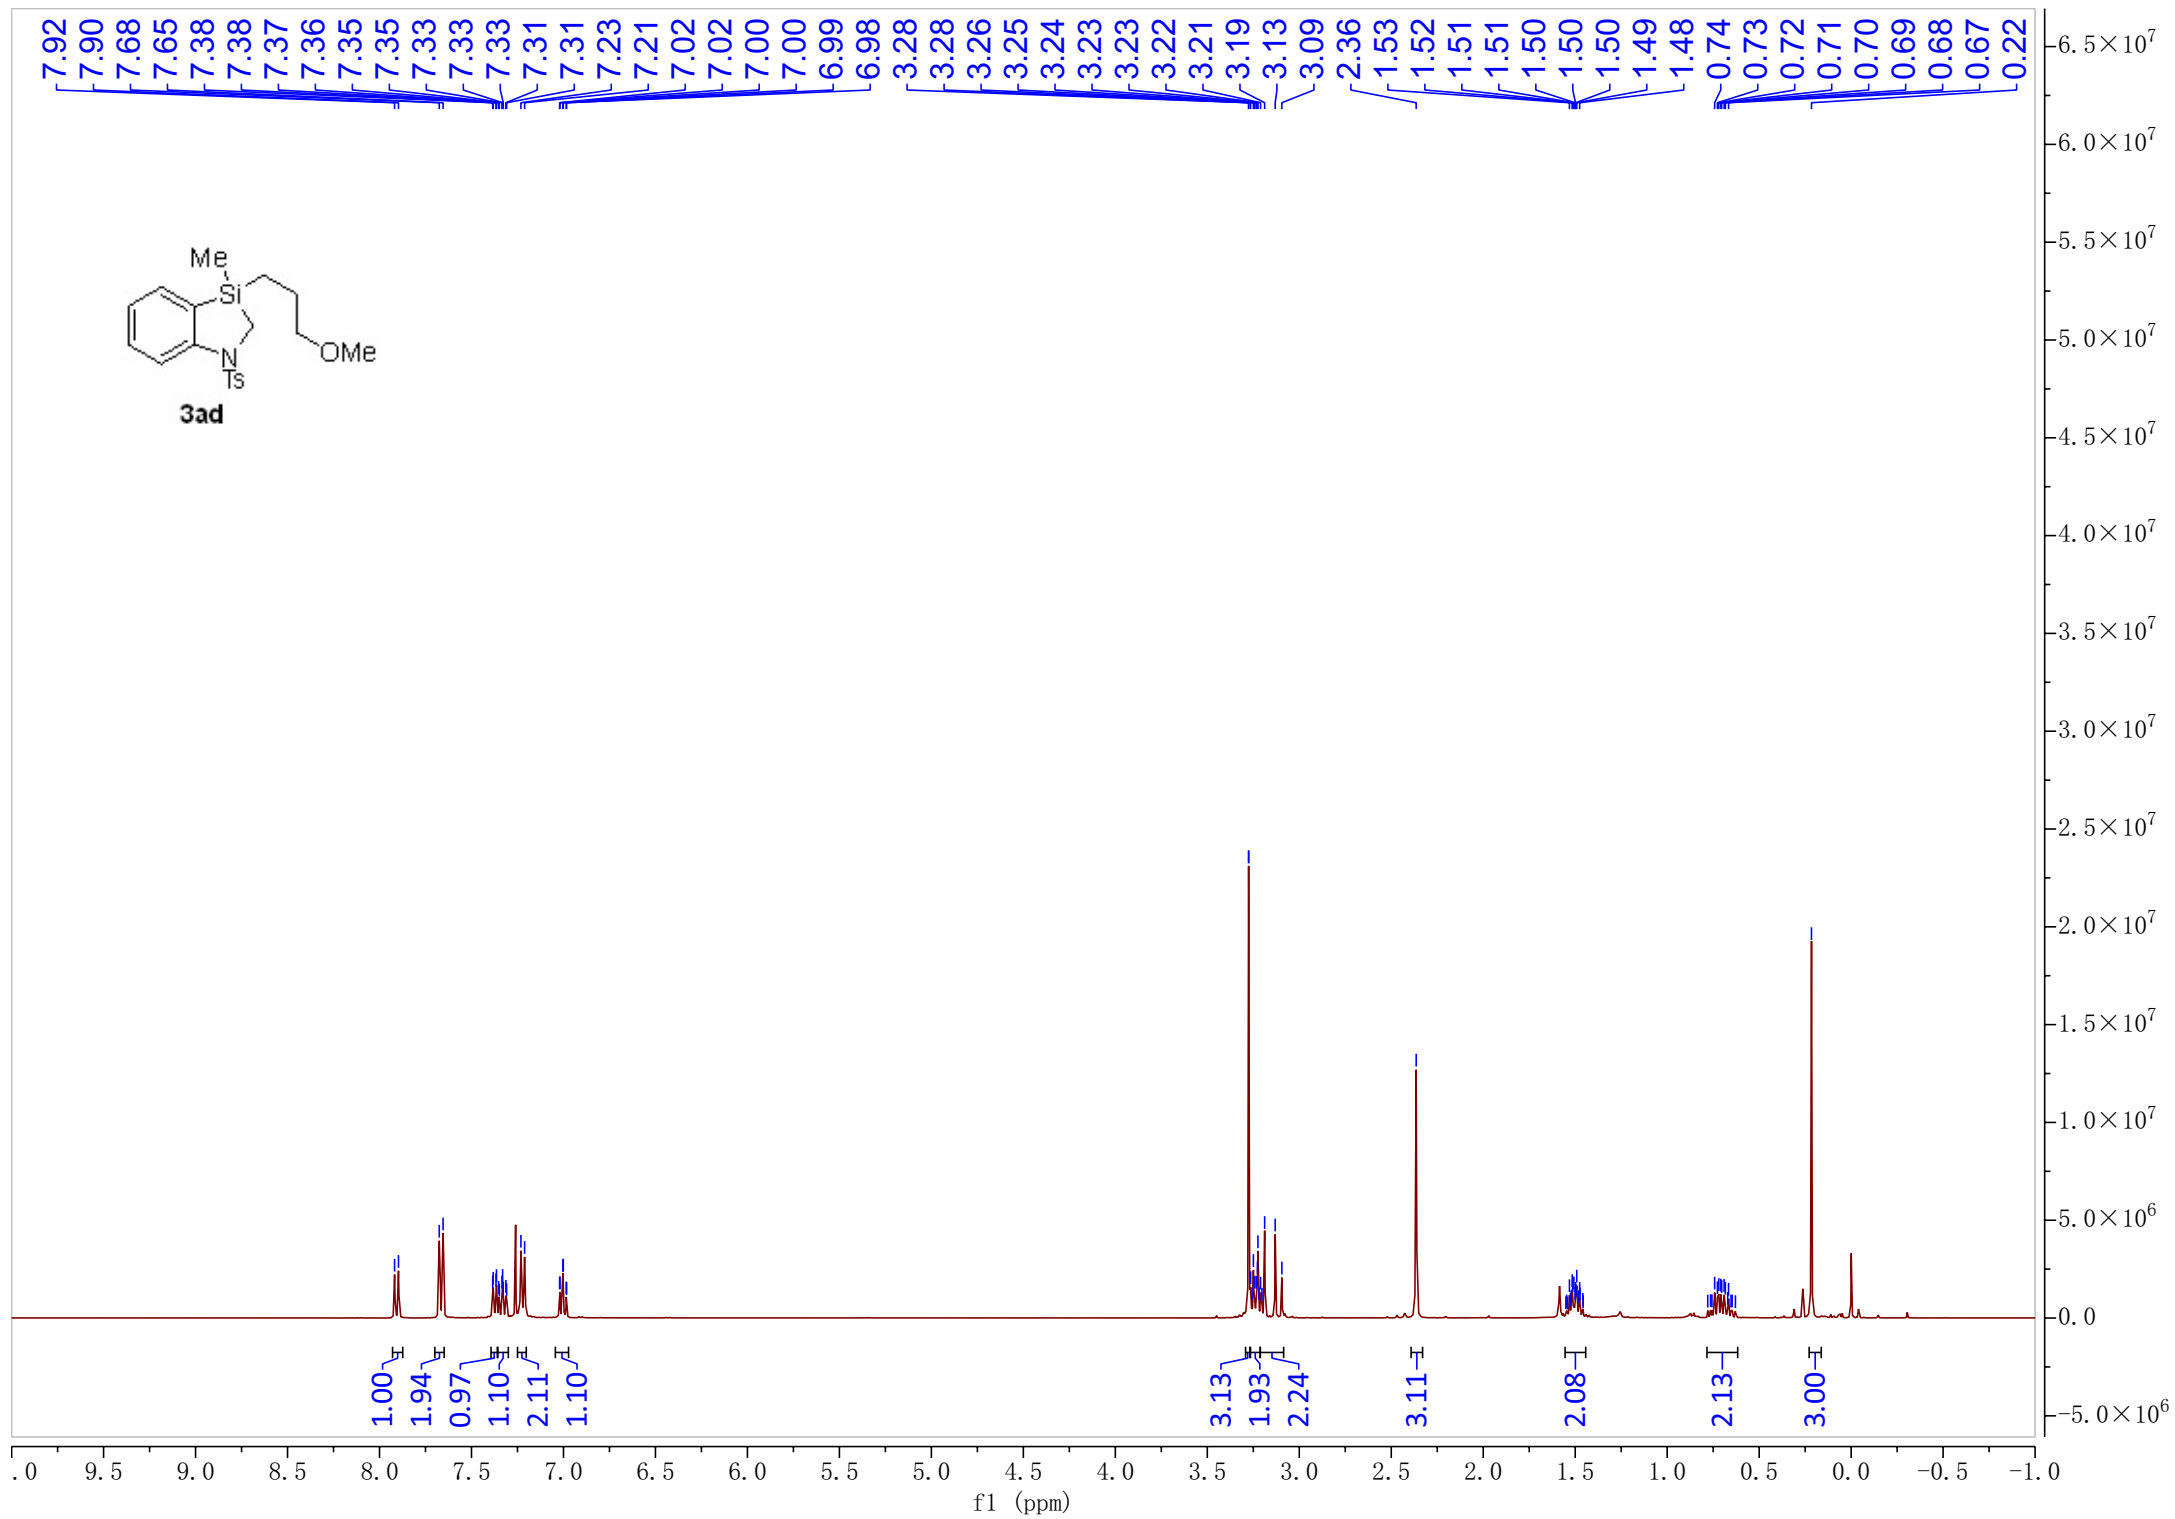

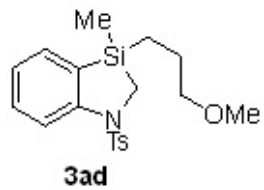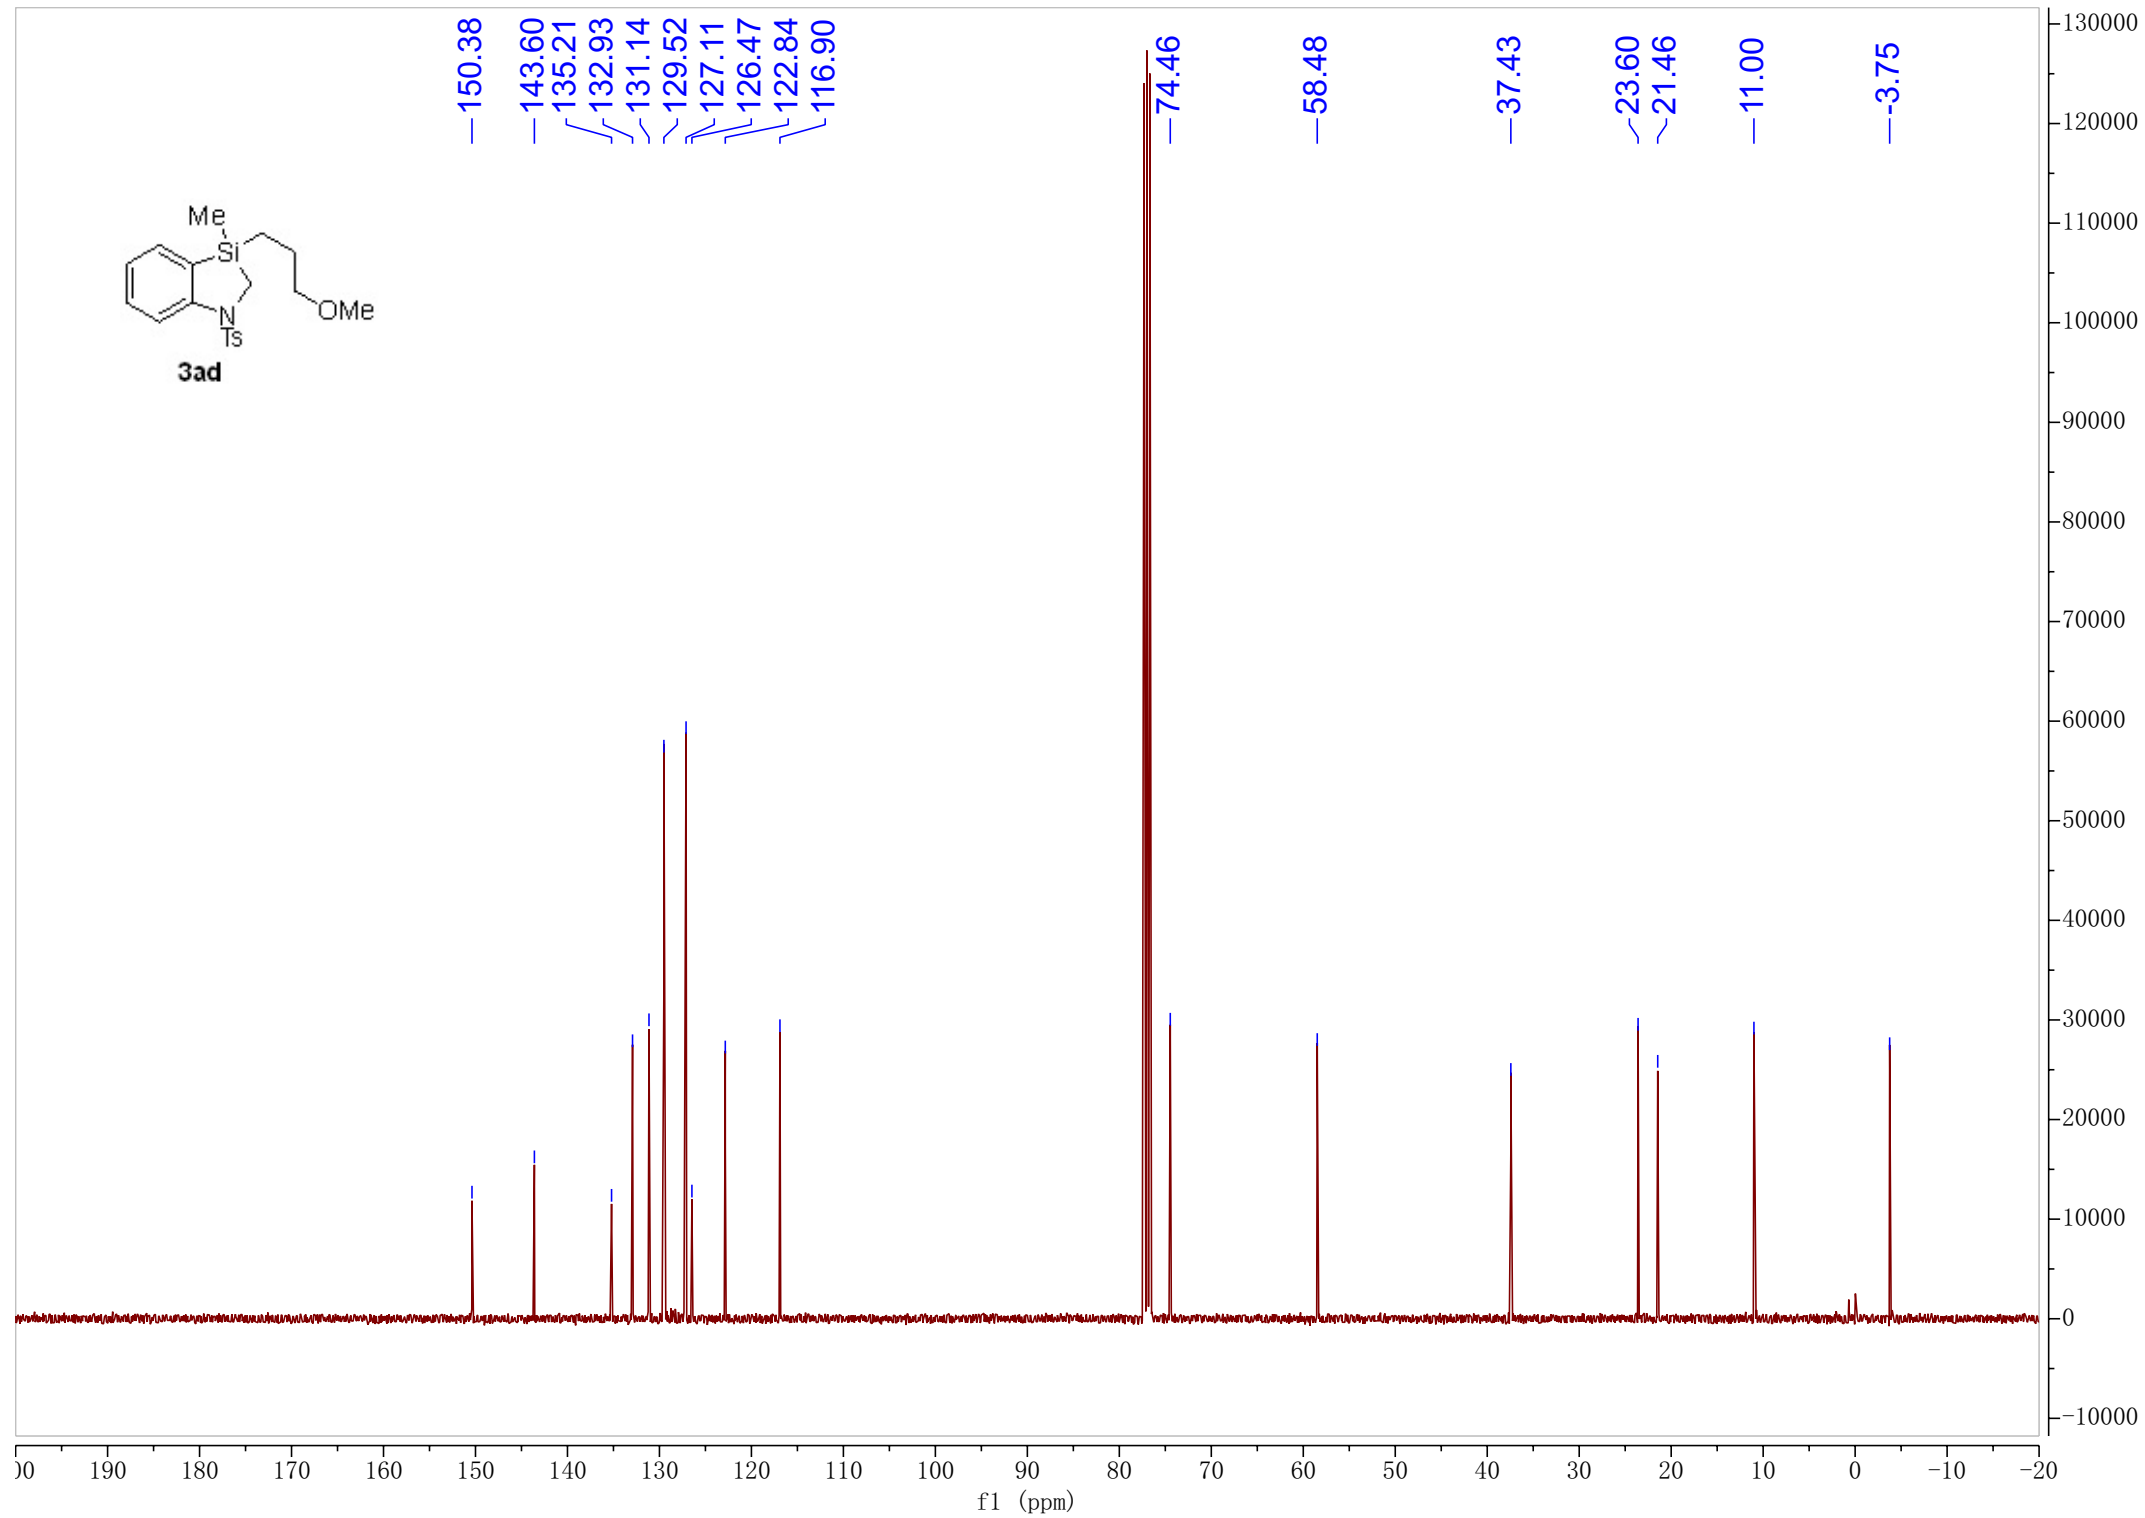

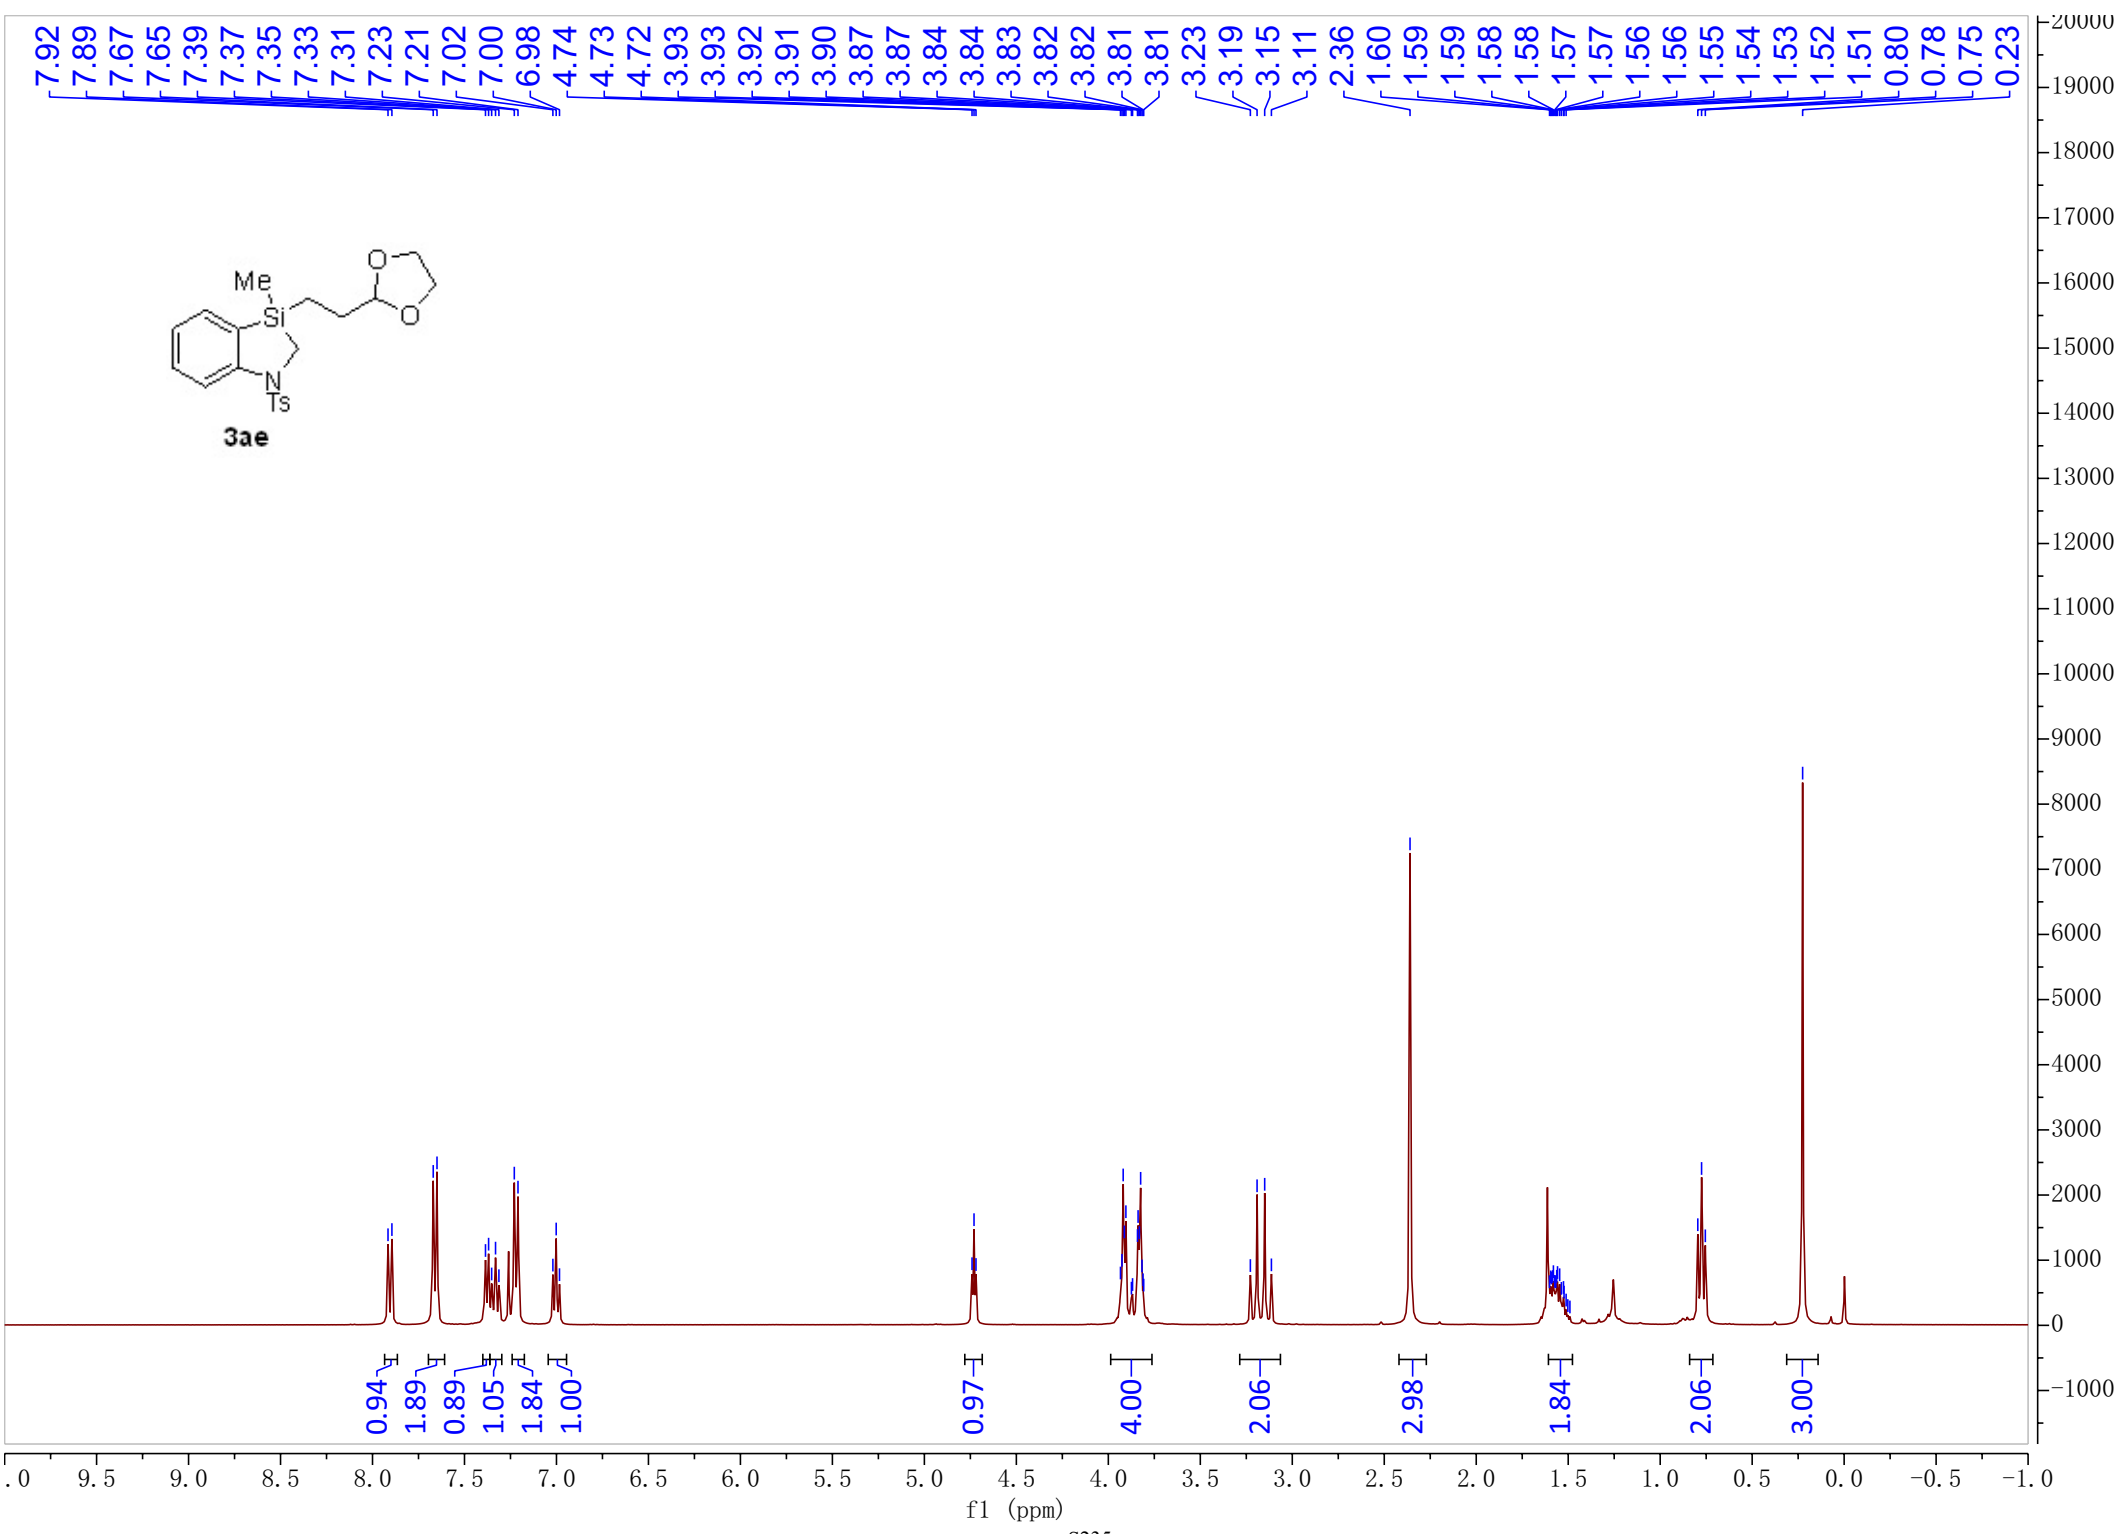

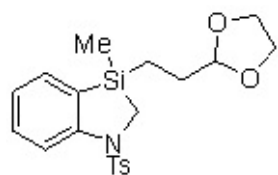

3ae

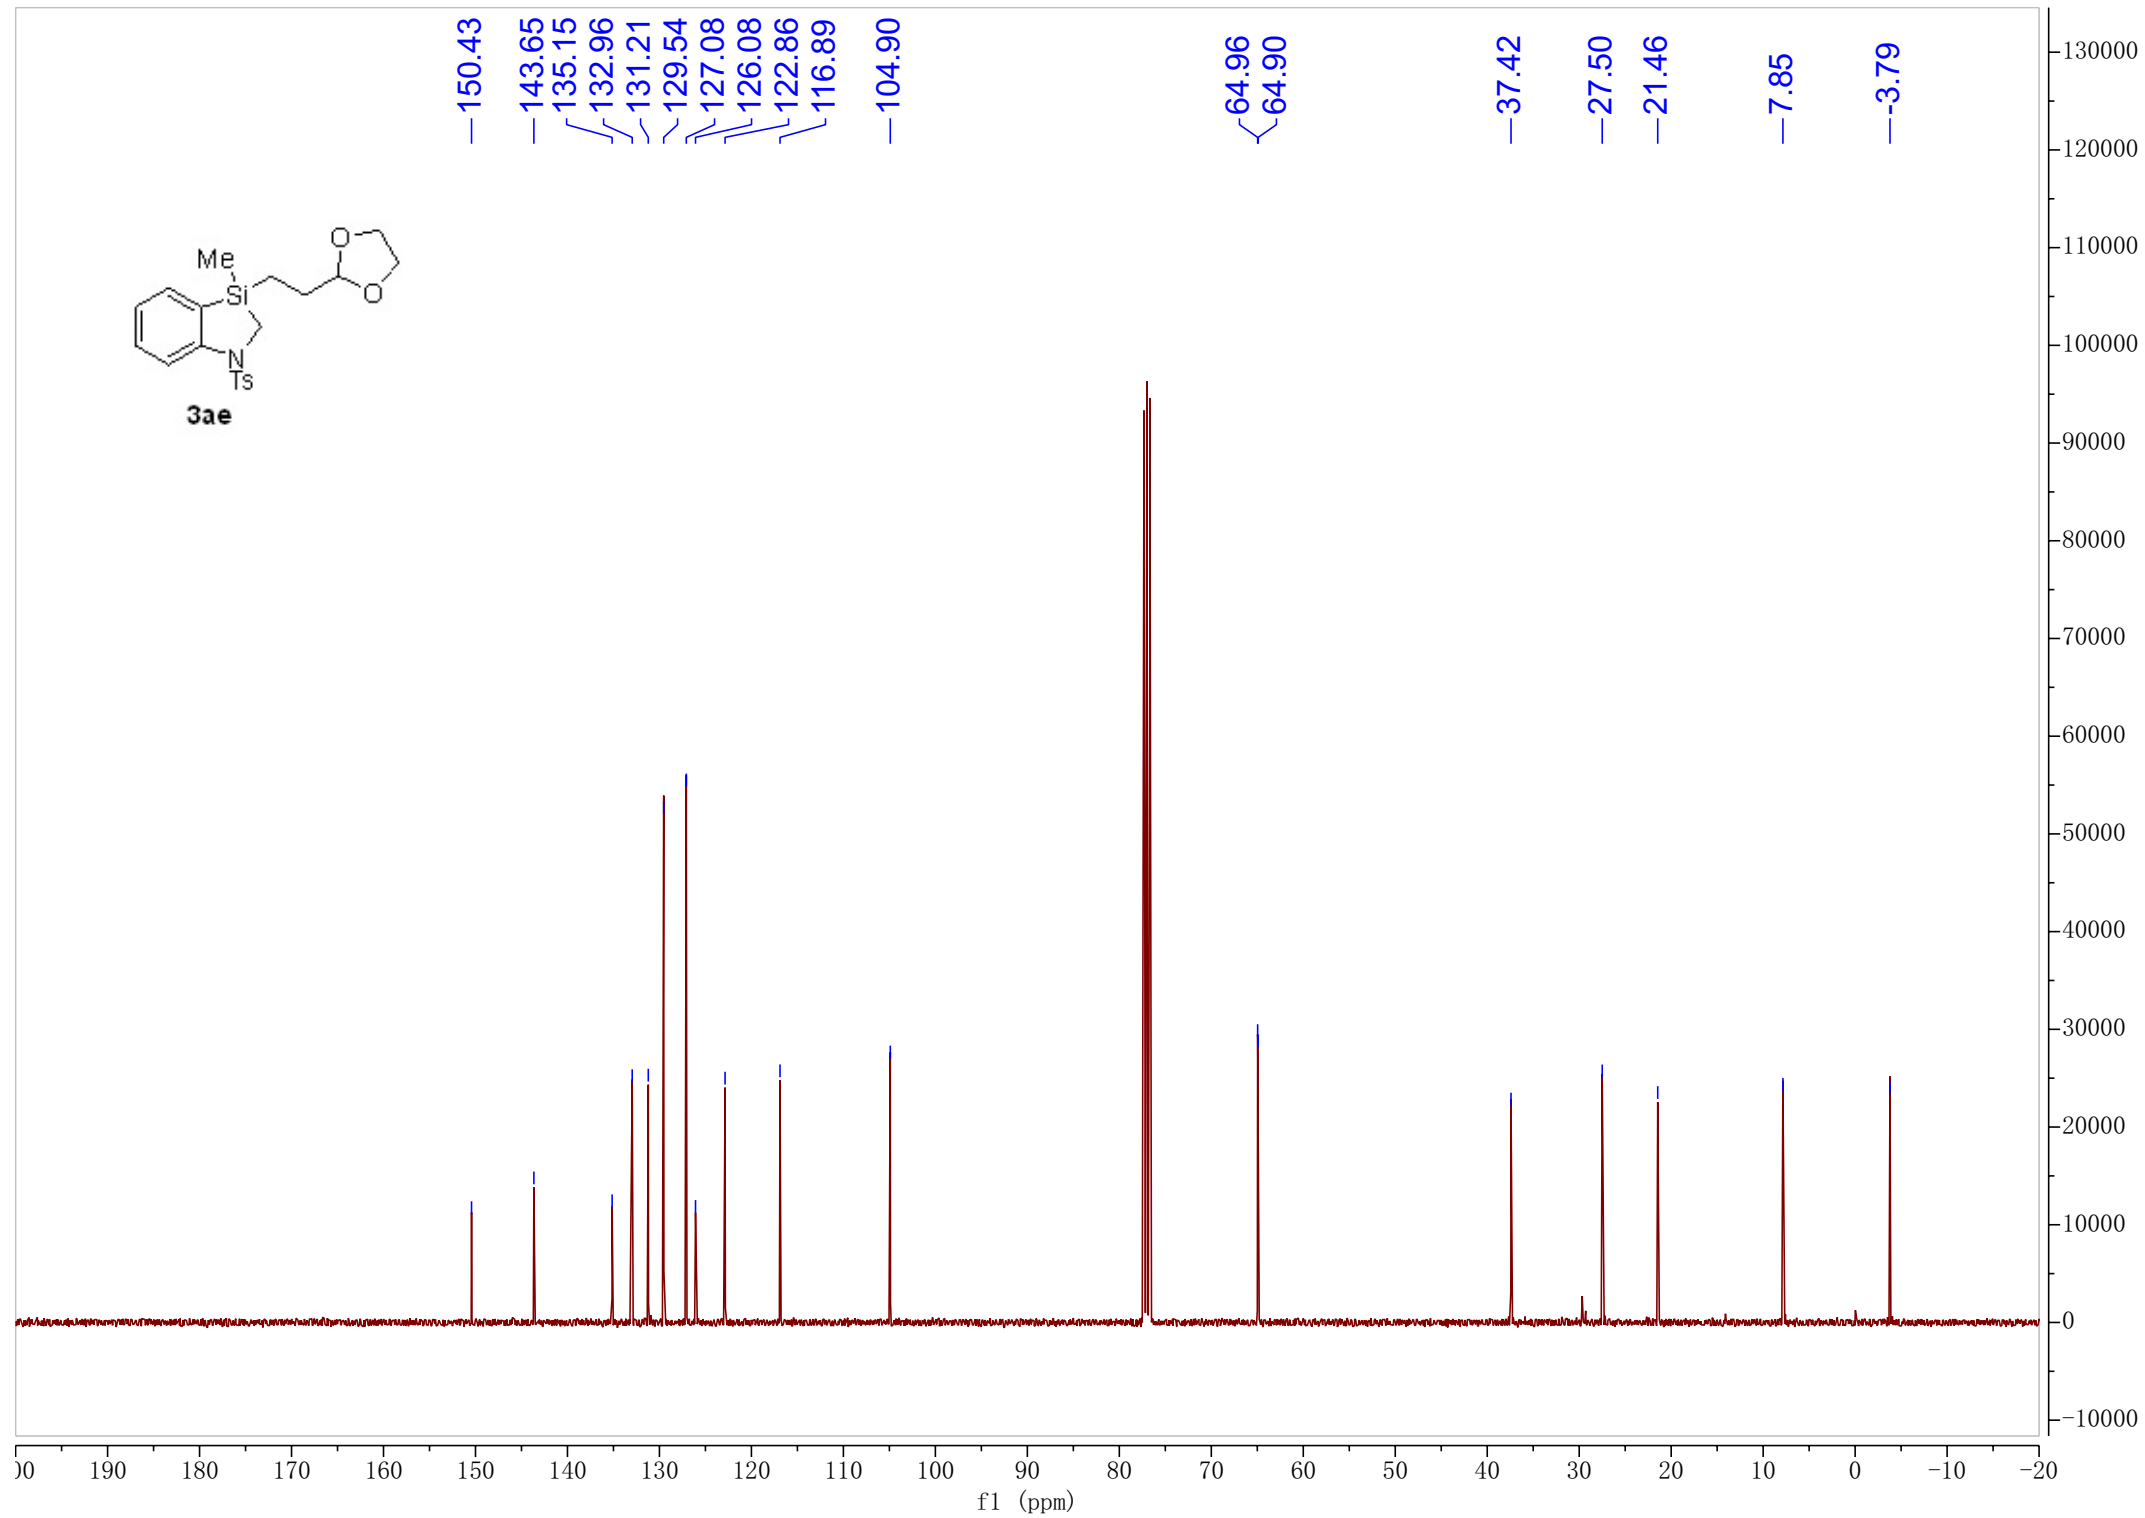

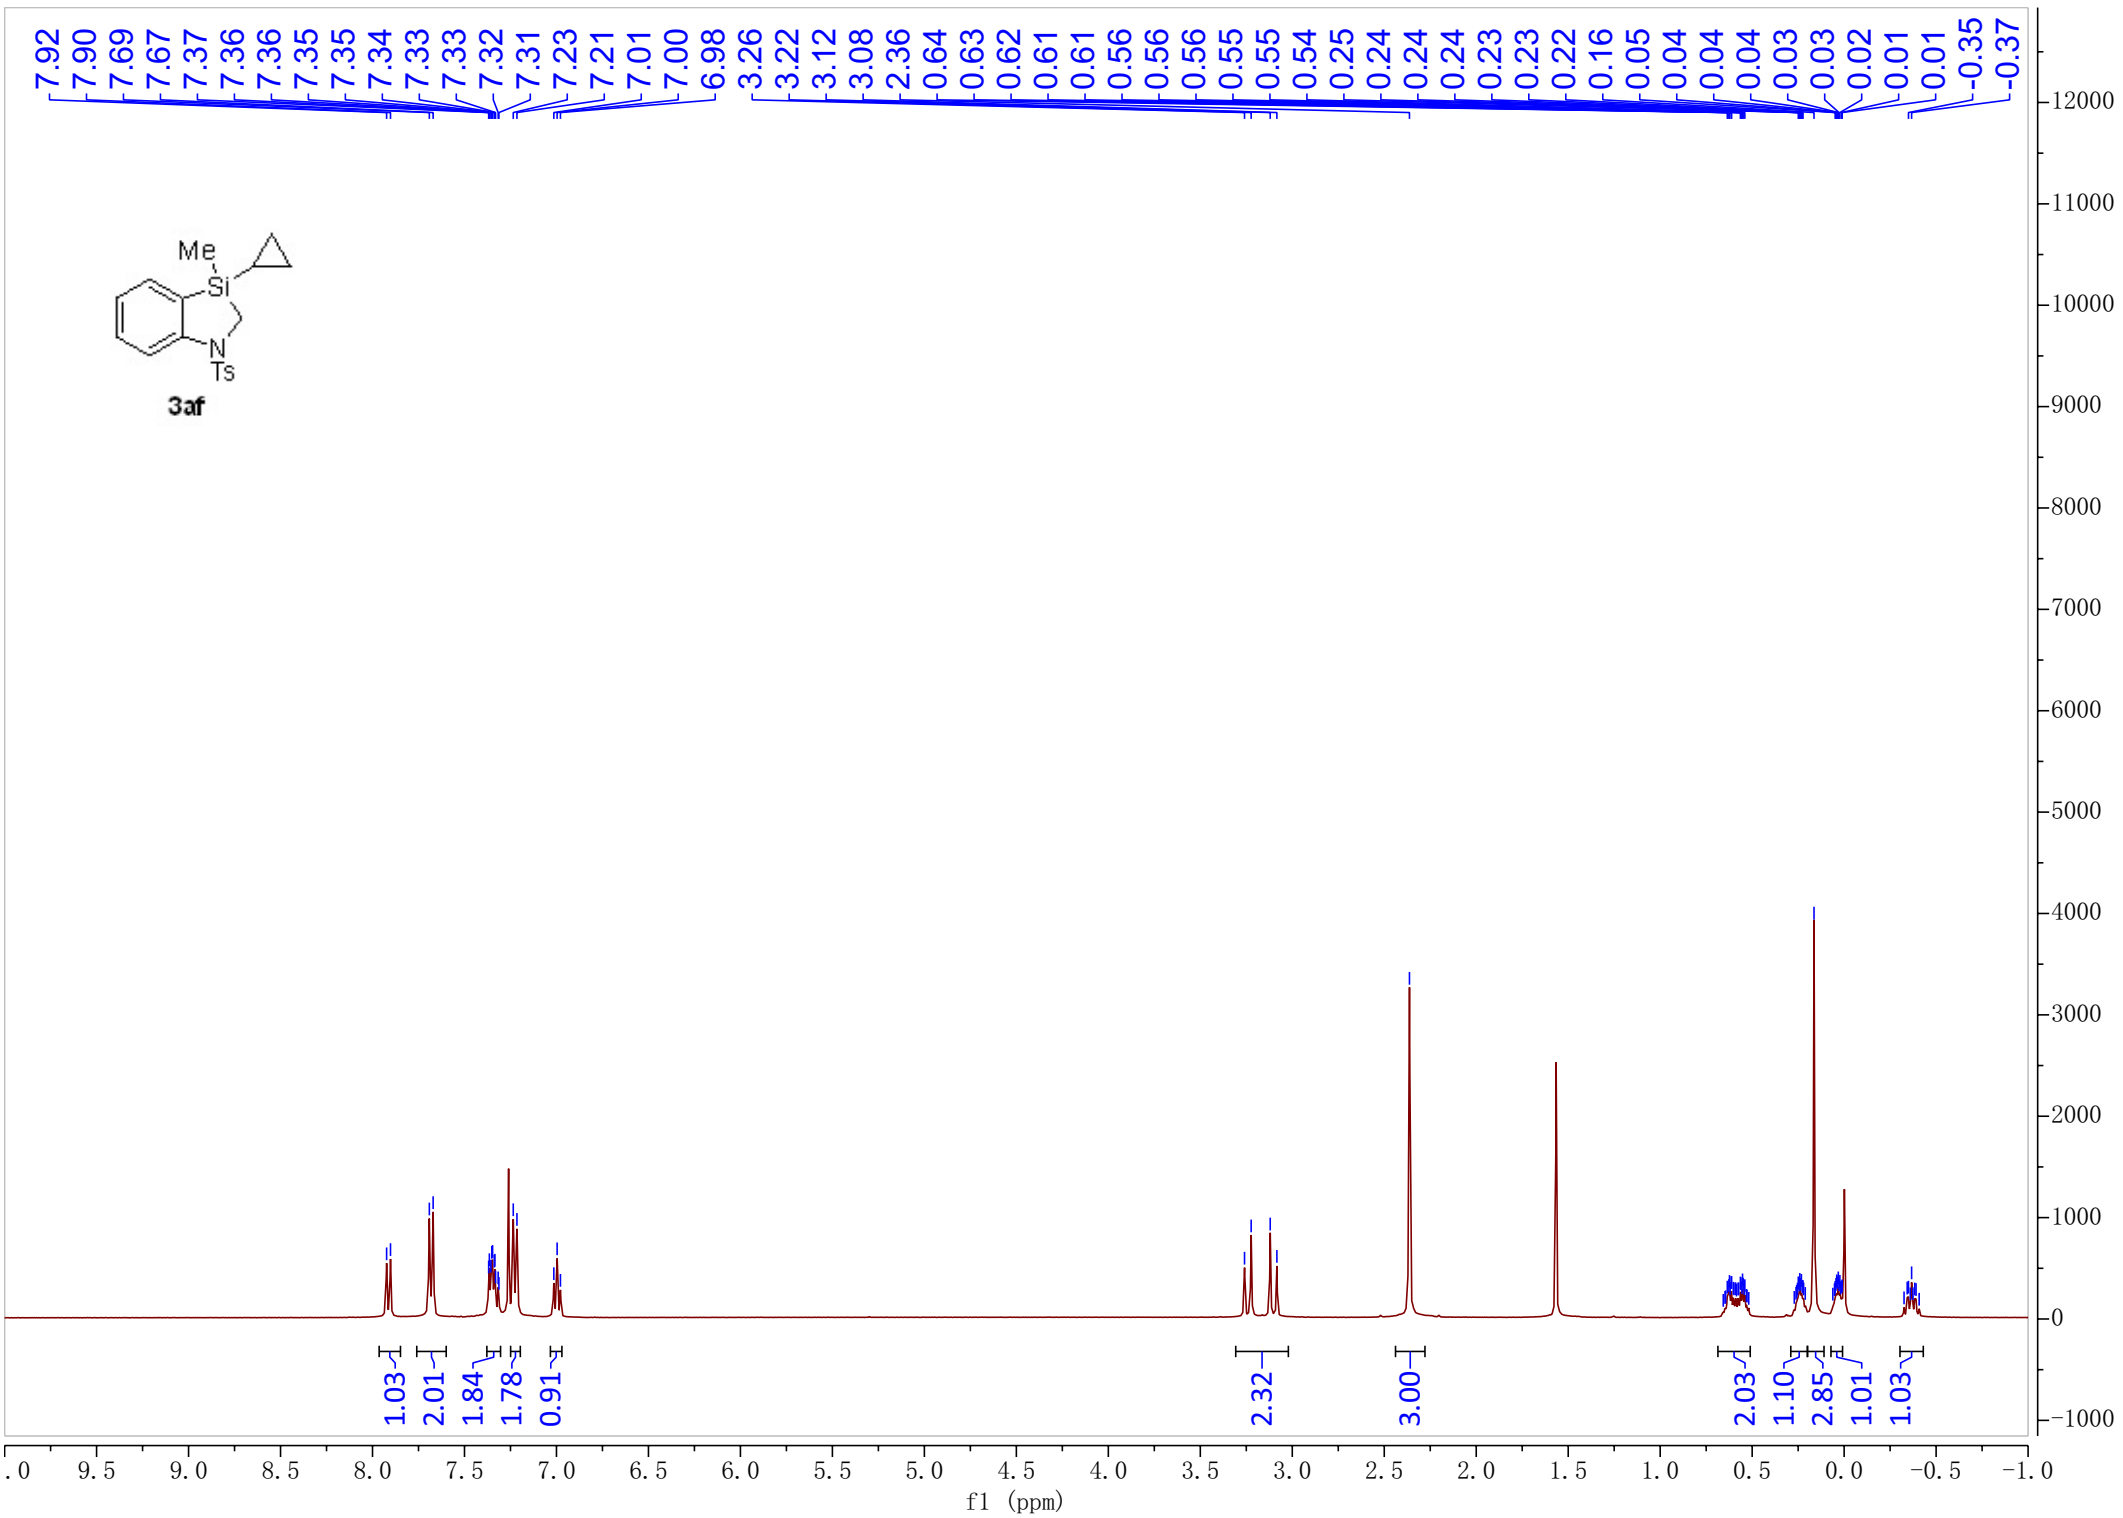

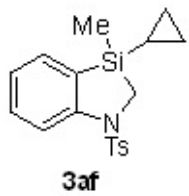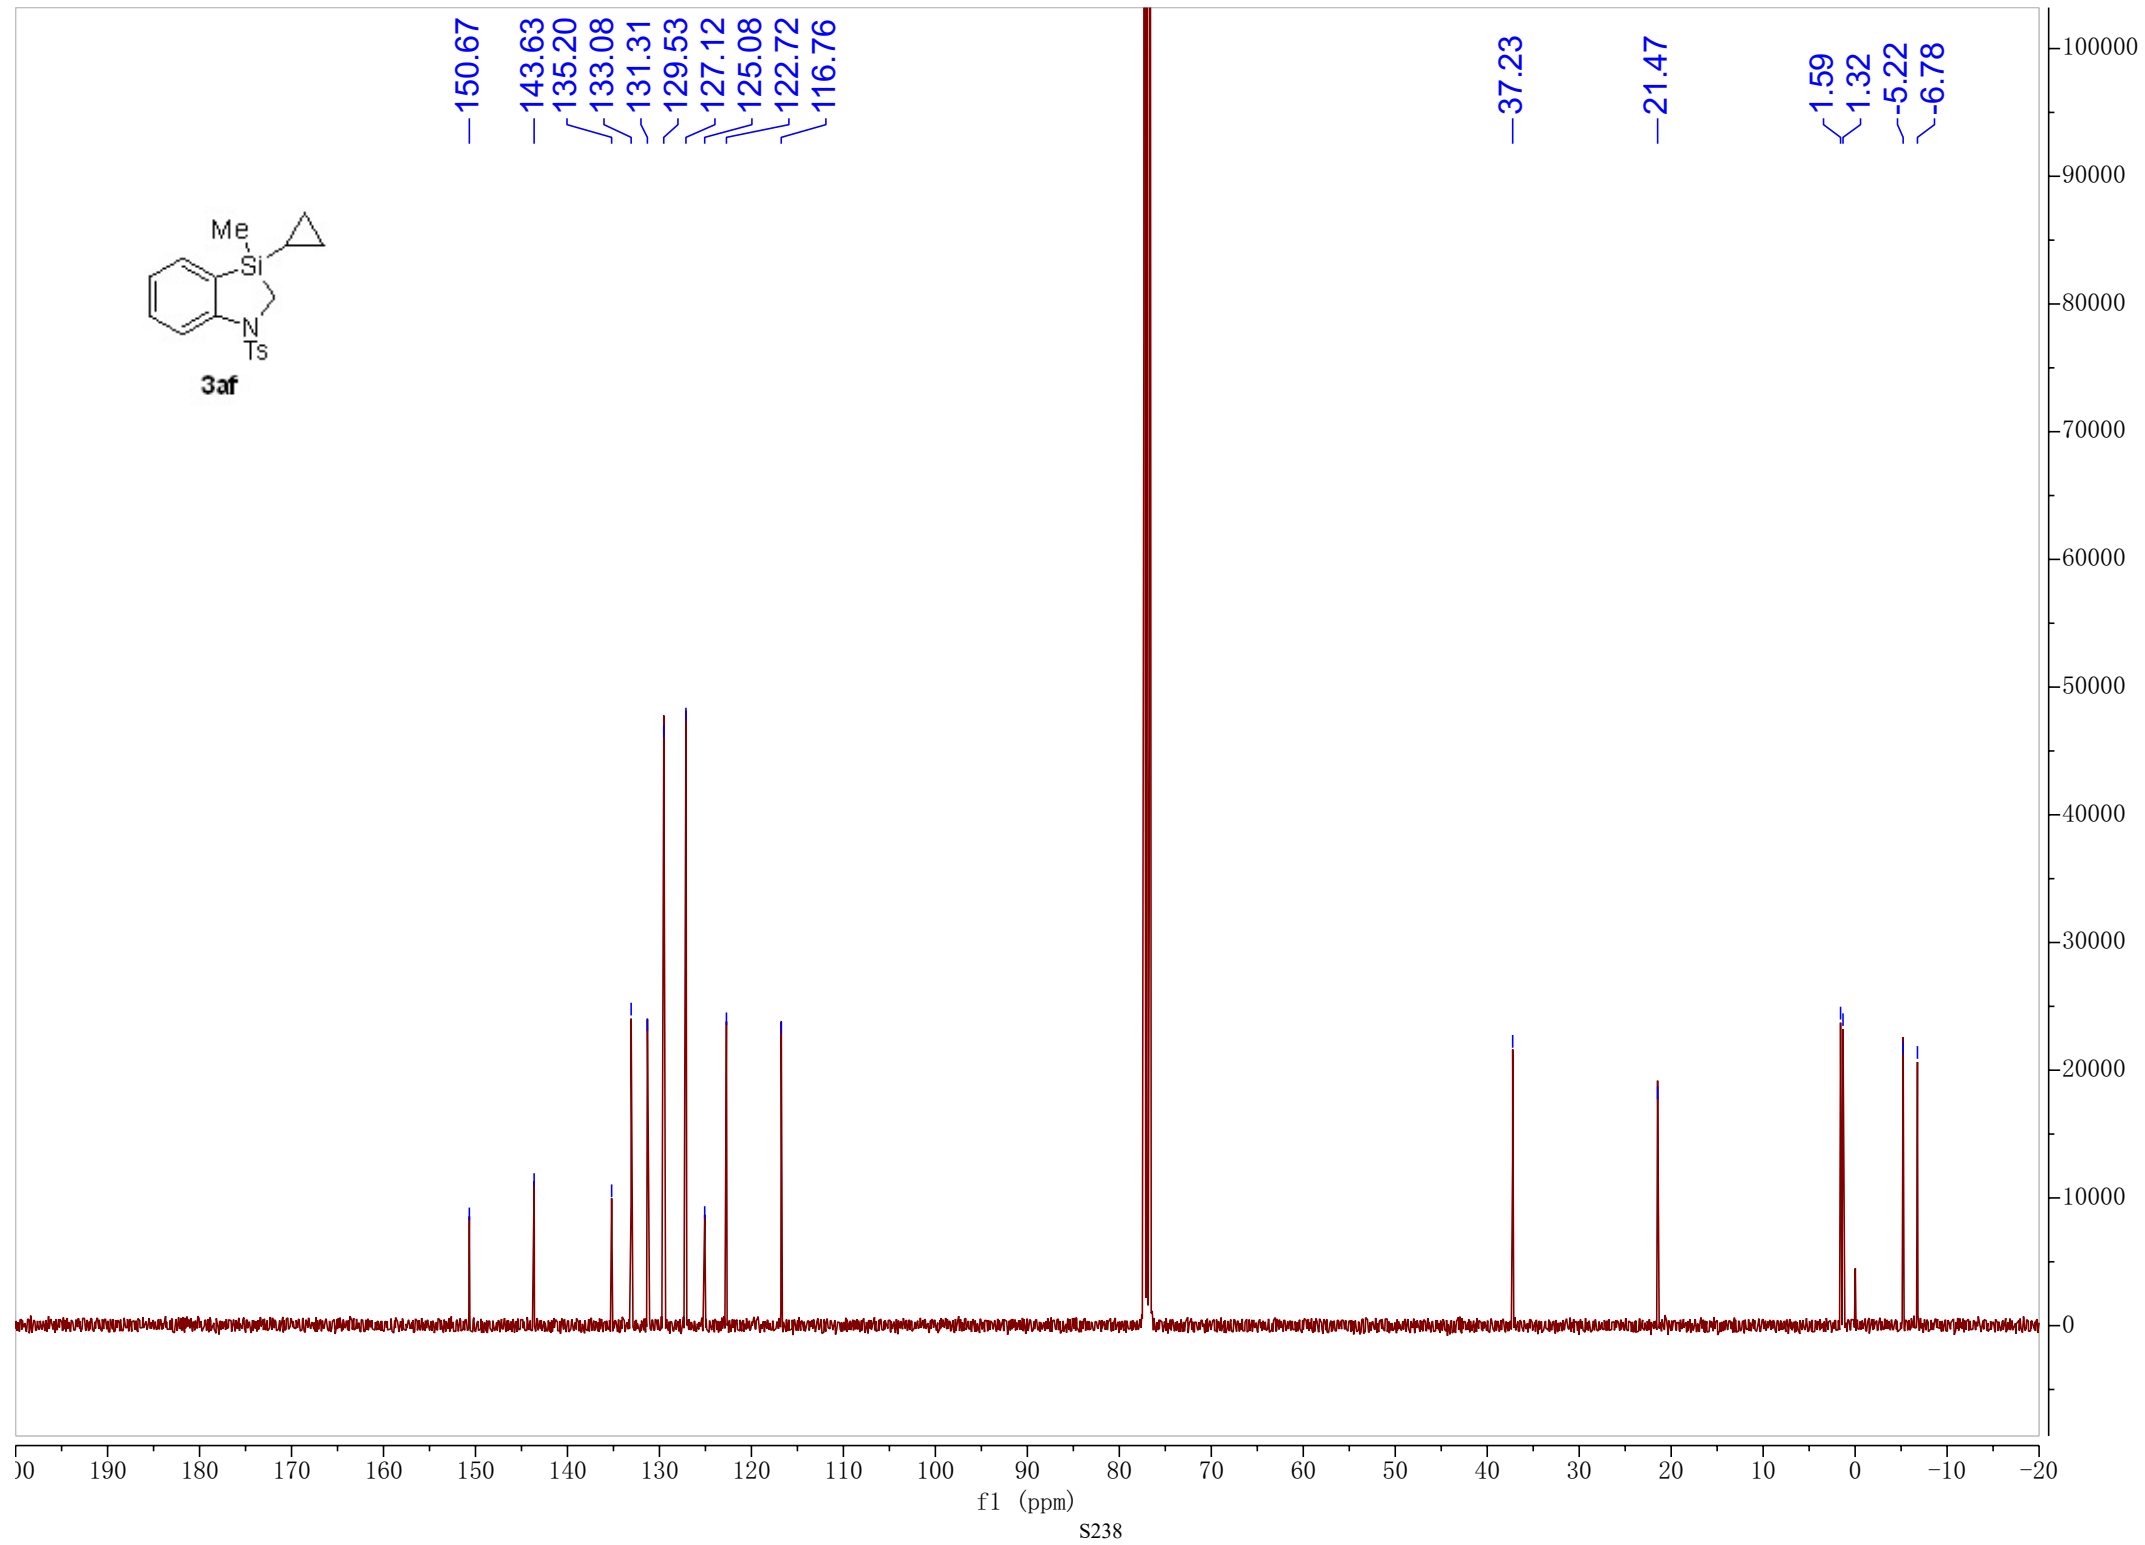

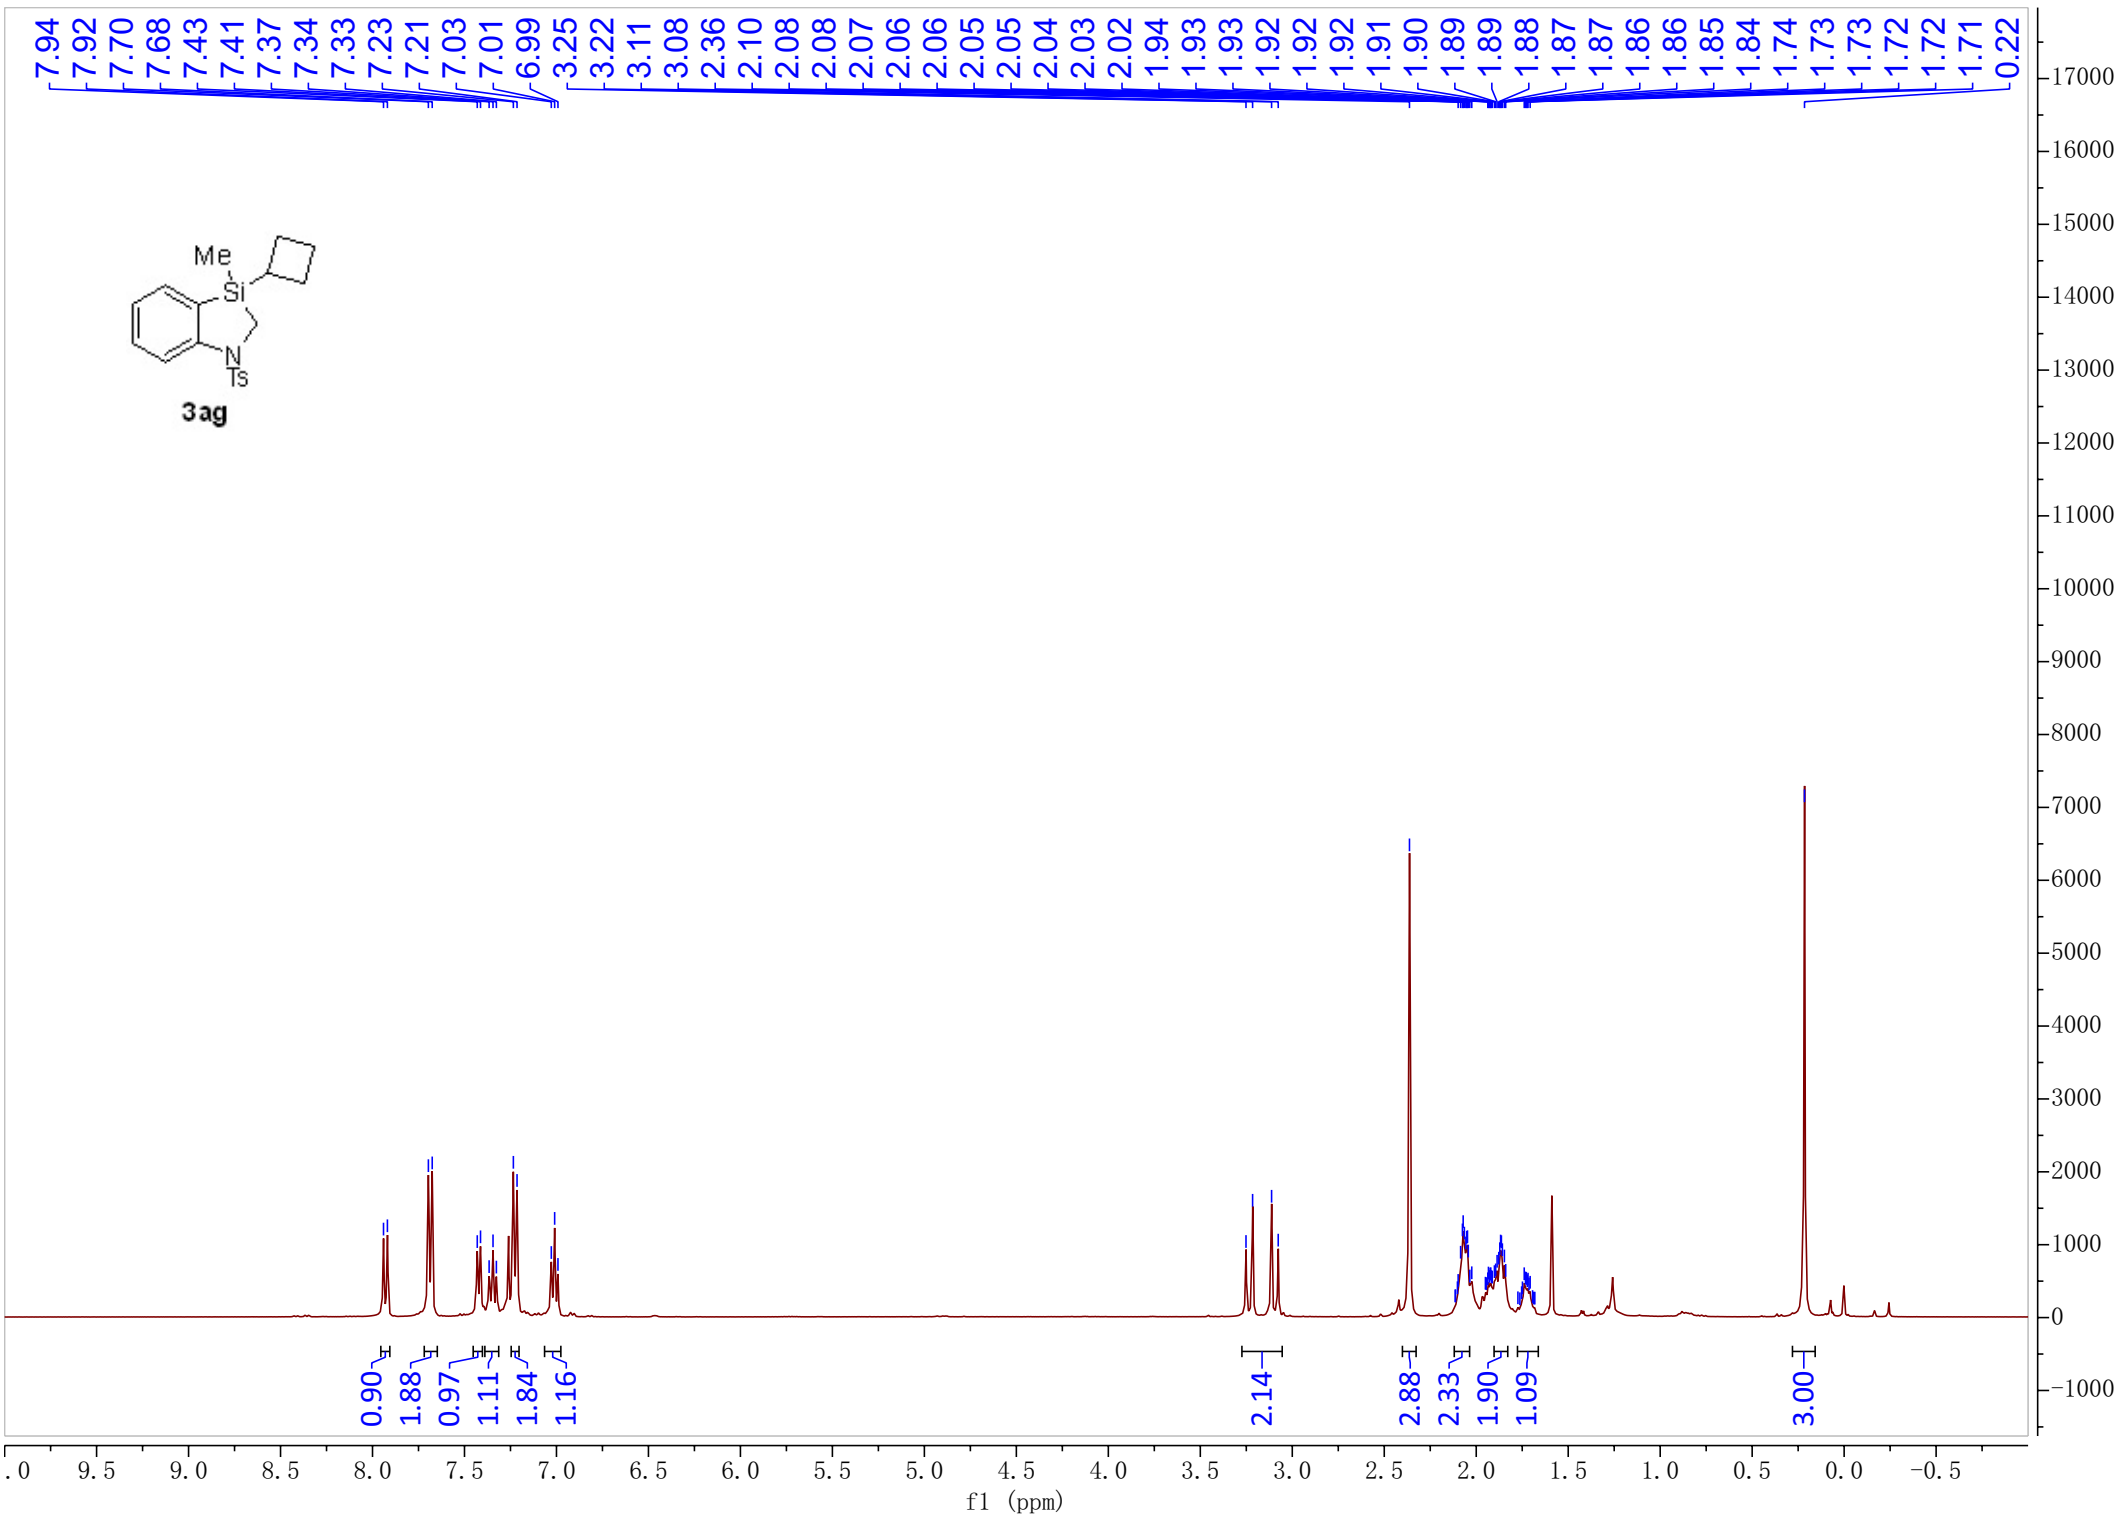

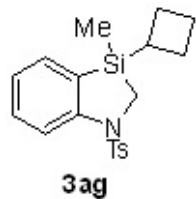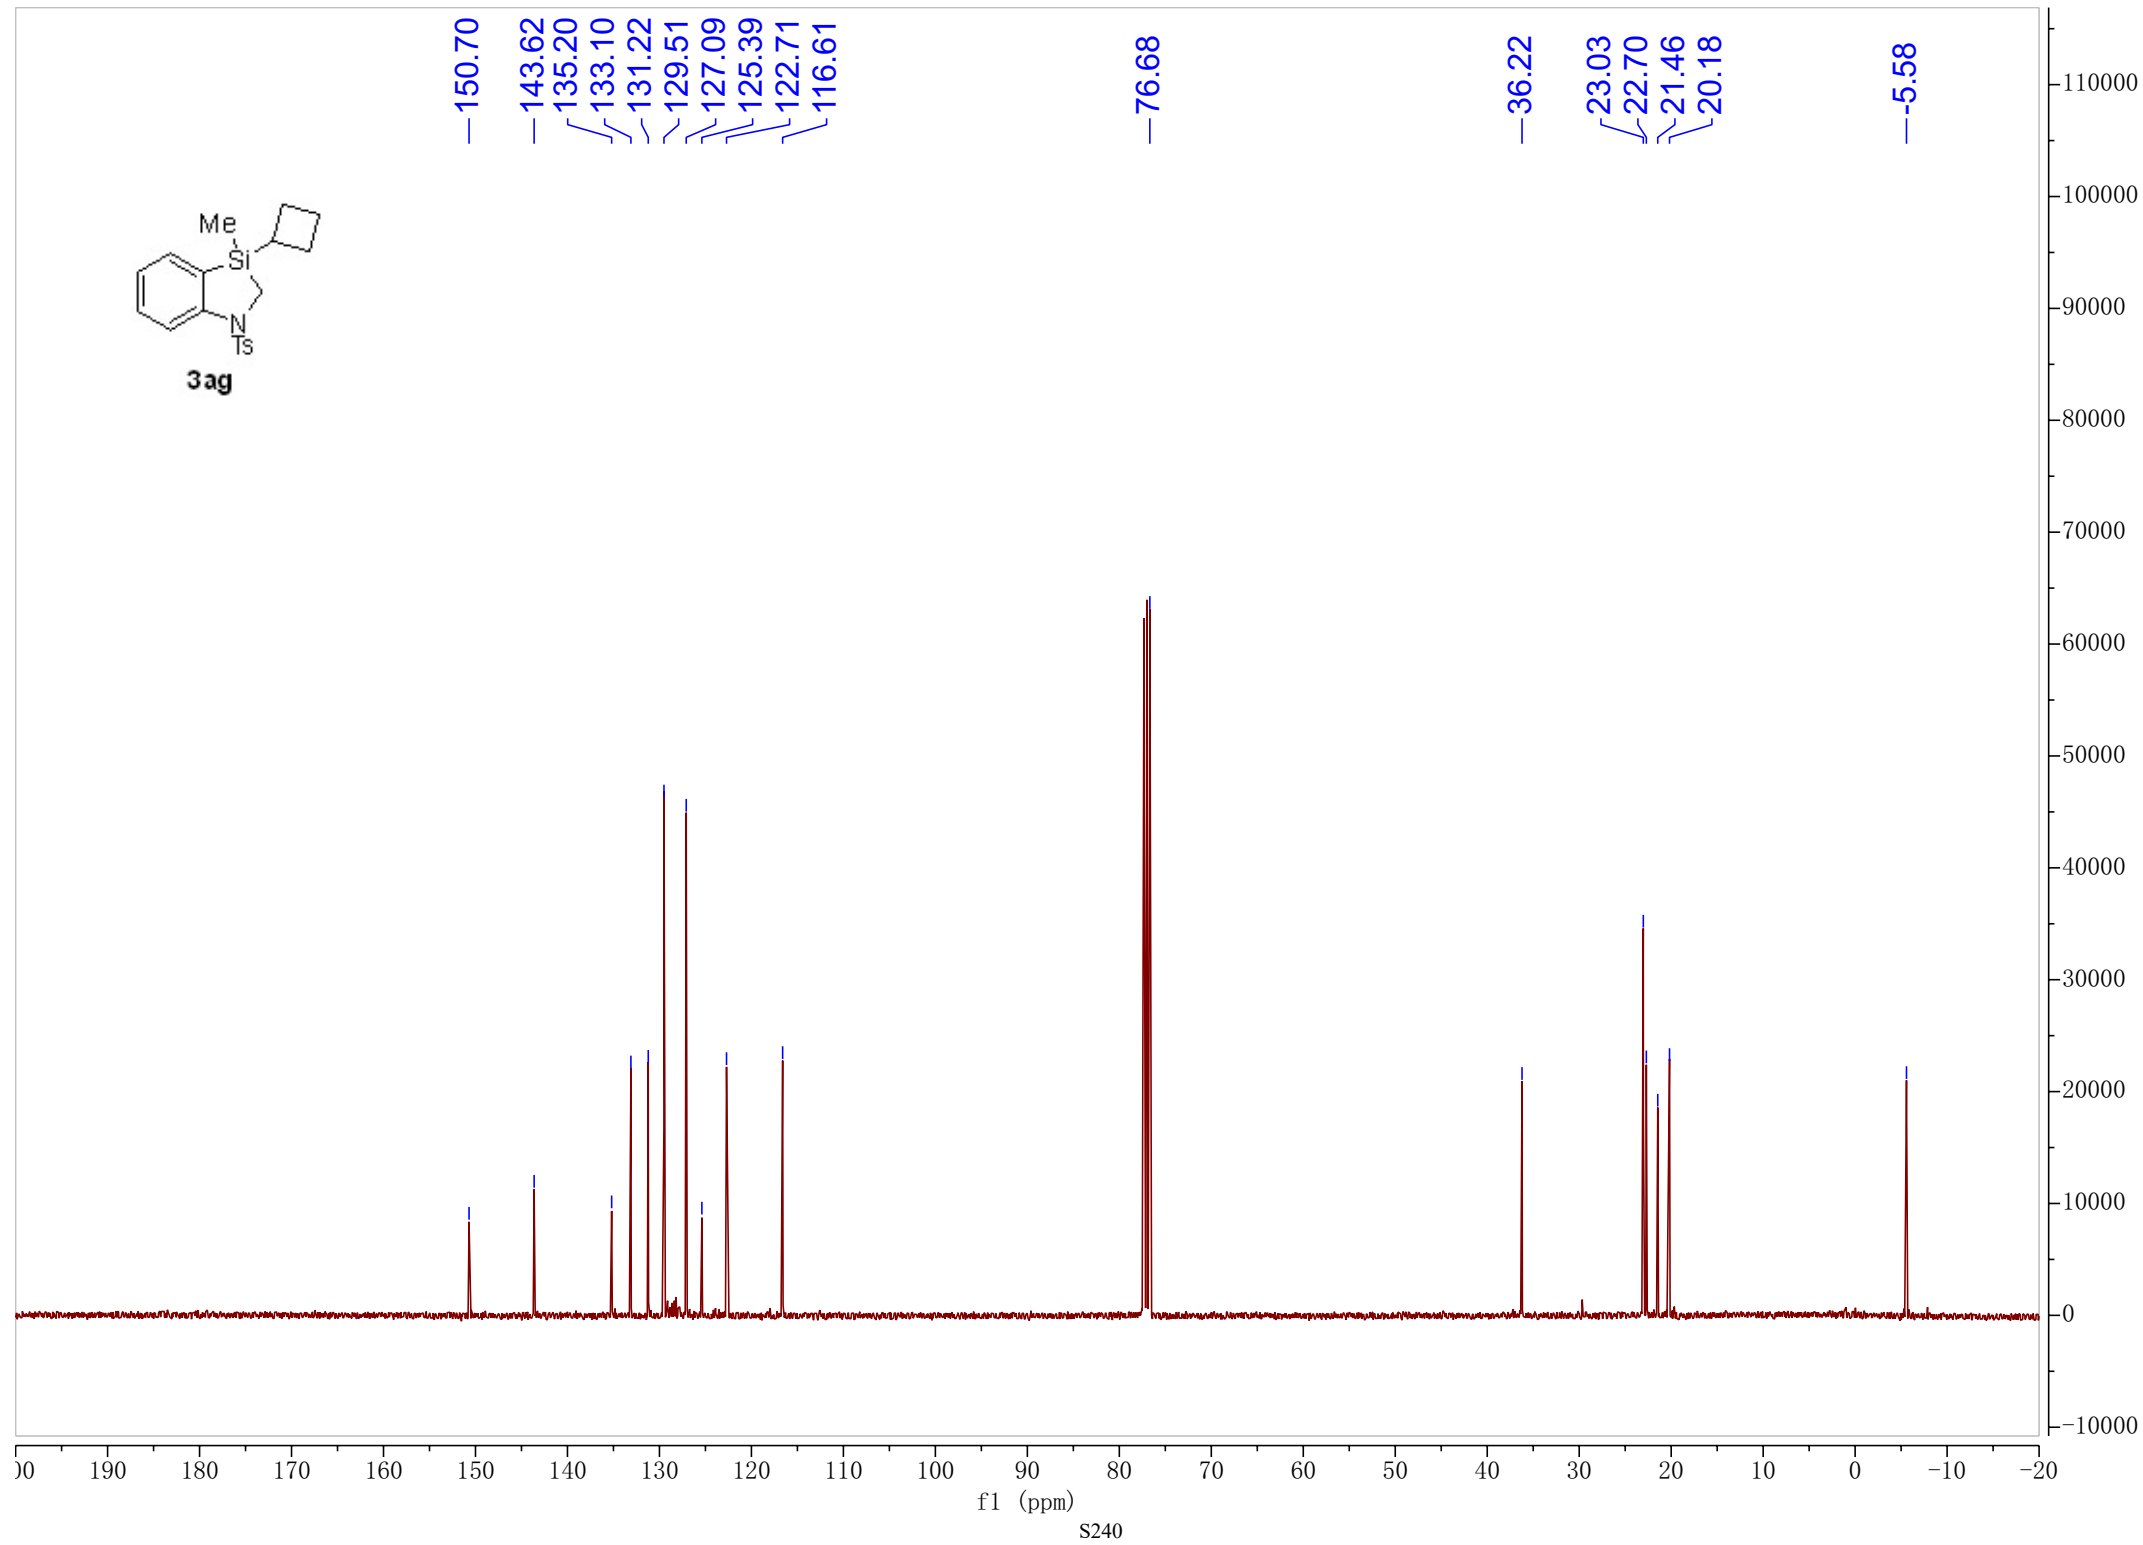



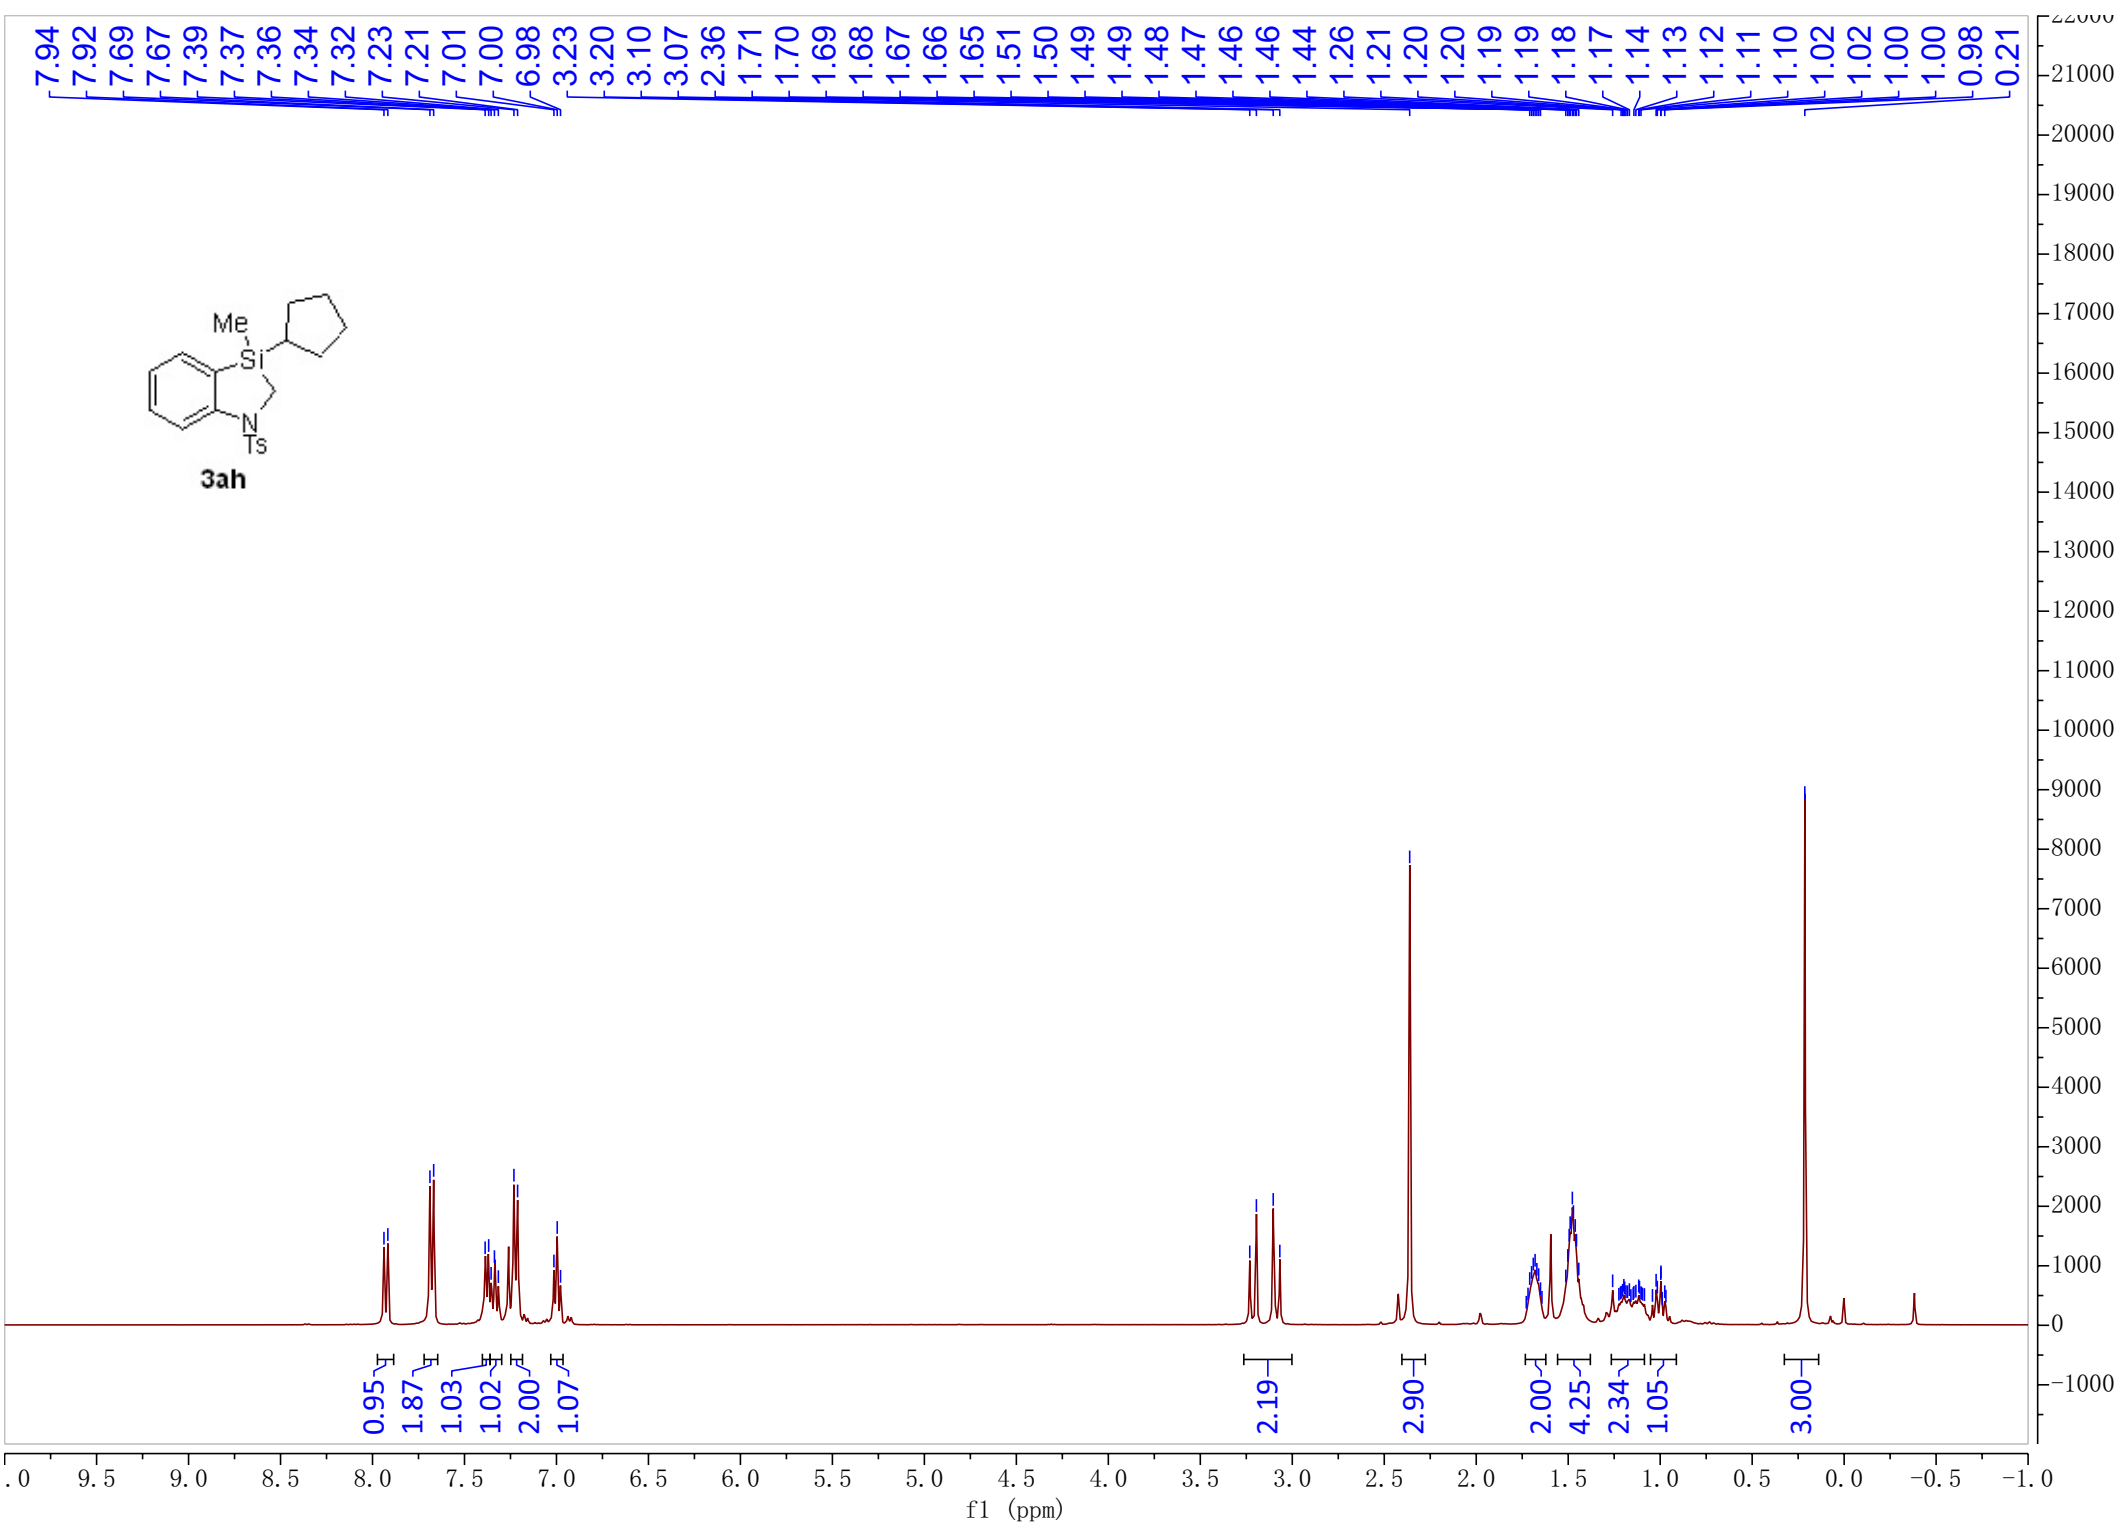

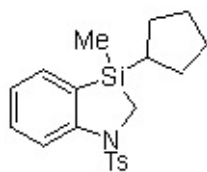

3ah

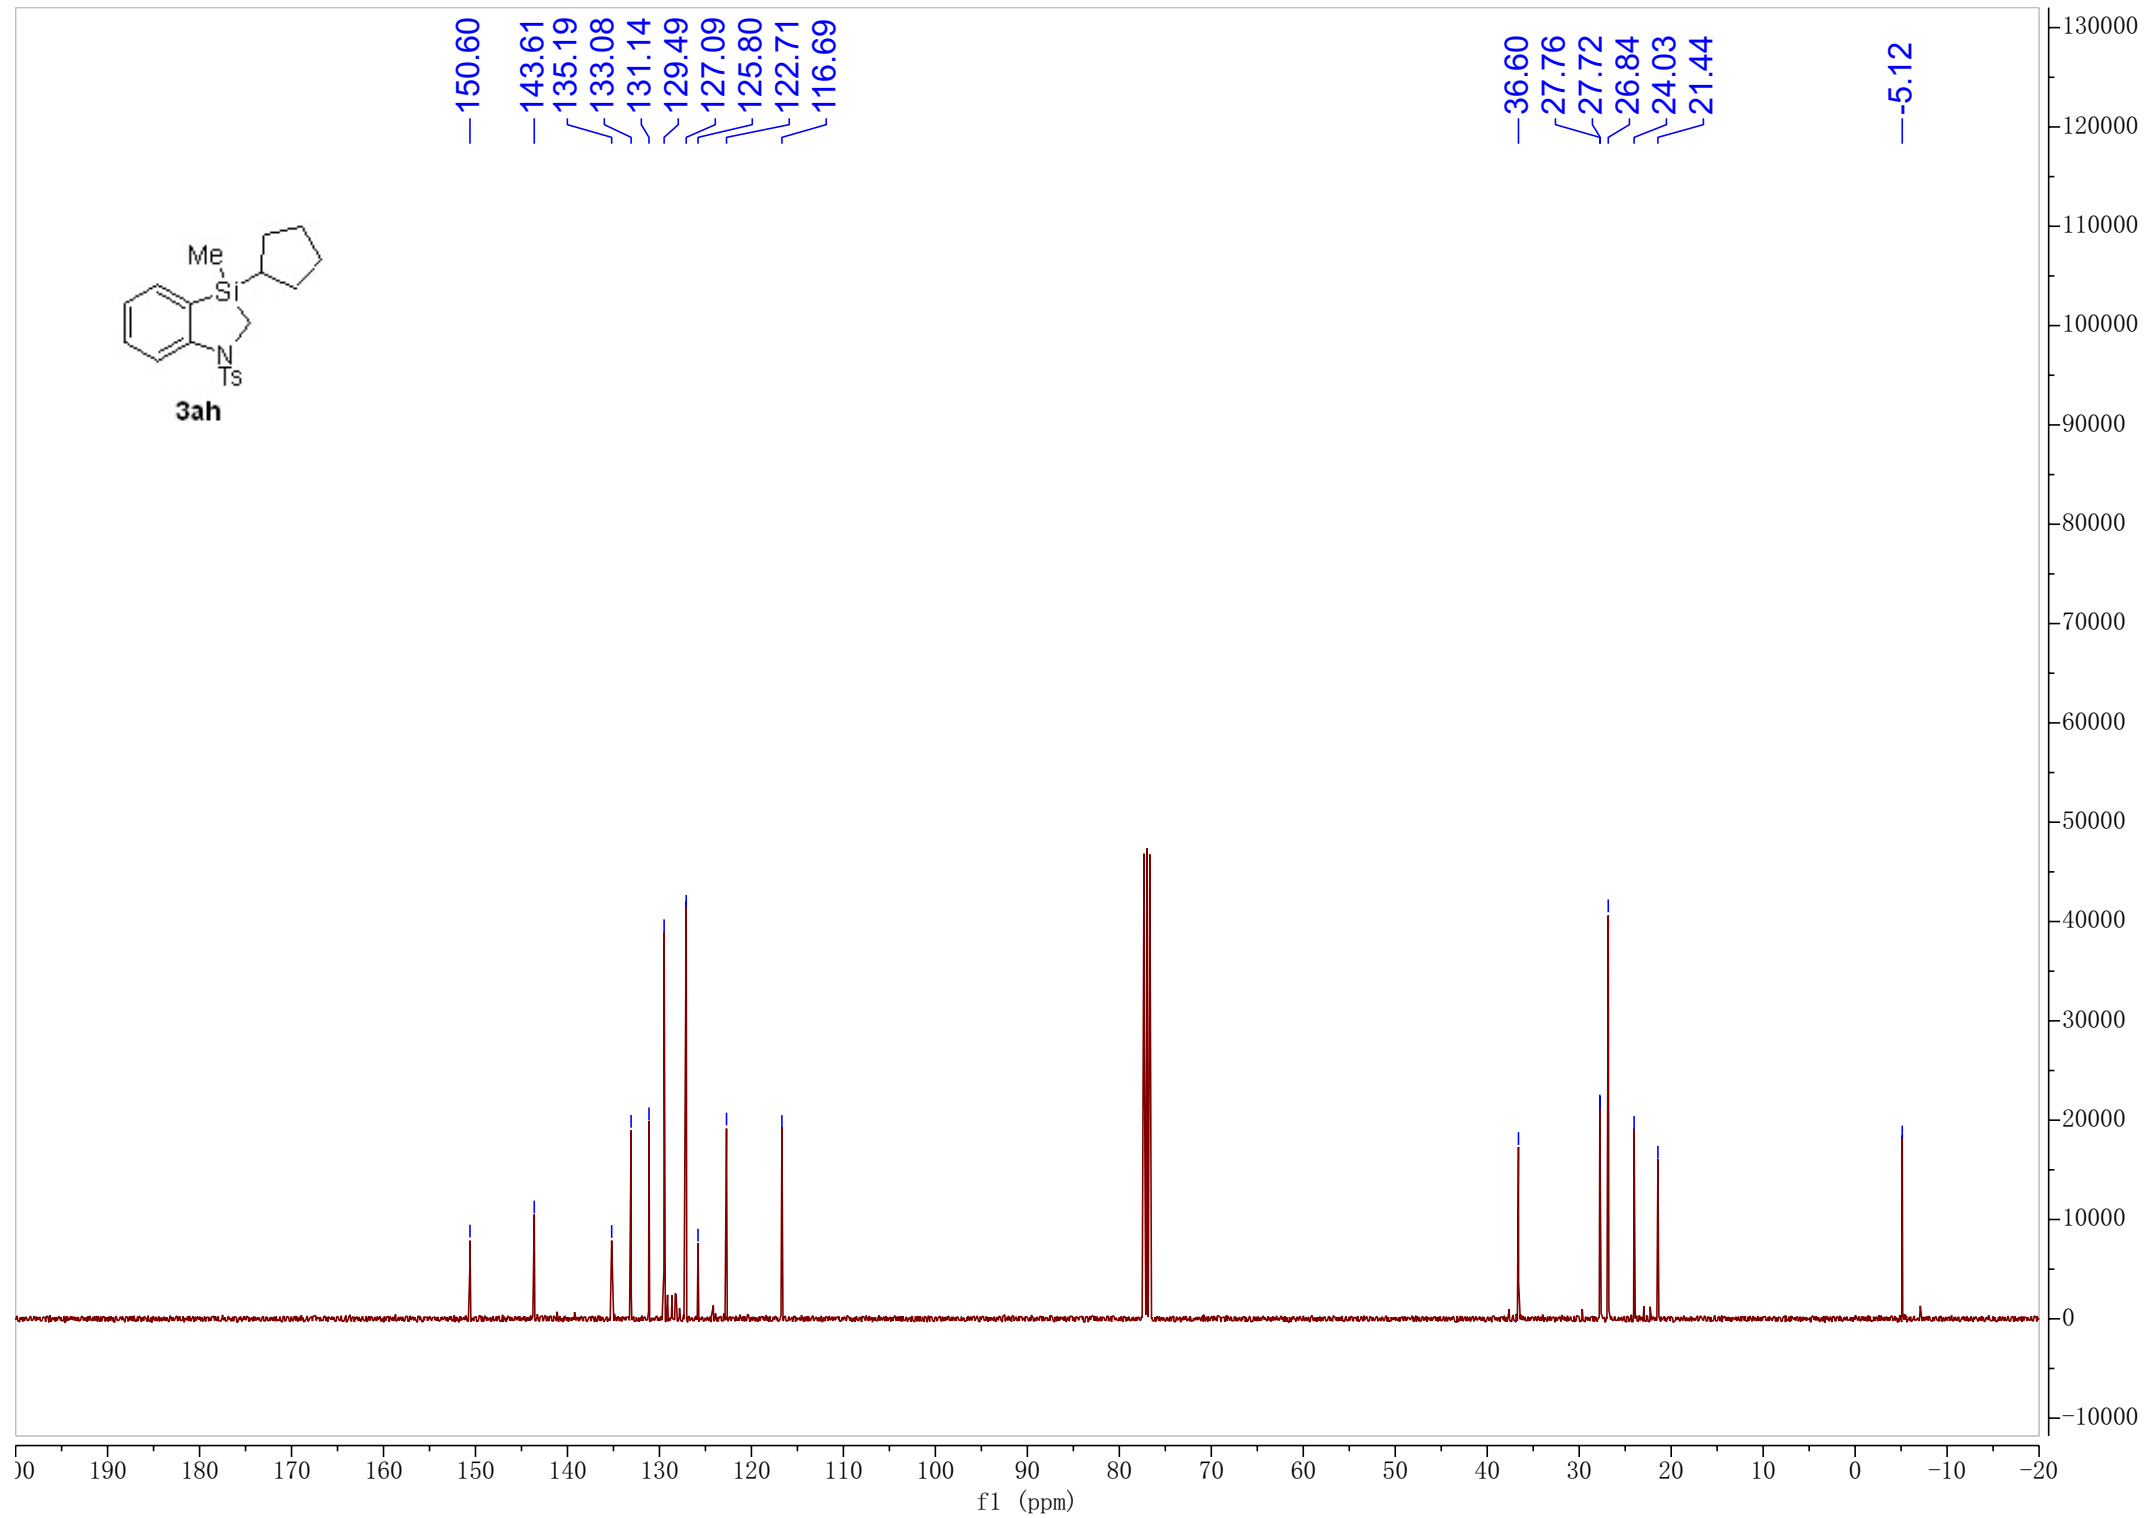

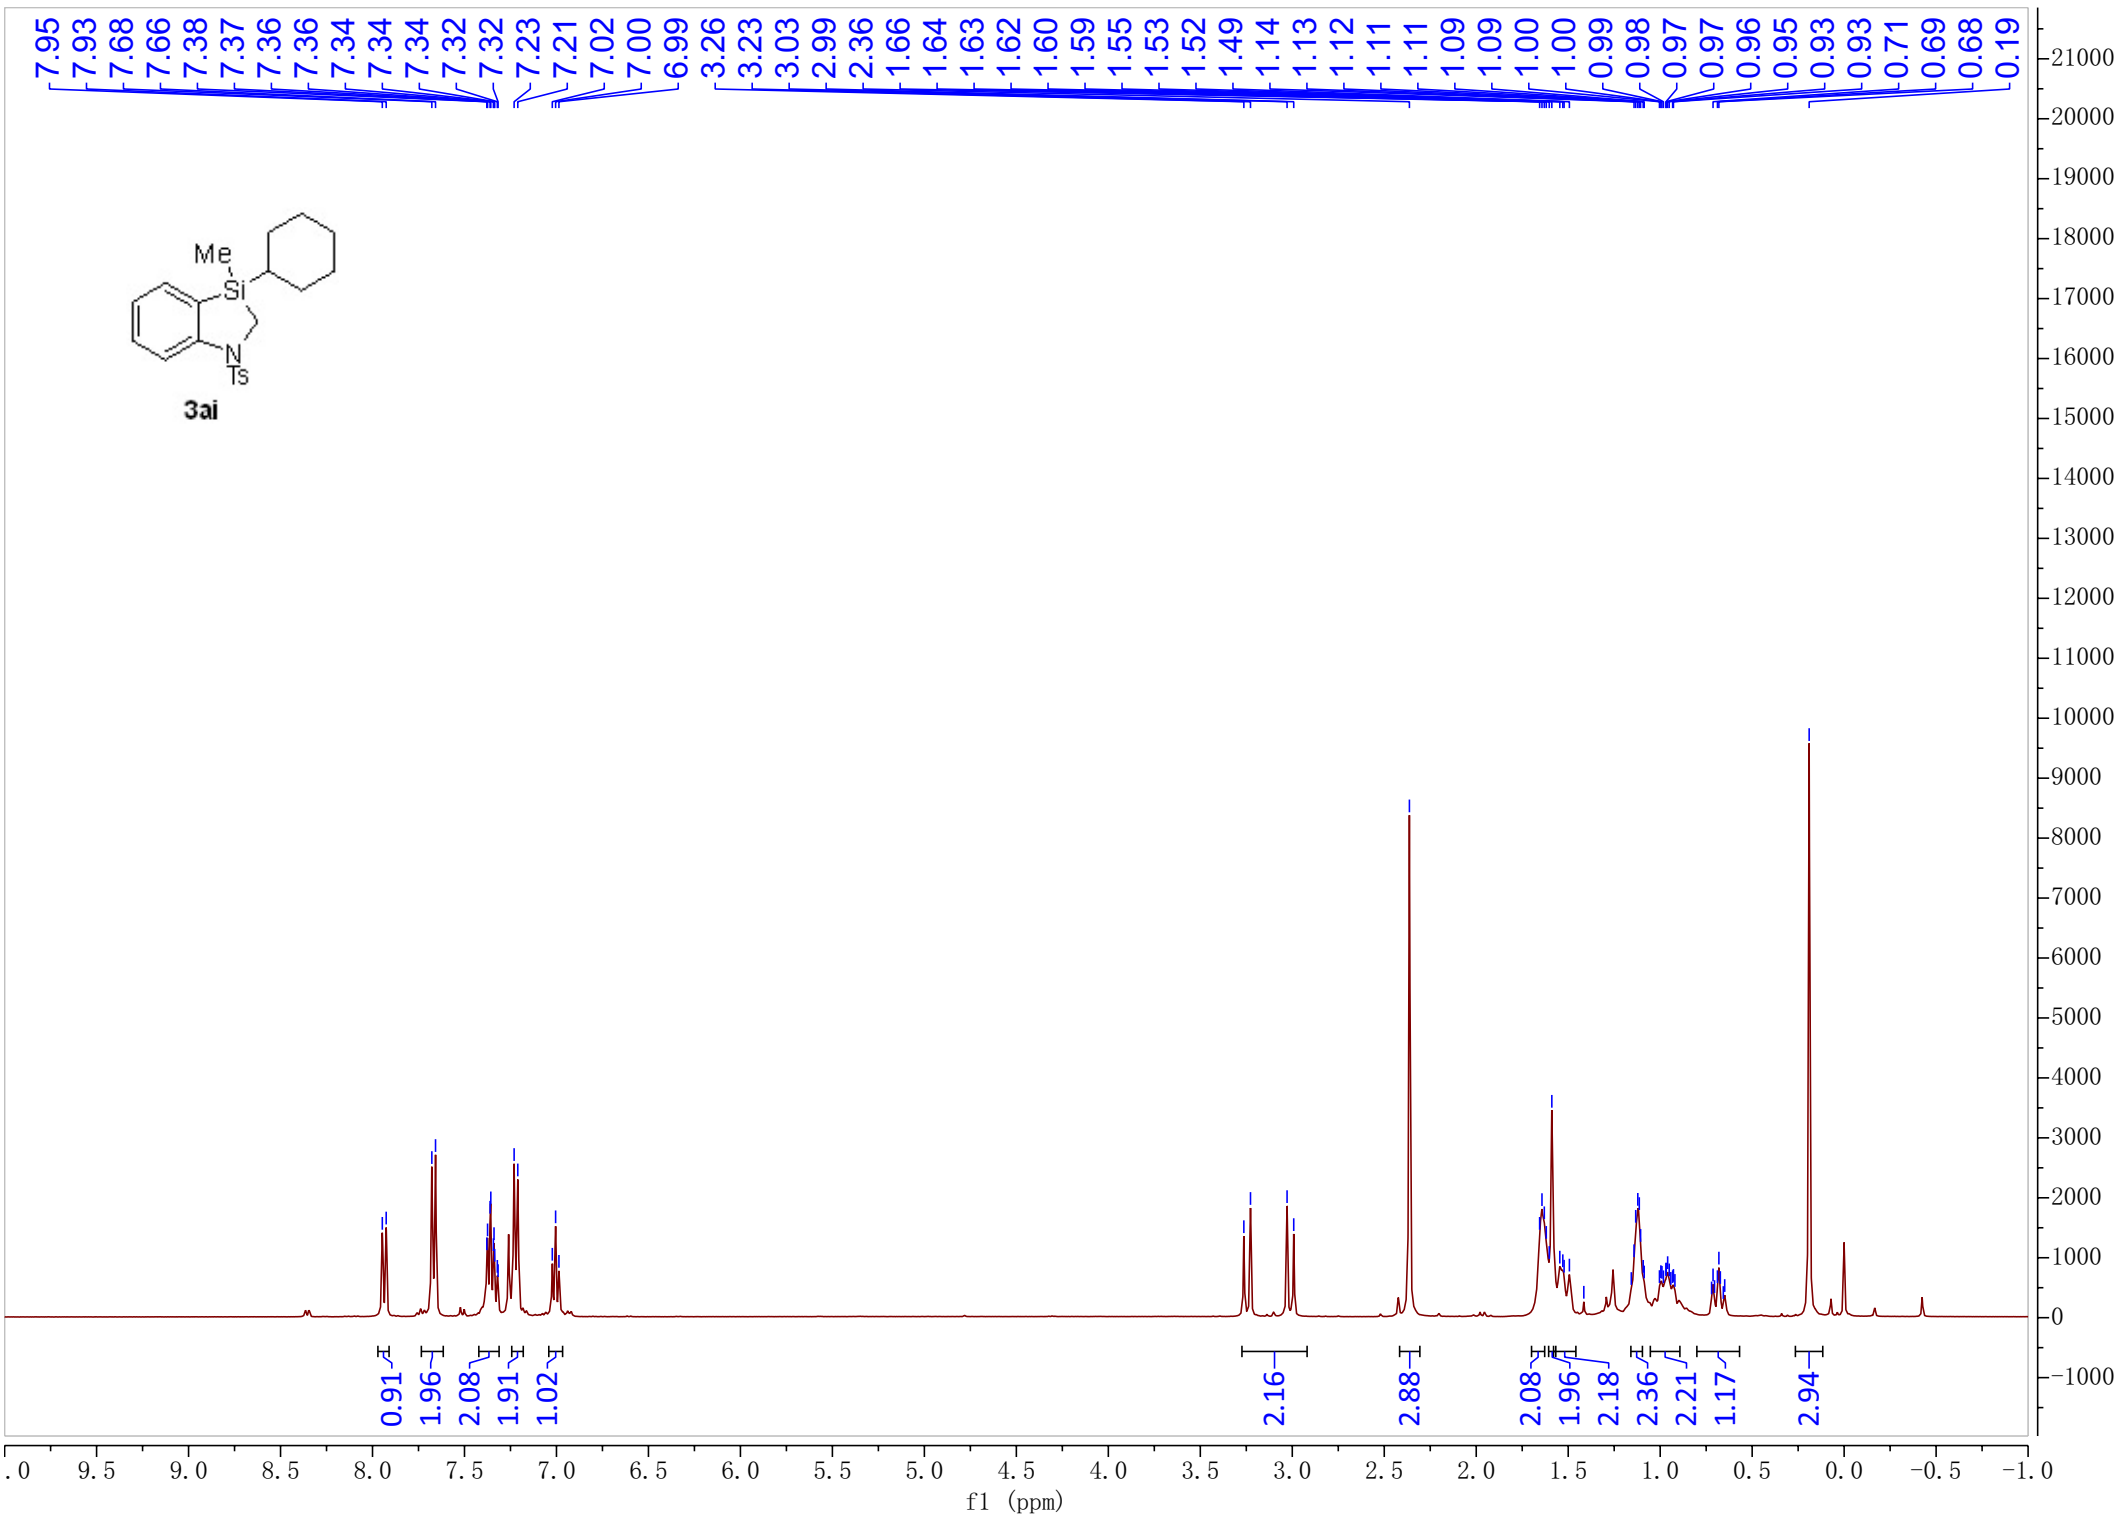

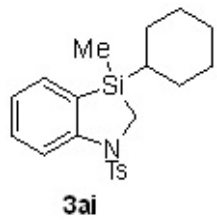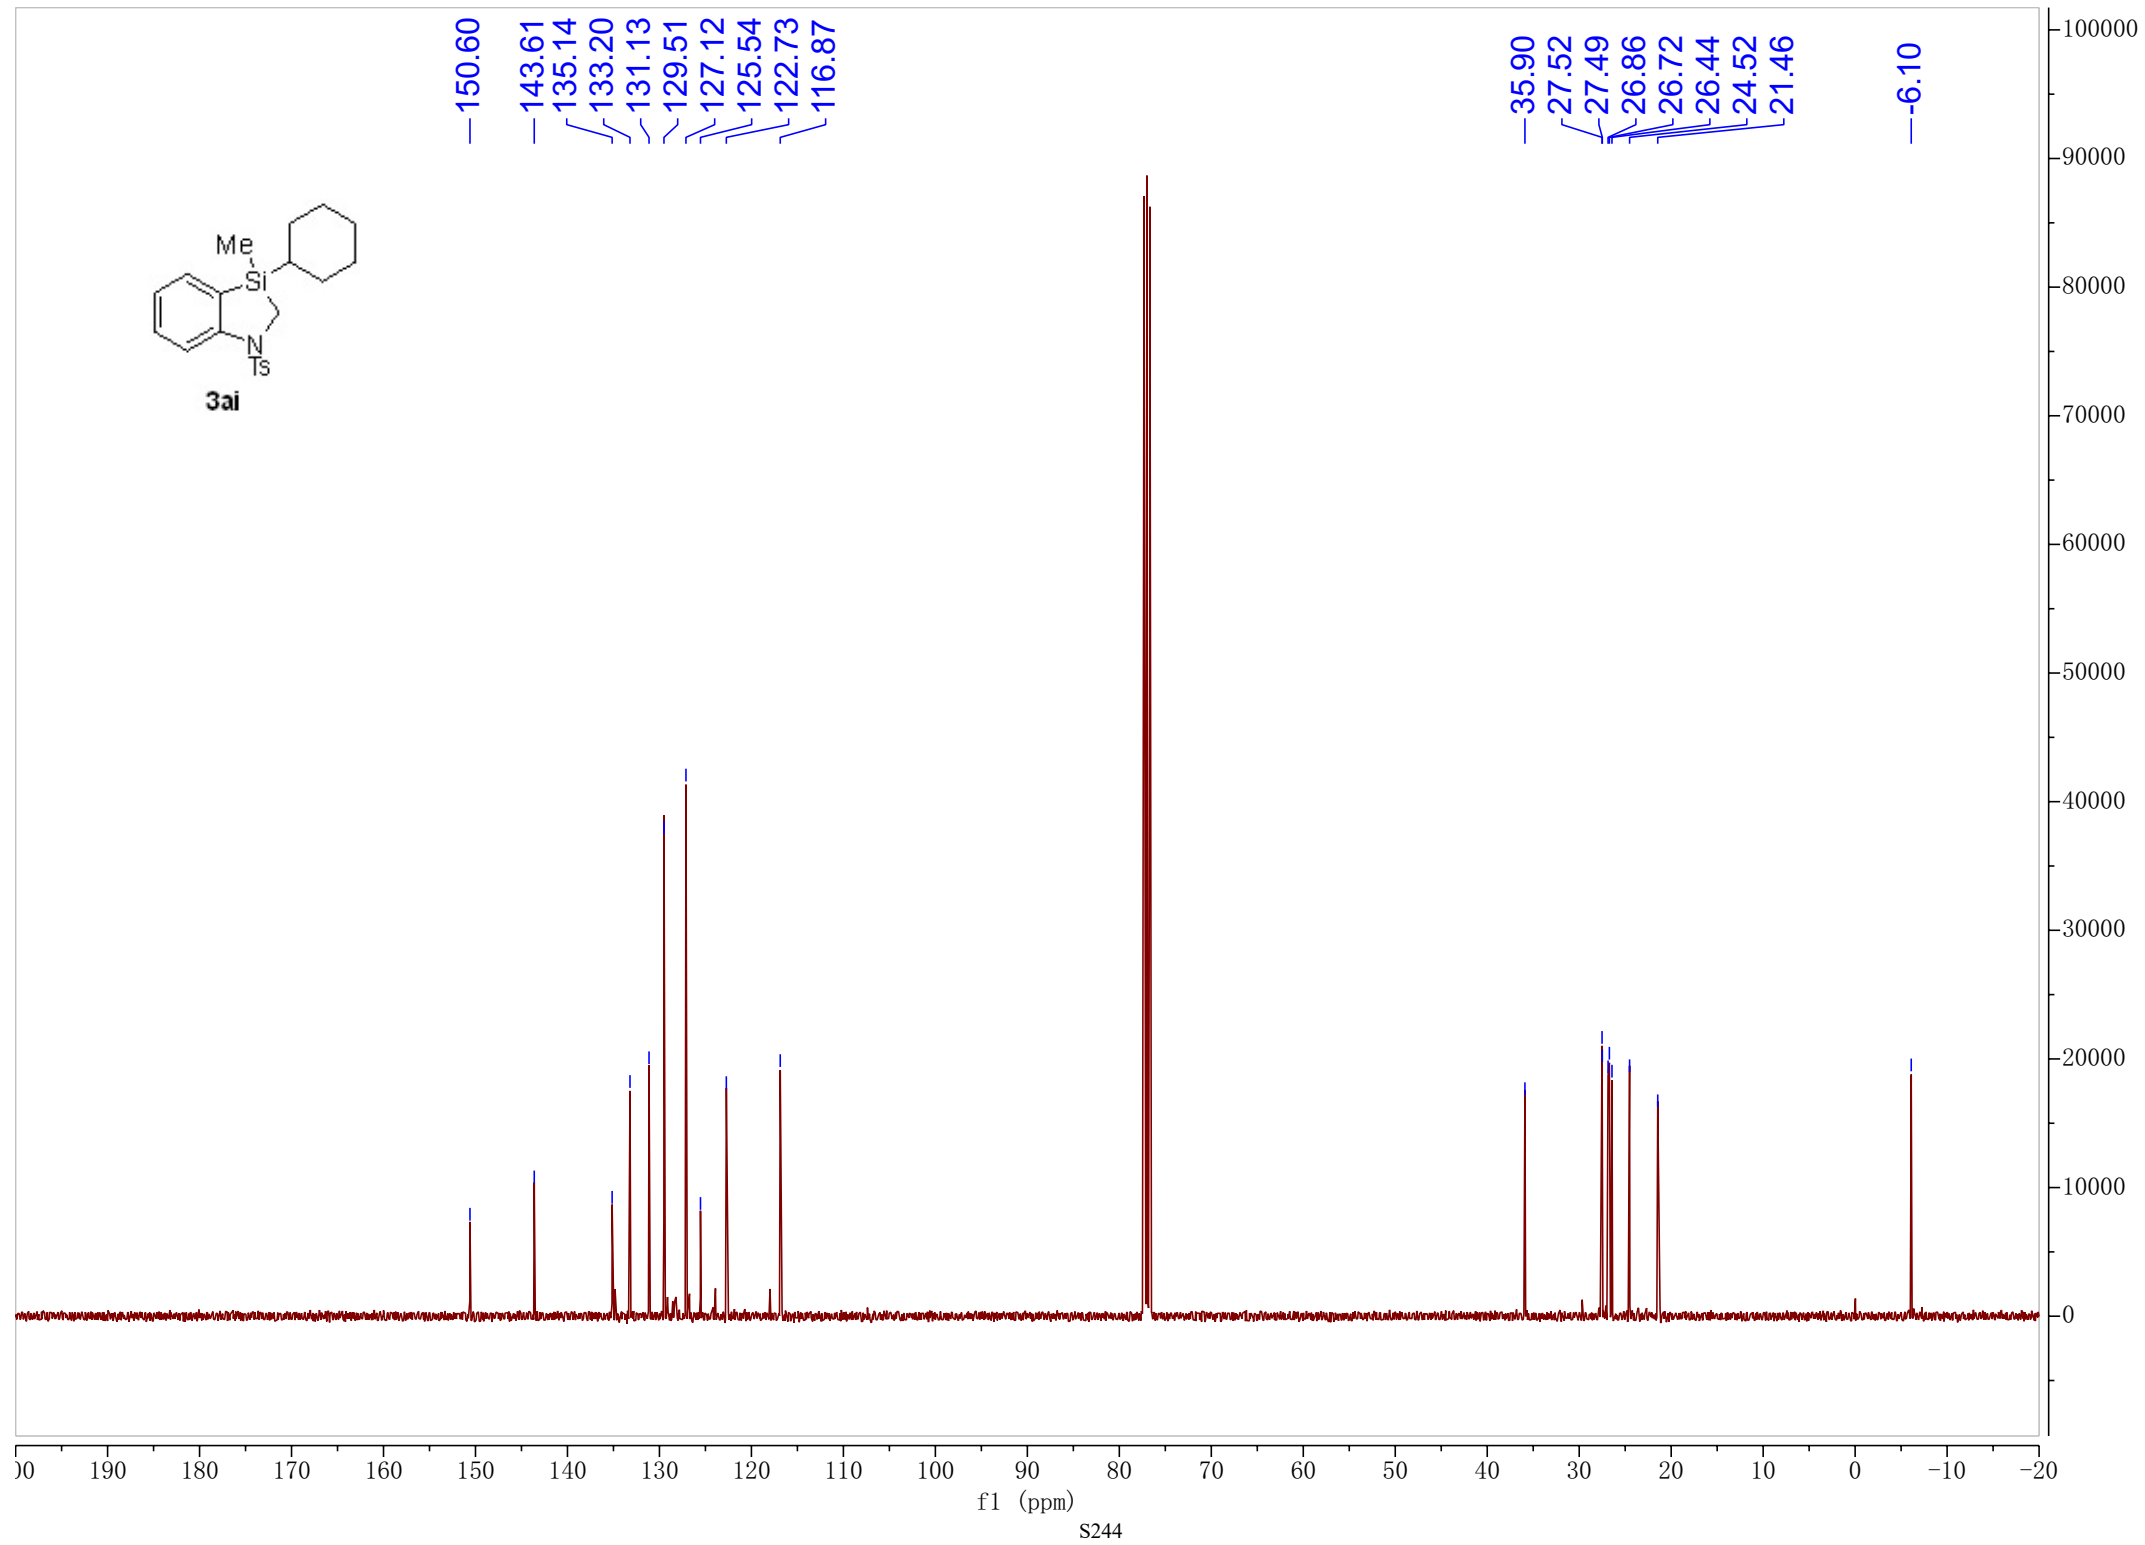

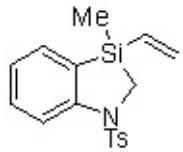

**3aj**

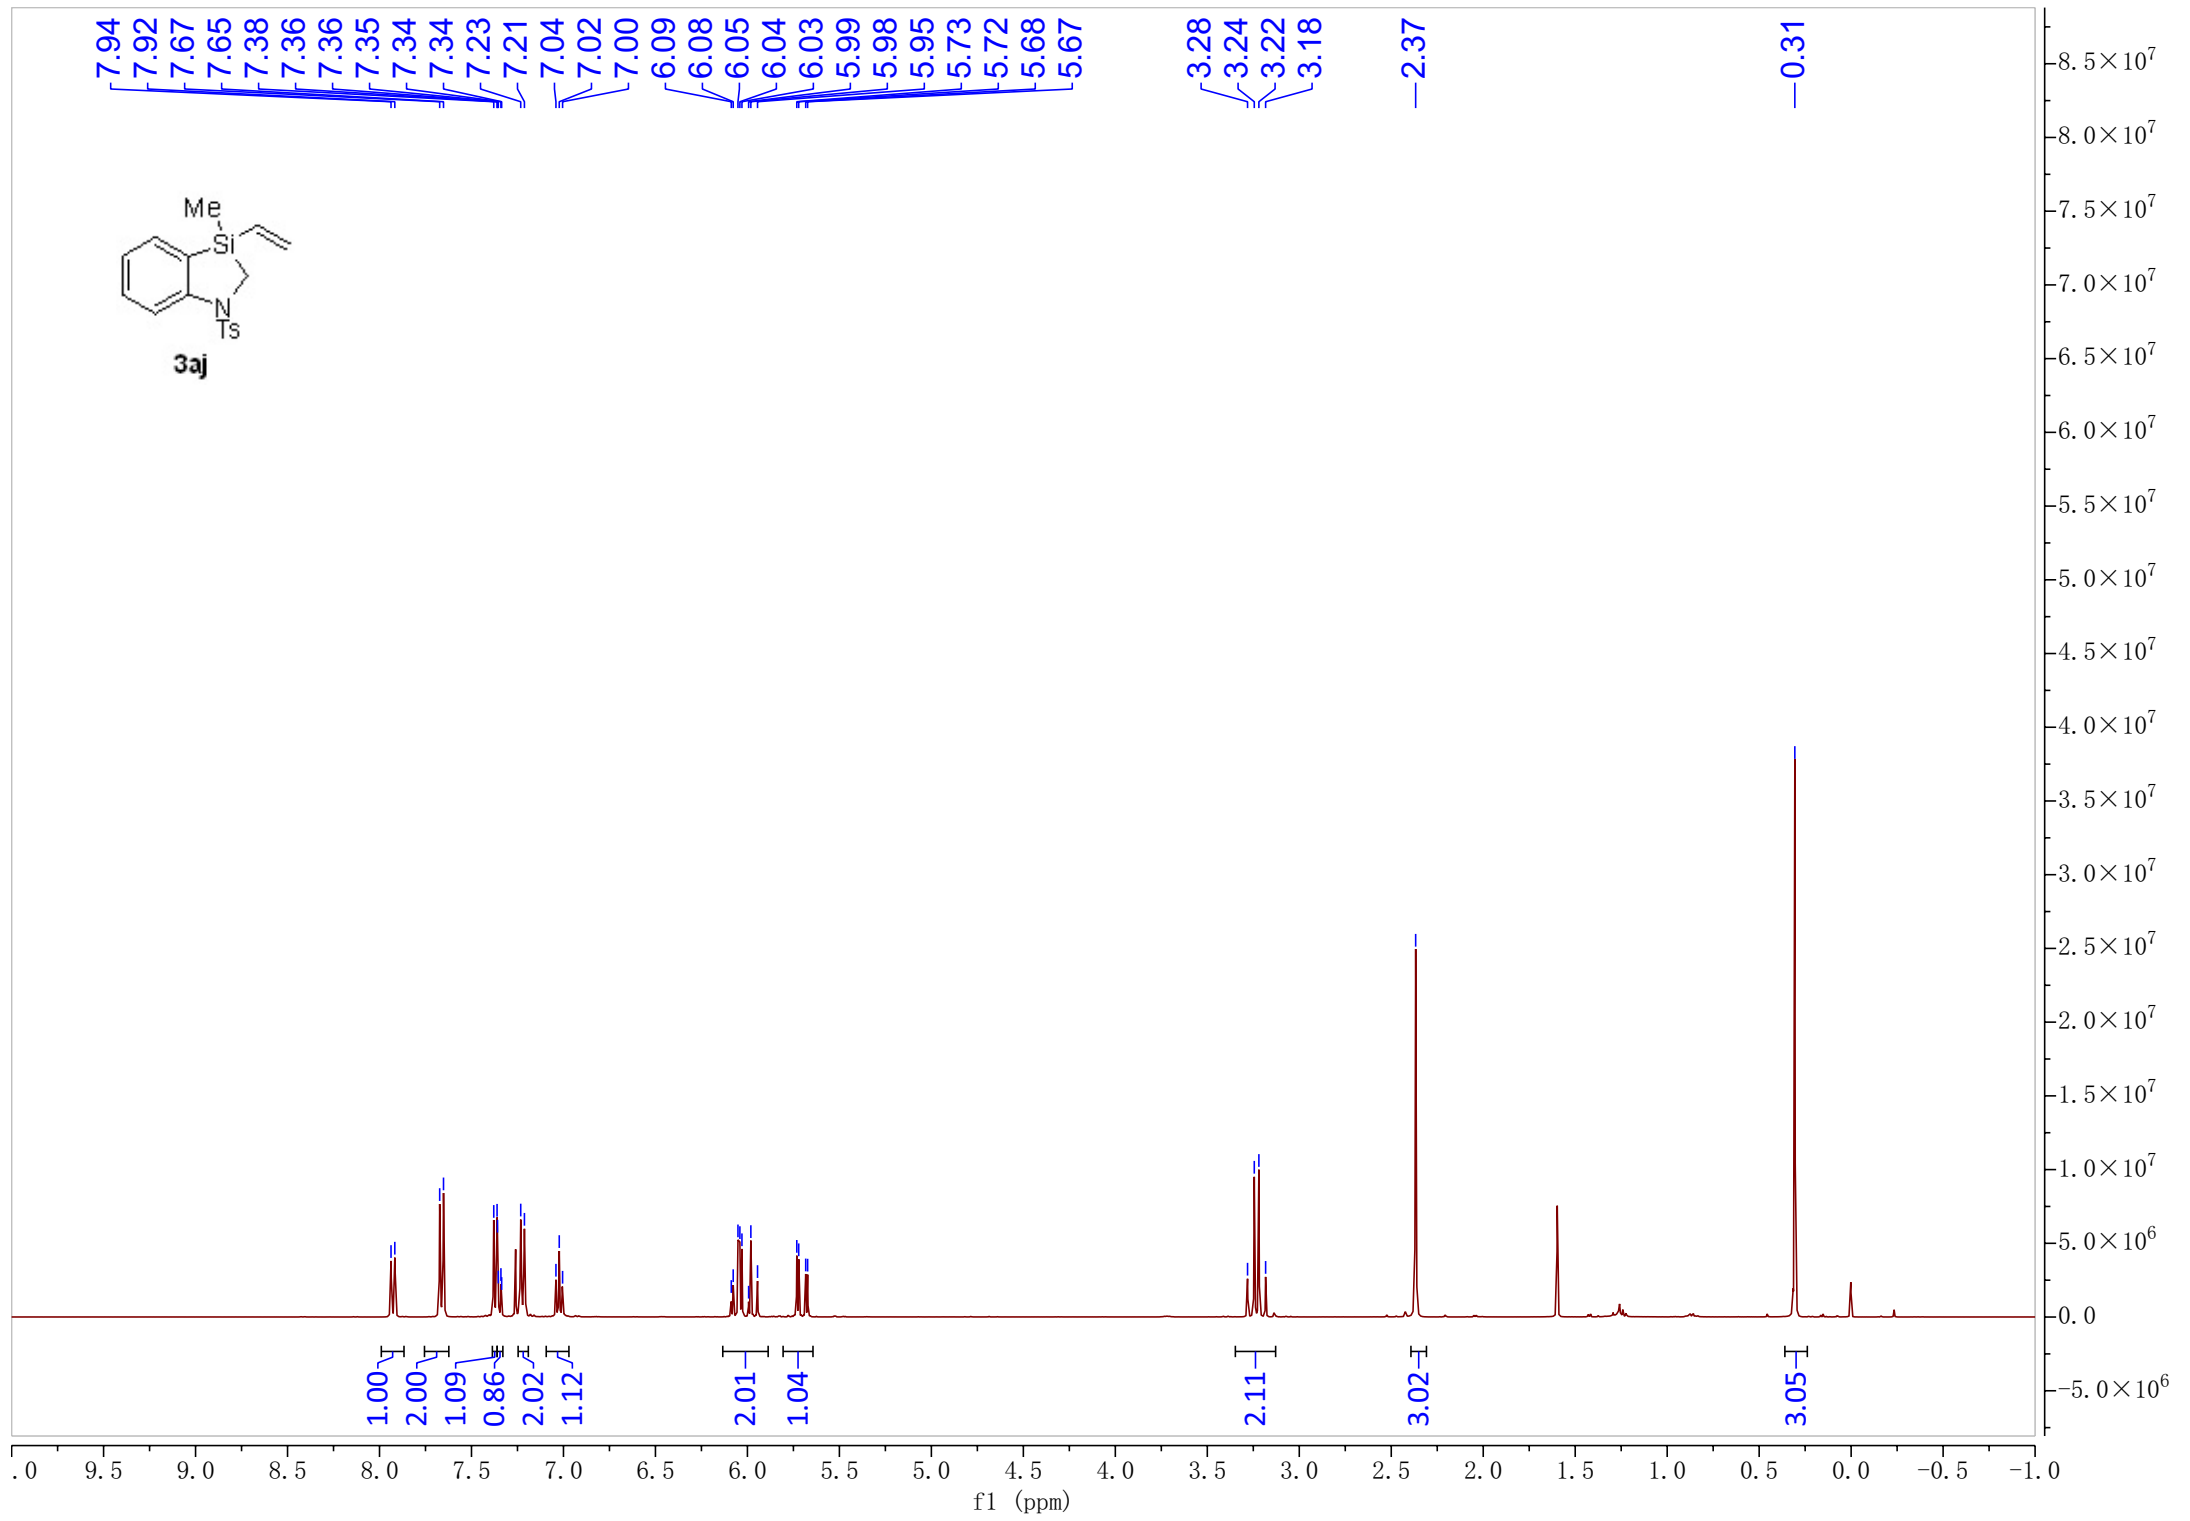

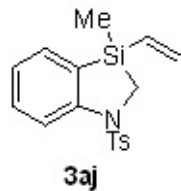

150.71  
143.65  
136.12  
135.19  
133.49  
133.16  
131.41  
129.53  
127.15  
125.16  
123.02  
117.12

—37.64

—21.45

—4.75

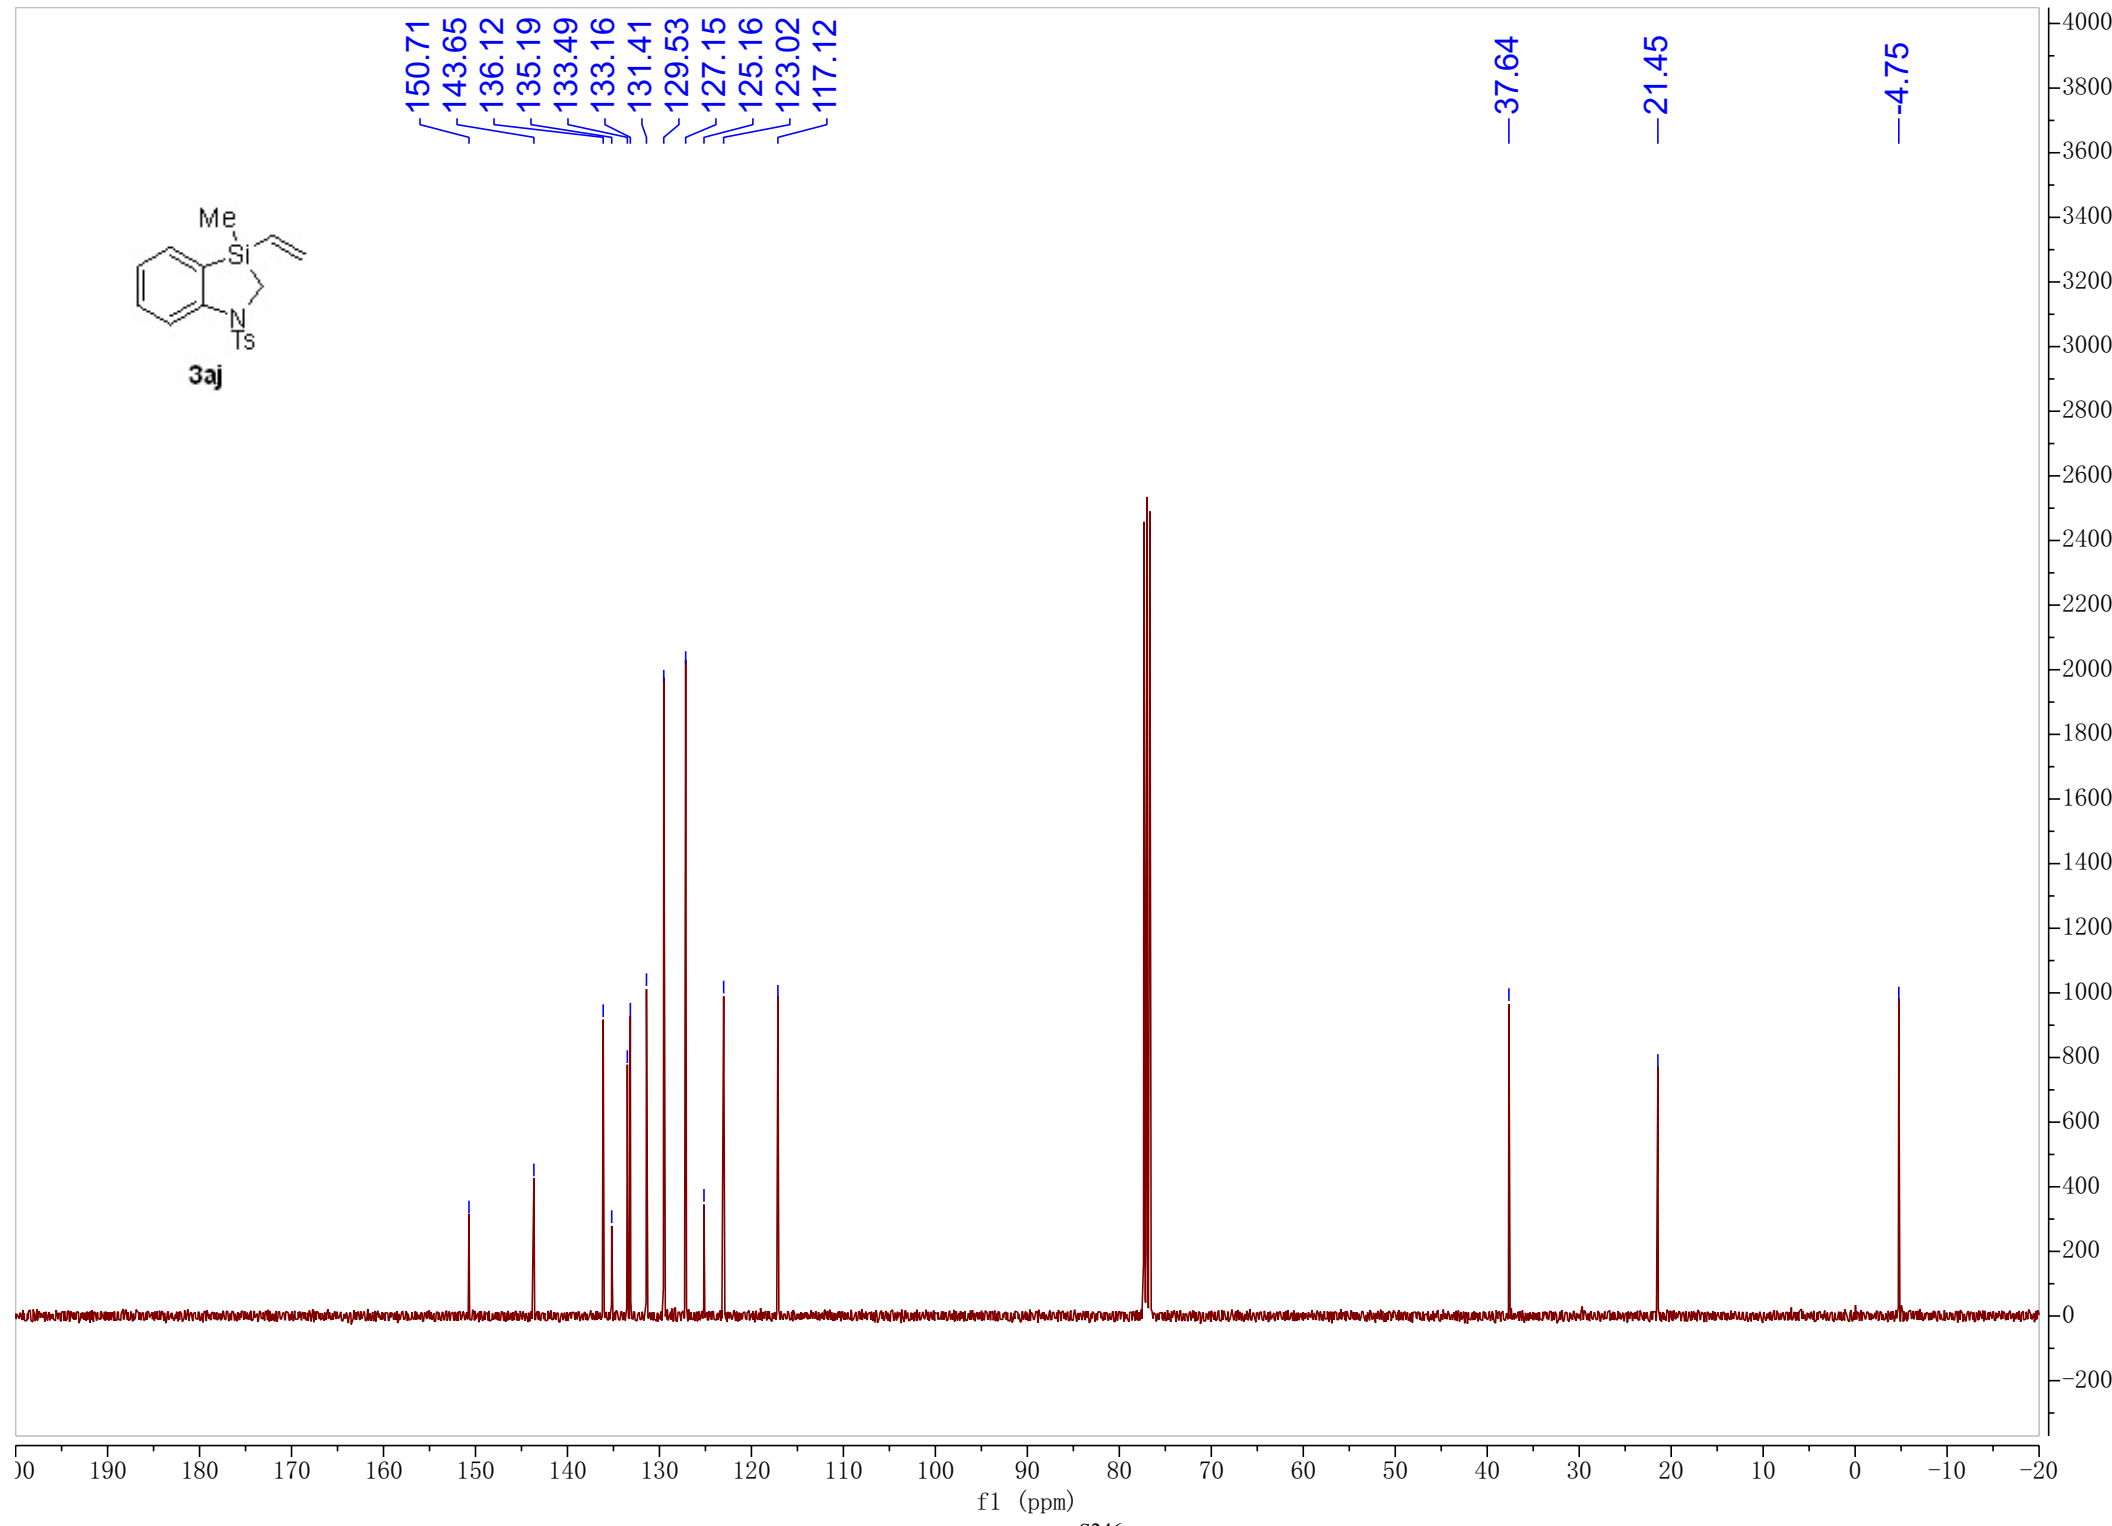

f1 (ppm)

S246

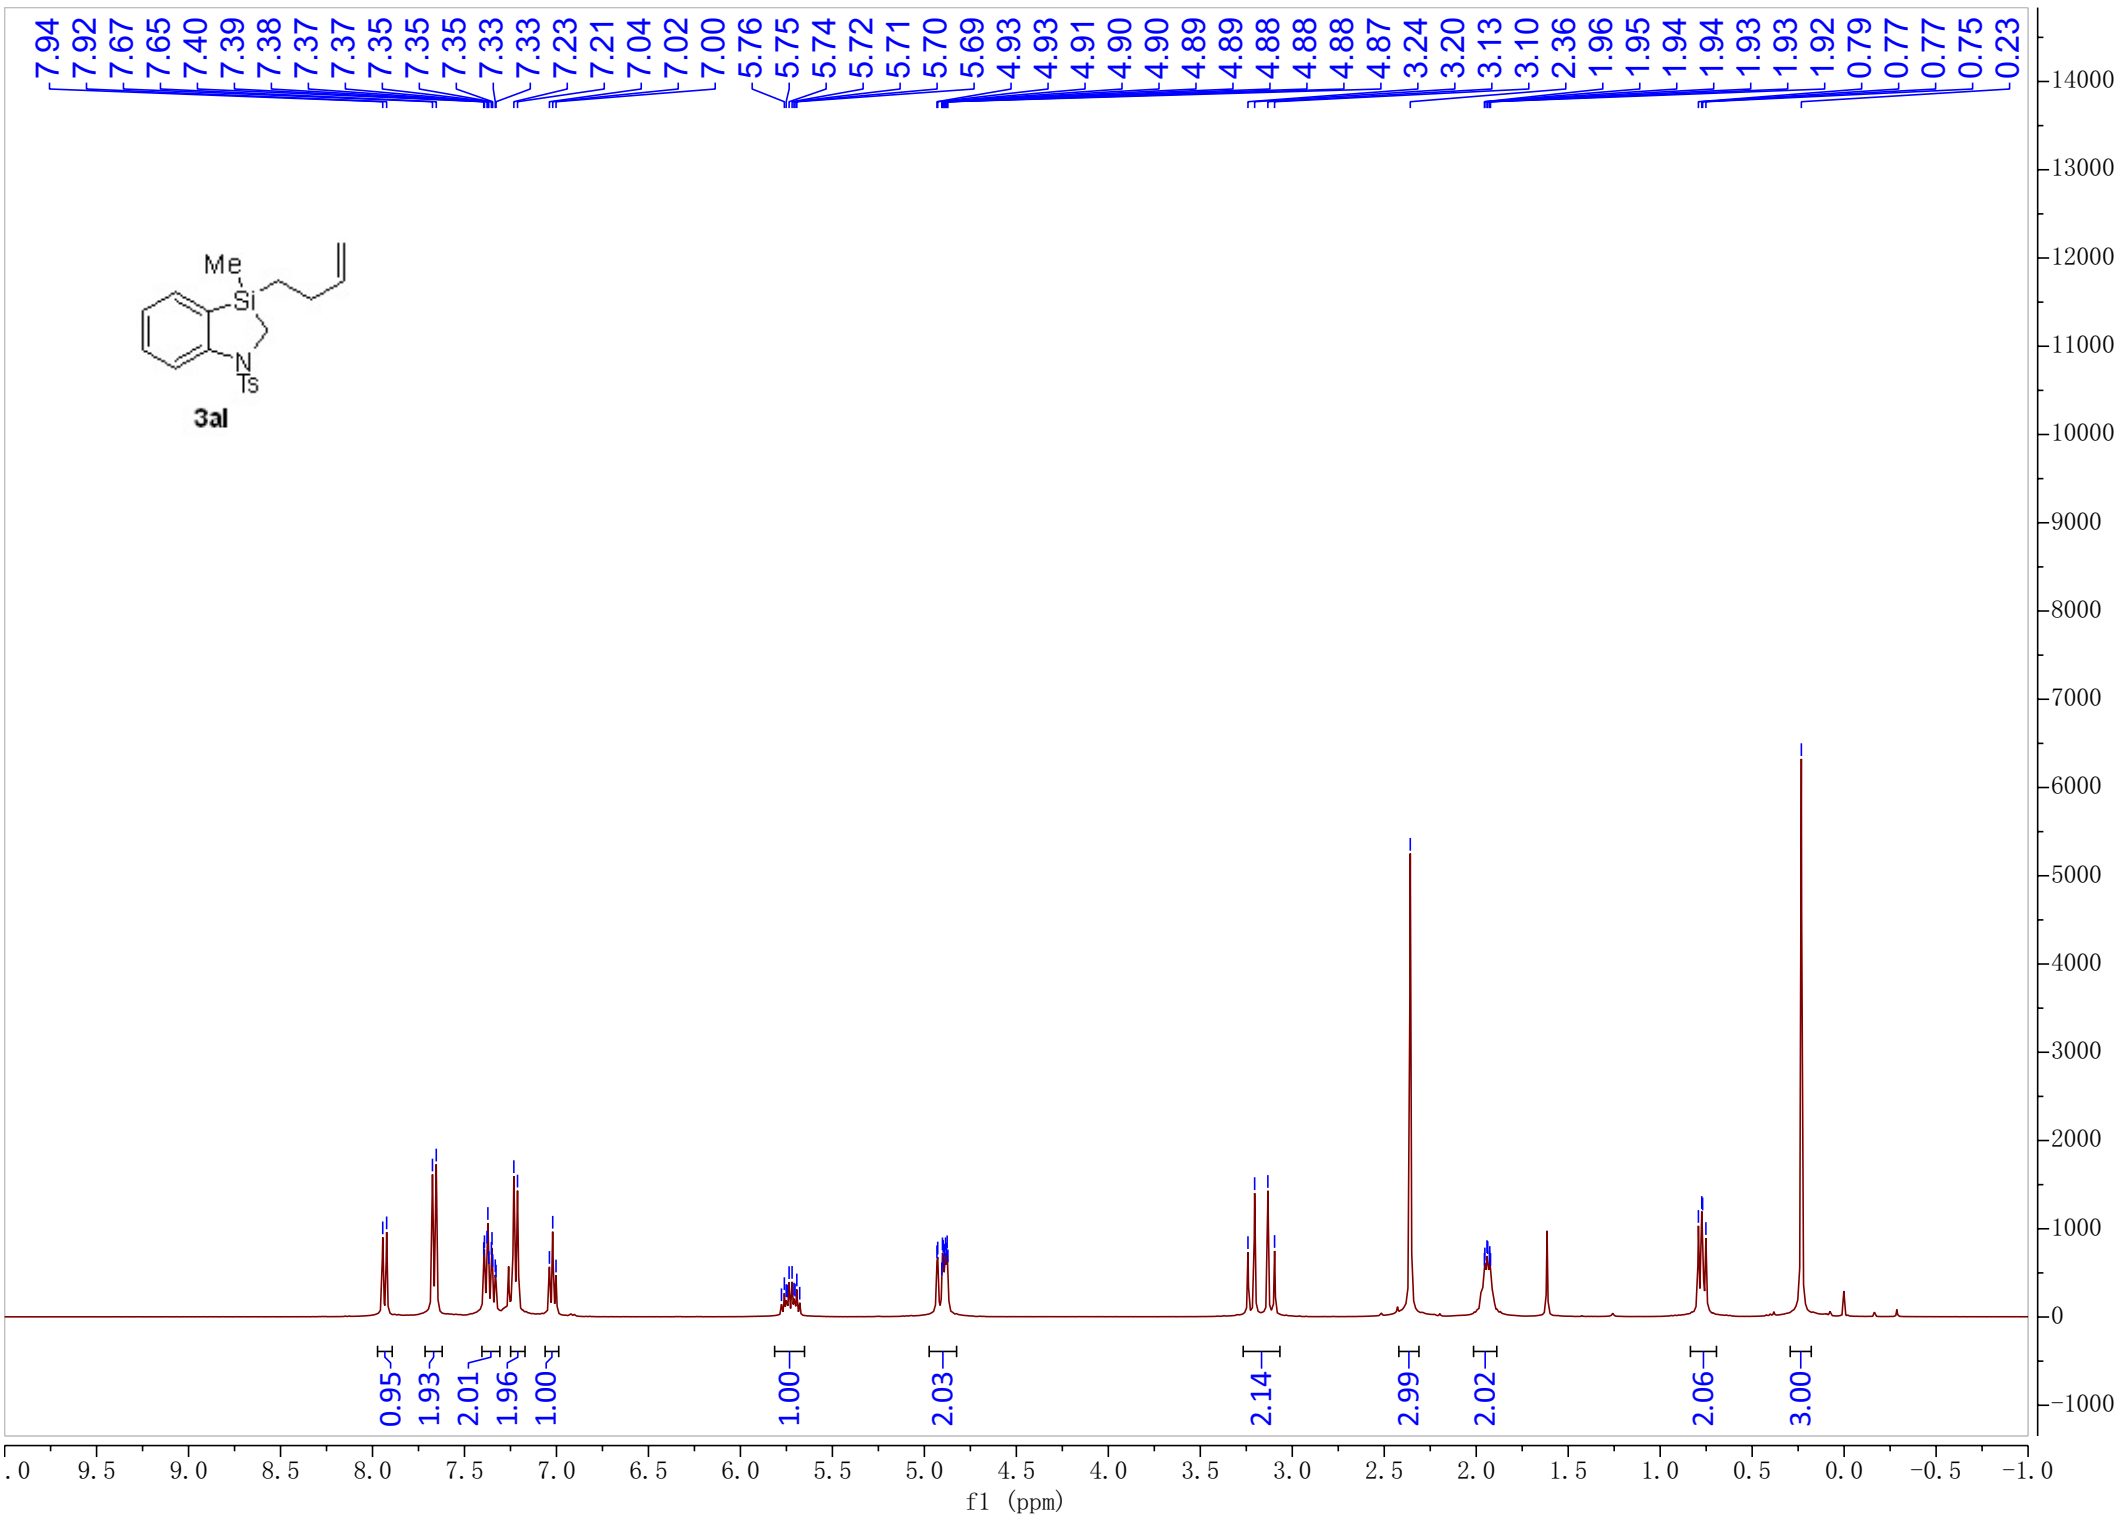

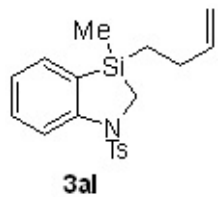

150.43  
143.69  
140.00  
135.05  
133.01  
131.24  
129.53  
127.08  
125.92  
122.89  
117.00  
113.75

-37.24  
-27.31  
-21.46  
-13.37  
-3.78

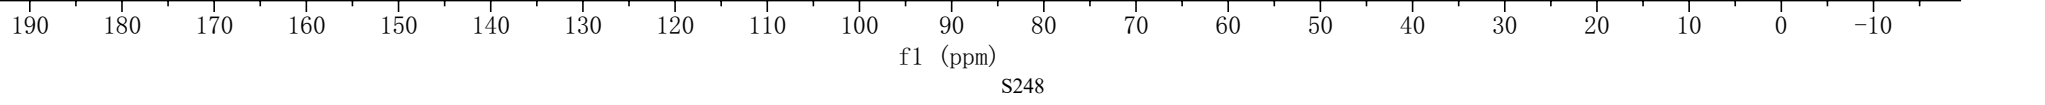



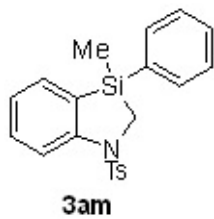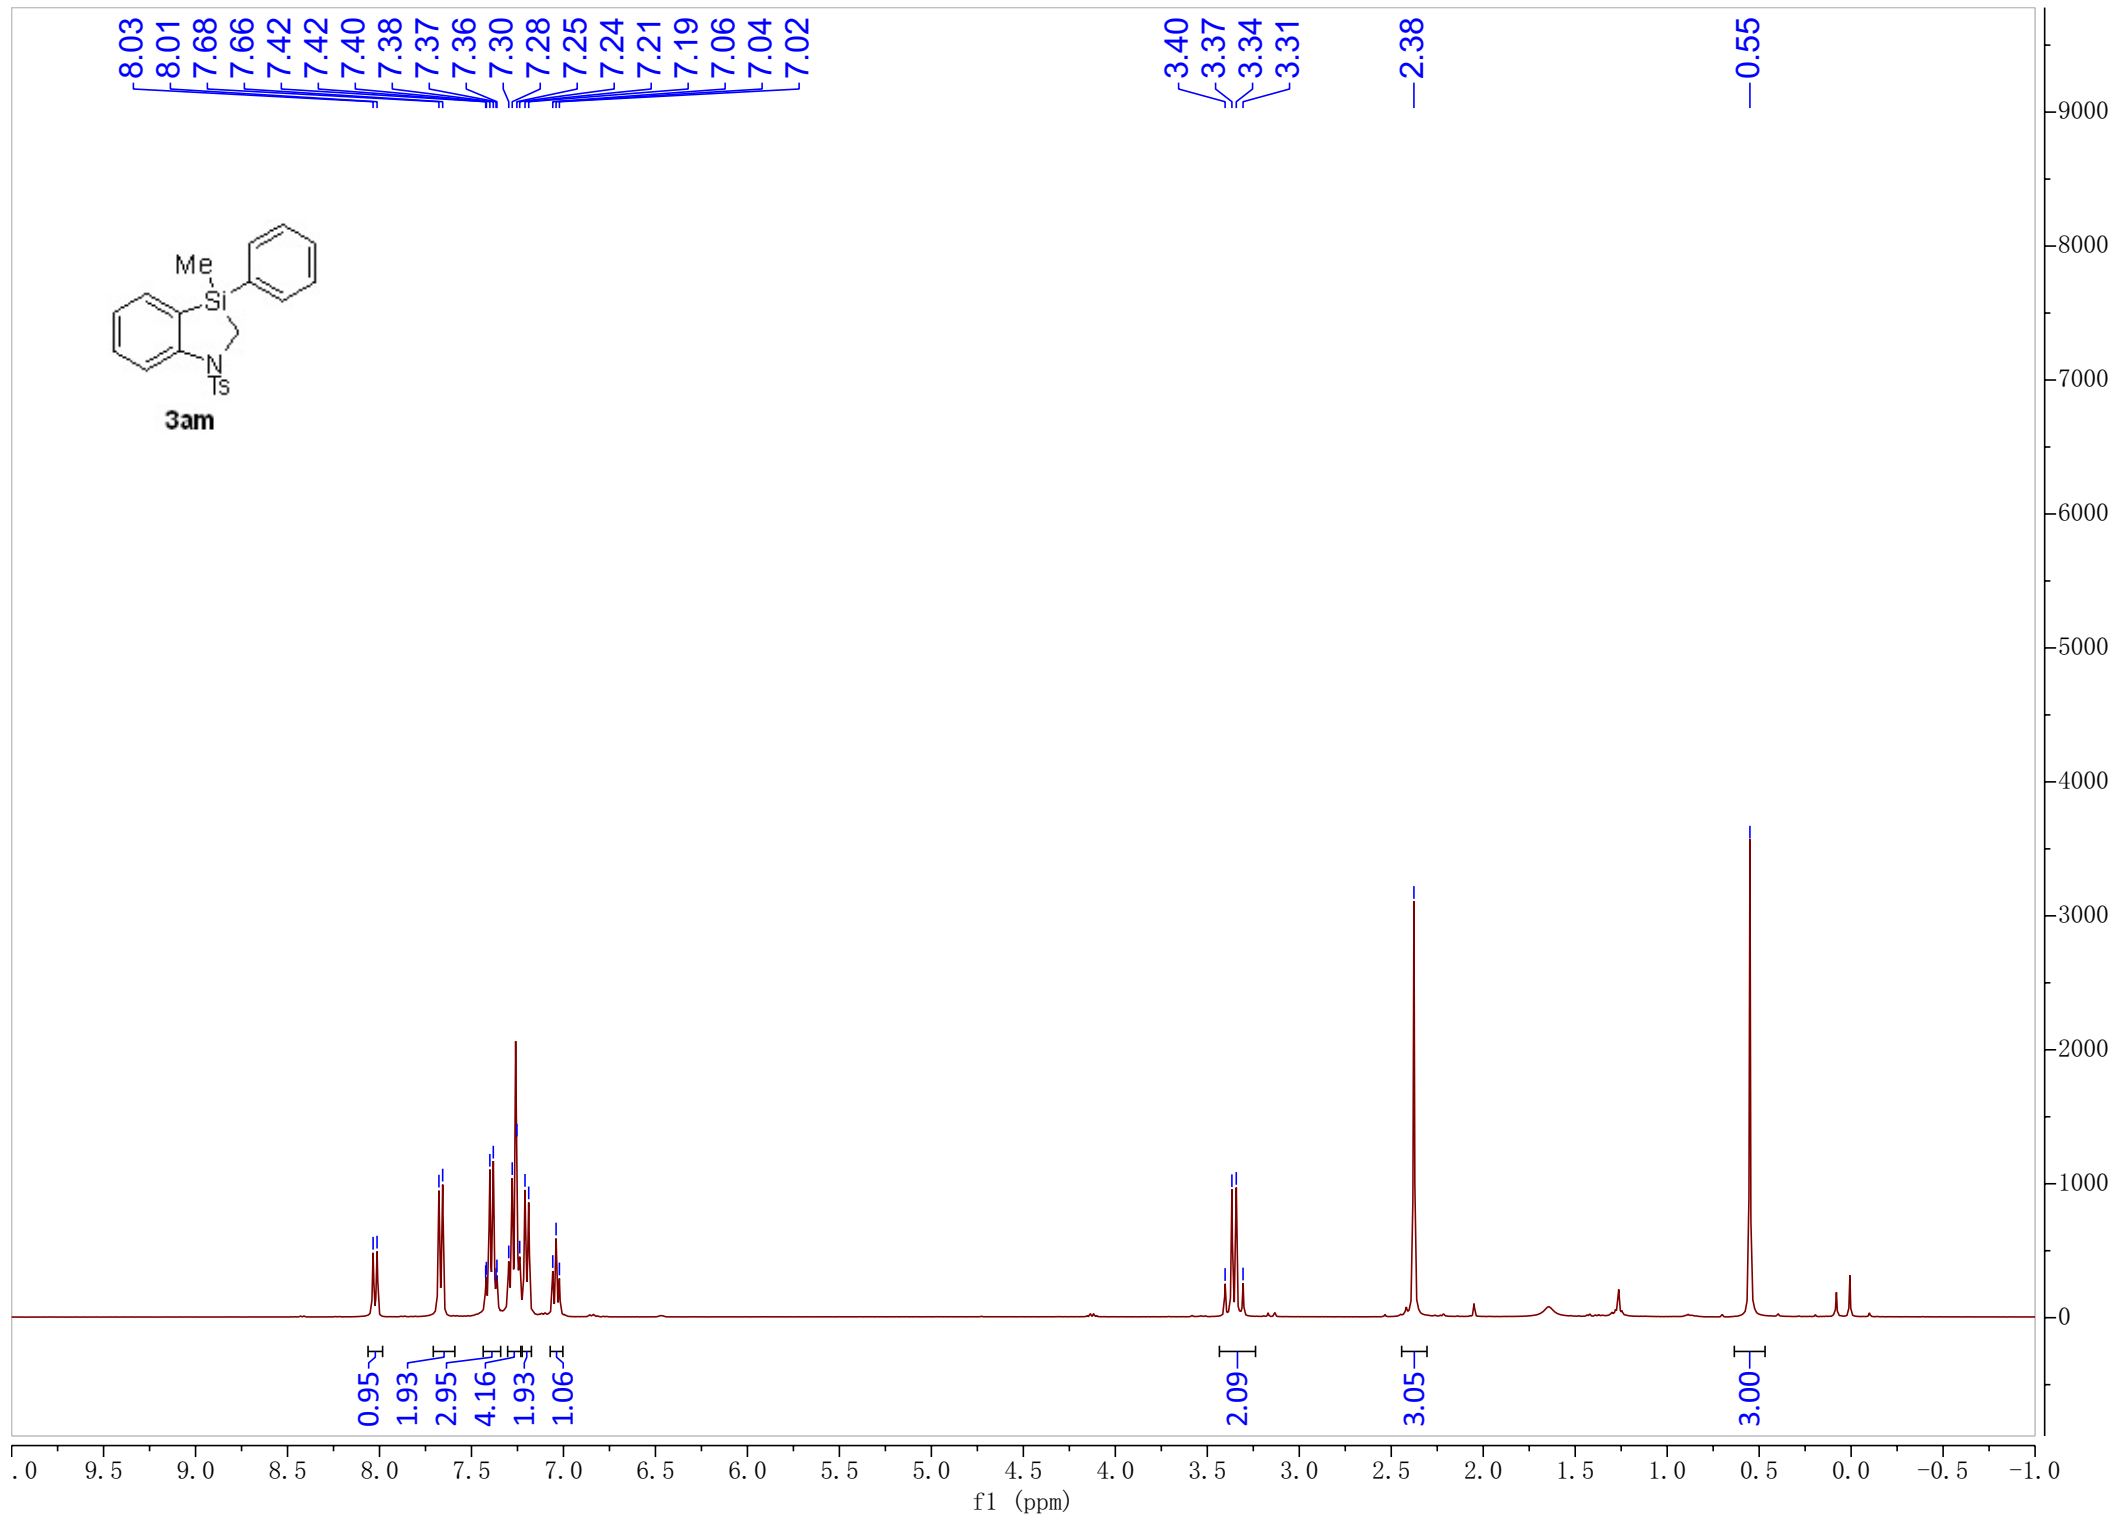

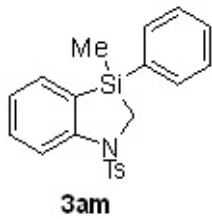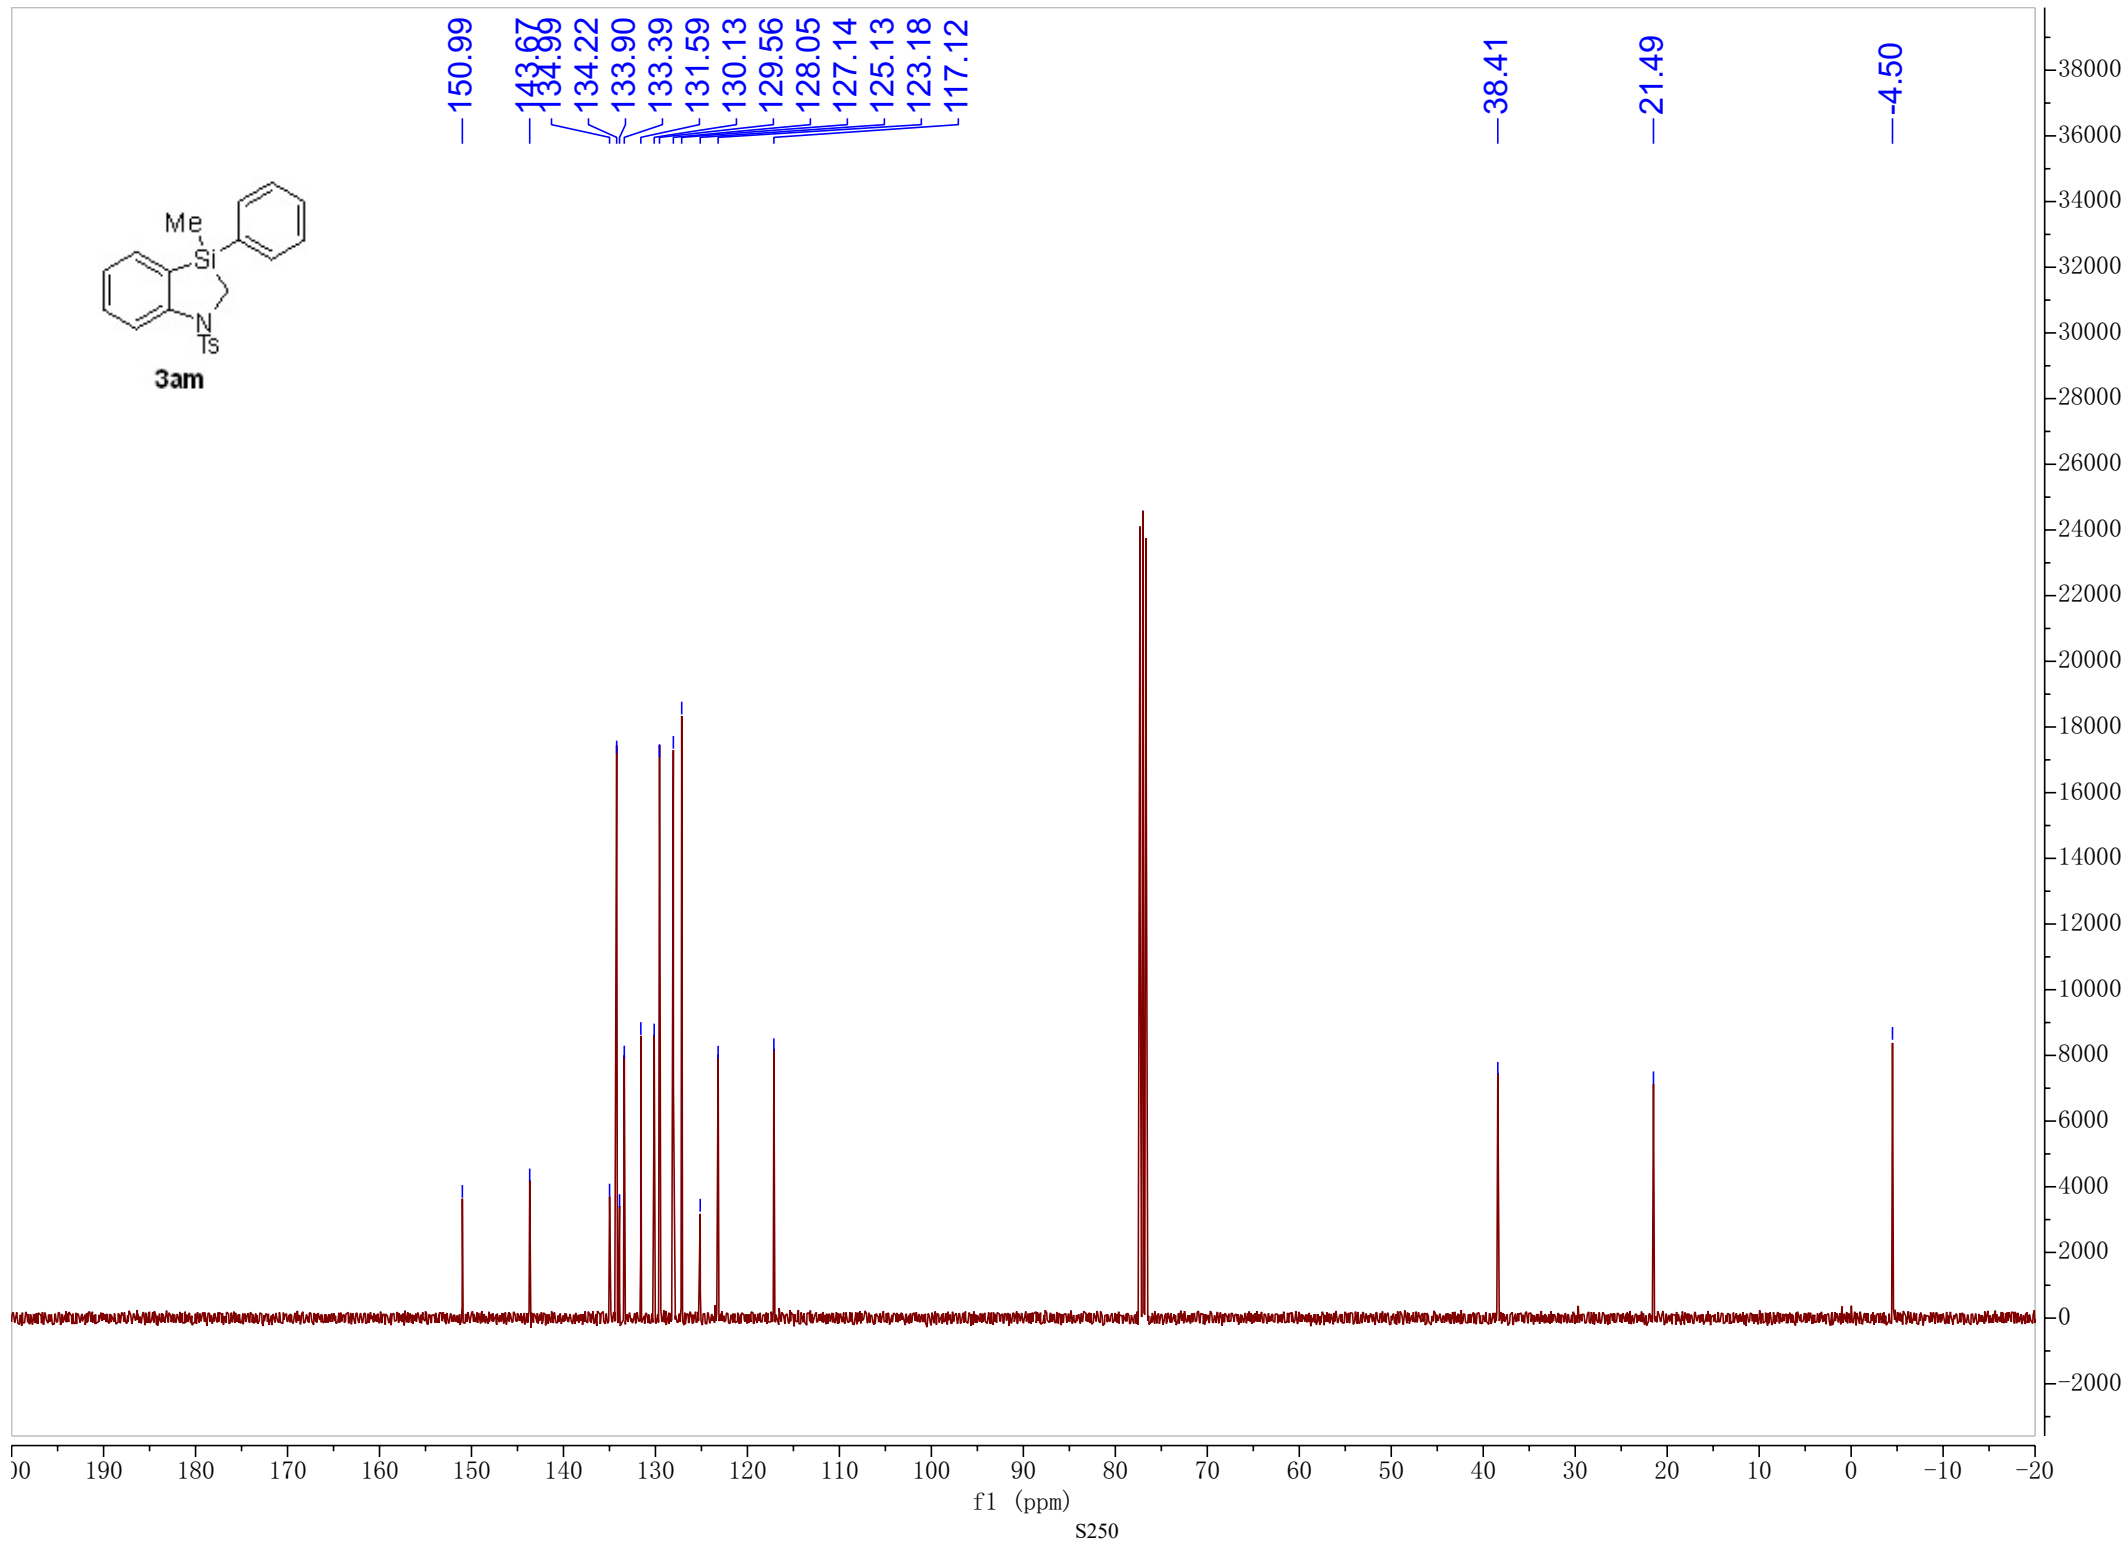

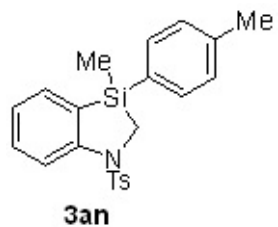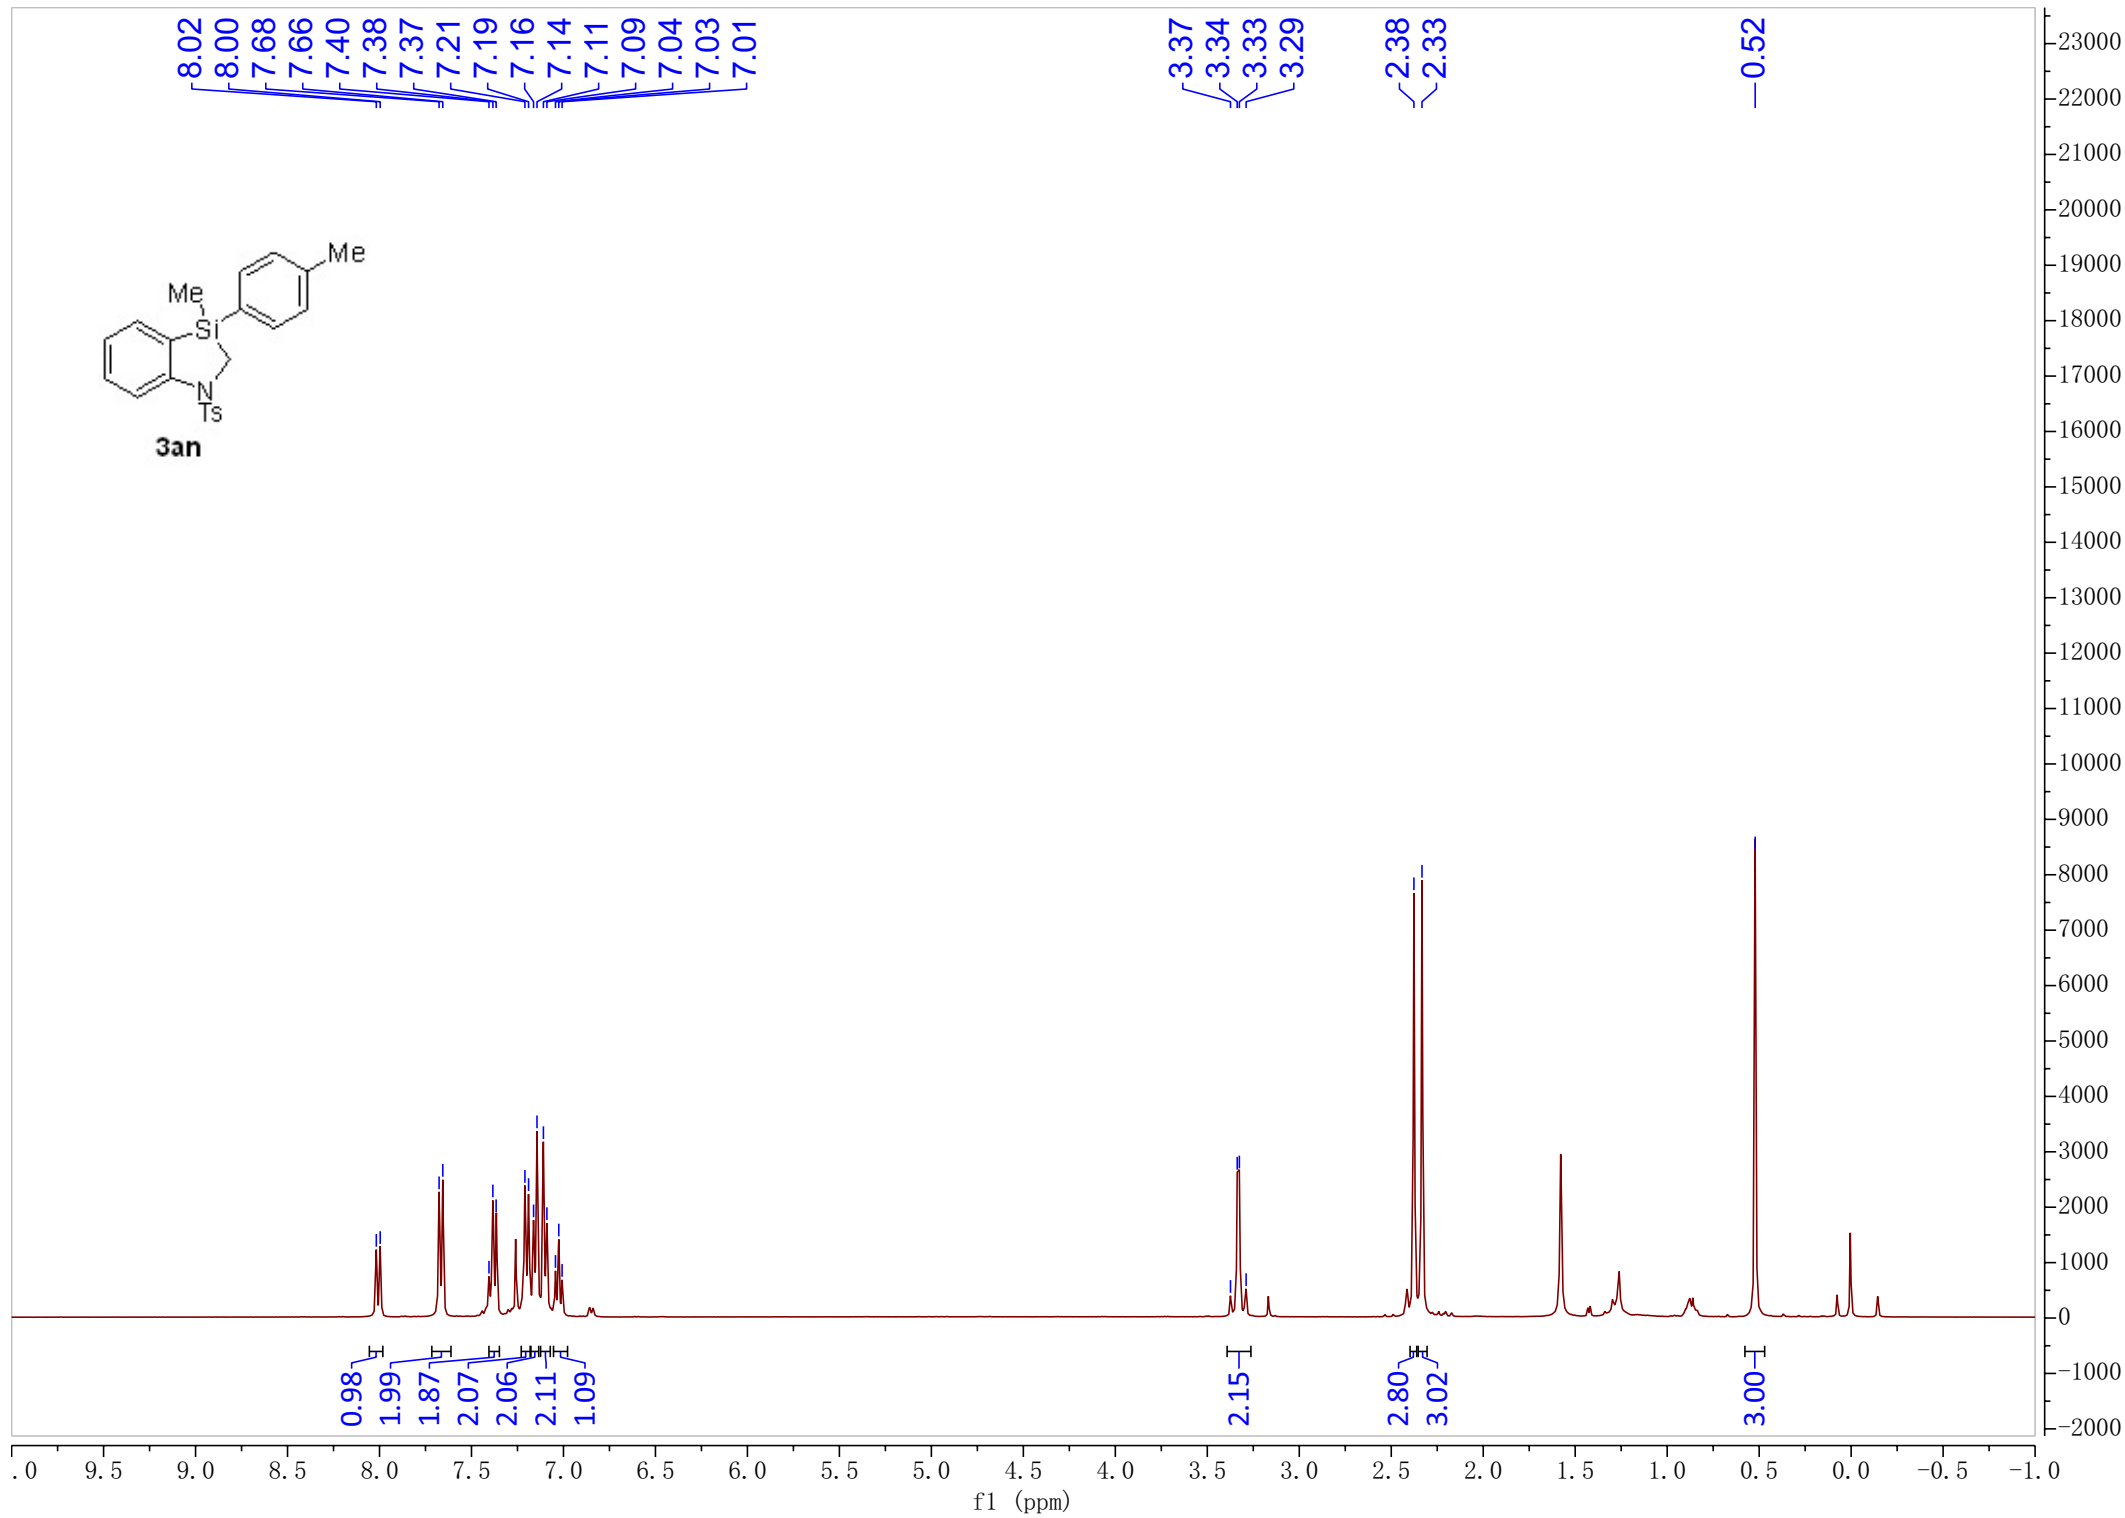

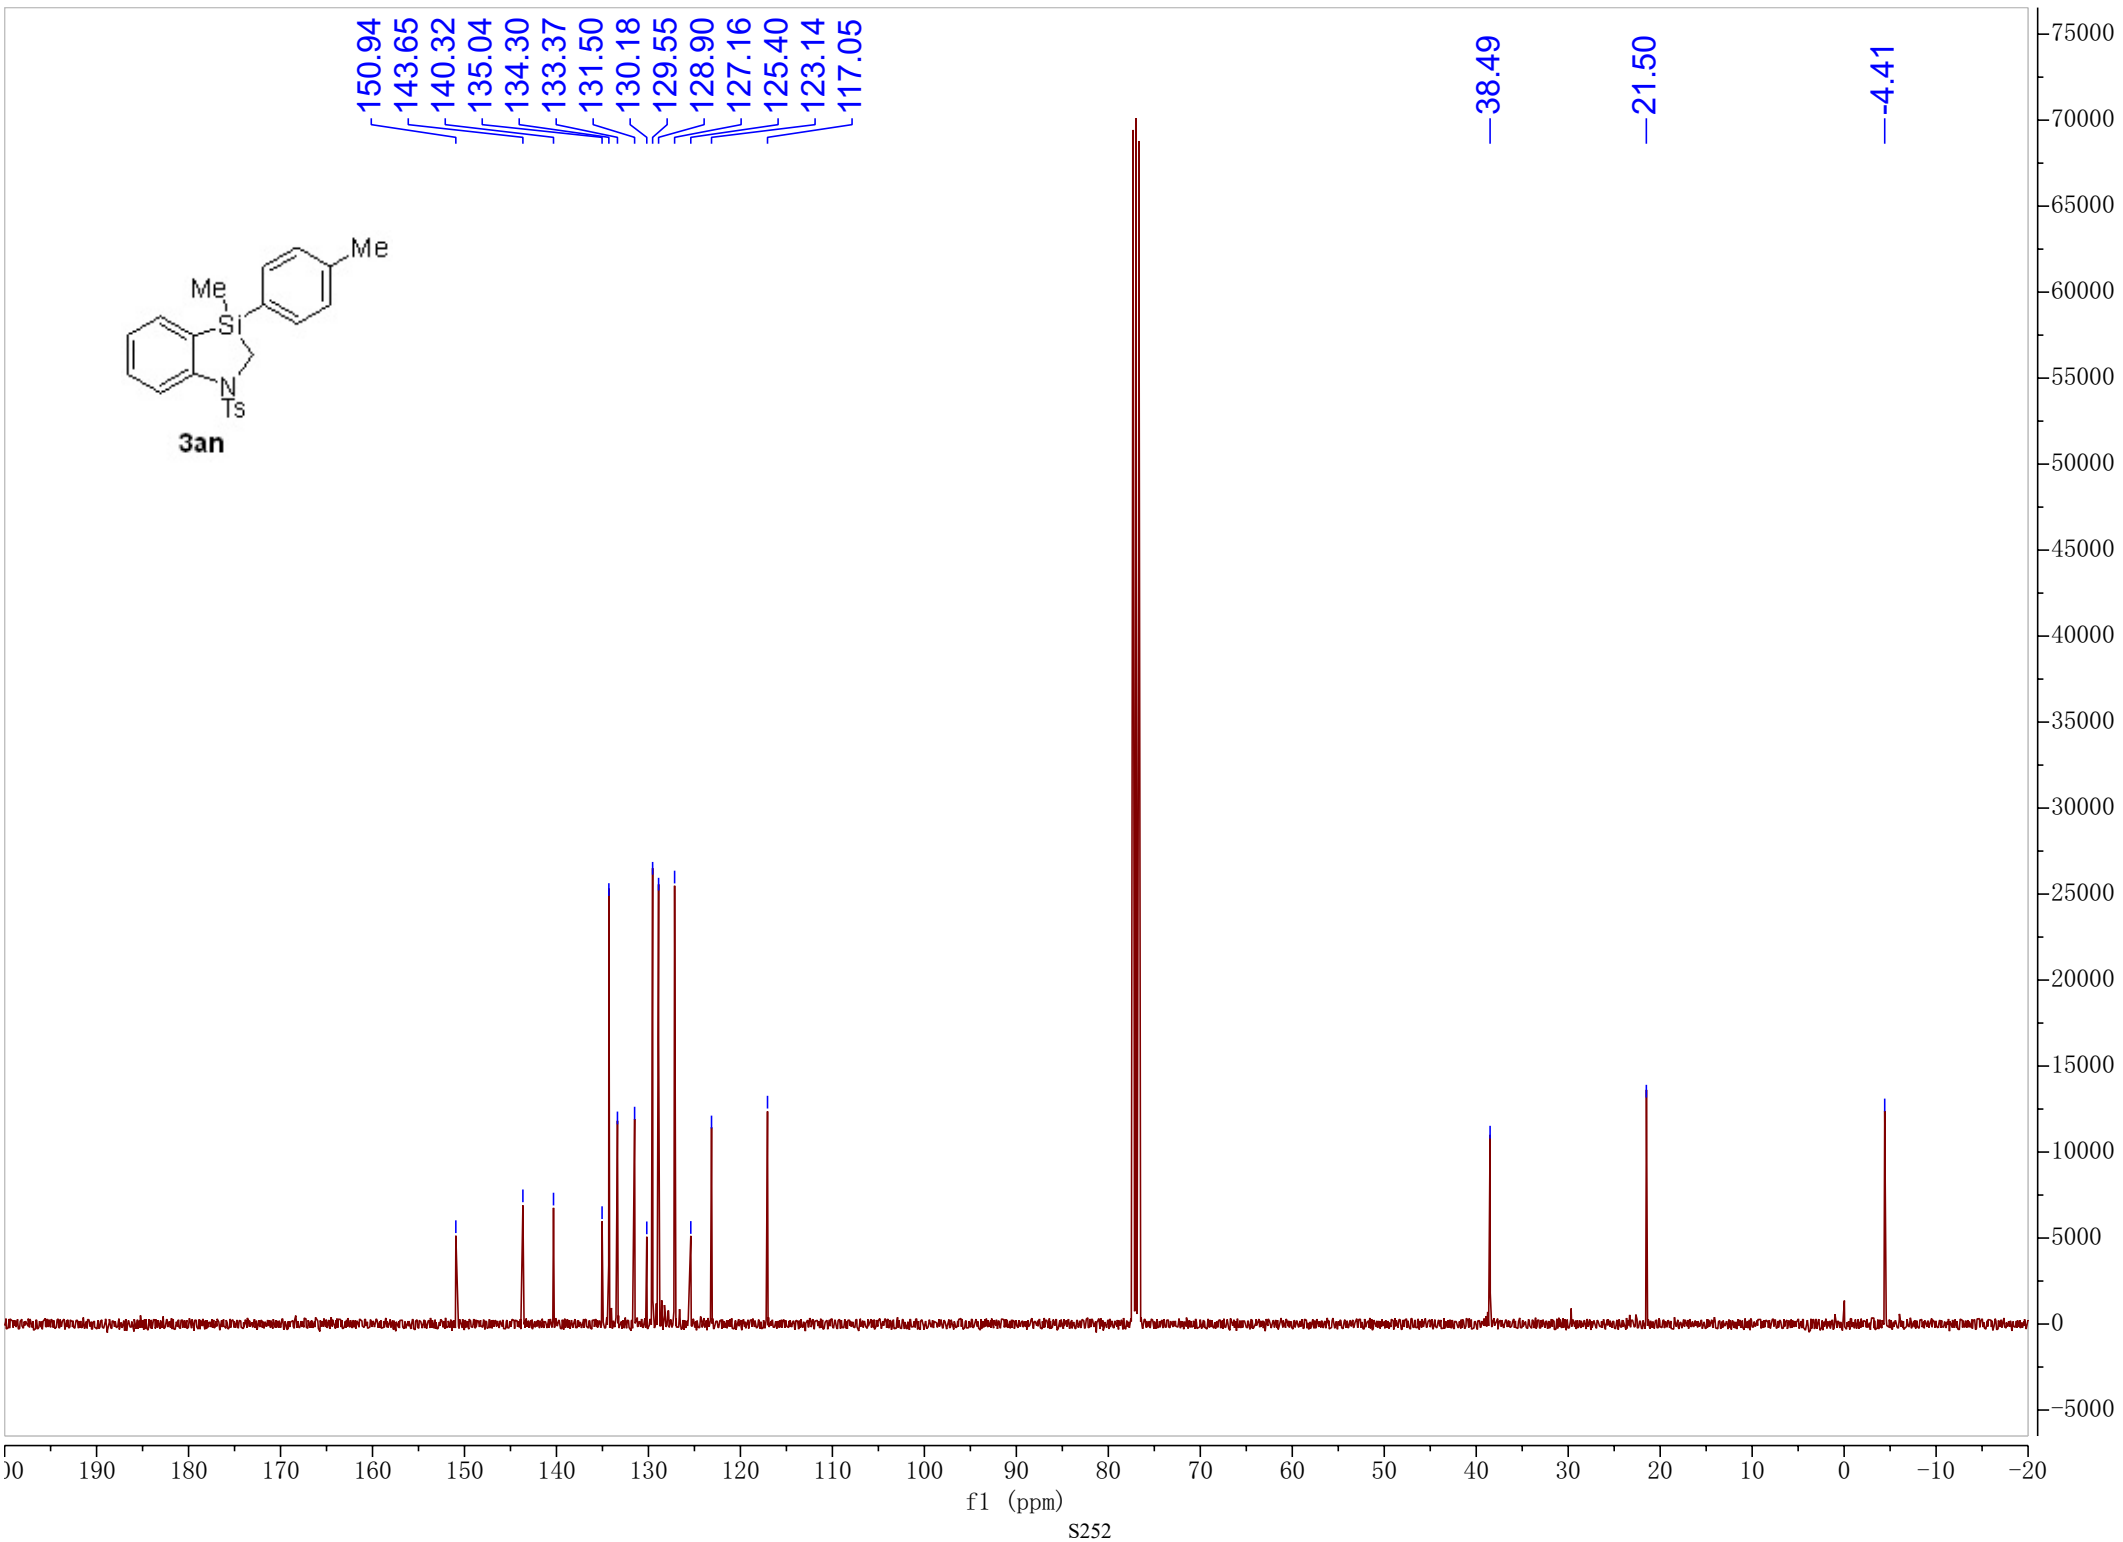

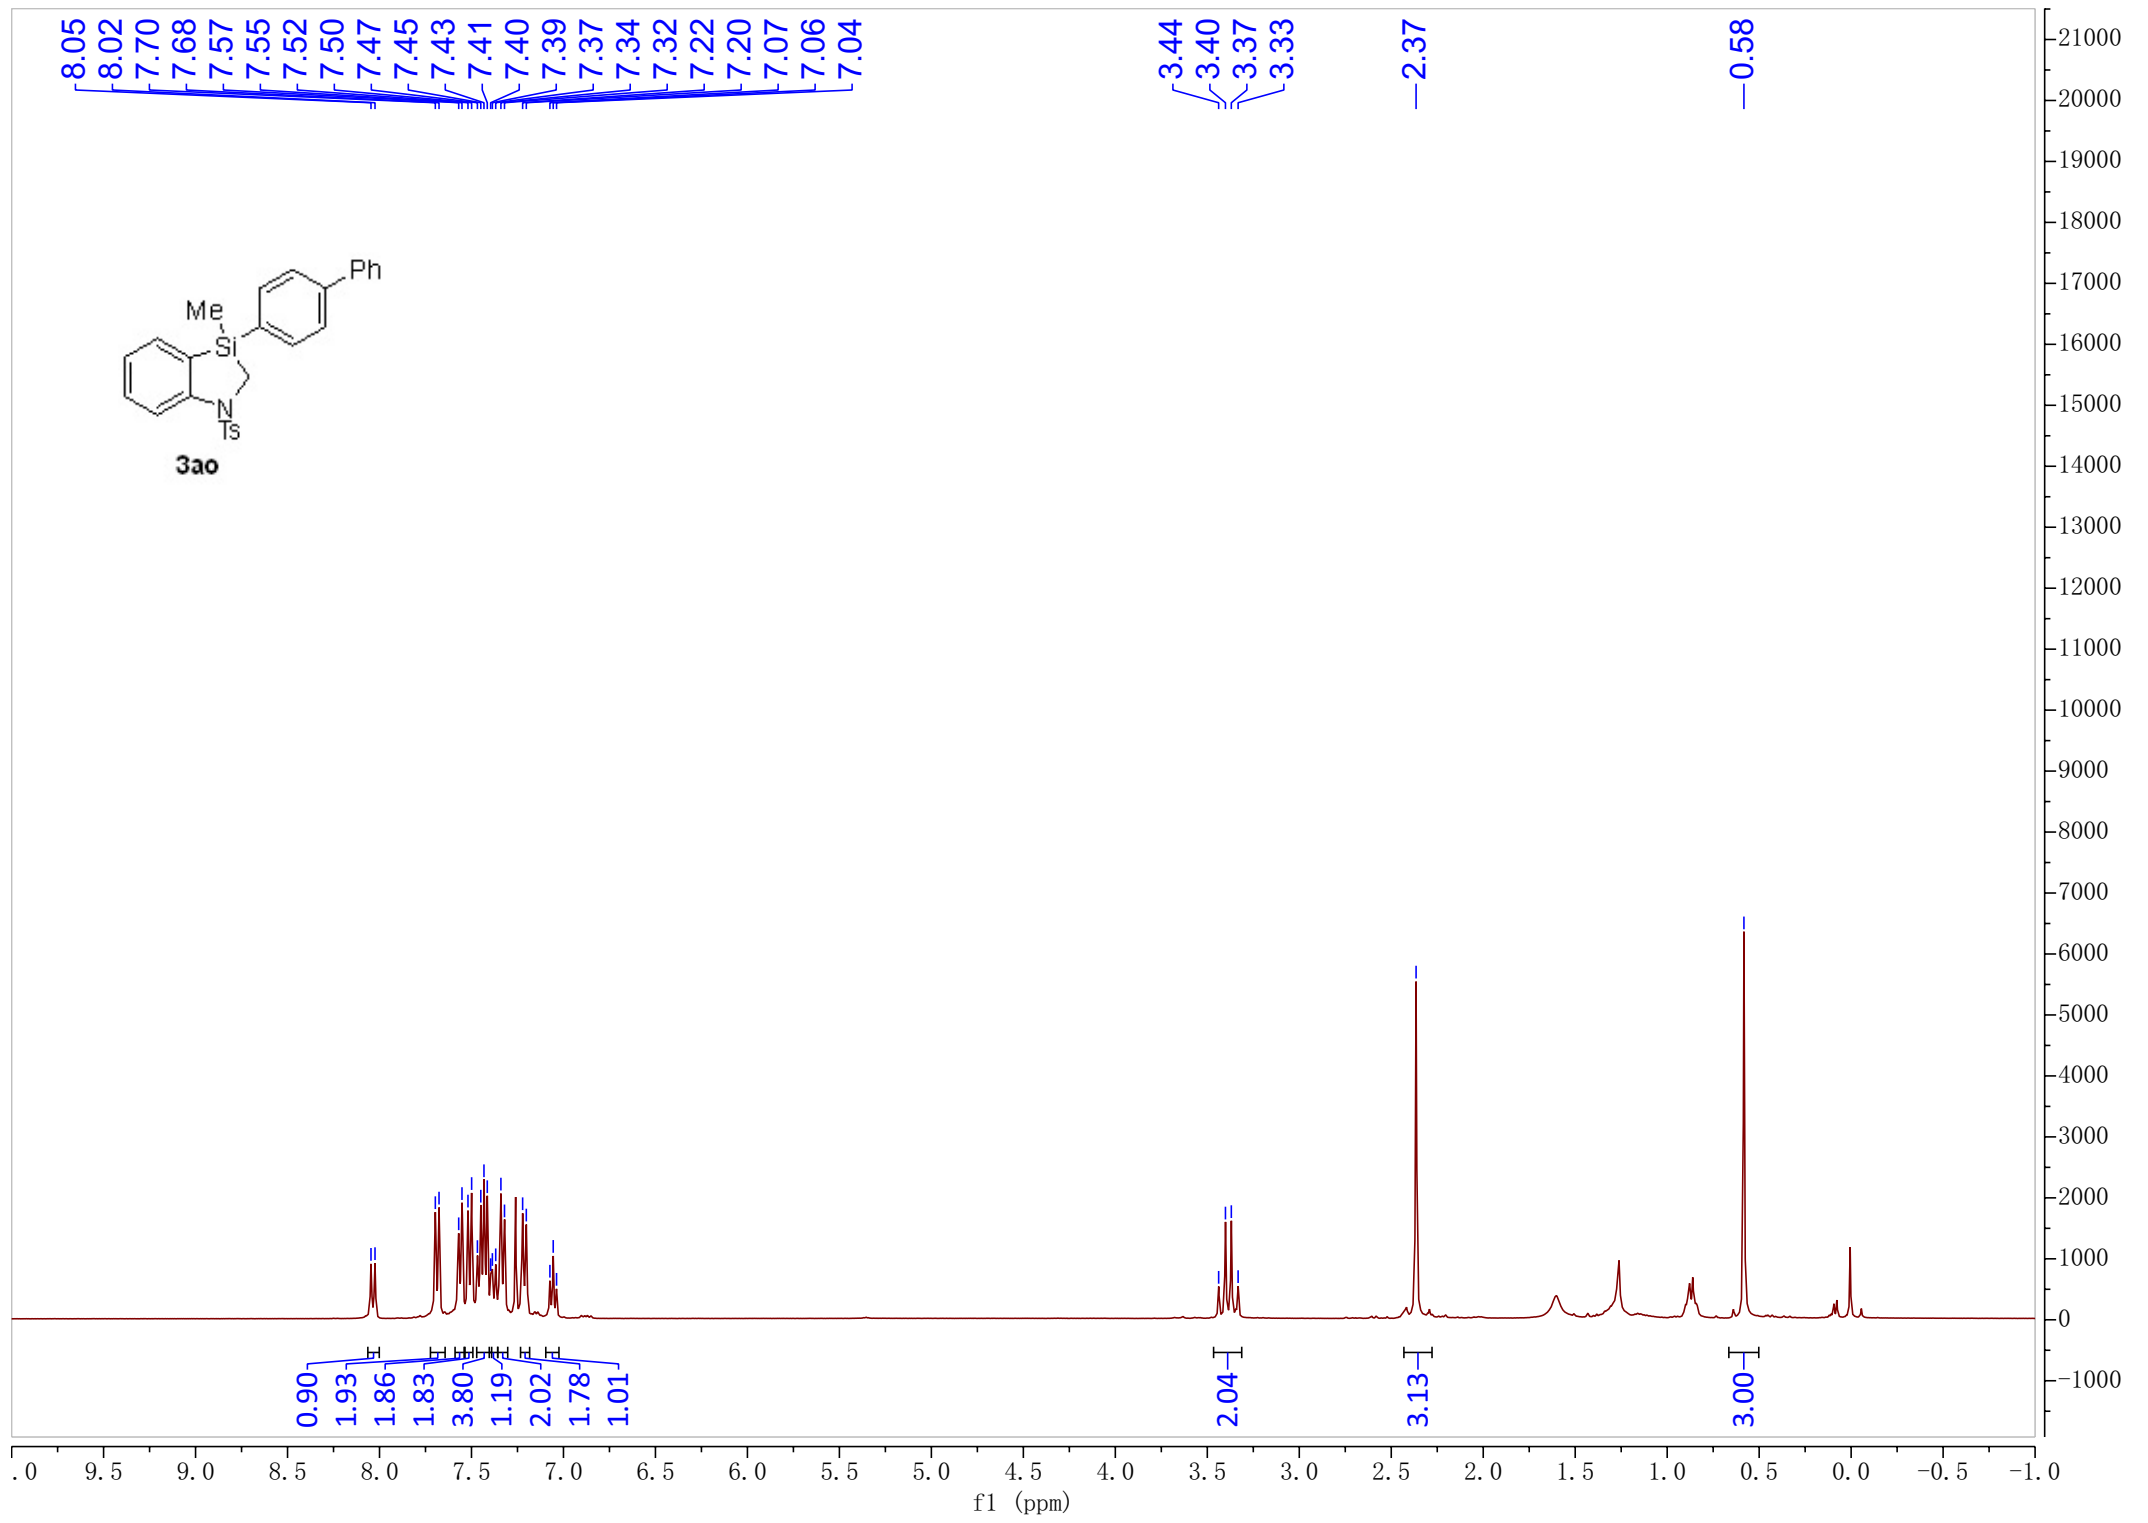

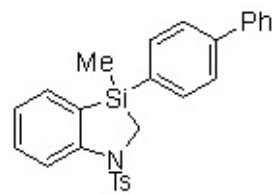

3ao

151.03  
143.72  
142.98  
140.56  
135.04  
134.75  
133.42  
132.53  
131.65  
129.58  
128.85  
127.72  
127.18  
127.10  
126.78  
125.11  
123.23  
117.14

-38.46  
-21.51  
-4.43

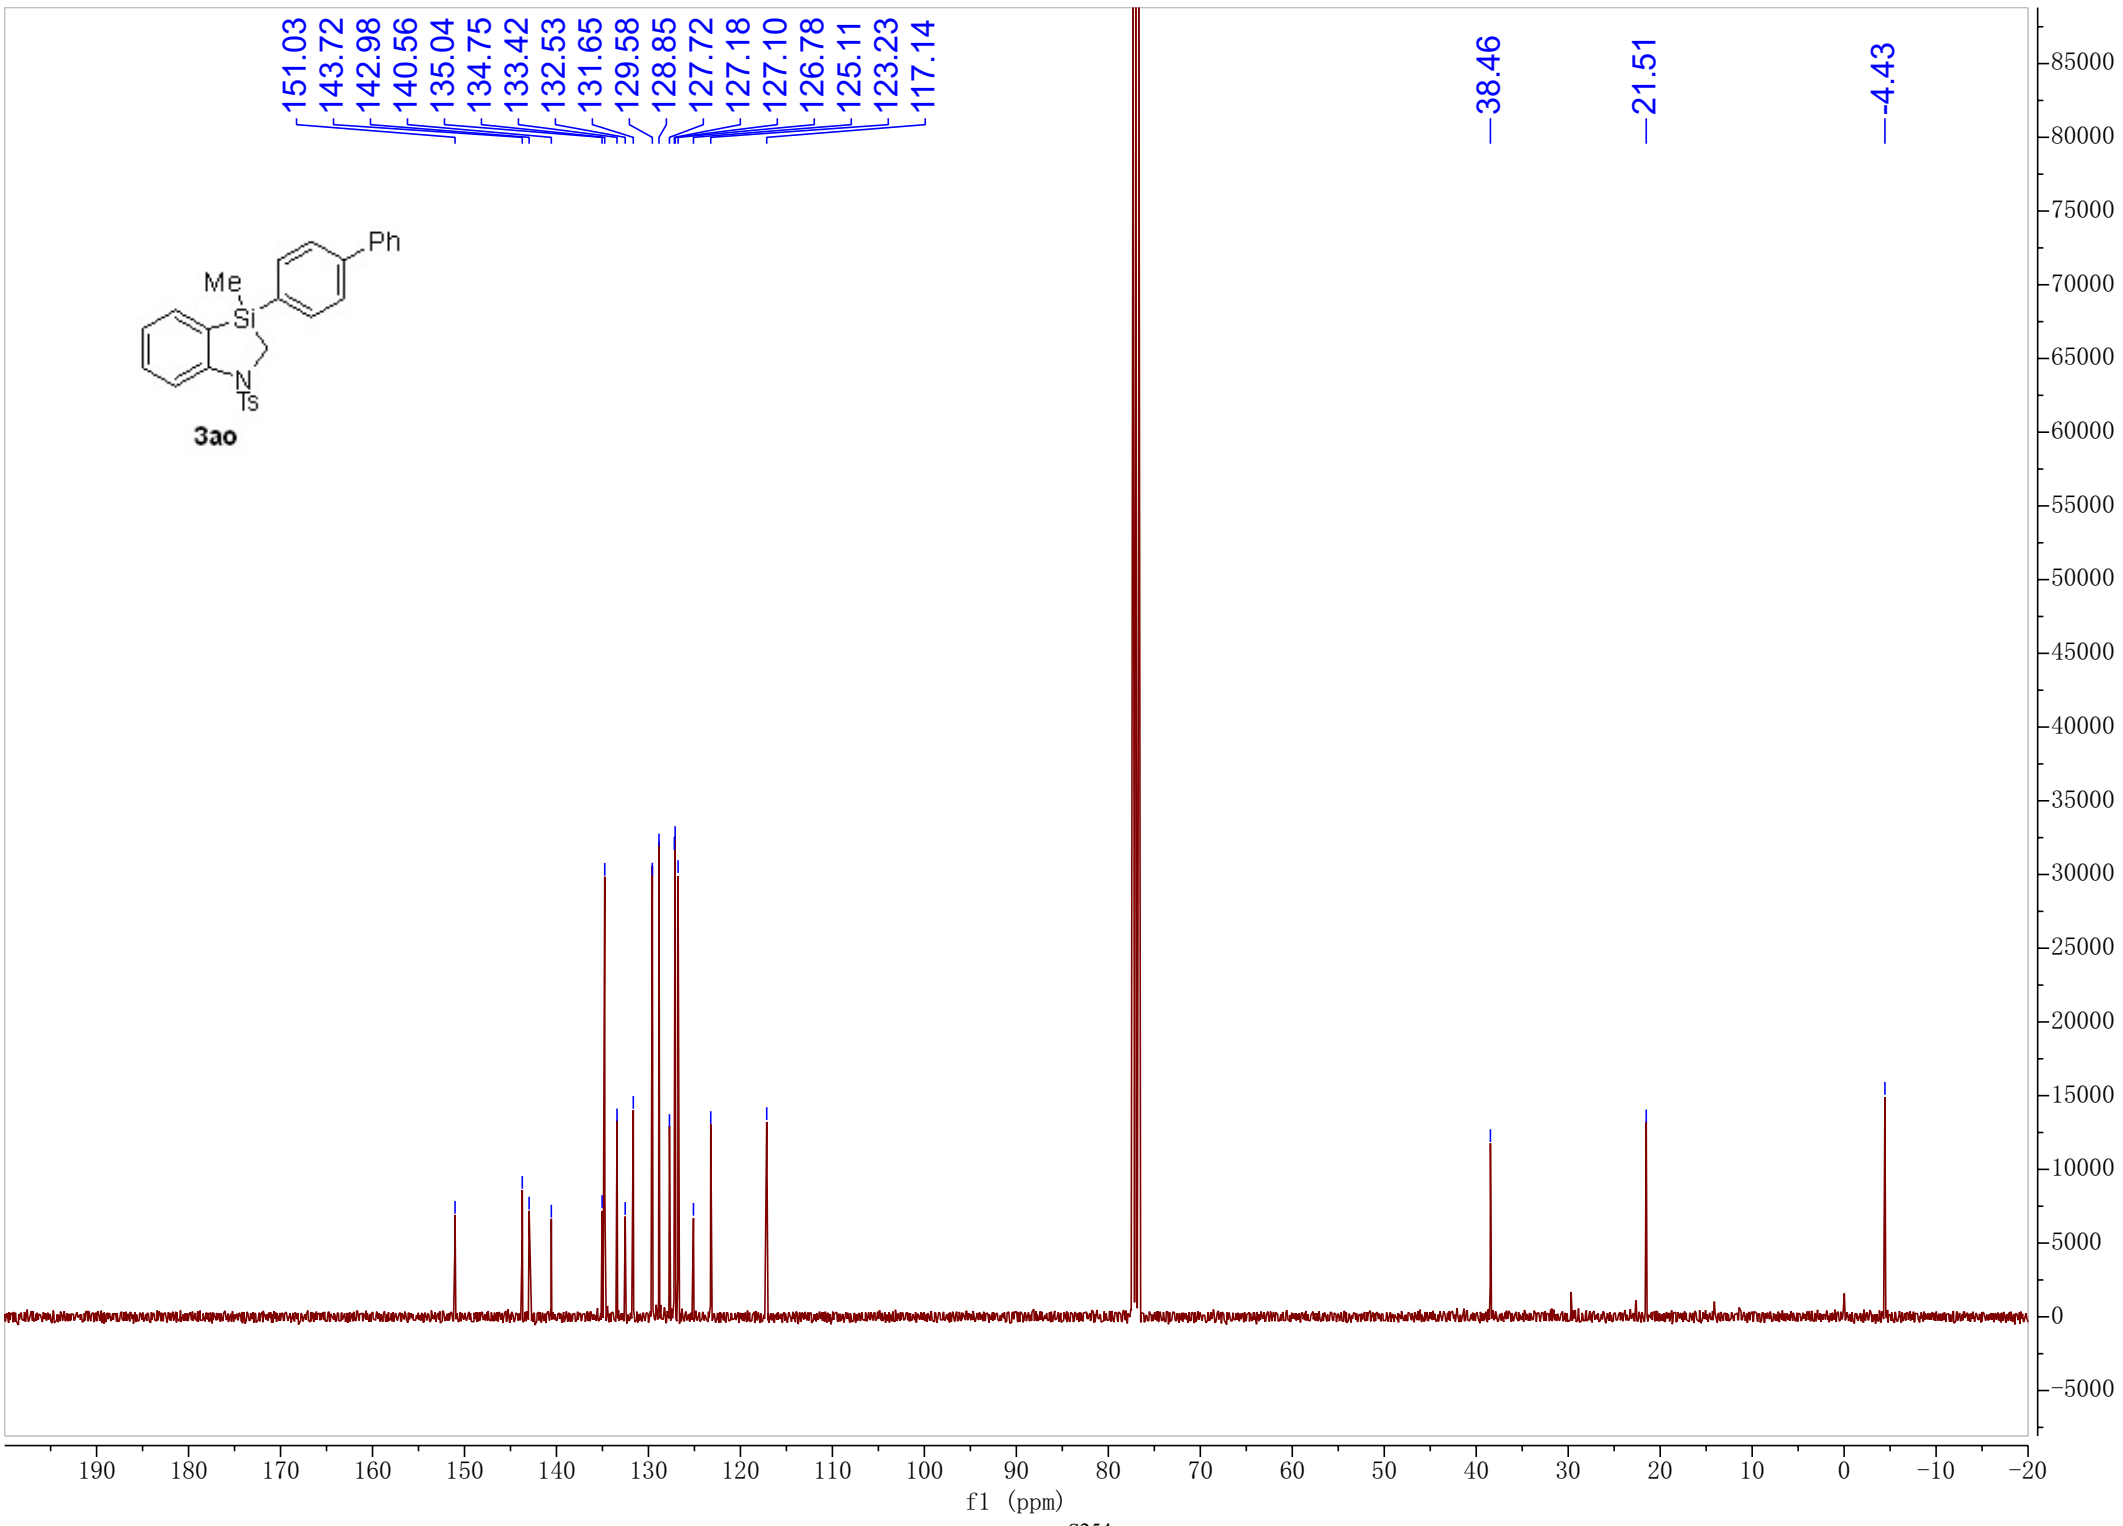

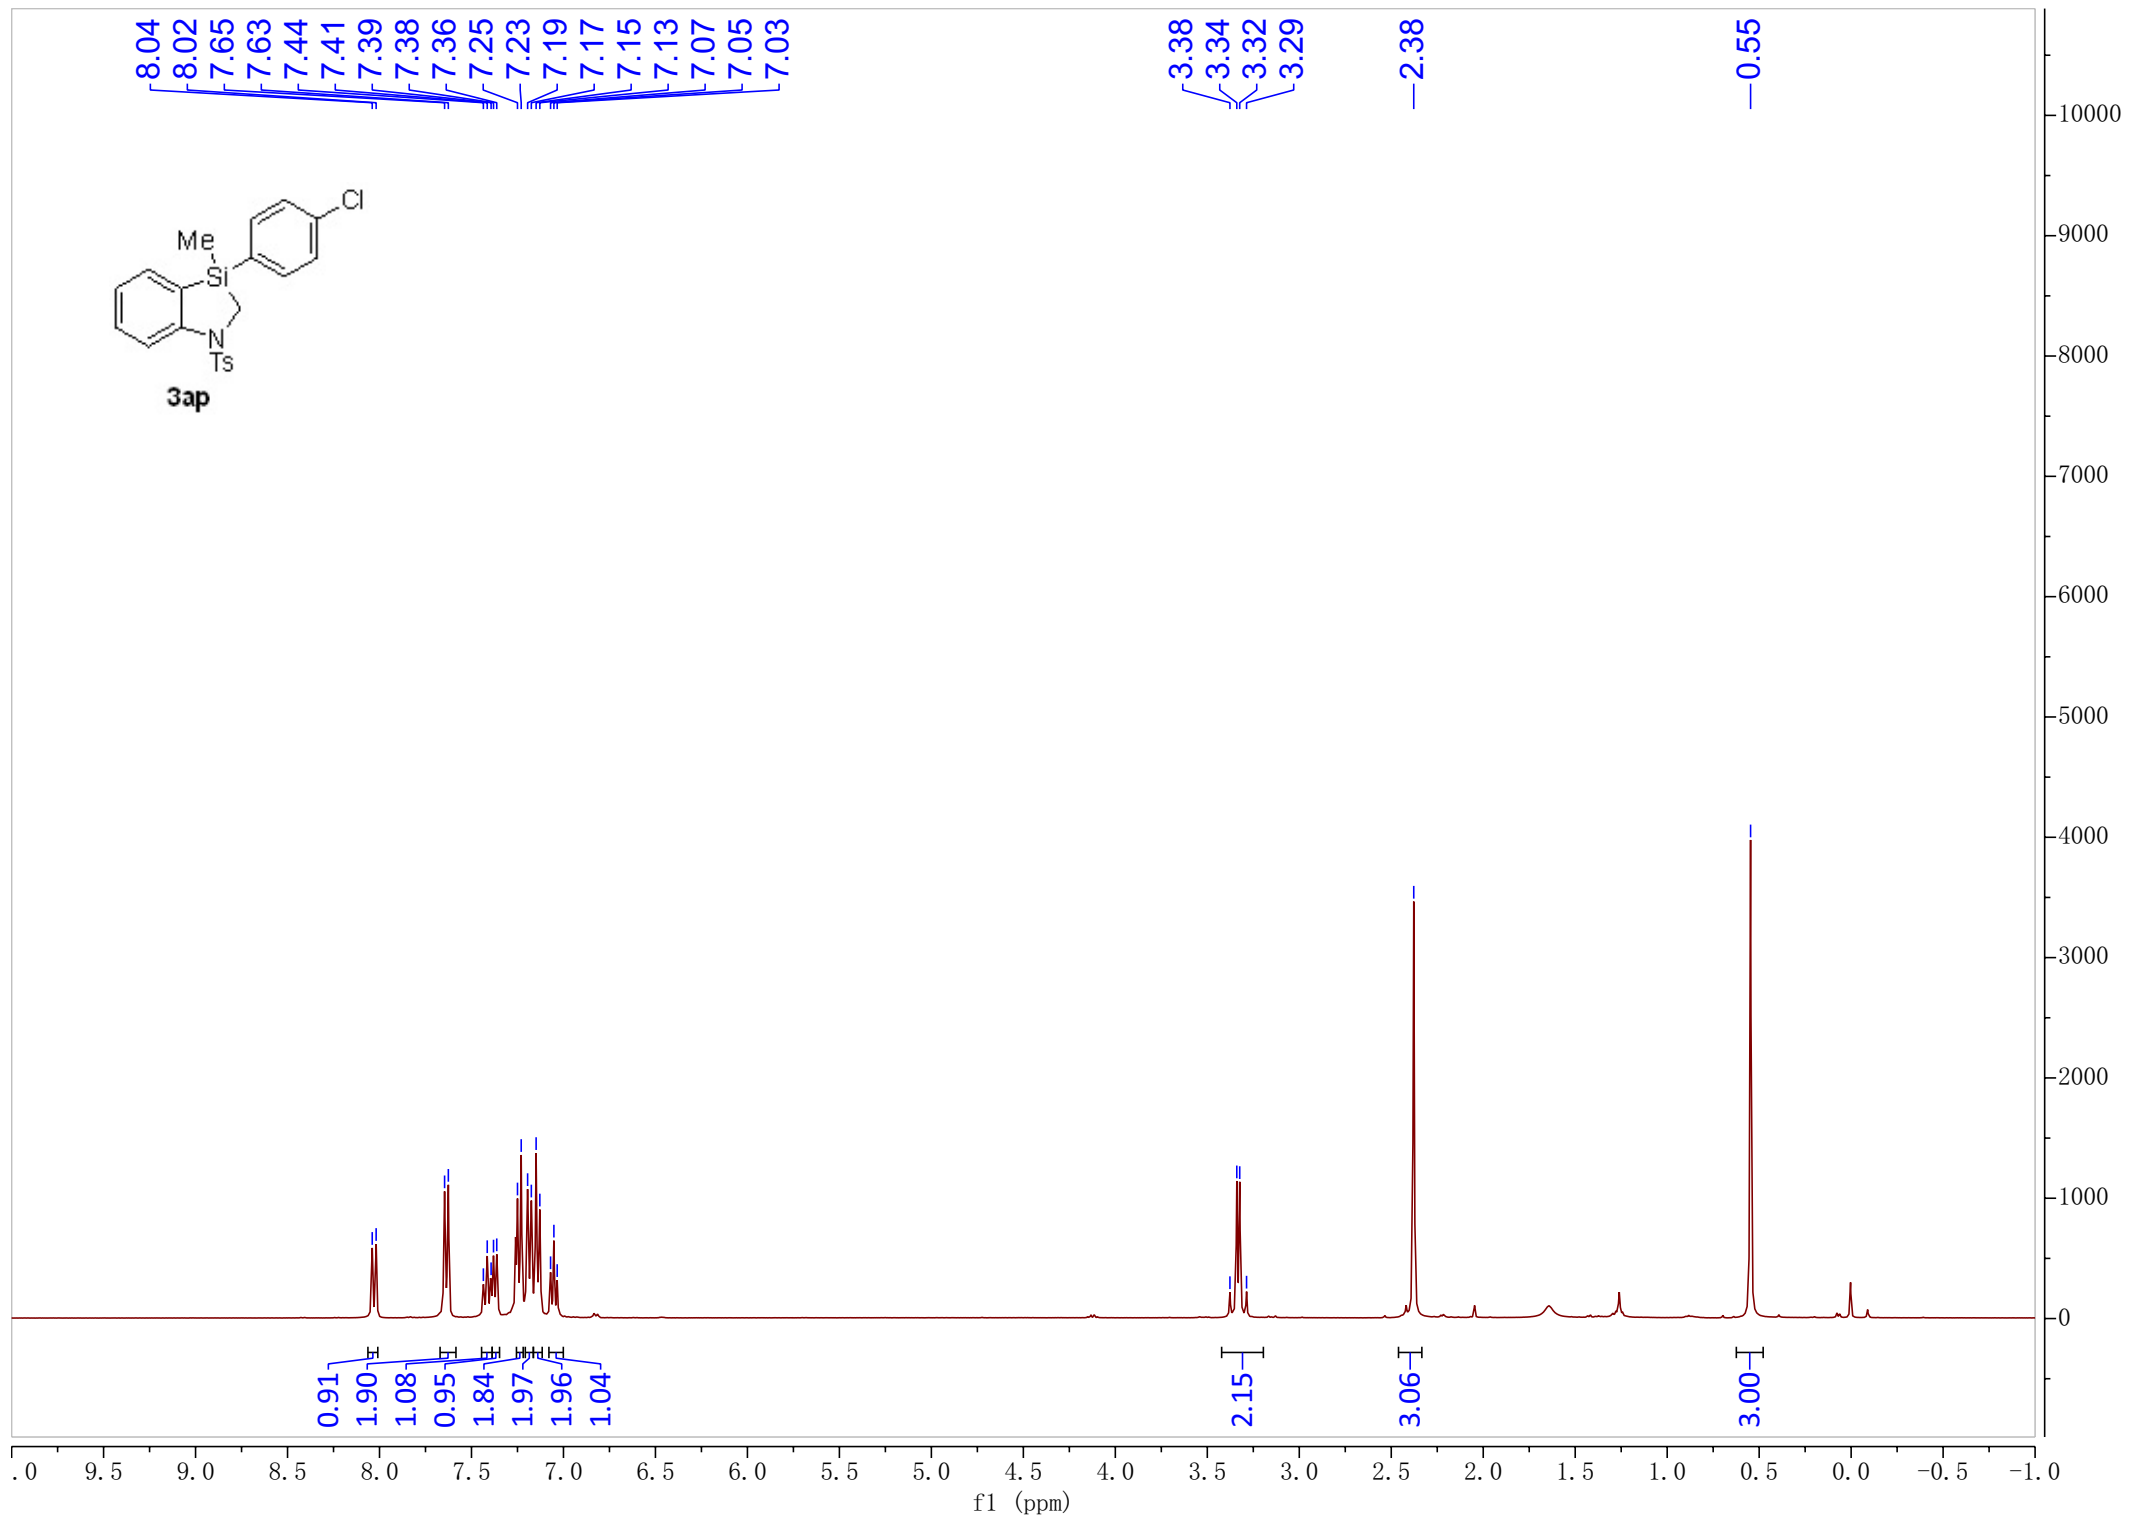

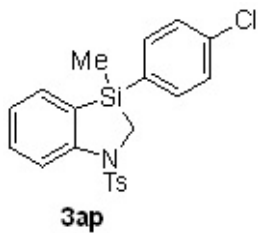

151.04  
143.81  
136.61  
135.50  
134.87  
133.30  
132.33  
131.80  
129.55  
128.32  
127.11  
124.62  
123.36  
117.36

-38.37

-21.49

-4.58

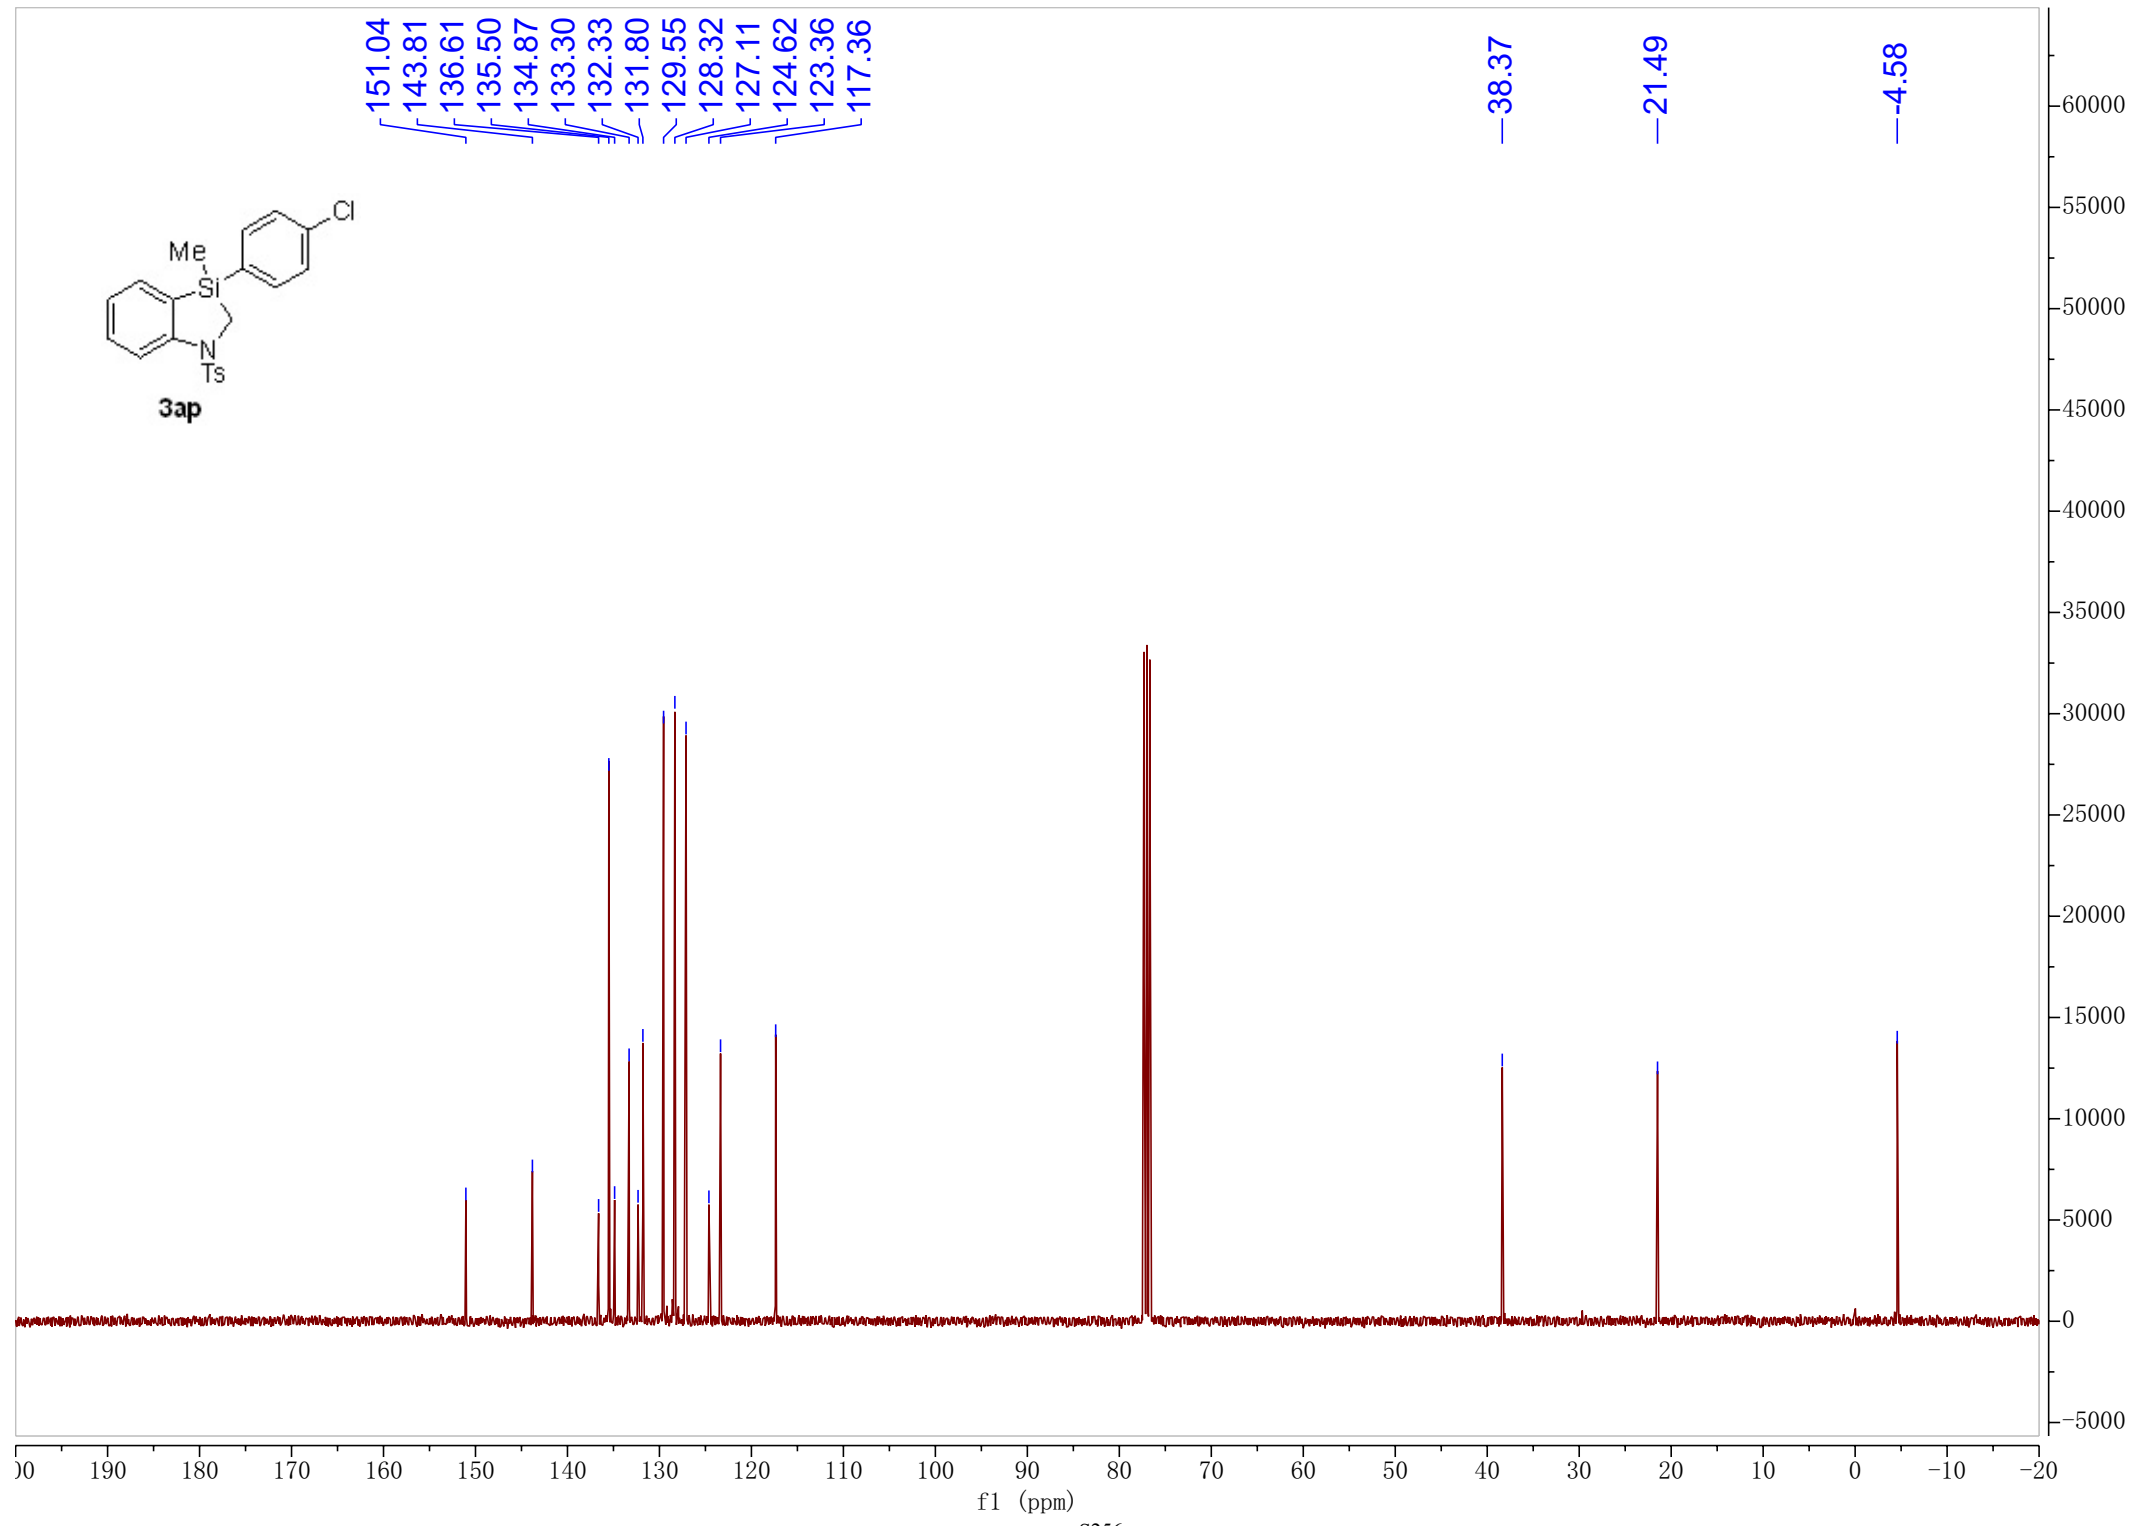



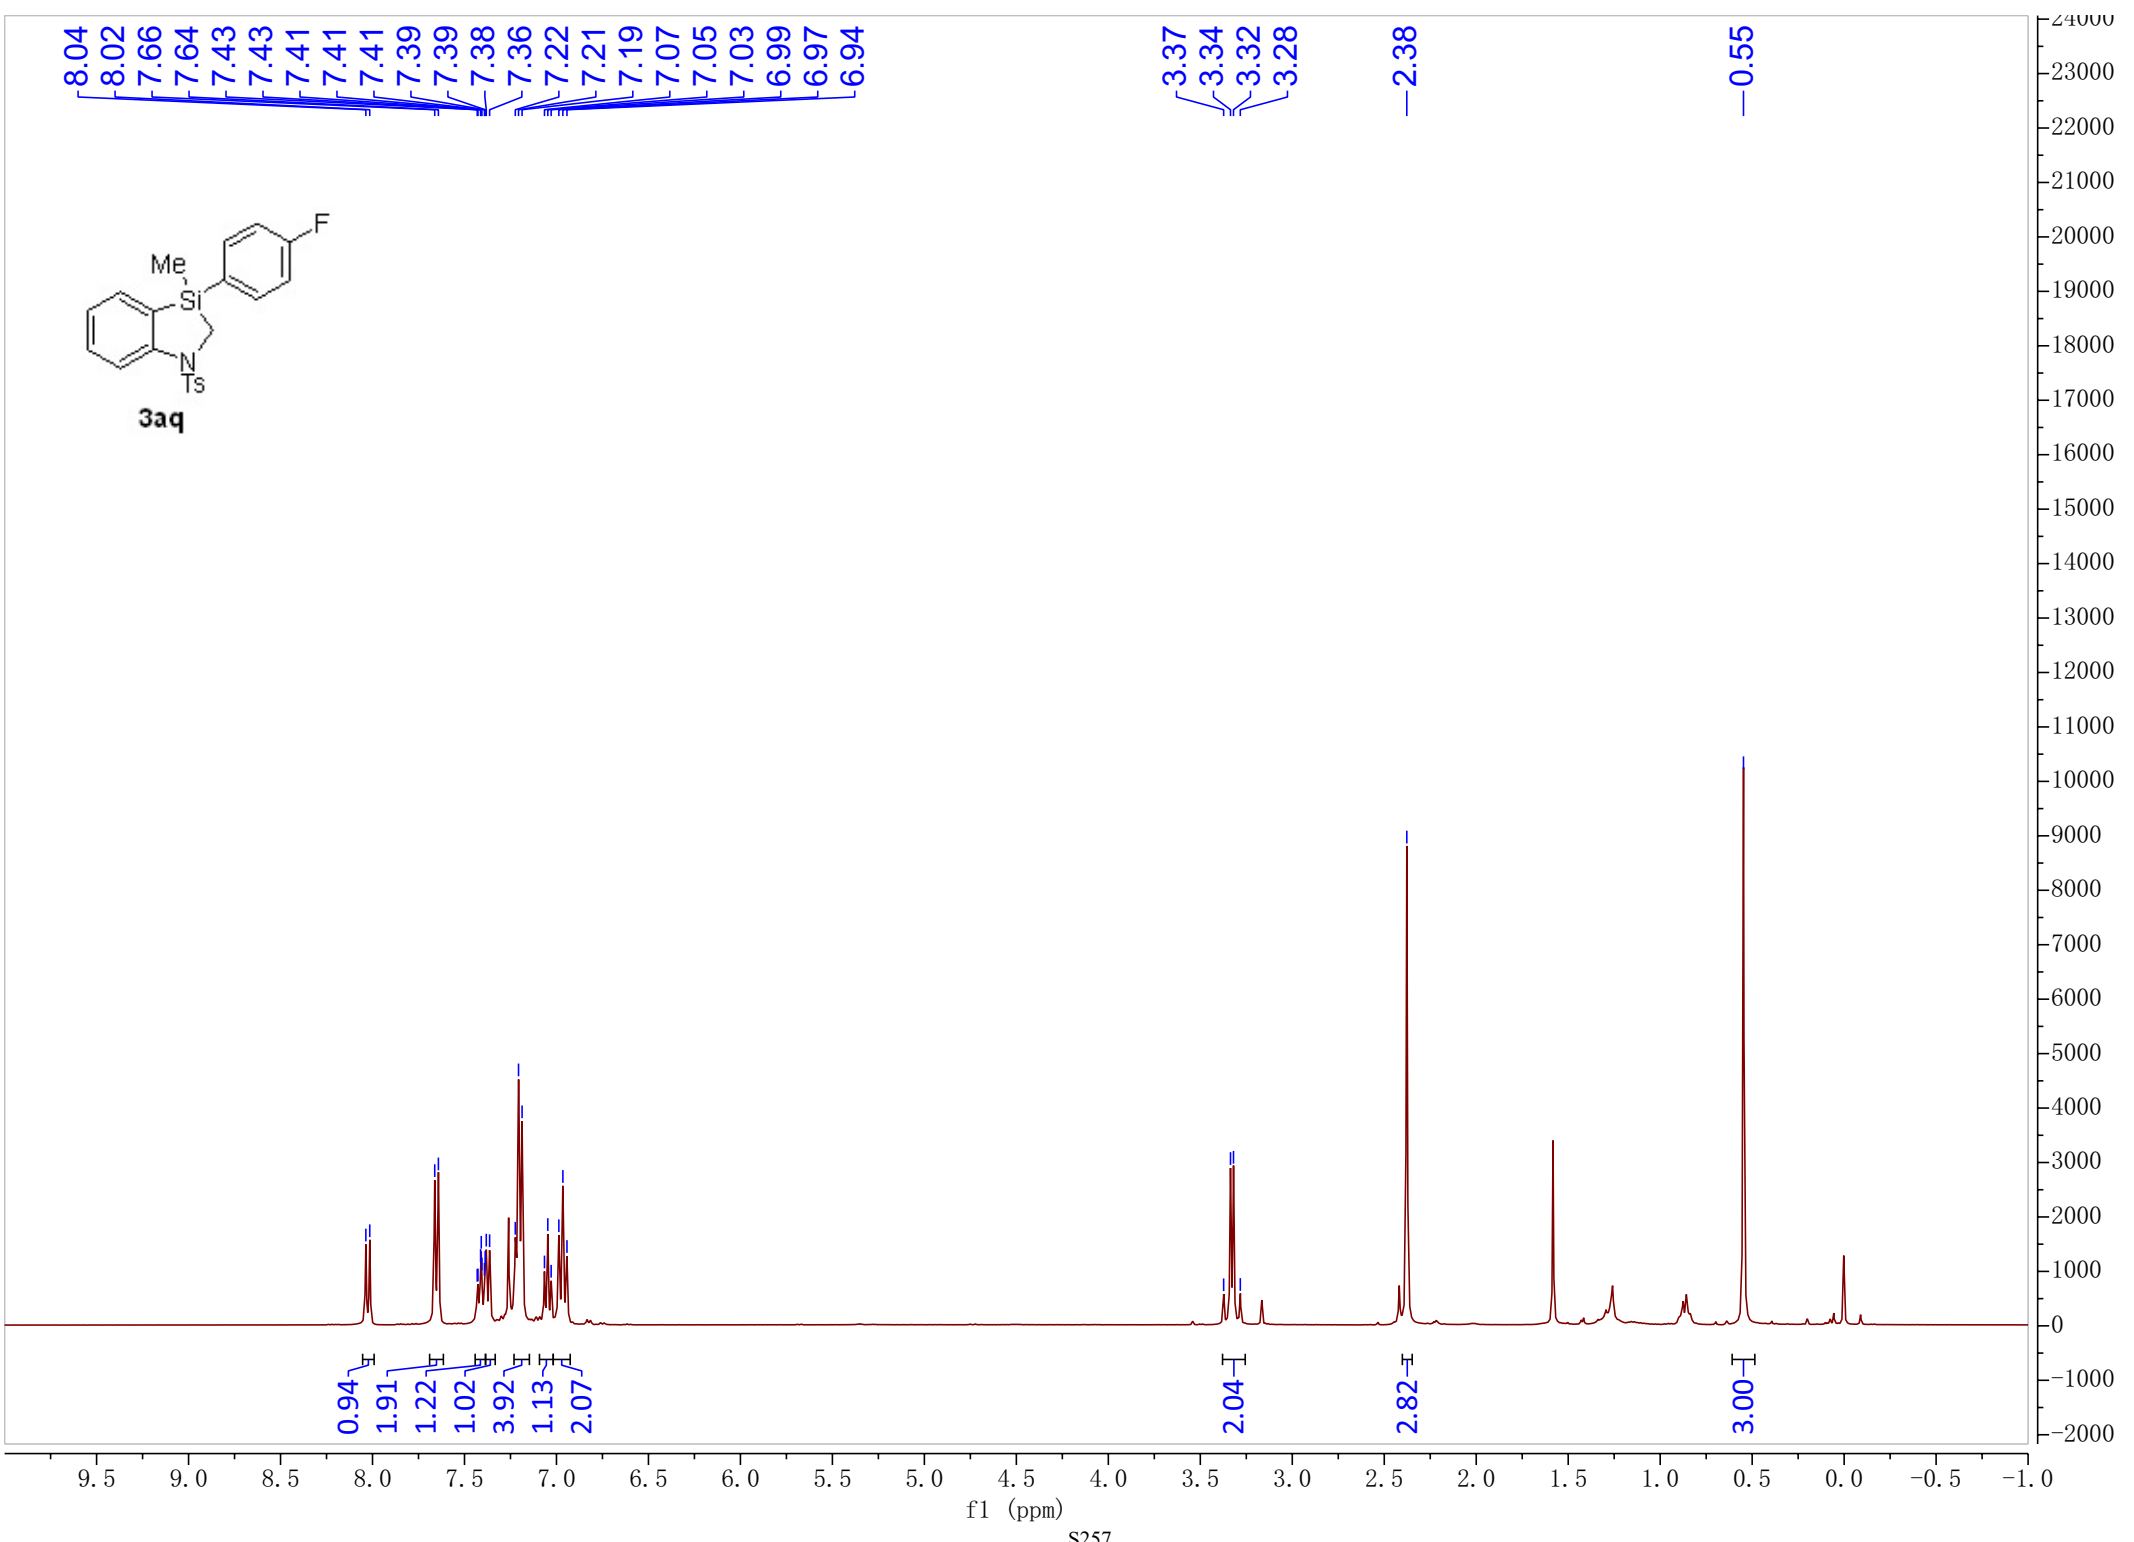

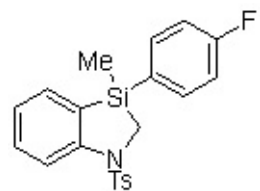

3aq

- 165.52
- 163.03
- 151.03
- 143.75
- 136.36
- 136.28
- 135.00
- 133.31
- 131.74
- 129.56
- 129.52
- 127.15
- 124.87
- 123.30
- 117.27
- 115.45
- 115.25

76.68

38.48

21.47

4.43

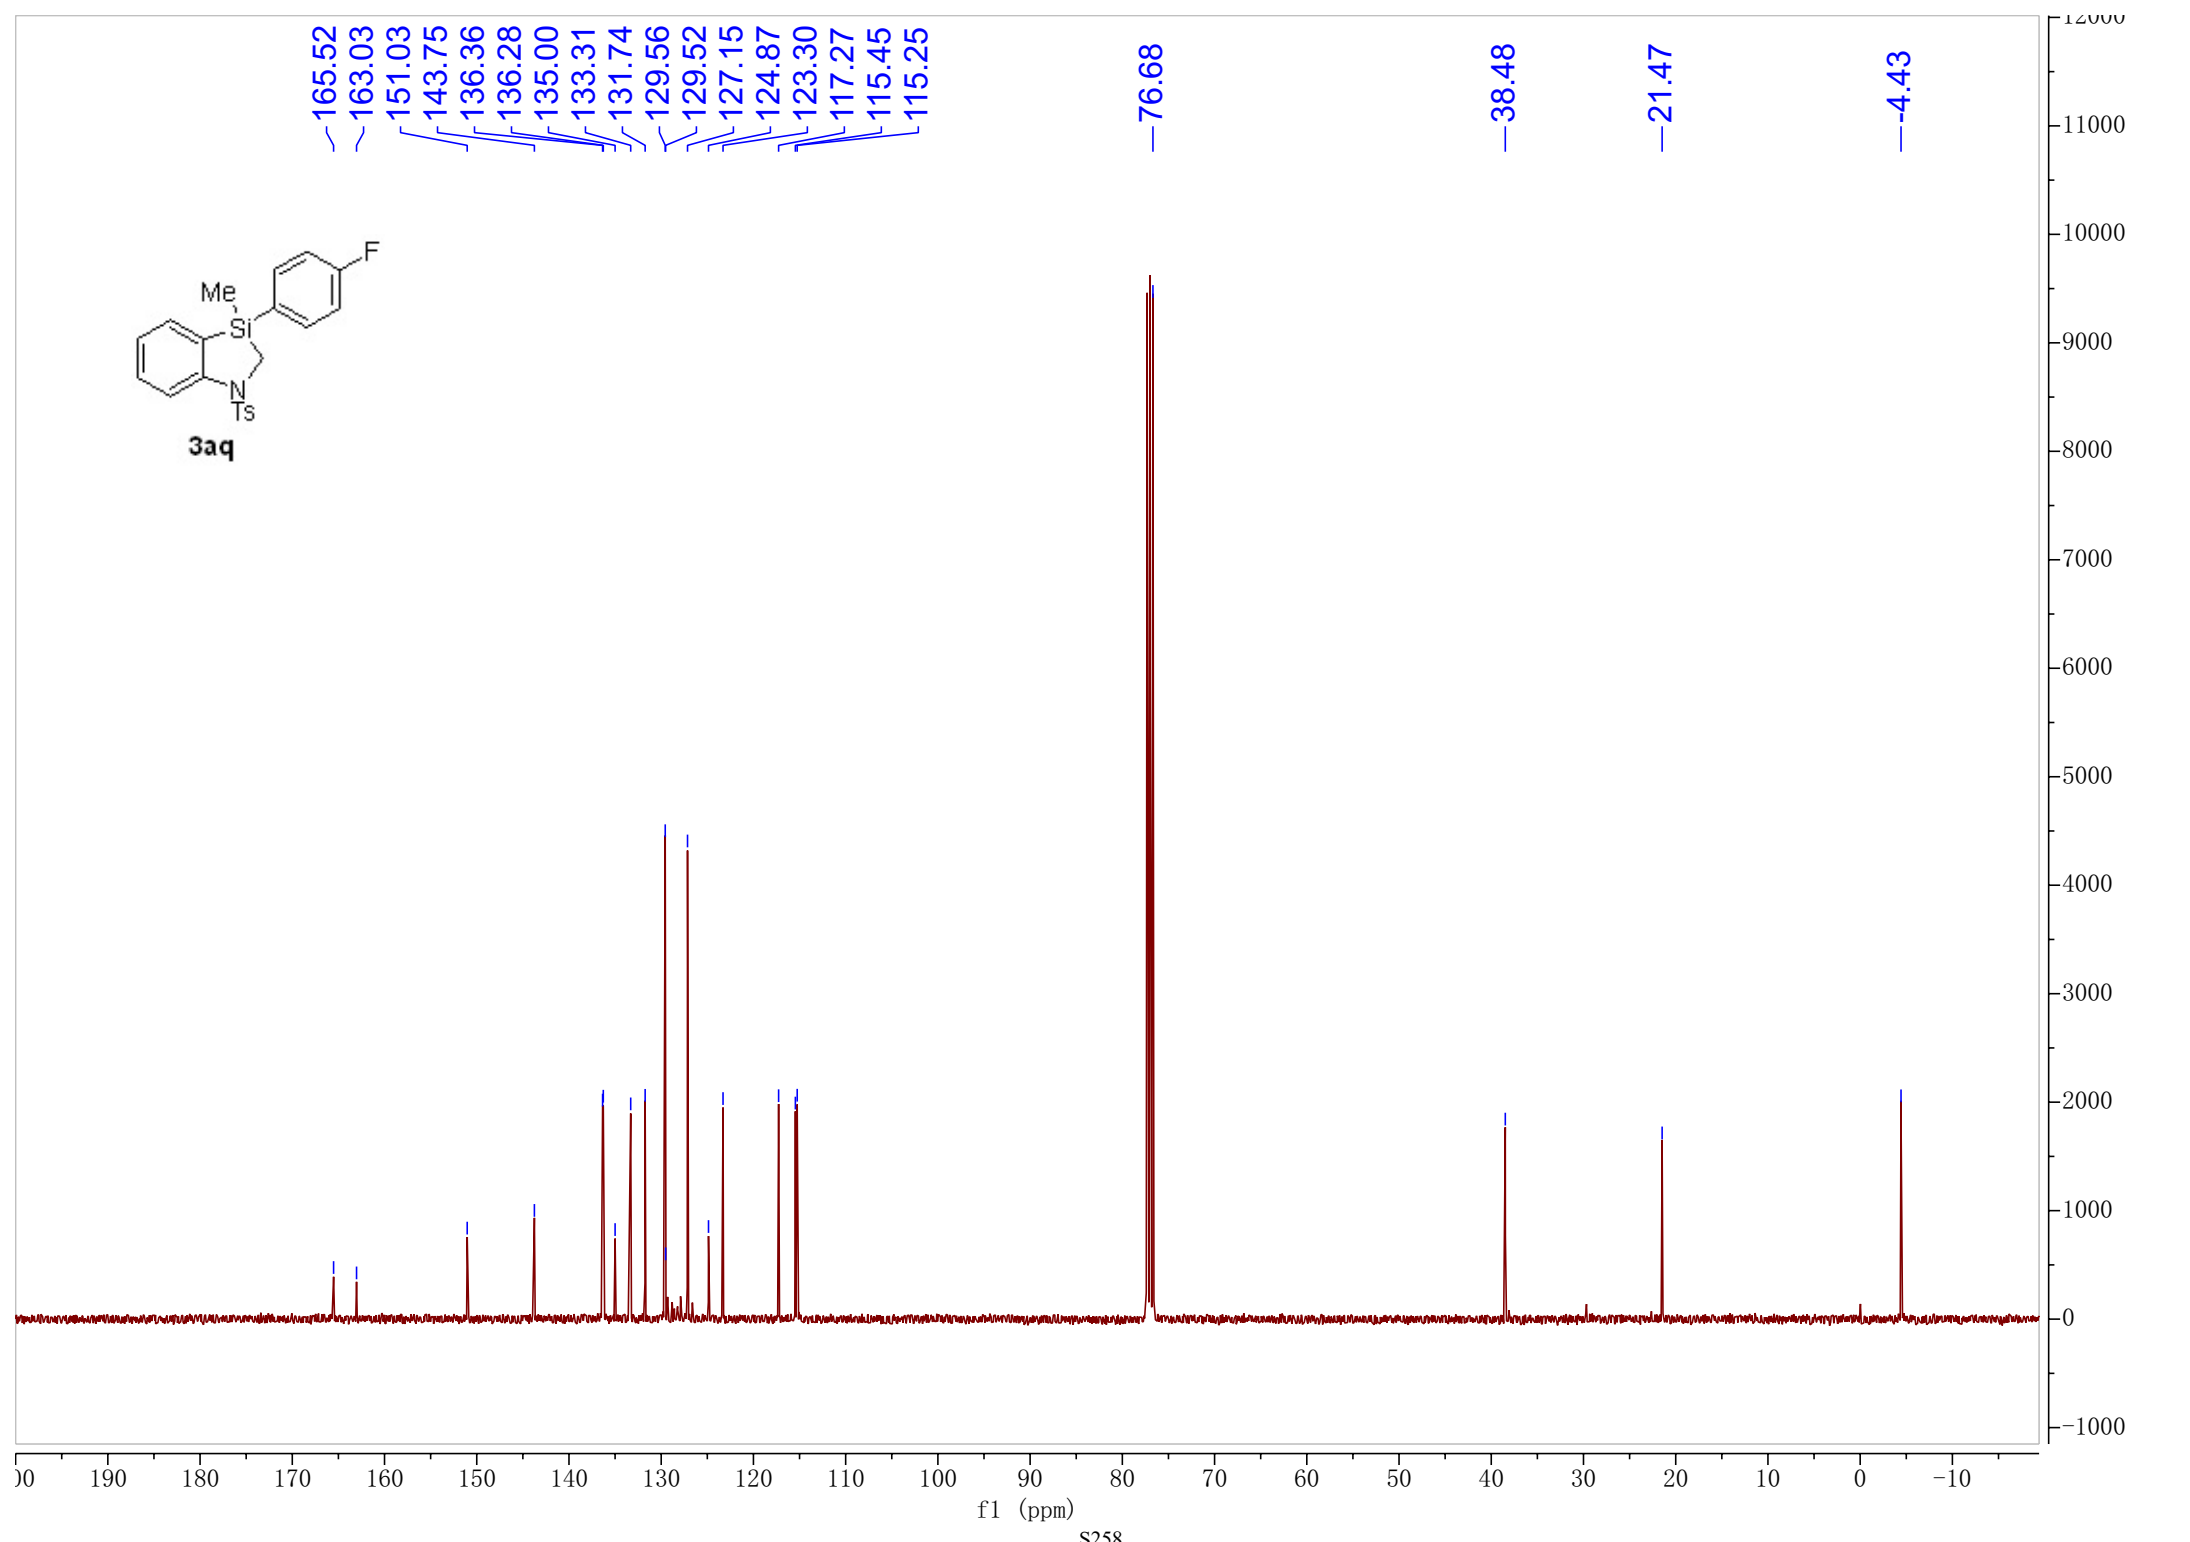

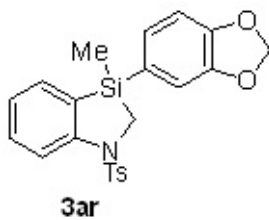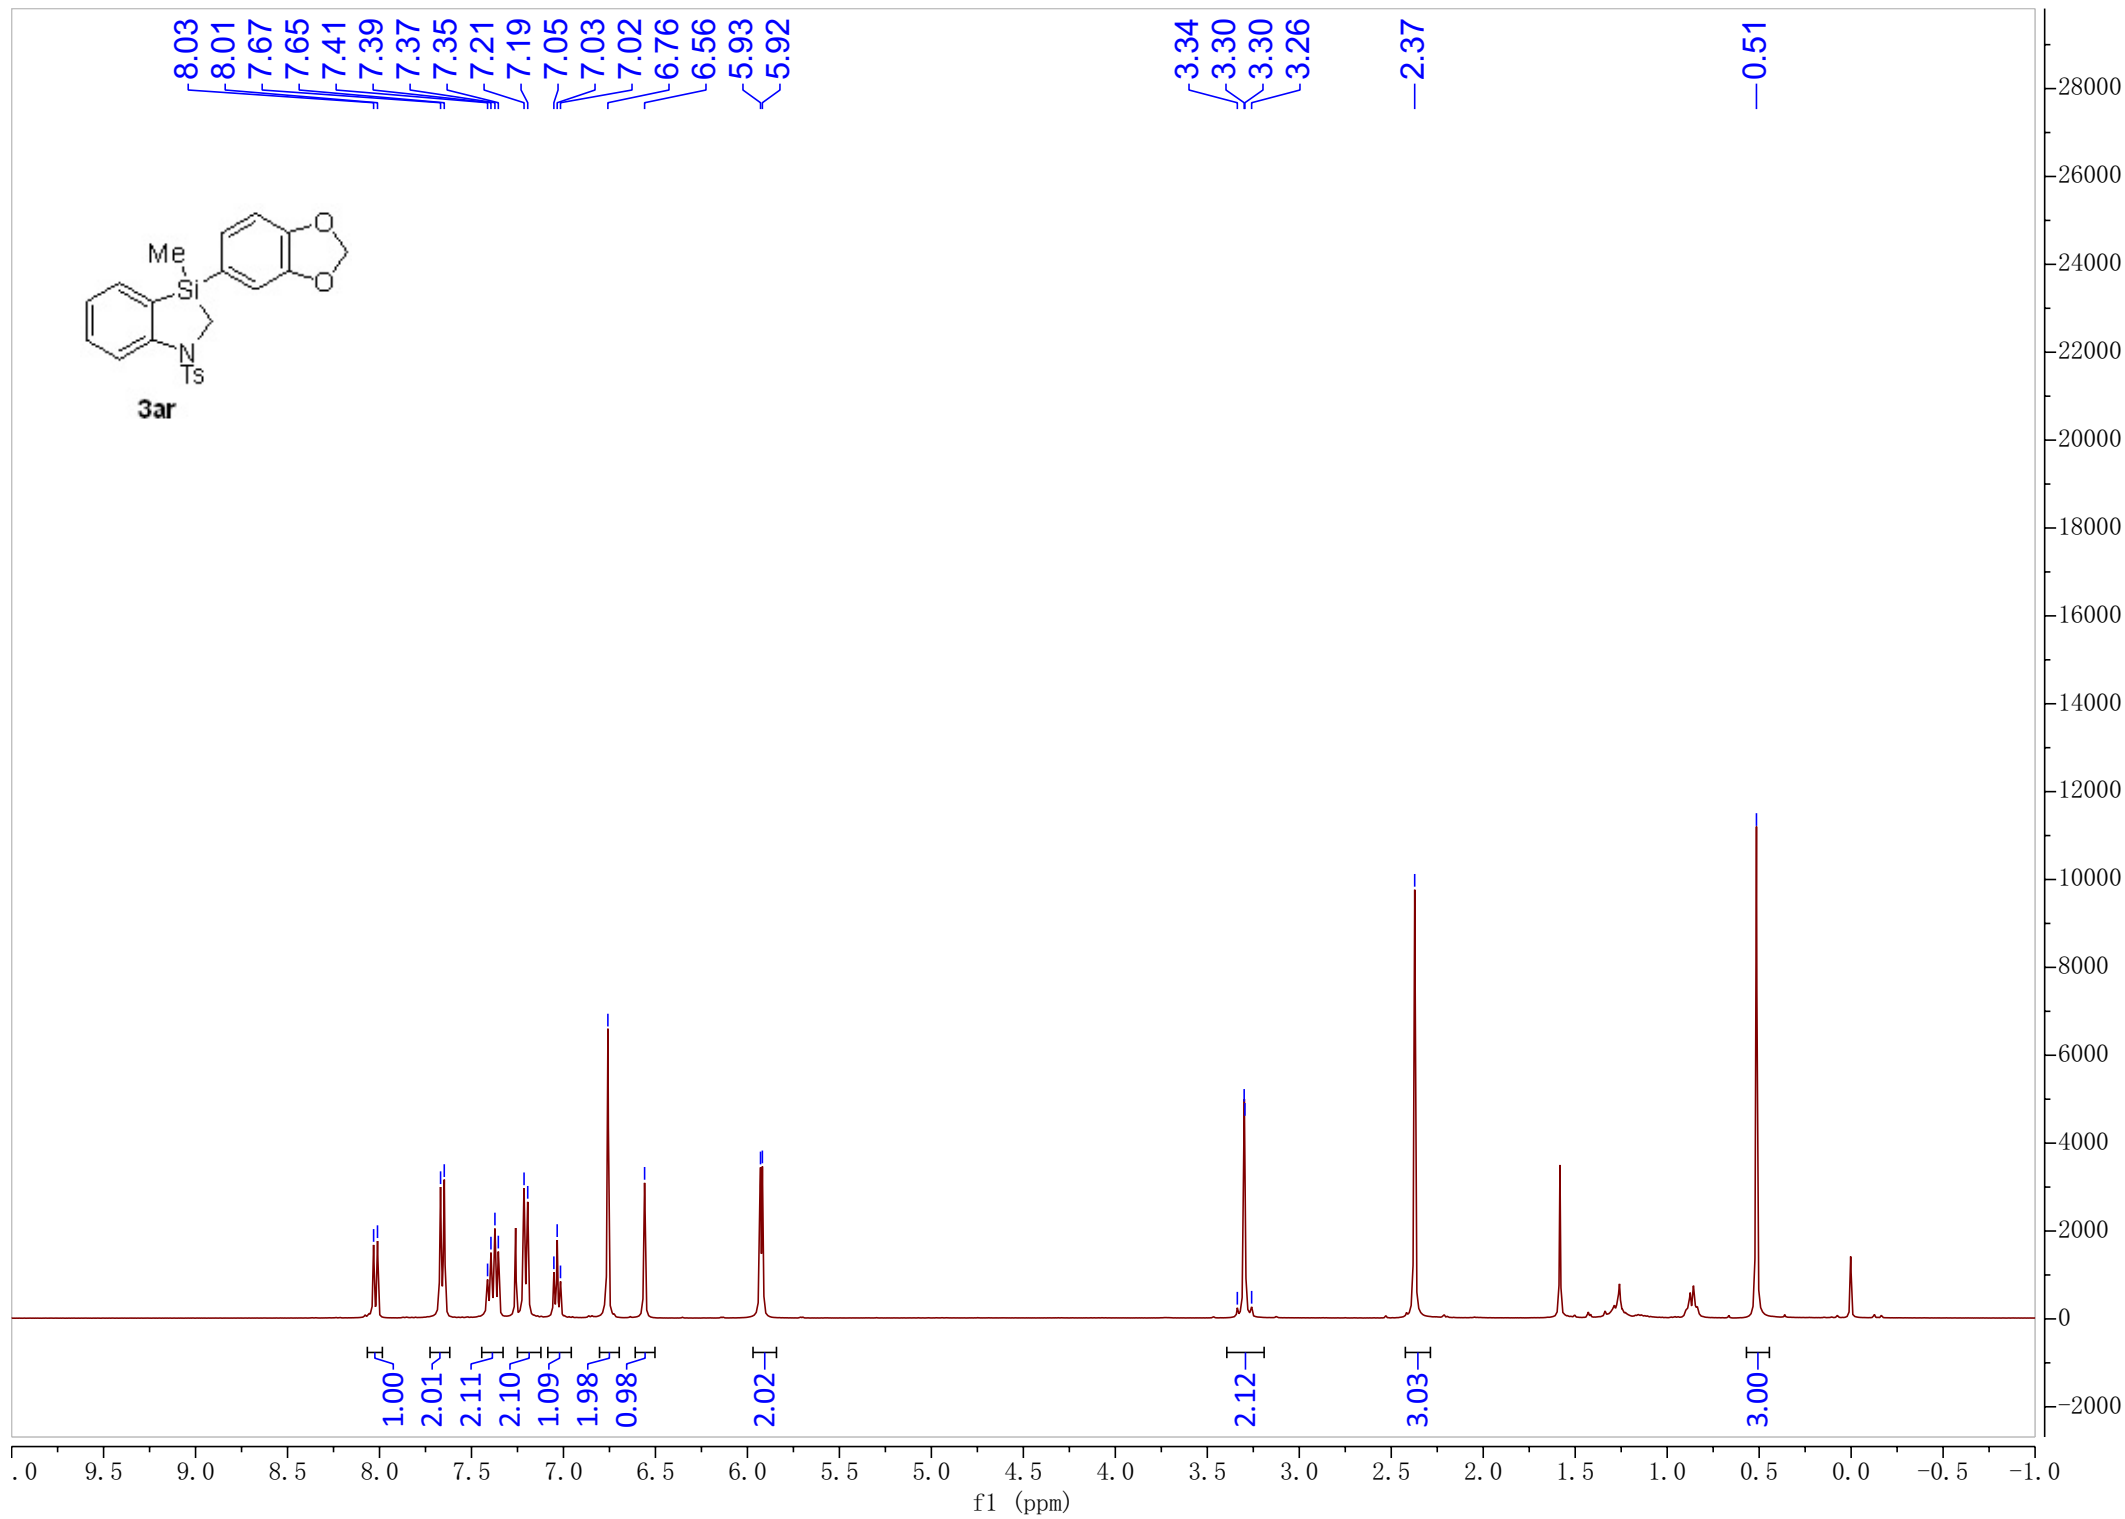

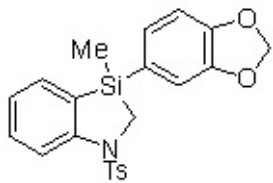

3ar

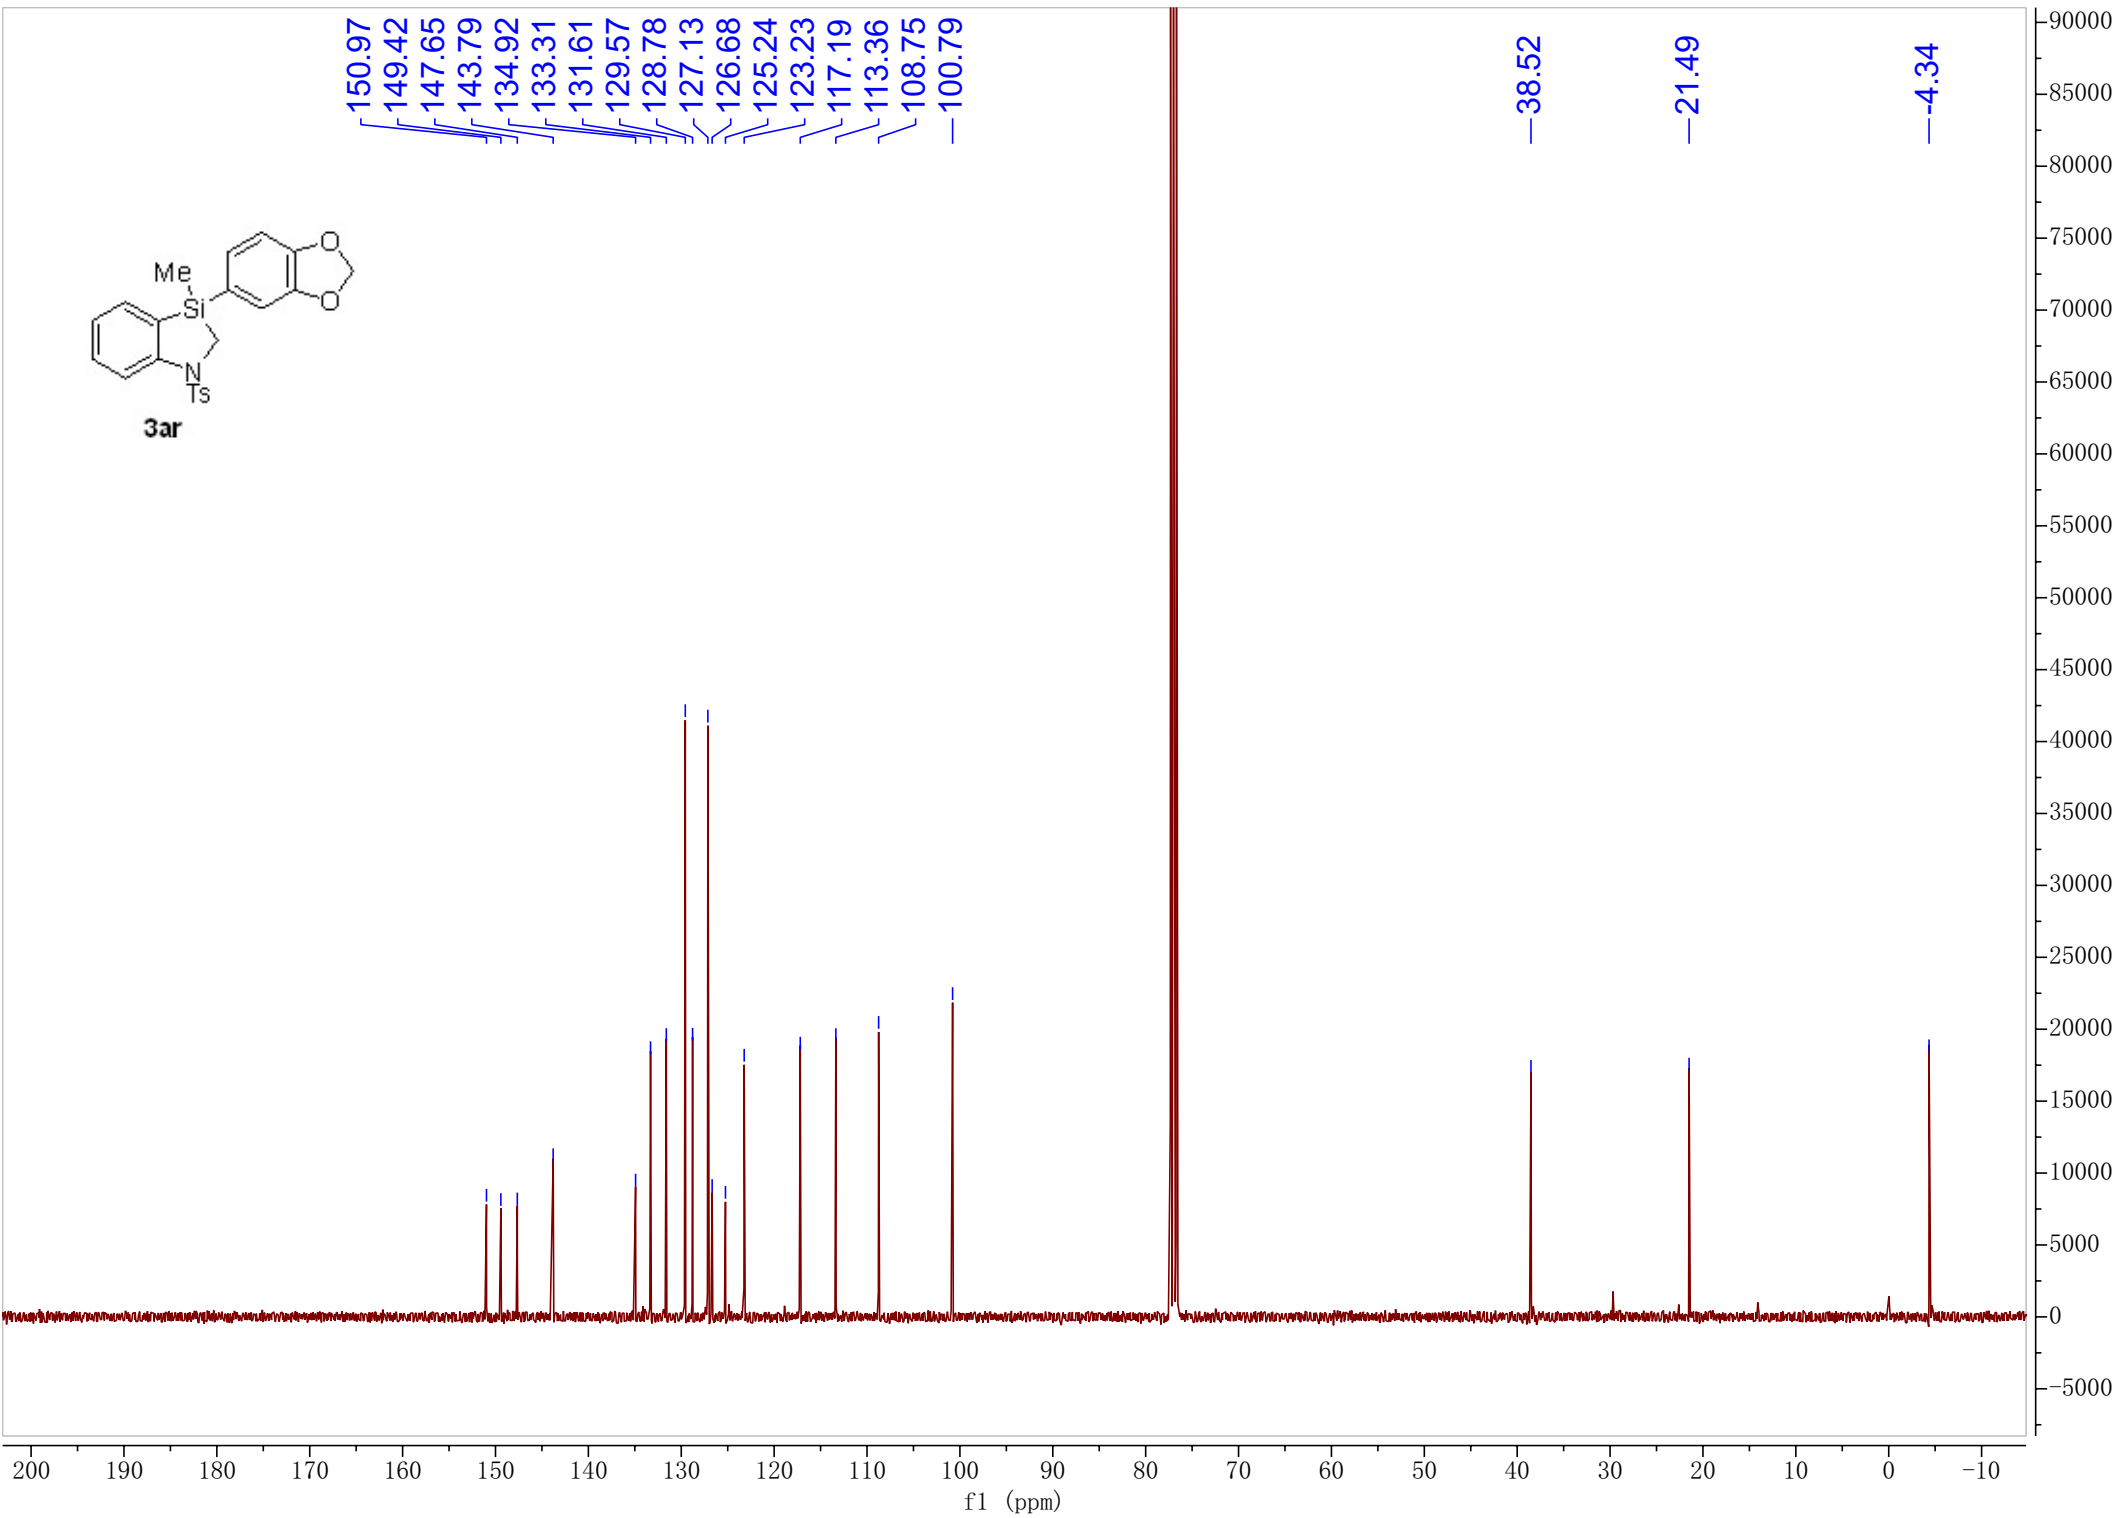

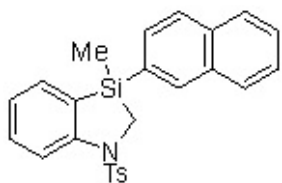

3as

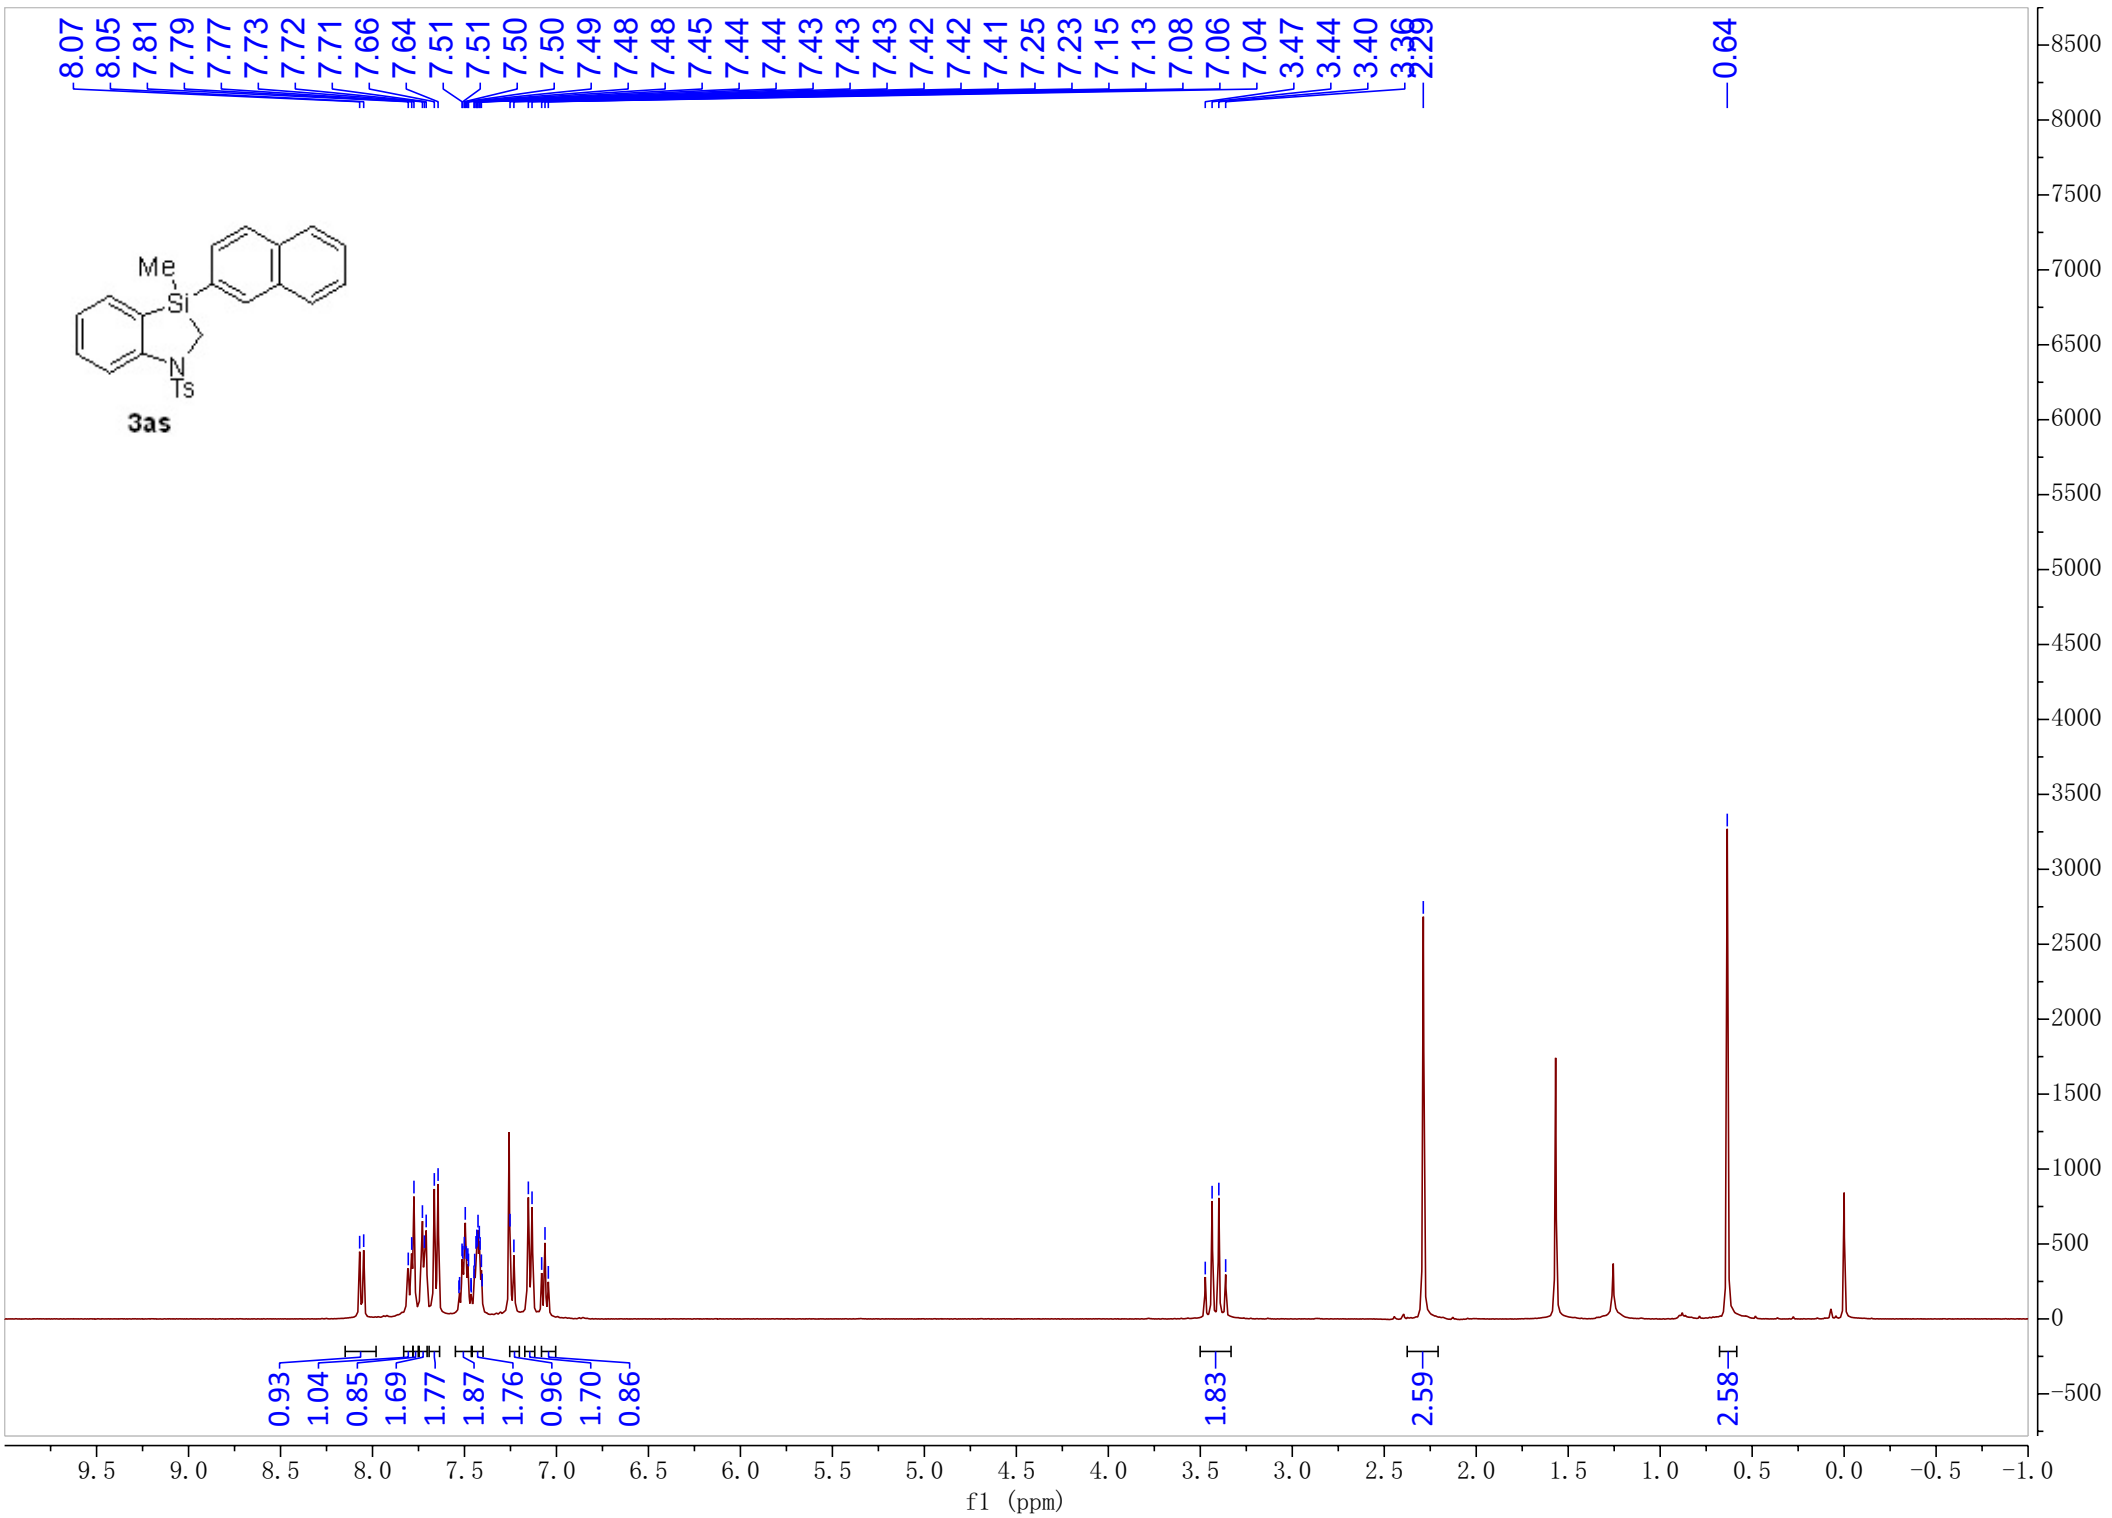

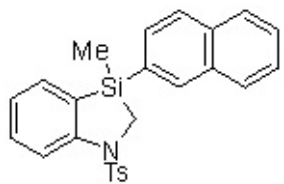

3as

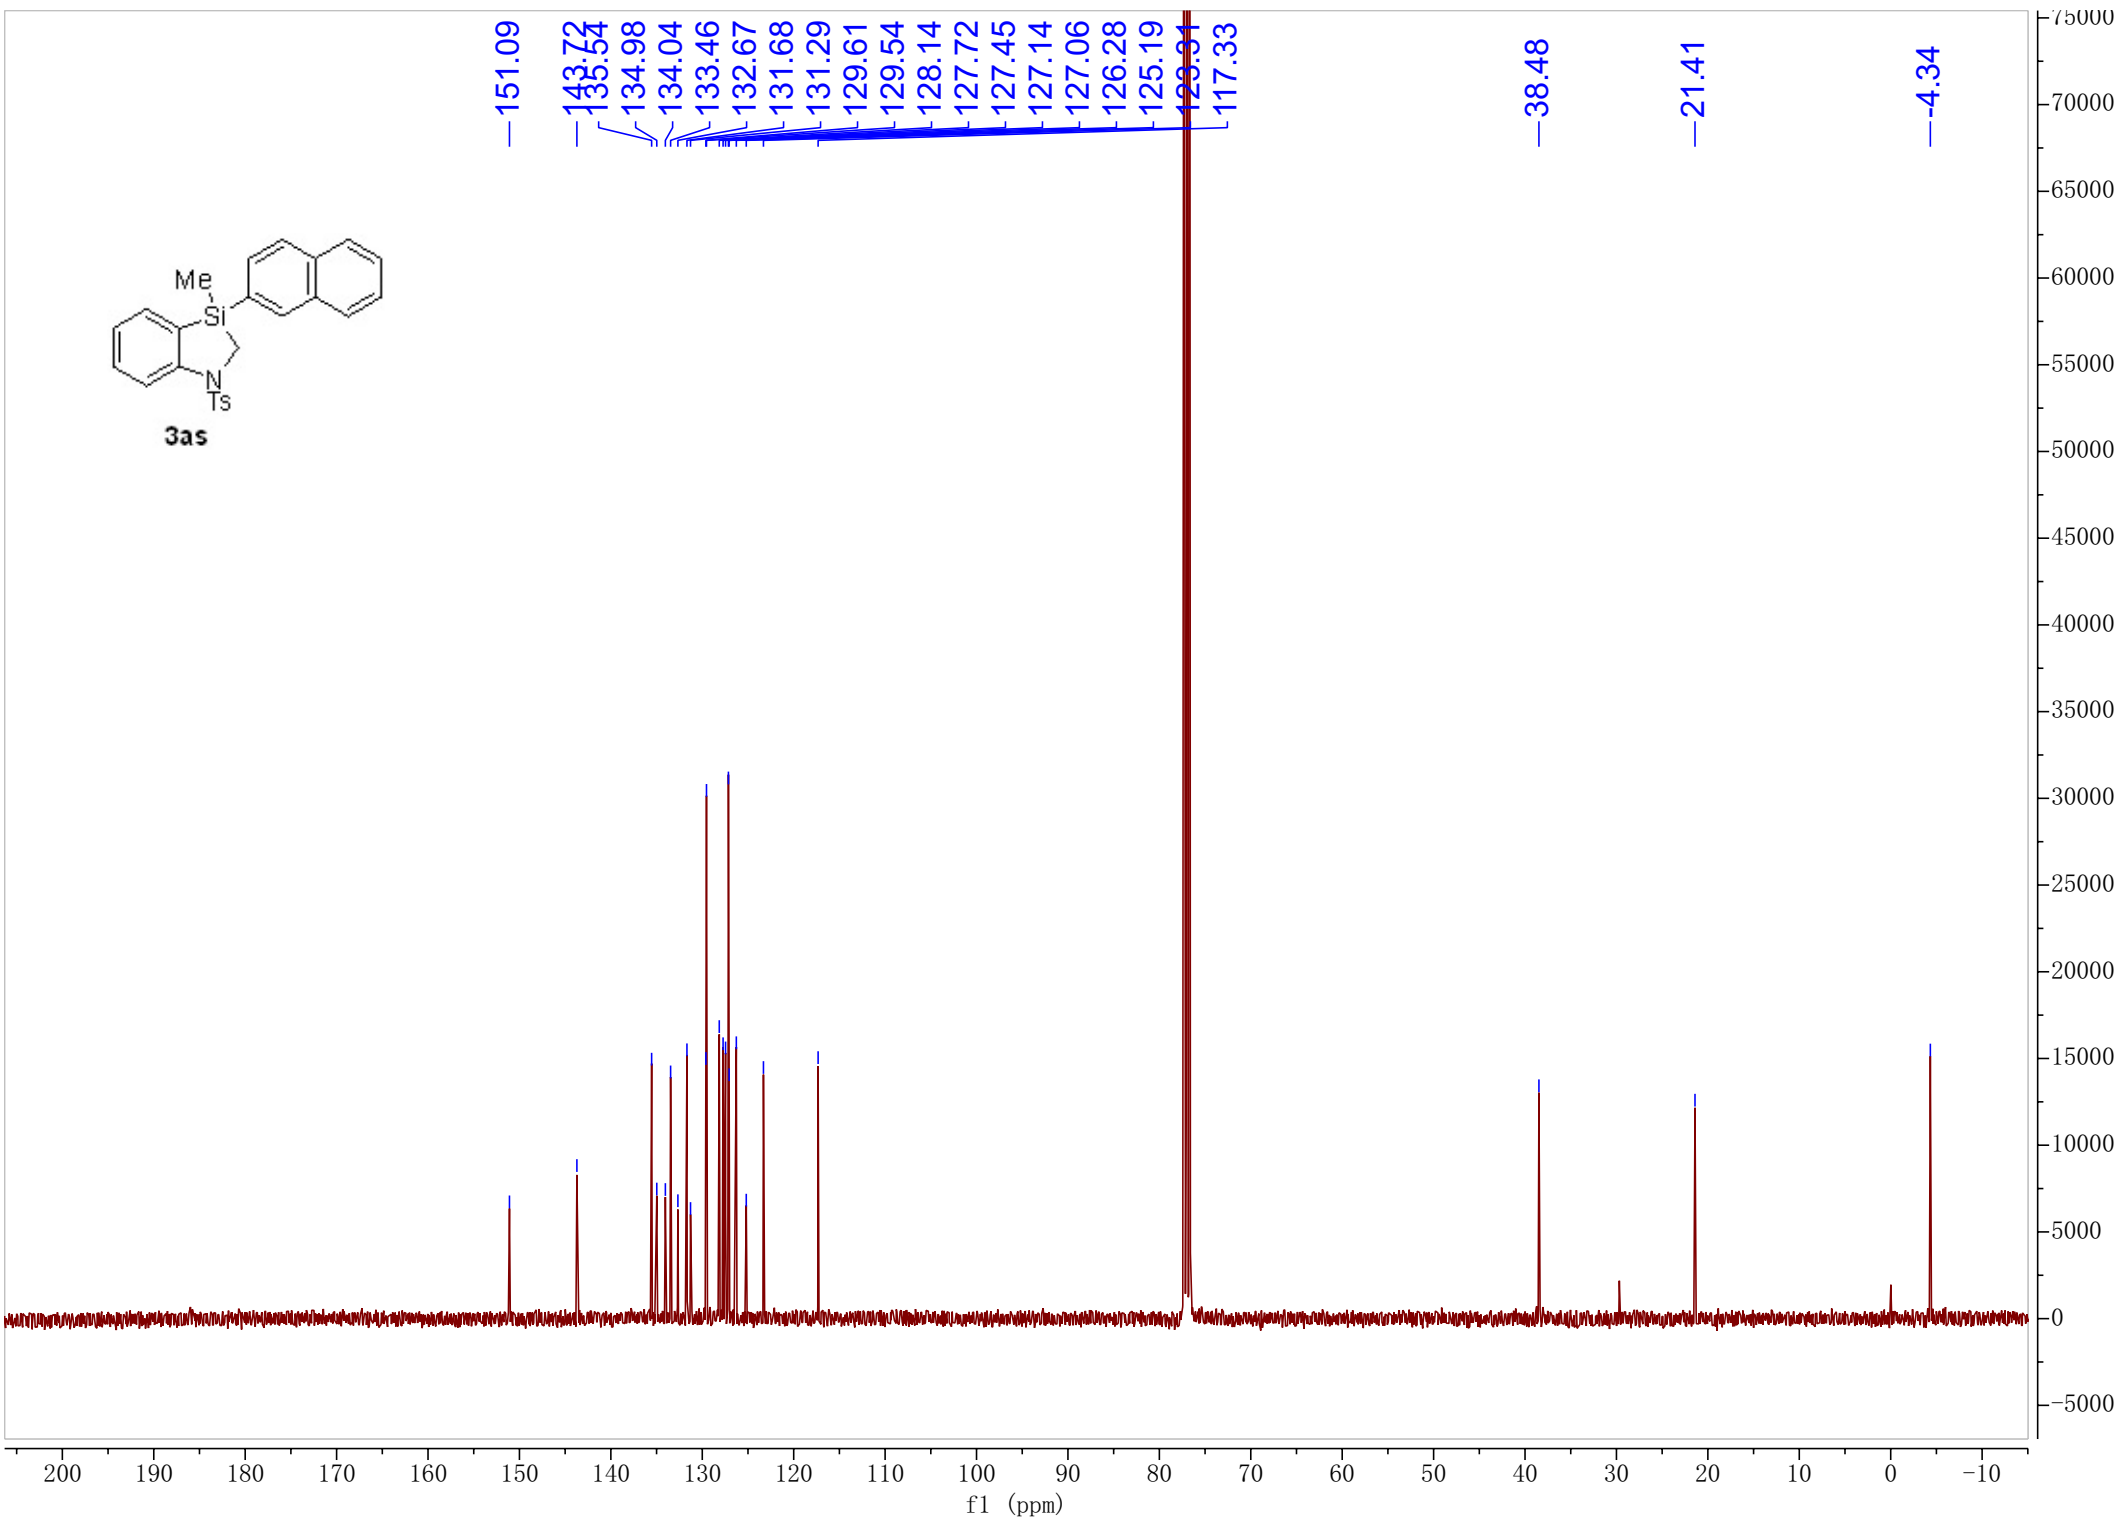

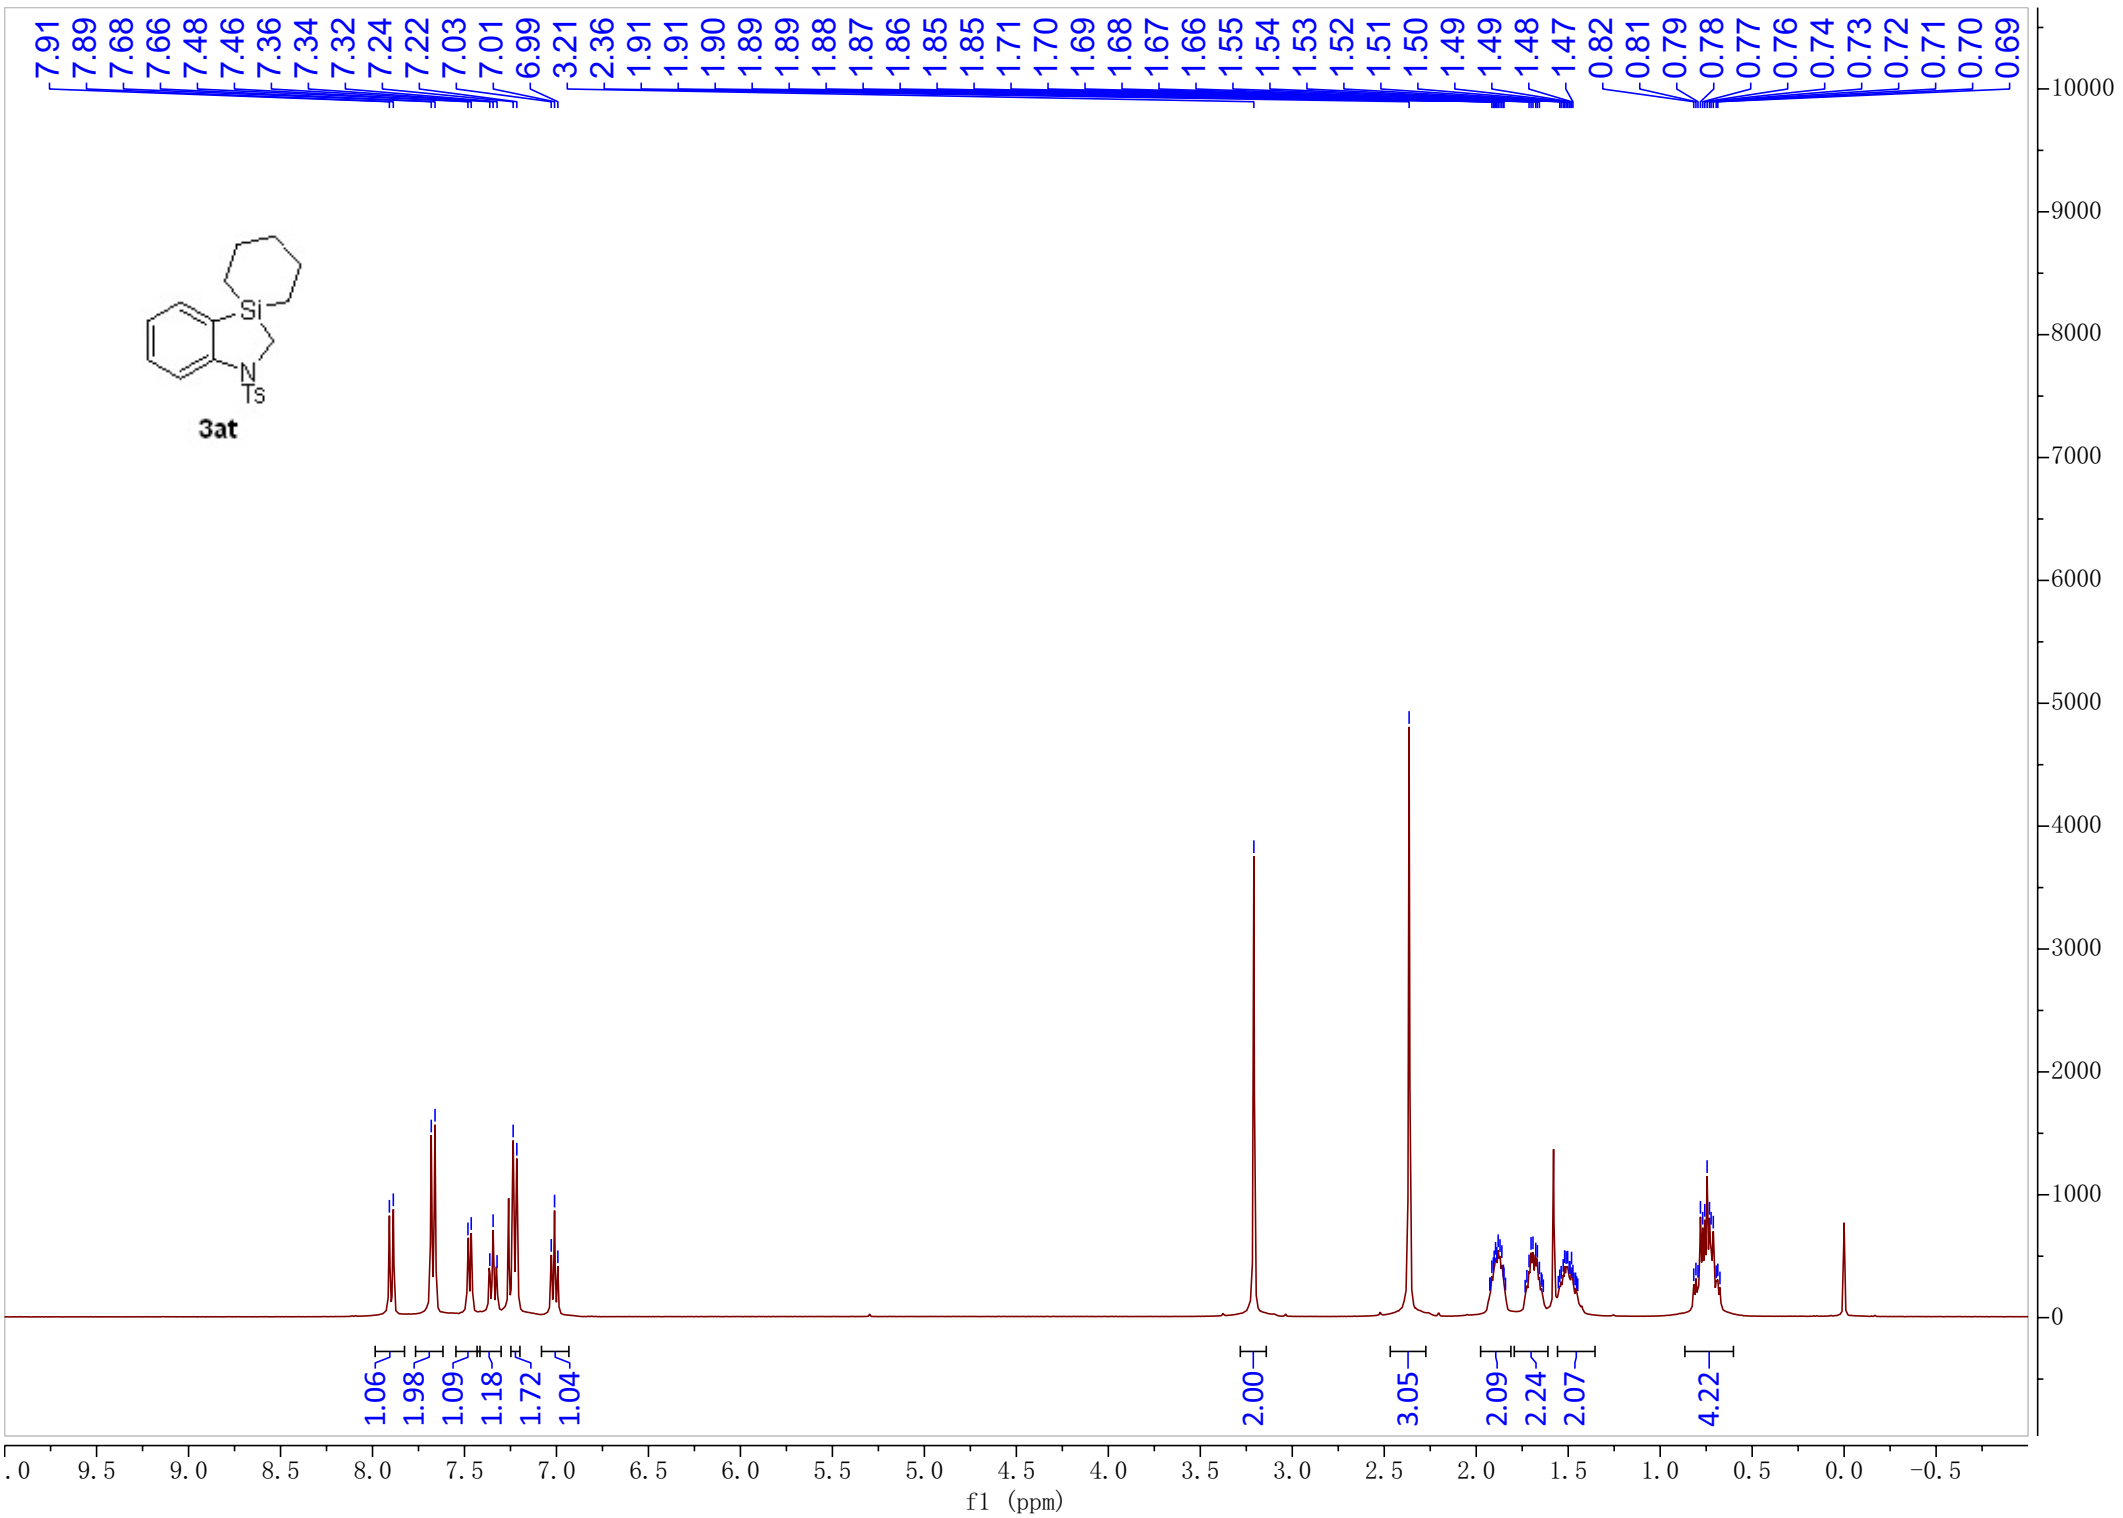

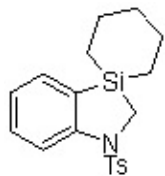

**3at**

— 150.60  
— 143.64  
/ 135.17  
/ 133.25  
— 131.34  
/ 129.54  
/ 127.09  
/ 126.06  
/ 122.76  
/ 116.91

— 36.68  
~ 29.20  
~ 24.90  
~ 21.48  
— 12.19

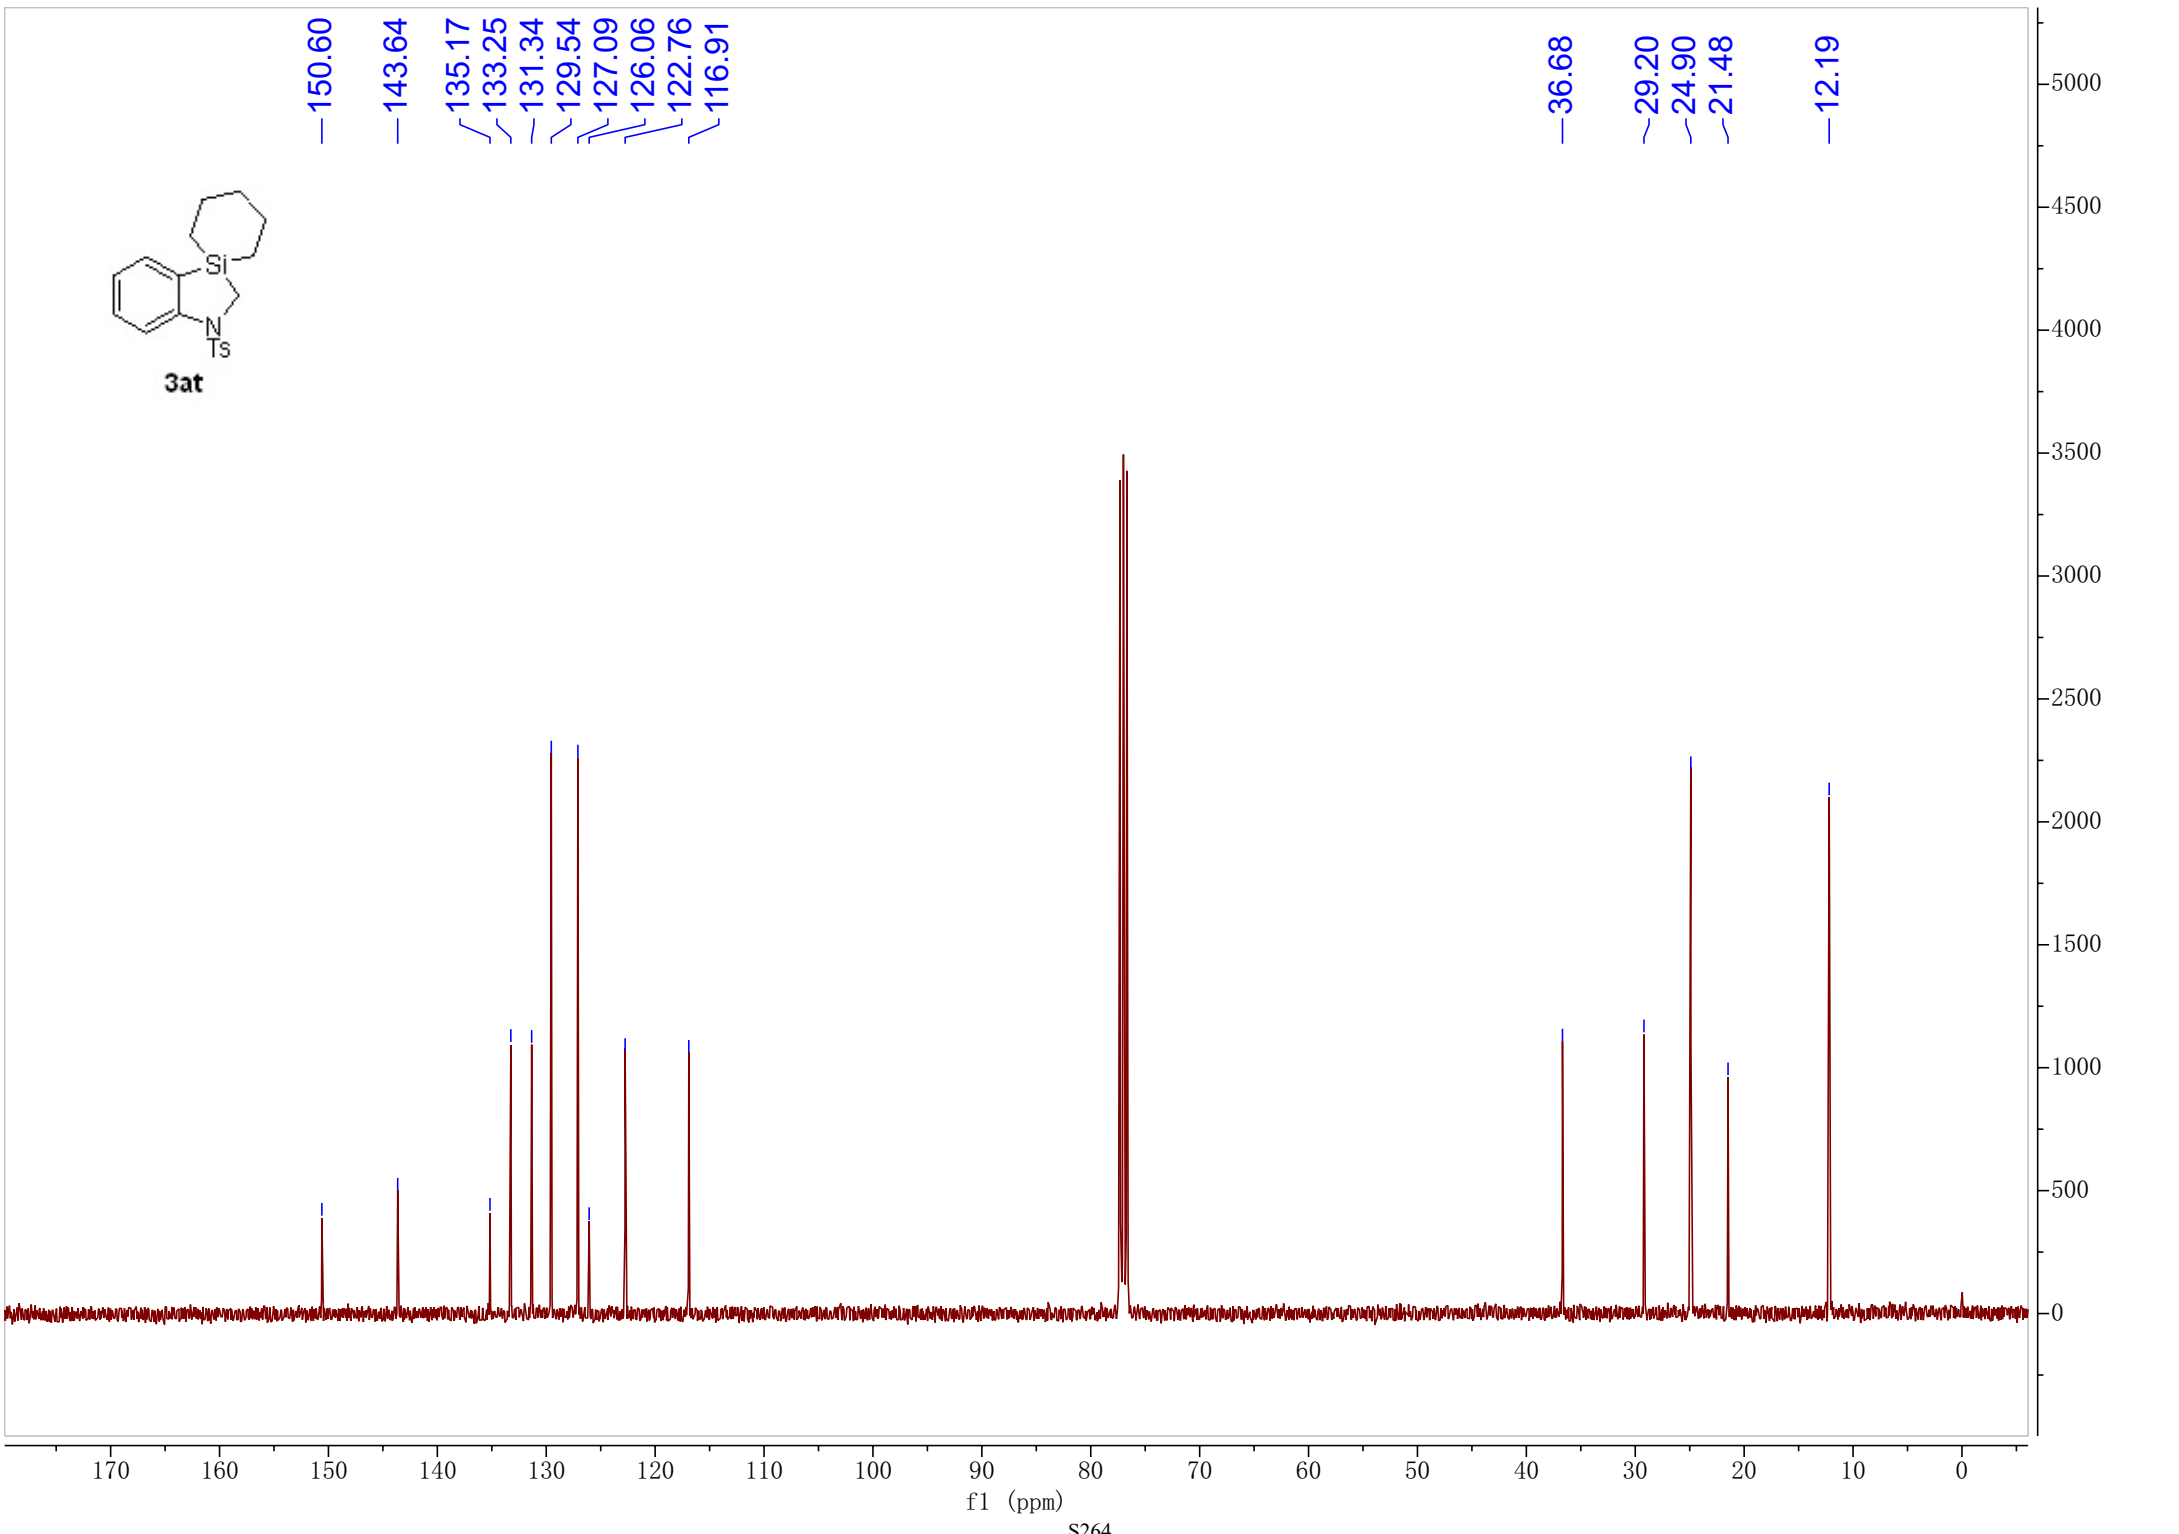



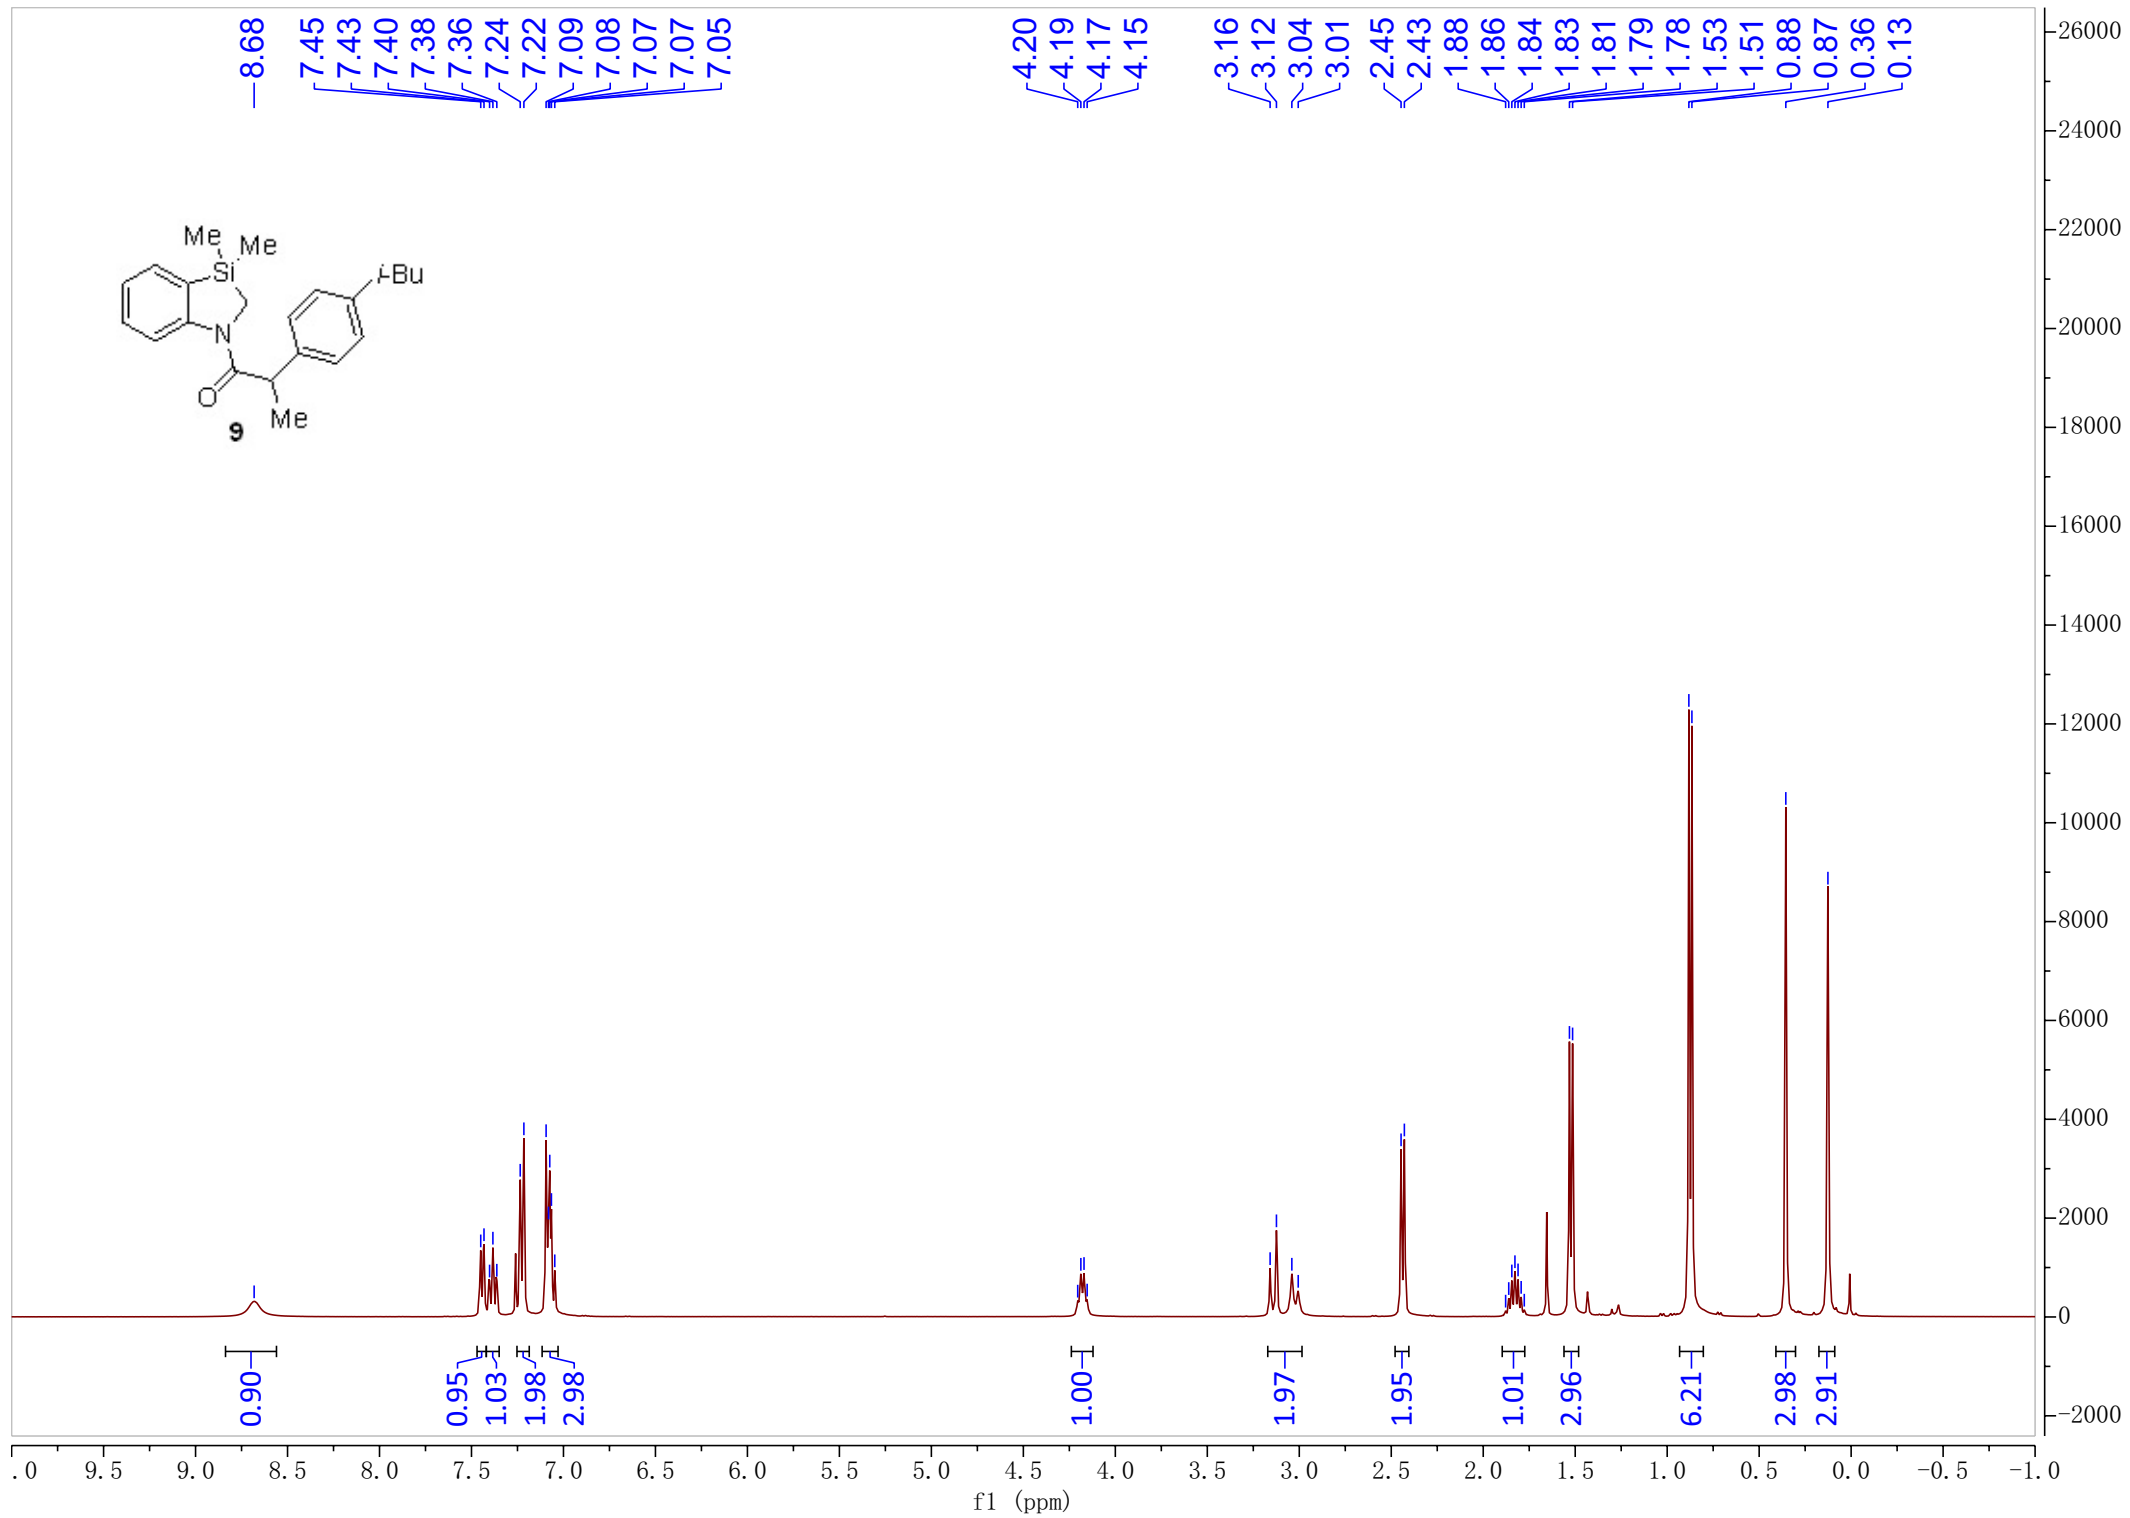

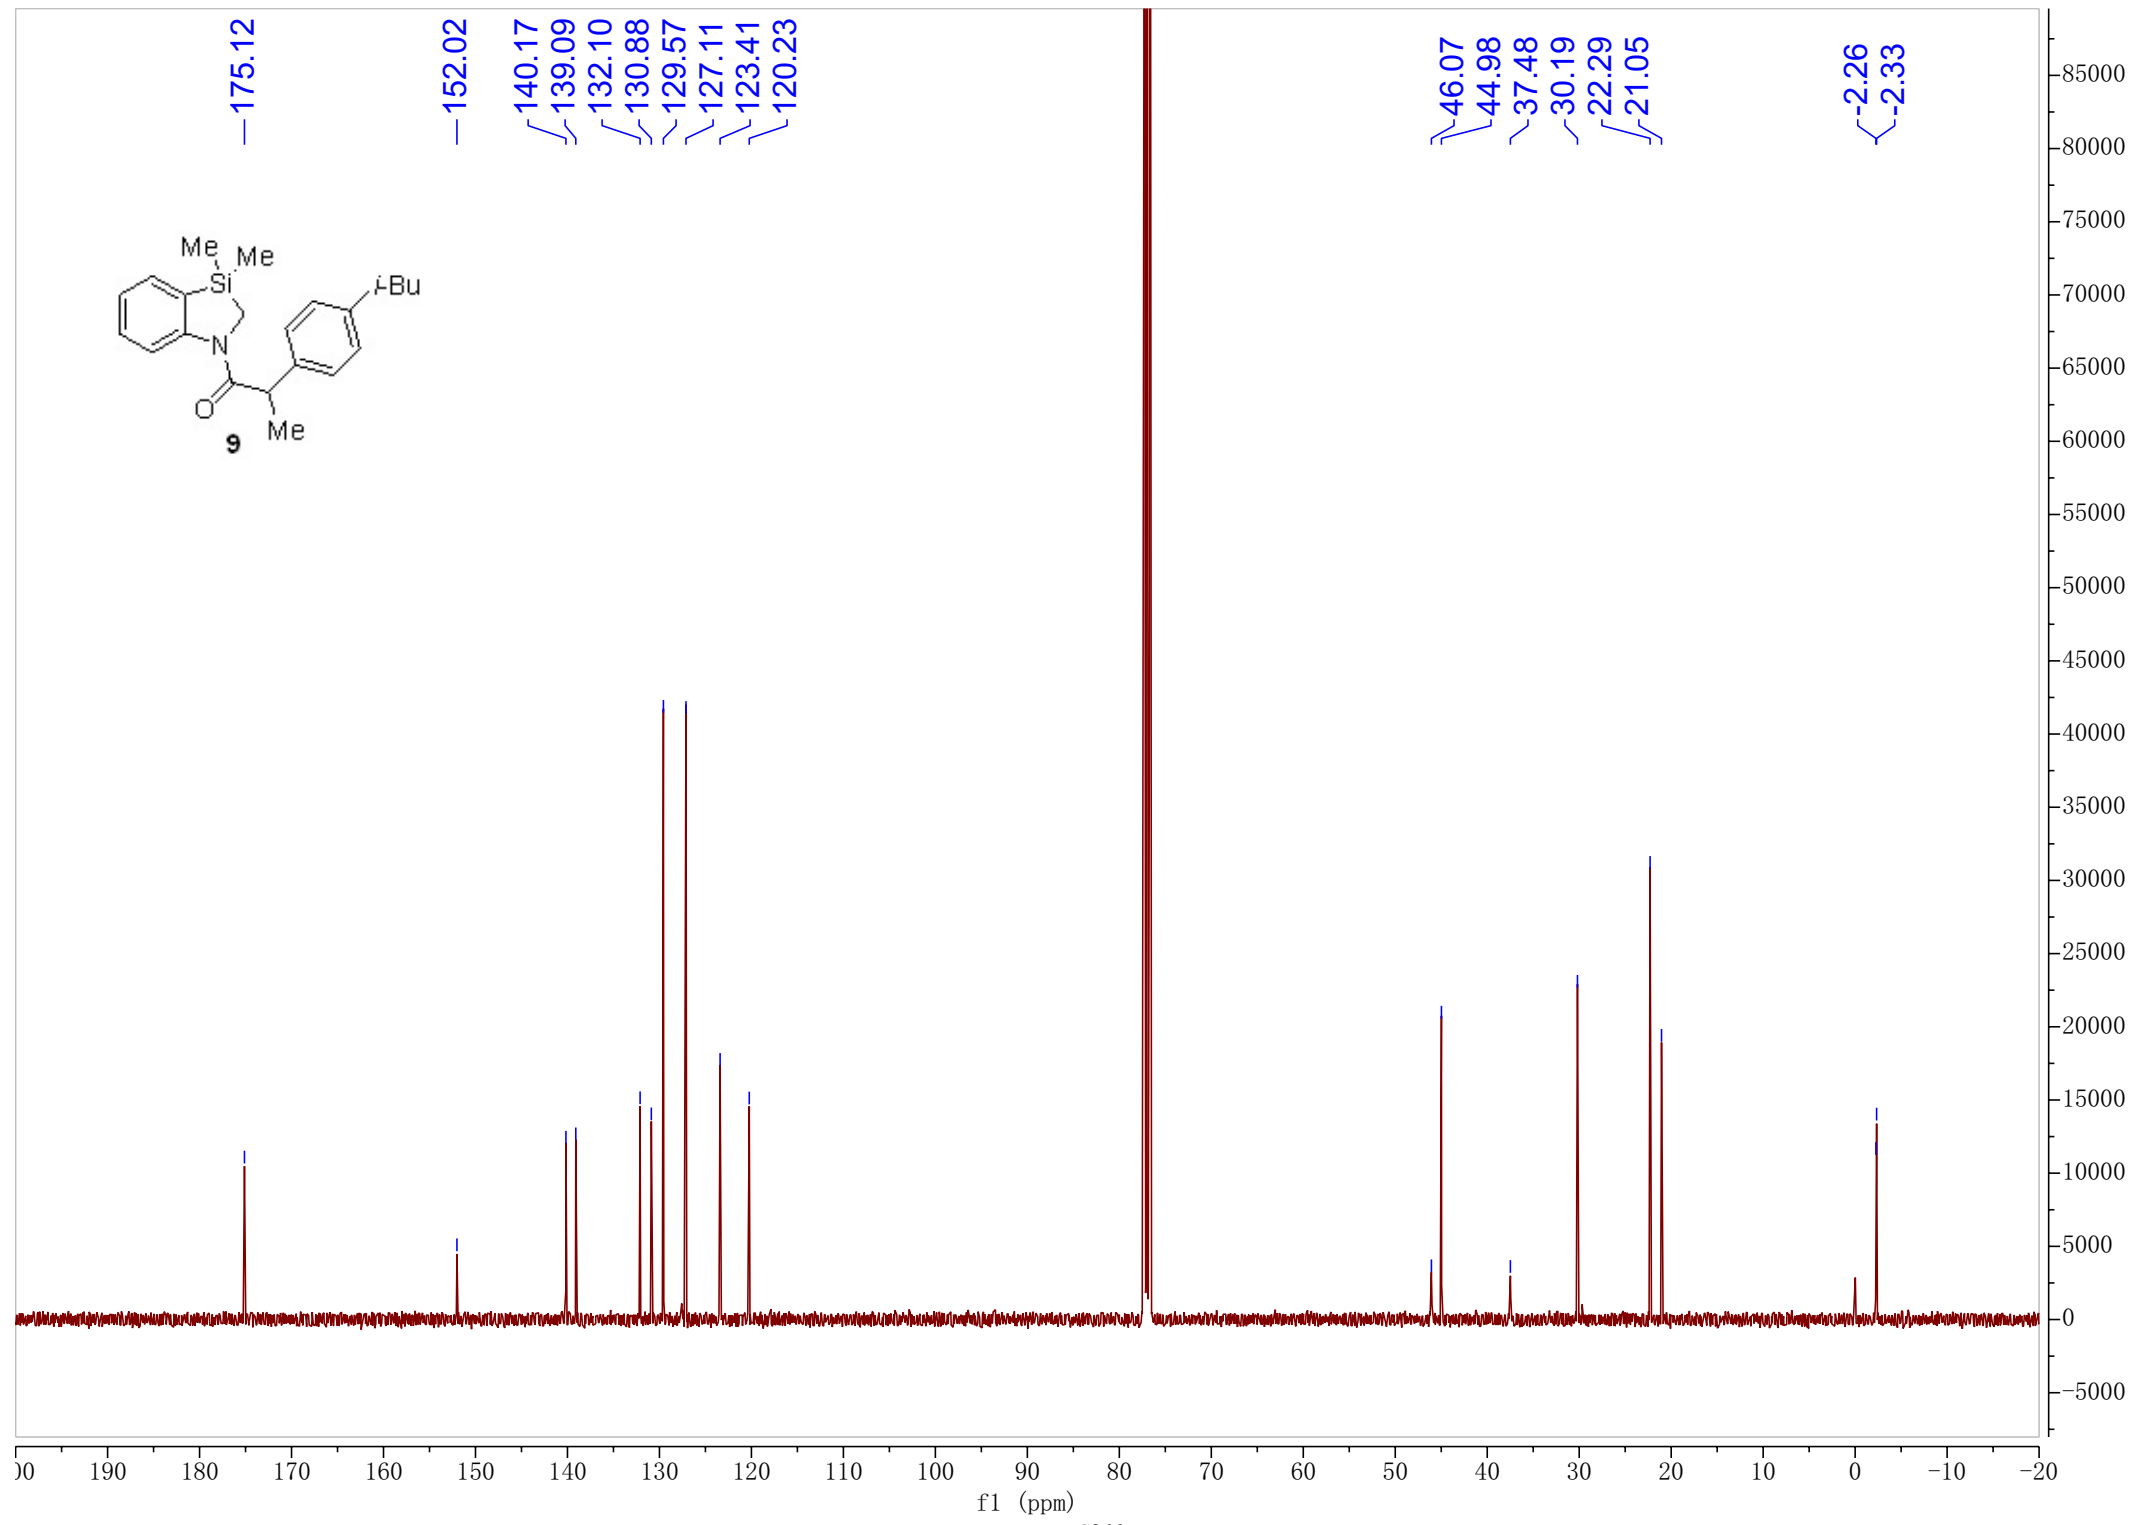

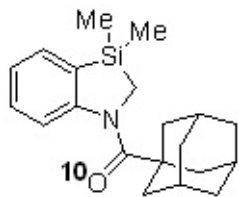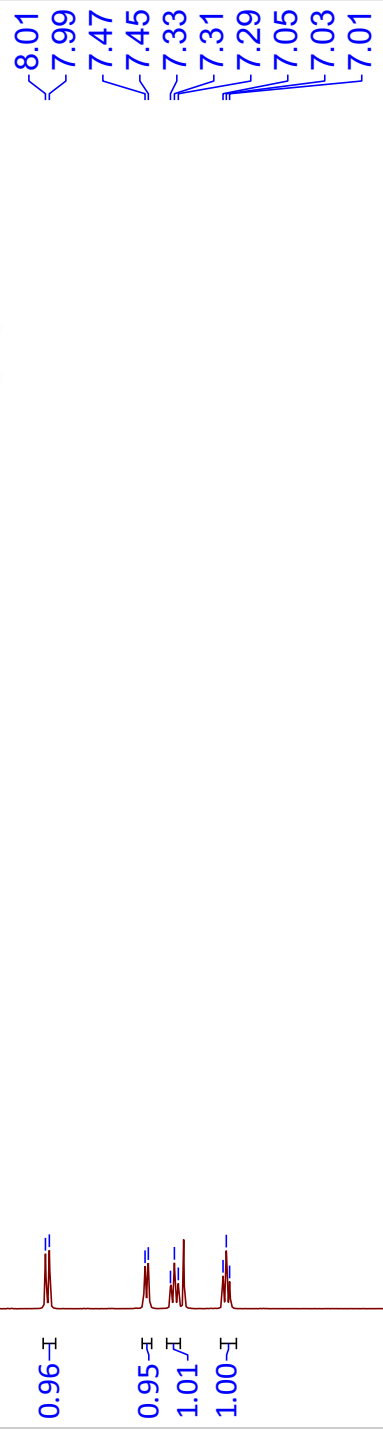

f1 (ppm)

S267

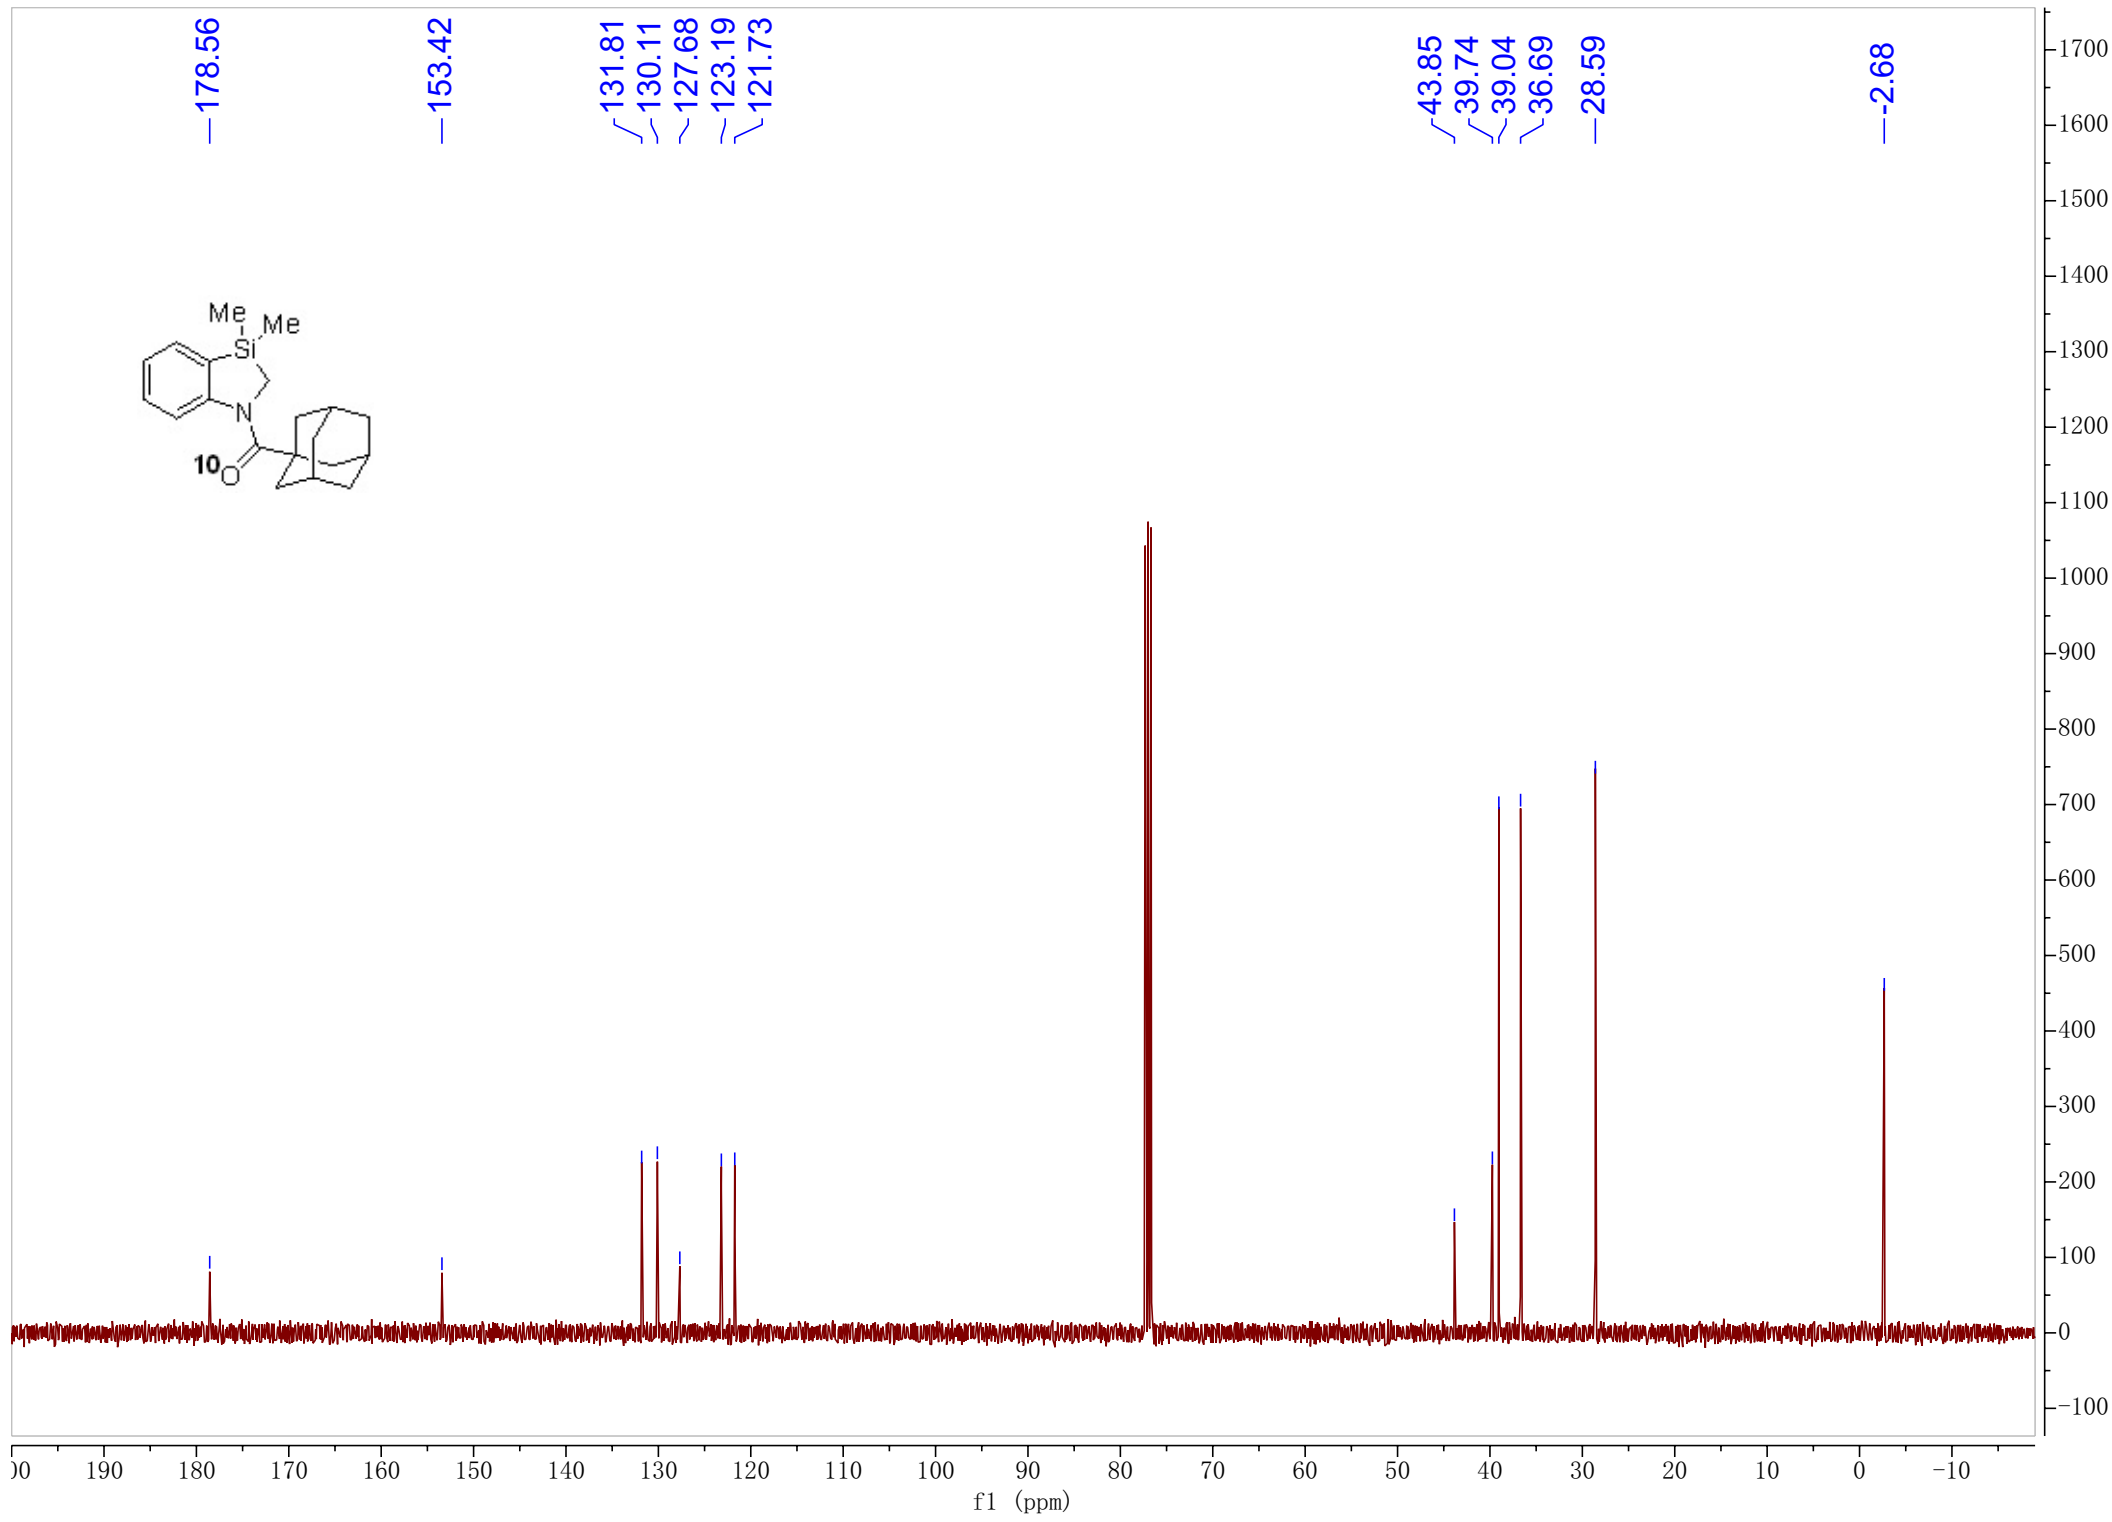

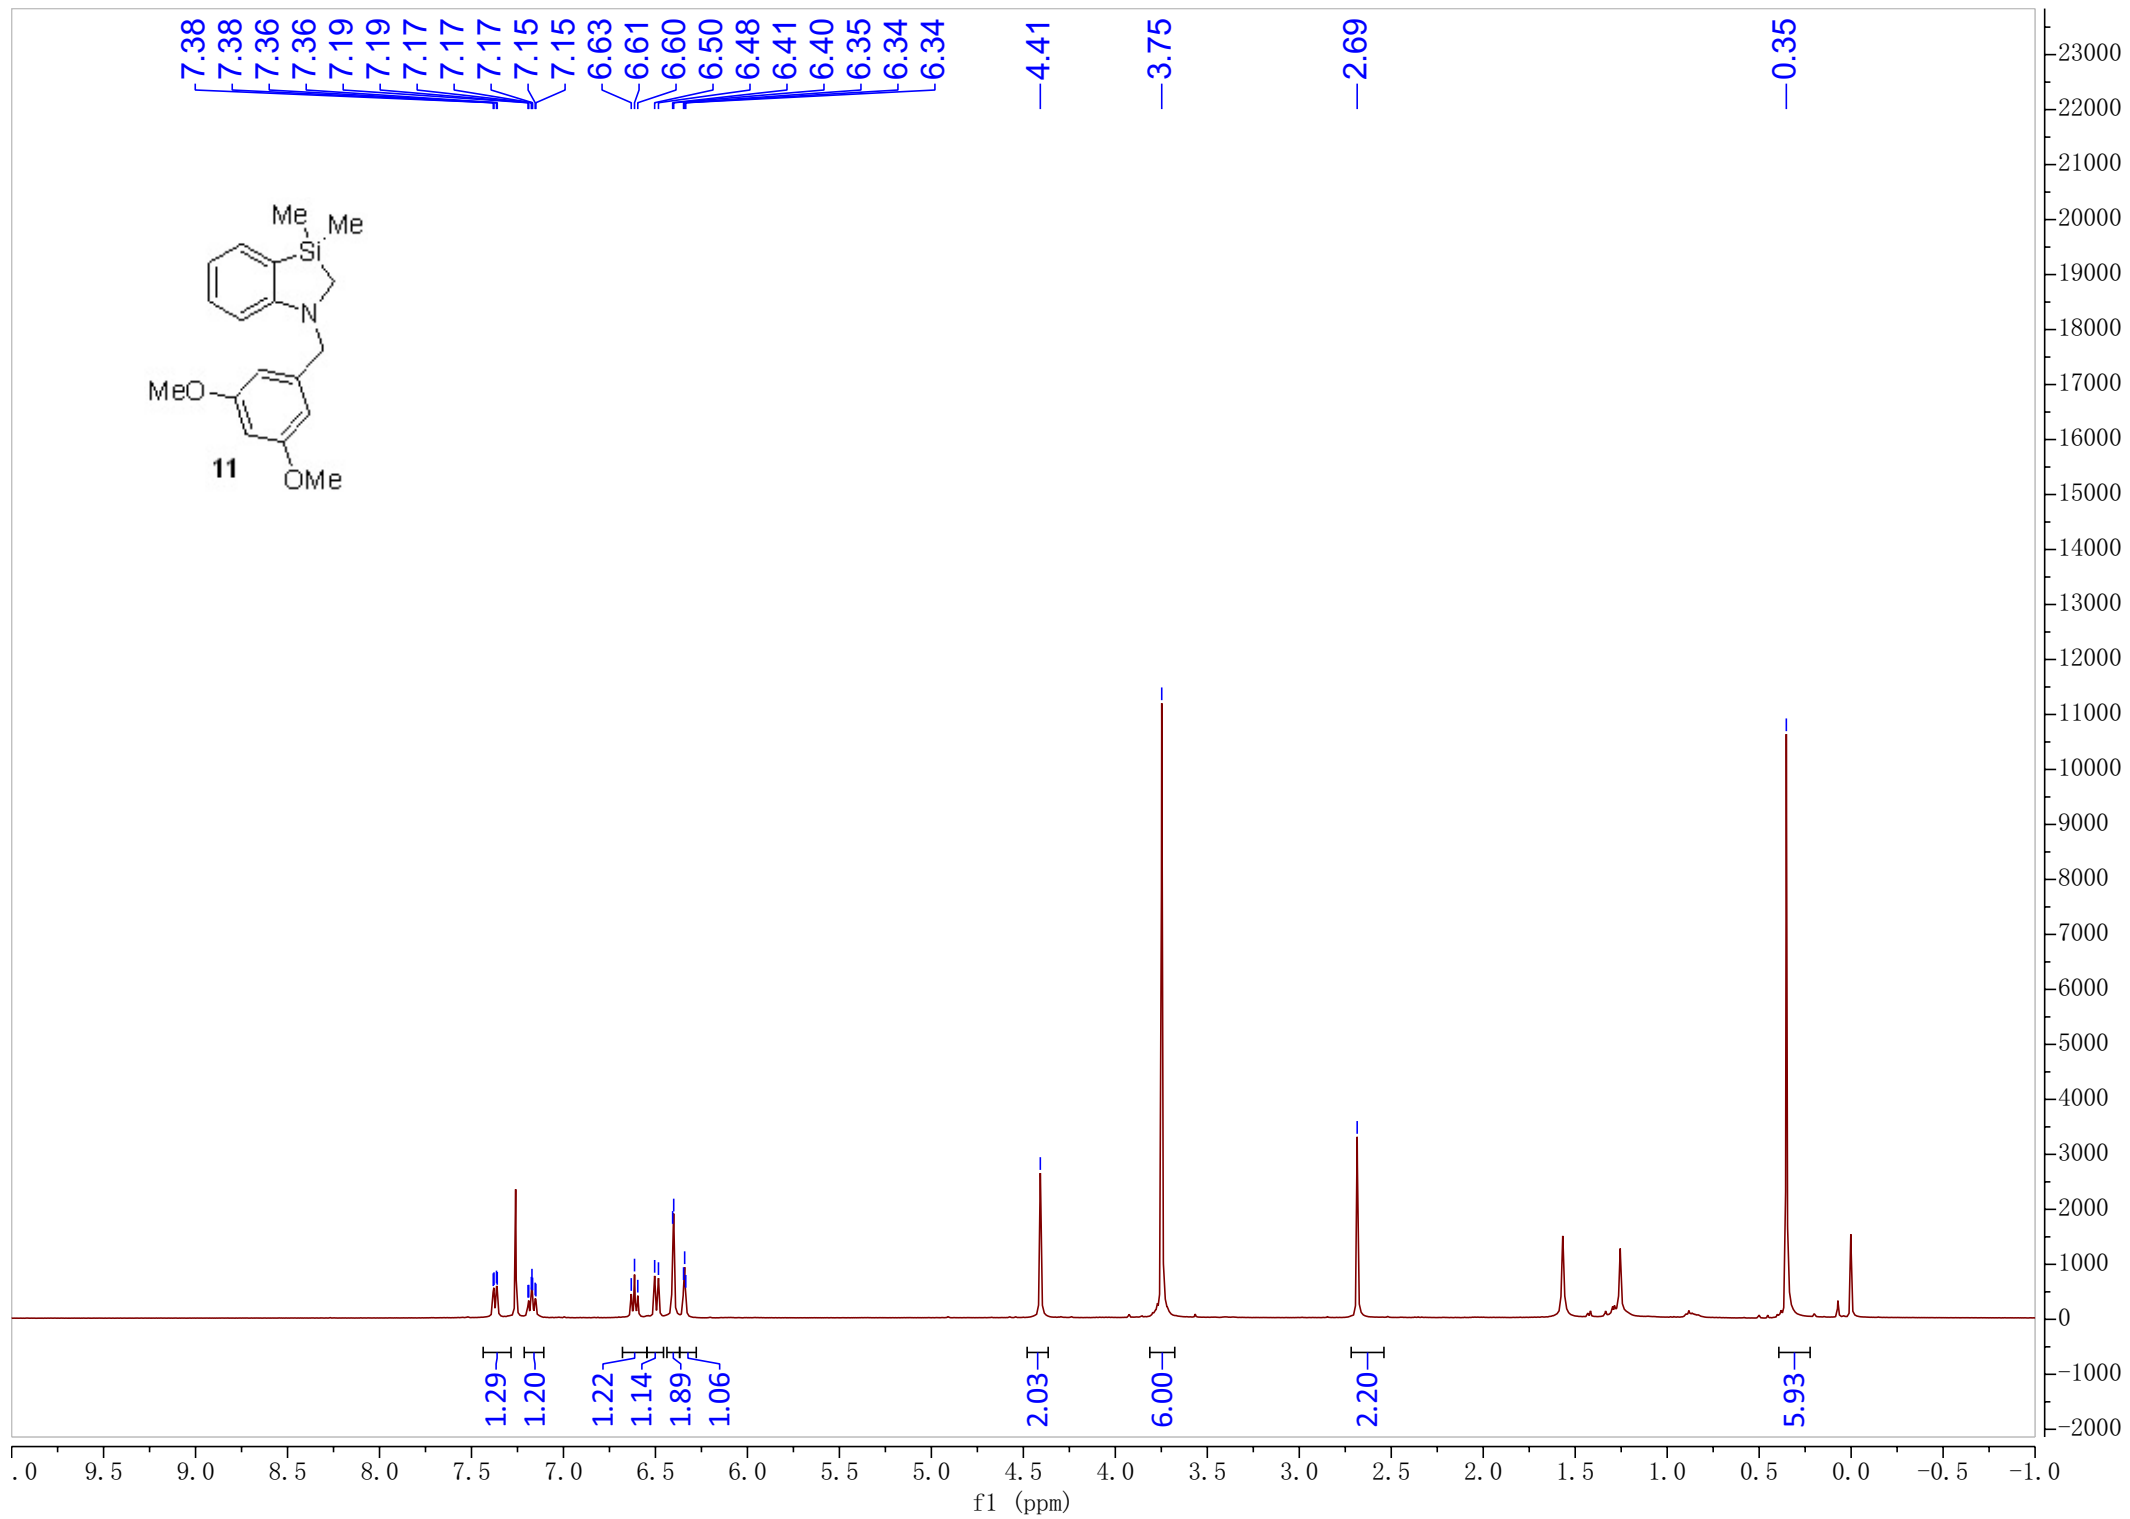

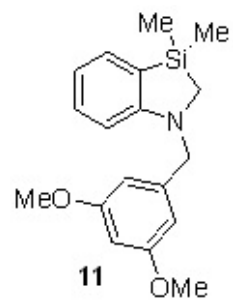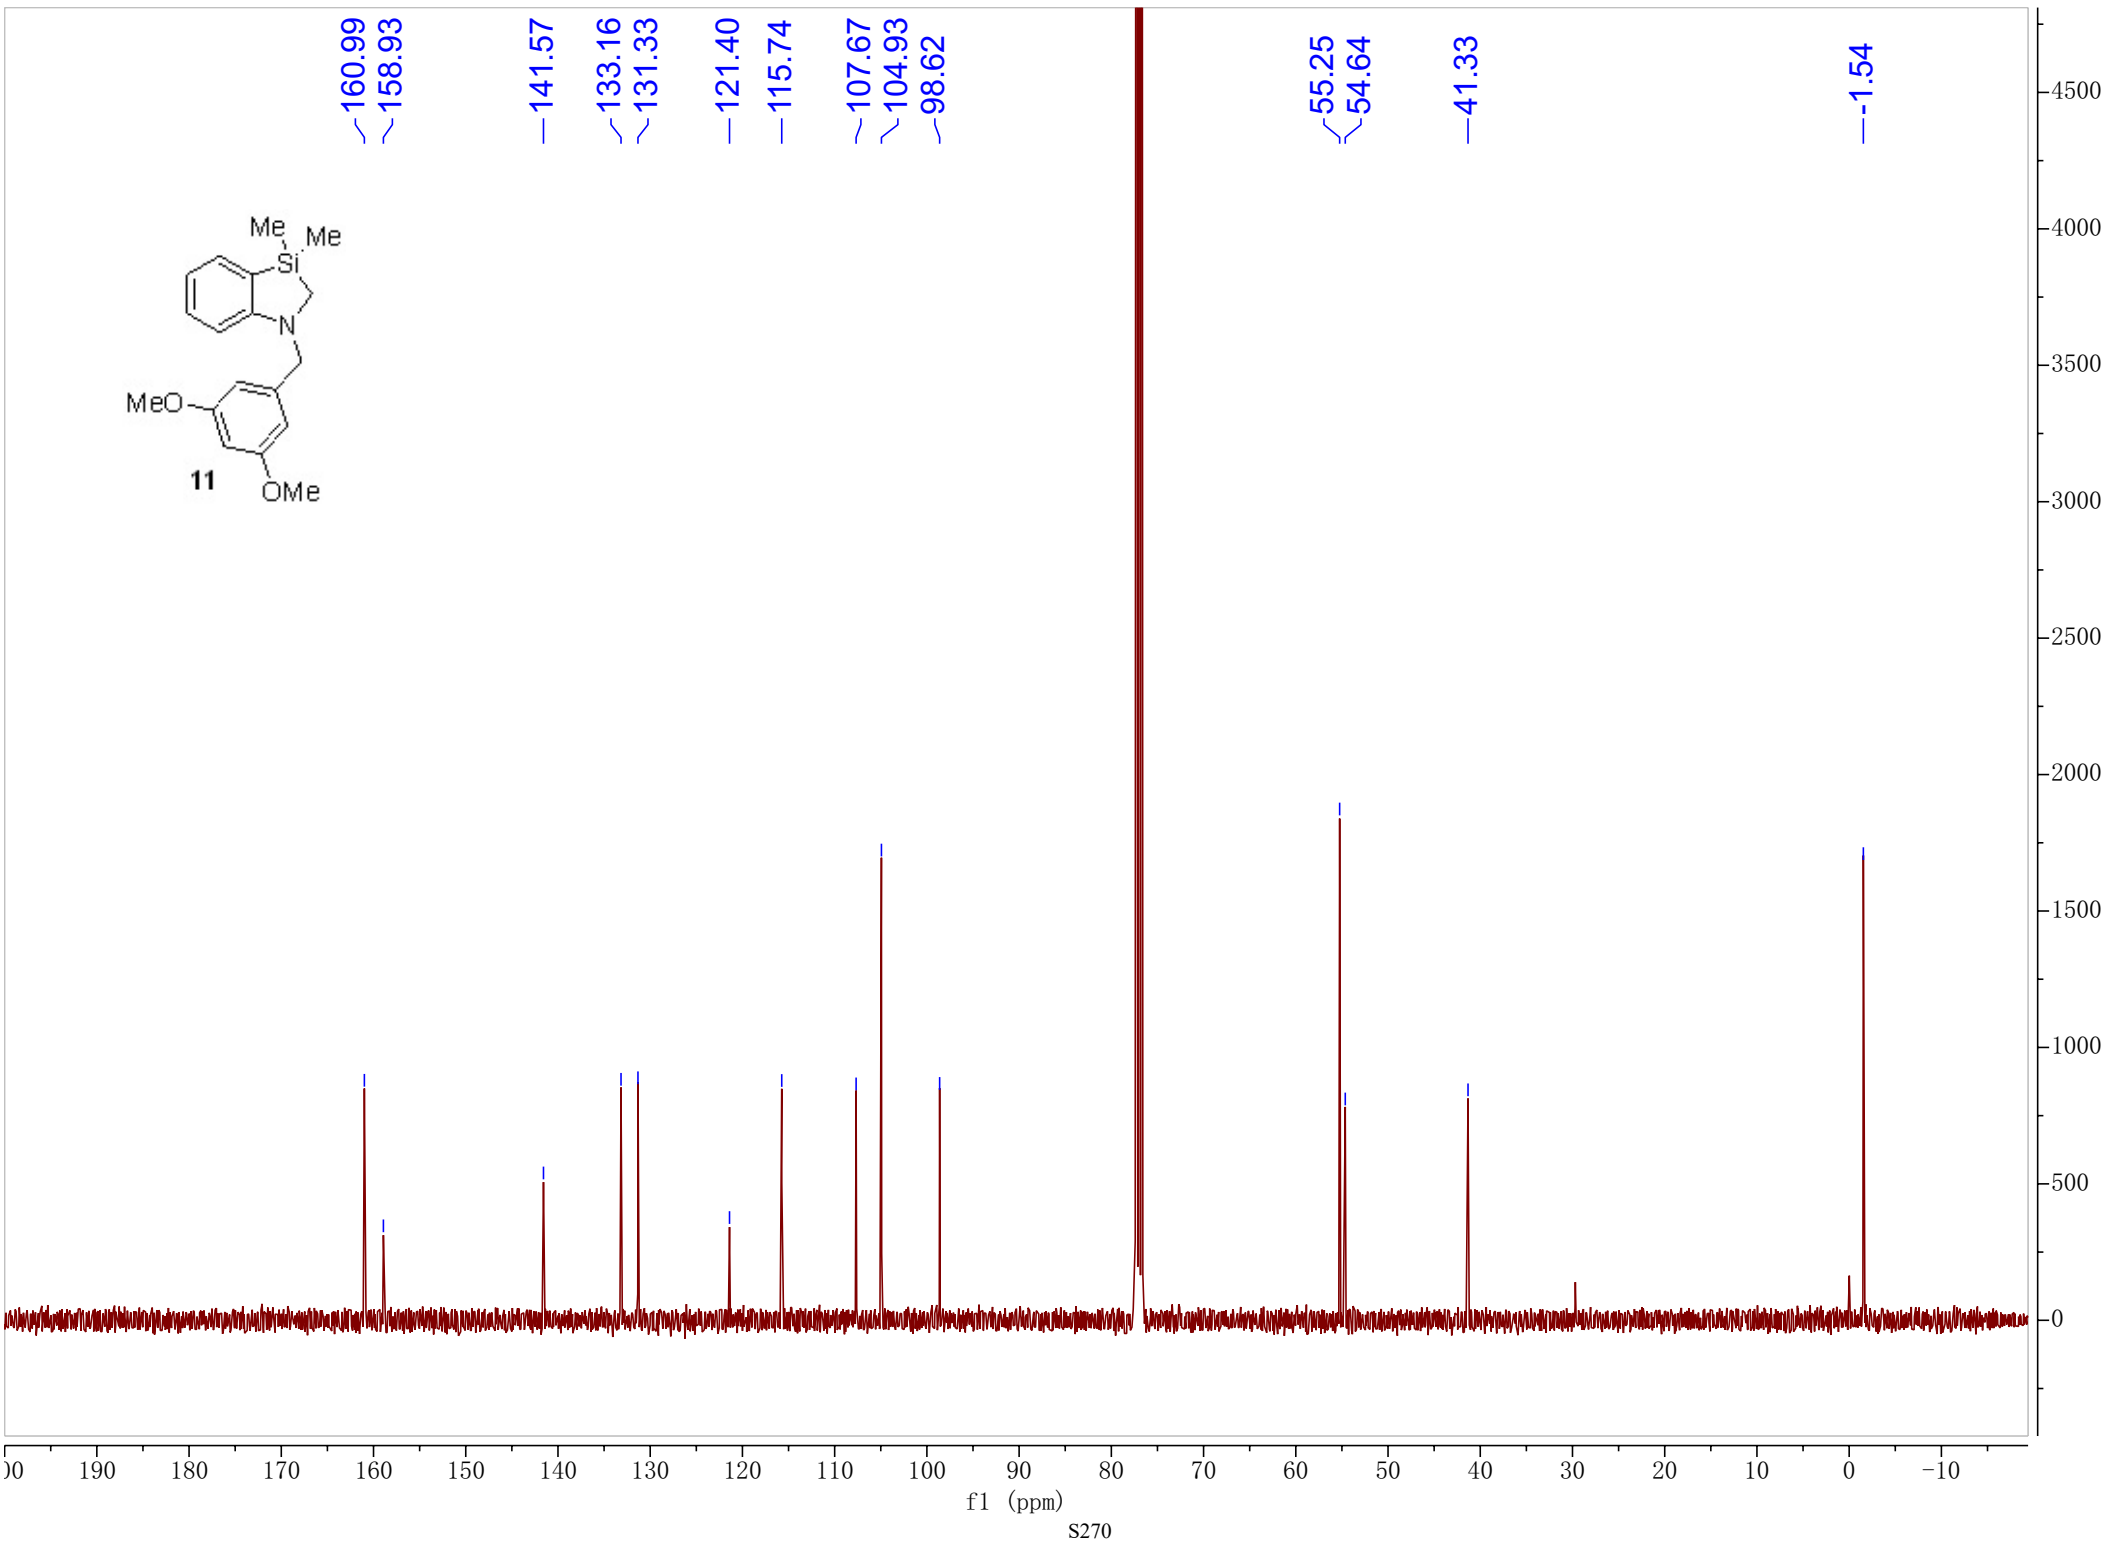

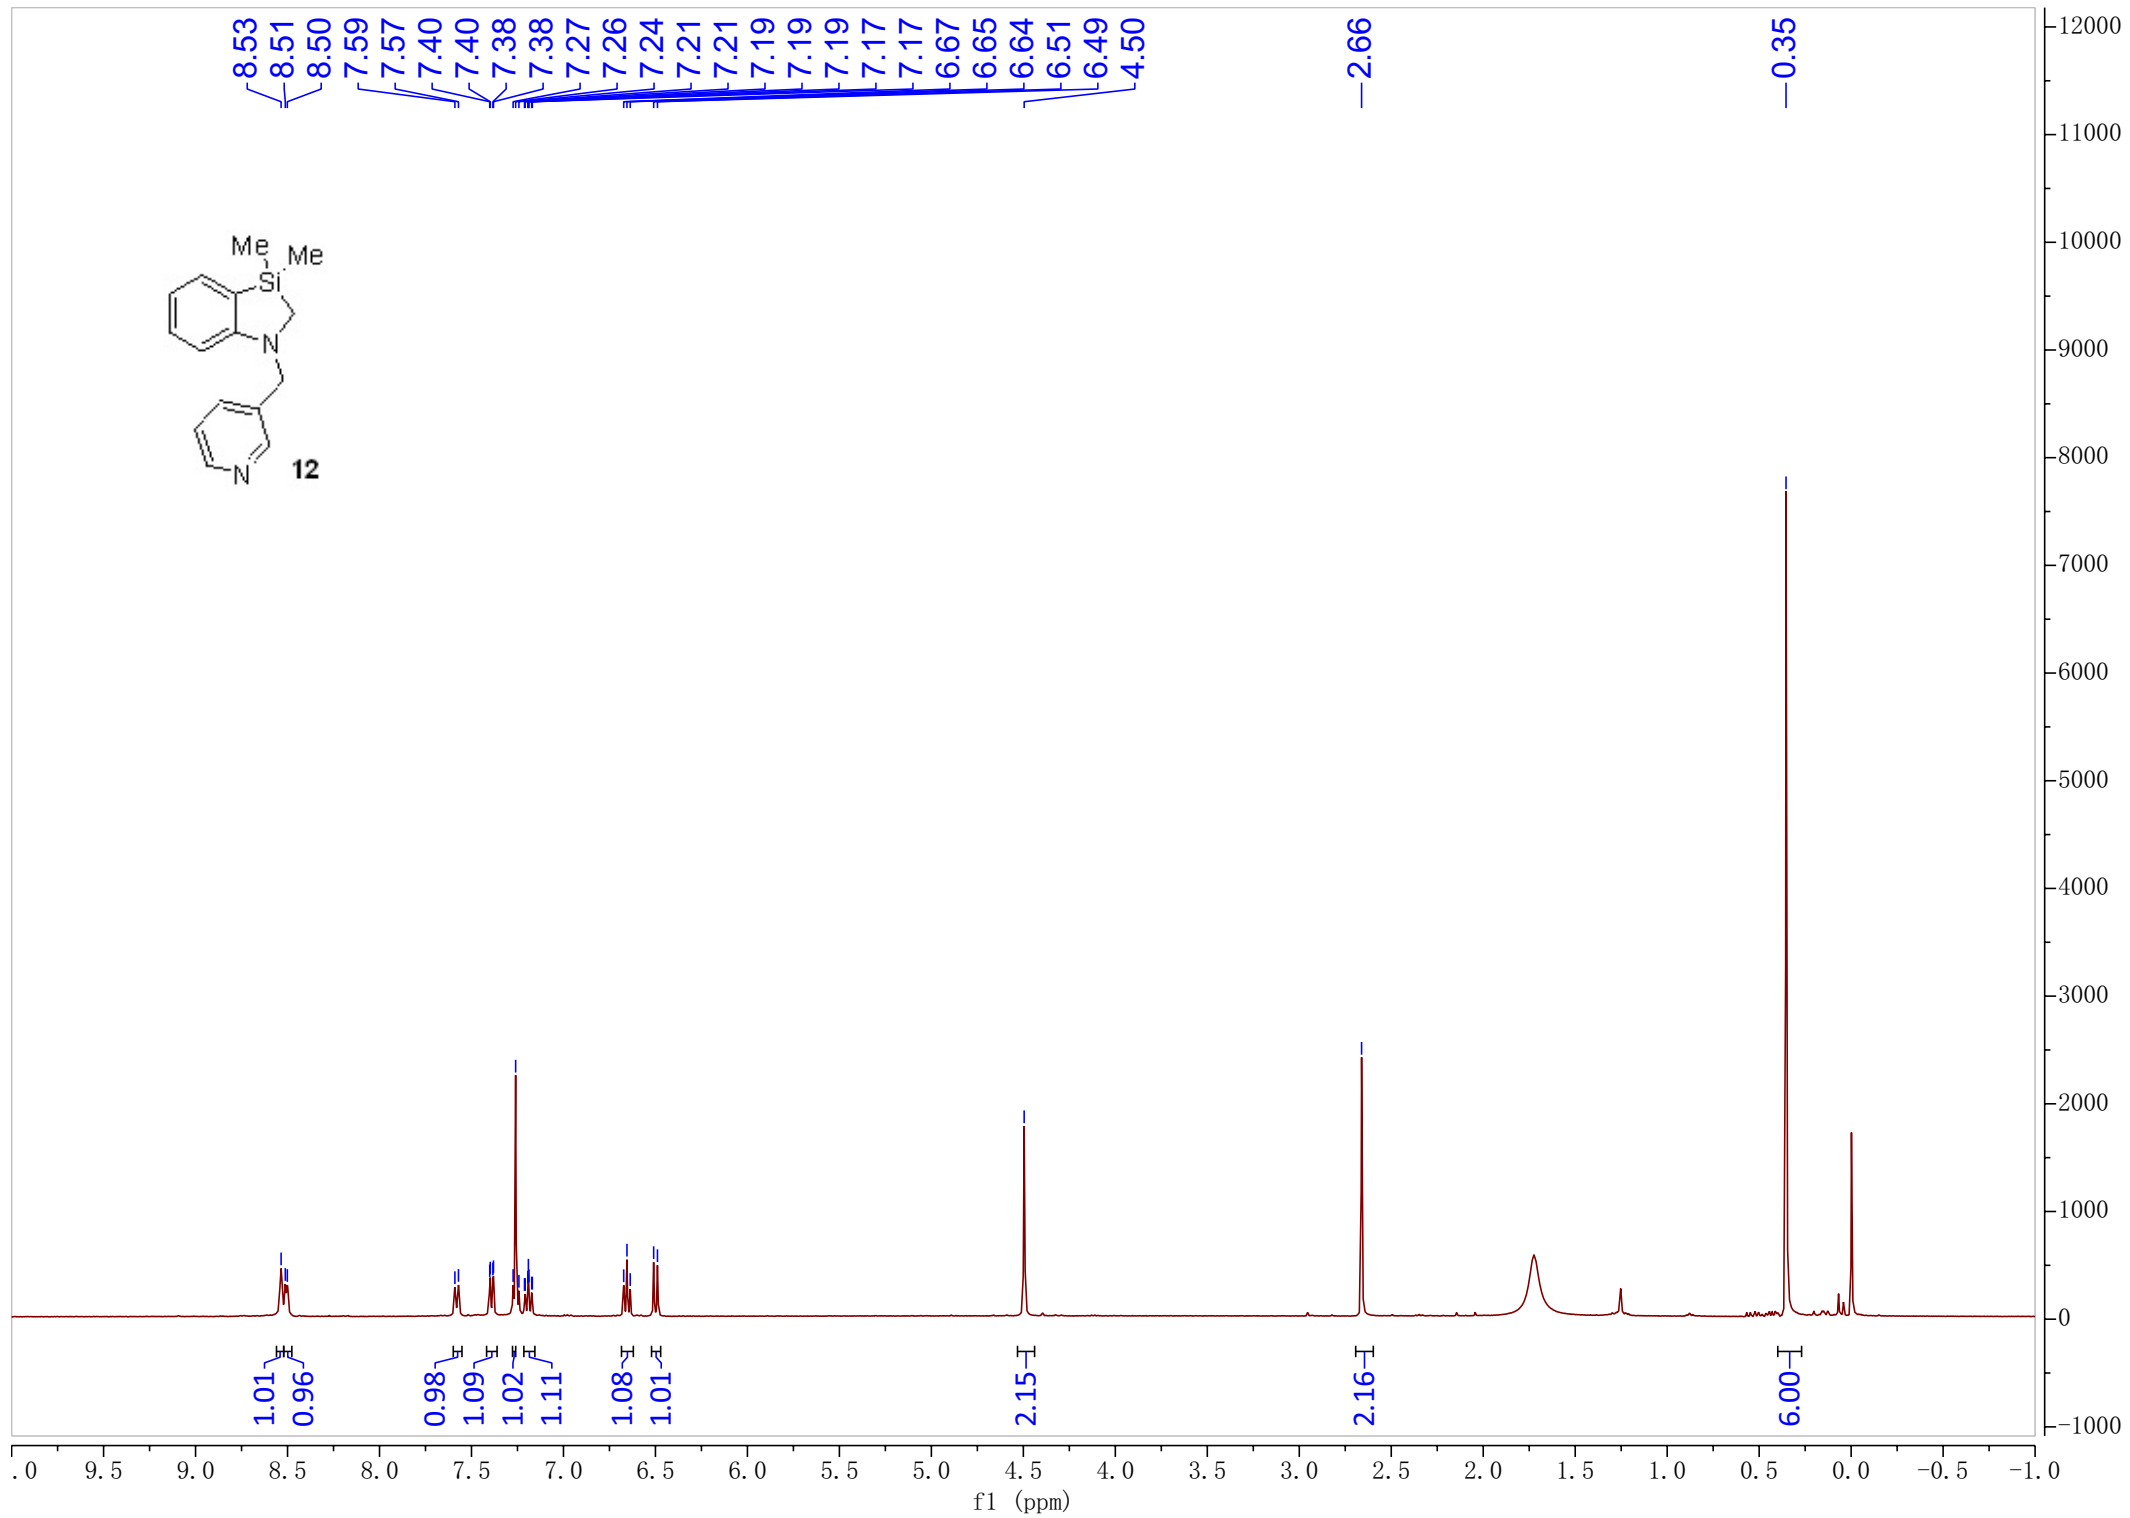

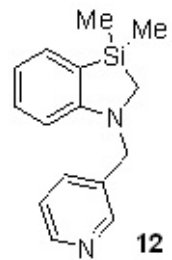

158.29  
147.50  
146.83  
136.46  
135.27  
133.43  
131.41  
124.03  
121.81  
116.48  
107.52

52.18

41.42

-1.63

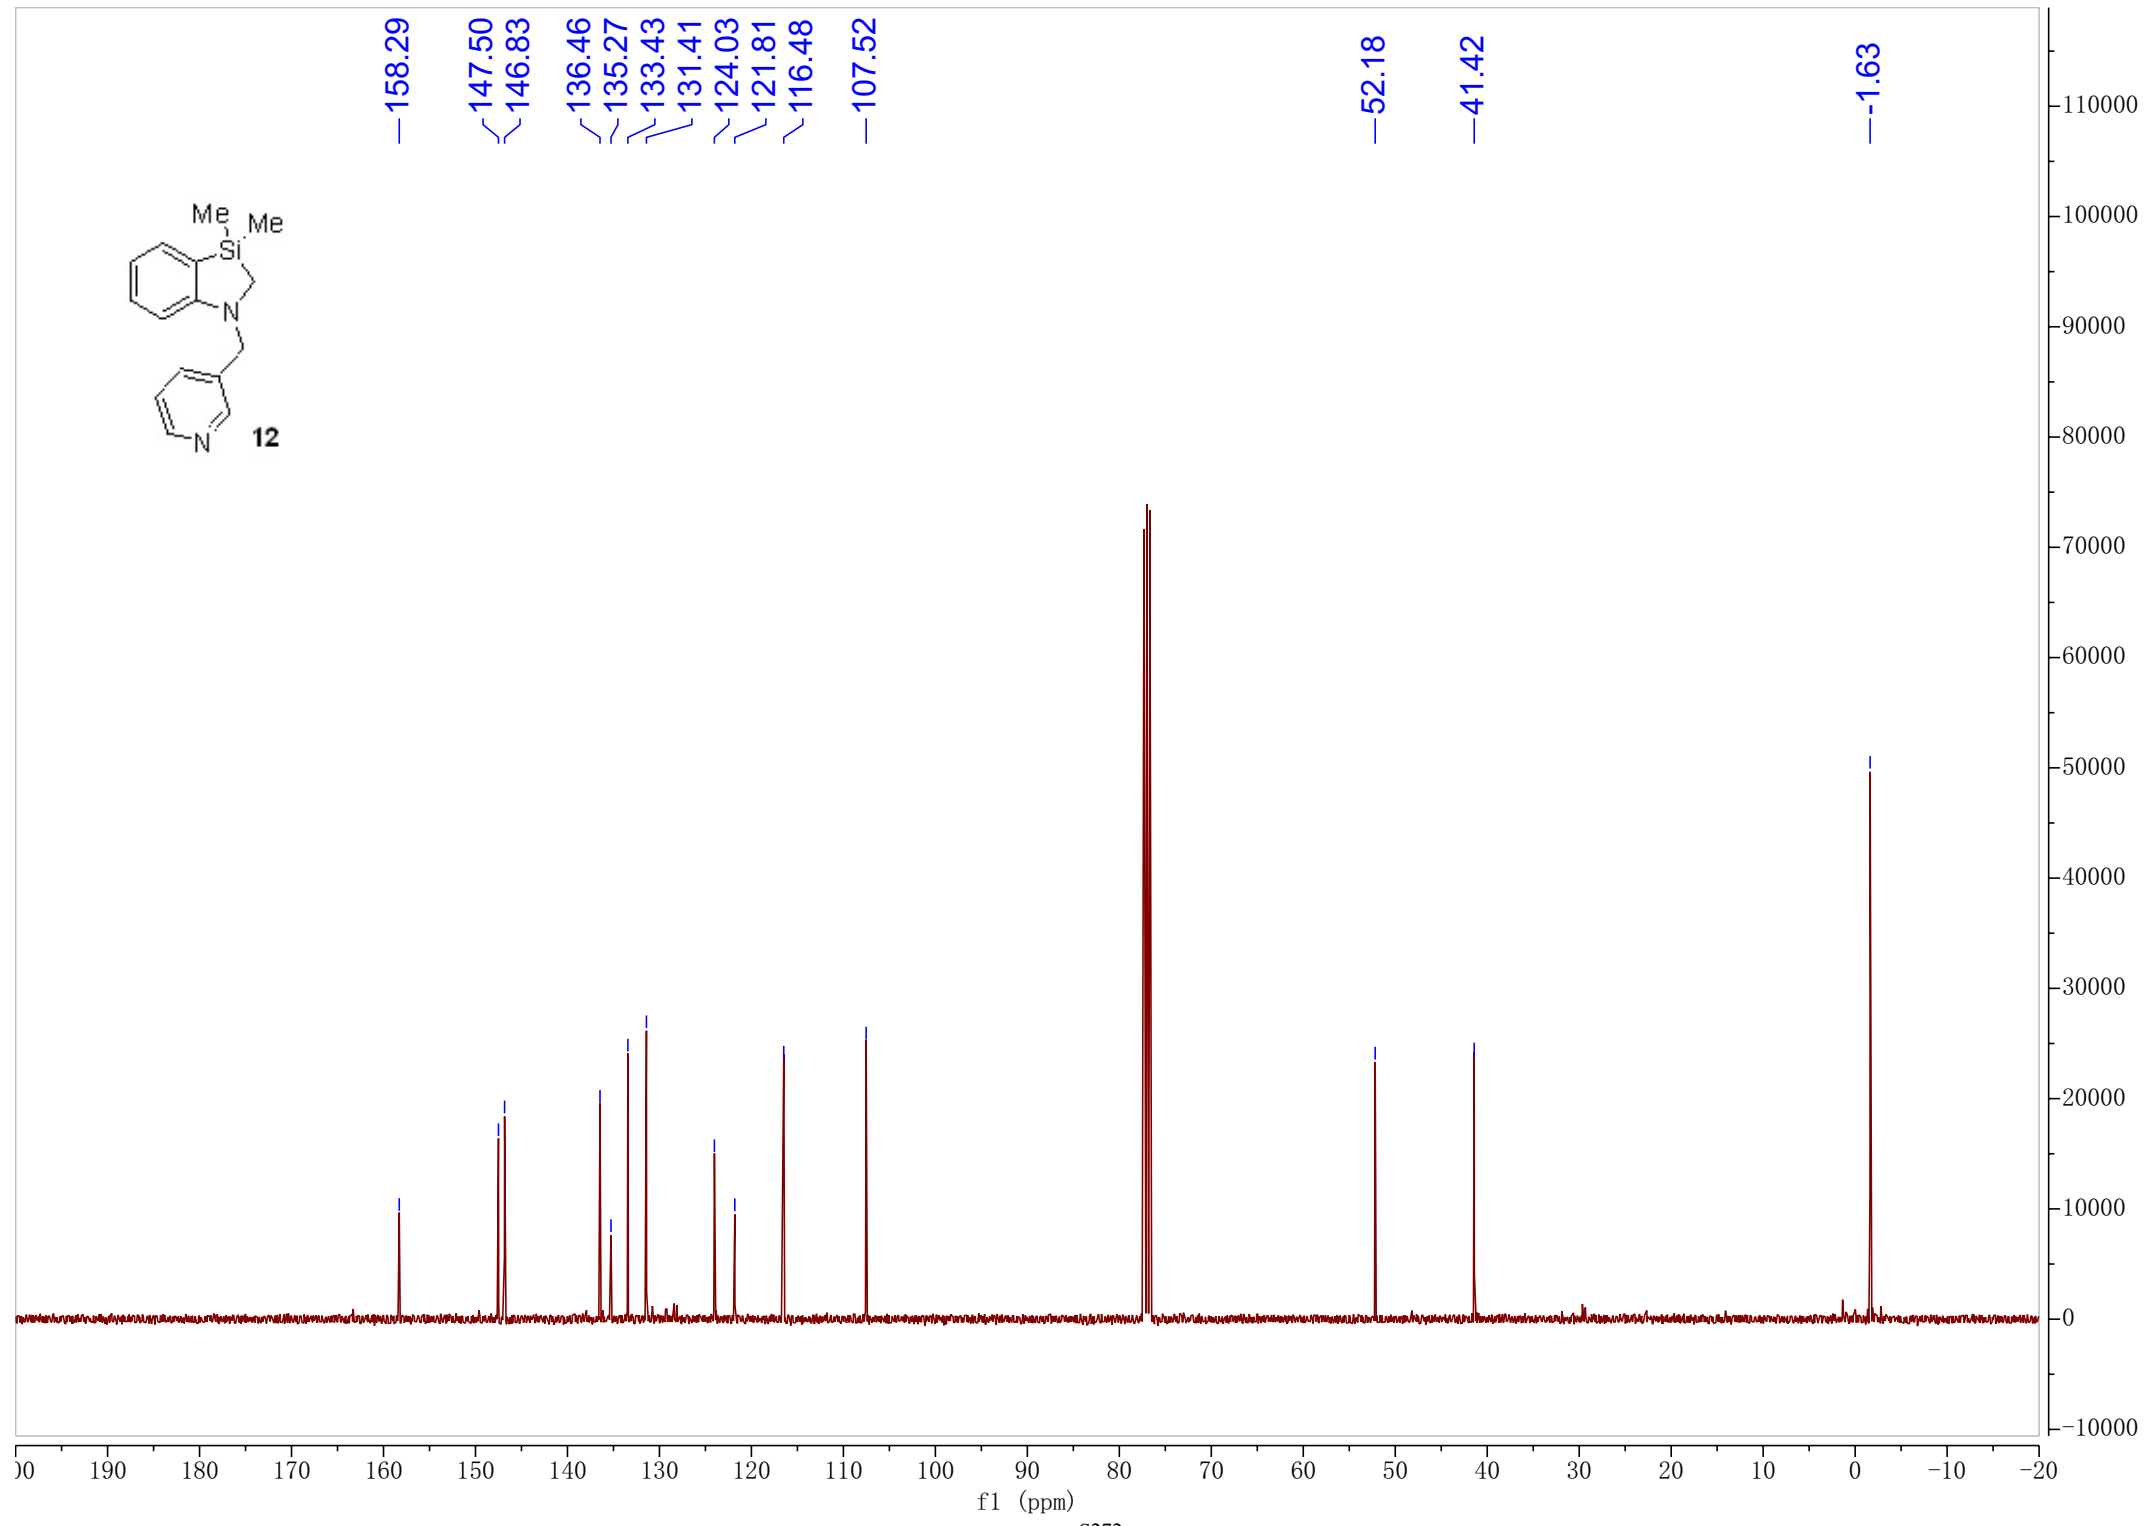



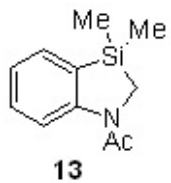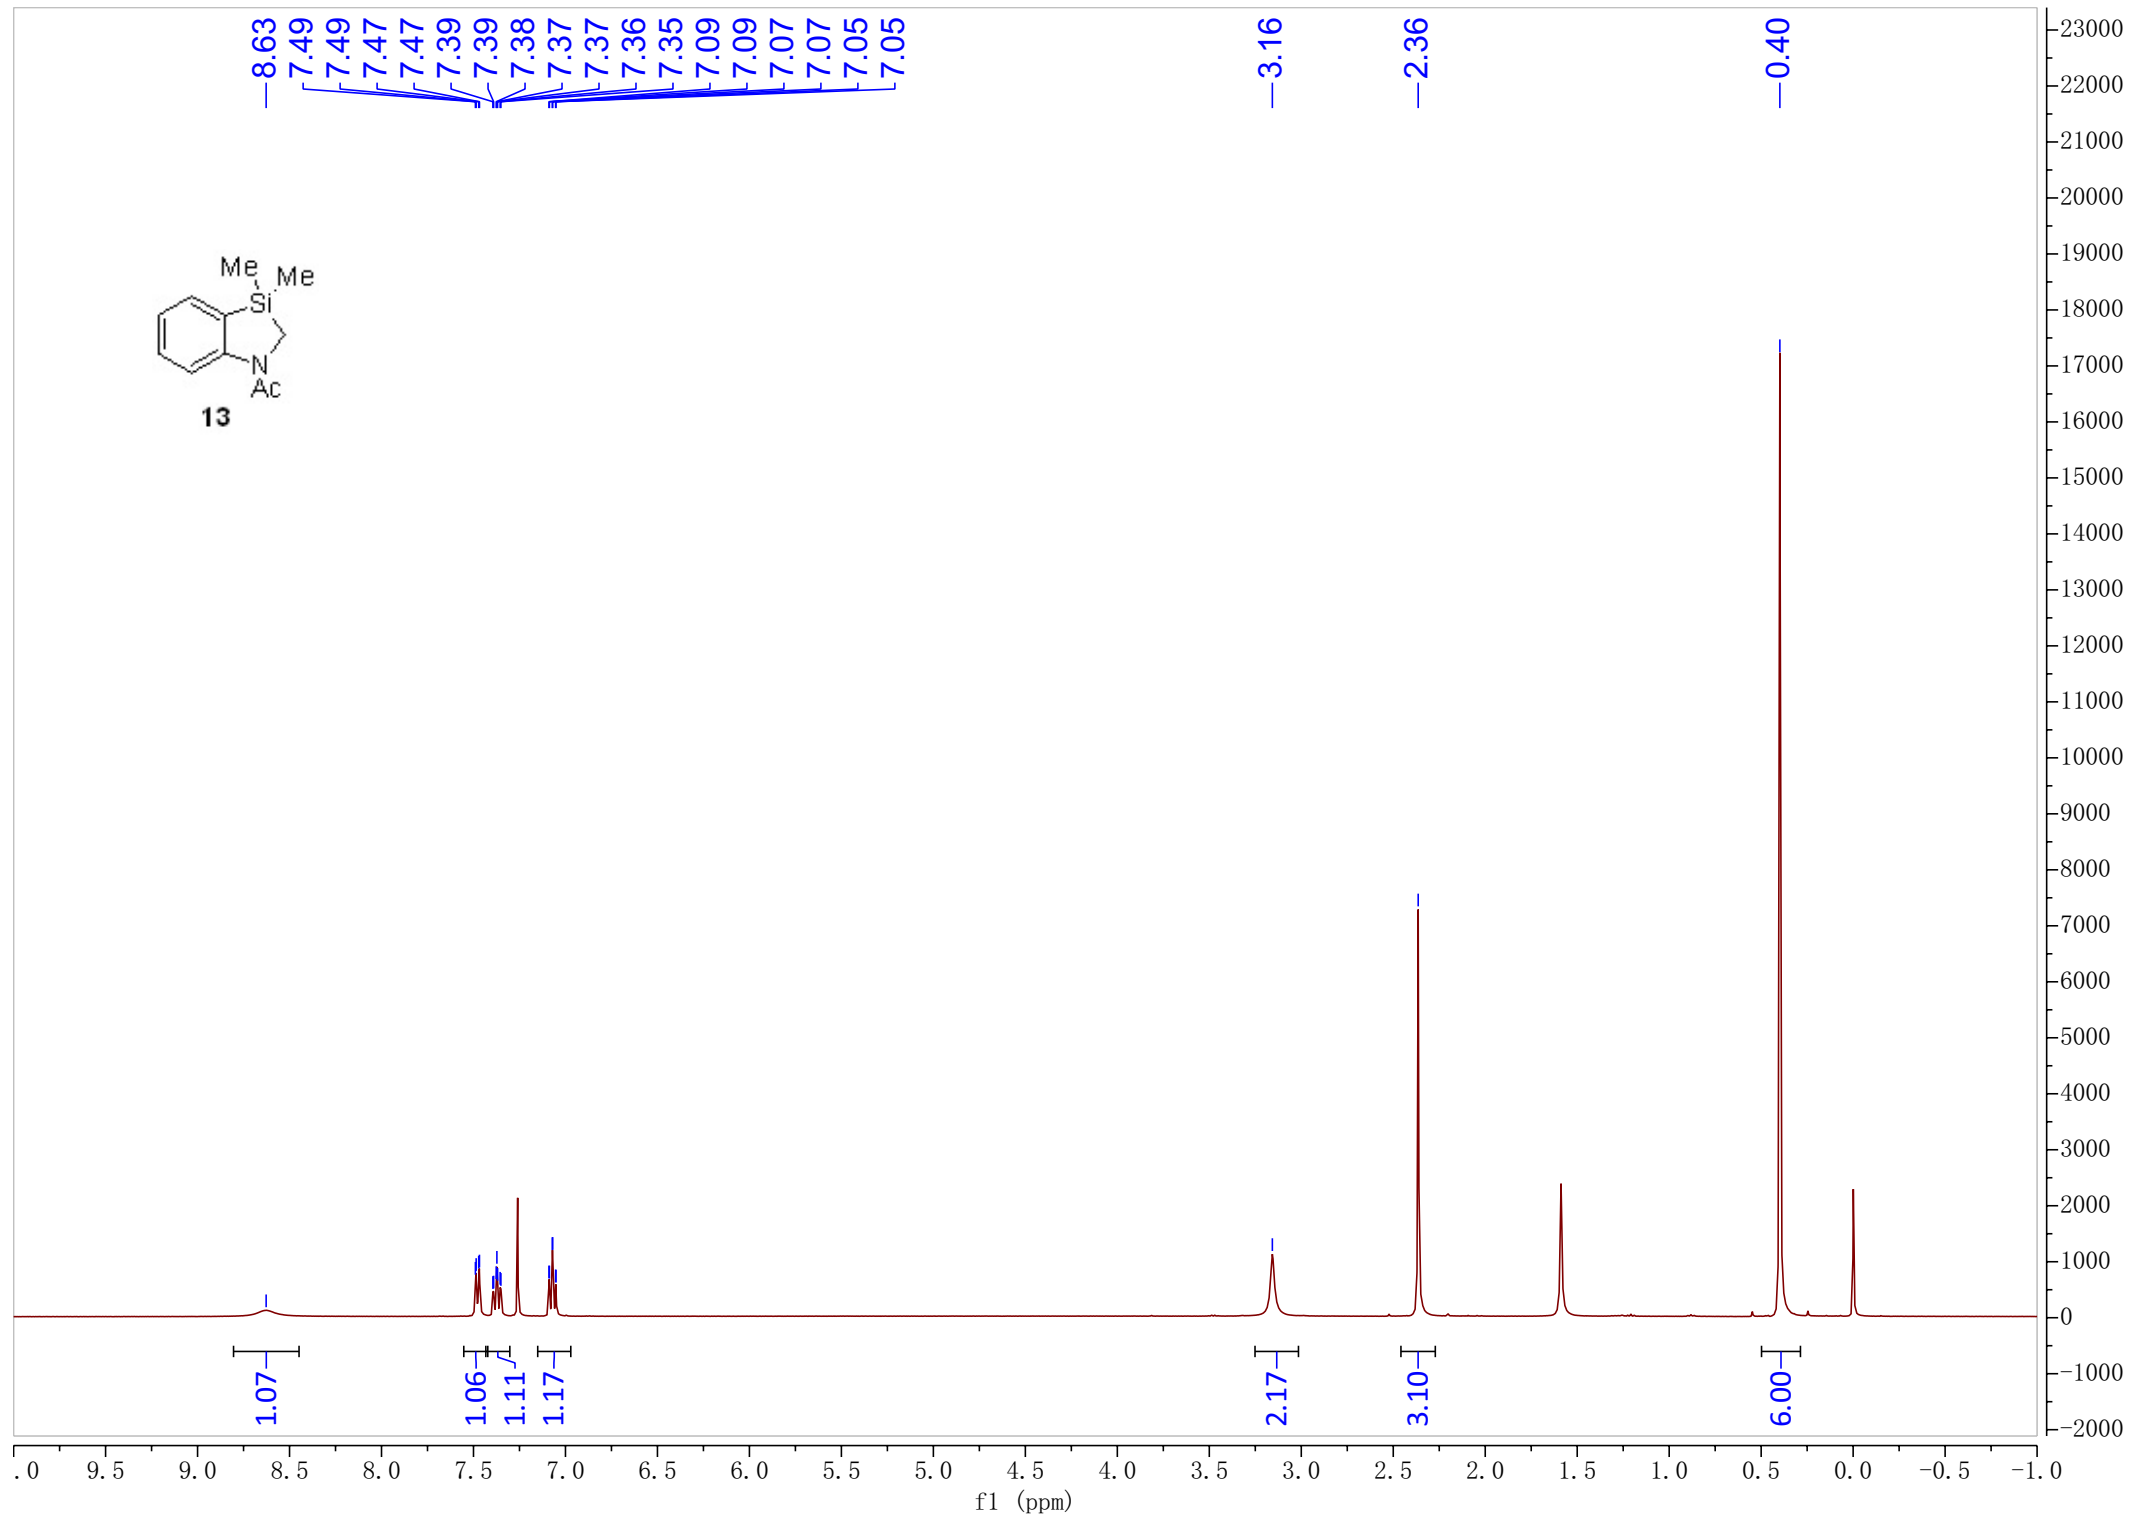

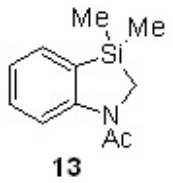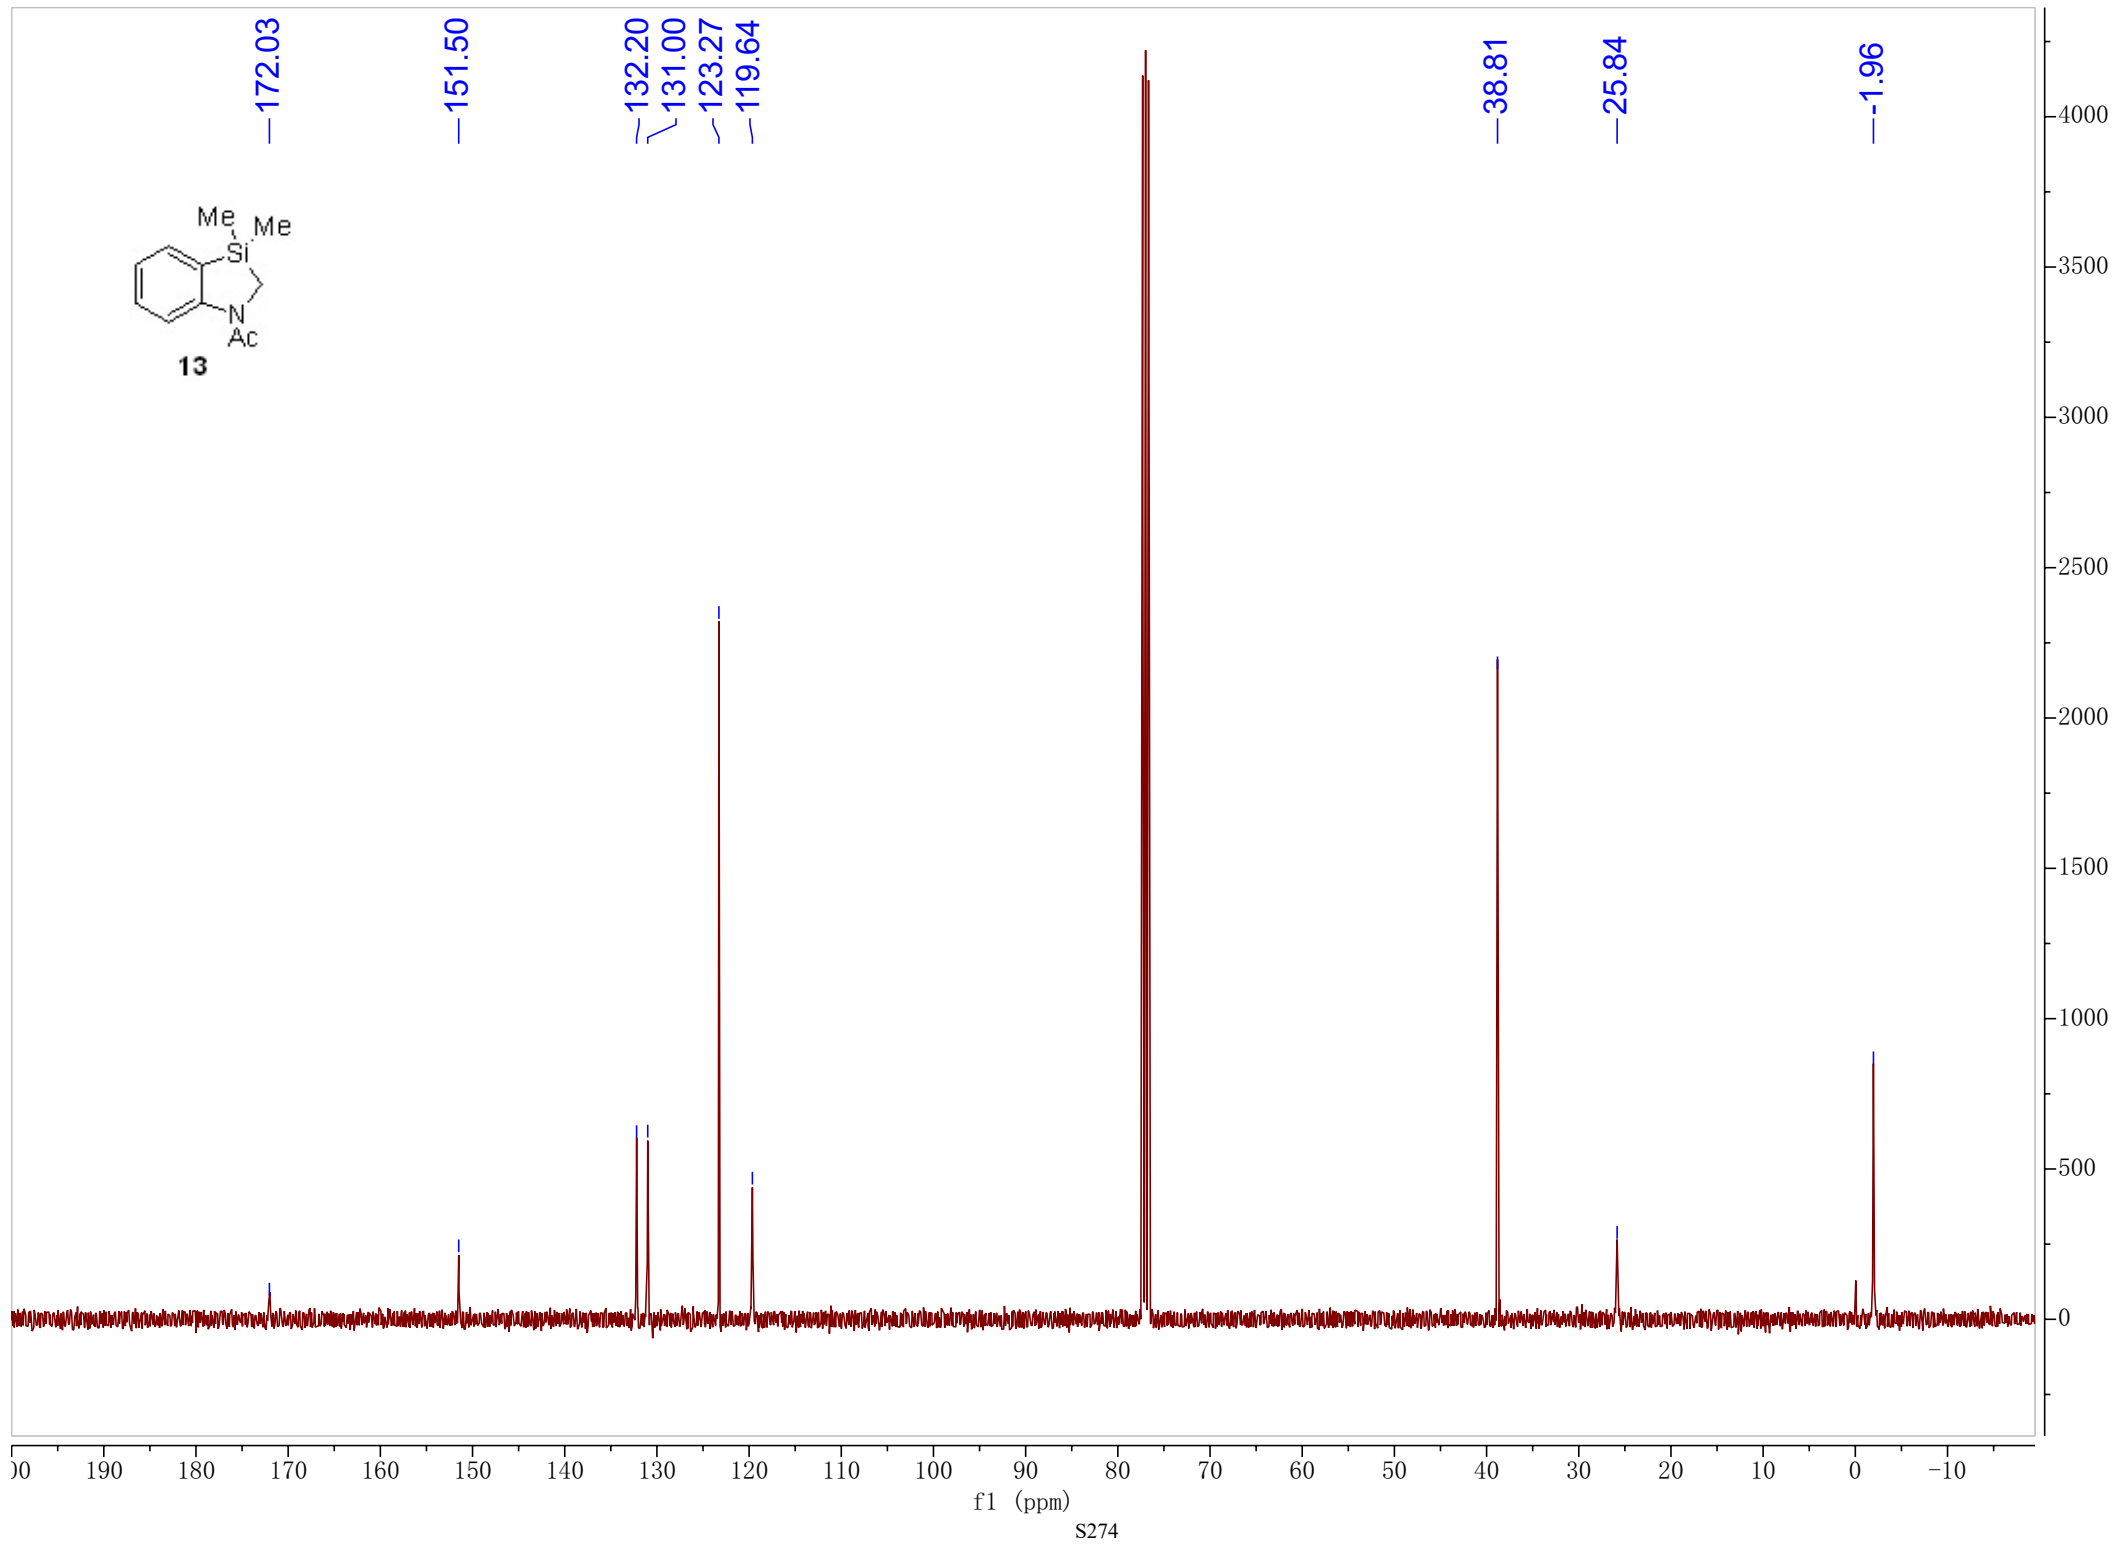

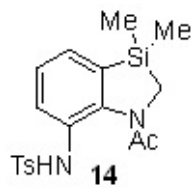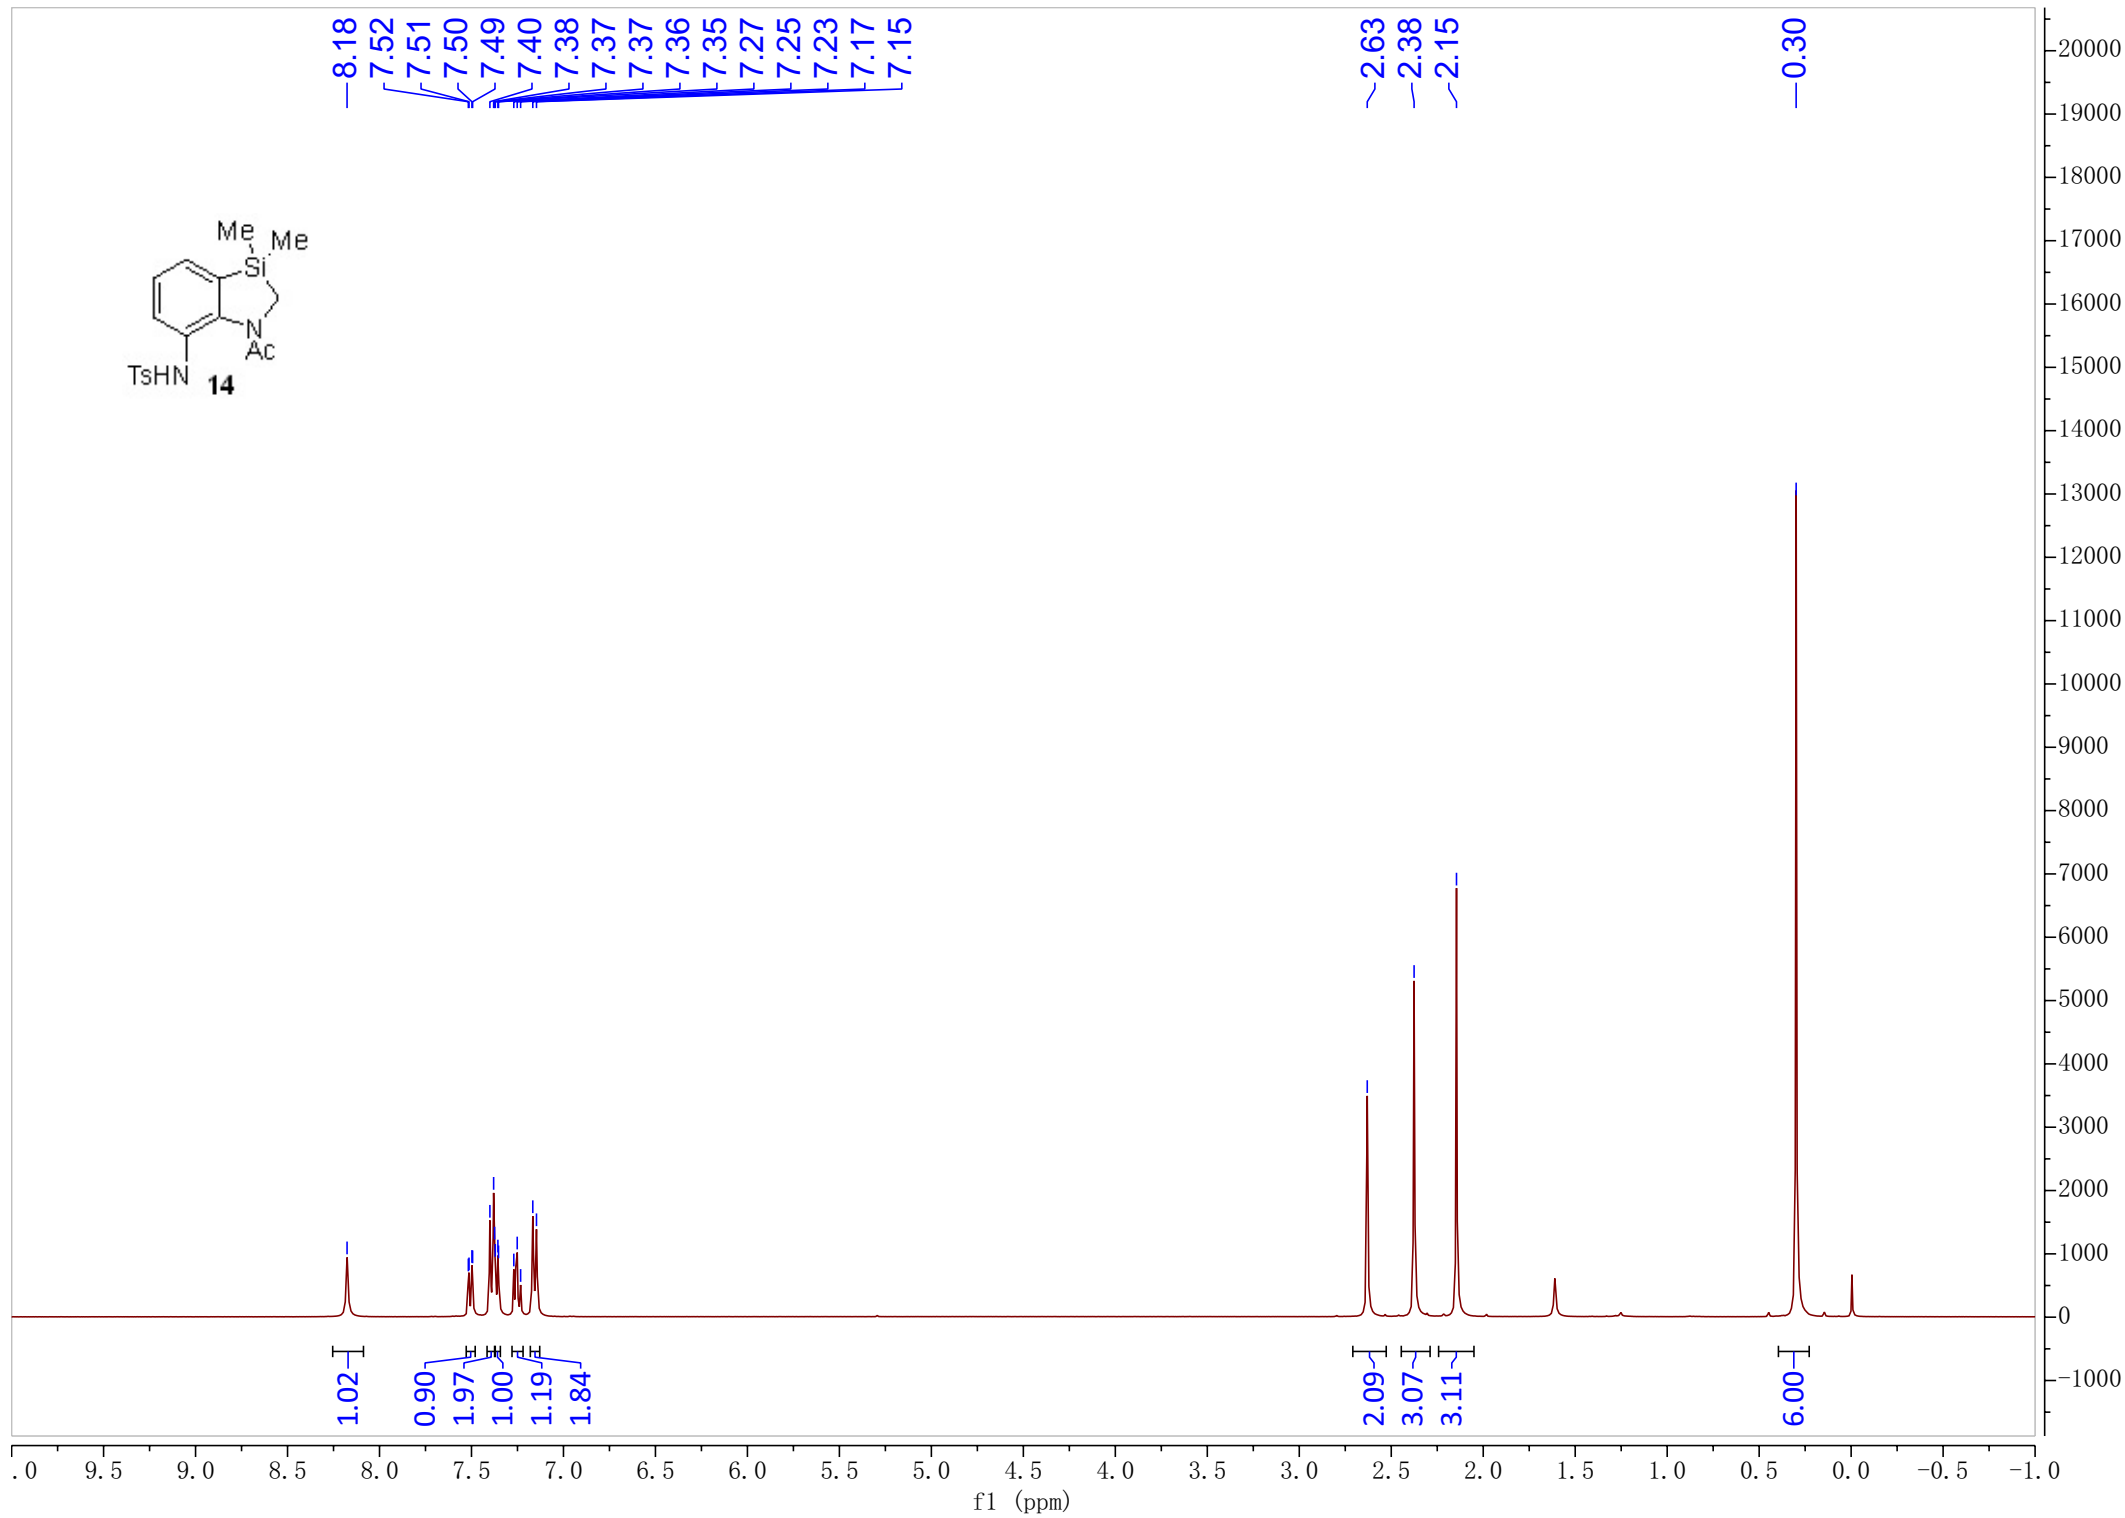

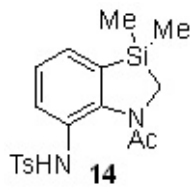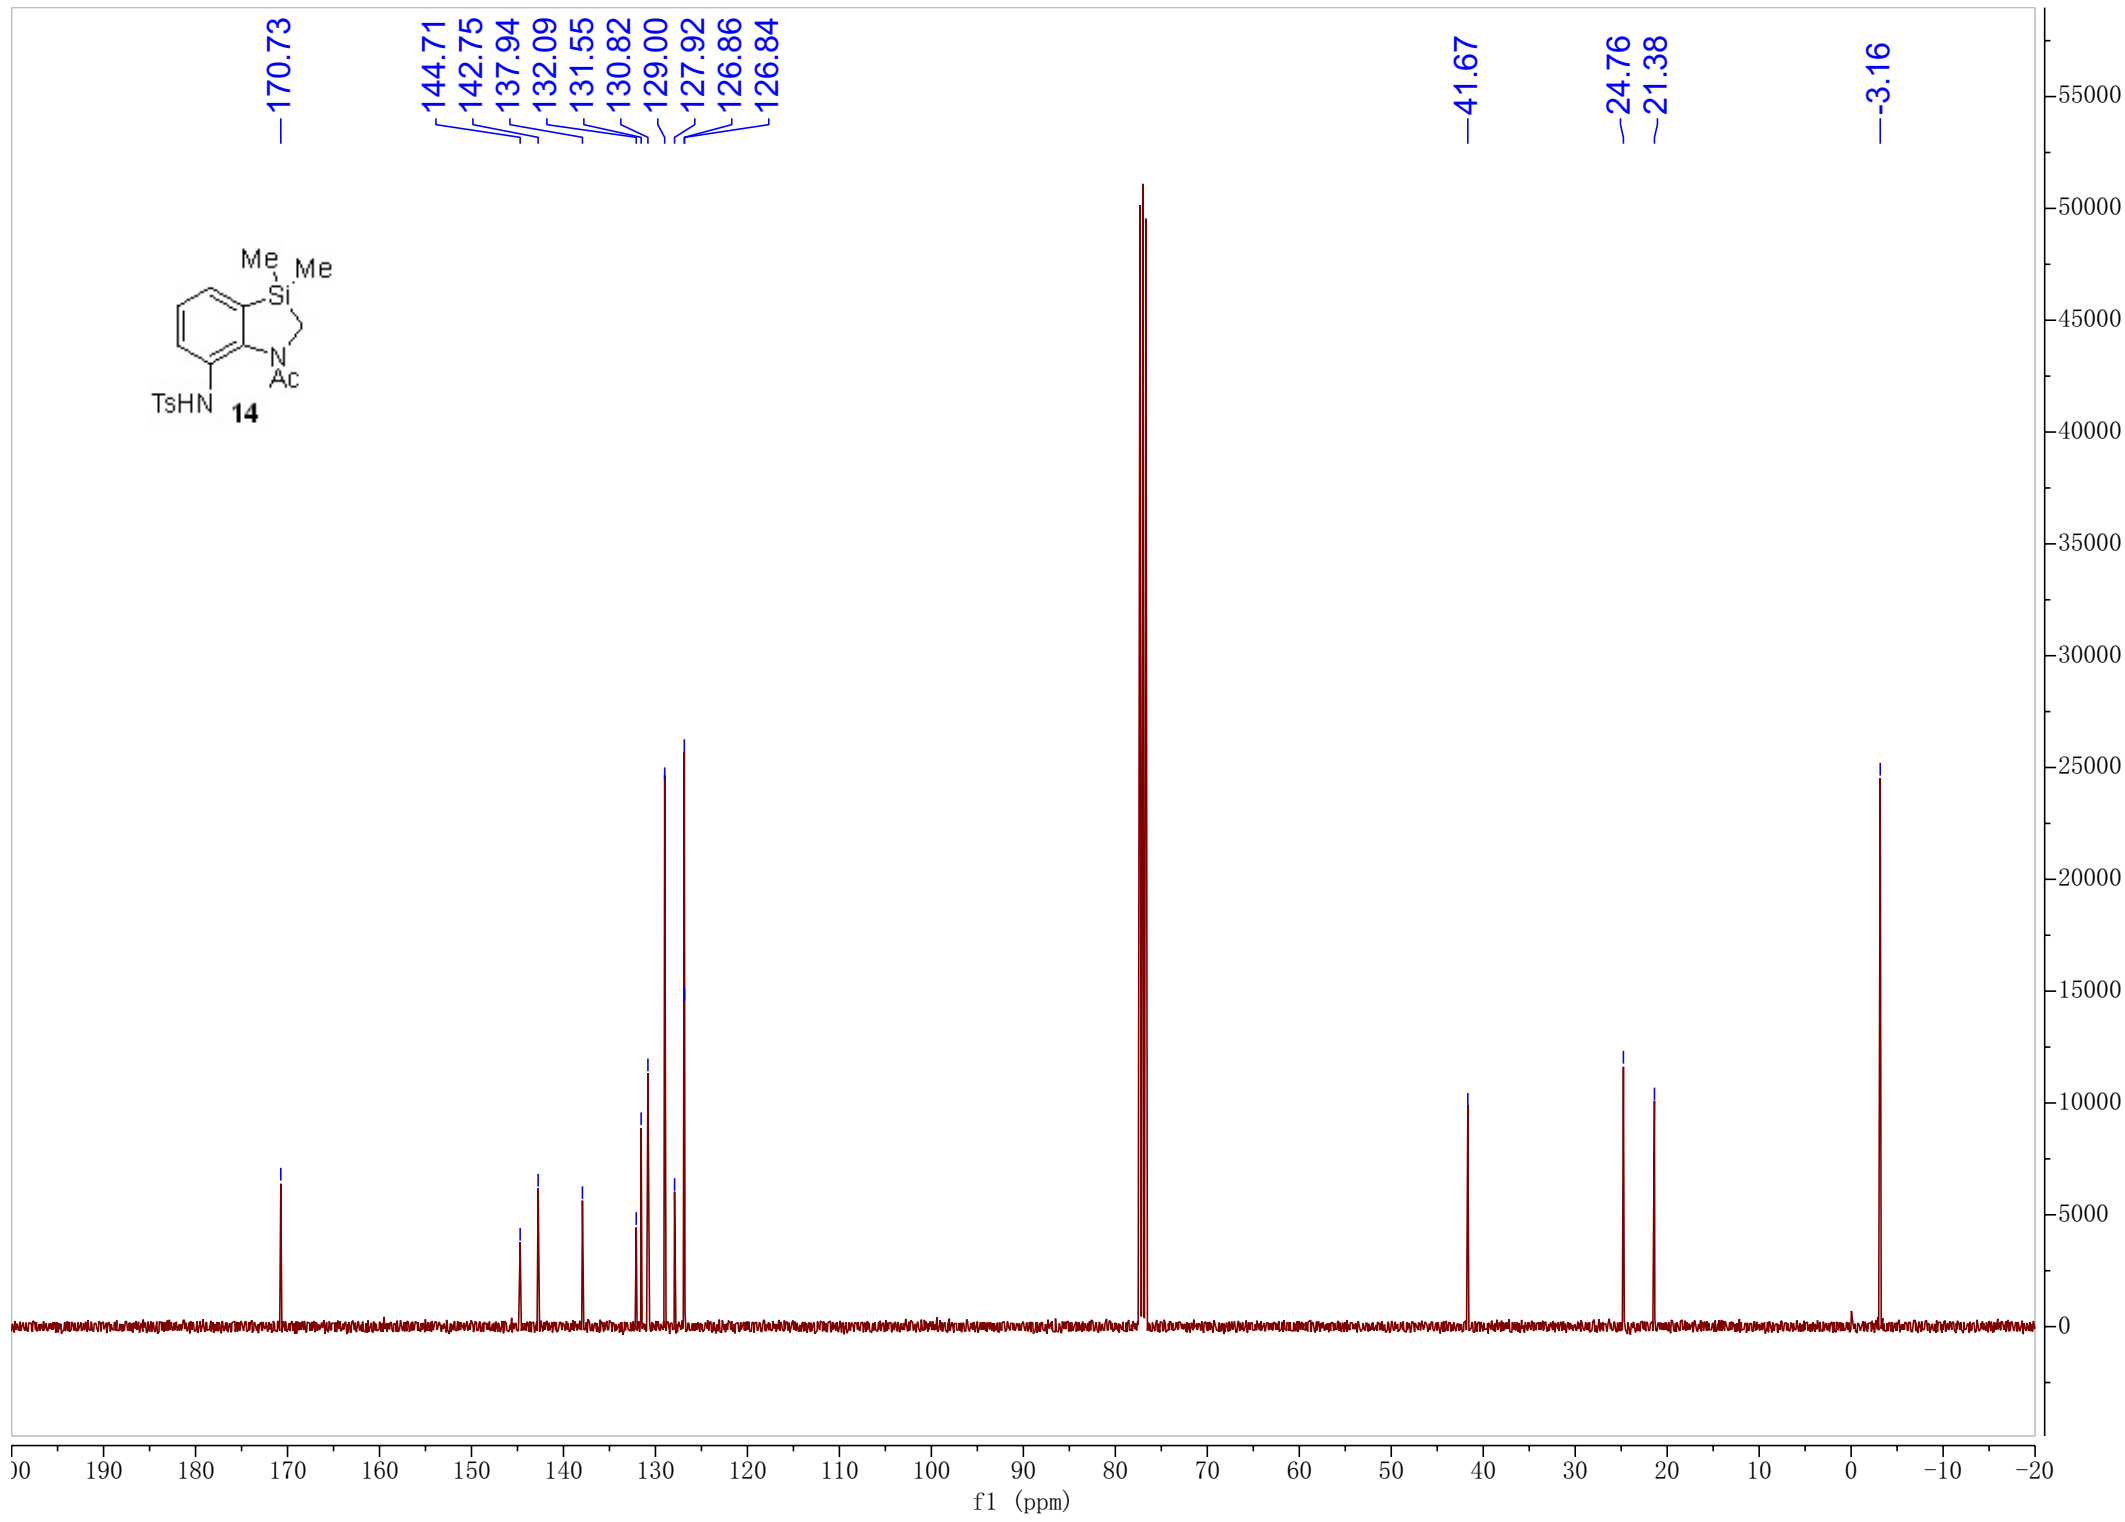

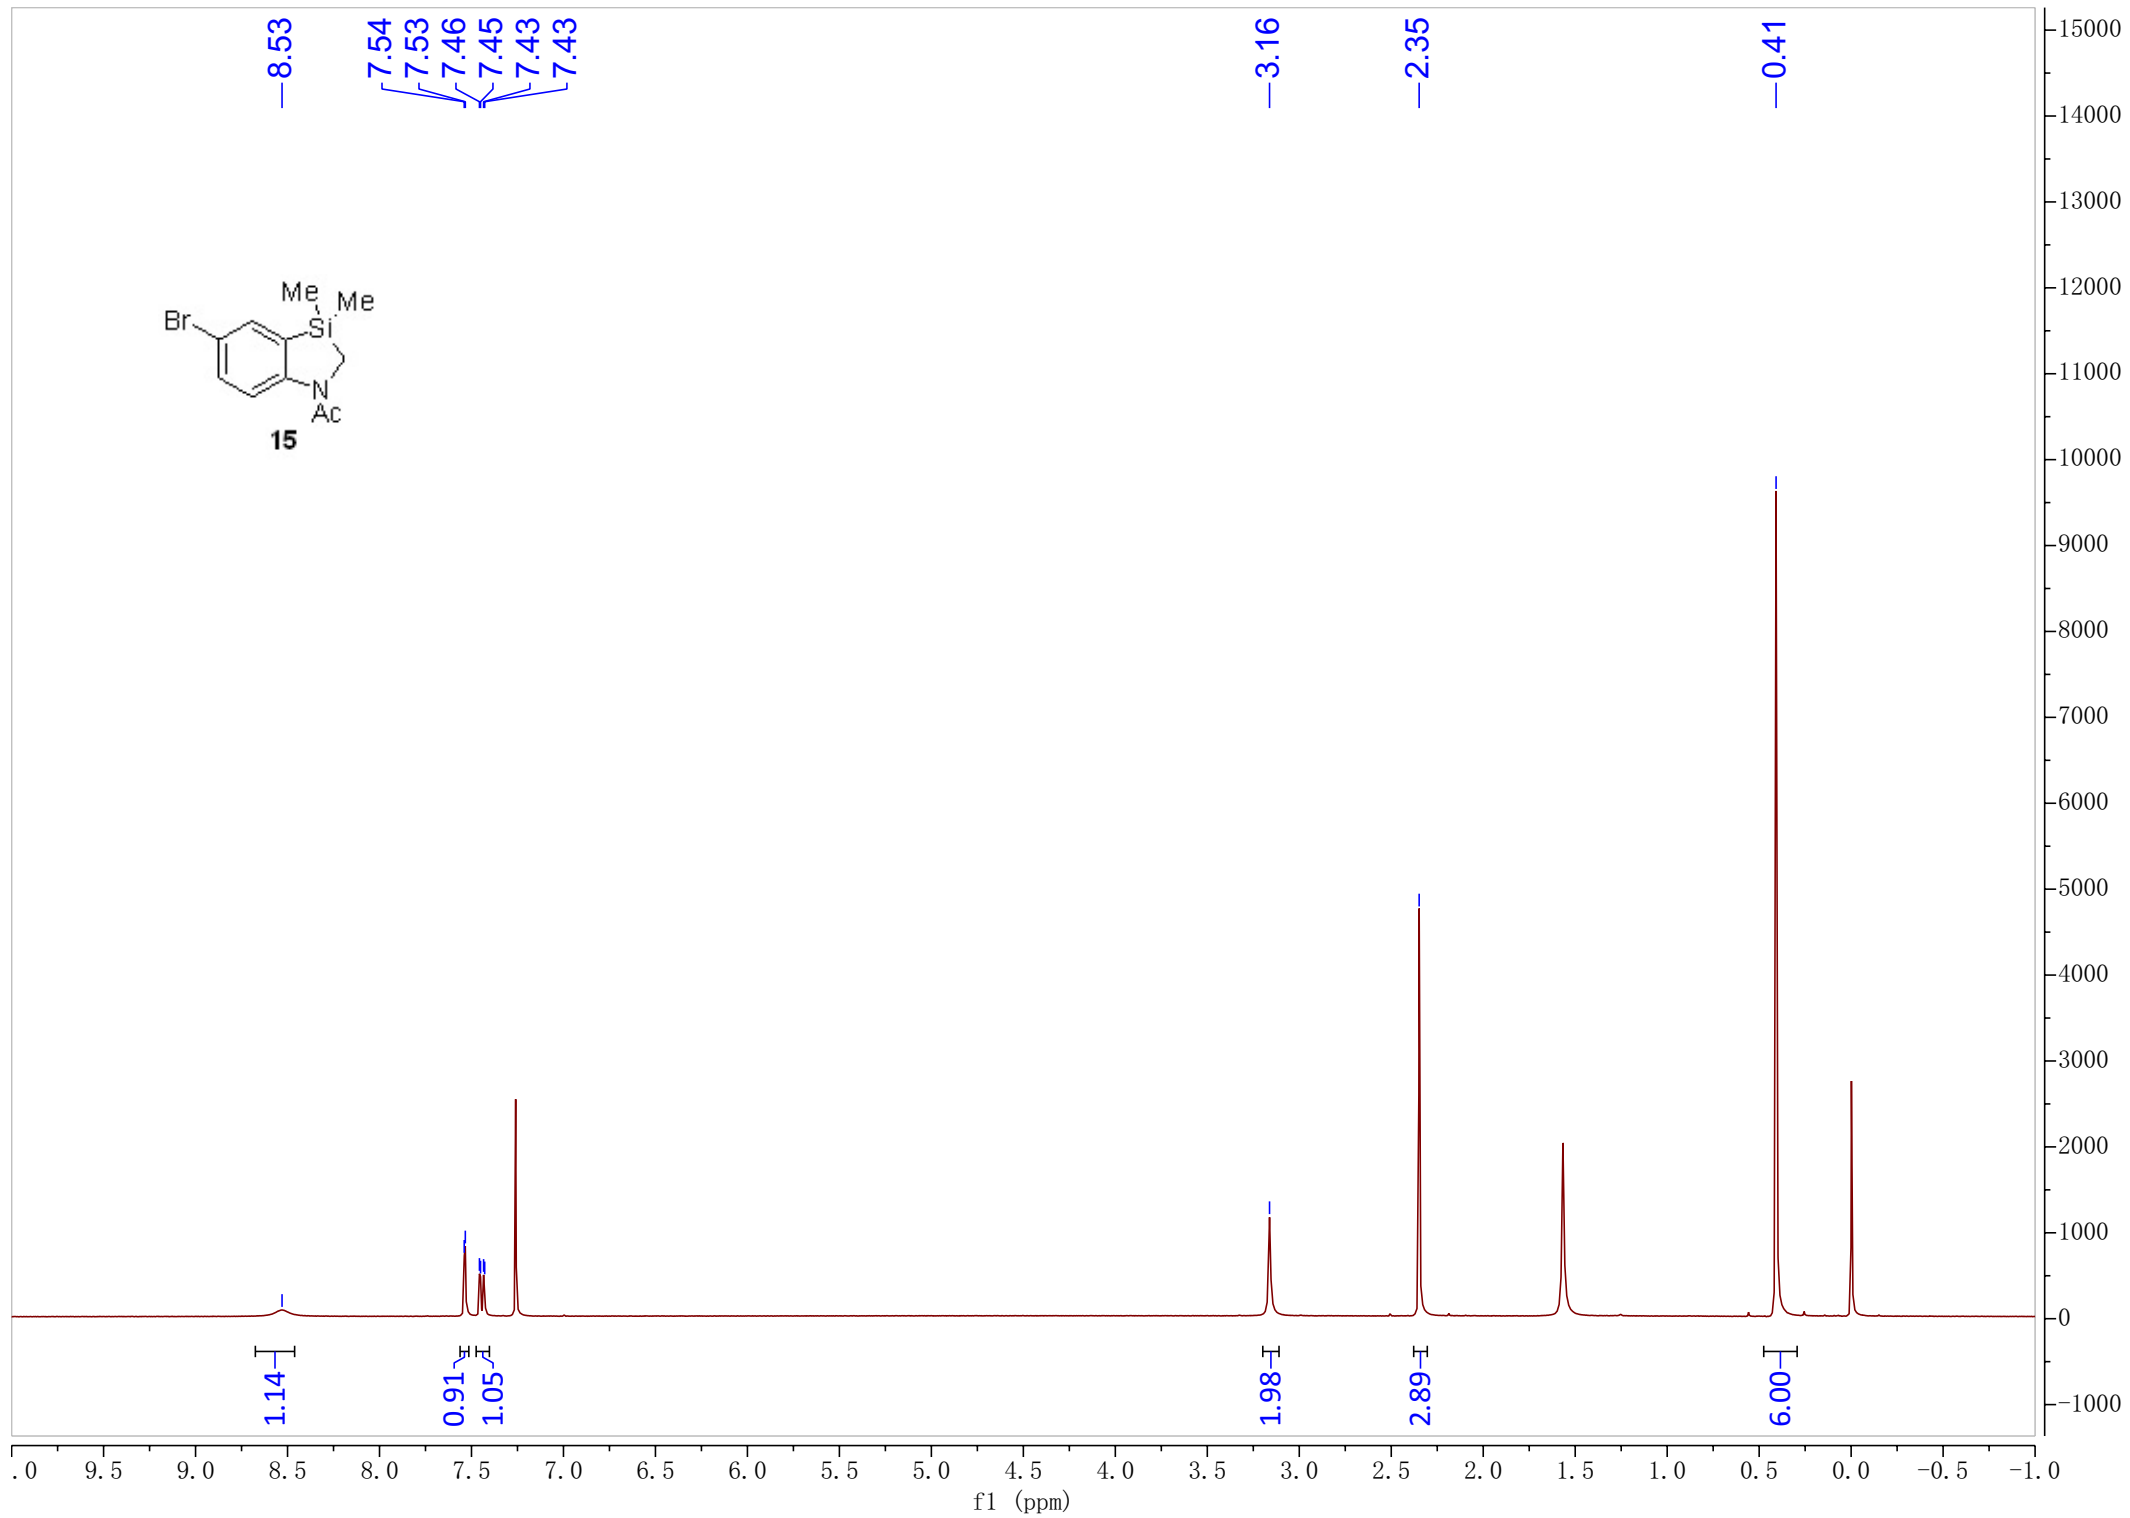

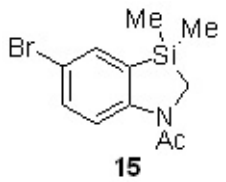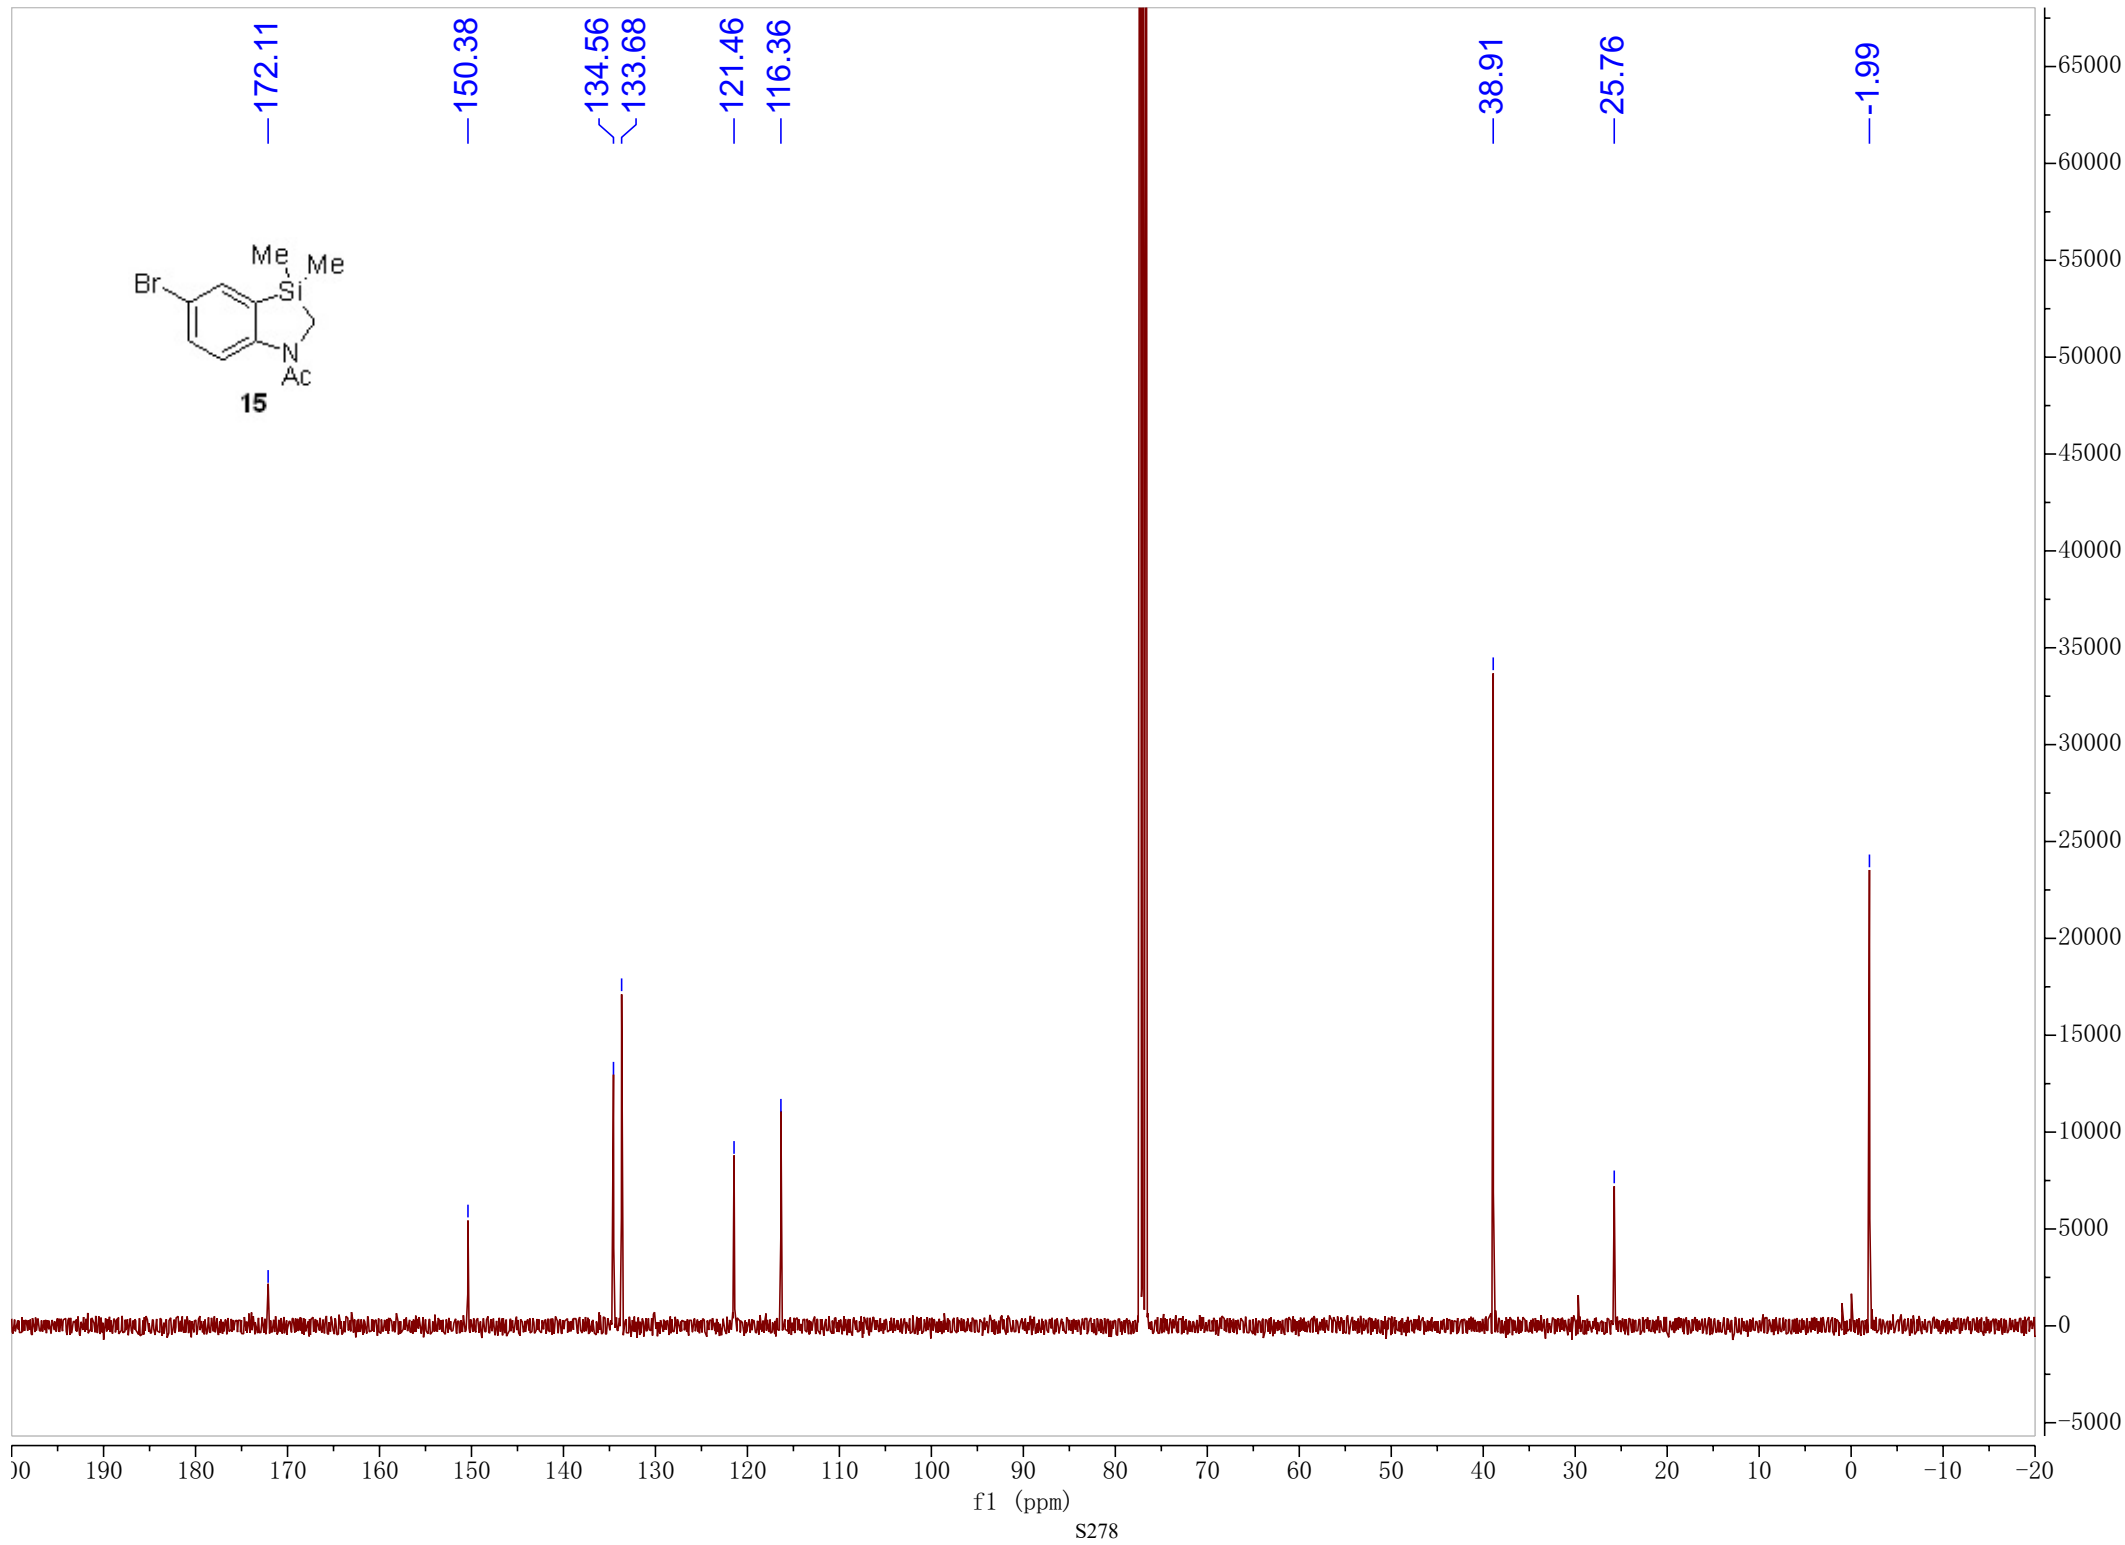

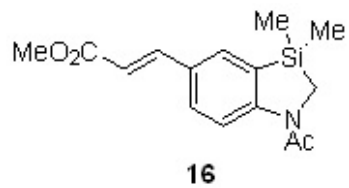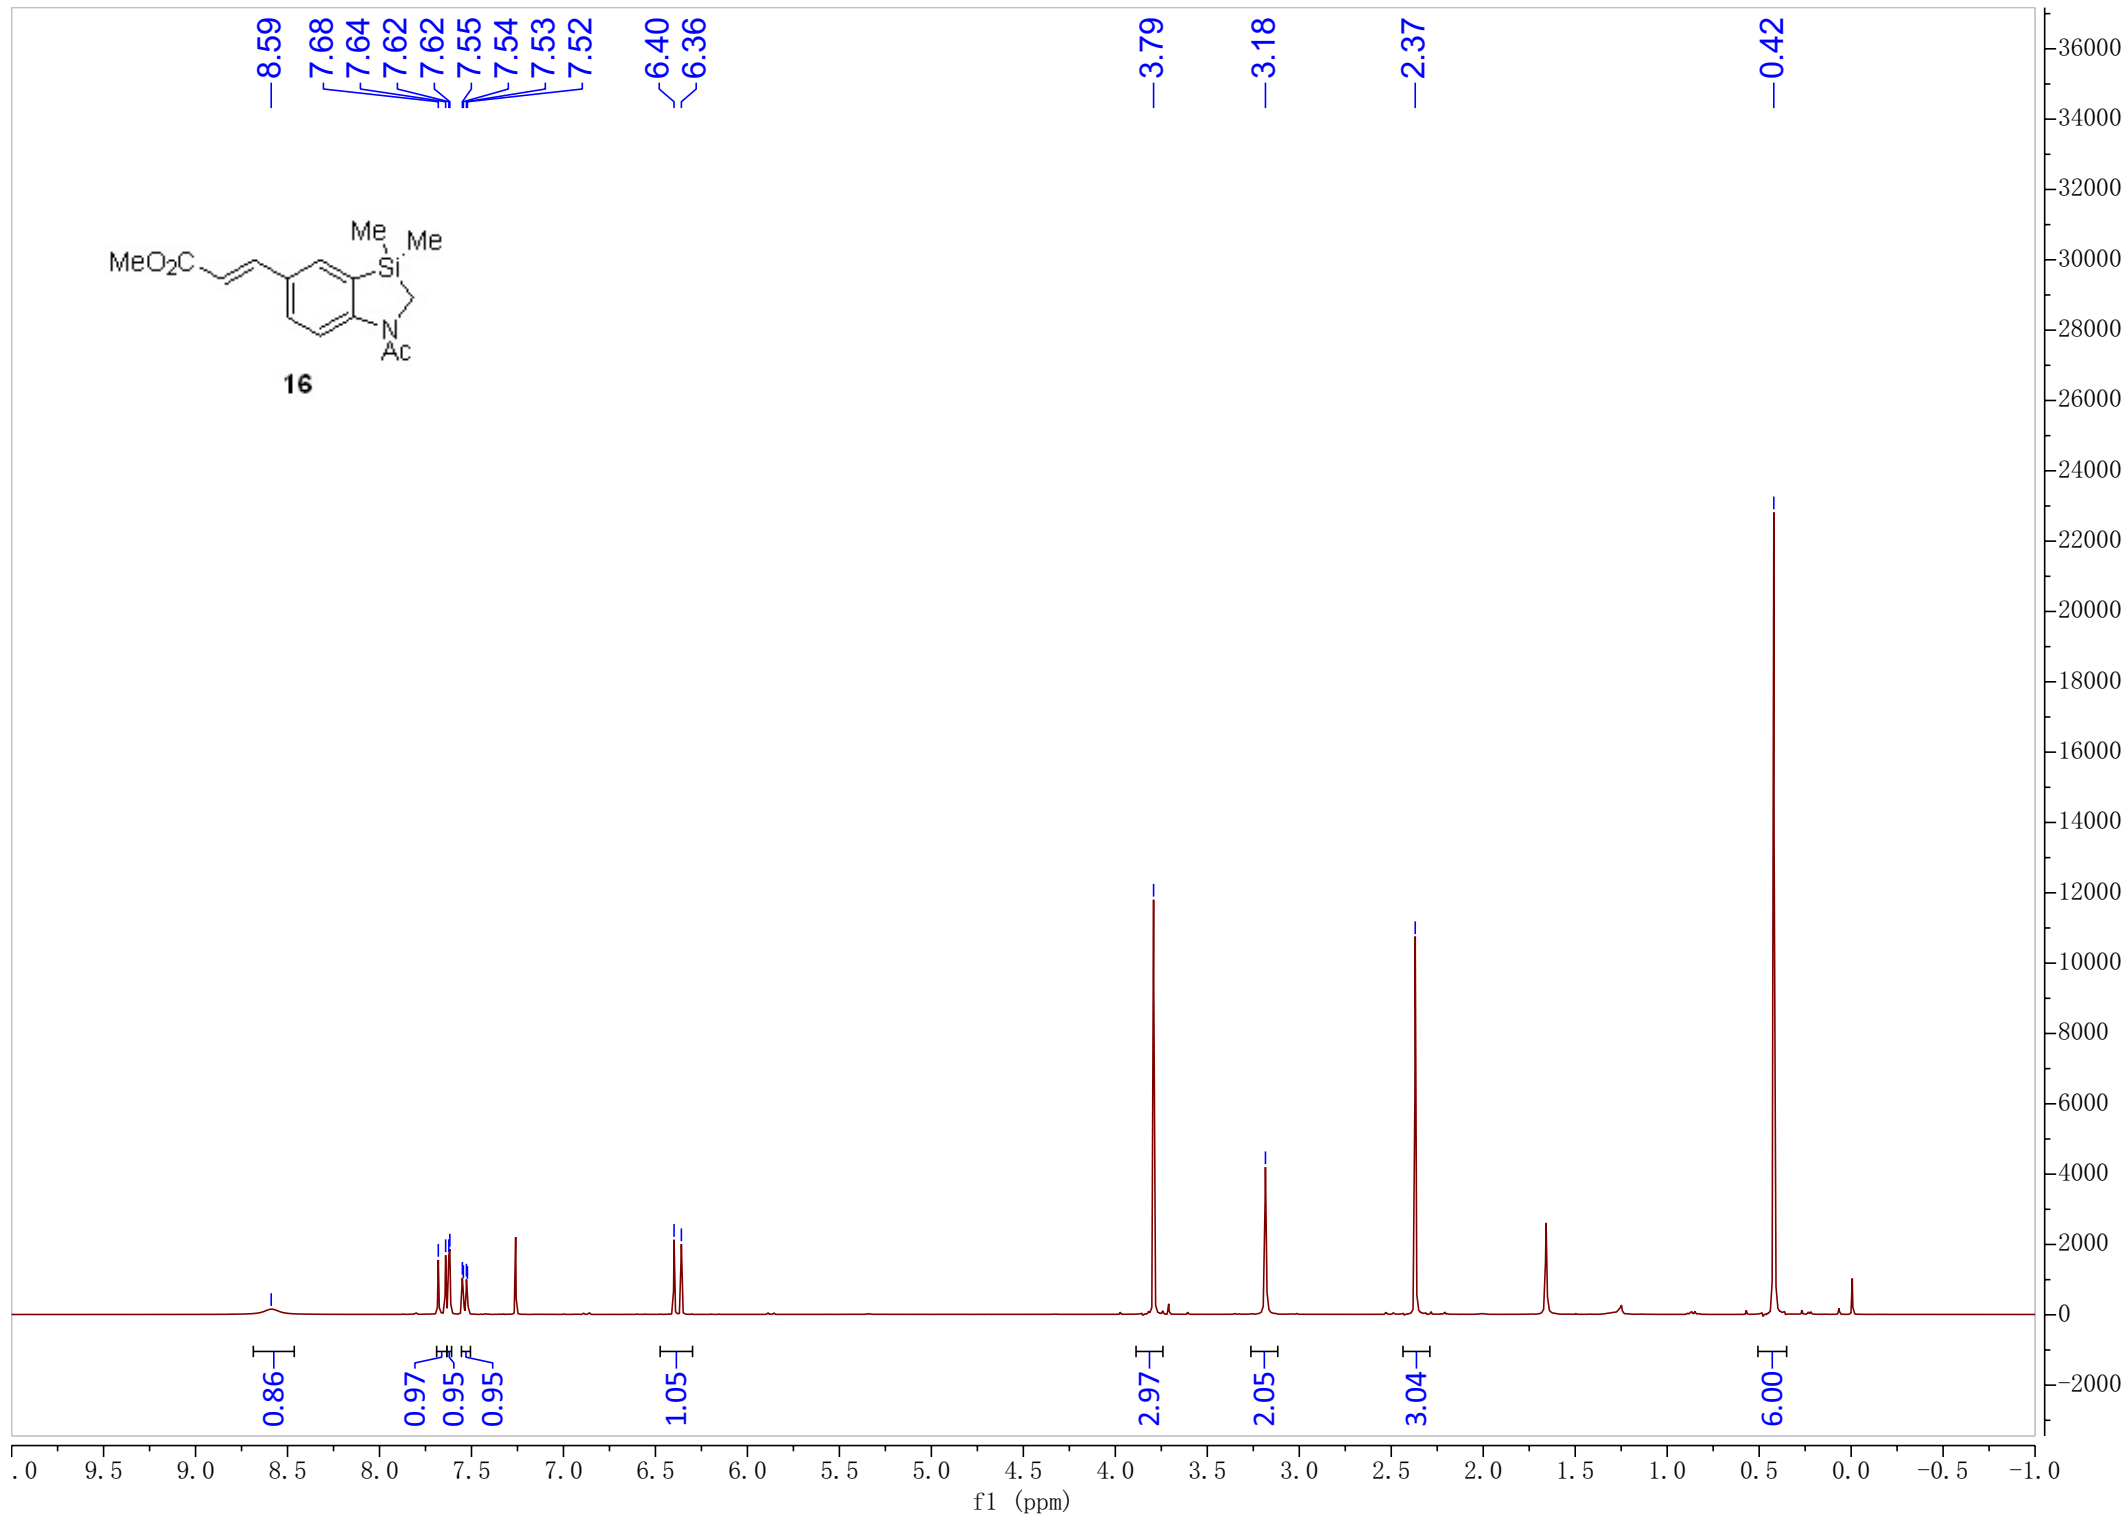

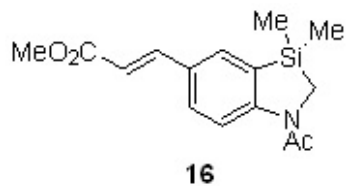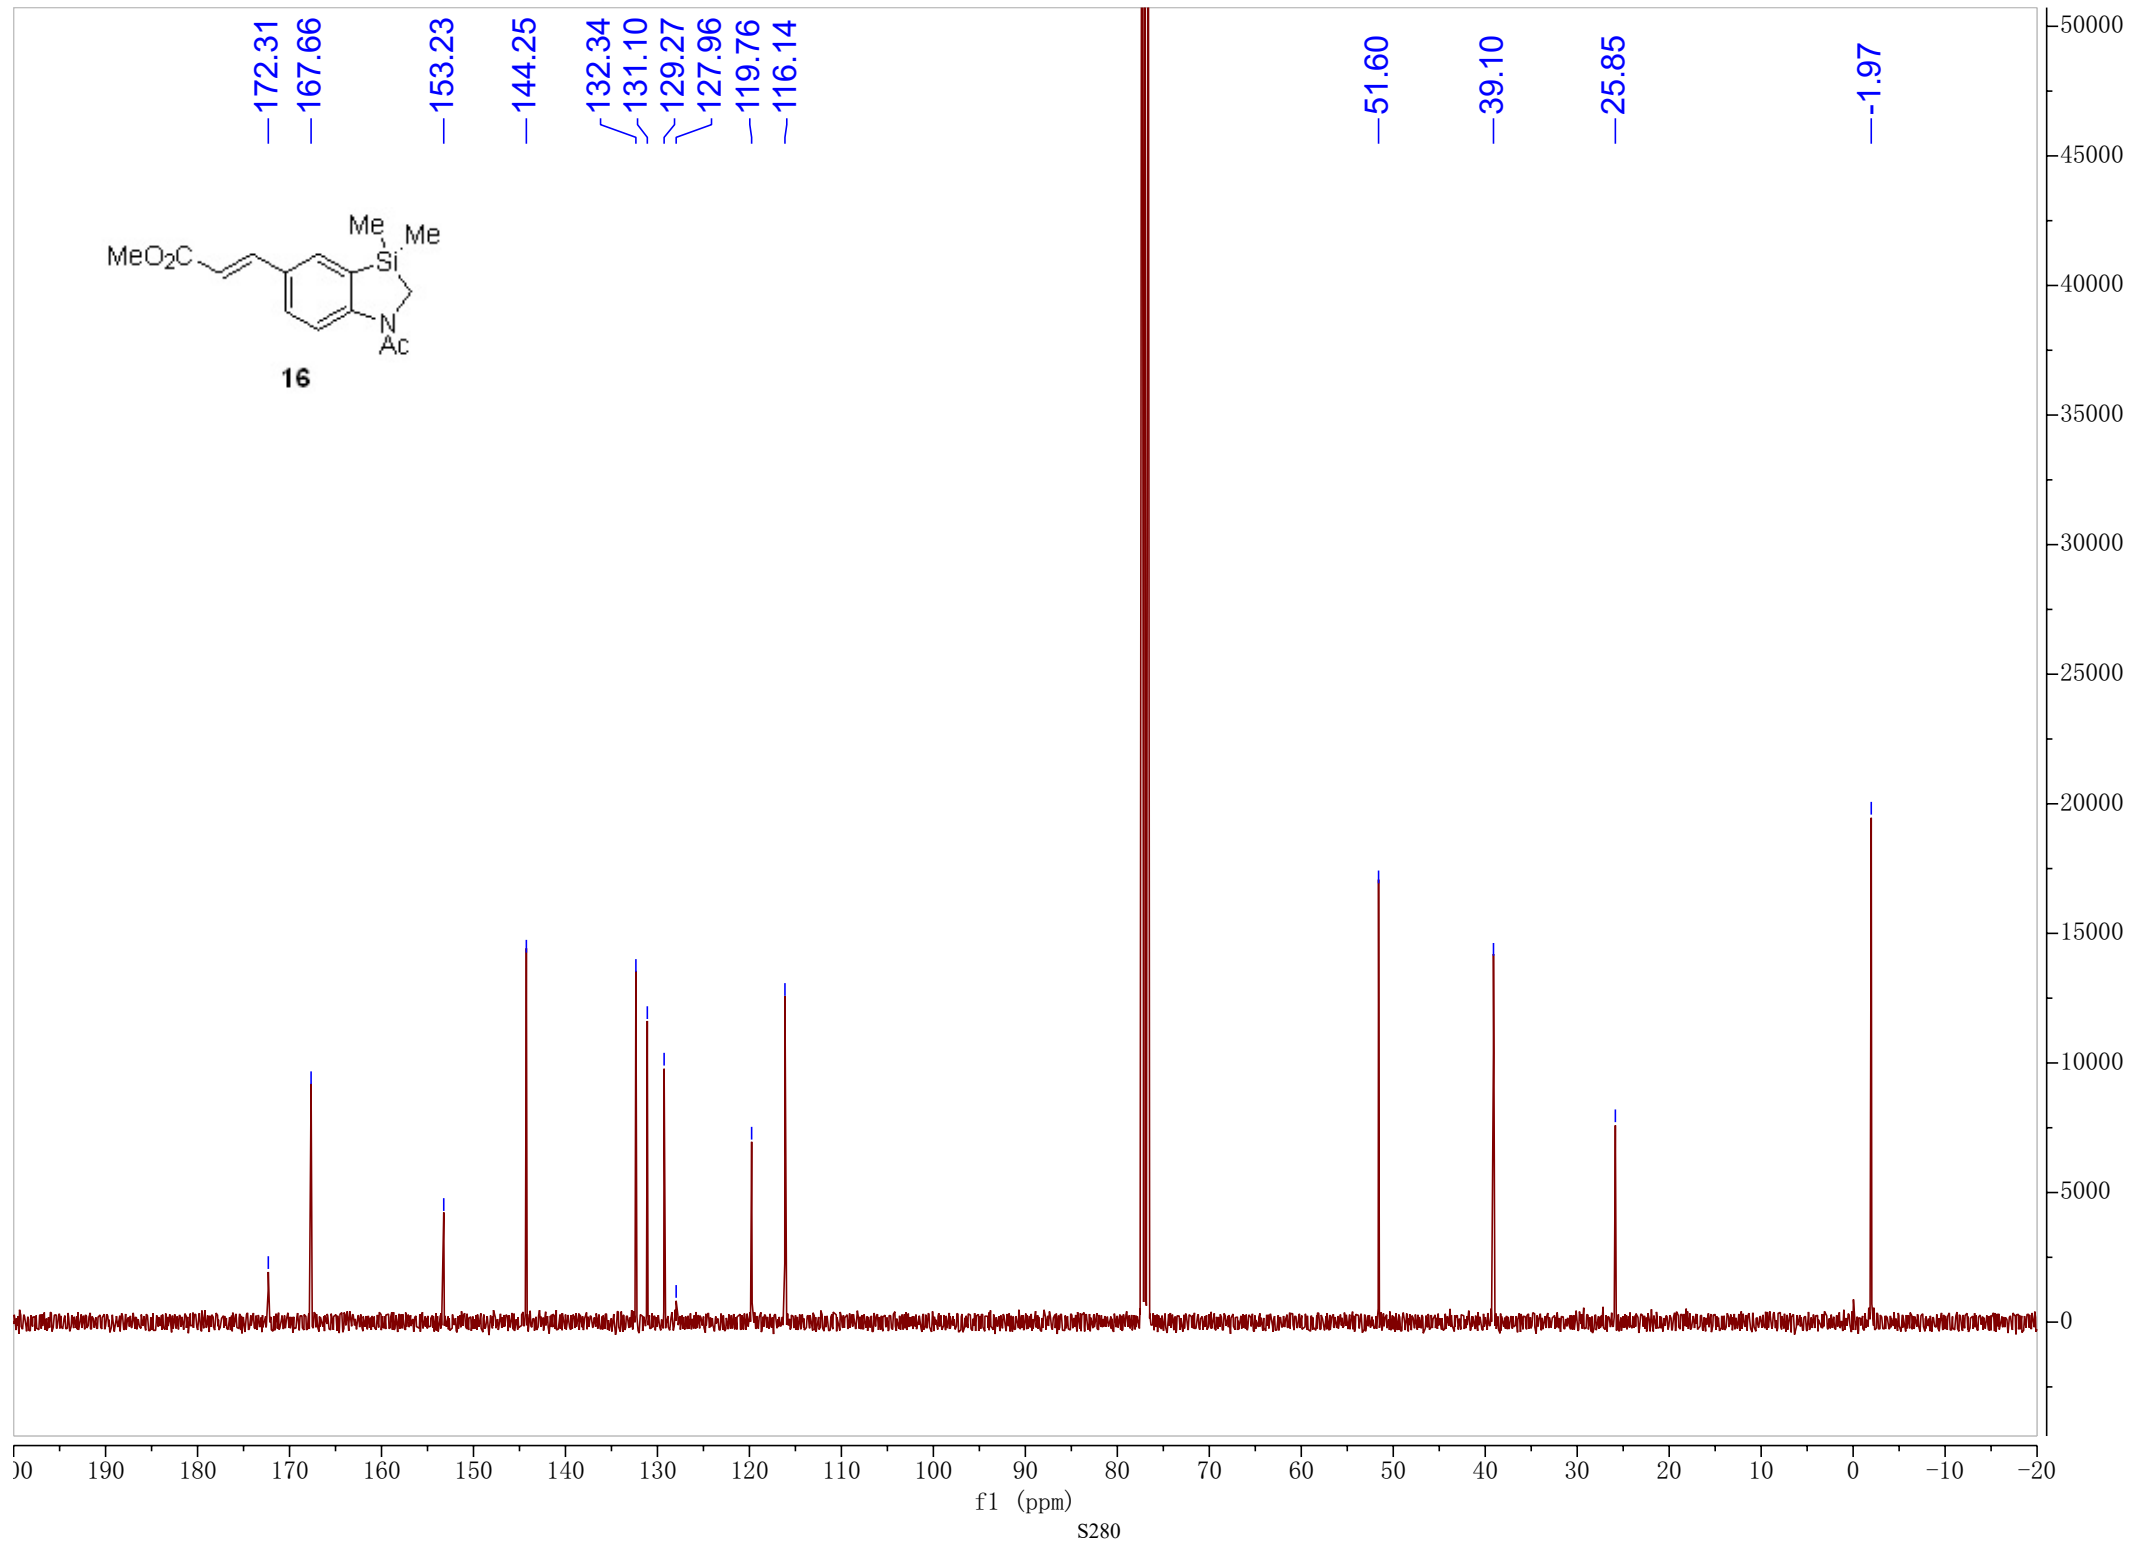



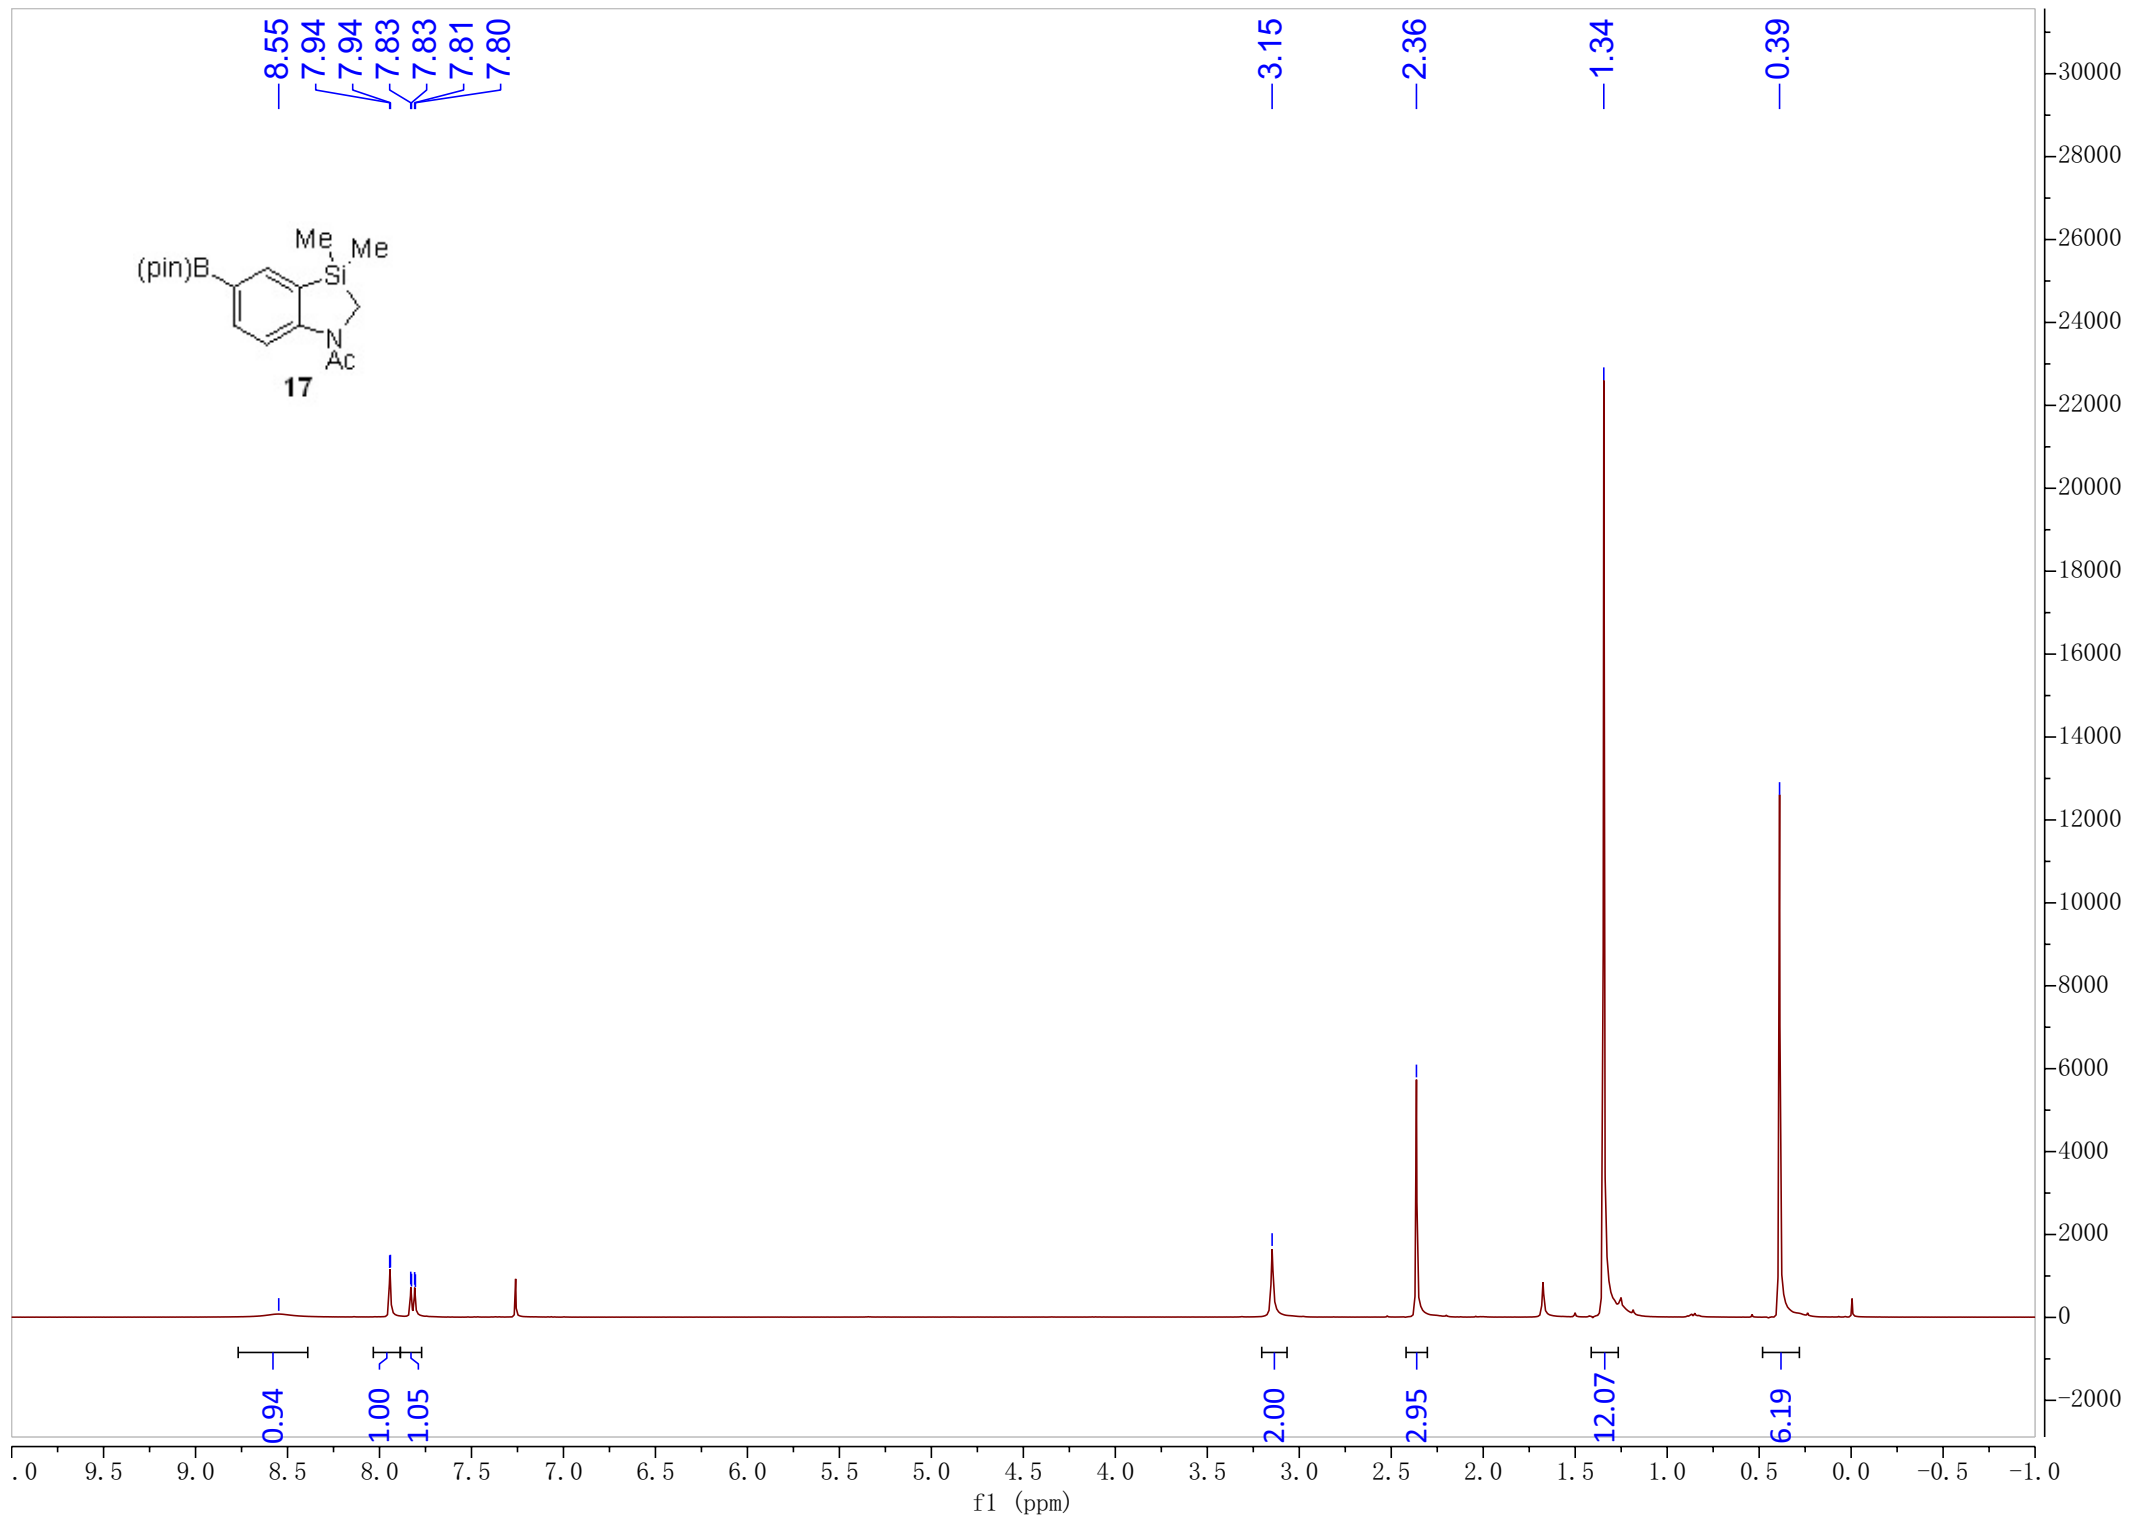

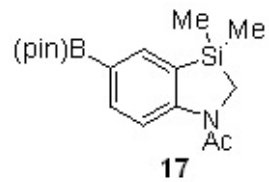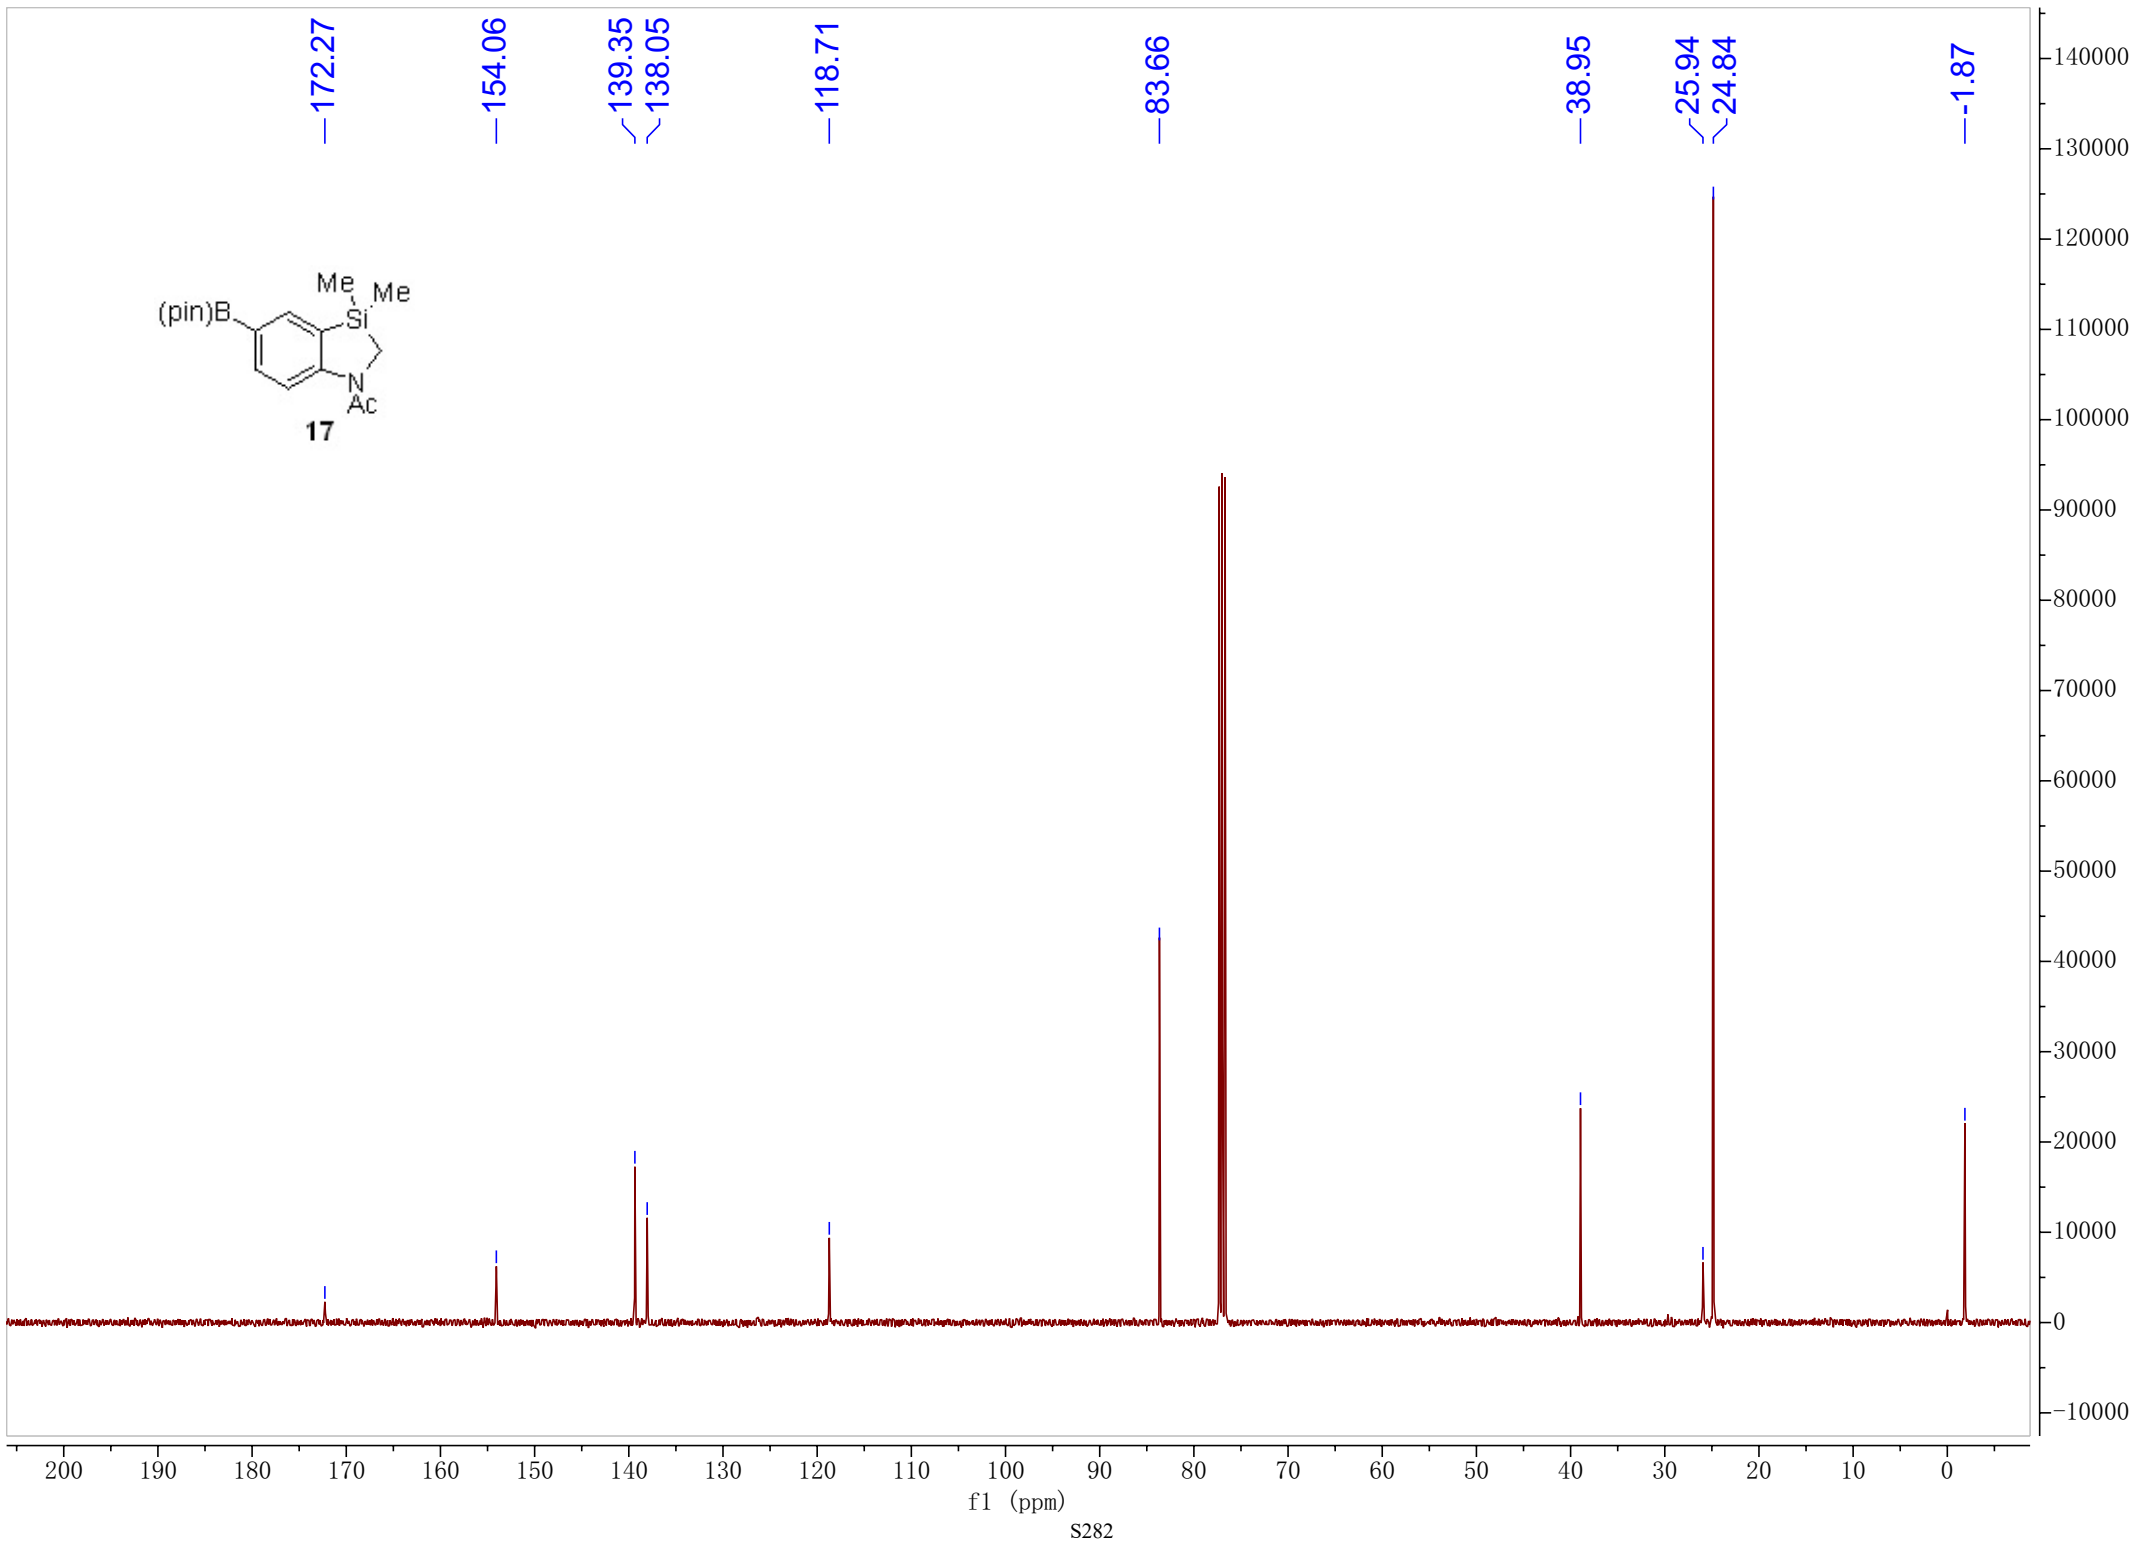

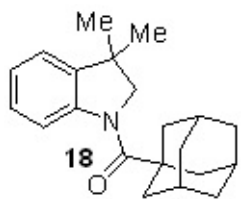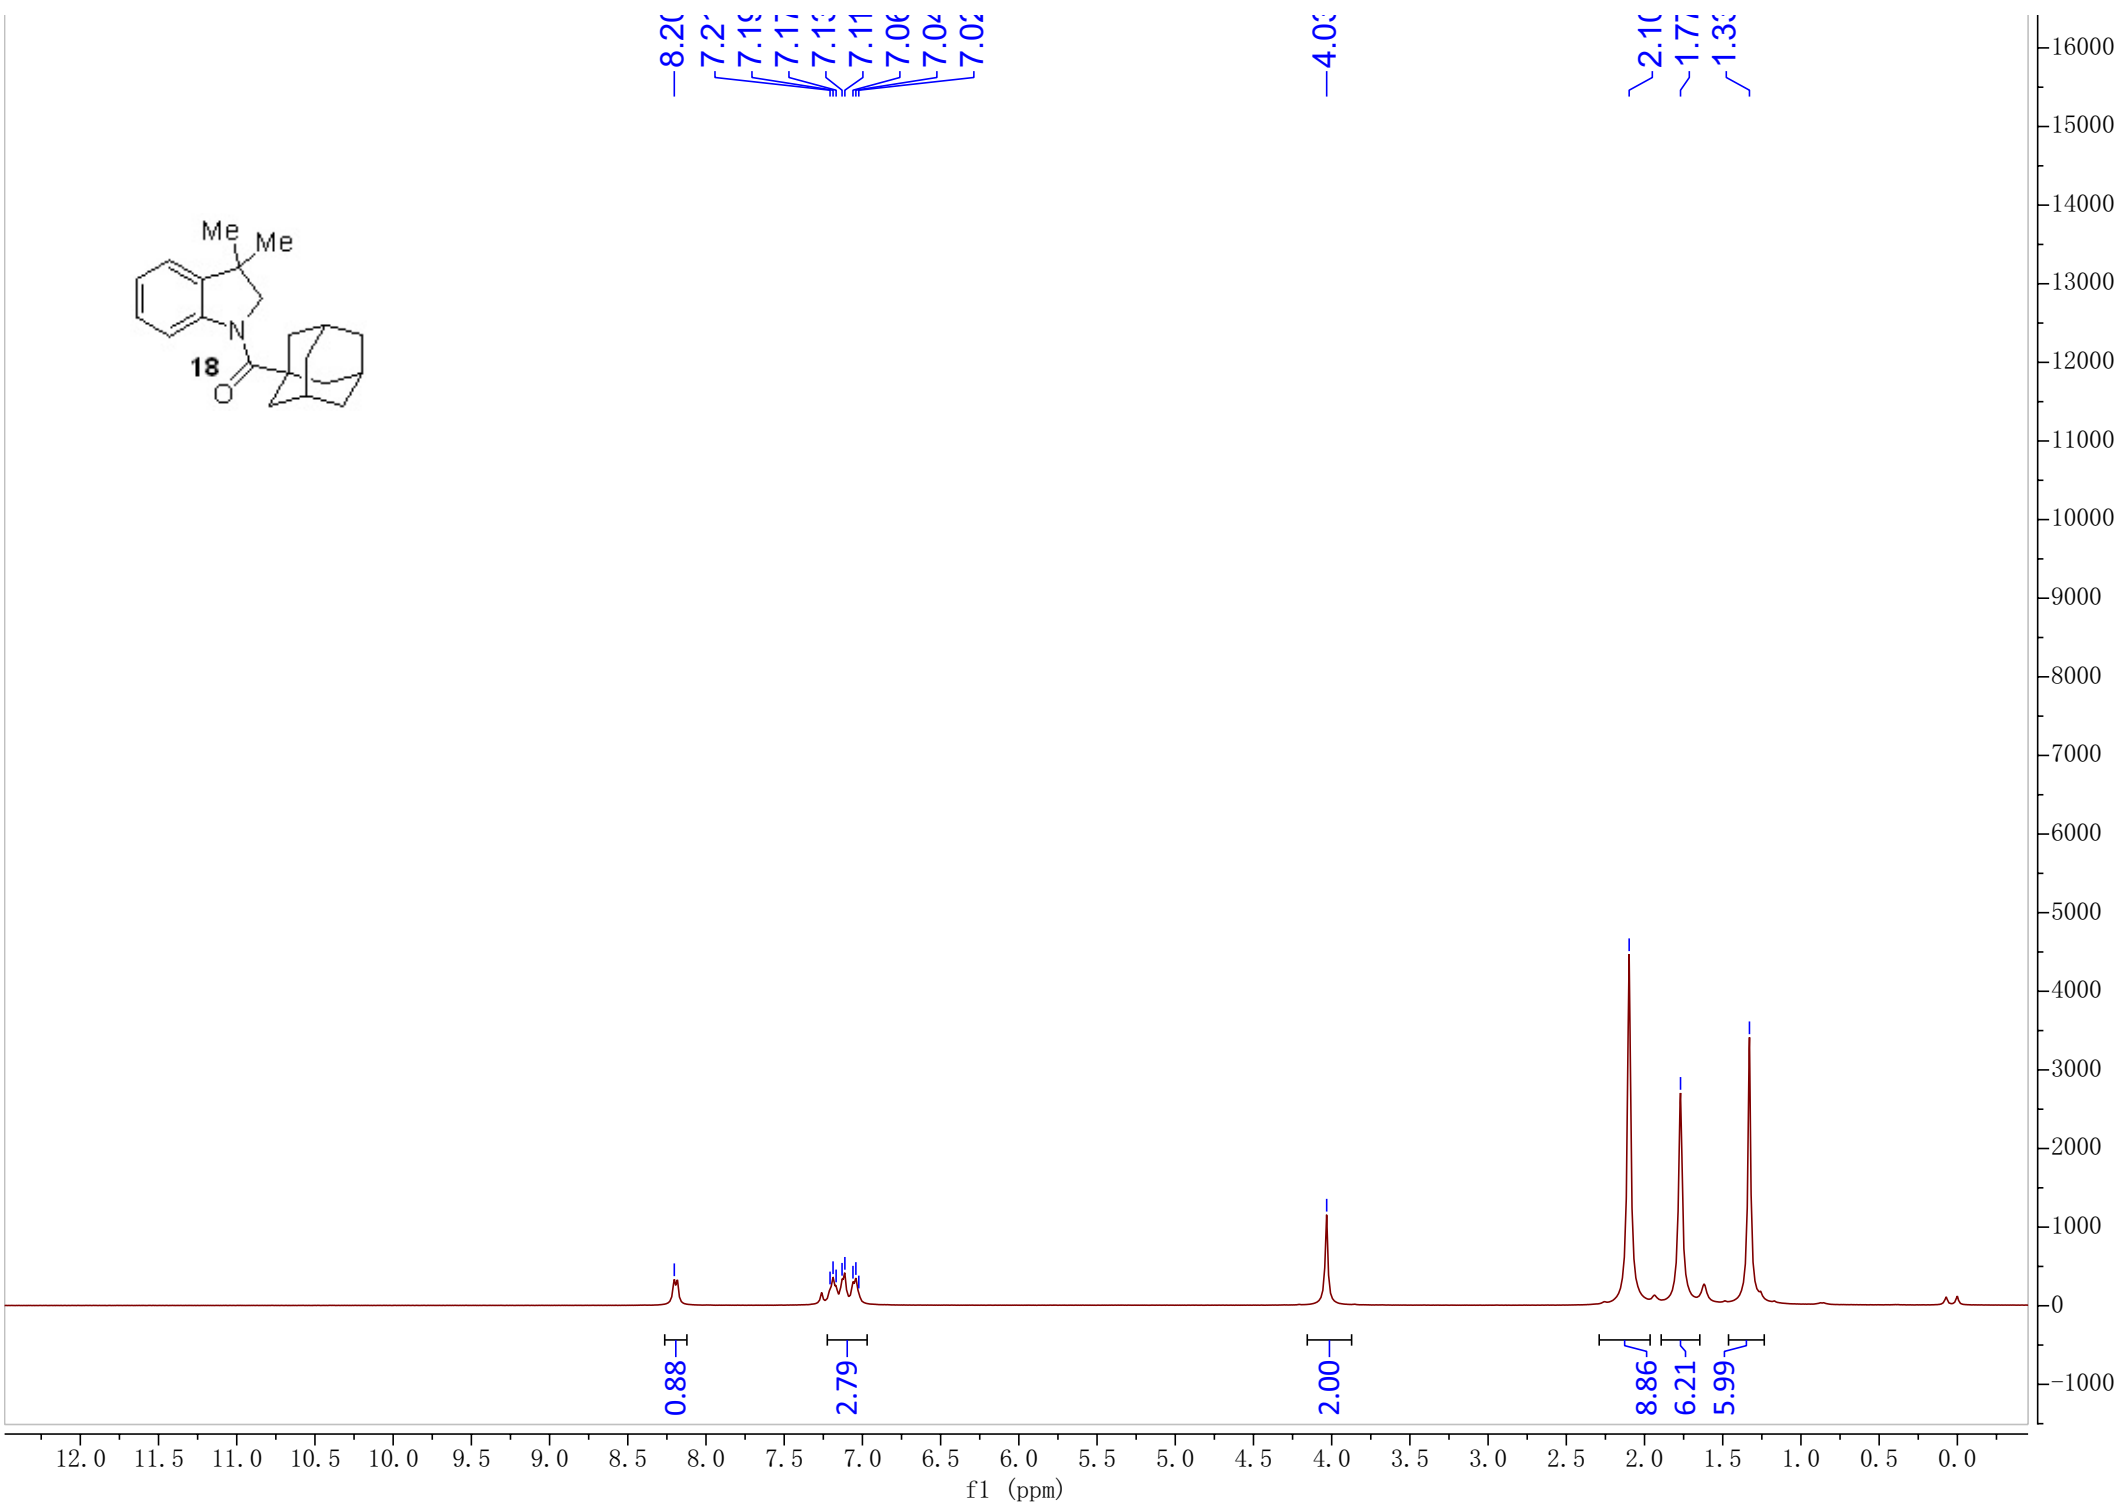

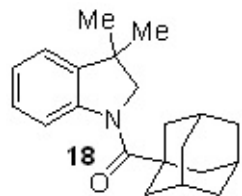

— 176.01

— 143.62

— 139.85

— 127.44

— 123.83

— 121.26

— 118.64

— 63.77

— 42.90

— 40.98

— 38.19

— 36.59

— 28.38

— 27.11

190 180 170 160 150 140 130 120 110 100 90 80 70 60 50 40 30 20 10 0 -10 -20

f1 (ppm)

S284

400000  
350000  
300000  
250000  
200000  
150000  
100000  
50000  
0
